# Supplementary material for: The Selection of a Hepatocyte Cell Line Susceptible to Plasmodium falciparum Sporozoite Invasion That Is Associated With Expression of Glypican-3
Source: Front Microbiol. 2019 Feb 28;10:127. doi: 10.3389/fmicb.2019.00127 (PMC6413710; doi:10.3389/fmicb.2019.00127)
Supplement: Supplementary file 1 [file Table_1.XLSX]

## Sheet: TABLE LEGEND
Table S1. Proteins identified in HC-04 grown in MEM+F12 (CM) and DMEM-NoGlc (basic) medium.
Tab name:
A. All proteins: All proteins identified from the HC-04 cells grown in either media condition.
B. Citrate cycle: Proteins that fit into the citrate cycle based on DAVID pathway classification.
C. Oxidative phosphorylation: Proteins that fit into the oxidative phosphorylation pathway based on DAVID pathway classification
D. Glycolysis: Proteins that fit into the glycolysis pathway based on DAVID pathway classification.
Legend for the tables:
HC-04 CM B01, HC-04 CM B02, HC-04 CM B03, HC-04 basic B01, HC-04 basic B02, HC-04 basic B-03: Proteins were identified from biological replicates 1, 2, and 3 in HC-04 cells grown in MEM+F12 (CM) or DMEM-NoGlc (basic) media.
HC-04 CM avg.: The average relative spectral count from biological replicates 1, 2, and 3 was calculated.
HC-04 DMEM-NoGlc (basic) avg.: The average relative spectral count from biological replicates 1, 2, and 3 was calculated.
CM/basic: The ratio of the average spectral count was compared for cells grown in MEM+F12 (CM) or DMEM-NoGlc (basic) media.
p-value CM/basic: The p-value of the CM/basic ratio was calculated.

## Sheet: A. All proteins
Identified Proteins	Accession Number	Molecular Weight	HC-04 CM B01	HC-04 CM B02	HC-04 CM B03	HC-04 CM avg.	HC-04 basic B01	HC-04 basic B02	HC-04 basic B03	HC-04 basic avg.	CM/basic	log2(CM/basic)	p-value	log10(p-value)
Transgelin OS=Homo sapiens GN=TAGLN PE=1 SV=4	TAGL_HUMAN	626 kDa	0	0	0	0.1	4.1186	7.8886	6.2383	6.08183	0.0164424	-5.92643	0.00507704	2.29439
Single-stranded DNA-binding protein, mitochondrial OS=Homo sapiens GN=SSBP1 PE=1 SV=1	SSBP_HUMAN	550 kDa	0	0	0	0.1	6.1779	3.3808	5.1986	4.9191	0.0203289	-5.62032	0.00387573	2.41165
Asparagine synthetase [glutamine-hydrolyzing] OS=Homo sapiens GN=ASNS PE=1 SV=4	ASNS_HUMAN	1013 kDa	0	0	1.8762	0.6254	20.593	25.92	25.993	24.1687	0.0258765	-5.27221	0.000240911	3.61814
Serine/threonine-protein phosphatase PGAM5, mitochondrial OS=Homo sapiens GN=PGAM5 PE=1 SV=2	PGAM5_HUMAN	403 kDa	0	0	0	0.1	3.0889	2.2539	4.1588	3.1672	0.0315736	-4.98514	0.00454957	2.34203
Testin OS=Homo sapiens GN=TES PE=1 SV=1	TES_HUMAN	404 kDa	0	0	0	0.1	3.0889	2.2539	4.1588	3.1672	0.0315736	-4.98514	0.00454957	2.34203
Transcription factor A, mitochondrial OS=Homo sapiens GN=TFAM PE=1 SV=1	TFAM_HUMAN	386 kDa	0	0	0	0.1	2.0593	4.5078	2.0794	2.88217	0.0346961	-4.84908	0.0238883	1.62181
AP-3 complex subunit beta-1 OS=Homo sapiens GN=AP3B1 PE=1 SV=3	AP3B1_HUMAN	342 kDa	0	0	0	0.1	4.1186	3.3808	0	2.4998	0.0400032	-4.64374	0.119952	0.920992
WD repeat-containing protein 75 OS=Homo sapiens GN=WDR75 PE=1 SV=1	WDR75_HUMAN	327 kDa	0	0	0	0.1	2.0593	2.2539	3.1191	2.47743	0.0403644	-4.63077	0.00160336	2.79497
Guanine nucleotide-binding protein-like 3 OS=Homo sapiens GN=GNL3 PE=1 SV=2	GNL3_HUMAN	309 kDa	0	0	0	0.1	3.0889	2.2539	2.0794	2.47407	0.0404193	-4.62881	0.00136103	2.86613
Succinate dehydrogenase cytochrome b560 subunit, mitochondrial OS=Homo sapiens GN=SDHC PE=1 SV=1	C560_HUMAN	307 kDa	0	0	0	0.1	4.1186	2.2539	1.0397	2.47073	0.0404738	-4.62687	0.0508812	1.29344
Serine/threonine-protein phosphatase 2A activator OS=Homo sapiens GN=PPP2R4 PE=1 SV=3	PTPA_HUMAN	266 kDa	0	0	0	0.1	3.0889	2.2539	1.0397	2.1275	0.0470035	-4.41109	0.0232483	1.63361
Monofunctional C1-tetrahydrofolate synthase, mitochondrial OS=Homo sapiens GN=MTHFD1L PE=1 SV=1	C1TM_HUMAN	239 kDa	0	0	0	0.1	2.0593	3.3808	0	1.81337	0.055146	-4.1806	0.139037	0.856868
Sorting and assembly machinery component 50 homolog OS=Homo sapiens GN=SAMM50 PE=1 SV=3	SAM50_HUMAN	231 kDa	0	0	0	0.1	1.0296	2.2539	2.0794	1.78763	0.0559399	-4.15998	0.00948018	2.02318
Non-syndromic hearing impairment protein 5 OS=Homo sapiens GN=DFNA5 PE=1 SV=2	DFNA5_HUMAN	222 kDa	0	0	0	0.1	3.0889	2.2539	0	1.78093	0.0561503	-4.15456	0.12574	0.900526
Succinate-semialdehyde dehydrogenase, mitochondrial OS=Homo sapiens GN=ALDH5A1 PE=1 SV=2	SSDH_HUMAN	207 kDa	0	0	0	0.1	2.0593	1.1269	2.0794	1.7552	0.0569736	-4.13356	0.00503698	2.29783
Calcium-regulated heat stable protein 1 OS=Homo sapiens GN=CARHSP1 PE=1 SV=2	CHSP1_HUMAN	194 kDa	0	0	0	0.1	3.0889	0	2.0794	1.72277	0.0580462	-4.10666	0.131065	0.882512
Cytoplasmic dynein 1 light intermediate chain 1 OS=Homo sapiens GN=DYNC1LI1 PE=1 SV=3	DC1L1_HUMAN	186 kDa	0	0	0	0.1	1.0296	2.2539	1.0397	1.44107	0.069393	-3.84907	0.0238908	1.62177
Cystathionine beta-synthase OS=Homo sapiens GN=CBS PE=1 SV=2	CBS_HUMAN	165 kDa	0	0	0	0.1	1.0296	0	3.1191	1.3829	0.0723118	-3.78962	0.206255	0.685595
CDGSH iron-sulfur domain-containing protein 2 OS=Homo sapiens GN=CISD2 PE=1 SV=1	CISD2_HUMAN	457 kDa	0.9574	0	0	0.319133	4.1186	4.5078	2.0794	3.5686	0.0894282	-3.48313	0.0164956	1.78263
Leucine--tRNA ligase, cytoplasmic OS=Homo sapiens GN=LARS PE=1 SV=2	SYLC_HUMAN	669 kDa	0	0	1.8762	0.6254	6.1779	7.8886	6.2383	6.76827	0.0924018	-3.43594	0.00185802	2.73095
Protein BUD31 homolog OS=Homo sapiens GN=BUD31 PE=1 SV=2	BUD31_HUMAN	17 kDa	0	0	0	0.1	2.0593	1.1269	0	1.06207	0.094156	-3.4088	0.149	0.826813
Succinyl-CoA ligase [GDP-forming] subunit beta, mitochondrial OS=Homo sapiens GN=SUCLG2 PE=1 SV=2	SUCB2_HUMAN	650 kDa	0.9574	0.94875	0	0.635383	7.2075	3.3808	9.3574	6.64857	0.095567	-3.38734	0.0276575	1.55819
Perilipin-2 OS=Homo sapiens GN=PLIN2 PE=1 SV=2	PLIN2_HUMAN	48 kDa	0	0	0	0.1	3.0889	0	0	1.02963	0.097122	-3.36406	0.373901	0.427243
tRNA (cytosine(34)-C(5))-methyltransferase OS=Homo sapiens GN=NSUN2 PE=1 SV=2	NSUN2_HUMAN	622 kDa	1.9148	0	0	0.638267	5.1482	5.6347	7.278	6.0203	0.106019	-3.2376	0.00404251	2.39335
Enoyl-CoA delta isomerase 1, mitochondrial OS=Homo sapiens GN=ECI1 PE=1 SV=1	ECI1_HUMAN	743 kDa	0	1.8975	0.93809	0.945197	8.2372	7.8886	9.3574	8.4944	0.111273	-3.16783	0.000429892	3.36664
Sideroflexin-1 OS=Homo sapiens GN=SFXN1 PE=1 SV=4	SFXN1_HUMAN	377 kDa	0.9574	0	0	0.319133	0	2.2539	6.2383	2.83073	0.112739	-3.14894	0.246445	0.608279
L-xylulose reductase OS=Homo sapiens GN=DCXR PE=1 SV=2	DCXR_HUMAN	589 kDa	0	1.8975	0	0.6325	4.1186	6.7616	5.1986	5.3596	0.118013	-3.08299	0.00894363	2.04849
N-alpha-acetyltransferase 15, NatA auxiliary subunit OS=Homo sapiens GN=NAA15 PE=1 SV=1	NAA15_HUMAN	310 kDa	0	0	0.93809	0.312697	3.0889	2.2539	2.0794	2.47407	0.12639	-2.98405	0.00806264	2.09352
V-type proton ATPase subunit H OS=Homo sapiens GN=ATP6V1H PE=1 SV=1	VATH_HUMAN	311 kDa	0	0.94875	0	0.31625	3.0889	2.2539	2.0794	2.47407	0.127826	-2.96775	0.00827375	2.0823
N-acetyltransferase 10 OS=Homo sapiens GN=NAT10 PE=1 SV=2	NAT10_HUMAN	312 kDa	0.9574	0	0	0.319133	3.0889	2.2539	2.0794	2.47407	0.128991	-2.95465	0.00844886	2.0732
Mitochondrial ribonuclease P protein 1 OS=Homo sapiens GN=TRMT10C PE=1 SV=2	MRRP1_HUMAN	302 kDa	0	0.94875	0	0.31625	4.1186	1.1269	2.0794	2.44163	0.129524	-2.94871	0.0859765	1.06562
ATP synthase subunit f, mitochondrial OS=Homo sapiens GN=ATP5J2 PE=1 SV=3	ATPK_HUMAN	795 kDa	1.9148	0	1.8762	1.26367	6.1779	14.65	8.3177	9.7152	0.130071	-2.94263	0.0321366	1.493
Cytochrome c oxidase subunit 1 OS=Homo sapiens GN=MT-CO1 PE=1 SV=1	COX1_HUMAN	837 kDa	0	0	4.6905	1.5635	15.445	10.142	8.3177	11.3016	0.138344	-2.85367	0.0212599	1.67244
Argininosuccinate synthase OS=Homo sapiens GN=ASS1 PE=1 SV=2	ASSY_HUMAN	887 kDa	0	1.8975	3.7524	1.8833	12.356	12.396	15.596	13.4493	0.140029	-2.8362	0.0016209	2.79024
Squamous cell carcinoma antigen recognized by T-cells 3 OS=Homo sapiens GN=SART3 PE=1 SV=1	SART3_HUMAN	525 kDa	1.9148	0	0	0.638267	5.1482	2.2539	6.2383	4.5468	0.140377	-2.83262	0.0442689	1.3539
RNA-binding protein 8A OS=Homo sapiens GN=RBM8A PE=1 SV=1	RBM8A_HUMAN	20 kDa	0	0	0	0.1	2.0593	0	0	0.686433	0.145681	-2.77912	0.373901	0.427243
Cytochrome c1, heme protein, mitochondrial OS=Homo sapiens GN=CYC1 PE=1 SV=3	CY1_HUMAN	970 kDa	2.8722	3.795	1.8762	2.8478	19.563	20.285	17.675	19.1743	0.148521	-2.75126	6.87235e-05	4.16289
NEDD8-conjugating enzyme Ubc12 OS=Homo sapiens GN=UBE2M PE=1 SV=1	UBC12_HUMAN	260 kDa	0	0	0.93809	0.312697	2.0593	1.1269	3.1191	2.10177	0.148778	-2.74877	0.0523574	1.28102
cAMP-dependent protein kinase type II-alpha regulatory subunit OS=Homo sapiens GN=PRKAR2A PE=1 SV=2	KAP2_HUMAN	254 kDa	0	0	0.93809	0.312697	1.0296	0	5.1986	2.07607	0.15062	-2.73102	0.337506	0.471718
Putative glycerol kinase 3 OS=Homo sapiens GN=GK3P PE=5 SV=2	GLPK3_HUMAN (+1)	242 kDa	0	0	0.93809	0.312697	1.0296	3.3808	1.0397	1.8167	0.172123	-2.53848	0.148695	0.827704
Exportin-T OS=Homo sapiens GN=XPOT PE=1 SV=2	XPOT_HUMAN	244 kDa	0.9574	0	0	0.319133	1.0296	4.5078	0	1.8458	0.172897	-2.53202	0.336981	0.472394
Utrophin OS=Homo sapiens GN=UTRN PE=1 SV=2	UTRO_HUMAN	236 kDa	0	0	0.93809	0.312697	0	2.2539	3.1191	1.791	0.174593	-2.51793	0.206249	0.685608
NADH dehydrogenase [ubiquinone] 1 beta subcomplex subunit 4 OS=Homo sapiens GN=NDUFB4 PE=1 SV=3	NDUB4_HUMAN	240 kDa	0.9574	0	0	0.319133	2.0593	3.3808	0	1.81337	0.175989	-2.50644	0.221997	0.653652
COP9 signalosome complex subunit 2 OS=Homo sapiens GN=COPS2 PE=1 SV=1	CSN2_HUMAN	232 kDa	0.9574	0	0	0.319133	1.0296	2.2539	2.0794	1.78763	0.178523	-2.48582	0.0420279	1.37646
Methylcrotonoyl-CoA carboxylase beta chain, mitochondrial OS=Homo sapiens GN=MCCC2 PE=1 SV=1	MCCB_HUMAN	202 kDa	0	0.94875	0	0.31625	3.0889	1.1269	1.0397	1.75183	0.180525	-2.46973	0.124377	0.905261
Basic leucine zipper and W2 domain-containing protein 1 OS=Homo sapiens GN=BZW1 PE=1 SV=1	BZW1_HUMAN	201 kDa	0	0.94875	0	0.31625	4.1186	1.1269	0	1.7485	0.180869	-2.46698	0.322131	0.491967
Transmembrane emp24 domain-containing protein 7 OS=Homo sapiens GN=TMED7 PE=1 SV=2	TMED7_HUMAN	566 kDa	0.9574	1.8975	0	0.951633	4.1186	5.6347	5.1986	4.98397	0.190939	-2.38882	0.00472705	2.32541
Nucleobindin-2 OS=Homo sapiens GN=NUCB2 PE=1 SV=2	NUCB2_HUMAN	730 kDa	1.9148	1.8975	0.93809	1.58346	7.2075	9.0155	8.3177	8.18023	0.193572	-2.36906	0.000434876	3.36163
Flavin reductase (NADPH) OS=Homo sapiens GN=BLVRB PE=1 SV=3	BLVRB_HUMAN	788 kDa	1.9148	1.8975	1.8762	1.89617	10.296	10.142	8.3177	9.58523	0.197822	-2.33773	0.000267539	3.57261
GTP:AMP phosphotransferase, mitochondrial OS=Homo sapiens GN=AK3 PE=1 SV=4	KAD3_HUMAN	963 kDa	5.7444	2.8462	2.8143	3.80163	18.534	18.031	19.755	18.7733	0.202502	-2.30399	0.000167537	3.77589
Acyl-coenzyme A thioesterase 2, mitochondrial OS=Homo sapiens GN=ACOT2 PE=1 SV=6	ACOT2_HUMAN	773 kDa	0	1.8975	3.7524	1.8833	10.296	10.142	7.278	9.23867	0.20385	-2.29442	0.00732217	2.13536
Serine/arginine-rich splicing factor 7 OS=Homo sapiens GN=SRSF7 PE=1 SV=1	SRSF7_HUMAN	547 kDa	1.9148	0.94875	0	0.954517	3.0889	6.7616	4.1588	4.66977	0.204404	-2.29051	0.0384519	1.41508
Tryptophan--tRNA ligase, cytoplasmic OS=Homo sapiens GN=WARS PE=1 SV=2	SYWC_HUMAN	1023 kDa	4.787	5.6925	5.6286	5.36937	23.682	20.285	32.231	25.3993	0.211398	-2.24197	0.00493668	2.30656
Cluster of Phosphoenolpyruvate carboxykinase [GTP], mitochondrial OS=Homo sapiens GN=PCK2 PE=1 SV=3 (PCKGM_HUMAN)	PCKGM_HUMAN	1044 kDa	3.8296	4.7437	9.3809	5.98473	28.83	24.793	29.112	27.5783	0.217009	-2.20418	0.000618427	3.20871
Zinc finger protein 638 OS=Homo sapiens GN=ZNF638 PE=1 SV=2	ZN638_HUMAN	383 kDa	0	0	1.8762	0.6254	2.0593	3.3808	3.1191	2.85307	0.219203	-2.18966	0.0402593	1.39513
Low molecular weight phosphotyrosine protein phosphatase OS=Homo sapiens GN=ACP1 PE=1 SV=3	PPAC_HUMAN	517 kDa	0	0.94875	1.8762	0.94165	5.1482	5.6347	2.0794	4.28743	0.21963	-2.18685	0.0539154	1.26829
2-oxoglutarate dehydrogenase, mitochondrial OS=Homo sapiens GN=OGDH PE=1 SV=3	ODO1_HUMAN	378 kDa	0	0.94875	0.93809	0.628947	3.0889	3.3808	2.0794	2.8497	0.220706	-2.1798	0.0116602	1.9333
Aminoacylase-1 OS=Homo sapiens GN=ACY1 PE=1 SV=1	ACY1_HUMAN	678 kDa	0	1.8975	2.8143	1.5706	8.2372	6.7616	6.2383	7.07903	0.221866	-2.17224	0.00573489	2.24147
Succinyl-CoA ligase [ADP/GDP-forming] subunit alpha, mitochondrial OS=Homo sapiens GN=SUCLG1 PE=1 SV=4	SUCA_HUMAN	365 kDa	0	0.94875	0.93809	0.628947	3.0889	2.2539	3.1191	2.82063	0.222981	-2.16501	0.00662326	2.17893
Solute carrier family 2, facilitated glucose transporter member 1 OS=Homo sapiens GN=SLC2A1 PE=1 SV=2	GTR1_HUMAN	1147 kDa	10.531	14.231	14.071	12.9443	44.275	60.855	67.581	57.5703	0.224844	-2.153	0.00315471	2.50104
FAS-associated factor 2 OS=Homo sapiens GN=FAF2 PE=1 SV=2	FAF2_HUMAN	168 kDa	0	0.94875	0	0.31625	3.0889	1.1269	0	1.40527	0.225046	-2.15171	0.318363	0.497078
Mitochondrial antiviral-signaling protein OS=Homo sapiens GN=MAVS PE=1 SV=2	MAVS_HUMAN	148 kDa	0	0	0.93809	0.312697	3.0889	0	1.0397	1.3762	0.227217	-2.13785	0.329975	0.481519
Transmembrane 9 superfamily member 4 OS=Homo sapiens GN=TM9SF4 PE=1 SV=2	TM9S4_HUMAN	494 kDa	0.9574	0	1.8762	0.944533	3.0889	5.6347	3.1191	3.94757	0.23927	-2.06329	0.0401214	1.39662
Isochorismatase domain-containing protein 2, mitochondrial OS=Homo sapiens GN=ISOC2 PE=1 SV=1	ISOC2_HUMAN	708 kDa	1.9148	1.8975	1.8762	1.89617	9.2668	6.7616	7.278	7.7688	0.244075	-2.03461	0.00153895	2.81278
Phosphate carrier protein, mitochondrial OS=Homo sapiens GN=SLC25A3 PE=1 SV=2	MPCP_HUMAN	949 kDa	4.787	4.7437	3.7524	4.4277	16.474	16.904	19.755	17.711	0.249997	-2.00002	0.000254262	3.59472
39S ribosomal protein L13, mitochondrial OS=Homo sapiens GN=MRPL13 PE=1 SV=1	RM13_HUMAN	328 kDa	1.9148	0	0	0.638267	2.0593	2.2539	3.1191	2.47743	0.257632	-1.95662	0.0622006	1.20621
Protein S100-P OS=Homo sapiens GN=S100P PE=1 SV=2	S100P_HUMAN	746 kDa	1.9148	1.8975	2.8143	2.20887	8.2372	10.142	7.278	8.5524	0.258274	-1.95302	0.00208725	2.68043
Alanine--tRNA ligase, cytoplasmic OS=Homo sapiens GN=AARS PE=1 SV=2	SYAC_HUMAN	1134 kDa	10.531	16.129	10.319	12.3263	38.097	47.331	57.184	47.5373	0.259298	-1.94732	0.00378995	2.42137
Disco-interacting protein 2 homolog B OS=Homo sapiens GN=DIP2B PE=1 SV=3	DIP2B_HUMAN	462 kDa	0.9574	0	1.8762	0.944533	3.0889	4.5078	3.1191	3.57193	0.264432	-1.91903	0.0213839	1.66991
Lipoma-preferred partner OS=Homo sapiens GN=LPP PE=1 SV=1	LPP_HUMAN	66 kDa	0	0	0	0.1	0	1.1269	0	0.375633	0.266217	-1.90933	0.373901	0.427243
Protein S100-A11 OS=Homo sapiens GN=S100A11 PE=1 SV=2	S10AB_HUMAN	592 kDa	2.8722	0	1.8762	1.5828	0	3.3808	13.516	5.63227	0.281024	-1.83124	0.384144	0.415505
Lon protease homolog, mitochondrial OS=Homo sapiens GN=LONP1 PE=1 SV=2	LONM_HUMAN	989 kDa	6.7018	6.6412	4.6905	6.01117	18.534	23.666	20.794	20.998	0.286273	-1.80453	0.000768632	3.11428
Protein AATF OS=Homo sapiens GN=AATF PE=1 SV=1	AATF_HUMAN	63 kDa	0	0	0	0.1	0	0	1.0397	0.346567	0.288545	-1.79313	0.373901	0.427243
Nuclear pore glycoprotein p62 OS=Homo sapiens GN=NUP62 PE=1 SV=3	NUP62_HUMAN	53 kDa	0	0	0	0.1	1.0296	0	0	0.3432	0.291375	-1.77905	0.373901	0.427243
28 kDa heat- and acid-stable phosphoprotein OS=Homo sapiens GN=PDAP1 PE=1 SV=1	HAP28_HUMAN	21 kDa	0	0	0	0.1	1.0296	0	0	0.3432	0.291375	-1.77905	0.373901	0.427243
Ubiquitin carboxyl-terminal hydrolase 14 OS=Homo sapiens GN=USP14 PE=1 SV=3	UBP14_HUMAN	56 kDa	0	0	0.93809	0.312697	2.0593	1.1269	0	1.06207	0.294423	-1.76404	0.327569	0.484698
Mitochondrial import receptor subunit TOM40 homolog OS=Homo sapiens GN=TOMM40 PE=1 SV=1	TOM40_HUMAN	694 kDa	0.9574	0.94875	4.6905	2.19888	7.2075	7.8886	7.278	7.45803	0.294834	-1.76202	0.0141535	1.84914
RRP12-like protein OS=Homo sapiens GN=RRP12 PE=1 SV=2	RRP12_HUMAN	408 kDa	0	0.94875	1.8762	0.94165	4.1186	3.3808	2.0794	3.19293	0.294917	-1.76162	0.0490534	1.30933
Transportin-1 OS=Homo sapiens GN=TNPO1 PE=1 SV=2	TNPO1_HUMAN	414 kDa	0.9574	0	1.8762	0.944533	2.0593	3.3808	4.1588	3.19963	0.2952	-1.76023	0.050992	1.2925
Hypoxia up-regulated protein 1 OS=Homo sapiens GN=HYOU1 PE=1 SV=1	HYOU1_HUMAN	1155 kDa	16.276	18.026	23.452	19.2513	55.601	60.855	79.018	65.158	0.295456	-1.75898	0.00346125	2.46077
Mitochondrial import inner membrane translocase subunit TIM44 OS=Homo sapiens GN=TIMM44 PE=1 SV=2	TIM44_HUMAN	255 kDa	0	0.94875	0.93809	0.628947	4.1186	1.1269	1.0397	2.09507	0.300204	-1.73599	0.238747	0.622061
39S ribosomal protein L47, mitochondrial OS=Homo sapiens GN=MRPL47 PE=1 SV=2	RM47_HUMAN	29 kDa	0	0	0.93809	0.312697	2.0593	0	1.0397	1.033	0.302707	-1.724	0.343949	0.463506
Nucleolar complex protein 4 homolog OS=Homo sapiens GN=NOC4L PE=1 SV=1	NOC4L_HUMAN	58 kDa	0.9574	0	0	0.319133	0	0	3.1191	1.0397	0.306948	-1.70394	0.54385	0.264521
3-hydroxyacyl-CoA dehydrogenase type-2 OS=Homo sapiens GN=HSD17B10 PE=1 SV=3	HCD2_HUMAN	849 kDa	1.9148	4.7437	4.6905	3.783	11.326	12.396	11.437	11.7197	0.322791	-1.63133	0.00133397	2.87485
Aminopeptidase N OS=Homo sapiens GN=ANPEP PE=1 SV=4	AMPN_HUMAN	992 kDa	8.6166	3.795	8.4428	6.95147	16.474	21.412	25.993	21.293	0.326467	-1.61499	0.0106227	1.97376
Flotillin-1 OS=Homo sapiens GN=FLOT1 PE=1 SV=3	FLOT1_HUMAN	661 kDa	3.8296	1.8975	0.93809	2.22173	7.2075	6.7616	6.2383	6.7358	0.329839	-1.60017	0.00727042	2.13844
Ras-related protein Rap-1b OS=Homo sapiens GN=RAP1B PE=1 SV=1	RAP1B_HUMAN	791 kDa	4.787	1.8975	2.8143	3.16627	7.2075	10.142	11.437	9.5955	0.329974	-1.59958	0.013194	1.87962
26S proteasome non-ATPase regulatory subunit 8 OS=Homo sapiens GN=PSMD8 PE=1 SV=2	PSMD8_HUMAN	384 kDa	1.9148	0.94875	0	0.954517	2.0593	3.3808	3.1191	2.85307	0.334558	-1.57967	0.0501792	1.29948
Thiosulfate sulfurtransferase OS=Homo sapiens GN=TST PE=1 SV=4	THTR_HUMAN	599 kDa	1.9148	1.8975	1.8762	1.89617	7.2075	5.6347	4.1588	5.667	0.334598	-1.5795	0.0128114	1.8924
Peptidyl-prolyl cis-trans isomerase FKBP11 OS=Homo sapiens GN=FKBP11 PE=1 SV=1	FKB11_HUMAN	603 kDa	2.8722	0.94875	1.8762	1.89905	6.1779	5.6347	5.1986	5.6704	0.334906	-1.57817	0.00376776	2.42392
Exportin-5 OS=Homo sapiens GN=XPO5 PE=1 SV=1	XPO5_HUMAN	703 kDa	1.9148	1.8975	3.7524	2.52157	6.1779	10.142	6.2383	7.5194	0.335341	-1.5763	0.0260544	1.58412
AP-3 complex subunit delta-1 OS=Homo sapiens GN=AP3D1 PE=1 SV=1	AP3D1_HUMAN	704 kDa	2.8722	1.8975	2.8143	2.528	6.1779	10.142	6.2383	7.5194	0.336197	-1.57262	0.020828	1.68135
cAMP-dependent protein kinase type I-alpha regulatory subunit OS=Homo sapiens GN=PRKAR1A PE=1 SV=1	KAP0_HUMAN	647 kDa	2.8722	1.8975	1.8762	2.2153	4.1186	9.0155	6.2383	6.45747	0.34306	-1.54347	0.043471	1.3618
Periodic tryptophan protein 2 homolog OS=Homo sapiens GN=PWP2 PE=1 SV=2	PWP2_HUMAN	355 kDa	2.8722	0	0	0.9574	5.1482	0	3.1191	2.75577	0.347417	-1.52526	0.368807	0.433201
Cellular nucleic acid-binding protein OS=Homo sapiens GN=CNBP PE=1 SV=1	CNBP_HUMAN	633 kDa	2.8722	1.8975	1.8762	2.2153	5.1482	5.6347	8.3177	6.36687	0.347942	-1.52308	0.0161764	1.79112
Protein RRP5 homolog OS=Homo sapiens GN=PDCD11 PE=1 SV=3	RRP5_HUMAN	223 kDa	0	1.8975	0	0.6325	3.0889	2.2539	0	1.78093	0.355151	-1.4935	0.362573	0.440605
Cluster of Cytochrome b-c1 complex subunit Rieske, mitochondrial OS=Homo sapiens GN=UQCRFS1 PE=1 SV=2 (UCRI_HUMAN)	UCRI_HUMAN [2]	573 kDa	1.9148	1.8975	1.8762	1.89617	7.2075	3.3808	5.1986	5.2623	0.36033	-1.47261	0.0381865	1.41809
Vacuolar protein sorting-associated protein 29 OS=Homo sapiens GN=VPS29 PE=1 SV=1	VPS29_HUMAN	198 kDa	0	0.94875	0.93809	0.628947	2.0593	0	3.1191	1.72613	0.364367	-1.45653	0.320433	0.494263
Vesicle-fusing ATPase OS=Homo sapiens GN=NSF PE=1 SV=3	NSF_HUMAN	657 kDa	3.8296	0.94875	2.8143	2.53088	8.2372	6.7616	5.1986	6.73247	0.375922	-1.41149	0.0260037	1.58496
Protein FAM136A OS=Homo sapiens GN=FAM136A PE=1 SV=1	F136A_HUMAN	345 kDa	0	1.8975	0.93809	0.945197	2.0593	3.3808	2.0794	2.5065	0.377098	-1.40699	0.0898368	1.04655
Monocarboxylate transporter 1 OS=Homo sapiens GN=SLC16A1 PE=1 SV=3	MOT1_HUMAN	313 kDa	0	0	2.8143	0.9381	3.0889	2.2539	2.0794	2.47407	0.379173	-1.39907	0.195178	0.709568
Carbonyl reductase [NADPH] 1 OS=Homo sapiens GN=CBR1 PE=1 SV=3	CBR1_HUMAN	568 kDa	2.8722	1.8975	0.93809	1.9026	4.1186	6.7616	4.1588	5.013	0.379533	-1.3977	0.0400144	1.39778
NADH dehydrogenase [ubiquinone] flavoprotein 2, mitochondrial OS=Homo sapiens GN=NDUFV2 PE=1 SV=2	NDUV2_HUMAN	565 kDa	1.9148	1.8975	1.8762	1.89617	5.1482	5.6347	4.1588	4.98057	0.380713	-1.39322	0.00207752	2.68246
Pyrroline-5-carboxylate reductase 2 OS=Homo sapiens GN=PYCR2 PE=1 SV=1	P5CR2_HUMAN	695 kDa	3.8296	1.8975	2.8143	2.84713	7.2075	7.8886	7.278	7.45803	0.381754	-1.38929	0.00152684	2.81621
Transmembrane emp24 domain-containing protein 5 OS=Homo sapiens GN=TMED5 PE=1 SV=1	TMED5_HUMAN	314 kDa	0.9574	0.94875	0.93809	0.94808	3.0889	2.2539	2.0794	2.47407	0.383207	-1.3838	0.00805679	2.09384
Cytochrome c oxidase subunit 6B1 OS=Homo sapiens GN=COX6B1 PE=1 SV=2	CX6B1_HUMAN	593 kDa	1.9148	1.8975	2.8143	2.20887	6.1779	4.5078	6.2383	5.64133	0.39155	-1.35273	0.00592579	2.22725
Transmembrane 9 superfamily member 3 OS=Homo sapiens GN=TM9SF3 PE=1 SV=2	TM9S3_HUMAN	415 kDa	0	1.8975	1.8762	1.2579	2.0593	3.3808	4.1588	3.19963	0.393139	-1.34689	0.0915073	1.03854
Protein mago nashi homolog 2 OS=Homo sapiens GN=MAGOHB PE=1 SV=1	MGN2_HUMAN (+1)	409 kDa	0	1.8975	1.8762	1.2579	4.1186	3.3808	2.0794	3.19293	0.393964	-1.34387	0.0893184	1.04906
Prohibitin-2 OS=Homo sapiens GN=PHB2 PE=1 SV=2	PHB2_HUMAN	1124 kDa	22.02	14.231	17.824	18.025	42.215	37.189	57.184	45.5293	0.395899	-1.3368	0.012759	1.89418
Isoleucine--tRNA ligase, cytoplasmic OS=Homo sapiens GN=IARS PE=1 SV=2	SYIC_HUMAN	947 kDa	4.787	4.7437	11.257	6.92923	17.504	16.904	17.675	17.361	0.399126	-1.32508	0.0086932	2.06082
Mesencephalic astrocyte-derived neurotrophic factor OS=Homo sapiens GN=MANF PE=1 SV=3	MANF_HUMAN	679 kDa	3.8296	2.8462	1.8762	2.85067	7.2075	6.7616	7.278	7.08237	0.402502	-1.31293	0.00195809	2.70817
Nucleolar protein 56 OS=Homo sapiens GN=NOP56 PE=1 SV=4	NOP56_HUMAN	997 kDa	10.531	7.59	8.4428	8.8546	21.623	21.412	22.874	21.9697	0.403038	-1.31101	0.000184351	3.73436
Ras GTPase-activating-like protein IQGAP1 OS=Homo sapiens GN=IQGAP1 PE=1 SV=1	IQGA1_HUMAN	489 kDa	1.9148	0.94875	1.8762	1.57992	3.0889	4.5078	4.1588	3.9185	0.403194	-1.31045	0.0116514	1.93362
Glutamate--cysteine ligase regulatory subunit OS=Homo sapiens GN=GCLM PE=1 SV=1	GSH0_HUMAN	480 kDa	0	1.8975	2.8143	1.5706	4.1186	3.3808	4.1588	3.88607	0.404162	-1.30699	0.0556652	1.25442
Alcohol dehydrogenase class-3 OS=Homo sapiens GN=ADH5 PE=1 SV=4	ADHX_HUMAN	530 kDa	0.9574	2.8462	1.8762	1.89327	5.1482	4.5078	4.1588	4.60493	0.411139	-1.2823	0.01177	1.92922
Fatty acid-binding protein, liver OS=Homo sapiens GN=FABP1 PE=1 SV=1	FABPL_HUMAN	534 kDa	1.9148	1.8975	1.8762	1.89617	4.1186	4.5078	5.1986	4.60833	0.411465	-1.28116	0.00101223	2.99472
Destrin OS=Homo sapiens GN=DSTN PE=1 SV=3	DEST_HUMAN	535 kDa	1.9148	1.8975	1.8762	1.89617	4.1186	4.5078	5.1986	4.60833	0.411465	-1.28116	0.00101223	2.99472
Serine/arginine-rich splicing factor 3 OS=Homo sapiens GN=SRSF3 PE=1 SV=1	SRSF3_HUMAN	579 kDa	2.8722	1.8975	1.8762	2.2153	5.1482	4.5078	6.2383	5.2981	0.418131	-1.25797	0.00690477	2.16085
Asparagine--tRNA ligase, cytoplasmic OS=Homo sapiens GN=NARS PE=1 SV=1	SYNC_HUMAN	860 kDa	4.787	3.795	6.5666	5.04953	11.326	12.396	12.477	12.0663	0.418481	-1.25677	0.00140901	2.85109
Glycine--tRNA ligase OS=Homo sapiens GN=GARS PE=1 SV=3	SYG_HUMAN	1106 kDa	13.404	13.282	23.452	16.7127	39.127	33.808	46.787	39.9073	0.418787	-1.25571	0.0101138	1.99509
Serine--tRNA ligase, cytoplasmic OS=Homo sapiens GN=SARS PE=1 SV=3	SYSC_HUMAN	830 kDa	3.8296	4.7437	5.6286	4.73397	10.296	11.269	11.437	11.0007	0.430335	-1.21647	0.000571736	3.2428
2,4-dienoyl-CoA reductase, mitochondrial OS=Homo sapiens GN=DECR1 PE=1 SV=1	DECR_HUMAN	784 kDa	4.787	4.7437	2.8143	4.115	6.1779	7.8886	14.556	9.54083	0.431304	-1.21322	0.108773	0.96348
Vinculin OS=Homo sapiens GN=VCL PE=1 SV=4	VINC_HUMAN	524 kDa	1.9148	0.94875	2.8143	1.89262	2.0593	7.8886	3.1191	4.35567	0.434518	-1.20251	0.258593	0.587383
Protein canopy homolog 2 OS=Homo sapiens GN=CNPY2 PE=1 SV=1	CNPY2_HUMAN	921 kDa	6.7018	7.59	5.6286	6.64013	9.2668	12.396	23.913	15.1919	0.437083	-1.19402	0.129486	0.887776
Nucleolar complex protein 2 homolog OS=Homo sapiens GN=NOC2L PE=1 SV=4	NOC2L_HUMAN	291 kDa	0.9574	0.94875	0.93809	0.94808	2.0593	3.3808	1.0397	2.15993	0.438939	-1.18791	0.148269	0.828951
Calcium-binding mitochondrial carrier protein Aralar1 OS=Homo sapiens GN=SLC25A12 PE=1 SV=2	CMC1_HUMAN	468 kDa	2.8722	0	1.8762	1.5828	3.0889	5.6347	2.0794	3.601	0.439545	-1.18592	0.209788	0.67822
4F2 cell-surface antigen heavy chain OS=Homo sapiens GN=SLC3A2 PE=1 SV=3	4F2_HUMAN	1121 kDa	19.148	20.872	18.762	19.594	42.215	43.951	46.787	44.3177	0.442126	-1.17747	7.56386e-05	4.12126
Farnesyl pyrophosphate synthase OS=Homo sapiens GN=FDPS PE=1 SV=4	FPPS_HUMAN	607 kDa	1.9148	1.8975	3.7524	2.52157	5.1482	5.6347	6.2383	5.67373	0.444428	-1.16998	0.0103509	1.98502
Acyl-CoA synthetase short-chain family member 3, mitochondrial OS=Homo sapiens GN=ACSS3 PE=2 SV=1	ACSS3_HUMAN	716 kDa	2.8722	3.795	3.7524	3.4732	6.1779	7.8886	9.3574	7.80797	0.444828	-1.16868	0.0109555	1.96037
Ethanolamine-phosphate cytidylyltransferase OS=Homo sapiens GN=PCYT2 PE=1 SV=1	PCY2_HUMAN	507 kDa	1.9148	1.8975	1.8762	1.89617	4.1186	4.5078	4.1588	4.26173	0.444929	-1.16835	4.45994e-05	4.35067
Eukaryotic translation initiation factor 4B OS=Homo sapiens GN=EIF4B PE=1 SV=2	IF4B_HUMAN	557 kDa	1.9148	1.8975	2.8143	2.20887	5.1482	4.5078	5.1986	4.95153	0.446098	-1.16457	0.00187094	2.72794
Acyl-protein thioesterase 2 OS=Homo sapiens GN=LYPLA2 PE=1 SV=1	LYPA2_HUMAN	767 kDa	2.8722	3.795	5.6286	4.0986	9.2668	7.8886	10.397	9.18413	0.44627	-1.16401	0.00946753	2.02376
Cluster of Erlin-2 OS=Homo sapiens GN=ERLIN2 PE=1 SV=1 (ERLN2_HUMAN)	ERLN2_HUMAN	261 kDa	0	0	2.8143	0.9381	2.0593	1.1269	3.1191	2.10177	0.446339	-1.16379	0.349981	0.455955
Serpin B6 OS=Homo sapiens GN=SERPINB6 PE=1 SV=3	SPB6_HUMAN	594 kDa	0.9574	2.8462	3.7524	2.51867	6.1779	4.5078	6.2383	5.64133	0.446467	-1.16338	0.0354005	1.45099
DnaJ homolog subfamily B member 11 OS=Homo sapiens GN=DNAJB11 PE=1 SV=1	DJB11_HUMAN	360 kDa	0.9574	0.94875	1.8762	1.26078	4.1186	2.2539	2.0794	2.8173	0.447515	-1.15999	0.0971816	1.01242
Cation-independent mannose-6-phosphate receptor OS=Homo sapiens GN=IGF2R PE=1 SV=3	MPRI_HUMAN	676 kDa	3.8296	2.8462	2.8143	3.16337	6.1779	5.6347	9.3574	7.05667	0.448281	-1.15753	0.0321813	1.4924
Nodal modulator 1 OS=Homo sapiens GN=NOMO1 PE=1 SV=5	NOMO1_HUMAN	503 kDa	2.8722	0.94875	1.8762	1.89905	4.1186	3.3808	5.1986	4.23267	0.448665	-1.15629	0.0381877	1.41808
Protein RER1 OS=Homo sapiens GN=RER1 PE=1 SV=1	RER1_HUMAN	262 kDa	0	1.8975	0.93809	0.945197	2.0593	1.1269	3.1191	2.10177	0.449715	-1.15292	0.21918	0.6592
Isochorismatase domain-containing protein 1 OS=Homo sapiens GN=ISOC1 PE=1 SV=3	ISOC1_HUMAN	256 kDa	0.9574	0.94875	0.93809	0.94808	3.0889	1.1269	2.0794	2.0984	0.451811	-1.14621	0.112134	0.950263
Delta-1-pyrroline-5-carboxylate dehydrogenase, mitochondrial OS=Homo sapiens GN=ALDH4A1 PE=1 SV=3	AL4A1_HUMAN	1060 kDa	14.361	11.385	15.009	13.585	31.919	32.681	24.953	29.851	0.455094	-1.13576	0.00382603	2.41725
Cluster of Histone deacetylase 2 OS=Homo sapiens GN=HDAC2 PE=1 SV=2 (HDAC2_HUMAN)	HDAC2_HUMAN	55 kDa	0	0	0.93809	0.312697	2.0593	0	0	0.686433	0.455538	-1.13436	0.646251	0.189599
Protein SET OS=Homo sapiens GN=SET PE=1 SV=3	SET_HUMAN	940 kDa	9.574	7.59	5.6286	7.59753	17.504	16.904	15.596	16.668	0.455816	-1.13348	0.00203668	2.69108
Endoplasmic reticulum resident protein 44 OS=Homo sapiens GN=ERP44 PE=1 SV=1	ERP44_HUMAN	855 kDa	6.7018	5.6925	3.7524	5.38223	11.326	14.65	9.3574	11.7778	0.456981	-1.12979	0.0225065	1.64769
3-hydroxyisobutyrate dehydrogenase, mitochondrial OS=Homo sapiens GN=HIBADH PE=1 SV=2	3HIDH_HUMAN	865 kDa	4.787	4.7437	7.5047	5.67847	9.2668	11.269	16.635	12.3903	0.458301	-1.12563	0.0479214	1.31947
78 kDa glucose-regulated protein OS=Homo sapiens GN=HSPA5 PE=1 SV=2	GRP78_HUMAN	1222 kDa	188.61	197.34	190.43	192.127	396.41	453.03	407.57	419.003	0.458533	-1.1249	0.000205081	3.68807
Enoyl-CoA delta isomerase 2, mitochondrial OS=Homo sapiens GN=ECI2 PE=1 SV=4	ECI2_HUMAN	828 kDa	4.787	5.6925	4.6905	5.05667	10.296	9.0155	13.516	10.9425	0.462113	-1.11368	0.0128829	1.88999
39S ribosomal protein L28, mitochondrial OS=Homo sapiens GN=MRPL28 PE=1 SV=4	RM28_HUMAN	30 kDa	0.9574	0	0	0.319133	2.0593	0	0	0.686433	0.464915	-1.10496	0.652904	0.185151
Nuclear cap-binding protein subunit 1 OS=Homo sapiens GN=NCBP1 PE=1 SV=1	NCBP1_HUMAN	92 kDa	0.9574	0	0	0.319133	2.0593	0	0	0.686433	0.464915	-1.10496	0.652904	0.185151
Pyruvate dehydrogenase E1 component subunit beta, mitochondrial OS=Homo sapiens GN=PDHB PE=1 SV=3	ODPB_HUMAN	668 kDa	1.9148	3.795	3.7524	3.15407	7.2075	7.8886	5.1986	6.7649	0.46624	-1.10086	0.0238541	1.62244
Cluster of ADP/ATP translocase 2 OS=Homo sapiens GN=SLC25A5 PE=1 SV=7 (ADT2_HUMAN)	ADT2_HUMAN [3]	1160 kDa	39.254	31.309	26.267	32.2767	76.194	64.235	66.542	68.9903	0.467843	-1.0959	0.00222178	2.6533
NAD(P) transhydrogenase, mitochondrial OS=Homo sapiens GN=NNT PE=1 SV=3	NNTM_HUMAN	658 kDa	2.8722	2.8462	3.7524	3.15693	8.2372	6.7616	5.1986	6.73247	0.468912	-1.09261	0.0181576	1.74094
26S proteasome non-ATPase regulatory subunit 12 OS=Homo sapiens GN=PSMD12 PE=1 SV=3	PSD12_HUMAN	654 kDa	1.9148	4.7437	2.8143	3.1576	8.2372	5.6347	6.2383	6.7034	0.471045	-1.08606	0.0364941	1.43778
Mitochondrial import receptor subunit TOM22 homolog OS=Homo sapiens GN=TOMM22 PE=1 SV=3	TOM22_HUMAN	624 kDa	4.787	3.795	0	2.86067	6.1779	6.7616	5.1986	6.04603	0.473148	-1.07964	0.105518	0.976672
Prohibitin OS=Homo sapiens GN=PHB PE=1 SV=1	PHB_HUMAN	1099 kDa	18.191	18.975	18.762	18.6427	40.156	41.697	35.35	39.0677	0.477189	-1.06737	0.000447159	3.34954
Serpin H1 OS=Homo sapiens GN=SERPINH1 PE=1 SV=2	SERPH_HUMAN	936 kDa	6.7018	6.6412	10.319	7.88733	14.415	19.158	15.596	16.3897	0.481238	-1.05518	0.0105151	1.97819
Lupus La protein OS=Homo sapiens GN=SSB PE=1 SV=2	LA_HUMAN	1071 kDa	17.233	11.385	18.762	15.7933	35.008	27.046	36.39	32.8147	0.481289	-1.05503	0.00982792	2.00754
NADH dehydrogenase [ubiquinone] iron-sulfur protein 3, mitochondrial OS=Homo sapiens GN=NDUFS3 PE=1 SV=1	NDUS3_HUMAN	744 kDa	4.787	3.795	3.7524	4.11147	7.2075	9.0155	9.3574	8.5268	0.482182	-1.05235	0.00411637	2.38549
Glycerol-3-phosphate dehydrogenase [NAD(+)], cytoplasmic OS=Homo sapiens GN=GPD1 PE=1 SV=4	GPDA_HUMAN	689 kDa	1.9148	2.8462	5.6286	3.4632	6.1779	9.0155	6.2383	7.1439	0.484777	-1.04461	0.0648312	1.18822
Alpha-soluble NSF attachment protein OS=Homo sapiens GN=NAPA PE=1 SV=3	SNAA_HUMAN	484 kDa	1.9148	2.8462	0.93809	1.8997	3.0889	3.3808	5.1986	3.88943	0.488425	-1.03379	0.0816263	1.08817
Eukaryotic translation initiation factor 3 subunit G OS=Homo sapiens GN=EIF3G PE=1 SV=2	EIF3G_HUMAN	648 kDa	1.9148	3.795	3.7524	3.15407	4.1186	9.0155	6.2383	6.45747	0.488437	-1.03376	0.0996658	1.00145
Cluster of Sarcoplasmic/endoplasmic reticulum calcium ATPase 2 OS=Homo sapiens GN=ATP2A2 PE=1 SV=1 (AT2A2_HUMAN)	AT2A2_HUMAN [2]	929 kDa	7.6592	5.6925	10.319	7.89023	15.445	14.65	17.675	15.9233	0.495514	-1.013	0.00767386	2.11499
Heterogeneous nuclear ribonucleoprotein A3 OS=Homo sapiens GN=HNRNPA3 PE=1 SV=2	ROA3_HUMAN	1141 kDa	26.807	20.872	30.019	25.8993	43.245	54.093	59.264	52.2007	0.496149	-1.01115	0.00836388	2.07759
Delta(3,5)-Delta(2,4)-dienoyl-CoA isomerase, mitochondrial OS=Homo sapiens GN=ECH1 PE=1 SV=2	ECH1_HUMAN	612 kDa	2.8722	1.8975	3.7524	2.8407	6.1779	6.7616	4.1588	5.69943	0.498418	-1.00457	0.0399881	1.39807
60S ribosomal protein L37a OS=Homo sapiens GN=RPL37A PE=1 SV=2	RL37A_HUMAN	613 kDa	2.8722	2.8462	2.8143	2.84423	6.1779	6.7616	4.1588	5.69943	0.499038	-1.00278	0.0223553	1.65062
Isocitrate dehydrogenase [NAD] subunit alpha, mitochondrial OS=Homo sapiens GN=IDH3A PE=1 SV=1	IDH3A_HUMAN	393 kDa	1.9148	0.94875	1.8762	1.57992	5.1482	2.2539	2.0794	3.1605	0.499895	-1.0003	0.204605	0.689083
ATP synthase subunit gamma, mitochondrial OS=Homo sapiens GN=ATP5C1 PE=1 SV=1	ATPG_HUMAN	824 kDa	7.6592	3.795	4.6905	5.38157	7.2075	12.396	12.477	10.6935	0.503256	-0.990636	0.0645481	1.19012
ATP-binding cassette sub-family D member 3 OS=Homo sapiens GN=ABCD3 PE=1 SV=1	ABCD3_HUMAN	835 kDa	4.787	3.795	8.4428	5.67493	14.415	7.8886	11.437	11.2469	0.504579	-0.986848	0.0773318	1.11164
Mitochondrial dicarboxylate carrier OS=Homo sapiens GN=SLC25A10 PE=1 SV=2	DIC_HUMAN	867 kDa	5.7444	4.7437	8.4428	6.3103	11.326	12.396	13.516	12.4127	0.508376	-0.976033	0.00868392	2.06128
Dipeptidase 1 OS=Homo sapiens GN=DPEP1 PE=1 SV=3	DPEP1_HUMAN	315 kDa	0	2.8462	0.93809	1.26143	3.0889	2.2539	2.0794	2.47407	0.509861	-0.971824	0.246232	0.608656
Eukaryotic translation initiation factor 3 subunit B OS=Homo sapiens GN=EIF3B PE=1 SV=3	EIF3B_HUMAN	967 kDa	10.531	9.4875	9.3809	9.7998	21.623	15.777	19.755	19.0517	0.51438	-0.959093	0.00629972	2.20068
Inorganic pyrophosphatase 2, mitochondrial OS=Homo sapiens GN=PPA2 PE=1 SV=2	IPYR2_HUMAN	522 kDa	2.8722	1.8975	1.8762	2.2153	3.0889	5.6347	4.1588	4.29413	0.51589	-0.954865	0.0617591	1.2093
Ubiquitin carboxyl-terminal hydrolase isozyme L3 OS=Homo sapiens GN=UCHL3 PE=1 SV=1	UCHL3_HUMAN	508 kDa	1.9148	1.8975	2.8143	2.20887	4.1186	4.5078	4.1588	4.26173	0.518302	-0.948134	0.00328721	2.48317
Pyruvate dehydrogenase E1 component subunit alpha, somatic form, mitochondrial OS=Homo sapiens GN=PDHA1 PE=1 SV=3	ODPA_HUMAN	505 kDa	2.8722	2.8462	0.93809	2.21883	5.1482	4.5078	3.1191	4.25837	0.521052	-0.940501	0.0805959	1.09369
Cytochrome b-c1 complex subunit 6, mitochondrial OS=Homo sapiens GN=UQCRH PE=1 SV=2	QCR6_HUMAN	953 kDa	7.6592	11.385	9.3809	9.47503	14.415	21.412	18.715	18.1807	0.52116	-0.940202	0.019472	1.71059
Coatomer subunit delta OS=Homo sapiens GN=ARCN1 PE=1 SV=1	COPD_HUMAN	738 kDa	3.8296	5.6925	3.7524	4.42483	9.2668	6.7616	9.3574	8.46193	0.52291	-0.935364	0.0190214	1.72076
Protein disulfide-isomerase A5 OS=Homo sapiens GN=PDIA5 PE=1 SV=1	PDIA5_HUMAN	243 kDa	1.9148	0.94875	0	0.954517	1.0296	3.3808	1.0397	1.8167	0.525412	-0.928478	0.418873	0.377918
Tyrosine--tRNA ligase, cytoplasmic OS=Homo sapiens GN=YARS PE=1 SV=4	SYYC_HUMAN	804 kDa	4.787	6.6412	4.6905	5.3729	11.326	7.8886	11.437	10.2172	0.525868	-0.927227	0.021733	1.66288
Cluster of Endoplasmin OS=Homo sapiens GN=HSP90B1 PE=1 SV=1 (ENPL_HUMAN)	ENPL_HUMAN [2]	1218 kDa	139.78	128.08	166.98	144.947	263.59	283.99	276.56	274.713	0.527629	-0.922405	0.000561442	3.25069
Pyrroline-5-carboxylate reductase 1, mitochondrial OS=Homo sapiens GN=PYCR1 PE=1 SV=2	P5CR1_HUMAN	1053 kDa	14.361	14.231	16.886	15.1593	29.86	32.681	22.874	28.4717	0.532436	-0.909321	0.0118876	1.92491
Long-chain-fatty-acid--CoA ligase 5 OS=Homo sapiens GN=ACSL5 PE=1 SV=1	ACSL5_HUMAN	208 kDa	0	0	2.8143	0.9381	2.0593	1.1269	2.0794	1.7552	0.534469	-0.903822	0.455263	0.341738
Aconitate hydratase, mitochondrial OS=Homo sapiens GN=ACO2 PE=1 SV=2	ACON_HUMAN	928 kDa	11.489	7.59	6.5666	8.54853	17.504	14.65	15.596	15.9167	0.537081	-0.896789	0.0127718	1.89375
26S proteasome non-ATPase regulatory subunit 7 OS=Homo sapiens GN=PSMD7 PE=1 SV=2	PSD7_HUMAN	441 kDa	1.9148	3.795	0	1.90327	4.1186	3.3808	3.1191	3.5395	0.537722	-0.895068	0.223086	0.651528
Cytochrome c OS=Homo sapiens GN=CYCS PE=1 SV=2	CYC_HUMAN	962 kDa	10.531	8.5387	11.257	10.1089	16.474	16.904	22.874	18.7507	0.539122	-0.891316	0.0176373	1.75357
Aspartyl/asparaginyl beta-hydroxylase OS=Homo sapiens GN=ASPH PE=1 SV=3	ASPH_HUMAN	219 kDa	0.9574	0.94875	0.93809	0.94808	1.0296	1.1269	3.1191	1.75853	0.539131	-0.891292	0.299745	0.523248
E3 ubiquitin/ISG15 ligase TRIM25 OS=Homo sapiens GN=TRIM25 PE=1 SV=2	TRI25_HUMAN	545 kDa	0.9574	2.8462	3.7524	2.51867	4.1186	6.7616	3.1191	4.66643	0.539741	-0.88966	0.190275	0.720619
Proteasome-associated protein ECM29 homolog OS=Homo sapiens GN=ECM29 PE=1 SV=2	ECM29_HUMAN	546 kDa	1.9148	2.8462	2.8143	2.5251	4.1186	6.7616	3.1191	4.66643	0.54112	-0.88598	0.130656	0.883871
Cluster of Band 4.1-like protein 2 OS=Homo sapiens GN=EPB41L2 PE=1 SV=1 (E41L2_HUMAN)	E41L2_HUMAN	634 kDa	2.8722	3.795	3.7524	3.4732	7.2075	6.7616	5.1986	6.38923	0.543602	-0.879377	0.0127177	1.89559
Coatomer subunit gamma-1 OS=Homo sapiens GN=COPG1 PE=1 SV=1	COPG1_HUMAN	1009 kDa	11.489	14.231	13.133	12.951	22.652	24.793	23.913	23.786	0.54448	-0.877049	0.000428542	3.36801
DNA-dependent protein kinase catalytic subunit OS=Homo sapiens GN=PRKDC PE=1 SV=3	PRKDC_HUMAN	1143 kDa	29.679	30.36	26.267	28.7687	54.571	51.839	51.986	52.7987	0.544875	-0.876003	0.000100036	3.99984
Signal recognition particle 72 kDa protein OS=Homo sapiens GN=SRP72 PE=1 SV=3	SRP72_HUMAN	629 kDa	2.8722	2.8462	4.6905	3.46963	7.2075	5.6347	6.2383	6.36017	0.545526	-0.874281	0.0193159	1.71409
Acyl-protein thioesterase 1 OS=Homo sapiens GN=LYPLA1 PE=1 SV=1	LYPA1_HUMAN	199 kDa	0.9574	0	1.8762	0.944533	2.0593	0	3.1191	1.72613	0.547196	-0.86987	0.503291	0.298181
D-3-phosphoglycerate dehydrogenase OS=Homo sapiens GN=PHGDH PE=1 SV=4	SERA_HUMAN	1123 kDa	23.935	29.411	20.638	24.6613	44.275	50.712	39.509	44.832	0.550083	-0.862278	0.00815871	2.08838
Probable serine carboxypeptidase CPVL OS=Homo sapiens GN=CPVL PE=1 SV=2	CPVL_HUMAN	526 kDa	1.9148	0.94875	4.6905	2.51802	6.1779	3.3808	4.1588	4.5725	0.550687	-0.860695	0.215426	0.666703
Phosphoserine phosphatase OS=Homo sapiens GN=PSPH PE=1 SV=2	SERB_HUMAN	812 kDa	3.8296	7.59	5.6286	5.68273	8.2372	11.269	11.437	10.3144	0.550951	-0.860003	0.0369018	1.43295
Abhydrolase domain-containing protein 14B OS=Homo sapiens GN=ABHD14B PE=1 SV=1	ABHEB_HUMAN	747 kDa	3.8296	5.6925	4.6905	4.73753	8.2372	10.142	7.278	8.5524	0.553942	-0.852193	0.0188035	1.72576
Peroxiredoxin-5, mitochondrial OS=Homo sapiens GN=PRDX5 PE=1 SV=4	PRDX5_HUMAN	1054 kDa	17.233	15.18	15.948	16.1203	28.83	27.046	31.191	29.0223	0.555446	-0.848282	0.00065348	3.18477
Threonine--tRNA ligase, cytoplasmic OS=Homo sapiens GN=TARS PE=1 SV=3	SYTC_HUMAN	843 kDa	7.6592	5.6925	5.6286	6.32677	8.2372	12.396	13.516	11.3831	0.555805	-0.847349	0.0437566	1.35896
Homogentisate 1,2-dioxygenase OS=Homo sapiens GN=HGD PE=1 SV=2	HGD_HUMAN	604 kDa	2.8722	3.795	2.8143	3.1605	6.1779	5.6347	5.1986	5.6704	0.557368	-0.843298	0.00413695	2.38332
Cytochrome c oxidase subunit 5A, mitochondrial OS=Homo sapiens GN=COX5A PE=1 SV=2	COX5A_HUMAN	899 kDa	9.574	3.795	10.319	7.896	15.445	13.523	13.516	14.1613	0.557575	-0.842763	0.0440516	1.35604
Stomatin-like protein 2 OS=Homo sapiens GN=STOML2 PE=1 SV=1	STML2_HUMAN	898 kDa	8.6166	8.5387	6.5666	7.9073	13.385	12.396	16.635	14.1387	0.559268	-0.838389	0.0125357	1.90185
Stress-70 protein, mitochondrial OS=Homo sapiens GN=HSPA9 PE=1 SV=2	GRP75_HUMAN	1195 kDa	62.231	62.617	70.357	65.0683	106.05	120.58	119.57	115.4	0.56385	-0.826616	0.000727061	3.13843
Cytochrome b-c1 complex subunit 1, mitochondrial OS=Homo sapiens GN=UQCRC1 PE=1 SV=3	QCR1_HUMAN	956 kDa	8.6166	12.334	10.319	10.4232	15.445	19.158	20.794	18.4657	0.564464	-0.825047	0.0136436	1.86507
Tumor protein D54 OS=Homo sapiens GN=TPD52L2 PE=1 SV=2	TPD54_HUMAN	760 kDa	3.8296	5.6925	5.6286	5.05023	8.2372	11.269	7.278	8.92807	0.565658	-0.821998	0.0452473	1.34441
Dynamin-like 120 kDa protein, mitochondrial OS=Homo sapiens GN=OPA1 PE=1 SV=3	OPA1_HUMAN	485 kDa	2.8722	1.8975	1.8762	2.2153	5.1482	4.5078	2.0794	3.9118	0.566312	-0.820331	0.161985	0.790526
Nucleolar GTP-binding protein 1 OS=Homo sapiens GN=GTPBP4 PE=1 SV=3	NOG1_HUMAN	481 kDa	0.9574	2.8462	2.8143	2.20597	4.1186	3.3808	4.1588	3.88607	0.567661	-0.8169	0.0671882	1.17271
Heat shock 70 kDa protein 1A/1B OS=Homo sapiens GN=HSPA1A PE=1 SV=5	HSP71_HUMAN	1206 kDa	77.55	83.49	79.738	80.2593	115.32	170.17	138.28	141.257	0.568181	-0.815578	0.0188942	1.72367
Prenylcysteine oxidase 1 OS=Homo sapiens GN=PCYOX1 PE=1 SV=3	PCYOX_HUMAN	569 kDa	4.787	2.8462	0.93809	2.8571	4.1186	6.7616	4.1588	5.013	0.569937	-0.811124	0.201993	0.694663
Thioredoxin-related transmembrane protein 1 OS=Homo sapiens GN=TMX1 PE=1 SV=1	TMX1_HUMAN	482 kDa	1.9148	3.795	0.93809	2.21596	4.1186	3.3808	4.1588	3.88607	0.570233	-0.810377	0.129157	0.888882
Bifunctional coenzyme A synthase OS=Homo sapiens GN=COASY PE=1 SV=4	COASY_HUMAN	478 kDa	2.8722	1.8975	1.8762	2.2153	5.1482	3.3808	3.1191	3.8827	0.570557	-0.809558	0.0806284	1.09351
Superoxide dismutase [Mn], mitochondrial OS=Homo sapiens GN=SOD2 PE=1 SV=2	SODM_HUMAN	1158 kDa	39.254	41.745	35.648	38.8823	71.046	57.474	75.899	68.1397	0.570627	-0.80938	0.00721927	2.14151
Ubiquinone biosynthesis protein COQ9, mitochondrial OS=Homo sapiens GN=COQ9 PE=1 SV=1	COQ9_HUMAN	137 kDa	0	0	1.8762	0.6254	1.0296	2.2539	0	1.0945	0.571402	-0.807421	0.630862	0.200065
Protein RCC2 OS=Homo sapiens GN=RCC2 PE=1 SV=2	RCC2_HUMAN	476 kDa	0.9574	4.7437	0.93809	2.21306	8.2372	3.3808	0	3.87267	0.571457	-0.807283	0.572668	0.242097
4-aminobutyrate aminotransferase, mitochondrial OS=Homo sapiens GN=ABAT PE=1 SV=3	GABT_HUMAN	870 kDa	5.7444	7.59	8.4428	7.25907	11.326	10.142	16.635	12.701	0.571535	-0.807086	0.0645411	1.19016
28S ribosomal protein S22, mitochondrial OS=Homo sapiens GN=MRPS22 PE=1 SV=1	RT22_HUMAN	470 kDa	2.8722	0	3.7524	2.2082	5.1482	2.2539	4.1588	3.85363	0.573018	-0.803348	0.309823	0.508886
Dihydrolipoyllysine-residue succinyltransferase component of 2-oxoglutarate dehydrogenase complex, mitochondrial OS=Homo sapiens GN=DLST PE=1 SV=4	ODO2_HUMAN	555 kDa	2.8722	3.795	1.8762	2.8478	6.1779	4.5078	4.1588	4.94817	0.575526	-0.797046	0.0654185	1.1843
Elongation factor Tu, mitochondrial OS=Homo sapiens GN=TUFM PE=1 SV=2	EFTU_HUMAN	1125 kDa	26.807	27.514	25.329	26.55	53.542	43.951	40.549	46.014	0.576998	-0.793361	0.00783659	2.10587
60S ribosomal protein L26 OS=Homo sapiens GN=RPL26 PE=1 SV=1	RL26_HUMAN	680 kDa	3.8296	3.795	4.6905	4.10503	8.2372	7.8886	5.1986	7.10813	0.577512	-0.792077	0.0402624	1.3951
Protein NipSnap homolog 1 OS=Homo sapiens GN=NIPSNAP1 PE=1 SV=1	NIPS1_HUMAN	1064 kDa	20.105	15.18	17.824	17.703	26.771	30.427	34.311	30.503	0.580369	-0.784957	0.00792028	2.10126
Cluster of Glucosamine--fructose-6-phosphate aminotransferase [isomerizing] 1 OS=Homo sapiens GN=GFPT1 PE=1 SV=3 (GFPT1_HUMAN)	GFPT1_HUMAN [2]	1073 kDa	18.191	21.821	17.824	19.2787	30.889	38.316	30.152	33.119	0.582103	-0.780654	0.00885043	2.05304
Protein arginine N-methyltransferase 5 OS=Homo sapiens GN=PRMT5 PE=1 SV=4	ANM5_HUMAN	292 kDa	0.9574	0.94875	1.8762	1.26078	1.0296	3.3808	2.0794	2.16327	0.582815	-0.778891	0.293203	0.532831
26S proteasome non-ATPase regulatory subunit 4 OS=Homo sapiens GN=PSMD4 PE=1 SV=1	PSMD4_HUMAN	424 kDa	1.9148	1.8975	1.8762	1.89617	2.0593	4.5078	3.1191	3.22873	0.587279	-0.767883	0.133371	0.874939
3-ketoacyl-CoA thiolase, mitochondrial OS=Homo sapiens GN=ACAA2 PE=1 SV=2	THIM_HUMAN	722 kDa	5.7444	3.795	4.6905	4.7433	9.2668	3.3808	11.437	8.0282	0.59083	-0.759185	0.254591	0.594157
Eukaryotic translation initiation factor 2 subunit 2 OS=Homo sapiens GN=EIF2S2 PE=1 SV=2	IF2B_HUMAN	416 kDa	1.9148	0.94875	2.8143	1.89262	2.0593	3.3808	4.1588	3.19963	0.59151	-0.757524	0.184425	0.734181
Actin-related protein 2/3 complex subunit 5 OS=Homo sapiens GN=ARPC5 PE=1 SV=3	ARPC5_HUMAN	134 kDa	0	1.8975	0	0.6325	1.0296	1.1269	1.0397	1.0654	0.593674	-0.752258	0.531766	0.27428
Alpha-aminoadipic semialdehyde dehydrogenase OS=Homo sapiens GN=ALDH7A1 PE=1 SV=5	AL7A1_HUMAN	514 kDa	3.8296	1.8975	1.8762	2.53443	3.0889	4.5078	5.1986	4.2651	0.594226	-0.750916	0.125976	0.899711
Mitochondrial fission 1 protein OS=Homo sapiens GN=FIS1 PE=1 SV=2	FIS1_HUMAN	269 kDa	1.9148	0.94875	0.93809	1.26721	2.0593	2.2539	2.0794	2.13087	0.594694	-0.749781	0.0588053	1.23058
ATP synthase subunit b, mitochondrial OS=Homo sapiens GN=ATP5F1 PE=1 SV=2	AT5F1_HUMAN	926 kDa	8.6166	7.59	12.195	9.4672	16.474	13.523	17.675	15.8907	0.595771	-0.74717	0.0260916	1.5835
Echinoderm microtubule-associated protein-like 4 OS=Homo sapiens GN=EML4 PE=1 SV=3	EMAL4_HUMAN	1114 kDa	25.85	22.77	28.143	25.5877	37.067	46.204	44.708	42.6597	0.599809	-0.737424	0.00614323	2.2116
40S ribosomal protein S2 OS=Homo sapiens GN=RPS2 PE=1 SV=2	RS2_HUMAN	1131 kDa	33.509	28.462	23.452	28.4743	33.978	55.22	53.025	47.4077	0.600627	-0.735458	0.0614291	1.21163
DBIRD complex subunit ZNF326 OS=Homo sapiens GN=ZNF326 PE=1 SV=2	ZN326_HUMAN	66 kDa	0	0	1.8762	0.6254	2.0593	0	1.0397	1.033	0.605421	-0.723989	0.661273	0.179619
Lactoylglutathione lyase OS=Homo sapiens GN=GLO1 PE=1 SV=4	LGUL_HUMAN	961 kDa	10.531	9.4875	14.071	11.3632	20.593	15.777	19.755	18.7083	0.607385	-0.719316	0.0224748	1.6483
Eukaryotic translation elongation factor 1 epsilon-1 OS=Homo sapiens GN=EEF1E1 PE=1 SV=1	MCA3_HUMAN	20 kDa	0	0	1.8762	0.6254	3.0889	0	0	1.02963	0.607401	-0.71928	0.754071	0.122588
Actin-related protein 2/3 complex subunit 3 OS=Homo sapiens GN=ARPC3 PE=1 SV=3	ARPC3_HUMAN	392 kDa	1.9148	1.8975	1.8762	1.89617	0	0	9.3574	3.11913	0.607915	-0.718059	0.714991	0.1457
CAAX prenyl protease 1 homolog OS=Homo sapiens GN=ZMPSTE24 PE=1 SV=2	FACE1_HUMAN	497 kDa	1.9148	0	5.6286	2.51447	7.2075	0	5.1986	4.13537	0.60804	-0.717763	0.581919	0.235138
Vacuolar protein sorting-associated protein 35 OS=Homo sapiens GN=VPS35 PE=1 SV=2	VPS35_HUMAN	709 kDa	4.787	2.8462	6.5666	4.73327	9.2668	6.7616	7.278	7.7688	0.609266	-0.714856	0.0826697	1.08265
Coatomer subunit epsilon OS=Homo sapiens GN=COPE PE=1 SV=3	COPE_HUMAN	614 kDa	3.8296	4.7437	1.8762	3.48317	5.1482	6.7616	5.1986	5.7028	0.610782	-0.711271	0.0901673	1.04495
Small nuclear ribonucleoprotein Sm D1 OS=Homo sapiens GN=SNRPD1 PE=1 SV=1	SMD1_HUMAN	813 kDa	4.787	6.6412	7.5047	6.31097	7.2075	11.269	12.477	10.3178	0.611656	-0.709207	0.0880428	1.05531
LETM1 and EF-hand domain-containing protein 1, mitochondrial OS=Homo sapiens GN=LETM1 PE=1 SV=1	LETM1_HUMAN	600 kDa	1.9148	3.795	4.6905	3.46677	7.2075	5.6347	4.1588	5.667	0.611746	-0.708994	0.141044	0.850646
Phosphoserine aminotransferase OS=Homo sapiens GN=PSAT1 PE=1 SV=2	SERC_HUMAN	1047 kDa	11.489	21.821	17.824	17.0447	22.652	33.808	27.033	27.831	0.612435	-0.707372	0.0713824	1.14641
Filamin-A OS=Homo sapiens GN=FLNA PE=1 SV=4	FLNA_HUMAN	1159 kDa	40.211	38.899	46.905	42.005	68.986	66.489	69.661	68.3787	0.6143	-0.702985	0.000581065	3.23578
Voltage-dependent anion-selective channel protein 2 OS=Homo sapiens GN=VDAC2 PE=1 SV=2	VDAC2_HUMAN	983 kDa	13.404	11.385	13.133	12.6407	16.474	19.158	25.993	20.5417	0.615367	-0.700481	0.0529175	1.2764
BAG family molecular chaperone regulator 3 OS=Homo sapiens GN=BAG3 PE=1 SV=3	BAG3_HUMAN	62 kDa	1.9148	0	0	0.638267	1.0296	0	2.0794	1.03633	0.615889	-0.699257	0.673165	0.171878
Copine-1 OS=Homo sapiens GN=CPNE1 PE=1 SV=1	CPNE1_HUMAN	536 kDa	2.8722	2.8462	2.8143	2.84423	4.1186	4.5078	5.1986	4.60833	0.617193	-0.696205	0.00506254	2.29563
Aldehyde dehydrogenase X, mitochondrial OS=Homo sapiens GN=ALDH1B1 PE=1 SV=3	AL1B1_HUMAN	1154 kDa	40.211	34.155	41.276	38.5473	61.779	64.235	61.343	62.4523	0.617228	-0.696124	0.000564575	3.24828
Proteasome subunit beta type-6 OS=Homo sapiens GN=PSMB6 PE=1 SV=4	PSB6_HUMAN	458 kDa	1.9148	1.8975	2.8143	2.20887	4.1186	4.5078	2.0794	3.5686	0.618973	-0.692052	0.169176	0.771662
Proactivator polypeptide OS=Homo sapiens GN=PSAP PE=1 SV=2	SAP_HUMAN	932 kDa	7.6592	11.385	11.257	10.1004	14.415	14.65	19.755	16.2733	0.620672	-0.688097	0.0440529	1.35603
39S ribosomal protein L4, mitochondrial OS=Homo sapiens GN=MRPL4 PE=1 SV=1	RM04_HUMAN	455 kDa	2.8722	1.8975	1.8762	2.2153	5.1482	4.5078	1.0397	3.56523	0.621362	-0.686494	0.363569	0.439413
Heme oxygenase 1 OS=Homo sapiens GN=HMOX1 PE=1 SV=1	HMOX1_HUMAN	682 kDa	3.8296	4.7437	4.6905	4.42127	7.2075	7.8886	6.2383	7.11147	0.62171	-0.685687	0.00878856	2.05608
Leukocyte elastase inhibitor OS=Homo sapiens GN=SERPINB1 PE=1 SV=1	ILEU_HUMAN	452 kDa	1.9148	2.8462	1.8762	2.2124	2.0593	3.3808	5.1986	3.54623	0.623873	-0.680675	0.238537	0.622444
26S proteasome non-ATPase regulatory subunit 13 OS=Homo sapiens GN=PSMD13 PE=1 SV=2	PSD13_HUMAN	884 kDa	9.574	9.4875	5.6286	8.23003	13.385	15.777	10.397	13.1863	0.624134	-0.680073	0.0709434	1.14909
3-mercaptopyruvate sulfurtransferase OS=Homo sapiens GN=MPST PE=1 SV=3	THTM_HUMAN	789 kDa	6.7018	5.6925	5.6286	6.00763	10.296	10.142	8.3177	9.58523	0.626759	-0.674017	0.0078158	2.10703
NADPH:adrenodoxin oxidoreductase, mitochondrial OS=Homo sapiens GN=FDXR PE=1 SV=3	ADRO_HUMAN	1108 kDa	28.722	25.616	21.576	25.3047	39.127	38.316	43.668	40.3703	0.626813	-0.673892	0.00476378	2.32205
GDP-mannose 4,6 dehydratase OS=Homo sapiens GN=GMDS PE=1 SV=1	GMDS_HUMAN	434 kDa	1.9148	2.8462	1.8762	2.2124	3.0889	2.2539	5.1986	3.5138	0.629632	-0.66742	0.235038	0.628862
Cluster of ADP-ribosylation factor 1 OS=Homo sapiens GN=ARF1 PE=1 SV=2 (ARF1_HUMAN)	ARF1_HUMAN [3]	1045 kDa	14.361	20.872	16.886	17.373	25.741	24.793	32.231	27.5883	0.629723	-0.667211	0.0274121	1.56206
ATP synthase subunit beta, mitochondrial OS=Homo sapiens GN=ATP5B PE=1 SV=3	ATPB_HUMAN	1217 kDa	165.63	172.67	157.6	165.3	254.32	255.81	276.56	262.23	0.630363	-0.665746	0.000321348	3.49302
Heterogeneous nuclear ribonucleoproteins C1/C2 OS=Homo sapiens GN=HNRNPC PE=1 SV=4	HNRPC_HUMAN	1091 kDa	28.722	21.821	20.638	23.727	36.038	37.189	39.509	37.5787	0.631395	-0.663384	0.00701517	2.15396
Isocitrate dehydrogenase [NADP] cytoplasmic OS=Homo sapiens GN=IDH1 PE=1 SV=2	IDHC_HUMAN	1177 kDa	48.828	61.669	51.595	54.0307	82.372	89.028	85.256	85.552	0.631554	-0.663023	0.0019281	2.71487
Actin-related protein 2/3 complex subunit 4 OS=Homo sapiens GN=ARPC4 PE=1 SV=3	ARPC4_HUMAN	346 kDa	1.9148	1.8975	0.93809	1.58346	2.0593	3.3808	2.0794	2.5065	0.631743	-0.662591	0.16462	0.783518
60S ribosomal protein L23a OS=Homo sapiens GN=RPL23A PE=1 SV=1	RL23A_HUMAN	917 kDa	8.6166	9.4875	10.319	9.47437	13.385	18.031	13.516	14.9773	0.63258	-0.660679	0.0265393	1.57611
Synaptic vesicle membrane protein VAT-1 homolog OS=Homo sapiens GN=VAT1 PE=1 SV=2	VAT1_HUMAN	429 kDa	1.9148	1.8975	2.8143	2.20887	4.1186	1.1269	5.1986	3.48137	0.634483	-0.656347	0.367917	0.43425
Secernin-1 OS=Homo sapiens GN=SCRN1 PE=1 SV=2	SCRN1_HUMAN	316 kDa	0	1.8975	2.8143	1.5706	3.0889	2.2539	2.0794	2.47407	0.634825	-0.655569	0.365188	0.437483
Ribosome maturation protein SBDS OS=Homo sapiens GN=SBDS PE=1 SV=4	SBDS_HUMAN	317 kDa	0	2.8462	1.8762	1.57413	3.0889	2.2539	2.0794	2.47407	0.636253	-0.652327	0.3699	0.431916
Probable hydrolase PNKD OS=Homo sapiens GN=PNKD PE=1 SV=2	PNKD_HUMAN	329 kDa	1.9148	0.94875	1.8762	1.57992	2.0593	2.2539	3.1191	2.47743	0.637723	-0.648998	0.11902	0.924379
Long-chain-fatty-acid--CoA ligase 1 OS=Homo sapiens GN=ACSL1 PE=1 SV=1	ACSL1_HUMAN	318 kDa	1.9148	0.94875	1.8762	1.57992	3.0889	2.2539	2.0794	2.47407	0.638591	-0.647036	0.114045	0.942923
Aspartate aminotransferase, mitochondrial OS=Homo sapiens GN=GOT2 PE=1 SV=3	AATM_HUMAN	1070 kDa	21.063	18.026	22.514	20.5343	33.978	28.173	34.311	32.154	0.638625	-0.64696	0.00828799	2.08155
Lysosome-associated membrane glycoprotein 2 OS=Homo sapiens GN=LAMP2 PE=1 SV=2	LAMP2_HUMAN	330 kDa	1.9148	1.8975	0.93809	1.58346	2.0593	2.2539	3.1191	2.47743	0.639155	-0.645763	0.123002	0.910088
Vesicular integral-membrane protein VIP36 OS=Homo sapiens GN=LMAN2 PE=1 SV=1	LMAN2_HUMAN	558 kDa	4.787	1.8975	2.8143	3.16627	5.1482	4.5078	5.1986	4.95153	0.639452	-0.645093	0.112674	0.948174
Nucleolar protein 58 OS=Homo sapiens GN=NOP58 PE=1 SV=1	NOP58_HUMAN	863 kDa	7.6592	8.5387	7.5047	7.90087	16.474	10.142	10.397	12.3377	0.640386	-0.642987	0.101521	0.993443
26S proteasome non-ATPase regulatory subunit 3 OS=Homo sapiens GN=PSMD3 PE=1 SV=2	PSMD3_HUMAN	875 kDa	7.6592	9.4875	7.5047	8.21713	11.326	14.65	12.477	12.8177	0.641079	-0.641427	0.0167913	1.77491
TAR DNA-binding protein 43 OS=Homo sapiens GN=TARDBP PE=1 SV=1	TADBP_HUMAN	796 kDa	6.7018	4.7437	7.5047	6.31673	8.2372	5.6347	15.596	9.82263	0.643079	-0.636931	0.320404	0.494302
Endoplasmic reticulum resident protein 29 OS=Homo sapiens GN=ERP29 PE=1 SV=4	ERP29_HUMAN	810 kDa	5.7444	6.6412	7.5047	6.6301	10.296	10.142	10.397	10.2783	0.645056	-0.632504	0.00207444	2.6831
39S ribosomal protein L3, mitochondrial OS=Homo sapiens GN=MRPL3 PE=1 SV=1	RM03_HUMAN	303 kDa	2.8722	0	1.8762	1.5828	4.1186	1.1269	2.0794	2.44163	0.648255	-0.625368	0.520177	0.283849
Cluster of Serine/threonine-protein phosphatase PP1-alpha catalytic subunit OS=Homo sapiens GN=PPP1CA PE=1 SV=1 (PP1A_HUMAN)	PP1A_HUMAN [2]	1028 kDa	17.233	14.231	18.762	16.742	26.771	23.666	27.033	25.8233	0.648328	-0.625203	0.00610352	2.21442
Cytochrome b-c1 complex subunit 2, mitochondrial OS=Homo sapiens GN=UQCRC2 PE=1 SV=3	QCR2_HUMAN	941 kDa	8.6166	11.385	13.133	11.0449	16.474	16.904	17.675	17.0177	0.649024	-0.623657	0.0117945	1.92832
Emerin OS=Homo sapiens GN=EMD PE=1 SV=1	EMD_HUMAN	187 kDa	0	0	2.8143	0.9381	1.0296	2.2539	1.0397	1.44107	0.650976	-0.619323	0.648519	0.188077
Dihydrolipoyllysine-residue acetyltransferase component of pyruvate dehydrogenase complex, mitochondrial OS=Homo sapiens GN=DLAT PE=1 SV=3	ODP2_HUMAN	479 kDa	2.8722	2.8462	1.8762	2.53153	5.1482	3.3808	3.1191	3.8827	0.652003	-0.617049	0.132429	0.878016
Importin subunit beta-1 OS=Homo sapiens GN=KPNB1 PE=1 SV=2	IMB1_HUMAN	1132 kDa	32.552	30.36	30.019	30.977	42.215	46.204	54.065	47.4947	0.652221	-0.616568	0.00983519	2.00722
Chloride intracellular channel protein 1 OS=Homo sapiens GN=CLIC1 PE=1 SV=4	CLIC1_HUMAN	1127 kDa	29.679	34.155	27.205	30.3463	38.097	57.474	43.668	46.413	0.653833	-0.613007	0.0581635	1.23535
Neutral amino acid transporter B(0) OS=Homo sapiens GN=SLC1A5 PE=1 SV=2	AAAT_HUMAN	473 kDa	3.8296	3.795	0	2.54153	4.1186	2.2539	5.1986	3.85703	0.658935	-0.601792	0.439612	0.35693
Peroxiredoxin-6 OS=Homo sapiens GN=PRDX6 PE=1 SV=3	PRDX6_HUMAN	1128 kDa	26.807	35.104	30.957	30.956	39.127	51.839	49.906	46.9573	0.659237	-0.601131	0.025797	1.58843
Amine oxidase [flavin-containing] B OS=Homo sapiens GN=MAOB PE=1 SV=3	AOFB_HUMAN	616 kDa	4.787	3.795	2.8143	3.79877	3.0889	7.8886	6.2383	5.7386	0.661967	-0.595168	0.270601	0.56767
Trifunctional enzyme subunit alpha, mitochondrial OS=Homo sapiens GN=HADHA PE=1 SV=2	ECHA_HUMAN	1197 kDa	83.294	83.49	83.49	83.4247	122.53	122.84	132.04	125.803	0.663136	-0.592624	0.000170143	3.76919
Voltage-dependent anion-selective channel protein 1 OS=Homo sapiens GN=VDAC1 PE=1 SV=2	VDAC1_HUMAN	1145 kDa	38.296	36.052	32.833	35.727	53.542	52.966	55.105	53.871	0.663195	-0.592494	0.000445906	3.35076
Bcl-2-associated transcription factor 1 OS=Homo sapiens GN=BCLAF1 PE=1 SV=2	BCLF1_HUMAN	518 kDa	2.8722	2.8462	2.8143	2.84423	5.1482	5.6347	2.0794	4.28743	0.663388	-0.592074	0.264501	0.577573
NAD-dependent malic enzyme, mitochondrial OS=Homo sapiens GN=ME2 PE=1 SV=1	MAOM_HUMAN	515 kDa	2.8722	2.8462	2.8143	2.84423	3.0889	4.5078	5.1986	4.2651	0.666862	-0.58454	0.0841129	1.07514
Peroxisomal multifunctional enzyme type 2 OS=Homo sapiens GN=HSD17B4 PE=1 SV=3	DHB4_HUMAN	1087 kDa	24.892	24.667	23.452	24.337	35.008	45.077	29.112	36.399	0.668617	-0.580747	0.0615812	1.21055
Aspartate aminotransferase, cytoplasmic OS=Homo sapiens GN=GOT1 PE=1 SV=3	AATC_HUMAN	1092 kDa	21.063	27.514	27.205	25.2607	31.919	42.824	38.469	37.7373	0.669381	-0.5791	0.0304599	1.51627
Basigin OS=Homo sapiens GN=BSG PE=1 SV=2	BASI_HUMAN	948 kDa	10.531	8.5387	15.948	11.6726	13.385	18.031	20.794	17.4033	0.670709	-0.576242	0.137646	0.861237
Coiled-coil domain-containing protein 47 OS=Homo sapiens GN=CCDC47 PE=1 SV=1	CCD47_HUMAN	375 kDa	1.9148	1.8975	1.8762	1.89617	2.0593	2.2539	4.1588	2.824	0.671447	-0.574654	0.238252	0.622963
ATP synthase subunit alpha, mitochondrial OS=Homo sapiens GN=ATP5A1 PE=1 SV=1	ATPA_HUMAN	1205 kDa	98.613	85.387	96.624	93.5413	134.88	123.96	158.04	138.96	0.673153	-0.570994	0.0138861	1.85742
14-3-3 protein beta/alpha OS=Homo sapiens GN=YWHAB PE=1 SV=3	1433B_HUMAN	1142 kDa	36.381	34.155	35.648	35.3947	55.601	52.966	48.866	52.4777	0.674471	-0.568172	0.00116751	2.93274
Isoleucine--tRNA ligase, mitochondrial OS=Homo sapiens GN=IARS2 PE=1 SV=2	SYIM_HUMAN	811 kDa	9.574	3.795	7.5047	6.9579	13.385	11.269	6.2383	10.2974	0.675693	-0.565561	0.285487	0.544413
Transmembrane emp24 domain-containing protein 10 OS=Homo sapiens GN=TMED10 PE=1 SV=2	TMEDA_HUMAN	1015 kDa	15.318	18.026	15.948	16.4307	16.474	15.777	40.549	24.2667	0.677088	-0.562585	0.392581	0.406071
Non-POU domain-containing octamer-binding protein OS=Homo sapiens GN=NONO PE=1 SV=4	NONO_HUMAN	999 kDa	14.361	13.282	17.824	15.1557	22.652	21.412	22.874	22.3127	0.67924	-0.558006	0.00771815	2.11249
Cluster of Spectrin beta chain, non-erythrocytic 1 OS=Homo sapiens GN=SPTBN1 PE=1 SV=2 (SPTB2_HUMAN)	SPTB2_HUMAN [2]	1208 kDa	103.4	109.11	90.995	101.168	145.18	162.28	139.32	148.927	0.679316	-0.557844	0.00540875	2.2669
Eukaryotic translation initiation factor 6 OS=Homo sapiens GN=EIF6 PE=1 SV=1	IF6_HUMAN	1014 kDa	17.233	17.077	15.009	16.4397	18.534	25.92	28.072	24.1753	0.680018	-0.556355	0.0600821	1.22125
Surfeit locus protein 4 OS=Homo sapiens GN=SURF4 PE=1 SV=3	SURF4_HUMAN	1007 kDa	18.191	17.077	12.195	15.821	17.504	13.523	38.469	23.1653	0.68296	-0.550127	0.408066	0.389269
Cluster of Scaffold attachment factor B2 OS=Homo sapiens GN=SAFB2 PE=1 SV=1 (SAFB2_HUMAN)	SAFB2_HUMAN [2]	541 kDa	3.8296	2.8462	2.8143	3.16337	6.1779	5.6347	2.0794	4.63067	0.683134	-0.549759	0.331108	0.480031
60 kDa heat shock protein, mitochondrial OS=Homo sapiens GN=HSPD1 PE=1 SV=2	CH60_HUMAN	1227 kDa	490.19	493.35	512.2	498.58	728.99	714.48	740.28	727.917	0.684941	-0.545948	2.26986e-05	4.644
Complement component 1 Q subcomponent-binding protein, mitochondrial OS=Homo sapiens GN=C1QBP PE=1 SV=1	C1QBP_HUMAN	1021 kDa	18.191	17.077	16.886	17.3847	23.682	25.92	25.993	25.1983	0.689913	-0.535513	0.000816291	3.08816
Mitochondrial inner membrane protein OS=Homo sapiens GN=IMMT PE=1 SV=1	IMMT_HUMAN	1011 kDa	18.191	18.026	13.133	16.45	23.682	25.92	21.834	23.812	0.690828	-0.533601	0.0224654	1.64849
60S ribosomal protein L14 OS=Homo sapiens GN=RPL14 PE=1 SV=4	RL14_HUMAN	831 kDa	10.531	7.59	4.6905	7.60383	9.2668	11.269	12.477	11.0043	0.69099	-0.533264	0.15263	0.816359
Glutathione S-transferase kappa 1 OS=Homo sapiens GN=GSTK1 PE=1 SV=3	GSTK1_HUMAN	714 kDa	6.7018	3.795	5.6286	5.37513	7.2075	6.7616	9.3574	7.7755	0.691291	-0.532635	0.108882	0.963044
NAD(P)H-hydrate epimerase OS=Homo sapiens GN=APOA1BP PE=1 SV=2	NNRE_HUMAN	417 kDa	2.8722	1.8975	1.8762	2.2153	2.0593	3.3808	4.1588	3.19963	0.692361	-0.530405	0.229799	0.638652
6-phosphofructokinase, liver type OS=Homo sapiens GN=PFKL PE=1 SV=6	K6PL_HUMAN	873 kDa	7.6592	9.4875	9.3809	8.84253	11.326	12.396	14.556	12.7593	0.693025	-0.529021	0.02493	1.60328
Tropomodulin-3 OS=Homo sapiens GN=TMOD3 PE=1 SV=1	TMOD3_HUMAN	152 kDa	2.8722	0	0	0.9574	2.0593	0	2.0794	1.37957	0.693986	-0.527021	0.738601	0.13159
Tropomyosin alpha-1 chain OS=Homo sapiens GN=TPM1 PE=1 SV=2	TPM1_HUMAN	927 kDa	12.446	8.5387	12.195	11.0599	15.445	13.523	18.715	15.8943	0.695839	-0.523174	0.0703874	1.15251
Nucleolin OS=Homo sapiens GN=NCL PE=1 SV=3	NUCL_HUMAN	1211 kDa	123.5	131.88	107.88	121.087	156.51	189.33	174.67	173.503	0.697892	-0.518923	0.0113602	1.94461
60S ribosomal protein L21 OS=Homo sapiens GN=RPL21 PE=1 SV=2	RL21_HUMAN	838 kDa	8.6166	8.5387	6.5666	7.9073	12.356	10.142	11.437	11.3117	0.699039	-0.516554	0.0214636	1.6683
Eukaryotic translation initiation factor 4 gamma 2 OS=Homo sapiens GN=EIF4G2 PE=1 SV=1	IF4G2_HUMAN	724 kDa	3.8296	6.6412	6.5666	5.67913	9.2668	6.7616	8.3177	8.11537	0.6998	-0.514985	0.10757	0.96831
Aspartate--tRNA ligase, cytoplasmic OS=Homo sapiens GN=DARS PE=1 SV=2	SYDC_HUMAN	852 kDa	6.7018	12.334	5.6286	8.22147	14.415	13.523	7.278	11.7387	0.700375	-0.513801	0.314467	0.502425
26S protease regulatory subunit 8 OS=Homo sapiens GN=PSMC5 PE=1 SV=1	PRS8_HUMAN	844 kDa	3.8296	11.385	9.3809	8.1985	15.445	10.142	9.3574	11.6481	0.703847	-0.506667	0.308614	0.510584
Vasodilator-stimulated phosphoprotein OS=Homo sapiens GN=VASP PE=1 SV=3	VASP_HUMAN	237 kDa	0.9574	0.94875	1.8762	1.26078	0	2.2539	3.1191	1.791	0.703955	-0.506445	0.616955	0.209747
Mitochondrial carrier homolog 2 OS=Homo sapiens GN=MTCH2 PE=1 SV=1	MTCH2_HUMAN	981 kDa	14.361	10.436	17.824	14.207	22.652	19.158	18.715	20.175	0.704188	-0.505967	0.0731229	1.13595
Actin-related protein 2/3 complex subunit 1B OS=Homo sapiens GN=ARPC1B PE=1 SV=3	ARC1B_HUMAN	809 kDa	6.7018	7.59	7.5047	7.2655	11.326	10.142	9.3574	10.2751	0.707095	-0.500023	0.00920499	2.03598
Hydroxyacyl-coenzyme A dehydrogenase, mitochondrial OS=Homo sapiens GN=HADH PE=1 SV=3	HCDH_HUMAN	551 kDa	4.787	1.8975	3.7524	3.47897	6.1779	3.3808	5.1986	4.9191	0.707236	-0.499736	0.28836	0.540065
Heterogeneous nuclear ribonucleoprotein A0 OS=Homo sapiens GN=HNRNPA0 PE=1 SV=1	ROA0_HUMAN	459 kDa	1.9148	2.8462	2.8143	2.5251	4.1186	4.5078	2.0794	3.5686	0.707588	-0.499018	0.268402	0.571214
Sulfide:quinone oxidoreductase, mitochondrial OS=Homo sapiens GN=SQRDL PE=1 SV=1	SQRD_HUMAN	453 kDa	0.9574	1.8975	4.6905	2.51513	2.0593	3.3808	5.1986	3.54623	0.709241	-0.495653	0.514615	0.288518
Protein disulfide-isomerase A6 OS=Homo sapiens GN=PDIA6 PE=1 SV=1	PDIA6_HUMAN	1191 kDa	74.677	74.951	69.419	73.0157	96.787	119.46	92.534	102.927	0.709393	-0.495344	0.0249215	1.60343
Heterogeneous nuclear ribonucleoprotein A1 OS=Homo sapiens GN=HNRNPA1 PE=1 SV=5	ROA1_HUMAN	1169 kDa	61.274	55.027	51.595	55.9653	79.283	64.235	92.534	78.684	0.711267	-0.491537	0.0584365	1.23332
UV excision repair protein RAD23 homolog B OS=Homo sapiens GN=RAD23B PE=1 SV=1	RD23B_HUMAN	454 kDa	3.8296	0	3.7524	2.52733	2.0593	3.3808	5.1986	3.54623	0.712681	-0.488672	0.548667	0.260691
Glucosidase 2 subunit beta OS=Homo sapiens GN=PRKCSH PE=1 SV=2	GLU2B_HUMAN	950 kDa	13.404	11.385	13.133	12.6407	18.534	18.031	16.635	17.7333	0.71282	-0.488391	0.00390765	2.40808
ADP-ribosylation factor-like protein 1 OS=Homo sapiens GN=ARL1 PE=1 SV=1	ARL1_HUMAN	438 kDa	2.8722	1.8975	2.8143	2.528	5.1482	3.3808	2.0794	3.53613	0.714905	-0.484176	0.345559	0.461477
Cluster of Spliceosome RNA helicase DDX39B OS=Homo sapiens GN=DDX39B PE=1 SV=1 (DX39B_HUMAN)	DX39B_HUMAN [2]	1104 kDa	33.509	24.667	27.205	28.4603	35.008	41.697	42.628	39.7777	0.715485	-0.483006	0.0335467	1.47435
Protein ERGIC-53 OS=Homo sapiens GN=LMAN1 PE=1 SV=2	LMAN1_HUMAN	952 kDa	11.489	17.077	10.319	12.9617	17.504	16.904	19.755	18.0543	0.717926	-0.478094	0.0871787	1.05959
Protein disulfide-isomerase A4 OS=Homo sapiens GN=PDIA4 PE=1 SV=2	PDIA4_HUMAN	1164 kDa	56.487	50.284	54.409	53.7267	78.253	73.251	71.74	74.4147	0.72199	-0.469949	0.00152165	2.81768
Cluster of Ezrin OS=Homo sapiens GN=EZR PE=1 SV=4 (EZRI_HUMAN)	EZRI_HUMAN [2]	1034 kDa	21.063	18.026	17.824	18.971	30.889	23.666	23.913	26.156	0.725302	-0.463346	0.0500636	1.30048
Heat shock protein 105 kDa OS=Homo sapiens GN=HSPH1 PE=1 SV=1	HS105_HUMAN	888 kDa	9.574	10.436	9.3809	9.79697	13.385	14.65	12.477	13.504	0.725486	-0.46298	0.00637988	2.19519
Epiplakin OS=Homo sapiens GN=EPPK1 PE=1 SV=2	EPIPL_HUMAN	200 kDa	0.9574	0	2.8143	1.25723	2.0593	0	3.1191	1.72613	0.728352	-0.457291	0.72312	0.14079
ATP synthase subunit g, mitochondrial OS=Homo sapiens GN=ATP5L PE=1 SV=3	ATP5L_HUMAN	595 kDa	4.787	3.795	3.7524	4.11147	6.1779	4.5078	6.2383	5.64133	0.728811	-0.456383	0.0813561	1.08961
Heterogeneous nuclear ribonucleoprotein U OS=Homo sapiens GN=HNRNPU PE=1 SV=6	HNRPU_HUMAN	1150 kDa	39.254	46.489	46.905	44.216	63.838	58.601	59.264	60.5677	0.730026	-0.453979	0.00537309	2.26978
Cluster of Acidic leucine-rich nuclear phosphoprotein 32 family member A OS=Homo sapiens GN=ANP32A PE=1 SV=1 (AN32A_HUMAN)	AN32A_HUMAN [2]	801 kDa	7.6592	7.59	6.5666	7.27193	7.2075	10.142	12.477	9.94217	0.731423	-0.451221	0.163128	0.78747
Methionine--tRNA ligase, cytoplasmic OS=Homo sapiens GN=MARS PE=1 SV=2	SYMC_HUMAN	886 kDa	11.489	8.5387	9.3809	9.80287	18.534	11.269	10.397	13.4	0.731557	-0.450957	0.257214	0.589706
TATA-binding protein-associated factor 2N OS=Homo sapiens GN=TAF15 PE=1 SV=1	RBP56_HUMAN	646 kDa	4.787	3.795	5.6286	4.73687	7.2075	9.0155	3.1191	6.44737	0.734698	-0.444777	0.401169	0.396673
Transformer-2 protein homolog beta OS=Homo sapiens GN=TRA2B PE=1 SV=1	TRA2B_HUMAN	474 kDa	2.8722	1.8975	3.7524	2.8407	4.1186	2.2539	5.1986	3.85703	0.736499	-0.441245	0.372597	0.428761
Signal recognition particle 14 kDa protein OS=Homo sapiens GN=SRP14 PE=1 SV=2	SRP14_HUMAN	707 kDa	6.7018	3.795	6.5666	5.6878	6.1779	4.5078	12.477	7.7209	0.736676	-0.440898	0.478686	0.31995
WD repeat-containing protein 1 OS=Homo sapiens GN=WDR1 PE=1 SV=4	WDR1_HUMAN	1018 kDa	19.148	19.924	15.948	18.34	24.711	25.92	23.913	24.848	0.738088	-0.438136	0.00850581	2.07028
Annexin A6 OS=Homo sapiens GN=ANXA6 PE=1 SV=3	ANXA6_HUMAN	1133 kDa	32.552	37.95	34.709	35.0703	46.334	47.331	48.866	47.5103	0.738162	-0.43799	0.00199445	2.70018
Septin-9 OS=Homo sapiens GN=SEPT9 PE=1 SV=2	SEPT9_HUMAN	591 kDa	3.8296	5.6925	2.8143	4.11213	3.0889	1.1269	12.477	5.56427	0.739025	-0.436305	0.707493	0.150278
ATPase ASNA1 OS=Homo sapiens GN=ASNA1 PE=1 SV=2	ASNA_HUMAN	264 kDa	0	1.8975	2.8143	1.5706	4.1186	2.2539	0	2.12417	0.739396	-0.435581	0.722172	0.141359
40S ribosomal protein S15a OS=Homo sapiens GN=RPS15A PE=1 SV=2	RS15A_HUMAN	1003 kDa	19.148	15.18	15.948	16.7587	19.563	20.285	28.072	22.64	0.740224	-0.433967	0.11992	0.92111
Proteasome subunit beta type-1 OS=Homo sapiens GN=PSMB1 PE=1 SV=2	PSB1_HUMAN	806 kDa	8.6166	7.59	6.5666	7.59107	12.356	9.0155	9.3574	10.243	0.7411	-0.432259	0.0944623	1.02474
Cytochrome c oxidase subunit 2 OS=Homo sapiens GN=MT-CO2 PE=1 SV=1	COX2_HUMAN	922 kDa	13.404	10.436	10.319	11.3863	12.356	15.777	17.675	15.2693	0.745699	-0.423334	0.104443	0.981121
ATP synthase subunit d, mitochondrial OS=Homo sapiens GN=ATP5H PE=1 SV=3	ATP5H_HUMAN	978 kDa	14.361	15.18	15.009	14.85	17.504	18.031	23.913	19.816	0.749394	-0.416203	0.0743623	1.12865
60S ribosomal protein L32 OS=Homo sapiens GN=RPL32 PE=1 SV=2	RL32_HUMAN	906 kDa	11.489	9.4875	11.257	10.7445	12.356	5.6347	24.953	14.3146	0.750599	-0.413886	0.564886	0.248039
RuvB-like 1 OS=Homo sapiens GN=RUVBL1 PE=1 SV=1	RUVB1_HUMAN	774 kDa	6.7018	7.59	6.5666	6.9528	9.2668	10.142	8.3177	9.24217	0.752291	-0.410637	0.0206305	1.68549
Myosin regulatory light chain 12A OS=Homo sapiens GN=MYL12A PE=1 SV=2	ML12A_HUMAN (+1)	904 kDa	13.404	7.59	11.257	10.7503	12.356	18.031	12.477	14.288	0.752403	-0.410423	0.234087	0.630623
H/ACA ribonucleoprotein complex subunit 4 OS=Homo sapiens GN=DKC1 PE=1 SV=3	DKC1_HUMAN	840 kDa	9.574	7.59	8.4428	8.5356	12.356	11.269	10.397	11.3407	0.752654	-0.409941	0.0254472	1.59436
BolA-like protein 2 OS=Homo sapiens GN=BOLA2 PE=1 SV=1	BOLA2_HUMAN	769 kDa	5.7444	8.5387	6.5666	6.9499	11.326	9.0155	7.278	9.2065	0.754891	-0.405661	0.191172	0.718576
Reticulocalbin-1 OS=Homo sapiens GN=RCN1 PE=1 SV=1	RCN1_HUMAN	683 kDa	5.7444	4.7437	5.6286	5.37223	7.2075	7.8886	6.2383	7.11147	0.755433	-0.404625	0.0387216	1.41205
39S ribosomal protein L49, mitochondrial OS=Homo sapiens GN=MRPL49 PE=1 SV=1	RM49_HUMAN	347 kDa	1.9148	1.8975	1.8762	1.89617	2.0593	3.3808	2.0794	2.5065	0.7565	-0.402588	0.235325	0.628332
Cluster of Guanine nucleotide-binding protein G(I)/G(S)/G(T) subunit beta-1 OS=Homo sapiens GN=GNB1 PE=1 SV=3 (GBB1_HUMAN)	GBB1_HUMAN	572 kDa	3.8296	5.6925	1.8762	3.79943	2.0593	6.7616	6.2383	5.01973	0.756899	-0.401826	0.545835	0.262939
Calreticulin OS=Homo sapiens GN=CALR PE=1 SV=1	CALR_HUMAN	1202 kDa	104.36	100.57	106	103.643	143.12	123.96	143.48	136.853	0.757331	-0.401003	0.00750234	2.1248
Sialic acid synthase OS=Homo sapiens GN=NANS PE=1 SV=2	SIAS_HUMAN	846 kDa	5.7444	10.436	10.319	8.83313	13.385	10.142	11.437	11.6547	0.757905	-0.399911	0.193947	0.712317
Heterogeneous nuclear ribonucleoprotein D-like OS=Homo sapiens GN=HNRPDL PE=1 SV=3	HNRDL_HUMAN	891 kDa	13.404	9.4875	8.4428	10.4448	14.415	10.142	16.635	13.7307	0.760689	-0.394621	0.247889	0.605743
Mitogen-activated protein kinase 1 OS=Homo sapiens GN=MAPK1 PE=1 SV=3	MK01_HUMAN	590 kDa	4.787	2.8462	4.6905	4.1079	3.0889	7.8886	5.1986	5.39203	0.761846	-0.392428	0.44736	0.349343
Quinone oxidoreductase OS=Homo sapiens GN=CRYZ PE=1 SV=1	QOR_HUMAN	834 kDa	10.531	9.4875	5.6286	8.54903	14.415	6.7616	12.477	11.2179	0.762091	-0.391965	0.384995	0.414545
Microtubule-associated protein 4 OS=Homo sapiens GN=MAP4 PE=1 SV=3	MAP4_HUMAN	814 kDa	5.7444	7.59	10.319	7.88447	11.326	12.396	7.278	10.3333	0.763013	-0.390221	0.297861	0.525987
14-3-3 protein zeta/delta OS=Homo sapiens GN=YWHAZ PE=1 SV=1	1433Z_HUMAN	1156 kDa	50.742	52.181	46.905	49.9427	68.986	72.124	55.105	65.405	0.763591	-0.389128	0.0472773	1.32535
F-box only protein 2 OS=Homo sapiens GN=FBXO2 PE=1 SV=2	FBX2_HUMAN	946 kDa	13.404	12.334	14.071	13.2697	19.563	16.904	15.596	17.3543	0.764631	-0.387164	0.0325538	1.4874
NADH dehydrogenase [ubiquinone] 1 alpha subcomplex subunit 13 OS=Homo sapiens GN=NDUFA13 PE=1 SV=3	NDUAD_HUMAN	331 kDa	1.9148	1.8975	1.8762	1.89617	2.0593	2.2539	3.1191	2.47743	0.765375	-0.38576	0.149067	0.826617
Cluster of Kinesin-1 heavy chain OS=Homo sapiens GN=KIF5B PE=1 SV=1 (KINH_HUMAN)	KINH_HUMAN [3]	556 kDa	0.9574	7.59	2.8143	3.78723	6.1779	4.5078	4.1588	4.94817	0.765381	-0.38575	0.605076	0.21819
60S ribosomal protein L18a OS=Homo sapiens GN=RPL18A PE=1 SV=2	RL18A_HUMAN	798 kDa	8.6166	5.6925	8.4428	7.58397	11.326	9.0155	9.3574	9.89963	0.766086	-0.384422	0.123454	0.908495
Signal recognition particle receptor subunit beta OS=Homo sapiens GN=SRPRB PE=1 SV=3	SRPRB_HUMAN	387 kDa	1.9148	1.8975	2.8143	2.20887	2.0593	4.5078	2.0794	2.88217	0.766391	-0.383847	0.480951	0.317899
Isovaleryl-CoA dehydrogenase, mitochondrial OS=Homo sapiens GN=IVD PE=1 SV=1	IVD_HUMAN	319 kDa	1.9148	1.8975	1.8762	1.89617	3.0889	2.2539	2.0794	2.47407	0.766417	-0.383799	0.137363	0.862131
6-phosphogluconolactonase OS=Homo sapiens GN=PGLS PE=1 SV=2	6PGL_HUMAN	320 kDa	1.9148	1.8975	1.8762	1.89617	3.0889	2.2539	2.0794	2.47407	0.766417	-0.383799	0.137363	0.862131
Sulfotransferase 1A1 OS=Homo sapiens GN=SULT1A1 PE=1 SV=3	ST1A1_HUMAN	1079 kDa	24.892	25.616	29.081	26.5297	38.097	28.173	37.43	34.5667	0.767493	-0.381775	0.0805083	1.09416
CD59 glycoprotein OS=Homo sapiens GN=CD59 PE=1 SV=1	CD59_HUMAN	587 kDa	3.8296	5.6925	2.8143	4.11213	5.1482	6.7616	4.1588	5.3562	0.767733	-0.381323	0.334174	0.476027
Valine--tRNA ligase OS=Homo sapiens GN=VARS PE=1 SV=4	SYVC_HUMAN	931 kDa	10.531	13.282	13.133	12.3153	16.474	18.031	13.516	16.007	0.769372	-0.378247	0.0819142	1.08664
Isocitrate dehydrogenase [NADP], mitochondrial OS=Homo sapiens GN=IDH2 PE=1 SV=2	IDHP_HUMAN	1111 kDa	28.722	33.206	31.895	31.2743	44.275	34.935	42.628	40.6127	0.770064	-0.376951	0.042192	1.37477
U1 small nuclear ribonucleoprotein C OS=Homo sapiens GN=SNRPC PE=1 SV=1	RU1C_HUMAN	332 kDa	3.8296	1.8975	0	1.90903	2.0593	2.2539	3.1191	2.47743	0.770569	-0.376004	0.647731	0.188605
Coatomer subunit beta OS=Homo sapiens GN=COPB1 PE=1 SV=3	COPB_HUMAN	971 kDa	12.446	13.282	18.762	14.83	18.534	21.412	17.675	19.207	0.772114	-0.373114	0.127364	0.894953
S-formylglutathione hydrolase OS=Homo sapiens GN=ESD PE=1 SV=2	ESTD_HUMAN	691 kDa	4.787	6.6412	5.6286	5.6856	6.1779	1.1269	14.556	7.28693	0.780246	-0.357999	0.706112	0.151126
Eukaryotic translation initiation factor 5 OS=Homo sapiens GN=EIF5 PE=1 SV=2	IF5_HUMAN	366 kDa	0.9574	1.8975	3.7524	2.20243	3.0889	2.2539	3.1191	2.82063	0.780829	-0.356921	0.515986	0.287362
ATP-dependent RNA helicase DDX18 OS=Homo sapiens GN=DDX18 PE=1 SV=2	DDX18_HUMAN	296 kDa	0.9574	0	4.6905	1.88263	5.1482	0	2.0794	2.4092	0.781435	-0.355802	0.811709	0.0905996
Protein disulfide-isomerase A3 OS=Homo sapiens GN=PDIA3 PE=1 SV=4	PDIA3_HUMAN	1209 kDa	121.59	139.47	128.52	129.86	153.42	170.17	173.63	165.74	0.783516	-0.351965	0.011552	1.93734
Cluster of Eukaryotic initiation factor 4A-I OS=Homo sapiens GN=EIF4A1 PE=1 SV=1 (IF4A1_HUMAN)	IF4A1_HUMAN [2]	1180 kDa	68.933	77.797	60.976	69.2353	82.372	94.663	87.336	88.1237	0.785661	-0.348021	0.0350822	1.45491
Arginine--tRNA ligase, cytoplasmic OS=Homo sapiens GN=RARS PE=1 SV=2	SYRC_HUMAN	914 kDa	11.489	12.334	11.257	11.6933	17.504	14.65	12.477	14.877	0.786001	-0.347397	0.0997677	1.00101
Lysosomal alpha-glucosidase OS=Homo sapiens GN=GAA PE=1 SV=4	LYAG_HUMAN	792 kDa	5.7444	6.6412	10.319	7.5682	10.296	11.269	7.278	9.61433	0.787179	-0.345237	0.329497	0.482148
Peptidyl-prolyl cis-trans isomerase B OS=Homo sapiens GN=PPIB PE=1 SV=2	PPIB_HUMAN	1153 kDa	51.7	47.437	46.905	48.6807	56.63	65.362	63.422	61.8047	0.787654	-0.344367	0.0126348	1.89843
Nuclear migration protein nudC OS=Homo sapiens GN=NUDC PE=1 SV=1	NUDC_HUMAN	885 kDa	10.531	10.436	10.319	10.4287	11.326	15.777	12.477	13.1933	0.79045	-0.339254	0.107174	0.969912
Translationally-controlled tumor protein OS=Homo sapiens GN=TPT1 PE=1 SV=1	TCTP_HUMAN	637 kDa	6.7018	3.795	4.6905	5.06243	6.1779	6.7616	6.2383	6.3926	0.791921	-0.336572	0.204861	0.68854
Sepiapterin reductase OS=Homo sapiens GN=SPR PE=1 SV=1	SPRE_HUMAN	864 kDa	10.531	9.4875	9.3809	9.7998	11.326	10.142	15.596	12.3547	0.793206	-0.334232	0.206532	0.685013
Casein kinase II subunit alpha OS=Homo sapiens GN=CSNK2A1 PE=1 SV=1	CSK21_HUMAN	762 kDa	6.7018	6.6412	8.4428	7.26193	12.356	6.7616	8.3177	9.1451	0.794079	-0.332645	0.346998	0.459673
Spectrin alpha chain, non-erythrocytic 1 OS=Homo sapiens GN=SPTAN1 PE=1 SV=3	SPTN1_HUMAN	1188 kDa	79.464	81.592	74.109	78.3883	96.787	103.68	95.654	98.707	0.794152	-0.332513	0.00374531	2.42651
Nicotinamide phosphoribosyltransferase OS=Homo sapiens GN=NAMPT PE=1 SV=1	NAMPT_HUMAN	496 kDa	0.9574	1.8975	6.5666	3.1405	1.0296	5.6347	5.1986	3.9543	0.794199	-0.332428	0.738319	0.131756
D-dopachrome decarboxylase OS=Homo sapiens GN=DDT PE=1 SV=3	DOPD_HUMAN	781 kDa	8.6166	5.6925	8.4428	7.58397	13.385	7.8886	7.278	9.5172	0.79687	-0.327585	0.421477	0.375227
Cluster of RNA-binding motif protein, X chromosome OS=Homo sapiens GN=RBMX PE=1 SV=3 (RBMX_HUMAN)	RBMX_HUMAN [2]	763 kDa	10.531	6.6412	4.6905	7.28757	12.356	6.7616	8.3177	9.1451	0.796882	-0.327562	0.480946	0.317903
Calnexin OS=Homo sapiens GN=CANX PE=1 SV=2	CALX_HUMAN	1174 kDa	63.189	69.259	67.543	66.6637	76.194	77.759	96.693	83.5487	0.797902	-0.325716	0.0688095	1.16235
Glutathione reductase, mitochondrial OS=Homo sapiens GN=GSR PE=1 SV=2	GSHR_HUMAN	918 kDa	11.489	12.334	12.195	12.006	12.356	20.285	12.477	15.0393	0.798307	-0.324985	0.313965	0.503119
Biliverdin reductase A OS=Homo sapiens GN=BLVRA PE=1 SV=2	BIEA_HUMAN	448 kDa	2.8722	2.8462	2.8143	2.84423	3.0889	3.3808	4.1588	3.54283	0.802813	-0.316864	0.0942281	1.02582
Prelamin-A/C OS=Homo sapiens GN=LMNA PE=1 SV=1	LMNA_HUMAN	1140 kDa	49.785	37.001	38.462	41.7493	48.393	58.601	48.866	51.9533	0.803593	-0.315463	0.122982	0.910158
Peroxisomal bifunctional enzyme OS=Homo sapiens GN=EHHADH PE=1 SV=3	ECHP_HUMAN	697 kDa	5.7444	5.6925	6.5666	6.00117	6.1779	7.8886	8.3177	7.4614	0.804295	-0.314203	0.109679	0.959876
Heterogeneous nuclear ribonucleoprotein A/B OS=Homo sapiens GN=HNRNPAB PE=1 SV=2	ROAA_HUMAN	651 kDa	6.7018	3.795	5.6286	5.37513	7.2075	4.5078	8.3177	6.67767	0.804942	-0.313044	0.409154	0.388113
Estradiol 17-beta-dehydrogenase 12 OS=Homo sapiens GN=HSD17B12 PE=1 SV=2	DHB12_HUMAN	719 kDa	4.787	6.6412	7.5047	6.31097	7.2075	9.0155	7.278	7.83367	0.805621	-0.311827	0.201101	0.696586
60S ribosomal protein L38 OS=Homo sapiens GN=RPL38 PE=1 SV=2	RL38_HUMAN	975 kDa	17.233	16.129	14.071	15.811	20.593	22.539	15.596	19.576	0.807673	-0.308157	0.171925	0.76466
40S ribosomal protein S8 OS=Homo sapiens GN=RPS8 PE=1 SV=2	RS8_HUMAN	998 kDa	15.318	22.77	15.948	18.012	21.623	20.285	24.953	22.287	0.808184	-0.307244	0.196354	0.70696
Electron transfer flavoprotein subunit beta OS=Homo sapiens GN=ETFB PE=1 SV=3	ETFB_HUMAN	1040 kDa	21.063	20.872	23.452	21.7957	27.8	27.046	25.993	26.9463	0.808855	-0.306048	0.00630856	2.20007
Inosine-5'-monophosphate dehydrogenase 2 OS=Homo sapiens GN=IMPDH2 PE=1 SV=2	IMDH2_HUMAN	1010 kDa	19.148	20.872	17.824	19.2813	24.711	25.92	20.794	23.8083	0.809856	-0.304262	0.0638576	1.19479
Heterogeneous nuclear ribonucleoprotein L OS=Homo sapiens GN=HNRNPL PE=1 SV=2	HNRPL_HUMAN	1081 kDa	26.807	32.257	27.205	28.7563	31.919	34.935	39.509	35.4543	0.811081	-0.302082	0.0762968	1.11749
Glyoxylate reductase/hydroxypyruvate reductase OS=Homo sapiens GN=GRHPR PE=1 SV=1	GRHPR_HUMAN	672 kDa	8.6166	2.8462	5.6286	5.69713	9.2668	4.5078	7.278	7.01753	0.811843	-0.300728	0.574613	0.240625
14-3-3 protein gamma OS=Homo sapiens GN=YWHAG PE=1 SV=2	1433G_HUMAN	1101 kDa	31.594	32.257	31.895	31.9153	45.304	38.316	34.311	39.3103	0.811882	-0.300659	0.0831094	1.08035
14-3-3 protein theta OS=Homo sapiens GN=YWHAQ PE=1 SV=1	1433T_HUMAN	1137 kDa	39.254	42.694	36.586	39.5113	52.512	49.585	43.668	48.5883	0.813186	-0.298343	0.0447405	1.3493
Cluster of Talin-1 OS=Homo sapiens GN=TLN1 PE=1 SV=3 (TLN1_HUMAN)	TLN1_HUMAN [2]	1093 kDa	31.594	27.514	33.771	30.9597	37.067	41.697	35.35	38.038	0.813914	-0.297051	0.0550089	1.25957
Pterin-4-alpha-carbinolamine dehydratase OS=Homo sapiens GN=PCBD1 PE=1 SV=2	PHS_HUMAN	866 kDa	10.531	10.436	9.3809	10.116	12.356	12.396	12.477	12.4097	0.815168	-0.29483	0.00345269	2.46184
Cluster of Ras-related protein Rab-10 OS=Homo sapiens GN=RAB10 PE=1 SV=1 (RAB10_HUMAN)	RAB10_HUMAN [6]	1112 kDa	35.424	35.104	30.019	33.5157	40.156	38.316	44.708	41.06	0.816261	-0.292898	0.0432334	1.36418
Insulin-like growth factor 2 mRNA-binding protein 3 OS=Homo sapiens GN=IGF2BP3 PE=1 SV=2	IF2B3_HUMAN	872 kDa	8.6166	9.4875	13.133	10.4124	14.415	12.396	11.437	12.7493	0.816699	-0.292124	0.226883	0.644198
Proteasome subunit alpha type-1 OS=Homo sapiens GN=PSMA1 PE=1 SV=1	PSA1_HUMAN	802 kDa	7.6592	8.5387	8.4428	8.21357	8.2372	14.65	7.278	10.0551	0.816858	-0.291842	0.473687	0.324509
Cullin-associated NEDD8-dissociated protein 1 OS=Homo sapiens GN=CAND1 PE=1 SV=2	CAND1_HUMAN	777 kDa	5.7444	8.5387	8.4428	7.5753	9.2668	11.269	7.278	9.27127	0.817073	-0.291463	0.313372	0.50394
Putative tropomyosin alpha-3 chain-like protein OS=Homo sapiens PE=5 SV=2	TPM3L_HUMAN	544 kDa	3.8296	3.795	3.7524	3.79233	3.0889	5.6347	5.1986	4.64073	0.817184	-0.291267	0.341361	0.466786
Cluster of Protein arginine N-methyltransferase 1 OS=Homo sapiens GN=PRMT1 PE=1 SV=2 (ANM1_HUMAN)	ANM1_HUMAN	775 kDa	6.7018	8.5387	7.5047	7.58173	10.296	11.269	6.2383	9.26777	0.818076	-0.289694	0.35932	0.444518
Adenine phosphoribosyltransferase OS=Homo sapiens GN=APRT PE=1 SV=2	APT_HUMAN	501 kDa	3.8296	2.8462	3.7524	3.47607	5.1482	3.3808	4.1588	4.22927	0.821908	-0.282952	0.278391	0.555345
40S ribosomal protein S23 OS=Homo sapiens GN=RPS23 PE=1 SV=3	RS23_HUMAN	537 kDa	5.7444	1.8975	3.7524	3.7981	4.1186	4.5078	5.1986	4.60833	0.824181	-0.278967	0.521575	0.282683
Cluster of Heterogeneous nuclear ribonucleoprotein H OS=Homo sapiens GN=HNRNPH1 PE=1 SV=4 (HNRH1_HUMAN)	HNRH1_HUMAN [2]	1151 kDa	54.572	53.13	43.152	50.2847	55.601	60.855	66.542	60.9993	0.824348	-0.278675	0.0885854	1.05264
ES1 protein homolog, mitochondrial OS=Homo sapiens GN=C21orf33 PE=1 SV=3	ES1_HUMAN	562 kDa	3.8296	3.795	4.6905	4.10503	6.1779	5.6347	3.1191	4.97723	0.824762	-0.27795	0.426644	0.369934
14-3-3 protein epsilon OS=Homo sapiens GN=YWHAE PE=1 SV=1	1433E_HUMAN	1175 kDa	62.231	77.797	69.419	69.8157	83.401	91.282	79.018	84.567	0.825566	-0.276544	0.0623858	1.20491
Glyoxalase domain-containing protein 4 OS=Homo sapiens GN=GLOD4 PE=1 SV=1	GLOD4_HUMAN	563 kDa	5.7444	1.8975	4.6905	4.1108	6.1779	5.6347	3.1191	4.97723	0.825921	-0.275925	0.590881	0.2285
39S ribosomal protein L12, mitochondrial OS=Homo sapiens GN=MRPL12 PE=1 SV=2	RM12_HUMAN	531 kDa	5.7444	3.795	1.8762	3.8052	5.1482	4.5078	4.1588	4.60493	0.826331	-0.275208	0.526314	0.278755
Peroxisomal acyl-coenzyme A oxidase 1 OS=Homo sapiens GN=ACOX1 PE=1 SV=3	ACOX1_HUMAN	1020 kDa	16.276	24.667	21.576	20.8397	22.652	24.793	28.072	25.1723	0.82788	-0.272507	0.211162	0.675385
Elongation factor 1-gamma OS=Homo sapiens GN=EEF1G PE=1 SV=3	EF1G_HUMAN	1118 kDa	38.296	38.899	31.895	36.3633	43.245	37.189	50.946	43.7933	0.830339	-0.268227	0.179178	0.746716
Prostaglandin E synthase 3 OS=Homo sapiens GN=PTGES3 PE=1 SV=1	TEBP_HUMAN	1029 kDa	21.063	19.924	23.452	21.4797	26.771	24.793	25.993	25.8523	0.83086	-0.267323	0.0211978	1.67371
Heterogeneous nuclear ribonucleoprotein D0 OS=Homo sapiens GN=HNRNPD PE=1 SV=1	HNRPD_HUMAN	996 kDa	20.105	17.077	16.886	18.0227	19.563	22.539	22.874	21.6587	0.832123	-0.265132	0.0701026	1.15427
3'(2'),5'-bisphosphate nucleotidase 1 OS=Homo sapiens GN=BPNT1 PE=1 SV=1	BPNT1_HUMAN	33 kDa	0	0	0.93809	0.312697	0	1.1269	0	0.375633	0.832452	-0.264561	0.903755	0.0439494
Thioredoxin reductase 1, cytoplasmic OS=Homo sapiens GN=TXNRD1 PE=1 SV=3	TRXR1_HUMAN	933 kDa	12.446	13.282	15.009	13.579	11.326	14.65	22.874	16.2833	0.83392	-0.262019	0.484492	0.314713
Transmembrane 9 superfamily member 2 OS=Homo sapiens GN=TM9SF2 PE=1 SV=1	TM9S2_HUMAN	576 kDa	4.787	5.6925	2.8143	4.43127	6.1779	4.5078	5.1986	5.29477	0.836914	-0.256848	0.427199	0.36937
Galectin-1 OS=Homo sapiens GN=LGALS1 PE=1 SV=2	LEG1_HUMAN	640 kDa	5.7444	5.6925	4.6905	5.3758	7.2075	7.8886	4.1588	6.4183	0.837574	-0.255712	0.432917	0.363595
60S ribosomal protein L13a OS=Homo sapiens GN=RPL13A PE=1 SV=2	RL13A_HUMAN	705 kDa	6.7018	6.6412	5.6286	6.32387	6.1779	11.269	5.1986	7.5485	0.837765	-0.255383	0.557	0.254145
General vesicular transport factor p115 OS=Homo sapiens GN=USO1 PE=1 SV=2	USO1_HUMAN	620 kDa	2.8722	4.7437	7.5047	5.0402	10.296	5.6347	2.0794	6.00337	0.839562	-0.252291	0.742325	0.129406
40S ribosomal protein S26 OS=Homo sapiens GN=RPS26 PE=1 SV=3	RS26_HUMAN	635 kDa	5.7444	2.8462	7.5047	5.3651	7.2075	6.7616	5.1986	6.38923	0.83971	-0.252038	0.529236	0.27635
Cluster of Nuclease-sensitive element-binding protein 1 OS=Homo sapiens GN=YBX1 PE=1 SV=3 (YBOX1_HUMAN)	YBOX1_HUMAN [2]	982 kDa	15.318	15.18	20.638	17.0453	19.563	10.142	31.191	20.2987	0.839727	-0.252008	0.635257	0.19705
Proteasome subunit beta type-5 OS=Homo sapiens GN=PSMB5 PE=1 SV=3	PSB5_HUMAN	598 kDa	5.7444	3.795	4.6905	4.7433	4.1186	4.5078	8.3177	5.64803	0.839814	-0.251857	0.567294	0.246192
DNA topoisomerase 1 OS=Homo sapiens GN=TOP1 PE=1 SV=2	TOP1_HUMAN	665 kDa	5.7444	4.7437	6.5666	5.6849	10.296	7.8886	2.0794	6.75467	0.841626	-0.24875	0.690183	0.161036
Adenylate kinase 2, mitochondrial OS=Homo sapiens GN=AK2 PE=1 SV=2	KAD2_HUMAN	882 kDa	12.446	9.4875	11.257	11.0635	10.296	13.523	15.596	13.1383	0.842078	-0.247974	0.305062	0.515612
Aminoacyl tRNA synthase complex-interacting multifunctional protein 1 OS=Homo sapiens GN=AIMP1 PE=1 SV=2	AIMP1_HUMAN	684 kDa	6.7018	5.6925	5.6286	6.00763	7.2075	7.8886	6.2383	7.11147	0.844781	-0.24335	0.135514	0.868015
60S ribosomal protein L9 OS=Homo sapiens GN=RPL9 PE=1 SV=1	RL9_HUMAN	895 kDa	14.361	10.436	10.319	11.7053	12.356	14.65	14.556	13.854	0.844906	-0.243137	0.231666	0.635137
Histone H2B type 1-M OS=Homo sapiens GN=HIST1H2BM PE=1 SV=3	H2B1M_HUMAN	1210 kDa	156.06	132.82	136.96	141.947	157.54	172.42	173.63	167.863	0.845609	-0.241938	0.0426145	1.37044
Cytoskeleton-associated protein 4 OS=Homo sapiens GN=CKAP4 PE=1 SV=2	CKAP4_HUMAN	977 kDa	19.148	14.231	16.886	16.755	19.563	18.031	21.834	19.8093	0.845813	-0.241589	0.164934	0.78269
Cluster of Clathrin heavy chain 1 OS=Homo sapiens GN=CLTC PE=1 SV=5 (CLH1_HUMAN)	CLH1_HUMAN [2]	1196 kDa	108.19	87.285	106.94	100.805	116.35	105.93	135.16	119.147	0.846058	-0.241171	0.167959	0.774797
Eukaryotic initiation factor 4A-III OS=Homo sapiens GN=EIF4A3 PE=1 SV=4	IF4A3_HUMAN	1065 kDa	25.85	29.411	22.514	25.925	27.8	33.808	30.152	30.5867	0.847592	-0.238559	0.153334	0.814362
Cluster of Actin, cytoplasmic 1 OS=Homo sapiens GN=ACTB PE=1 SV=1 (ACTB_HUMAN)	ACTB_HUMAN [5]	1228 kDa	645.29	666.02	608.82	640.043	723.84	789.98	750.67	754.83	0.84793	-0.237982	0.0107578	1.96828
Electron transfer flavoprotein subunit alpha, mitochondrial OS=Homo sapiens GN=ETFA PE=1 SV=1	ETFA_HUMAN	1059 kDa	26.807	26.565	22.514	25.2953	29.86	30.427	29.112	29.7997	0.848846	-0.236425	0.035516	1.44958
Ribosomal RNA-processing protein 8 OS=Homo sapiens GN=RRP8 PE=1 SV=2	RRP8_HUMAN	51 kDa	0.9574	0	0	0.319133	0	1.1269	0	0.375633	0.849587	-0.235166	0.914263	0.0389288
Ubiquitin-40S ribosomal protein S27a OS=Homo sapiens GN=RPS27A PE=1 SV=2	RS27A_HUMAN	1176 kDa	75.635	78.746	62.852	72.411	82.372	85.647	87.336	85.1183	0.85071	-0.233261	0.0665499	1.17685
Eukaryotic translation initiation factor 2 subunit 3 OS=Homo sapiens GN=EIF2S3 PE=1 SV=3	IF2G_HUMAN	913 kDa	12.446	13.282	12.195	12.641	15.445	13.523	15.596	14.8547	0.850978	-0.232806	0.0408904	1.38838
F-actin-capping protein subunit beta OS=Homo sapiens GN=CAPZB PE=1 SV=4	CAPZB_HUMAN	793 kDa	8.6166	8.5387	7.5047	8.22	7.2075	12.396	9.3574	9.65363	0.851493	-0.231934	0.406573	0.390862
ATP synthase subunit O, mitochondrial OS=Homo sapiens GN=ATP5O PE=1 SV=1	ATPO_HUMAN	942 kDa	16.276	14.231	13.133	14.5467	14.415	16.904	19.755	17.0247	0.854446	-0.226938	0.239925	0.619925
Leucine-rich repeat-containing protein 47 OS=Homo sapiens GN=LRRC47 PE=1 SV=1	LRC47_HUMAN	725 kDa	4.787	7.59	8.4428	6.93993	9.2668	6.7616	8.3177	8.11537	0.85516	-0.225734	0.424771	0.371845
Acidic leucine-rich nuclear phosphoprotein 32 family member B OS=Homo sapiens GN=ANP32B PE=1 SV=1	AN32B_HUMAN	790 kDa	10.531	6.6412	7.5047	8.22563	8.2372	10.142	10.397	9.59207	0.857545	-0.221715	0.372518	0.428853
DNA-(apurinic or apyrimidinic site) lyase OS=Homo sapiens GN=APEX1 PE=1 SV=2	APEX1_HUMAN	980 kDa	14.361	17.077	19.7	17.046	18.534	20.285	20.794	19.871	0.857833	-0.221231	0.169223	0.771541
Cluster of Tubulin alpha-1B chain OS=Homo sapiens GN=TUBA1B PE=1 SV=1 (TBA1B_HUMAN)	TBA1B_HUMAN [4]	1221 kDa	252.75	266.6	273.92	264.423	300.66	318.92	304.64	308.073	0.858313	-0.220424	0.00631954	2.19931
SRA stem-loop-interacting RNA-binding protein, mitochondrial OS=Homo sapiens GN=SLIRP PE=1 SV=1	SLIRP_HUMAN	799 kDa	8.6166	7.59	9.3809	8.52917	9.2668	9.0155	11.437	9.90643	0.860972	-0.215961	0.211707	0.674265
Putative histone H2B type 2-C OS=Homo sapiens GN=HIST2H2BC PE=5 SV=3	H2B2C_HUMAN (+1)	1063 kDa	27.765	29.411	21.576	26.2507	28.83	29.3	33.271	30.467	0.86161	-0.214893	0.202631	0.693295
26S protease regulatory subunit 10B OS=Homo sapiens GN=PSMC6 PE=1 SV=1	PRS10_HUMAN	782 kDa	9.574	6.6412	8.4428	8.21933	10.296	7.8886	10.397	9.5272	0.862723	-0.213031	0.331225	0.479877
Inositol 1,4,5-trisphosphate receptor type 3 OS=Homo sapiens GN=ITPR3 PE=1 SV=2	ITPR3_HUMAN	138 kDa	0.9574	0	1.8762	0.944533	1.0296	2.2539	0	1.0945	0.862982	-0.212598	0.868101	0.0614296
Tricarboxylate transport protein, mitochondrial OS=Homo sapiens GN=SLC25A1 PE=1 SV=2	TXTP_HUMAN	764 kDa	8.6166	8.5387	6.5666	7.9073	8.2372	6.7616	12.477	9.1586	0.863374	-0.211942	0.533717	0.272689
Actin-related protein 3 OS=Homo sapiens GN=ACTR3 PE=1 SV=3	ARP3_HUMAN	880 kDa	7.6592	15.18	11.257	11.3654	13.385	13.523	12.477	13.1283	0.865715	-0.208035	0.467157	0.330537
26S proteasome non-ATPase regulatory subunit 1 OS=Homo sapiens GN=PSMD1 PE=1 SV=2	PSMD1_HUMAN	859 kDa	12.446	9.4875	9.3809	10.4381	12.356	11.269	12.477	12.034	0.867387	-0.205253	0.211956	0.673755
Voltage-dependent anion-selective channel protein 3 OS=Homo sapiens GN=VDAC3 PE=1 SV=1	VDAC3_HUMAN	943 kDa	14.361	14.231	15.948	14.8467	16.474	20.285	14.556	17.105	0.867972	-0.204279	0.271463	0.56629
NAD(P)H dehydrogenase [quinone] 1 OS=Homo sapiens GN=NQO1 PE=1 SV=1	NQO1_HUMAN	1190 kDa	86.166	92.977	80.676	86.6063	105.02	102.55	91.495	99.6883	0.868771	-0.202952	0.0751299	1.12419
GTP-binding nuclear protein Ran OS=Homo sapiens GN=RAN PE=1 SV=3	RAN_HUMAN	1084 kDa	29.679	29.411	35.648	31.5793	39.127	36.062	33.271	36.1533	0.873483	-0.195148	0.159003	0.798596
Cluster of Adenylyl cyclase-associated protein 1 OS=Homo sapiens GN=CAP1 PE=1 SV=5 (CAP1_HUMAN)	CAP1_HUMAN [2]	877 kDa	11.489	14.231	8.4428	11.3876	16.474	10.142	12.477	13.031	0.873885	-0.194484	0.545701	0.263045
Casein kinase II subunit beta OS=Homo sapiens GN=CSNK2B PE=1 SV=1	CSK2B_HUMAN	177 kDa	0	1.8975	1.8762	1.2579	2.0593	2.2539	0	1.43773	0.874919	-0.192779	0.860069	0.0654668
X-ray repair cross-complementing protein 5 OS=Homo sapiens GN=XRCC5 PE=1 SV=3	XRCC5_HUMAN	1181 kDa	92.868	73.054	69.419	78.447	80.312	81.139	107.09	89.5137	0.876369	-0.19039	0.387333	0.411916
Cluster of Proteasome subunit alpha type-7 OS=Homo sapiens GN=PSMA7 PE=1 SV=1 (PSA7_HUMAN)	PSA7_HUMAN [2]	972 kDa	16.276	18.026	16.886	17.0627	20.593	16.904	20.794	19.4303	0.878146	-0.187468	0.157732	0.802081
Cluster of Filamin-B OS=Homo sapiens GN=FLNB PE=1 SV=2 (FLNB_HUMAN)	FLNB_HUMAN	1179 kDa	72.763	82.541	76.924	77.4093	83.401	86.774	93.574	87.9163	0.880489	-0.183624	0.0633008	1.19859
Cytoplasmic dynein 1 intermediate chain 2 OS=Homo sapiens GN=DYNC1I2 PE=1 SV=3	DC1I2_HUMAN	348 kDa	1.9148	1.8975	2.8143	2.20887	2.0593	3.3808	2.0794	2.5065	0.881255	-0.182368	0.605551	0.217849
Cluster of 40S ribosomal protein S10 OS=Homo sapiens GN=RPS10 PE=1 SV=1 (RS10_HUMAN)	RS10_HUMAN [2]	1055 kDa	25.85	23.719	27.205	25.5913	25.741	27.046	34.311	29.0327	0.881467	-0.182022	0.294119	0.531477
Protein disulfide-isomerase OS=Homo sapiens GN=P4HB PE=1 SV=3	PDIA1_HUMAN	1215 kDa	227.86	217.26	200.75	215.29	239.91	238.91	253.69	244.17	0.881722	-0.181605	0.0350746	1.45501
Hepatoma-derived growth factor OS=Homo sapiens GN=HDGF PE=1 SV=1	HDGF_HUMAN	493 kDa	5.7444	1.8975	2.8143	3.4854	4.1186	5.6347	2.0794	3.94423	0.88367	-0.178421	0.782132	0.10672
Cytosolic non-specific dipeptidase OS=Homo sapiens GN=CNDP2 PE=1 SV=2	CNDP2_HUMAN	825 kDa	10.531	5.6925	12.195	9.47283	10.296	13.523	8.3177	10.7122	0.884301	-0.177391	0.642283	0.192273
Replication protein A 70 kDa DNA-binding subunit OS=Homo sapiens GN=RPA1 PE=1 SV=2	RFA1_HUMAN	379 kDa	1.9148	1.8975	3.7524	2.52157	3.0889	3.3808	2.0794	2.8497	0.884853	-0.17649	0.676717	0.169593
Redox-regulatory protein FAM213A OS=Homo sapiens GN=FAM213A PE=1 SV=3	F213A_HUMAN	460 kDa	2.8722	3.795	2.8143	3.1605	4.1186	4.5078	2.0794	3.5686	0.885641	-0.175205	0.643764	0.191273
Leucine-rich PPR motif-containing protein, mitochondrial OS=Homo sapiens GN=LRPPRC PE=1 SV=3	LPPRC_HUMAN	1178 kDa	83.294	69.259	78.8	77.1177	91.638	81.139	88.376	87.051	0.885891	-0.174799	0.127172	0.895608
Phosphatidylethanolamine-binding protein 1 OS=Homo sapiens GN=PEBP1 PE=1 SV=3	PEBP1_HUMAN	1184 kDa	81.379	80.644	83.49	81.8377	87.52	98.044	91.495	92.353	0.88614	-0.174394	0.0298769	1.52466
Calcineurin-like phosphoesterase domain-containing protein 1 OS=Homo sapiens GN=CPPED1 PE=1 SV=3	CPPED_HUMAN	490 kDa	2.8722	3.795	3.7524	3.4732	3.0889	4.5078	4.1588	3.9185	0.88636	-0.174036	0.44183	0.354745
Regulation of nuclear pre-mRNA domain-containing protein 1B OS=Homo sapiens GN=RPRD1B PE=1 SV=1	RPR1B_HUMAN	225 kDa	2.8722	0	1.8762	1.5828	2.0593	2.2539	1.0397	1.7843	0.887071	-0.172879	0.837763	0.076879
Vesicle-trafficking protein SEC22b OS=Homo sapiens GN=SEC22B PE=1 SV=4	SC22B_HUMAN	491 kDa	3.8296	2.8462	3.7524	3.47607	3.0889	4.5078	4.1588	3.9185	0.887091	-0.172846	0.451534	0.345309
Acyl-CoA synthetase family member 2, mitochondrial OS=Homo sapiens GN=ACSF2 PE=1 SV=2	ACSF2_HUMAN	380 kDa	2.8722	2.8462	1.8762	2.53153	3.0889	3.3808	2.0794	2.8497	0.888351	-0.170799	0.568493	0.245275
NADH dehydrogenase [ubiquinone] 1 alpha subcomplex subunit 8 OS=Homo sapiens GN=NDUFA8 PE=1 SV=3	NDUA8_HUMAN	224 kDa	1.9148	1.8975	0.93809	1.58346	3.0889	2.2539	0	1.78093	0.88912	-0.16955	0.849738	0.0707149
Developmentally-regulated GTP-binding protein 1 OS=Homo sapiens GN=DRG1 PE=1 SV=1	DRG1_HUMAN	410 kDa	1.9148	3.795	2.8143	2.84137	4.1186	3.3808	2.0794	3.19293	0.889892	-0.168297	0.685321	0.164106
ATPase family AAA domain-containing protein 3A OS=Homo sapiens GN=ATAD3A PE=1 SV=2	ATD3A_HUMAN	608 kDa	4.787	4.7437	5.6286	5.0531	5.1482	5.6347	6.2383	5.67373	0.890613	-0.16713	0.219794	0.657983
FERM, RhoGEF and pleckstrin domain-containing protein 1 OS=Homo sapiens GN=FARP1 PE=1 SV=1	FARP1_HUMAN	233 kDa	3.8296	0.94875	0	1.59278	1.0296	2.2539	2.0794	1.78763	0.891001	-0.166501	0.880194	0.0554215
Unconventional myosin-Ic OS=Homo sapiens GN=MYO1C PE=1 SV=4	MYO1C_HUMAN	532 kDa	4.787	3.795	3.7524	4.11147	5.1482	4.5078	4.1588	4.60493	0.89284	-0.163527	0.329805	0.481743
Adenylate kinase isoenzyme 4, mitochondrial OS=Homo sapiens GN=AK4 PE=1 SV=1	KAD4_HUMAN	955 kDa	17.233	13.282	18.762	16.4257	21.623	16.904	16.635	18.3873	0.893314	-0.16276	0.441732	0.354841
Septin-7 OS=Homo sapiens GN=SEPT7 PE=1 SV=2	SEPT7_HUMAN	449 kDa	4.787	1.8975	2.8143	3.16627	3.0889	3.3808	4.1588	3.54283	0.89371	-0.162121	0.700339	0.154692
Coatomer subunit zeta-1 OS=Homo sapiens GN=COPZ1 PE=1 SV=1	COPZ1_HUMAN	367 kDa	1.9148	1.8975	3.7524	2.52157	3.0889	2.2539	3.1191	2.82063	0.893972	-0.161699	0.681758	0.16637
Transcription intermediary factor 1-beta OS=Homo sapiens GN=TRIM28 PE=1 SV=5	TIF1B_HUMAN	839 kDa	10.531	9.4875	10.319	10.1125	12.356	10.142	11.437	11.3117	0.893989	-0.161672	0.169657	0.770429
Long-chain-fatty-acid--CoA ligase 3 OS=Homo sapiens GN=ACSL3 PE=1 SV=3	ACSL3_HUMAN	321 kDa	1.9148	2.8462	1.8762	2.2124	3.0889	2.2539	2.0794	2.47407	0.894236	-0.161272	0.587725	0.230826
40S ribosomal protein S27-like OS=Homo sapiens GN=RPS27L PE=1 SV=3	RS27L_HUMAN	580 kDa	4.787	5.6925	3.7524	4.74397	4.1186	4.5078	7.278	5.30147	0.89484	-0.160298	0.650885	0.186495
NADH dehydrogenase [ubiquinone] 1 beta subcomplex subunit 10 OS=Homo sapiens GN=NDUFB10 PE=1 SV=3	NDUBA_HUMAN	322 kDa	2.8722	1.8975	1.8762	2.2153	3.0889	2.2539	2.0794	2.47407	0.895408	-0.159382	0.598194	0.223158
Clathrin interactor 1 OS=Homo sapiens GN=CLINT1 PE=1 SV=1	EPN4_HUMAN	209 kDa	0.9574	0.94875	2.8143	1.57348	2.0593	1.1269	2.0794	1.7552	0.89647	-0.157674	0.806765	0.0932527
S-phase kinase-associated protein 1 OS=Homo sapiens GN=SKP1 PE=1 SV=2	SKP1_HUMAN	677 kDa	7.6592	6.6412	4.6905	6.3303	6.1779	5.6347	9.3574	7.05667	0.897067	-0.156713	0.643031	0.191768
Myb-binding protein 1A OS=Homo sapiens GN=MYBBP1A PE=1 SV=2	MBB1A_HUMAN	959 kDa	18.191	18.026	14.071	16.7627	20.593	14.65	20.794	18.679	0.897407	-0.156166	0.473406	0.324767
Formimidoyltransferase-cyclodeaminase OS=Homo sapiens GN=FTCD PE=1 SV=2	FTCD_HUMAN	368 kDa	3.8296	1.8975	1.8762	2.53443	3.0889	2.2539	3.1191	2.82063	0.898533	-0.154356	0.706311	0.151004
Plastin-2 OS=Homo sapiens GN=LCP1 PE=1 SV=6	PLSL_HUMAN	203 kDa	1.9148	0	2.8143	1.57637	3.0889	1.1269	1.0397	1.75183	0.899838	-0.152262	0.877233	0.0568851
Protein transport protein Sec61 subunit alpha isoform 1 OS=Homo sapiens GN=SEC61A1 PE=1 SV=2	S61A1_HUMAN	706 kDa	6.7018	3.795	10.319	6.9386	9.2668	4.5078	9.3574	7.71067	0.89987	-0.152211	0.770675	0.113129
ATP synthase subunit e, mitochondrial OS=Homo sapiens GN=ATP5I PE=1 SV=2	ATP5I_HUMAN	359 kDa	3.8296	1.8975	1.8762	2.53443	5.1482	2.2539	1.0397	2.81393	0.900673	-0.150925	0.849384	0.0708957
Thioredoxin-dependent peroxide reductase, mitochondrial OS=Homo sapiens GN=PRDX3 PE=1 SV=3	PRDX3_HUMAN	1026 kDa	25.85	20.872	22.514	23.0787	21.623	28.173	27.033	25.6097	0.90117	-0.150129	0.367799	0.434389
NHP2-like protein 1 OS=Homo sapiens GN=NHP2L1 PE=1 SV=3	NH2L1_HUMAN	435 kDa	3.8296	3.795	1.8762	3.16693	3.0889	2.2539	5.1986	3.5138	0.901284	-0.149946	0.765879	0.11584
10 kDa heat shock protein, mitochondrial OS=Homo sapiens GN=HSPE1 PE=1 SV=2	CH10_HUMAN	1173 kDa	76.592	73.054	75.986	75.2107	77.223	86.774	86.296	83.431	0.901471	-0.149646	0.0670589	1.17354
Xaa-Pro aminopeptidase 1 OS=Homo sapiens GN=XPNPEP1 PE=1 SV=3	XPP1_HUMAN	257 kDa	1.9148	1.8975	1.8762	1.89617	3.0889	1.1269	2.0794	2.0984	0.903625	-0.146204	0.739169	0.131256
26S proteasome non-ATPase regulatory subunit 14 OS=Homo sapiens GN=PSMD14 PE=1 SV=1	PSDE_HUMAN	210 kDa	3.8296	0	0.93809	1.58923	2.0593	1.1269	2.0794	1.7552	0.905441	-0.143307	0.89621	0.0475904
Cluster of ADP-ribosylation factor-like protein 8B OS=Homo sapiens GN=ARL8B PE=1 SV=1 (ARL8B_HUMAN)	ARL8B_HUMAN [2]	649 kDa	4.787	4.7437	8.4428	5.99117	8.2372	2.2539	9.3574	6.61617	0.905534	-0.143159	0.816535	0.0880251
Bile salt sulfotransferase OS=Homo sapiens GN=SULT2A1 PE=1 SV=3	ST2A1_HUMAN	896 kDa	12.446	14.231	11.257	12.6447	12.356	18.031	11.437	13.9413	0.906991	-0.14084	0.593038	0.226918
60S ribosomal protein L30 OS=Homo sapiens GN=RPL30 PE=1 SV=2	RL30_HUMAN	951 kDa	19.148	13.282	15.948	16.126	17.504	19.158	16.635	17.7657	0.907706	-0.139703	0.425555	0.371045
Dihydrolipoyl dehydrogenase, mitochondrial OS=Homo sapiens GN=DLD PE=1 SV=2	DLDH_HUMAN	973 kDa	22.02	14.231	16.886	17.7123	18.534	18.031	21.834	19.4663	0.909896	-0.136227	0.533695	0.272706
Catenin beta-1 OS=Homo sapiens GN=CTNNB1 PE=1 SV=1	CTNB1_HUMAN	1038 kDa	28.722	20.872	23.452	24.3487	22.652	31.554	25.993	26.733	0.910809	-0.134779	0.53035	0.275437
Nuclear mitotic apparatus protein 1 OS=Homo sapiens GN=NUMA1 PE=1 SV=2	NUMA1_HUMAN	238 kDa	0	0	0.93809	0.312697	1.0296	0	0	0.3432	0.911121	-0.134286	0.95077	0.0219245
Protein CDV3 homolog OS=Homo sapiens GN=CDV3 PE=1 SV=1	CDV3_HUMAN	153 kDa	0	1.8975	1.8762	1.2579	2.0593	0	2.0794	1.37957	0.911808	-0.133198	0.902596	0.0445068
Cluster of AP-1 complex subunit beta-1 OS=Homo sapiens GN=AP1B1 PE=1 SV=2 (AP1B1_HUMAN)	AP1B1_HUMAN [2]	826 kDa	9.574	11.385	8.4428	9.8006	8.2372	14.65	9.3574	10.7482	0.911836	-0.133153	0.682877	0.165658
Myosin-10 OS=Homo sapiens GN=MYH10 PE=1 SV=3	MYH10_HUMAN	1032 kDa	26.807	19.924	24.39	23.707	18.534	28.173	31.191	25.966	0.913002	-0.131311	0.628392	0.20177
Succinate dehydrogenase [ubiquinone] iron-sulfur subunit, mitochondrial OS=Homo sapiens GN=SDHB PE=1 SV=3	DHSB_HUMAN	32 kDa	1.9148	0	0.93809	0.950963	0	0	3.1191	1.0397	0.914652	-0.128706	0.943548	0.0252362
Glycogen phosphorylase, brain form OS=Homo sapiens GN=PYGB PE=1 SV=5	PYGB_HUMAN	794 kDa	8.6166	6.6412	11.257	8.83827	7.2075	12.396	9.3574	9.65363	0.915538	-0.127309	0.706198	0.151074
AFG3-like protein 2 OS=Homo sapiens GN=AFG3L2 PE=1 SV=2	AFG32_HUMAN	250 kDa	1.9148	1.8975	1.8762	1.89617	3.0889	0	3.1191	2.06933	0.916318	-0.12608	0.875215	0.0578851
Mitochondrial import receptor subunit TOM34 OS=Homo sapiens GN=TOMM34 PE=1 SV=2	TOM34_HUMAN	154 kDa	0.9574	1.8975	0.93809	1.26433	2.0593	0	2.0794	1.37957	0.916469	-0.125842	0.886674	0.0522358
Cluster of Aldehyde dehydrogenase, mitochondrial OS=Homo sapiens GN=ALDH2 PE=1 SV=2 (ALDH2_HUMAN)	ALDH2_HUMAN [2]	1075 kDa	30.637	28.462	32.833	30.644	33.978	36.062	30.152	33.3973	0.917558	-0.124128	0.267979	0.571899
Hsp70-binding protein 1 OS=Homo sapiens GN=HSPBP1 PE=1 SV=1	HPBP1_HUMAN	39 kDa	1.9148	0	0.93809	0.950963	1.0296	0	2.0794	1.03633	0.917623	-0.124026	0.921717	0.0354025
SEC23-interacting protein OS=Homo sapiens GN=SEC23IP PE=1 SV=1	S23IP_HUMAN	111 kDa	0.9574	1.8975	0	0.951633	1.0296	0	2.0794	1.03633	0.91827	-0.12301	0.922005	0.0352665
26S proteasome non-ATPase regulatory subunit 5 OS=Homo sapiens GN=PSMD5 PE=1 SV=3	PSMD5_HUMAN	195 kDa	1.9148	1.8975	0.93809	1.58346	3.0889	0	2.0794	1.72277	0.91914	-0.121644	0.892191	0.0495422
Prolactin regulatory element-binding protein OS=Homo sapiens GN=PREB PE=1 SV=2	PREB_HUMAN	45 kDa	0.9574	0.94875	0.93809	0.94808	3.0889	0	0	1.02963	0.920794	-0.11905	0.940674	0.026561
Peroxisomal trans-2-enoyl-CoA reductase OS=Homo sapiens GN=PECR PE=1 SV=2	PECR_HUMAN	155 kDa	1.9148	1.8975	0	1.27077	2.0593	0	2.0794	1.37957	0.921135	-0.118516	0.913236	0.039417
Nucleosome assembly protein 1-like 4 OS=Homo sapiens GN=NAP1L4 PE=1 SV=1	NP1L4_HUMAN	733 kDa	4.787	9.4875	8.4428	7.57243	6.1779	10.142	8.3177	8.21253	0.922058	-0.11707	0.743924	0.128472
Serine hydroxymethyltransferase, mitochondrial OS=Homo sapiens GN=SHMT2 PE=1 SV=3	GLYM_HUMAN	1113 kDa	42.126	35.104	40.338	39.1893	39.127	34.935	53.025	42.3623	0.925099	-0.112321	0.616869	0.209807
14-3-3 protein eta OS=Homo sapiens GN=YWHAH PE=1 SV=4	1433F_HUMAN	1085 kDa	31.594	35.104	33.771	33.4897	40.156	37.189	31.191	36.1787	0.925674	-0.111423	0.39557	0.402777
F-actin-capping protein subunit alpha-1 OS=Homo sapiens GN=CAPZA1 PE=1 SV=3	CAZA1_HUMAN	731 kDa	7.6592	7.59	7.5047	7.58463	7.2075	9.0155	8.3177	8.18023	0.92719	-0.109063	0.322646	0.491274
6-phosphogluconate dehydrogenase, decarboxylating OS=Homo sapiens GN=PGD PE=1 SV=3	6PGD_HUMAN	1107 kDa	32.552	28.462	50.657	37.2237	39.127	40.57	40.549	40.082	0.928688	-0.106734	0.697339	0.156556
Citrate synthase, mitochondrial OS=Homo sapiens GN=CS PE=1 SV=2	CISY_HUMAN	1080 kDa	38.296	25.616	34.709	32.8737	33.978	31.554	40.549	35.3603	0.929676	-0.105199	0.619886	0.207688
Heterogeneous nuclear ribonucleoprotein Q OS=Homo sapiens GN=SYNCRIP PE=1 SV=2	HNRPQ_HUMAN	1001 kDa	25.85	19.924	16.886	20.8867	19.563	25.92	21.834	22.439	0.93082	-0.103426	0.655213	0.183617
Protein transport protein Sec31A OS=Homo sapiens GN=SEC31A PE=1 SV=3	SC31A_HUMAN	753 kDa	5.7444	7.59	11.257	8.19713	10.296	6.7616	9.3574	8.805	0.930963	-0.103204	0.769044	0.114049
Rho GDP-dissociation inhibitor 1 OS=Homo sapiens GN=ARHGDIA PE=1 SV=3	GDIR1_HUMAN	916 kDa	13.404	15.18	13.133	13.9057	13.385	15.777	15.596	14.9193	0.932057	-0.10151	0.368797	0.433213
Heterogeneous nuclear ribonucleoprotein R OS=Homo sapiens GN=HNRNPR PE=1 SV=1	HNRPR_HUMAN	1046 kDa	25.85	32.257	19.7	25.9357	25.741	33.808	23.913	27.8207	0.932245	-0.10122	0.71066	0.148338
Glutathione S-transferase omega-1 OS=Homo sapiens GN=GSTO1 PE=1 SV=2	GSTO1_HUMAN	909 kDa	13.404	13.282	14.071	13.5857	13.385	15.777	14.556	14.5727	0.93227	-0.10118	0.249268	0.603334
RNA-binding protein Raly OS=Homo sapiens GN=RALY PE=1 SV=1	RALY_HUMAN	726 kDa	6.7018	9.4875	6.5666	7.5853	9.2668	6.7616	8.3177	8.11537	0.934684	-0.09745	0.681453	0.166564
X-ray repair cross-complementing protein 6 OS=Homo sapiens GN=XRCC6 PE=1 SV=2	XRCC6_HUMAN	1152 kDa	62.231	48.386	60.976	57.1977	60.749	54.093	68.621	61.1543	0.9353	-0.0964984	0.55174	0.258265
Trifunctional purine biosynthetic protein adenosine-3 OS=Homo sapiens GN=GART PE=1 SV=1	PUR2_HUMAN	907 kDa	15.318	13.282	12.195	13.5983	15.445	14.65	13.516	14.537	0.935429	-0.0962997	0.431013	0.36551
Cluster of Alpha-actinin-4 OS=Homo sapiens GN=ACTN4 PE=1 SV=2 (ACTN4_HUMAN)	ACTN4_HUMAN [3]	1213 kDa	181.91	194.49	197	191.133	204.9	185.94	220.42	203.753	0.938062	-0.0922443	0.315563	0.500914
Glutaminase kidney isoform, mitochondrial OS=Homo sapiens GN=GLS PE=1 SV=1	GLSK_HUMAN	1056 kDa	13.404	23.719	45.028	27.3837	36.038	19.158	32.231	29.1423	0.939653	-0.0898008	0.876528	0.0572343
Trifunctional enzyme subunit beta, mitochondrial OS=Homo sapiens GN=HADHB PE=1 SV=3	ECHB_HUMAN	1103 kDa	44.998	32.257	34.709	37.3213	42.215	37.189	39.509	39.6377	0.941562	-0.0868715	0.607713	0.216302
Splicing factor 3B subunit 3 OS=Homo sapiens GN=SF3B3 PE=1 SV=4	SF3B3_HUMAN	630 kDa	5.7444	5.6925	6.5666	6.00117	7.2075	5.6347	6.2383	6.36017	0.943555	-0.0838216	0.541487	0.266412
Bifunctional glutamate/proline--tRNA ligase OS=Homo sapiens GN=EPRS PE=1 SV=5	SYEP_HUMAN	1049 kDa	29.679	25.616	24.39	26.5617	25.741	31.554	27.033	28.1093	0.944941	-0.0817036	0.550832	0.258981
Matrin-3 OS=Homo sapiens GN=MATR3 PE=1 SV=2	MATR3_HUMAN	1066 kDa	28.722	29.411	29.081	29.0713	33.978	27.046	31.191	30.7383	0.945768	-0.0804417	0.456359	0.340693
Malate dehydrogenase, mitochondrial OS=Homo sapiens GN=MDH2 PE=1 SV=3	MDHM_HUMAN	1194 kDa	110.1	94.875	101.31	102.095	109.14	107.06	107.09	107.763	0.9474	-0.0779542	0.273182	0.563549
Cluster of 60S ribosomal protein L10 OS=Homo sapiens GN=RPL10 PE=1 SV=4 (RL10_HUMAN)	RL10_HUMAN [2]	990 kDa	22.02	18.975	18.762	19.919	19.563	24.793	18.715	21.0237	0.947456	-0.0778691	0.637862	0.195274
Cluster of Poly(rC)-binding protein 1 OS=Homo sapiens GN=PCBP1 PE=1 SV=2 (PCBP1_HUMAN)	PCBP1_HUMAN [3]	1136 kDa	45.955	46.489	45.028	45.824	51.482	39.443	54.065	48.33	0.948148	-0.0768156	0.609268	0.215192
Fumarate hydratase, mitochondrial OS=Homo sapiens GN=FH PE=1 SV=3	FUMH_HUMAN	581 kDa	3.8296	3.795	7.5047	5.0431	9.2668	5.6347	1.0397	5.31373	0.949069	-0.075415	0.924417	0.0341321
Non-specific lipid-transfer protein OS=Homo sapiens GN=SCP2 PE=1 SV=2	NLTP_HUMAN	584 kDa	5.7444	4.7437	4.6905	5.05953	4.1186	5.6347	6.2383	5.33053	0.949161	-0.0752756	0.724902	0.139721
Heat shock protein 75 kDa, mitochondrial OS=Homo sapiens GN=TRAP1 PE=1 SV=3	TRAP1_HUMAN	1116 kDa	39.254	39.847	44.09	41.0637	38.097	55.22	36.39	43.2357	0.949764	-0.0743595	0.743855	0.128512
Insulin-like growth factor 2 mRNA-binding protein 2 OS=Homo sapiens GN=IGF2BP2 PE=1 SV=2	IF2B2_HUMAN	554 kDa	3.8296	3.795	6.5666	4.7304	7.2075	4.5078	3.1191	4.9448	0.956641	-0.06395	0.894037	0.0486445
Glycylpeptide N-tetradecanoyltransferase 1 OS=Homo sapiens GN=NMT1 PE=1 SV=2	NMT1_HUMAN	560 kDa	3.8296	6.6412	3.7524	4.74107	4.1186	4.5078	6.2383	4.9549	0.956844	-0.0636443	0.861798	0.0645947
Nascent polypeptide-associated complex subunit alpha OS=Homo sapiens GN=NACA PE=1 SV=1	NACA_HUMAN	519 kDa	5.7444	2.8462	3.7524	4.11433	5.1482	5.6347	2.0794	4.28743	0.959626	-0.0594556	0.907825	0.0419977
Ribosomal L1 domain-containing protein 1 OS=Homo sapiens GN=RSL1D1 PE=1 SV=3	RL1D1_HUMAN	920 kDa	13.404	16.129	14.071	14.5347	16.474	11.269	17.675	15.1393	0.96006	-0.0588037	0.790606	0.10204
Sodium/potassium-transporting ATPase subunit beta-1 OS=Homo sapiens GN=ATP1B1 PE=1 SV=1	AT1B1_HUMAN	538 kDa	5.7444	3.795	3.7524	4.4306	4.1186	4.5078	5.1986	4.60833	0.961432	-0.056743	0.819369	0.0865206
Cluster of Proteasome subunit alpha type-4 OS=Homo sapiens GN=PSMA4 PE=1 SV=1 (PSA4_HUMAN)	PSA4_HUMAN	861 kDa	13.404	12.334	9.3809	11.7063	13.385	16.904	6.2383	12.1758	0.961443	-0.0567275	0.895646	0.0478635
Cytosol aminopeptidase OS=Homo sapiens GN=LAP3 PE=1 SV=3	AMPL_HUMAN	893 kDa	14.361	13.282	12.195	13.2793	15.445	12.396	13.516	13.7857	0.963271	-0.0539863	0.665881	0.176604
Cluster of Coronin-1C OS=Homo sapiens GN=CORO1C PE=1 SV=1 (COR1C_HUMAN)	COR1C_HUMAN	390 kDa	2.8722	4.7437	0.93809	2.85133	0	6.7616	2.0794	2.947	0.967536	-0.047612	0.968561	0.0138728
DnaJ homolog subfamily B member 1 OS=Homo sapiens GN=DNAJB1 PE=1 SV=4	DNJB1_HUMAN	487 kDa	3.8296	3.795	3.7524	3.79233	4.1186	4.5078	3.1191	3.91517	0.968626	-0.0459879	0.781561	0.107037
28S ribosomal protein S36, mitochondrial OS=Homo sapiens GN=MRPS36 PE=1 SV=2	RT36_HUMAN	486 kDa	3.8296	3.795	3.7524	3.79233	5.1482	4.5078	2.0794	3.9118	0.96946	-0.0447468	0.904489	0.0435968
Cluster of Tropomyosin alpha-4 chain OS=Homo sapiens GN=TPM4 PE=1 SV=3 (TPM4_HUMAN)	TPM4_HUMAN [2]	1109 kDa	43.083	37.001	37.524	39.2027	37.067	39.443	44.708	40.406	0.970219	-0.0436177	0.707074	0.150535
T-complex protein 1 subunit delta OS=Homo sapiens GN=CCT4 PE=1 SV=4	TCPD_HUMAN	1120 kDa	45.955	42.694	40.338	42.9957	46.334	40.57	45.747	44.217	0.972379	-0.0404099	0.644384	0.190855
60S ribosomal protein L12 OS=Homo sapiens GN=RPL12 PE=1 SV=1	RL12_HUMAN	1031 kDa	26.807	26.565	22.514	25.2953	22.652	28.173	27.033	25.9527	0.974672	-0.0370115	0.778448	0.10877
Adenylosuccinate lyase OS=Homo sapiens GN=ADSL PE=1 SV=2	PUR8_HUMAN	671 kDa	5.7444	6.6412	7.5047	6.6301	6.1779	9.0155	5.1986	6.79733	0.975397	-0.0359382	0.900214	0.0456542
Catalase OS=Homo sapiens GN=CAT PE=1 SV=3	CATA_HUMAN	915 kDa	15.318	16.129	12.195	14.5473	15.445	15.777	13.516	14.9127	0.975502	-0.0357835	0.805807	0.0937688
Cluster of ERO1-like protein alpha OS=Homo sapiens GN=ERO1L PE=1 SV=2 (ERO1A_HUMAN)	ERO1A_HUMAN	750 kDa	11.489	3.795	10.319	8.53433	11.326	4.5078	10.397	8.7436	0.976066	-0.0349489	0.951108	0.0217701
Aflatoxin B1 aldehyde reductase member 2 OS=Homo sapiens GN=AKR7A2 PE=1 SV=3	ARK72_HUMAN	712 kDa	8.6166	6.6412	7.5047	7.5875	8.2372	6.7616	8.3177	7.77217	0.97624	-0.0346922	0.820748	0.0857899
tRNA-splicing ligase RtcB homolog OS=Homo sapiens GN=C22orf28 PE=1 SV=1	RTCB_HUMAN	901 kDa	15.318	16.129	10.319	13.922	14.415	16.904	11.437	14.252	0.976845	-0.0337979	0.89761	0.0469125
Presequence protease, mitochondrial OS=Homo sapiens GN=PITRM1 PE=1 SV=2	PREP_HUMAN	499 kDa	4.787	1.8975	5.6286	4.10437	5.1482	2.2539	5.1986	4.20023	0.977176	-0.0333099	0.951827	0.0214419
Small nuclear ribonucleoprotein E OS=Homo sapiens GN=SNRPE PE=1 SV=1	RUXE_HUMAN	500 kDa	4.787	3.795	3.7524	4.11147	3.0889	2.2539	7.278	4.20693	0.977307	-0.0331158	0.955021	0.0199871
Transmembrane protein 33 OS=Homo sapiens GN=TMEM33 PE=1 SV=2	TMM33_HUMAN	425 kDa	3.8296	1.8975	3.7524	3.15983	2.0593	4.5078	3.1191	3.22873	0.97866	-0.0311198	0.945634	0.024277
Cluster of Ras-related protein Rab-5C OS=Homo sapiens GN=RAB5C PE=1 SV=2 (RAB5C_HUMAN)	RAB5C_HUMAN [2]	666 kDa	5.7444	7.59	6.5666	6.63367	8.2372	7.8886	4.1588	6.76153	0.981089	-0.0275439	0.932112	0.0305321
Glutaredoxin-1 OS=Homo sapiens GN=GLRX PE=1 SV=2	GLRX1_HUMAN	439 kDa	1.9148	4.7437	3.7524	3.4703	5.1482	3.3808	2.0794	3.53613	0.981383	-0.0271123	0.959406	0.0179976
Histone H4 OS=Homo sapiens GN=HIST1H4A PE=1 SV=2	H4_HUMAN	1214 kDa	217.33	205.88	184.8	202.67	203.87	209.61	205.86	206.447	0.981706	-0.0266366	0.716151	0.144995
Cytochrome c oxidase subunit 7A2, mitochondrial OS=Homo sapiens GN=COX7A2 PE=1 SV=1	CX7A2_HUMAN	442 kDa	2.8722	5.6925	1.8762	3.4803	4.1186	3.3808	3.1191	3.5395	0.983274	-0.0243339	0.962437	0.0166278
Galectin-3 OS=Homo sapiens GN=LGALS3 PE=1 SV=5	LEG3_HUMAN	642 kDa	6.7018	6.6412	5.6286	6.32387	5.1482	7.8886	6.2383	6.42503	0.984254	-0.022897	0.912963	0.0395469
Ubiquitin thioesterase OTUB1 OS=Homo sapiens GN=OTUB1 PE=1 SV=2	OTUB1_HUMAN	807 kDa	10.531	3.795	15.948	10.0913	10.296	9.0155	11.437	10.2495	0.984568	-0.0224367	0.966915	0.0146115
Cluster of Vesicle-associated membrane protein-associated protein A OS=Homo sapiens GN=VAPA PE=1 SV=3 (VAPA_HUMAN)	VAPA_HUMAN [2]	808 kDa	11.489	8.5387	10.319	10.1156	12.356	10.142	8.3177	10.2719	0.98478	-0.0221259	0.919265	0.0365595
Protein CutA OS=Homo sapiens GN=CUTA PE=1 SV=2	CUTA_HUMAN	389 kDa	2.8722	3.795	1.8762	2.8478	1.0296	4.5078	3.1191	2.8855	0.986935	-0.0189735	0.975477	0.0107832
Cluster of T-complex protein 1 subunit zeta OS=Homo sapiens GN=CCT6A PE=1 SV=3 (TCPZ_HUMAN)	TCPZ_HUMAN [2]	1022 kDa	24.892	22.77	27.205	24.9557	28.83	27.046	19.755	25.2103	0.989898	-0.0146477	0.937611	0.0279771
Catenin delta-1 OS=Homo sapiens GN=CTNND1 PE=1 SV=1	CTND1_HUMAN	766 kDa	6.7018	9.4875	11.257	9.14877	10.296	7.8886	9.3574	9.18067	0.996525	-0.00502165	0.984047	0.00698434
Annexin A5 OS=Homo sapiens GN=ANXA5 PE=1 SV=2	ANXA5_HUMAN	1192 kDa	106.27	104.36	100.38	103.67	91.638	104.81	115.41	103.953	0.997281	-0.0039283	0.970114	0.0131772
Mitochondrial pyruvate carrier 2 OS=Homo sapiens GN=MPC2 PE=1 SV=1	MPC2_HUMAN	381 kDa	2.8722	2.8462	2.8143	2.84423	3.0889	3.3808	2.0794	2.8497	0.998082	-0.00277022	0.989611	0.00453568
Eukaryotic translation initiation factor 5A-1 OS=Homo sapiens GN=EIF5A PE=1 SV=2	IF5A1_HUMAN	1129 kDa	47.87	43.642	49.719	47.077	44.275	45.077	51.986	47.1127	0.999243	-0.00109261	0.991193	0.00384164
Arf-GAP with Rho-GAP domain, ANK repeat and PH domain-containing protein 1 OS=Homo sapiens GN=ARAP1 PE=1 SV=3	ARAP1_HUMAN	162 kDa	0	0	0	0.1	0	0	0	0.1	1	0	#DIV/0!	#DIV/0!
Nuclear pore complex protein Nup93 OS=Homo sapiens GN=NUP93 PE=1 SV=2	NUP93_HUMAN	93 kDa	0	0	0	0.1	0	0	0	0.1	1	0	#DIV/0!	#DIV/0!
Nuclear pore complex protein Nup214 OS=Homo sapiens GN=NUP214 PE=1 SV=2	NU214_HUMAN	214 kDa	0	0	0	0.1	0	0	0	0.1	1	0	#DIV/0!	#DIV/0!
Protein ETHE1, mitochondrial OS=Homo sapiens GN=ETHE1 PE=1 SV=2	ETHE1_HUMAN	28 kDa	0	0	0	0.1	0	0	0	0.1	1	0	#DIV/0!	#DIV/0!
DNA-directed RNA polymerase, mitochondrial OS=Homo sapiens GN=POLRMT PE=1 SV=2	RPOM_HUMAN	139 kDa	0	0	0	0.1	0	0	0	0.1	1	0	#DIV/0!	#DIV/0!
Ubiquitin-conjugating enzyme E2 O OS=Homo sapiens GN=UBE2O PE=1 SV=3	UBE2O_HUMAN	141 kDa	0	0	0	0.1	0	0	0	0.1	1	0	#DIV/0!	#DIV/0!
Ceramide synthase 2 OS=Homo sapiens GN=CERS2 PE=1 SV=1	CERS2_HUMAN	45 kDa	0	0	0	0.1	0	0	0	0.1	1	0	#DIV/0!	#DIV/0!
Ras-related protein Rab-6A OS=Homo sapiens GN=RAB6A PE=1 SV=3	RAB6A_HUMAN	24 kDa	0	0	0	0.1	0	0	0	0.1	1	0	#DIV/0!	#DIV/0!
Fragile X mental retardation syndrome-related protein 1 OS=Homo sapiens GN=FXR1 PE=1 SV=3	FXR1_HUMAN	70 kDa	0	0	0	0.1	0	0	0	0.1	1	0	#DIV/0!	#DIV/0!
dCTP pyrophosphatase 1 OS=Homo sapiens GN=DCTPP1 PE=1 SV=1	DCTP1_HUMAN	19 kDa	0	0	0	0.1	0	0	0	0.1	1	0	#DIV/0!	#DIV/0!
Importin subunit alpha-3 OS=Homo sapiens GN=KPNA3 PE=1 SV=2	IMA3_HUMAN	58 kDa	0	0	0	0.1	0	0	0	0.1	1	0	#DIV/0!	#DIV/0!
Plakophilin-2 OS=Homo sapiens GN=PKP2 PE=1 SV=2	PKP2_HUMAN	97 kDa	0	0	0	0.1	0	0	0	0.1	1	0	#DIV/0!	#DIV/0!
A-kinase anchor protein 12 OS=Homo sapiens GN=AKAP12 PE=1 SV=4	AKA12_HUMAN	191 kDa	0	0	0	0.1	0	0	0	0.1	1	0	#DIV/0!	#DIV/0!
Protein enabled homolog OS=Homo sapiens GN=ENAH PE=1 SV=2	ENAH_HUMAN	67 kDa	0	0	0	0.1	0	0	0	0.1	1	0	#DIV/0!	#DIV/0!
Delta-1-pyrroline-5-carboxylate synthase OS=Homo sapiens GN=ALDH18A1 PE=1 SV=2	P5CS_HUMAN	1094 kDa	42.126	33.206	39.4	38.244	38.097	36.062	40.549	38.236	1.00021	0.000301819	0.99796	0.000887034
RuvB-like 2 OS=Homo sapiens GN=RUVBL2 PE=1 SV=3	RUVB2_HUMAN	354 kDa	3.8296	2.8462	0.93809	2.53796	2.0593	4.5078	1.0397	2.5356	1.00093	0.00134405	0.998671	0.000577442
Cluster of Histone H3.1 OS=Homo sapiens GN=HIST1H3A PE=1 SV=2 (H31_HUMAN)	H31_HUMAN [4]	1130 kDa	45.955	49.335	46.905	47.3983	50.453	52.966	38.469	47.296	1.00216	0.00311816	0.983261	0.0073313
Protein diaphanous homolog 1 OS=Homo sapiens GN=DIAPH1 PE=1 SV=2	DIAP1_HUMAN	605 kDa	4.787	6.6412	5.6286	5.6856	6.1779	5.6347	5.1986	5.6704	1.00268	0.0038621	0.981199	0.00824302
Acetyl-CoA acetyltransferase, mitochondrial OS=Homo sapiens GN=ACAT1 PE=1 SV=1	THIL_HUMAN	945 kDa	17.233	18.026	16.886	17.3817	18.534	15.777	17.675	17.3287	1.00306	0.00440577	0.954946	0.0200213
Cluster of Tubulin beta chain OS=Homo sapiens GN=TUBB PE=1 SV=2 (TBB5_HUMAN)	TBB5_HUMAN [10]	1226 kDa	600.29	674.56	584.43	619.76	628.08	617.56	607.19	617.61	1.00348	0.00501353	0.943343	0.0253303
SUMO-activating enzyme subunit 2 OS=Homo sapiens GN=UBA2 PE=1 SV=2	SAE2_HUMAN	369 kDa	1.9148	1.8975	4.6905	2.83427	3.0889	2.2539	3.1191	2.82063	1.00483	0.00695637	0.989464	0.0045999
Pyruvate carboxylase, mitochondrial OS=Homo sapiens GN=PC PE=1 SV=2	PYC_HUMAN	883 kDa	13.404	12.334	14.071	13.2697	10.296	14.65	14.556	13.1673	1.00777	0.0111689	0.949635	0.0224434
Fatty acid-binding protein, epidermal OS=Homo sapiens GN=FABP5 PE=1 SV=3	FABP5_HUMAN	582 kDa	4.787	5.6925	5.6286	5.36937	5.1482	5.6347	5.1986	5.32717	1.00792	0.0113835	0.904453	0.0436141
Actin-related protein 2/3 complex subunit 2 OS=Homo sapiens GN=ARPC2 PE=1 SV=1	ARPC2_HUMAN	619 kDa	4.787	6.6412	6.5666	5.99827	9.2668	3.3808	5.1986	5.94873	1.00833	0.0119632	0.979841	0.00884447
Importin-5 OS=Homo sapiens GN=IPO5 PE=1 SV=4	IPO5_HUMAN	1012 kDa	26.807	25.616	20.638	24.3537	27.8	25.92	18.715	24.145	1.00864	0.0124145	0.953348	0.0207484
Cluster of Dihydropyrimidinase-related protein 2 OS=Homo sapiens GN=DPYSL2 PE=1 SV=1 (DPYL2_HUMAN)	DPYL2_HUMAN	815 kDa	11.489	9.4875	10.319	10.4318	11.326	12.396	7.278	10.3333	1.00953	0.013687	0.955615	0.0197172
Cluster of 40S ribosomal protein S4, X isoform OS=Homo sapiens GN=RPS4X PE=1 SV=2 (RS4X_HUMAN)	RS4X_HUMAN [2]	1090 kDa	40.211	37.95	35.648	37.9363	32.949	36.062	43.668	37.5597	1.01003	0.014396	0.91821	0.0370582
Cytochrome c oxidase subunit 6C OS=Homo sapiens GN=COX6C PE=1 SV=2	COX6C_HUMAN	370 kDa	4.787	0.94875	2.8143	2.85002	3.0889	2.2539	3.1191	2.82063	1.01042	0.0149512	0.980736	0.0084477
Sulfotransferase 1A3/1A4 OS=Homo sapiens GN=SULT1A3 PE=1 SV=1	ST1A3_HUMAN	1095 kDa	38.296	37.95	41.276	39.174	43.245	29.3	43.668	38.7377	1.01126	0.0161594	0.932459	0.0303701
40S ribosomal protein S14 OS=Homo sapiens GN=RPS14 PE=1 SV=3	RS14_HUMAN	923 kDa	16.276	18.026	12.195	15.499	13.385	18.031	14.556	15.324	1.01142	0.0163822	0.940968	0.0264253
60S ribosomal protein L4 OS=Homo sapiens GN=RPL4 PE=1 SV=5	RL4_HUMAN	1139 kDa	48.828	48.386	51.595	49.603	44.275	51.839	50.946	49.02	1.01189	0.0170569	0.83288	0.0794174
Putative ribosomal RNA methyltransferase NOP2 OS=Homo sapiens GN=NOP2 PE=1 SV=2	NOP2_HUMAN	294 kDa	2.8722	2.8462	0.93809	2.21883	1.0296	4.5078	1.0397	2.19237	1.01207	0.01731	0.985	0.00656383
Lamin-B1 OS=Homo sapiens GN=LMNB1 PE=1 SV=2	LMNB1_HUMAN	829 kDa	15.318	8.5387	9.3809	11.0792	10.296	9.0155	13.516	10.9425	1.01249	0.0179113	0.959318	0.0180375
Dolichyl-diphosphooligosaccharide--protein glycosyltransferase subunit 2 OS=Homo sapiens GN=RPN2 PE=1 SV=3	RPN2_HUMAN	1052 kDa	35.424	23.719	27.205	28.7827	30.889	30.427	23.913	28.4097	1.01313	0.0188184	0.932488	0.0303568
Tubulin--tyrosine ligase-like protein 12 OS=Homo sapiens GN=TTLL12 PE=1 SV=2	TTL12_HUMAN	696 kDa	4.787	8.5387	9.3809	7.56887	7.2075	7.8886	7.278	7.45803	1.01486	0.021282	0.941882	0.0260036
Eukaryotic translation initiation factor 2 subunit 1 OS=Homo sapiens GN=EIF2S1 PE=1 SV=3	IF2A_HUMAN	715 kDa	8.6166	5.6925	9.3809	7.89667	7.2075	6.7616	9.3574	7.7755	1.01558	0.0223083	0.934272	0.0295267
High mobility group protein HMG-I/HMG-Y OS=Homo sapiens GN=HMGA1 PE=1 SV=3	HMGA1_HUMAN	577 kDa	6.7018	4.7437	4.6905	5.37867	6.1779	4.5078	5.1986	5.29477	1.01585	0.0226815	0.923444	0.0345897
Aldose 1-epimerase OS=Homo sapiens GN=GALM PE=1 SV=1	GALM_HUMAN	333 kDa	0.9574	2.8462	3.7524	2.51867	2.0593	2.2539	3.1191	2.47743	1.01664	0.023814	0.965088	0.0154333
Heterogeneous nuclear ribonucleoprotein H3 OS=Homo sapiens GN=HNRNPH3 PE=1 SV=2	HNRH3_HUMAN	334 kDa	1.9148	2.8462	2.8143	2.5251	2.0593	2.2539	3.1191	2.47743	1.01924	0.0274943	0.920108	0.0361611
Cluster of Heat shock protein HSP 90-beta OS=Homo sapiens GN=HSP90AB1 PE=1 SV=4 (HS90B_HUMAN)	HS90B_HUMAN [6]	1225 kDa	584.02	672.66	606.95	621.21	618.82	662.64	544.81	608.757	1.02046	0.0292154	0.788641	0.10312
FACT complex subunit SPT16 OS=Homo sapiens GN=SUPT16H PE=1 SV=1	SP16H_HUMAN	308 kDa	1.9148	1.8975	3.7524	2.52157	4.1186	2.2539	1.0397	2.47073	1.02057	0.0293811	0.964926	0.0155059
Eukaryotic translation initiation factor 3 subunit L OS=Homo sapiens GN=EIF3L PE=1 SV=1	EIF3L_HUMAN	245 kDa	0.9574	1.8975	2.8143	1.88973	0	4.5078	1.0397	1.84917	1.02194	0.0313074	0.979227	0.00911656
60S ribosomal protein L18 OS=Homo sapiens GN=RPL18 PE=1 SV=2	RL18_HUMAN	1002 kDa	22.978	23.719	22.514	23.0703	22.652	18.031	27.033	22.572	1.02208	0.0315046	0.858548	0.0662356
Dehydrogenase/reductase SDR family member 2 OS=Homo sapiens GN=DHRS2 PE=1 SV=3	DHRS2_HUMAN	1165 kDa	77.55	69.259	82.552	76.4537	67.957	73.251	83.177	74.795	1.02218	0.0316439	0.792887	0.100789
Heat shock 70 kDa protein 4L OS=Homo sapiens GN=HSPA4L PE=1 SV=3	HS74L_HUMAN	323 kDa	2.8722	2.8462	1.8762	2.53153	3.0889	2.2539	2.0794	2.47407	1.02323	0.0331271	0.905003	0.0433501
60S ribosomal protein L7 OS=Homo sapiens GN=RPL7 PE=1 SV=1	RL7_HUMAN	1119 kDa	46.913	42.694	45.028	44.8783	42.215	51.839	37.43	43.828	1.02396	0.0341663	0.82342	0.0843784
Septin-2 OS=Homo sapiens GN=SEPT2 PE=1 SV=1	SEPT2_HUMAN	785 kDa	8.6166	9.4875	11.257	9.78703	12.356	9.0155	7.278	9.54983	1.02484	0.0353961	0.894567	0.048387
ATP-dependent RNA helicase DDX1 OS=Homo sapiens GN=DDX1 PE=1 SV=2	DDX1_HUMAN	912 kDa	19.148	12.334	14.071	15.1843	19.563	12.396	12.477	14.812	1.02514	0.0358171	0.911161	0.040405
Junction plakoglobin OS=Homo sapiens GN=JUP PE=1 SV=3	PLAK_HUMAN	543 kDa	9.574	1.8975	2.8143	4.76193	4.1186	5.6347	4.1588	4.63737	1.02686	0.0382416	0.962218	0.0167267
Dolichyl-diphosphooligosaccharide--protein glycosyltransferase subunit 1 OS=Homo sapiens GN=RPN1 PE=1 SV=1	RPN1_HUMAN	1110 kDa	41.168	35.104	48.781	41.6843	40.156	46.204	35.35	40.57	1.02747	0.039092	0.836203	0.0776884
Heterogeneous nuclear ribonucleoprotein F OS=Homo sapiens GN=HNRNPF PE=1 SV=3	HNRPF_HUMAN	1051 kDa	35.424	27.514	24.39	29.1093	28.83	27.046	29.112	28.3293	1.02753	0.0391851	0.827151	0.0824151
Gamma-glutamyl hydrolase OS=Homo sapiens GN=GGH PE=1 SV=2	GGH_HUMAN	290 kDa	1.9148	3.795	0.93809	2.21596	3.0889	3.3808	0	2.15657	1.02754	0.0391977	0.967459	0.0143673
Integrin beta-1 OS=Homo sapiens GN=ITGB1 PE=1 SV=2	ITB1_HUMAN	770 kDa	9.574	6.6412	12.195	9.47007	11.326	9.0155	7.278	9.2065	1.02863	0.0407218	0.900873	0.0453362
Chloride intracellular channel protein 4 OS=Homo sapiens GN=CLIC4 PE=1 SV=4	CLIC4_HUMAN	745 kDa	6.7018	7.59	12.195	8.82893	9.2668	10.142	6.2383	8.54903	1.03274	0.0464779	0.899113	0.0461856
Ubiquitin carboxyl-terminal hydrolase 5 OS=Homo sapiens GN=USP5 PE=1 SV=2	UBP5_HUMAN	656 kDa	7.6592	7.59	5.6286	6.95927	9.2668	6.7616	4.1588	6.72907	1.03421	0.0485289	0.893736	0.0487907
Cluster of Nucleoside diphosphate kinase B OS=Homo sapiens GN=NME2 PE=1 SV=1 (NDKB_HUMAN)	NDKB_HUMAN [2]	1193 kDa	99.57	109.11	124.77	111.15	113.26	95.79	113.33	107.46	1.03434	0.0487082	0.714135	0.14622
Ataxin-10 OS=Homo sapiens GN=ATXN10 PE=1 SV=1	ATX10_HUMAN	270 kDa	1.9148	1.8975	2.8143	2.20887	2.0593	2.2539	2.0794	2.13087	1.0366	0.051866	0.813151	0.0898289
Probable ATP-dependent RNA helicase DDX17 OS=Homo sapiens GN=DDX17 PE=1 SV=2	DDX17_HUMAN	969 kDa	19.148	17.077	23.452	19.8923	21.623	20.285	15.596	19.168	1.03779	0.0535127	0.795887	0.0991488
Cluster of Serine/arginine-rich splicing factor 4 OS=Homo sapiens GN=SRSF4 PE=1 SV=2 (SRSF4_HUMAN)	SRSF4_HUMAN	271 kDa	1.9148	2.8462	1.8762	2.2124	2.0593	2.2539	2.0794	2.13087	1.03826	0.0541719	0.813187	0.0898097
Cluster of EH domain-containing protein 1 OS=Homo sapiens GN=EHD1 PE=1 SV=2 (EHD1_HUMAN)	EHD1_HUMAN	272 kDa	1.9148	2.8462	1.8762	2.2124	2.0593	2.2539	2.0794	2.13087	1.03826	0.0541719	0.813187	0.0898097
Translin OS=Homo sapiens GN=TSN PE=1 SV=1	TSN_HUMAN	638 kDa	6.7018	8.5387	4.6905	6.64367	6.1779	6.7616	6.2383	6.3926	1.03927	0.0555769	0.834568	0.0785383
S-adenosylmethionine synthase isoform type-2 OS=Homo sapiens GN=MAT2A PE=1 SV=1	METK2_HUMAN	273 kDa	2.8722	1.8975	1.8762	2.2153	2.0593	2.2539	2.0794	2.13087	1.03962	0.0560618	0.813033	0.0898919
BAG family molecular chaperone regulator 2 OS=Homo sapiens GN=BAG2 PE=1 SV=1	BAG2_HUMAN	652 kDa	8.6166	7.59	4.6905	6.9657	9.2668	5.6347	5.1986	6.70003	1.03965	0.0561001	0.886362	0.0523889
Insulin-like growth factor 2 mRNA-binding protein 1 OS=Homo sapiens GN=IGF2BP1 PE=1 SV=2	IF2B1_HUMAN	1008 kDa	25.85	25.616	21.576	24.3473	21.623	23.666	24.953	23.414	1.03986	0.0563923	0.610681	0.214186
Profilin-1 OS=Homo sapiens GN=PFN1 PE=1 SV=2	PROF1_HUMAN	1146 kDa	57.444	63.566	50.657	57.2223	58.69	56.347	49.906	54.981	1.04077	0.0576452	0.648823	0.187873
Protein-L-isoaspartate(D-aspartate) O-methyltransferase OS=Homo sapiens GN=PCMT1 PE=1 SV=4	PIMT_HUMAN	720 kDa	9.574	7.59	7.5047	8.2229	5.1482	11.269	7.278	7.8984	1.04108	0.0580869	0.873802	0.0585872
Elongation factor 1-alpha 1 OS=Homo sapiens GN=EEF1A1 PE=1 SV=1	EF1A1_HUMAN	1224 kDa	529.44	565.45	566.61	553.833	495.26	557.83	538.57	530.553	1.04388	0.0619541	0.3528	0.452471
Heat shock 70 kDa protein 4 OS=Homo sapiens GN=HSPA4 PE=1 SV=4	HSP74_HUMAN	1041 kDa	26.807	36.052	21.576	28.145	27.8	27.046	25.993	26.9463	1.04448	0.0627897	0.792584	0.100955
GrpE protein homolog 1, mitochondrial OS=Homo sapiens GN=GRPEL1 PE=1 SV=2	GRPE1_HUMAN	728 kDa	9.574	7.59	8.4428	8.5356	8.2372	7.8886	8.3177	8.14783	1.04759	0.0670761	0.546606	0.262326
Proliferation-associated protein 2G4 OS=Homo sapiens GN=PA2G4 PE=1 SV=3	PA2G4_HUMAN	976 kDa	20.105	20.872	20.638	20.5383	17.504	22.539	18.715	19.586	1.04862	0.0684963	0.568393	0.245351
Elongation factor 2 OS=Homo sapiens GN=EEF2 PE=1 SV=4	EF2_HUMAN	1219 kDa	316.9	307.39	289.87	304.72	279.03	288.5	303.6	290.377	1.0494	0.0695587	0.250049	0.601975
Lysosome-associated membrane glycoprotein 1 OS=Homo sapiens GN=LAMP1 PE=1 SV=3	LAMP1_HUMAN	488 kDa	4.787	3.795	3.7524	4.11147	4.1186	4.5078	3.1191	3.91517	1.05014	0.0705794	0.731854	0.135576
Staphylococcal nuclease domain-containing protein 1 OS=Homo sapiens GN=SND1 PE=1 SV=1	SND1_HUMAN	894 kDa	12.446	12.334	18.762	14.514	15.445	13.523	12.477	13.815	1.0506	0.0712096	0.775895	0.110197
Small nuclear ribonucleoprotein Sm D3 OS=Homo sapiens GN=SNRPD3 PE=1 SV=1	SMD3_HUMAN	805 kDa	11.489	10.436	10.319	10.748	10.296	7.8886	12.477	10.2205	1.05161	0.0725977	0.721038	0.142042
Ubiquitin-like modifier-activating enzyme 1 OS=Homo sapiens GN=UBA1 PE=1 SV=3	UBA1_HUMAN	1074 kDa	33.509	37.001	34.709	35.073	37.067	33.808	29.112	33.329	1.05233	0.0735828	0.527887	0.277459
60S ribosomal protein L19 OS=Homo sapiens GN=RPL19 PE=1 SV=1	RL19_HUMAN	700 kDa	6.7018	8.5387	8.4428	7.89443	6.1779	9.0155	7.278	7.49047	1.05393	0.0757801	0.71206	0.147483
Translocon-associated protein subunit alpha OS=Homo sapiens GN=SSR1 PE=1 SV=3	SSRA_HUMAN	238 kDa	0.9574	1.8975	2.8143	1.88973	0	2.2539	3.1191	1.791	1.05513	0.0774173	0.931119	0.0309948
Peroxiredoxin-2 OS=Homo sapiens GN=PRDX2 PE=1 SV=5	PRDX2_HUMAN	1163 kDa	83.294	80.644	62.852	75.5967	73.105	68.743	72.78	71.5427	1.05667	0.0795187	0.570574	0.243688
Histidine triad nucleotide-binding protein 1 OS=Homo sapiens GN=HINT1 PE=1 SV=2	HINT1_HUMAN	858 kDa	14.361	7.59	15.948	12.633	14.415	7.8886	13.516	11.9399	1.05805	0.0814106	0.842823	0.0742636
26S protease regulatory subunit 6A OS=Homo sapiens GN=PSMC3 PE=1 SV=3	PRS6A_HUMAN	786 kDa	9.574	12.334	8.4428	10.1169	10.296	9.0155	9.3574	9.5563	1.05867	0.082248	0.669063	0.174533
Protein phosphatase 1G OS=Homo sapiens GN=PPM1G PE=1 SV=1	PPM1G_HUMAN	463 kDa	2.8722	3.795	4.6905	3.7859	3.0889	4.5078	3.1191	3.57193	1.0599	0.0839312	0.776109	0.110077
40S ribosomal protein S29 OS=Homo sapiens GN=RPS29 PE=1 SV=2	RS29_HUMAN	832 kDa	11.489	11.385	12.195	11.6897	11.326	12.396	9.3574	11.0265	1.06015	0.0842632	0.513253	0.289668
Microsomal glutathione S-transferase 1 OS=Homo sapiens GN=MGST1 PE=1 SV=1	MGST1_HUMAN	601 kDa	6.7018	7.59	3.7524	6.01473	7.2075	5.6347	4.1588	5.667	1.06136	0.0859156	0.822982	0.0846094
T-complex protein 1 subunit alpha OS=Homo sapiens GN=TCP1 PE=1 SV=1	TCPA_HUMAN	1027 kDa	29.679	27.514	24.39	27.1943	21.623	28.173	27.033	25.6097	1.06188	0.0866176	0.566138	0.247078
T-complex protein 1 subunit epsilon OS=Homo sapiens GN=CCT5 PE=1 SV=1	TCPE_HUMAN	1057 kDa	31.594	29.411	32.833	31.2793	33.978	30.427	23.913	29.4393	1.0625	0.0874648	0.586178	0.231971
Alcohol dehydrogenase [NADP(+)] OS=Homo sapiens GN=AKR1A1 PE=1 SV=3	AK1A1_HUMAN	772 kDa	8.6166	10.436	10.319	9.79053	9.2668	9.0155	9.3574	9.21323	1.06266	0.0876799	0.388134	0.411018
Interleukin enhancer-binding factor 2 OS=Homo sapiens GN=ILF2 PE=1 SV=2	ILF2_HUMAN	935 kDa	17.233	19.924	15.009	17.3887	17.504	18.031	13.516	16.3503	1.06351	0.0888273	0.633124	0.198511
Cluster of Putative protein FAM10A4 OS=Homo sapiens GN=ST13P4 PE=5 SV=1 (ST134_HUMAN)	ST134_HUMAN [2]	862 kDa	14.361	13.282	11.257	12.9667	9.2668	16.904	10.397	12.1893	1.06378	0.0891963	0.77549	0.110424
Annexin A7 OS=Homo sapiens GN=ANXA7 PE=1 SV=3	ANXA7_HUMAN	456 kDa	2.8722	5.6925	2.8143	3.793	5.1482	4.5078	1.0397	3.56523	1.06389	0.0893429	0.893082	0.0491088
Leukotriene A-4 hydrolase OS=Homo sapiens GN=LTA4H PE=1 SV=2	LKHA4_HUMAN	686 kDa	6.7018	7.59	8.4428	7.5782	6.1779	7.8886	7.278	7.11483	1.06513	0.0910253	0.549246	0.260233
Ras-related protein Rab-7a OS=Homo sapiens GN=RAB7A PE=1 SV=1	RAB7A_HUMAN	585 kDa	4.787	4.7437	7.5047	5.67847	4.1186	5.6347	6.2383	5.33053	1.06527	0.0912215	0.769547	0.113765
FACT complex subunit SSRP1 OS=Homo sapiens GN=SSRP1 PE=1 SV=1	SSRP1_HUMAN	251 kDa	0.9574	2.8462	2.8143	2.20597	3.0889	0	3.1191	2.06933	1.06603	0.0922449	0.915429	0.0383756
26S proteasome non-ATPase regulatory subunit 6 OS=Homo sapiens GN=PSMD6 PE=1 SV=1	PSMD6_HUMAN	687 kDa	9.574	6.6412	6.5666	7.59393	6.1779	7.8886	7.278	7.11483	1.06734	0.0940174	0.688152	0.162315
RNA-binding protein FUS OS=Homo sapiens GN=FUS PE=1 SV=1	FUS_HUMAN	900 kDa	13.404	16.129	15.948	15.1603	11.326	14.65	16.635	14.2037	1.06735	0.0940381	0.619679	0.207833
Kynureninase OS=Homo sapiens GN=KYNU PE=1 SV=1	KYNU_HUMAN	756 kDa	12.446	9.4875	6.5666	9.50003	8.2372	9.0155	9.3574	8.87003	1.07103	0.098993	0.73407	0.134262
Transmembrane emp24 domain-containing protein 9 OS=Homo sapiens GN=TMED9 PE=1 SV=2	TMED9_HUMAN	443 kDa	3.8296	3.795	3.7524	3.79233	4.1186	3.3808	3.1191	3.5395	1.07143	0.0995402	0.446902	0.349787
60S ribosomal protein L31 OS=Homo sapiens GN=RPL31 PE=1 SV=1	RL31_HUMAN	670 kDa	5.7444	7.59	8.4428	7.25907	6.1779	7.8886	6.2383	6.76827	1.07251	0.100998	0.640746	0.193314
Inorganic pyrophosphatase OS=Homo sapiens GN=PPA1 PE=1 SV=2	IPYR_HUMAN	822 kDa	8.6166	12.334	13.133	11.3612	12.356	9.0155	10.397	10.5895	1.07287	0.101481	0.672659	0.172205
Acyl carrier protein, mitochondrial OS=Homo sapiens GN=NDUFAB1 PE=1 SV=3	ACPM_HUMAN	755 kDa	11.489	8.5387	8.4428	9.49017	8.2372	7.8886	10.397	8.84093	1.07343	0.102235	0.63635	0.196304
Signal recognition particle 68 kDa protein OS=Homo sapiens GN=SRP68 PE=1 SV=2	SRP68_HUMAN	450 kDa	7.6592	0	3.7524	3.80387	3.0889	3.3808	4.1588	3.54283	1.07368	0.102563	0.912618	0.0397109
Catechol O-methyltransferase OS=Homo sapiens GN=COMT PE=1 SV=2	COMT_HUMAN	889 kDa	15.318	13.282	15.009	14.5363	13.385	15.777	11.437	13.533	1.07414	0.103182	0.514852	0.288318
Canalicular multispecific organic anion transporter 1 OS=Homo sapiens GN=ABCC2 PE=1 SV=3	MRP2_HUMAN	211 kDa	0.9574	1.8975	2.8143	1.88973	2.0593	1.1269	2.0794	1.7552	1.07665	0.106547	0.839179	0.0761454
Pescadillo homolog OS=Homo sapiens GN=PES1 PE=1 SV=1	PESC_HUMAN	436 kDa	2.8722	4.7437	3.7524	3.78943	3.0889	2.2539	5.1986	3.5138	1.07844	0.10895	0.80215	0.0957444
Splicing factor 1 OS=Homo sapiens GN=SF1 PE=1 SV=4	SF01_HUMAN	659 kDa	7.6592	7.59	6.5666	7.27193	8.2372	6.7616	5.1986	6.73247	1.08013	0.111204	0.598906	0.222642
Nucleoplasmin-3 OS=Homo sapiens GN=NPM3 PE=1 SV=3	NPM3_HUMAN	433 kDa	3.8296	3.795	3.7524	3.79233	4.1186	2.2539	4.1588	3.51043	1.0803	0.111437	0.677124	0.169332
Histone-arginine methyltransferase CARM1 OS=Homo sapiens GN=CARM1 PE=1 SV=3	CARM1_HUMAN	212 kDa	1.9148	1.8975	1.8762	1.89617	2.0593	1.1269	2.0794	1.7552	1.08031	0.11145	0.677105	0.169344
60S ribosomal protein L17 OS=Homo sapiens GN=RPL17 PE=1 SV=3	RL17_HUMAN	1006 kDa	21.063	24.667	28.143	24.6243	21.623	25.92	20.794	22.779	1.08101	0.11238	0.515322	0.287921
26S proteasome non-ATPase regulatory subunit 2 OS=Homo sapiens GN=PSMD2 PE=1 SV=3	PSMD2_HUMAN	910 kDa	18.191	14.231	15.009	15.8103	15.445	18.031	10.397	14.6243	1.0811	0.112497	0.66581	0.176649
Purine nucleoside phosphorylase OS=Homo sapiens GN=PNP PE=1 SV=2	PNPH_HUMAN	213 kDa	1.9148	2.8462	0.93809	1.8997	2.0593	1.1269	2.0794	1.7552	1.08232	0.114134	0.830938	0.0804313
Superoxide dismutase [Cu-Zn] OS=Homo sapiens GN=SOD1 PE=1 SV=2	SODC_HUMAN	1170 kDa	79.464	74.002	104.13	85.8653	116.35	65.362	56.144	79.2853	1.08299	0.115022	0.768527	0.114341
26S proteasome non-ATPase regulatory subunit 11 OS=Homo sapiens GN=PSMD11 PE=1 SV=3	PSD11_HUMAN	881 kDa	15.318	14.231	13.133	14.2273	13.385	13.523	12.477	13.1283	1.08371	0.115982	0.197063	0.705396
Serine hydroxymethyltransferase, cytosolic OS=Homo sapiens GN=SHMT1 PE=1 SV=1	GLYC_HUMAN	729 kDa	7.6592	9.4875	9.3809	8.84253	7.2075	7.8886	9.3574	8.15117	1.08482	0.117453	0.470338	0.32759
14-3-3 protein sigma OS=Homo sapiens GN=SFN PE=1 SV=1	1433S_HUMAN	1096 kDa	45.955	39.847	40.338	42.0467	43.245	42.824	30.152	38.7403	1.08535	0.118155	0.522356	0.282034
Trans-2,3-enoyl-CoA reductase OS=Homo sapiens GN=TECR PE=1 SV=1	TECR_HUMAN	727 kDa	7.6592	8.5387	10.319	8.83897	10.296	7.8886	6.2383	8.14097	1.08574	0.118678	0.647495	0.188764
Cluster of Interleukin enhancer-binding factor 3 OS=Homo sapiens GN=ILF3 PE=1 SV=3 (ILF3_HUMAN)	ILF3_HUMAN	1083 kDa	46.913	36.052	33.771	38.912	33.978	36.062	37.43	35.8233	1.08622	0.119316	0.500652	0.300464
Histone H2A.V OS=Homo sapiens GN=H2AFV PE=1 SV=3	H2AV_HUMAN	1076 kDa	35.424	36.052	37.524	36.3333	40.156	38.316	21.834	33.4353	1.08667	0.11992	0.646751	0.189263
Dipeptidyl peptidase 4 OS=Homo sapiens GN=DPP4 PE=1 SV=2	DPP4_HUMAN	717 kDa	9.574	7.59	8.4428	8.5356	8.2372	9.0155	6.2383	7.83033	1.09007	0.124419	0.522344	0.282044
Transitional endoplasmic reticulum ATPase OS=Homo sapiens GN=VCP PE=1 SV=4	TERA_HUMAN	1172 kDa	87.124	92.977	90.995	90.3653	67.957	90.155	90.455	82.8557	1.09064	0.125169	0.381598	0.418394
WD40 repeat-containing protein SMU1 OS=Homo sapiens GN=SMU1 PE=1 SV=2	SMU1_HUMAN	388 kDa	1.9148	1.8975	5.6286	3.14697	2.0593	4.5078	2.0794	2.88217	1.09188	0.126808	0.866996	0.0619828
Eukaryotic translation initiation factor 3 subunit C OS=Homo sapiens GN=EIF3C PE=1 SV=1	EIF3C_HUMAN	539 kDa	3.8296	3.795	7.5047	5.0431	4.1186	4.5078	5.1986	4.60833	1.09434	0.130066	0.749463	0.12525
Lamin-B2 OS=Homo sapiens GN=LMNB2 PE=1 SV=3	LMNB2_HUMAN	871 kDa	15.318	13.282	13.133	13.911	10.296	10.142	17.675	12.7043	1.09498	0.130905	0.664786	0.177318
SUMO-activating enzyme subunit 1 OS=Homo sapiens GN=SAE1 PE=1 SV=1	SAE1_HUMAN	405 kDa	3.8296	1.8975	4.6905	3.47253	3.0889	2.2539	4.1588	3.1672	1.0964	0.132781	0.773798	0.111372
40S ribosomal protein S19 OS=Homo sapiens GN=RPS19 PE=1 SV=2	RS19_HUMAN	1042 kDa	30.637	29.411	29.081	29.7097	26.771	32.681	21.834	27.0953	1.09649	0.132888	0.456005	0.34103
Protein kinase C and casein kinase substrate in neurons protein 2 OS=Homo sapiens GN=PACSIN2 PE=1 SV=2	PACN2_HUMAN	196 kDa	1.9148	0	3.7524	1.88907	3.0889	0	2.0794	1.72277	1.09653	0.132946	0.912069	0.0399723
Cluster of Plastin-3 OS=Homo sapiens GN=PLS3 PE=1 SV=4 (PLST_HUMAN)	PLST_HUMAN	394 kDa	2.8722	1.8975	5.6286	3.4661	5.1482	2.2539	2.0794	3.1605	1.09669	0.13316	0.848127	0.0715393
Guanine nucleotide-binding protein subunit beta-2-like 1 OS=Homo sapiens GN=GNB2L1 PE=1 SV=3	GBLP_HUMAN	1135 kDa	52.657	55.976	49.719	52.784	47.364	43.951	53.025	48.1133	1.09708	0.133664	0.218698	0.660155
Cytochrome c oxidase subunit 5B, mitochondrial OS=Homo sapiens GN=COX5B PE=1 SV=2	COX5B_HUMAN	625 kDa	6.7018	5.6925	7.5047	6.633	6.1779	6.7616	5.1986	6.04603	1.09708	0.133673	0.445807	0.350853
Acidic leucine-rich nuclear phosphoprotein 32 family member E OS=Homo sapiens GN=ANP32E PE=1 SV=1	AN32E_HUMAN	398 kDa	3.8296	1.8975	4.6905	3.47253	4.1186	2.2539	3.1191	3.16387	1.09756	0.1343	0.769887	0.113573
60S ribosomal protein L7a OS=Homo sapiens GN=RPL7A PE=1 SV=2	RL7A_HUMAN	1122 kDa	44.998	51.232	50.657	48.9623	44.275	41.697	47.827	44.5997	1.09782	0.134639	0.177256	0.751398
Peroxisomal 2,4-dienoyl-CoA reductase OS=Homo sapiens GN=DECR2 PE=1 SV=1	DECR2_HUMAN	192 kDa	0	3.795	1.8762	1.8904	4.1186	0	1.0397	1.71943	1.09943	0.136758	0.922557	0.0350066
UMP-CMP kinase OS=Homo sapiens GN=CMPK1 PE=1 SV=3	KCY_HUMAN	690 kDa	6.7018	7.59	9.3809	7.8909	6.1779	10.142	5.1986	7.17283	1.10011	0.137647	0.695173	0.157907
Poly [ADP-ribose] polymerase 1 OS=Homo sapiens GN=PARP1 PE=1 SV=4	PARP1_HUMAN	958 kDa	22.978	18.975	19.7	20.551	23.682	14.65	17.675	18.669	1.10081	0.138564	0.555113	0.255618
40S ribosomal protein S9 OS=Homo sapiens GN=RPS9 PE=1 SV=3	RS9_HUMAN	974 kDa	23.935	20.872	19.7	21.5023	18.534	20.285	19.755	19.5247	1.10129	0.139195	0.220912	0.655781
Adipocyte plasma membrane-associated protein OS=Homo sapiens GN=APMAP PE=1 SV=2	APMAP_HUMAN	854 kDa	11.489	11.385	15.948	12.9407	12.356	13.523	9.3574	11.7455	1.10176	0.139808	0.572996	0.241849
Pentatricopeptide repeat-containing protein 3, mitochondrial OS=Homo sapiens GN=PTCD3 PE=1 SV=3	PTCD3_HUMAN	193 kDa	1.9148	1.8975	1.8762	1.89617	4.1186	0	1.0397	1.71943	1.10279	0.141153	0.893266	0.0490194
Heterogeneous nuclear ribonucleoprotein U-like protein 1 OS=Homo sapiens GN=HNRNPUL1 PE=1 SV=2	HNRL1_HUMAN	688 kDa	7.6592	7.59	8.4428	7.89733	7.2075	9.0155	5.1986	7.14053	1.10599	0.145334	0.541661	0.266272
Pre-mRNA-processing-splicing factor 8 OS=Homo sapiens GN=PRPF8 PE=1 SV=2	PRP8_HUMAN	938 kDa	20.105	16.129	18.762	18.332	19.563	13.523	16.635	16.5737	1.10609	0.145471	0.449281	0.347482
Acetyl-CoA acetyltransferase, cytosolic OS=Homo sapiens GN=ACAT2 PE=1 SV=2	THIC_HUMAN	968 kDa	17.233	23.719	22.514	21.1553	20.593	16.904	19.755	19.084	1.10854	0.148658	0.415641	0.381282
UPF0670 protein THEM6 OS=Homo sapiens GN=THEM6 PE=1 SV=2	THEM6_HUMAN	610 kDa	6.7018	5.6925	6.5666	6.3203	8.2372	6.7616	2.0794	5.69273	1.11024	0.150872	0.755656	0.121676
Fatty acid synthase OS=Homo sapiens GN=FASN PE=1 SV=3	FAS_HUMAN	1207 kDa	148.4	165.08	171.67	161.717	144.15	127.34	165.31	145.6	1.11069	0.151458	0.28237	0.549182
T-complex protein 1 subunit eta OS=Homo sapiens GN=CCT7 PE=1 SV=2	TCPH_HUMAN	1004 kDa	26.807	24.667	24.39	25.288	24.711	21.412	21.834	22.6523	1.11635	0.158793	0.110045	0.958428
Neutral alpha-glucosidase AB OS=Homo sapiens GN=GANAB PE=1 SV=3	GANAB_HUMAN	1019 kDa	26.807	20.872	36.586	28.0883	26.771	24.793	23.913	25.159	1.11643	0.158896	0.563597	0.249032
Aldo-keto reductase family 1 member B10 OS=Homo sapiens GN=AKR1B10 PE=1 SV=2	AK1BA_HUMAN	1200 kDa	145.53	156.54	141.65	147.907	121.5	138.61	137.24	132.45	1.1167	0.159239	0.0941681	1.0261
Polypyrimidine tract-binding protein 1 OS=Homo sapiens GN=PTBP1 PE=1 SV=1	PTBP1_HUMAN	1138 kDa	54.572	56.925	52.533	54.6767	45.304	49.585	51.986	48.9583	1.1168	0.159371	0.0701303	1.15409
Cofilin-1 OS=Homo sapiens GN=CFL1 PE=1 SV=3	COF1_HUMAN	1162 kDa	87.124	73.054	78.8	79.6593	71.046	70.997	71.74	71.261	1.11785	0.160731	0.109355	0.961162
Small nuclear ribonucleoprotein-associated protein N OS=Homo sapiens GN=SNRPN PE=1 SV=1	RSMN_HUMAN	618 kDa	6.7018	5.6925	7.5047	6.633	5.1482	2.2539	10.397	5.93303	1.11798	0.160892	0.788476	0.103212
Heat shock cognate 71 kDa protein OS=Homo sapiens GN=HSPA8 PE=1 SV=1	HSP7C_HUMAN	1212 kDa	216.37	233.39	206.38	218.713	192.54	210.74	182.99	195.423	1.11918	0.162438	0.109043	0.962401
NADH-ubiquinone oxidoreductase 75 kDa subunit, mitochondrial OS=Homo sapiens GN=NDUFS1 PE=1 SV=3	NDUS1_HUMAN	749 kDa	7.6592	11.385	10.319	9.78773	12.356	4.5078	9.3574	8.7404	1.11983	0.163275	0.701316	0.154086
UPF0568 protein C14orf166 OS=Homo sapiens GN=C14orf166 PE=1 SV=1	CN166_HUMAN	674 kDa	8.6166	8.5387	6.5666	7.9073	8.2372	5.6347	7.278	7.04997	1.12161	0.165569	0.445259	0.351387
DAZ-associated protein 1 OS=Homo sapiens GN=DAZAP1 PE=1 SV=1	DAZP1_HUMAN	588 kDa	6.7018	5.6925	5.6286	6.00763	5.1482	6.7616	4.1588	5.3562	1.12162	0.165587	0.478572	0.320053
Enoyl-CoA hydratase, mitochondrial OS=Homo sapiens GN=ECHS1 PE=1 SV=4	ECHM_HUMAN	1069 kDa	40.211	37.001	28.143	35.1183	28.83	33.808	31.191	31.2763	1.12284	0.167153	0.378624	0.421792
rRNA 2'-O-methyltransferase fibrillarin OS=Homo sapiens GN=FBL PE=1 SV=2	FBRL_HUMAN	869 kDa	15.318	13.282	14.071	14.2237	13.385	9.0155	15.596	12.6655	1.12302	0.167389	0.48397	0.315181
60S ribosomal protein L24 OS=Homo sapiens GN=RPL24 PE=1 SV=1	RL24_HUMAN	736 kDa	10.531	8.5387	9.3809	9.48353	7.2075	5.6347	12.477	8.43973	1.12368	0.168227	0.652447	0.185455
Transketolase OS=Homo sapiens GN=TKT PE=1 SV=3	TKT_HUMAN	1097 kDa	43.083	43.642	44.09	43.605	32.949	41.697	41.588	38.7447	1.12545	0.170496	0.170497	0.768284
Cytochrome c oxidase subunit 4 isoform 1, mitochondrial OS=Homo sapiens GN=COX4I1 PE=1 SV=1	COX41_HUMAN	664 kDa	8.6166	6.6412	7.5047	7.5875	6.1779	6.7616	7.278	6.73917	1.12588	0.171054	0.264415	0.577713
Alpha-enolase OS=Homo sapiens GN=ENO1 PE=1 SV=2	ENOA_HUMAN	1223 kDa	473.91	565.45	484.06	507.807	432.45	474.44	439.8	448.897	1.13123	0.177896	0.136952	0.86343
40S ribosomal protein S25 OS=Homo sapiens GN=RPS25 PE=1 SV=1	RS25_HUMAN	850 kDa	13.404	13.282	13.133	13.273	9.2668	12.396	13.516	11.7263	1.1319	0.178751	0.291475	0.535399
4-hydroxyphenylpyruvate dioxygenase OS=Homo sapiens GN=HPD PE=1 SV=2	HPPD_HUMAN	570 kDa	4.787	6.6412	5.6286	5.6856	4.1186	6.7616	4.1588	5.013	1.13417	0.181638	0.547751	0.261417
Exportin-1 OS=Homo sapiens GN=XPO1 PE=1 SV=1	XPO1_HUMAN	779 kDa	10.531	8.5387	13.133	10.7342	14.415	5.6347	8.3177	9.4558	1.1352	0.182948	0.68397	0.164963
Galectin-3-binding protein OS=Homo sapiens GN=LGALS3BP PE=1 SV=1	LG3BP_HUMAN	567 kDa	7.6592	3.795	5.6286	5.69427	5.1482	6.7616	3.1191	5.00963	1.13666	0.184805	0.678642	0.168359
Peptidyl-prolyl cis-trans isomerase FKBP3 OS=Homo sapiens GN=FKBP3 PE=1 SV=1	FKBP3_HUMAN	344 kDa	2.8722	4.7437	0.93809	2.85133	3.0889	3.3808	1.0397	2.50313	1.1391	0.1879	0.805363	0.0940084
High mobility group protein B2 OS=Homo sapiens GN=HMGB2 PE=1 SV=2	HMGB2_HUMAN	965 kDa	19.148	22.77	22.514	21.4773	14.415	18.031	23.913	18.7863	1.14324	0.193131	0.420951	0.375769
Bifunctional purine biosynthesis protein PURH OS=Homo sapiens GN=ATIC PE=1 SV=3	PUR9_HUMAN	1117 kDa	51.7	52.181	45.028	49.6363	38.097	47.331	44.708	43.3787	1.14426	0.194411	0.156122	0.806535
T-complex protein 1 subunit theta OS=Homo sapiens GN=CCT8 PE=1 SV=4	TCPQ_HUMAN	1067 kDa	40.211	33.206	32.833	35.4167	32.949	33.808	25.993	30.9167	1.14555	0.196044	0.261724	0.582156
Nuclear pore membrane glycoprotein 210 OS=Homo sapiens GN=NUP210 PE=1 SV=3	PO210_HUMAN	324 kDa	0.9574	3.795	3.7524	2.83493	3.0889	2.2539	2.0794	2.47407	1.14586	0.19643	0.73372	0.13447
Large proline-rich protein BAG6 OS=Homo sapiens GN=BAG6 PE=1 SV=2	BAG6_HUMAN	335 kDa	2.8722	2.8462	2.8143	2.84423	2.0593	2.2539	3.1191	2.47743	1.14806	0.199194	0.323657	0.489915
Caldesmon OS=Homo sapiens GN=CALD1 PE=1 SV=3	CALD1_HUMAN	336 kDa	2.8722	3.795	1.8762	2.8478	2.0593	2.2539	3.1191	2.47743	1.1495	0.201002	0.595304	0.225261
Proteasome subunit beta type-4 OS=Homo sapiens GN=PSMB4 PE=1 SV=4	PSB4_HUMAN	464 kDa	3.8296	4.7437	3.7524	4.10857	3.0889	4.5078	3.1191	3.57193	1.15024	0.20193	0.396776	0.401455
Cluster of Core histone macro-H2A.1 OS=Homo sapiens GN=H2AFY PE=1 SV=4 (H2AY_HUMAN)	H2AY_HUMAN [2]	902 kDa	12.446	18.975	17.824	16.415	14.415	16.904	11.437	14.252	1.15177	0.20385	0.445485	0.351167
Integrin alpha-2 OS=Homo sapiens GN=ITGA2 PE=1 SV=1	ITA2_HUMAN	147 kDa	2.8722	0	1.8762	1.5828	4.1186	0	0	1.37287	1.15292	0.205287	0.902581	0.044514
Eukaryotic translation initiation factor 3 subunit J OS=Homo sapiens GN=EIF3J PE=1 SV=2	EIF3J_HUMAN	139 kDa	1.9148	0	1.8762	1.26367	1.0296	2.2539	0	1.0945	1.15456	0.207344	0.86121	0.0648909
Eukaryotic translation initiation factor 1b OS=Homo sapiens GN=EIF1B PE=1 SV=2	EIF1B_HUMAN (+1)	140 kDa	0.9574	1.8975	0.93809	1.26433	1.0296	2.2539	0	1.0945	1.15517	0.208101	0.826136	0.0829486
40S ribosomal protein S3 OS=Homo sapiens GN=RPS3 PE=1 SV=2	RS3_HUMAN	1048 kDa	34.467	34.155	29.081	32.5677	23.682	30.427	30.152	28.087	1.15953	0.213538	0.18623	0.72995
Eukaryotic translation initiation factor 5B OS=Homo sapiens GN=EIF5B PE=1 SV=4	IF2P_HUMAN	444 kDa	4.787	1.8975	5.6286	4.10437	4.1186	3.3808	3.1191	3.5395	1.15959	0.213614	0.654159	0.184317
Ribosome biogenesis protein BRX1 homolog OS=Homo sapiens GN=BRIX1 PE=1 SV=2	BRX1_HUMAN	445 kDa	4.787	2.8462	4.6905	4.1079	4.1186	3.3808	3.1191	3.5395	1.16059	0.214855	0.461624	0.335712
60S ribosomal protein L6 OS=Homo sapiens GN=RPL6 PE=1 SV=3	RL6_HUMAN	1037 kDa	33.509	29.411	30.019	30.9797	21.623	25.92	32.231	26.5913	1.16503	0.220366	0.258539	0.587475
Nucleophosmin OS=Homo sapiens GN=NPM1 PE=1 SV=2	NPM_HUMAN	1203 kDa	160.84	184.06	136.02	160.307	163.71	131.85	116.45	137.337	1.16725	0.223118	0.307288	0.512454
Acetyl-coenzyme A synthetase 2-like, mitochondrial OS=Homo sapiens GN=ACSS1 PE=1 SV=2	ACS2L_HUMAN	426 kDa	3.8296	2.8462	4.6905	3.78877	1.0296	4.5078	4.1588	3.23207	1.17224	0.229271	0.673685	0.171543
Succinate dehydrogenase [ubiquinone] flavoprotein subunit, mitochondrial OS=Homo sapiens GN=SDHA PE=1 SV=2	DHSA_HUMAN	662 kDa	8.6166	5.6925	9.3809	7.89667	7.2075	6.7616	6.2383	6.7358	1.17234	0.229394	0.372959	0.428339
High mobility group protein B1 OS=Homo sapiens GN=HMGB1 PE=1 SV=3	HMGB1_HUMAN	1077 kDa	42.126	39.847	38.462	40.145	25.741	36.062	40.549	34.1173	1.17667	0.234715	0.252529	0.597689
Mannosyl-oligosaccharide glucosidase OS=Homo sapiens GN=MOGS PE=1 SV=5	MOGS_HUMAN	653 kDa	7.6592	5.6925	10.319	7.89023	9.2668	5.6347	5.1986	6.70003	1.17764	0.2359	0.557075	0.254086
Mitochondrial-processing peptidase subunit alpha OS=Homo sapiens GN=PMPCA PE=1 SV=2	MPPA_HUMAN	521 kDa	4.787	4.7437	5.6286	5.0531	4.1186	5.6347	3.1191	4.2908	1.17766	0.235922	0.387017	0.41227
Ribosomal protein S6 kinase alpha-2 OS=Homo sapiens GN=RPS6KA2 PE=1 SV=2	KS6A2_HUMAN	421 kDa	3.8296	3.795	3.7524	3.79233	5.1482	4.5078	0	3.21867	1.17823	0.236623	0.741142	0.130099
Adenosylhomocysteinase OS=Homo sapiens GN=AHCY PE=1 SV=4	SAHH_HUMAN	1144 kDa	53.615	71.156	61.914	62.2283	45.304	50.712	62.383	52.7997	1.17857	0.237043	0.257468	0.589276
Obg-like ATPase 1 OS=Homo sapiens GN=OLA1 PE=1 SV=2	OLA1_HUMAN	800 kDa	12.446	11.385	11.257	11.696	9.2668	9.0155	11.437	9.90643	1.18065	0.239578	0.104787	0.979691
Tubulin-specific chaperone A OS=Homo sapiens GN=TBCA PE=1 SV=3	TBCA_HUMAN	748 kDa	10.531	9.4875	10.319	10.1125	7.2075	10.142	8.3177	8.55573	1.18196	0.241176	0.163296	0.787024
60S acidic ribosomal protein P0 OS=Homo sapiens GN=RPLP0 PE=1 SV=1	RLA0_HUMAN	993 kDa	25.85	29.411	20.638	25.2997	20.593	24.793	18.715	21.367	1.18405	0.243734	0.275667	0.559616
NADH dehydrogenase [ubiquinone] 1 alpha subcomplex subunit 5 OS=Homo sapiens GN=NDUFA5 PE=1 SV=3	NDUA5_HUMAN	274 kDa	1.9148	2.8462	2.8143	2.5251	2.0593	2.2539	2.0794	2.13087	1.18501	0.2449	0.274328	0.56173
Proteasome subunit alpha type-6 OS=Homo sapiens GN=PSMA6 PE=1 SV=1	PSA6_HUMAN	823 kDa	15.318	16.129	6.5666	12.6712	10.296	12.396	9.3574	10.6831	1.18609	0.246218	0.566954	0.246452
Pre-mRNA-processing factor 19 OS=Homo sapiens GN=PRPF19 PE=1 SV=1	PRP19_HUMAN	874 kDa	13.404	16.129	15.948	15.1603	14.415	13.523	10.397	12.7783	1.18641	0.246602	0.188097	0.725619
Ras GTPase-activating-like protein IQGAP2 OS=Homo sapiens GN=IQGAP2 PE=1 SV=4	IQGA2_HUMAN	583 kDa	8.6166	4.7437	5.6286	6.32963	5.1482	5.6347	5.1986	5.32717	1.18818	0.248754	0.444077	0.352542
ATP-dependent RNA helicase A OS=Homo sapiens GN=DHX9 PE=1 SV=4	DHX9_HUMAN	1078 kDa	43.083	34.155	45.028	40.7553	36.038	30.427	36.39	34.285	1.18872	0.249411	0.169421	0.771032
Heterogeneous nuclear ribonucleoprotein L-like OS=Homo sapiens GN=HNRPLL PE=1 SV=1	HNRLL_HUMAN	60 kDa	1.9148	0	1.8762	1.26367	2.0593	1.1269	0	1.06207	1.18982	0.250742	0.827777	0.0820868
Extended synaptotagmin-1 OS=Homo sapiens GN=ESYT1 PE=1 SV=1	ESYT1_HUMAN	742 kDa	10.531	8.5387	11.257	10.1089	9.2668	7.8886	8.3177	8.49103	1.19054	0.251614	0.14968	0.824836
CAD protein OS=Homo sapiens GN=CAD PE=1 SV=3	PYR1_HUMAN	845 kDa	11.489	14.231	15.948	13.8893	14.415	10.142	10.397	11.6513	1.19208	0.253482	0.303606	0.51769
Peptidyl-prolyl cis-trans isomerase A OS=Homo sapiens GN=PPIA PE=1 SV=2	PPIA_HUMAN	1204 kDa	158.93	174.57	159.48	164.327	142.09	129.6	141.4	137.697	1.1934	0.255073	0.0151484	1.81963
Vigilin OS=Homo sapiens GN=HDLBP PE=1 SV=2	VIGLN_HUMAN	780 kDa	5.7444	12.334	15.948	11.3421	11.326	6.7616	10.397	9.49487	1.19455	0.256472	0.605041	0.218215
40S ribosomal protein S18 OS=Homo sapiens GN=RPS18 PE=1 SV=3	RS18_HUMAN	842 kDa	15.318	12.334	13.133	13.595	9.2668	12.396	12.477	11.3799	1.19465	0.256584	0.184454	0.734112
60S ribosomal protein L5 OS=Homo sapiens GN=RPL5 PE=1 SV=3	RL5_HUMAN	1005 kDa	28.722	26.565	26.267	27.1847	23.682	24.793	19.755	22.7433	1.19528	0.257349	0.0604896	1.21832
Serine/arginine-rich splicing factor 2 OS=Homo sapiens GN=SRSF2 PE=1 SV=4	SRSF2_HUMAN	399 kDa	3.8296	3.795	3.7524	3.79233	4.1186	2.2539	3.1191	3.16387	1.19864	0.261397	0.308574	0.510641
40S ribosomal protein S5 OS=Homo sapiens GN=RPS5 PE=1 SV=4	RS5_HUMAN	1068 kDa	43.083	37.95	30.957	37.33	25.741	33.808	33.271	30.94	1.20653	0.270862	0.217826	0.66189
DNA replication licensing factor MCM6 OS=Homo sapiens GN=MCM6 PE=1 SV=1	MCM6_HUMAN	564 kDa	8.6166	2.8462	6.5666	6.0098	6.1779	5.6347	3.1191	4.97723	1.20746	0.271973	0.621686	0.206429
Cluster of Fatty aldehyde dehydrogenase OS=Homo sapiens GN=ALDH3A2 PE=1 SV=1 (AL3A2_HUMAN)	AL3A2_HUMAN	758 kDa	11.489	10.436	10.319	10.748	9.2668	10.142	7.278	8.8956	1.20824	0.272904	0.115893	0.935943
Cluster of Histone H2A type 1-D OS=Homo sapiens GN=HIST1H2AD PE=1 SV=2 (H2A1D_HUMAN)	H2A1D_HUMAN [10]	1186 kDa	119.68	127.13	105.07	117.293	99.876	105.93	85.256	97.0207	1.20895	0.273757	0.0855613	1.06772
Calmodulin OS=Homo sapiens GN=CALM1 PE=1 SV=2	CALM_HUMAN	1089 kDa	40.211	44.591	48.781	44.5277	38.097	34.935	37.43	36.8207	1.20931	0.274186	0.0439786	1.35676
Translocon-associated protein subunit delta OS=Homo sapiens GN=SSR4 PE=1 SV=1	SSRD_HUMAN	621 kDa	8.6166	7.59	5.6286	7.2784	6.1779	5.6347	6.2383	6.01697	1.20965	0.274585	0.232492	0.633592
Glucosamine-6-phosphate isomerase 1 OS=Homo sapiens GN=GNPDA1 PE=1 SV=1	GNPI1_HUMAN	33 kDa	0.9574	0.94875	1.8762	1.26078	1.0296	0	2.0794	1.03633	1.21658	0.282832	0.756041	0.121455
Mitochondrial import receptor subunit TOM70 OS=Homo sapiens GN=TOMM70A PE=1 SV=1	TOM70_HUMAN	67 kDa	0.9574	0.94875	1.8762	1.26078	2.0593	0	1.0397	1.033	1.22051	0.28748	0.750765	0.124496
DnaJ homolog subfamily A member 3, mitochondrial OS=Homo sapiens GN=DNAJA3 PE=1 SV=2	DNJA3_HUMAN	52 kDa	1.9148	0.94875	0.93809	1.26721	2.0593	0	1.0397	1.033	1.22673	0.294819	0.746785	0.126804
60S ribosomal protein L11 OS=Homo sapiens GN=RPL11 PE=1 SV=2	RL11_HUMAN	698 kDa	9.574	10.436	7.5047	9.17157	6.1779	7.8886	8.3177	7.4614	1.2292	0.297722	0.191082	0.718779
Cluster of Myosin light polypeptide 6 OS=Homo sapiens GN=MYL6 PE=1 SV=2 (MYL6_HUMAN)	MYL6_HUMAN [2]	879 kDa	19.148	16.129	13.133	16.1367	11.326	12.396	15.596	13.106	1.23124	0.300115	0.233035	0.632579
Calcium-binding mitochondrial carrier protein Aralar2 OS=Homo sapiens GN=SLC25A13 PE=1 SV=2	CMC2_HUMAN	641 kDa	10.531	6.6412	6.5666	7.91293	7.2075	7.8886	4.1588	6.4183	1.23287	0.302021	0.438878	0.357657
Ran-specific GTPase-activating protein OS=Homo sapiens GN=RANBP1 PE=1 SV=1	RANG_HUMAN	937 kDa	20.105	18.026	22.514	20.215	13.385	19.158	16.635	16.3927	1.23317	0.302376	0.14502	0.838572
Glutamate--cysteine ligase catalytic subunit OS=Homo sapiens GN=GCLC PE=1 SV=2	GSH1_HUMAN	596 kDa	7.6592	7.59	5.6286	6.95927	6.1779	4.5078	6.2383	5.64133	1.23362	0.302899	0.206233	0.685643
COP9 signalosome complex subunit 3 OS=Homo sapiens GN=COPS3 PE=1 SV=3	CSN3_HUMAN	234 kDa	1.9148	1.8975	2.8143	2.20887	1.0296	2.2539	2.0794	1.78763	1.23564	0.305255	0.436462	0.360053
Transaldolase OS=Homo sapiens GN=TALDO1 PE=1 SV=2	TALDO_HUMAN	1050 kDa	42.126	34.155	28.143	34.808	25.741	31.554	27.033	28.1093	1.23831	0.30837	0.203931	0.690516
60S ribosomal protein L36 OS=Homo sapiens GN=RPL36 PE=1 SV=3	RL36_HUMAN	905 kDa	17.233	21.821	14.071	17.7083	10.296	18.031	14.556	14.2943	1.23884	0.308985	0.342448	0.465406
Thioredoxin OS=Homo sapiens GN=TXN PE=1 SV=3	THIO_HUMAN	986 kDa	22.02	28.462	27.205	25.8957	22.652	20.285	19.755	20.8973	1.23919	0.309392	0.0819888	1.08625
60S ribosomal protein L27 OS=Homo sapiens GN=RPL27 PE=1 SV=2	RL27_HUMAN	924 kDa	22.02	16.129	19.7	19.283	17.504	13.523	15.596	15.541	1.24078	0.31125	0.143933	0.841839
Cluster of Unconventional myosin-Ib OS=Homo sapiens GN=MYO1B PE=2 SV=3 (MYO1B_HUMAN)	MYO1B_HUMAN [2]	759 kDa	11.489	10.436	11.257	11.0607	8.2372	10.142	8.3177	8.89897	1.24292	0.313729	0.0365126	1.43756
Ubiquitin-conjugating enzyme E2 N OS=Homo sapiens GN=UBE2N PE=1 SV=1	UBE2N_HUMAN	685 kDa	8.6166	8.5387	9.3809	8.8454	7.2075	7.8886	6.2383	7.11147	1.24382	0.31478	0.0342483	1.46536
Ubiquitin-conjugating enzyme E2 L3 OS=Homo sapiens GN=UBE2L3 PE=1 SV=1	UB2L3_HUMAN	847 kDa	14.361	8.5387	20.638	14.5126	12.356	10.142	12.477	11.6583	1.24482	0.315941	0.469372	0.328483
T-complex protein 1 subunit gamma OS=Homo sapiens GN=CCT3 PE=1 SV=4	TCPG_HUMAN	1115 kDa	51.7	52.181	56.286	53.389	42.215	37.189	48.866	42.7567	1.24867	0.320393	0.0446507	1.35017
Apoptosis-inducing factor 1, mitochondrial OS=Homo sapiens GN=AIFM1 PE=1 SV=1	AIFM1_HUMAN	578 kDa	3.8296	6.6412	9.3809	6.61723	6.1779	4.5078	5.1986	5.29477	1.24977	0.321661	0.473773	0.324429
Zyxin OS=Homo sapiens GN=ZYX PE=1 SV=1	ZYX_HUMAN	221 kDa	1.9148	1.8975	2.8143	2.20887	0	1.1269	4.1588	1.7619	1.25368	0.326174	0.744208	0.128306
Glycine dehydrogenase [decarboxylating], mitochondrial OS=Homo sapiens GN=GLDC PE=1 SV=2	GCSP_HUMAN	675 kDa	10.531	6.6412	9.3809	8.85103	8.2372	5.6347	7.278	7.04997	1.25547	0.328229	0.262297	0.581207
Splicing factor, proline- and glutamine-rich OS=Homo sapiens GN=SFPQ PE=1 SV=2	SFPQ_HUMAN	1016 kDa	29.679	27.514	34.709	30.634	21.623	19.158	32.231	24.3373	1.25872	0.331963	0.23788	0.623642
mRNA turnover protein 4 homolog OS=Homo sapiens GN=MRTO4 PE=1 SV=2	MRT4_HUMAN	220 kDa	2.8722	1.8975	1.8762	2.2153	1.0296	1.1269	3.1191	1.75853	1.25974	0.333129	0.578298	0.237848
Importin-4 OS=Homo sapiens GN=IPO4 PE=1 SV=2	IPO4_HUMAN	428 kDa	3.8296	3.795	4.6905	4.10503	2.0593	5.6347	2.0794	3.2578	1.26006	0.333496	0.526913	0.278261
60S ribosomal protein L22 OS=Homo sapiens GN=RPL22 PE=1 SV=2	RL22_HUMAN	673 kDa	11.489	3.795	11.257	8.847	8.2372	4.5078	8.3177	7.0209	1.26009	0.333532	0.552855	0.257389
Eukaryotic peptide chain release factor subunit 1 OS=Homo sapiens GN=ETF1 PE=1 SV=3	ERF1_HUMAN	516 kDa	6.7018	3.795	5.6286	5.37513	3.0889	4.5078	5.1986	4.2651	1.26026	0.333721	0.350693	0.455073
Pre-mRNA-processing factor 6 OS=Homo sapiens GN=PRPF6 PE=1 SV=1	PRP6_HUMAN	214 kDa	1.9148	2.8462	1.8762	2.2124	2.0593	1.1269	2.0794	1.7552	1.26048	0.333977	0.36364	0.439328
40S ribosomal protein S27 OS=Homo sapiens GN=RPS27 PE=1 SV=3	RS27_HUMAN	437 kDa	6.7018	3.795	2.8143	4.43703	3.0889	2.2539	5.1986	3.5138	1.26274	0.336563	0.561375	0.250747
Dipeptidyl peptidase 3 OS=Homo sapiens GN=DPP3 PE=1 SV=2	DPP3_HUMAN	204 kDa	1.9148	2.8462	1.8762	2.2124	3.0889	1.1269	1.0397	1.75183	1.26291	0.336747	0.567586	0.245969
Calpain-1 catalytic subunit OS=Homo sapiens GN=CAPN1 PE=1 SV=1	CAN1_HUMAN	504 kDa	5.7444	5.6925	4.6905	5.3758	7.2075	4.5078	1.0397	4.25167	1.2644	0.338451	0.569773	0.244298
Gamma-enolase OS=Homo sapiens GN=ENO2 PE=1 SV=3	ENOG_HUMAN	1171 kDa	96.698	114.8	92.871	101.456	79.283	99.171	61.343	79.9323	1.26928	0.344008	0.169204	0.771589
Coatomer subunit alpha OS=Homo sapiens GN=COPA PE=1 SV=2	COPA_HUMAN	1025 kDa	32.552	24.667	40.338	32.519	28.83	28.173	19.755	25.586	1.27097	0.345928	0.267397	0.572843
T-complex protein 1 subunit beta OS=Homo sapiens GN=CCT2 PE=1 SV=4	TCPB_HUMAN	1105 kDa	57.444	48.386	45.967	50.599	36.038	42.824	40.549	39.8037	1.27121	0.346208	0.0550003	1.25963
Ras GTPase-activating protein-binding protein 1 OS=Homo sapiens GN=G3BP1 PE=1 SV=1	G3BP1_HUMAN	655 kDa	8.6166	8.5387	8.4428	8.5327	8.2372	5.6347	6.2383	6.7034	1.27289	0.348109	0.0810211	1.0914
N-alpha-acetyltransferase 10 OS=Homo sapiens GN=NAA10 PE=1 SV=1	NAA10_HUMAN	337 kDa	1.9148	3.795	3.7524	3.15407	2.0593	2.2539	3.1191	2.47743	1.27312	0.348367	0.388554	0.410549
Heterogeneous nuclear ribonucleoprotein K OS=Homo sapiens GN=HNRNPK PE=1 SV=1	HNRPK_HUMAN	1182 kDa	122.55	107.21	117.26	115.673	101.93	81.139	88.376	90.4817	1.27842	0.354359	0.0292158	1.53438
Phenylalanine--tRNA ligase beta subunit OS=Homo sapiens GN=FARSB PE=1 SV=3	SYFB_HUMAN	325 kDa	4.787	2.8462	1.8762	3.1698	3.0889	2.2539	2.0794	2.47407	1.28121	0.357507	0.487449	0.312071
Cluster of Ribosomal protein S6 kinase alpha-3 OS=Homo sapiens GN=RPS6KA3 PE=1 SV=1 (KS6A3_HUMAN)	KS6A3_HUMAN [3]	723 kDa	5.7444	10.436	15.009	10.3965	10.296	6.7616	7.278	8.11187	1.28164	0.357987	0.473845	0.324364
Cluster of Septin-11 OS=Homo sapiens GN=SEPT11 PE=1 SV=3 (SEP11_HUMAN)	SEP11_HUMAN	495 kDa	5.7444	5.6925	3.7524	5.0631	3.0889	5.6347	3.1191	3.94757	1.28259	0.359057	0.355359	0.449332
Splicing factor 3A subunit 1 OS=Homo sapiens GN=SF3A1 PE=1 SV=1	SF3A1_HUMAN	411 kDa	2.8722	4.7437	4.6905	4.10213	4.1186	3.3808	2.0794	3.19293	1.28475	0.361492	0.348343	0.457993
Sec1 family domain-containing protein 1 OS=Homo sapiens GN=SCFD1 PE=1 SV=4	SCFD1_HUMAN	306 kDa	0.9574	4.7437	3.7524	3.15117	2.0593	1.1269	4.1588	2.44833	1.28707	0.364086	0.652204	0.185616
Exportin-2 OS=Homo sapiens GN=CSE1L PE=1 SV=3	XPO2_HUMAN	868 kDa	16.276	16.129	15.948	16.1177	13.385	15.777	8.3177	12.4932	1.29011	0.367496	0.174967	0.757045
NADH dehydrogenase [ubiquinone] flavoprotein 1, mitochondrial OS=Homo sapiens GN=NDUFV1 PE=1 SV=4	NDUV1_HUMAN	406 kDa	6.7018	1.8975	3.7524	4.11723	5.1482	3.3808	1.0397	3.18957	1.29084	0.368315	0.640019	0.193807
Peptidyl-prolyl cis-trans isomerase FKBP4 OS=Homo sapiens GN=FKBP4 PE=1 SV=3	FKBP4_HUMAN	681 kDa	12.446	7.59	7.5047	9.18023	8.2372	7.8886	5.1986	7.10813	1.29151	0.36906	0.335484	0.474328
Heterogeneous nuclear ribonucleoproteins A2/B1 OS=Homo sapiens GN=HNRNPA2B1 PE=1 SV=2	ROA2_HUMAN	1161 kDa	93.825	92.029	88.181	91.345	68.986	69.87	72.78	70.5453	1.29484	0.372775	0.000502888	3.29853
Protein DJ-1 OS=Homo sapiens GN=PARK7 PE=1 SV=2	PARK7_HUMAN	987 kDa	24.892	19.924	36.586	27.134	20.593	20.285	21.834	20.904	1.29803	0.376323	0.277577	0.556617
Peroxiredoxin-4 OS=Homo sapiens GN=PRDX4 PE=1 SV=1	PRDX4_HUMAN	1035 kDa	40.211	28.462	33.771	34.148	30.889	29.3	18.715	26.3013	1.29834	0.376665	0.199622	0.699793
Leucine-rich repeat-containing protein 59 OS=Homo sapiens GN=LRRC59 PE=1 SV=1	LRC59_HUMAN	1086 kDa	45.955	49.335	45.967	47.0857	36.038	39.443	33.271	36.2507	1.29889	0.37728	0.00681059	2.16682
Glyceraldehyde-3-phosphate dehydrogenase OS=Homo sapiens GN=GAPDH PE=1 SV=3	G3P_HUMAN	1216 kDa	325.52	334.91	340.53	333.653	270.8	243.42	252.65	255.623	1.30525	0.38433	0.00104058	2.98273
Cluster of ATP-dependent RNA helicase DDX3X OS=Homo sapiens GN=DDX3X PE=1 SV=3 (DDX3X_HUMAN)	DDX3X_HUMAN [2]	984 kDa	25.85	27.514	27.205	26.8563	20.593	20.285	20.794	20.5573	1.30641	0.385609	0.000291332	3.53561
Perilipin-3 OS=Homo sapiens GN=PLIN3 PE=1 SV=3	PLIN3_HUMAN	930 kDa	17.233	24.667	20.638	20.846	15.445	15.777	16.635	15.9523	1.30677	0.386003	0.0879085	1.05597
40S ribosomal protein S3a OS=Homo sapiens GN=RPS3A PE=1 SV=2	RS3A_HUMAN	1043 kDa	32.552	37.95	37.524	36.0087	26.771	22.539	33.271	27.527	1.30812	0.387497	0.0763222	1.11735
Aspartyl aminopeptidase OS=Homo sapiens GN=DNPEP PE=1 SV=1	DNPEP_HUMAN	471 kDa	3.8296	3.795	7.5047	5.0431	5.1482	2.2539	4.1588	3.85363	1.30866	0.388092	0.470914	0.327059
Elongation factor 1-beta OS=Homo sapiens GN=EEF1B2 PE=1 SV=3	EF1B_HUMAN	797 kDa	11.489	14.231	13.133	12.951	11.326	7.8886	10.397	9.87053	1.31209	0.391864	0.0767827	1.11474
Paraspeckle component 1 OS=Homo sapiens GN=PSPC1 PE=1 SV=1	PSPC1_HUMAN	469 kDa	4.787	4.7437	4.6905	4.7404	3.0889	5.6347	2.0794	3.601	1.31641	0.396611	0.342188	0.465735
60S acidic ribosomal protein P2 OS=Homo sapiens GN=RPLP2 PE=1 SV=1	RLA2_HUMAN	1058 kDa	37.339	38.899	40.338	38.8587	27.8	32.681	28.072	29.5177	1.31645	0.396658	0.00662776	2.17863
Protein transport protein Sec24D OS=Homo sapiens GN=SEC24D PE=1 SV=2	SC24D_HUMAN	113 kDa	0.9574	0.94875	0.93809	0.94808	1.0296	1.1269	0	0.718833	1.31891	0.399351	0.559455	0.252235
Prolyl endopeptidase OS=Homo sapiens GN=PREP PE=1 SV=2	PPCE_HUMAN	293 kDa	3.8296	3.795	0.93809	2.85423	1.0296	3.3808	2.0794	2.16327	1.31941	0.39989	0.588069	0.230572
Cluster of Nucleolar RNA helicase 2 OS=Homo sapiens GN=DDX21 PE=1 SV=5 (DDX21_HUMAN)	DDX21_HUMAN [2]	819 kDa	13.404	11.385	16.886	13.8917	13.385	6.7616	11.437	10.5279	1.31951	0.400007	0.255747	0.592189
Histone H2A type 2-B OS=Homo sapiens GN=HIST2H2AB PE=1 SV=3	H2A2B_HUMAN	1024 kDa	34.467	29.411	37.524	33.8007	30.889	27.046	18.715	25.55	1.32292	0.403728	0.127576	0.894231
Glycogen phosphorylase, liver form OS=Homo sapiens GN=PYGL PE=1 SV=4	PYGL_HUMAN	465 kDa	4.787	3.795	5.6286	4.73687	3.0889	4.5078	3.1191	3.57193	1.32614	0.407228	0.174754	0.757573
F-actin-capping protein subunit alpha-2 OS=Homo sapiens GN=CAPZA2 PE=1 SV=3	CAZA2_HUMAN	467 kDa	5.7444	3.795	4.6905	4.7433	2.0593	4.5078	4.1588	3.5753	1.32669	0.407827	0.286175	0.543369
Dolichyl-diphosphooligosaccharide--protein glycosyltransferase 48 kDa subunit OS=Homo sapiens GN=DDOST PE=1 SV=4	OST48_HUMAN	857 kDa	17.233	14.231	15.948	15.804	17.504	6.7616	11.437	11.9009	1.32797	0.409223	0.293318	0.532662
ATP-citrate synthase OS=Homo sapiens GN=ACLY PE=1 SV=3	ACLY_HUMAN	892 kDa	21.063	18.026	15.948	18.3457	16.474	12.396	12.477	13.7823	1.3311	0.412619	0.0851	1.07007
Translocation protein SEC63 homolog OS=Homo sapiens GN=SEC63 PE=1 SV=2	SEC63_HUMAN	275 kDa	1.9148	2.8462	3.7524	2.8378	2.0593	2.2539	2.0794	2.13087	1.33176	0.413333	0.256196	0.591428
Monocarboxylate transporter 4 OS=Homo sapiens GN=SLC16A3 PE=1 SV=1	MOT4_HUMAN	276 kDa	1.9148	2.8462	3.7524	2.8378	2.0593	2.2539	2.0794	2.13087	1.33176	0.413333	0.256196	0.591428
Histone H1.5 OS=Homo sapiens GN=HIST1H1B PE=1 SV=3	H15_HUMAN	461 kDa	5.7444	6.6412	1.8762	4.75393	4.1186	4.5078	2.0794	3.5686	1.33216	0.413763	0.510919	0.291648
Fructosamine-3-kinase OS=Homo sapiens GN=FN3K PE=1 SV=1	FN3K_HUMAN	277 kDa	1.9148	3.795	2.8143	2.84137	2.0593	2.2539	2.0794	2.13087	1.33343	0.415145	0.263379	0.579419
Beta-enolase OS=Homo sapiens GN=ENO3 PE=1 SV=4	ENOB_HUMAN	1185 kDa	118.72	138.52	121.01	126.083	96.787	113.82	71.74	94.1157	1.33966	0.421871	0.0803664	1.09493
Far upstream element-binding protein 2 OS=Homo sapiens GN=KHSRP PE=1 SV=4	FUBP2_HUMAN	771 kDa	13.404	14.231	9.3809	12.3386	10.296	9.0155	8.3177	9.20973	1.33974	0.421951	0.123224	0.909306
Phenylalanine--tRNA ligase alpha subunit OS=Homo sapiens GN=FARSA PE=1 SV=3	SYFA_HUMAN	559 kDa	8.6166	3.795	7.5047	6.63877	5.1482	4.5078	5.1986	4.95153	1.34075	0.42304	0.316337	0.49985
39S ribosomal protein L44, mitochondrial OS=Homo sapiens GN=MRPL44 PE=1 SV=1	RM44_HUMAN	278 kDa	4.787	2.8462	0.93809	2.8571	2.0593	2.2539	2.0794	2.13087	1.34081	0.42311	0.549616	0.259941
Cytochrome b5 OS=Homo sapiens GN=CYB5A PE=1 SV=2	CYB5_HUMAN	740 kDa	11.489	7.59	15.009	11.3627	8.2372	6.7616	10.397	8.46527	1.34227	0.424674	0.291849	0.534841
Mitochondrial import inner membrane translocase subunit Tim13 OS=Homo sapiens GN=TIMM13 PE=1 SV=1	TIM13_HUMAN	376 kDa	3.8296	3.795	3.7524	3.79233	2.0593	2.2539	4.1588	2.824	1.34289	0.425346	0.221974	0.653698
60S ribosomal protein L13 OS=Homo sapiens GN=RPL13 PE=1 SV=4	RL13_HUMAN	739 kDa	9.574	14.231	10.319	11.3747	9.2668	6.7616	9.3574	8.46193	1.34422	0.426765	0.157245	0.803423
Villin-1 OS=Homo sapiens GN=VIL1 PE=1 SV=4	VILI_HUMAN	1082 kDa	47.87	46.489	48.781	47.7133	38.097	37.189	31.191	35.4923	1.34433	0.426885	0.00572449	2.24226
Cluster of Histone H1.2 OS=Homo sapiens GN=HIST1H1C PE=1 SV=2 (H12_HUMAN)	H12_HUMAN [4]	1149 kDa	84.251	78.746	75.047	79.348	64.868	64.235	47.827	58.9767	1.34541	0.42805	0.0301214	1.52112
Probable ATP-dependent RNA helicase DDX5 OS=Homo sapiens GN=DDX5 PE=1 SV=1	DDX5_HUMAN	964 kDa	24.892	21.821	29.081	25.2647	18.534	18.031	19.755	18.7733	1.34577	0.428436	0.0400314	1.3976
Cluster of Glutamate dehydrogenase 1, mitochondrial OS=Homo sapiens GN=GLUD1 PE=1 SV=2 (DHE3_HUMAN)	DHE3_HUMAN [2]	1157 kDa	102.44	85.387	86.305	91.3773	70.016	65.362	67.581	67.653	1.35068	0.433682	0.0141074	1.85055
Malate dehydrogenase, cytoplasmic OS=Homo sapiens GN=MDH1 PE=1 SV=4	MDHC_HUMAN	995 kDa	29.679	31.309	27.205	29.3977	20.593	22.539	21.834	21.6553	1.35753	0.440979	0.00423849	2.37279
Annexin A4 OS=Homo sapiens GN=ANXA4 PE=1 SV=4	ANXA4_HUMAN	1168 kDa	106.27	120.49	91.933	106.231	79.283	74.378	81.098	78.253	1.35753	0.440987	0.0300028	1.52284
Splicing factor 3B subunit 1 OS=Homo sapiens GN=SF3B1 PE=1 SV=3	SF3B1_HUMAN	919 kDa	22.978	18.026	20.638	20.5473	20.593	10.142	14.556	15.097	1.36102	0.444689	0.179046	0.747036
Sequestosome-1 OS=Homo sapiens GN=SQSTM1 PE=1 SV=1	SQSTM_HUMAN	663 kDa	10.531	8.5387	8.4428	9.17083	7.2075	6.7616	6.2383	6.7358	1.36151	0.445204	0.0296994	1.52725
Cluster of Phosphoglycerate kinase 1 OS=Homo sapiens GN=PGK1 PE=1 SV=3 (PGK1_HUMAN)	PGK1_HUMAN [2]	1167 kDa	101.48	103.41	113.51	106.133	74.134	73.251	86.296	77.8937	1.36254	0.4463	0.00737854	2.13203
Activator of 90 kDa heat shock protein ATPase homolog 1 OS=Homo sapiens GN=AHSA1 PE=1 SV=1	AHSA1_HUMAN	660 kDa	10.531	10.436	6.5666	9.17787	8.2372	6.7616	5.1986	6.73247	1.36322	0.447024	0.195064	0.709822
Eukaryotic translation initiation factor 3 subunit A OS=Homo sapiens GN=EIF3A PE=1 SV=1	EIF3A_HUMAN	911 kDa	20.105	20.872	19.7	20.2257	13.385	11.269	19.755	14.803	1.36632	0.450298	0.102804	0.98799
Putative pre-mRNA-splicing factor ATP-dependent RNA helicase DHX15 OS=Homo sapiens GN=DHX15 PE=1 SV=2	DHX15_HUMAN	692 kDa	9.574	8.5387	12.195	10.1026	11.326	5.6347	5.1986	7.38643	1.36772	0.451772	0.294578	0.5308
Metaxin-2 OS=Homo sapiens GN=MTX2 PE=1 SV=1	MTX2_HUMAN	156 kDa	1.9148	0	3.7524	1.88907	2.0593	0	2.0794	1.37957	1.36932	0.453458	0.711829	0.147624
Proteasome subunit alpha type-2 OS=Homo sapiens GN=PSMA2 PE=1 SV=2	PSA2_HUMAN	492 kDa	4.787	6.6412	4.6905	5.3729	3.0889	4.5078	4.1588	3.9185	1.37116	0.455399	0.130039	0.885925
Cluster of Lamina-associated polypeptide 2, isoforms beta/gamma OS=Homo sapiens GN=TMPO PE=1 SV=2 (LAP2B_HUMAN)	LAP2B_HUMAN [2]	157 kDa	1.9148	0.94875	2.8143	1.89262	2.0593	0	2.0794	1.37957	1.37189	0.456167	0.589221	0.229722
Argininosuccinate lyase OS=Homo sapiens GN=ASL PE=1 SV=4	ARLY_HUMAN	158 kDa	1.9148	1.8975	1.8762	1.89617	2.0593	0	2.0794	1.37957	1.37447	0.458871	0.495604	0.304865
Desmoglein-2 OS=Homo sapiens GN=DSG2 PE=1 SV=2	DSG2_HUMAN	159 kDa	1.9148	1.8975	1.8762	1.89617	2.0593	0	2.0794	1.37957	1.37447	0.458871	0.495604	0.304865
Hsp90 co-chaperone Cdc37 OS=Homo sapiens GN=CDC37 PE=1 SV=1	CDC37_HUMAN	821 kDa	10.531	18.026	15.009	14.522	12.356	7.8886	11.437	10.5605	1.37512	0.459557	0.197818	0.703734
40S ribosomal protein S16 OS=Homo sapiens GN=RPS16 PE=1 SV=2	RS16_HUMAN	903 kDa	22.02	20.872	15.948	19.6133	14.415	16.904	11.437	14.252	1.37618	0.46067	0.0931689	1.03073
Activated RNA polymerase II transcriptional coactivator p15 OS=Homo sapiens GN=SUB1 PE=1 SV=3	TCP4_HUMAN	816 kDa	16.276	17.077	9.3809	14.2446	9.2668	12.396	9.3574	10.3401	1.37762	0.462173	0.214699	0.668169
Stress-induced-phosphoprotein 1 OS=Homo sapiens GN=STIP1 PE=1 SV=1	STIP1_HUMAN	1017 kDa	33.509	32.257	36.586	34.1173	23.682	22.539	28.072	24.7643	1.37768	0.462241	0.0116014	1.93549
40S ribosomal protein S7 OS=Homo sapiens GN=RPS7 PE=1 SV=1	RS7_HUMAN	1088 kDa	44.998	55.027	50.657	50.2273	37.067	33.808	38.469	36.448	1.37805	0.462633	0.0127826	1.89338
Adenylosuccinate synthetase isozyme 2 OS=Homo sapiens GN=ADSS PE=1 SV=3	PURA2_HUMAN	50 kDa	0.9574	0.94875	0.93809	0.94808	2.0593	0	0	0.686433	1.38117	0.465889	0.722468	0.141181
Dynein light chain 1, cytoplasmic OS=Homo sapiens GN=DYNLL1 PE=1 SV=1	DYL1_HUMAN	713 kDa	10.531	10.436	11.257	10.7413	8.2372	6.7616	8.3177	7.77217	1.38203	0.466784	0.00641121	2.19306
S-adenosylmethionine synthase isoform type-1 OS=Homo sapiens GN=MAT1A PE=1 SV=2	METK1_HUMAN	349 kDa	2.8722	3.795	3.7524	3.4732	2.0593	3.3808	2.0794	2.5065	1.38568	0.470591	0.142588	0.845916
Glutaredoxin-3 OS=Homo sapiens GN=GLRX3 PE=1 SV=2	GLRX3_HUMAN	350 kDa	4.787	3.795	1.8762	3.48607	2.0593	3.3808	2.0794	2.5065	1.39081	0.475926	0.365113	0.437573
ADP-sugar pyrophosphatase OS=Homo sapiens GN=NUDT5 PE=1 SV=1	NUDT5_HUMAN	701 kDa	9.574	10.436	11.257	10.4223	6.1779	9.0155	7.278	7.49047	1.39141	0.476551	0.0376808	1.42388
Peroxiredoxin-1 OS=Homo sapiens GN=PRDX1 PE=1 SV=1	PRDX1_HUMAN	1199 kDa	169.46	216.31	165.1	183.623	155.48	139.74	99.812	131.677	1.39449	0.479742	0.0897266	1.04708
40S ribosomal protein S24 OS=Homo sapiens GN=RPS24 PE=1 SV=1	RS24_HUMAN	602 kDa	8.6166	10.436	4.6905	7.91437	7.2075	5.6347	4.1588	5.667	1.39657	0.481889	0.304633	0.516223
BRCA2 and CDKN1A-interacting protein OS=Homo sapiens GN=BCCIP PE=1 SV=1	BCCIP_HUMAN	509 kDa	2.8722	7.59	7.5047	5.98897	4.1186	4.5078	4.1588	4.26173	1.40529	0.490867	0.331251	0.479843
60S acidic ribosomal protein P1 OS=Homo sapiens GN=RPLP1 PE=1 SV=1	RLA1_HUMAN	908 kDa	21.063	23.719	16.886	20.556	14.415	15.777	13.516	14.5693	1.41091	0.496625	0.0460111	1.33714
Replication protein A 14 kDa subunit OS=Homo sapiens GN=RPA3 PE=1 SV=1	RFA3_HUMAN	226 kDa	1.9148	0.94875	4.6905	2.51802	2.0593	2.2539	1.0397	1.7843	1.41121	0.49693	0.568698	0.245118
Cell division control protein 42 homolog OS=Homo sapiens GN=CDC42 PE=1 SV=2	CDC42_HUMAN	803 kDa	16.276	15.18	11.257	14.2377	8.2372	14.65	7.278	10.0551	1.41597	0.50179	0.205645	0.686881
Macrophage migration inhibitory factor OS=Homo sapiens GN=MIF PE=1 SV=4	MIF_HUMAN	988 kDa	23.935	32.257	32.833	29.675	21.623	21.412	19.755	20.93	1.41782	0.503676	0.0407511	1.38986
40S ribosomal protein SA OS=Homo sapiens GN=RPSA PE=1 SV=4	RSSA_HUMAN	954 kDa	25.85	25.616	26.267	25.911	18.534	11.269	24.953	18.252	1.41963	0.50551	0.125037	0.902961
Agmatinase, mitochondrial OS=Homo sapiens GN=AGMAT PE=1 SV=2	SPEB_HUMAN	878 kDa	8.6166	19.924	27.205	18.5819	13.385	11.269	14.556	13.07	1.42172	0.507636	0.372404	0.428986
Heterochromatin protein 1-binding protein 3 OS=Homo sapiens GN=HP1BP3 PE=1 SV=1	HP1B3_HUMAN	305 kDa	2.8722	4.7437	2.8143	3.47673	3.0889	1.1269	3.1191	2.44497	1.422	0.507918	0.322227	0.491838
Cathepsin B OS=Homo sapiens GN=CTSB PE=1 SV=3	CATB_HUMAN	939 kDa	25.85	19.924	25.329	23.701	15.445	15.777	18.715	16.6457	1.42385	0.509801	0.0309274	1.50966
Actin-related protein 2 OS=Homo sapiens GN=ACTR2 PE=1 SV=1	ARP2_HUMAN	643 kDa	9.574	5.6925	12.195	9.15383	5.1482	7.8886	6.2383	6.42503	1.42471	0.510672	0.253937	0.595275
Importin-7 OS=Homo sapiens GN=IPO7 PE=1 SV=1	IPO7_HUMAN	644 kDa	7.6592	9.4875	10.319	9.15523	5.1482	7.8886	6.2383	6.42503	1.42493	0.510893	0.0711833	1.14762
Proteasome subunit alpha type-5 OS=Homo sapiens GN=PSMA5 PE=1 SV=3	PSA5_HUMAN	575 kDa	5.7444	7.59	9.3809	7.57177	7.2075	4.5078	4.1588	5.29137	1.43097	0.51699	0.184746	0.733425
ELAV-like protein 1 OS=Homo sapiens GN=ELAVL1 PE=1 SV=2	ELAV1_HUMAN	631 kDa	9.574	8.5387	9.3809	9.16453	7.2075	5.6347	6.2383	6.36017	1.44093	0.526997	0.0073352	2.13459
Cluster of 60S ribosomal protein L3 OS=Homo sapiens GN=RPL3 PE=1 SV=2 (RL3_HUMAN)	RL3_HUMAN [2]	1000 kDa	32.552	35.104	29.081	32.2457	26.771	23.666	16.635	22.3573	1.44229	0.528357	0.0463855	1.33362
Ribonucleoprotein PTB-binding 1 OS=Homo sapiens GN=RAVER1 PE=1 SV=1	RAVR1_HUMAN	215 kDa	3.8296	1.8975	1.8762	2.53443	2.0593	1.1269	2.0794	1.7552	1.44396	0.530028	0.339904	0.468644
Ribonuclease inhibitor OS=Homo sapiens GN=RNH1 PE=1 SV=2	RINI_HUMAN	751 kDa	13.404	11.385	13.133	12.6407	8.2372	4.5078	13.516	8.75367	1.44404	0.530113	0.221797	0.654044
Dolichyl-diphosphooligosaccharide--protein glycosyltransferase subunit STT3A OS=Homo sapiens GN=STT3A PE=1 SV=2	STT3A_HUMAN	295 kDa	3.8296	3.795	2.8143	3.47963	6.1779	0	1.0397	2.40587	1.44631	0.532379	0.609148	0.215277
Protein transport protein Sec23A OS=Homo sapiens GN=SEC23A PE=1 SV=2	SC23A_HUMAN	856 kDa	19.148	15.18	16.886	17.0713	13.385	15.777	6.2383	11.8001	1.44671	0.532777	0.162928	0.788003
Cluster of Sodium/potassium-transporting ATPase subunit alpha-1 OS=Homo sapiens GN=ATP1A1 PE=1 SV=1 (AT1A1_HUMAN)	AT1A1_HUMAN [5]	1062 kDa	41.168	45.54	45.028	43.912	36.038	24.793	30.152	30.3277	1.44792	0.533981	0.0183022	1.7375
Putative peptidyl-tRNA hydrolase PTRHD1 OS=Homo sapiens GN=PTRHD1 PE=1 SV=1	PTRD1_HUMAN	361 kDa	3.8296	2.8462	5.6286	4.10147	4.1186	2.2539	2.0794	2.8173	1.45581	0.541827	0.285995	0.543642
Transcription elongation factor A protein 1 OS=Homo sapiens GN=TCEA1 PE=1 SV=2	TCEA1_HUMAN	371 kDa	3.8296	4.7437	3.7524	4.10857	3.0889	2.2539	3.1191	2.82063	1.45661	0.542616	0.0391131	1.40768
Serine/arginine-rich splicing factor 1 OS=Homo sapiens GN=SRSF1 PE=1 SV=2	SRSF1_HUMAN	783 kDa	14.361	13.282	14.071	13.9047	9.2668	7.8886	11.437	9.5308	1.45892	0.5449	0.015571	1.80768
Bifunctional ATP-dependent dihydroxyacetone kinase/FAD-AMP lyase (cyclizing) OS=Homo sapiens GN=DAK PE=1 SV=2	DHAK_HUMAN	1098 kDa	44.998	68.31	58.162	57.1567	35.008	38.316	43.668	38.9973	1.46566	0.551546	0.0653199	1.18495
Thimet oligopeptidase OS=Homo sapiens GN=THOP1 PE=1 SV=2	THOP1_HUMAN	422 kDa	2.8722	5.6925	5.6286	4.7311	3.0889	4.5078	2.0794	3.22537	1.46684	0.552712	0.266259	0.574696
Rho GTPase-activating protein 1 OS=Homo sapiens GN=ARHGAP1 PE=1 SV=1	RHG01_HUMAN	561 kDa	7.6592	6.6412	7.5047	7.26837	4.1186	4.5078	6.2383	4.9549	1.4669	0.552775	0.0330984	1.48019
Thioredoxin domain-containing protein 5 OS=Homo sapiens GN=TXNDC5 PE=1 SV=2	TXND5_HUMAN	1036 kDa	45.955	38.899	31.895	38.9163	23.682	23.666	32.231	26.5263	1.46708	0.552951	0.0669394	1.17432
Proteasome activator complex subunit 1 OS=Homo sapiens GN=PSME1 PE=1 SV=1	PSME1_HUMAN	721 kDa	10.531	13.282	11.257	11.69	4.1186	13.523	6.2383	7.95997	1.4686	0.554441	0.276757	0.557902
S-methyl-5'-thioadenosine phosphorylase OS=Homo sapiens GN=MTAP PE=1 SV=2	MTAP_HUMAN	520 kDa	4.787	6.6412	7.5047	6.31097	5.1482	5.6347	2.0794	4.28743	1.47197	0.557747	0.214163	0.669255
Splicing factor U2AF 65 kDa subunit OS=Homo sapiens GN=U2AF2 PE=1 SV=4	U2AF2_HUMAN	754 kDa	13.404	14.231	11.257	12.964	10.296	6.7616	9.3574	8.805	1.47235	0.558116	0.0393531	1.40502
60S ribosomal protein L15 OS=Homo sapiens GN=RPL15 PE=1 SV=2	RL15_HUMAN	734 kDa	15.318	11.385	10.319	12.3407	9.2668	3.3808	12.477	8.37487	1.47354	0.559282	0.265582	0.575802
NADH dehydrogenase [ubiquinone] 1 alpha subcomplex subunit 10, mitochondrial OS=Homo sapiens GN=NDUFA10 PE=1 SV=1	NDUAA_HUMAN	279 kDa	2.8722	1.8975	4.6905	3.1534	2.0593	2.2539	2.0794	2.13087	1.47987	0.565468	0.280815	0.55158
60S ribosomal protein L23 OS=Homo sapiens GN=RPL23 PE=1 SV=1	RL23_HUMAN	768 kDa	16.276	15.18	9.3809	13.6123	7.2075	7.8886	12.477	9.19103	1.48104	0.566612	0.177435	0.750962
ATPase family AAA domain-containing protein 3B OS=Homo sapiens GN=ATAD3B PE=1 SV=1	ATD3B_HUMAN	280 kDa	2.8722	2.8462	3.7524	3.15693	2.0593	2.2539	2.0794	2.13087	1.48153	0.567083	0.0279574	1.5535
Methionine aminopeptidase 2 OS=Homo sapiens GN=METAP2 PE=1 SV=1	AMPM2_HUMAN	135 kDa	1.9148	2.8462	0	1.587	0	1.1269	2.0794	1.06877	1.48489	0.570355	0.641644	0.192706
Protein FAM162A OS=Homo sapiens GN=FAM162A PE=1 SV=2	F162A_HUMAN	267 kDa	3.8296	1.8975	3.7524	3.15983	3.0889	2.2539	1.0397	2.1275	1.48523	0.570689	0.299911	0.523007
26S protease regulatory subunit 6B OS=Homo sapiens GN=PSMC4 PE=1 SV=2	PRS6B_HUMAN	418 kDa	6.7018	4.7437	2.8143	4.75327	2.0593	3.3808	4.1588	3.19963	1.48557	0.571013	0.291159	0.535871
Microtubule-associated protein RP/EB family member 1 OS=Homo sapiens GN=MAPRE1 PE=1 SV=3	MARE1_HUMAN	632 kDa	5.7444	9.4875	13.133	9.45497	7.2075	5.6347	6.2383	6.36017	1.48659	0.572008	0.229012	0.640142
V-type proton ATPase catalytic subunit A OS=Homo sapiens GN=ATP6V1A PE=1 SV=2	VATA_HUMAN	627 kDa	9.574	10.436	7.5047	9.17157	5.1482	11.269	2.0794	6.16553	1.48755	0.572942	0.349186	0.456944
High mobility group protein HMGI-C OS=Homo sapiens GN=HMGA2 PE=1 SV=1	HMGA2_HUMAN	836 kDa	16.276	18.975	15.009	16.7533	10.296	7.8886	15.596	11.2602	1.48784	0.573216	0.098393	1.00704
Rab GDP dissociation inhibitor beta OS=Homo sapiens GN=GDI2 PE=1 SV=2	GDIB_HUMAN	1148 kDa	81.379	87.285	90.057	86.2403	47.364	60.855	65.502	57.907	1.48929	0.574625	0.00921728	2.0354
Heterogeneous nuclear ribonucleoprotein M OS=Homo sapiens GN=HNRNPM PE=1 SV=3	HNRPM_HUMAN	1039 kDa	41.168	37.001	42.214	40.1277	24.711	25.92	30.152	26.9277	1.4902	0.575508	0.00451361	2.34548
E3 ubiquitin-protein ligase HUWE1 OS=Homo sapiens GN=HUWE1 PE=1 SV=3	HUWE1_HUMAN	268 kDa	5.7444	2.8462	0.93809	3.17623	3.0889	2.2539	1.0397	2.1275	1.49294	0.578156	0.527812	0.277521
Tyrosine-protein kinase BAZ1B OS=Homo sapiens GN=BAZ1B PE=1 SV=2	BAZ1B_HUMAN	171 kDa	1.9148	2.8462	0	1.587	2.0593	1.1269	0	1.06207	1.49426	0.579428	0.636434	0.196247
60S ribosomal protein L10a OS=Homo sapiens GN=RPL10A PE=1 SV=2	RL10A_HUMAN	1033 kDa	36.381	41.745	39.4	39.1753	22.652	29.3	25.993	25.9817	1.50781	0.592452	0.00590593	2.22871
Triosephosphate isomerase OS=Homo sapiens GN=TPI1 PE=1 SV=3	TPIS_HUMAN	1183 kDa	117.76	165.08	130.39	137.743	87.52	89.028	96.693	91.0803	1.51233	0.596771	0.0318519	1.49686
UDP-glucose 6-dehydrogenase OS=Homo sapiens GN=UGDH PE=1 SV=1	UGDH_HUMAN	1201 kDa	194.35	210.62	199.81	201.593	136.94	120.58	141.4	132.973	1.51604	0.600311	0.000981913	3.00793
Aldose reductase OS=Homo sapiens GN=AKR1B1 PE=1 SV=3	ALDR_HUMAN	702 kDa	10.531	11.385	12.195	11.3703	6.1779	9.0155	7.278	7.49047	1.51797	0.602147	0.0153444	1.81405
Protein transport protein Sec23B OS=Homo sapiens GN=SEC23B PE=1 SV=2	SC23B_HUMAN	528 kDa	7.6592	5.6925	7.5047	6.95213	4.1186	3.3808	6.2383	4.57923	1.51819	0.60235	0.089599	1.0477
UDP-glucose 4-epimerase OS=Homo sapiens GN=GALE PE=1 SV=2	GALE_HUMAN	38 kDa	1.9148	0.94875	1.8762	1.57992	0	0	3.1191	1.0397	1.51959	0.603681	0.64516	0.190333
NADH dehydrogenase [ubiquinone] 1 alpha subcomplex subunit 9, mitochondrial OS=Homo sapiens GN=NDUFA9 PE=1 SV=2	NDUA9_HUMAN	351 kDa	6.7018	3.795	0.93809	3.81163	2.0593	3.3808	2.0794	2.5065	1.5207	0.604734	0.490309	0.30953
UDP-glucose:glycoprotein glucosyltransferase 1 OS=Homo sapiens GN=UGGT1 PE=1 SV=3	UGGG1_HUMAN	761 kDa	13.404	12.334	15.009	13.5823	8.2372	11.269	7.278	8.92807	1.52131	0.605312	0.0313771	1.50339
U2 snRNP-associated SURP motif-containing protein OS=Homo sapiens GN=U2SURP PE=1 SV=2	SR140_HUMAN	118 kDa	1.9148	1.8975	0.93809	1.58346	1.0296	0	2.0794	1.03633	1.52795	0.611595	0.467084	0.330605
Nucleolar complex protein 3 homolog OS=Homo sapiens GN=NOC3L PE=1 SV=1	NOC3L_HUMAN	93 kDa	0	2.8462	1.8762	1.57413	3.0889	0	0	1.02963	1.52883	0.612427	0.702366	0.153437
Cluster of Aldo-keto reductase family 1 member C3 OS=Homo sapiens GN=AKR1C3 PE=1 SV=4 (AK1C3_HUMAN)	AK1C3_HUMAN [3]	1220 kDa	456.68	484.81	471.86	471.117	348.02	308.78	267.21	308.003	1.52958	0.613138	0.00272759	2.56422
Delta(24)-sterol reductase OS=Homo sapiens GN=DHCR24 PE=1 SV=2	DHC24_HUMAN	60 kDa	1.9148	1.8975	0.93809	1.58346	2.0593	0	1.0397	1.033	1.53288	0.616243	0.461439	0.335886
Cleavage and polyadenylation specificity factor subunit 5 OS=Homo sapiens GN=NUDT21 PE=1 SV=1	CPSF5_HUMAN	178 kDa	1.9148	1.8975	2.8143	2.20887	2.0593	2.2539	0	1.43773	1.53635	0.61951	0.379931	0.420296
Peptidyl-tRNA hydrolase 2, mitochondrial OS=Homo sapiens GN=PTRH2 PE=1 SV=1	PTH2_HUMAN	19 kDa	3.8296	0.94875	0	1.59278	2.0593	0	1.0397	1.033	1.5419	0.62471	0.688024	0.162397
Eukaryotic translation initiation factor 3 subunit F OS=Homo sapiens GN=EIF3F PE=1 SV=1	EIF3F_HUMAN	549 kDa	7.6592	5.6925	9.3809	7.57753	6.1779	2.2539	6.2383	4.89003	1.54959	0.631884	0.188021	0.725795
Cluster of Serine/threonine-protein phosphatase 2A 65 kDa regulatory subunit A alpha isoform OS=Homo sapiens GN=PPP2R1A PE=1 SV=4 (2AAA_HUMAN)	2AAA_HUMAN	960 kDa	29.679	20.872	36.586	29.0457	22.652	15.777	17.675	18.7013	1.55313	0.635182	0.106763	0.971579
U1 small nuclear ribonucleoprotein 70 kDa OS=Homo sapiens GN=SNRNP70 PE=1 SV=2	RU17_HUMAN	475 kDa	3.8296	6.6412	7.5047	5.99183	4.1186	2.2539	5.1986	3.85703	1.55348	0.635506	0.202969	0.692571
60S ribosomal protein L27a OS=Homo sapiens GN=RPL27A PE=1 SV=2	RL27A_HUMAN	787 kDa	16.276	14.231	14.071	14.8593	9.2668	9.0155	10.397	9.55977	1.55436	0.636322	0.00305016	2.51568
PDZ and LIM domain protein 5 OS=Homo sapiens GN=PDLIM5 PE=1 SV=5	PDLI5_HUMAN	299 kDa	3.8296	3.795	3.7524	3.79233	5.1482	1.1269	1.0397	2.43827	1.55534	0.63723	0.374319	0.426759
Glucose-6-phosphate 1-dehydrogenase OS=Homo sapiens GN=G6PD PE=1 SV=4	G6PD_HUMAN	841 kDa	22.02	15.18	15.948	17.716	12.356	12.396	9.3574	11.3698	1.55816	0.639846	0.0564018	1.24871
Desmoplakin OS=Homo sapiens GN=DSP PE=1 SV=3	DESP_HUMAN	925 kDa	25.85	25.616	21.576	24.3473	22.652	16.904	7.278	15.6113	1.55959	0.64117	0.136263	0.865622
Protein SEC13 homolog OS=Homo sapiens GN=SEC13 PE=1 SV=3	SEC13_HUMAN	372 kDa	4.787	2.8462	5.6286	4.4206	3.0889	2.2539	3.1191	2.82063	1.56724	0.648223	0.140183	0.853305
ATP synthase-coupling factor 6, mitochondrial OS=Homo sapiens GN=ATP5J PE=1 SV=1	ATP5J_HUMAN	362 kDa	5.7444	3.795	3.7524	4.4306	4.1186	2.2539	2.0794	2.8173	1.57264	0.653189	0.156445	0.805639
116 kDa U5 small nuclear ribonucleoprotein component OS=Homo sapiens GN=EFTUD2 PE=1 SV=1	U5S1_HUMAN	735 kDa	15.318	14.231	10.319	13.2893	10.296	5.6347	9.3574	8.42937	1.57655	0.656773	0.079769	1.09817
Phosphoglucomutase-1 OS=Homo sapiens GN=PGM1 PE=1 SV=3	PGM1_HUMAN	413 kDa	4.787	6.6412	3.7524	5.0602	3.0889	3.3808	3.1191	3.19627	1.58316	0.662807	0.0934215	1.02955
Puromycin-sensitive aminopeptidase OS=Homo sapiens GN=NPEPPS PE=1 SV=2	PSA_HUMAN	890 kDa	22.978	21.821	19.7	21.4997	15.445	16.904	8.3177	13.5556	1.58604	0.665429	0.0480151	1.31862
Protein S100-A1 OS=Homo sapiens GN=S100A1 PE=1 SV=2	S10A1_HUMAN	227 kDa	1.9148	3.795	2.8143	2.84137	2.0593	2.2539	1.0397	1.7843	1.59243	0.671227	0.184874	0.733125
Myristoylated alanine-rich C-kinase substrate OS=Homo sapiens GN=MARCKS PE=1 SV=4	MARCS_HUMAN	757 kDa	12.446	15.18	15.009	14.2117	6.1779	9.0155	11.437	8.8768	1.60099	0.678964	0.0386222	1.41316
U4/U6.U5 tri-snRNP-associated protein 2 OS=Homo sapiens GN=USP39 PE=1 SV=2	SNUT2_HUMAN	395 kDa	5.7444	5.6925	3.7524	5.0631	5.1482	2.2539	2.0794	3.1605	1.60199	0.679868	0.185583	0.731461
Cluster of Serine/threonine-protein kinase MAK OS=Homo sapiens GN=MAK PE=1 SV=2 (MAK_HUMAN)	MAK_HUMAN	166 kDa	2.8722	2.8462	0.93809	2.21883	1.0296	0	3.1191	1.3829	1.60448	0.682102	0.496548	0.304039
Fibronectin OS=Homo sapiens GN=FN1 PE=1 SV=4	FINC_HUMAN	440 kDa	4.787	5.6925	6.5666	5.68203	5.1482	3.3808	2.0794	3.53613	1.60685	0.684235	0.104897	0.979239
Epoxide hydrolase 1 OS=Homo sapiens GN=EPHX1 PE=1 SV=1	HYEP_HUMAN	1030 kDa	44.998	37.001	43.152	41.717	26.771	27.046	23.913	25.91	1.61007	0.687126	0.00378753	2.42164
Guanidinoacetate N-methyltransferase OS=Homo sapiens GN=GAMT PE=1 SV=1	GAMT_HUMAN	160 kDa	3.8296	1.8975	0.93809	2.22173	2.0593	0	2.0794	1.37957	1.61045	0.687468	0.484702	0.314525
Ribosome-binding protein 1 OS=Homo sapiens GN=RRBP1 PE=1 SV=4	RRBP1_HUMAN	876 kDa	21.063	21.821	19.7	20.8613	11.326	16.904	10.397	12.8757	1.62021	0.696184	0.0197971	1.7034
Cytoplasmic dynein 1 heavy chain 1 OS=Homo sapiens GN=DYNC1H1 PE=1 SV=5	DYHC1_HUMAN	1072 kDa	48.828	46.489	64.728	53.3483	37.067	31.554	30.152	32.9243	1.62033	0.696289	0.0287058	1.54203
B-cell receptor-associated protein 31 OS=Homo sapiens GN=BCAP31 PE=1 SV=3	BAP31_HUMAN	510 kDa	4.787	8.5387	7.5047	6.94347	4.1186	4.5078	4.1588	4.26173	1.62926	0.704216	0.075782	1.12043
Histone-binding protein RBBP4 OS=Homo sapiens GN=RBBP4 PE=1 SV=3	RBBP4_HUMAN	636 kDa	12.446	9.4875	9.3809	10.4381	7.2075	6.7616	5.1986	6.38923	1.63371	0.708149	0.0261283	1.58289
60S ribosomal protein L35 OS=Homo sapiens GN=RPL35 PE=1 SV=2	RL35_HUMAN	851 kDa	21.063	17.077	19.7	19.28	7.2075	12.396	15.596	11.7332	1.64321	0.716513	0.0495527	1.30493
40S ribosomal protein S11 OS=Homo sapiens GN=RPS11 PE=1 SV=3	RS11_HUMAN	966 kDa	30.637	31.309	30.957	30.9677	18.534	19.158	18.715	18.8023	1.64701	0.719851	1.41611e-06	5.8489
40S ribosomal protein S21 OS=Homo sapiens GN=RPS21 PE=1 SV=1	RS21_HUMAN	338 kDa	4.787	3.795	3.7524	4.11147	2.0593	2.2539	3.1191	2.47743	1.65957	0.730807	0.0253248	1.59645
Hypoxanthine-guanine phosphoribosyltransferase OS=Homo sapiens GN=HPRT1 PE=1 SV=2	HPRT_HUMAN	25 kDa	0	0	1.8762	0.6254	0	1.1269	0	0.375633	1.66492	0.735454	0.749311	0.125338
Fascin OS=Homo sapiens GN=FSCN1 PE=1 SV=3	FSCN1_HUMAN	1100 kDa	65.103	63.566	67.543	65.404	38.097	33.808	45.747	39.2173	1.66773	0.737887	0.00205837	2.68648
Nicalin OS=Homo sapiens GN=NCLN PE=1 SV=2	NCLN_HUMAN	552 kDa	7.6592	7.59	9.3809	8.21003	5.1482	3.3808	6.2383	4.92243	1.66788	0.738016	0.0319913	1.49497
40S ribosomal protein S28 OS=Homo sapiens GN=RPS28 PE=1 SV=1	RS28_HUMAN	609 kDa	9.574	12.334	6.5666	9.49153	4.1186	5.6347	7.278	5.6771	1.6719	0.741487	0.114963	0.93944
Galactokinase OS=Homo sapiens GN=GALK1 PE=1 SV=1	GALK1_HUMAN	42 kDa	0.9574	0	2.8143	1.25723	0	2.2539	0	0.7513	1.67341	0.742791	0.673985	0.17135
Eukaryotic translation initiation factor 3 subunit I OS=Homo sapiens GN=EIF3I PE=1 SV=1	EIF3I_HUMAN	247 kDa	2.8722	2.8462	4.6905	3.46963	4.1186	0	2.0794	2.066	1.6794	0.747943	0.352882	0.452371
Cluster of V-type proton ATPase subunit B, brain isoform OS=Homo sapiens GN=ATP6V1B2 PE=1 SV=3 (VATB2_HUMAN)	VATB2_HUMAN [2]	466 kDa	5.7444	6.6412	5.6286	6.00473	3.0889	4.5078	3.1191	3.57193	1.68109	0.749395	0.0127354	1.89499
Cytosolic 10-formyltetrahydrofolate dehydrogenase OS=Homo sapiens GN=ALDH1L1 PE=1 SV=2	AL1L1_HUMAN	99 kDa	0.9574	0	0.93809	0.63183	0	1.1269	0	0.375633	1.68204	0.750211	0.629278	0.201157
U2 small nuclear ribonucleoprotein A' OS=Homo sapiens GN=SNRPA1 PE=1 SV=2	RU2A_HUMAN	28 kDa	0.9574	0	0.93809	0.63183	0	1.1269	0	0.375633	1.68204	0.750211	0.629278	0.201157
Alpha-1-antitrypsin OS=Homo sapiens GN=SERPINA1 PE=1 SV=3	A1AT_HUMAN	523 kDa	8.6166	7.59	5.6286	7.2784	2.0593	5.6347	5.1986	4.29753	1.69362	0.760113	0.104974	0.978916
Reticulon-4 OS=Homo sapiens GN=RTN4 PE=1 SV=2	RTN4_HUMAN	718 kDa	15.318	12.334	12.195	13.2823	8.2372	9.0155	6.2383	7.83033	1.69627	0.762363	0.0142022	1.84765
DnaJ homolog subfamily C member 8 OS=Homo sapiens GN=DNAJC8 PE=1 SV=2	DNJC8_HUMAN	396 kDa	4.787	3.795	7.5047	5.36223	5.1482	2.2539	2.0794	3.1605	1.69664	0.762681	0.213538	0.670526
Putative RNA-binding protein 3 OS=Homo sapiens GN=RBM3 PE=1 SV=1	RBM3_HUMAN	400 kDa	5.7444	5.6925	4.6905	5.3758	4.1186	2.2539	3.1191	3.16387	1.69912	0.764791	0.0257386	1.58941
Ubiquitin-conjugating enzyme E2 K OS=Homo sapiens GN=UBE2K PE=1 SV=3	UBE2K_HUMAN	22 kDa	1.9148	0	0	0.638267	0	1.1269	0	0.375633	1.69917	0.764834	0.740778	0.130312
Spermidine synthase OS=Homo sapiens GN=SRM PE=1 SV=1	SPEE_HUMAN	357 kDa	5.7444	1.8975	6.5666	4.73617	5.1482	1.1269	2.0794	2.78483	1.7007	0.766129	0.358429	0.445597
Short/branched chain specific acyl-CoA dehydrogenase, mitochondrial OS=Homo sapiens GN=ACADSB PE=1 SV=1	ACDSB_HUMAN	897 kDa	27.765	12.334	31.895	23.998	14.415	10.142	17.675	14.0773	1.70473	0.76954	0.192666	0.715195
Splicing factor 3B subunit 2 OS=Homo sapiens GN=SF3B2 PE=1 SV=2	SF3B2_HUMAN	511 kDa	7.6592	7.59	6.5666	7.27193	4.1186	4.5078	4.1588	4.26173	1.70633	0.770899	0.00129667	2.88717
Cathepsin D OS=Homo sapiens GN=CTSD PE=1 SV=1	CATD_HUMAN	979 kDa	41.168	31.309	30.019	34.1653	20.593	20.285	18.715	19.8643	1.71993	0.782353	0.0160331	1.79498
Prefoldin subunit 2 OS=Homo sapiens GN=PFDN2 PE=1 SV=1	PFD2_HUMAN	143 kDa	1.9148	1.8975	1.8762	1.89617	0	2.2539	1.0397	1.09787	1.72714	0.788383	0.287598	0.541215
Ras-related C3 botulinum toxin substrate 1 OS=Homo sapiens GN=RAC1 PE=1 SV=1	RAC1_HUMAN	667 kDa	15.318	10.436	9.3809	11.7116	8.2372	7.8886	4.1588	6.76153	1.7321	0.79252	0.0923208	1.0347
40S ribosomal protein S6 OS=Homo sapiens GN=RPS6 PE=1 SV=1	RS6_HUMAN	699 kDa	13.404	16.129	9.3809	12.9713	7.2075	9.0155	6.2383	7.4871	1.73249	0.792844	0.0610576	1.21426
Putative RNA-binding protein Luc7-like 2 OS=Homo sapiens GN=LUC7L2 PE=1 SV=2	LC7L2_HUMAN	391 kDa	5.7444	4.7437	5.6286	5.37223	6.1779	0	3.1191	3.099	1.73354	0.793719	0.277772	0.556311
Proliferating cell nuclear antigen OS=Homo sapiens GN=PCNA PE=1 SV=1	PCNA_HUMAN	820 kDa	13.404	22.77	18.762	18.312	14.415	7.8886	9.3574	10.5537	1.73513	0.795045	0.081921	1.0866
Retinal dehydrogenase 1 OS=Homo sapiens GN=ALDH1A1 PE=1 SV=2	AL1A1_HUMAN	1198 kDa	216.37	233.39	227.02	225.593	121.5	143.12	124.77	129.797	1.73805	0.797471	0.00033127	3.47982
RNA-binding protein 14 OS=Homo sapiens GN=RBM14 PE=1 SV=2	RBM14_HUMAN	241 kDa	2.8722	1.8975	4.6905	3.1534	2.0593	3.3808	0	1.81337	1.73898	0.798238	0.354109	0.450863
40S ribosomal protein S12 OS=Homo sapiens GN=RPS12 PE=1 SV=3	RS12_HUMAN	944 kDa	29.679	31.309	29.081	30.023	20.593	12.396	18.715	17.2347	1.74201	0.800755	0.00758924	2.1198
Translational activator of cytochrome c oxidase 1 OS=Homo sapiens GN=TACO1 PE=1 SV=1	TACO1_HUMAN	32 kDa	0	1.8975	1.8762	1.2579	1.0296	1.1269	0	0.718833	1.74992	0.807288	0.49844	0.302387
Apoptosis-inducing factor 2 OS=Homo sapiens GN=AIFM2 PE=1 SV=1	AIFM2_HUMAN	189 kDa	2.8722	1.8975	2.8143	2.528	0	2.2539	2.0794	1.44443	1.75017	0.807493	0.241996	0.616191
Thymidylate kinase OS=Homo sapiens GN=DTYMK PE=1 SV=4	KTHY_HUMAN	188 kDa	3.8296	1.8975	1.8762	2.53443	1.0296	2.2539	1.0397	1.44107	1.75872	0.814526	0.225938	0.646011
Visinin-like protein 1 OS=Homo sapiens GN=VSNL1 PE=1 SV=2	VISL1_HUMAN	235 kDa	2.8722	5.6925	0.93809	3.1676	1.0296	2.2539	2.0794	1.78763	1.77195	0.825338	0.3899	0.409047
Eukaryotic translation initiation factor 3 subunit K OS=Homo sapiens GN=EIF3K PE=1 SV=1	EIF3K_HUMAN	228 kDa	3.8296	2.8462	2.8143	3.16337	2.0593	2.2539	1.0397	1.7843	1.77289	0.826103	0.0517595	1.28601
UPF0364 protein C6orf211 OS=Homo sapiens GN=C6orf211 PE=1 SV=1	CF211_HUMAN	419 kDa	2.8722	6.6412	7.5047	5.6727	2.0593	3.3808	4.1588	3.19963	1.77292	0.826129	0.185525	0.731597
Actin-like protein 6A OS=Homo sapiens GN=ACTL6A PE=1 SV=1	ACL6A_HUMAN	136 kDa	1.9148	1.8975	1.8762	1.89617	0	1.1269	2.0794	1.06877	1.77416	0.827139	0.240687	0.618547
Nuclear transport factor 2 OS=Homo sapiens GN=NUTF2 PE=1 SV=1	NTF2_HUMAN	281 kDa	2.8722	3.795	4.6905	3.7859	2.0593	2.2539	2.0794	2.13087	1.77669	0.829196	0.0351405	1.45419
26S protease regulatory subunit 4 OS=Homo sapiens GN=PSMC1 PE=1 SV=1	PRS4_HUMAN	611 kDa	11.489	9.4875	9.3809	10.1191	8.2372	6.7616	2.0794	5.69273	1.77755	0.829892	0.088924	1.05098
Cluster of Polyadenylate-binding protein 4 OS=Homo sapiens GN=PABPC4 PE=1 SV=1 (PABP4_HUMAN)	PABP4_HUMAN [3]	957 kDa	32.552	32.257	34.709	33.1727	17.504	13.523	24.953	18.66	1.77774	0.830046	0.0134615	1.87091
V-type proton ATPase subunit E 1 OS=Homo sapiens GN=ATP6V1E1 PE=1 SV=1	VATE1_HUMAN	339 kDa	3.8296	5.6925	3.7524	4.42483	2.0593	2.2539	3.1191	2.47743	1.78606	0.836777	0.0523685	1.28093
Intercellular adhesion molecule 1 OS=Homo sapiens GN=ICAM1 PE=1 SV=2	ICAM1_HUMAN	373 kDa	5.7444	4.7437	4.6905	5.05953	3.0889	2.2539	3.1191	2.82063	1.79376	0.842985	0.0073169	2.13567
Ubiquitin carboxyl-terminal hydrolase 7 OS=Homo sapiens GN=USP7 PE=1 SV=2	UBP7_HUMAN	128 kDa	4.787	0	0.93809	1.90836	2.0593	1.1269	0	1.06207	1.79684	0.845462	0.620813	0.207039
DNA replication licensing factor MCM7 OS=Homo sapiens GN=MCM7 PE=1 SV=4	MCM7_HUMAN	628 kDa	13.404	9.4875	11.257	11.3828	7.2075	4.5078	7.278	6.3311	1.79792	0.846332	0.0254747	1.59389
HEAT repeat-containing protein 1 OS=Homo sapiens GN=HEATR1 PE=1 SV=3	HEAT1_HUMAN	242 kDa	0	0	1.8762	0.6254	0	0	1.0397	0.346567	1.80456	0.851646	0.716431	0.144826
Protein TBRG4 OS=Homo sapiens GN=TBRG4 PE=1 SV=1	TBRG4_HUMAN	498 kDa	5.7444	8.5387	8.4428	7.5753	6.1779	2.2539	4.1588	4.19687	1.80499	0.85199	0.0812216	1.09033
ATP-binding cassette sub-family E member 1 OS=Homo sapiens GN=ABCE1 PE=1 SV=1	ABCE1_HUMAN	304 kDa	3.8296	4.7437	4.6905	4.42127	4.1186	1.1269	2.0794	2.44163	1.81078	0.856613	0.100572	0.997525
Nuclear pore complex protein Nup155 OS=Homo sapiens GN=NUP155 PE=1 SV=1	NU155_HUMAN	155 kDa	0	0	3.7524	1.2508	1.0296	0	1.0397	0.689767	1.81337	0.858671	0.68774	0.162576
Ribosome biogenesis regulatory protein homolog OS=Homo sapiens GN=RRS1 PE=1 SV=2	RRS1_HUMAN	41 kDa	0	0.94875	0.93809	0.628947	0	0	1.0397	0.346567	1.81479	0.859805	0.578792	0.237478
Far upstream element-binding protein 1 OS=Homo sapiens GN=FUBP1 PE=1 SV=3	FUBP1_HUMAN	645 kDa	13.404	11.385	10.319	11.7027	8.2372	9.0155	2.0794	6.44403	1.81605	0.860801	0.0910172	1.04088
Nuclear pore complex protein Nup160 OS=Homo sapiens GN=NUP160 PE=1 SV=3	NU160_HUMAN	162 kDa	1.9148	0	1.8762	1.26367	0	0	2.0794	0.693133	1.82312	0.866411	0.575855	0.239687
Carboxymethylenebutenolidase homolog OS=Homo sapiens GN=CMBL PE=1 SV=1	CMBL_HUMAN	28 kDa	0	2.8462	0.93809	1.26143	1.0296	0	1.0397	0.689767	1.82878	0.87088	0.56216	0.25014
Ras-related protein Rab-21 OS=Homo sapiens GN=RAB21 PE=1 SV=3	RAB21_HUMAN	252 kDa	3.8296	3.795	3.7524	3.79233	2.0593	0	4.1588	2.0727	1.82966	0.871574	0.22538	0.647085
Ribosome biogenesis protein BMS1 homolog OS=Homo sapiens GN=BMS1 PE=1 SV=1	BMS1_HUMAN	146 kDa	0.9574	0	2.8143	1.25723	2.0593	0	0	0.686433	1.83154	0.873061	0.623267	0.205326
Aminopeptidase B OS=Homo sapiens GN=RNPEP PE=1 SV=2	AMPB_HUMAN	73 kDa	0	1.8975	1.8762	1.2579	2.0593	0	0	0.686433	1.83252	0.873826	0.572534	0.242198
Cluster of CTP synthase 1 OS=Homo sapiens GN=CTPS1 PE=1 SV=2 (PYRG1_HUMAN)	PYRG1_HUMAN	197 kDa	1.9148	4.7437	2.8143	3.1576	3.0889	0	2.0794	1.72277	1.83287	0.874101	0.309641	0.509141
Fructose-bisphosphate aldolase C OS=Homo sapiens GN=ALDOC PE=1 SV=2	ALDOC_HUMAN	817 kDa	18.191	21.821	16.886	18.966	9.2668	12.396	9.3574	10.3401	1.83422	0.87517	0.00868391	2.06128
Cluster of Serine/threonine-protein kinase PAK 2 OS=Homo sapiens GN=PAK2 PE=1 SV=3 (PAK2_HUMAN)	PAK2_HUMAN	297 kDa	4.787	5.6925	2.8143	4.43127	5.1482	0	2.0794	2.4092	1.83931	0.879165	0.304903	0.515839
Programmed cell death 6-interacting protein OS=Homo sapiens GN=PDCD6IP PE=1 SV=1	PDC6I_HUMAN	96 kDa	1.9148	0	1.8762	1.26367	2.0593	0	0	0.686433	1.84092	0.880424	0.569625	0.244411
Choline-phosphate cytidylyltransferase A OS=Homo sapiens GN=PCYT1A PE=1 SV=2	PCY1A_HUMAN	149 kDa	3.8296	1.8975	1.8762	2.53443	3.0889	0	1.0397	1.3762	1.84162	0.880973	0.357505	0.446718
Alanine aminotransferase 2 OS=Homo sapiens GN=GPT2 PE=1 SV=1	ALAT2_HUMAN	58 kDa	1.9148	1.8975	0	1.27077	1.0296	0	1.0397	0.689767	1.84231	0.881519	0.466654	0.331005
Glucose-6-phosphate isomerase OS=Homo sapiens GN=GPI PE=1 SV=4	G6PI_HUMAN	1102 kDa	68.933	82.541	67.543	73.0057	35.008	34.935	48.866	39.603	1.84344	0.882399	0.00740553	2.13044
Eukaryotic translation initiation factor 3 subunit E OS=Homo sapiens GN=EIF3E PE=1 SV=1	EIF3E_HUMAN	52 kDa	1.9148	0.94875	0.93809	1.26721	2.0593	0	0	0.686433	1.84608	0.884468	0.486797	0.312652
Calponin-2 OS=Homo sapiens GN=CNN2 PE=1 SV=4	CNN2_HUMAN	540 kDa	9.574	8.5387	7.5047	8.53913	4.1186	4.5078	5.1986	4.60833	1.85298	0.889845	0.00434683	2.36183
Proteasome activator complex subunit 2 OS=Homo sapiens GN=PSME2 PE=1 SV=4	PSME2_HUMAN	427 kDa	7.6592	2.8462	7.5047	6.00337	1.0296	4.5078	4.1588	3.23207	1.85744	0.893315	0.223955	0.649839
Elongation factor 1-delta OS=Homo sapiens GN=EEF1D PE=1 SV=5	EF1D_HUMAN	529 kDa	5.7444	10.436	9.3809	8.52043	4.1186	3.3808	6.2383	4.57923	1.86067	0.895821	0.0763703	1.11708
U6 snRNA-associated Sm-like protein LSm2 OS=Homo sapiens GN=LSM2 PE=1 SV=1	LSM2_HUMAN	423 kDa	5.7444	6.6412	5.6286	6.00473	3.0889	4.5078	2.0794	3.22537	1.86172	0.896637	0.0229062	1.64005
Phosphoglycerate mutase 1 OS=Homo sapiens GN=PGAM1 PE=1 SV=2	PGAM1_HUMAN	1126 kDa	86.166	86.336	85.366	85.956	44.275	43.951	49.906	46.044	1.86682	0.900585	3.40814e-05	4.46748
UTP--glucose-1-phosphate uridylyltransferase OS=Homo sapiens GN=UGP2 PE=1 SV=5	UGPA_HUMAN	776 kDa	17.233	20.872	14.071	17.392	10.296	11.269	6.2383	9.26777	1.87661	0.90813	0.0312622	1.50498
Acyl-CoA-binding protein OS=Homo sapiens GN=DBI PE=1 SV=2	ACBP_HUMAN	853 kDa	19.148	25.616	22.514	22.426	13.385	13.523	8.3177	11.7419	1.90991	0.933506	0.0135173	1.86911
Signal recognition particle 9 kDa protein OS=Homo sapiens GN=SRP9 PE=1 SV=2	SRP09_HUMAN	340 kDa	5.7444	5.6925	2.8143	4.7504	2.0593	2.2539	3.1191	2.47743	1.91747	0.939203	0.0900945	1.0453
Cluster of KH domain-containing, RNA-binding, signal transduction-associated protein 1 OS=Homo sapiens GN=KHDRBS1 PE=1 SV=1 (KHDR1_HUMAN)	KHDR1_HUMAN	693 kDa	16.276	11.385	15.009	14.2233	10.296	5.6347	6.2383	7.38967	1.92476	0.944678	0.0299509	1.52359
Heat shock protein beta-1 OS=Homo sapiens GN=HSPB1 PE=1 SV=2	HSPB1_HUMAN	512 kDa	8.6166	6.6412	9.3809	8.2129	4.1186	4.5078	4.1588	4.26173	1.92713	0.946451	0.00873595	2.05869
Inter-alpha-trypsin inhibitor heavy chain H2 OS=Homo sapiens GN=ITIH2 PE=1 SV=2	ITIH2_HUMAN	282 kDa	3.8296	4.7437	3.7524	4.10857	2.0593	2.2539	2.0794	2.13087	1.92812	0.947195	0.00365714	2.43686
Cysteine and glycine-rich protein 1 OS=Homo sapiens GN=CSRP1 PE=1 SV=3	CSRP1_HUMAN	190 kDa	0.9574	3.795	3.7524	2.83493	1.0296	3.3808	0	1.47013	1.92835	0.947368	0.376166	0.424621
60S ribosomal protein L8 OS=Homo sapiens GN=RPL8 PE=1 SV=2	RL8_HUMAN	991 kDa	38.296	41.745	43.152	41.0643	21.623	19.158	22.874	21.2183	1.93532	0.952575	0.000392238	3.40645
Inosine triphosphate pyrophosphatase OS=Homo sapiens GN=ITPA PE=1 SV=2	ITPA_HUMAN	263 kDa	2.8722	3.795	5.6286	4.0986	1.0296	1.1269	4.1588	2.1051	1.94699	0.961242	0.202223	0.694169
NADPH--cytochrome P450 reductase OS=Homo sapiens GN=POR PE=1 SV=2	NCPR_HUMAN	778 kDa	19.148	16.129	19.7	18.3257	17.504	2.2539	8.3177	9.35853	1.95818	0.969511	0.12124	0.916355
40S ribosomal protein S20 OS=Homo sapiens GN=RPS20 PE=1 SV=1	RS20_HUMAN	848 kDa	22.978	24.667	21.576	23.0737	13.385	12.396	9.3574	11.7128	1.96995	0.978161	0.00165264	2.78182
AP-2 complex subunit alpha-2 OS=Homo sapiens GN=AP2A2 PE=1 SV=2	AP2A2_HUMAN	179 kDa	1.9148	2.8462	3.7524	2.8378	2.0593	2.2539	0	1.43773	1.9738	0.980977	0.19286	0.714759
Granulins OS=Homo sapiens GN=GRN PE=1 SV=2	GRN_HUMAN	205 kDa	1.9148	4.7437	3.7524	3.4703	3.0889	1.1269	1.0397	1.75183	1.98095	0.986195	0.181936	0.740082
Serine/threonine-protein phosphatase 2A catalytic subunit alpha isoform OS=Homo sapiens GN=PPP2CA PE=1 SV=1	PP2AA_HUMAN	253 kDa	4.787	4.7437	2.8143	4.115	2.0593	0	4.1588	2.0727	1.98533	0.989381	0.209061	0.679728
Glutamine--tRNA ligase OS=Homo sapiens GN=QARS PE=1 SV=1	SYQ_HUMAN	710 kDa	12.446	16.129	17.824	15.4663	9.2668	6.7616	7.278	7.7688	1.99083	0.993368	0.0119717	1.92185
40S ribosomal protein S15 OS=Homo sapiens GN=RPS15 PE=1 SV=2	RS15_HUMAN	732 kDa	15.318	18.026	15.948	16.4307	8.2372	10.142	6.2383	8.20583	2.00232	1.00167	0.00411394	2.38574
Thyroid hormone receptor-associated protein 3 OS=Homo sapiens GN=THRAP3 PE=1 SV=2	TR150_HUMAN	513 kDa	10.531	8.5387	6.5666	8.54543	4.1186	4.5078	4.1588	4.26173	2.00515	1.00371	0.0204485	1.68934
Sorbitol dehydrogenase OS=Homo sapiens GN=SORD PE=1 SV=4	DHSO_HUMAN	502 kDa	8.6166	7.59	9.3809	8.52917	5.1482	3.3808	4.1588	4.22927	2.0167	1.012	0.0041231	2.38478
Calumenin OS=Homo sapiens GN=CALU PE=1 SV=2	CALU_HUMAN	833 kDa	22.978	22.77	22.514	22.754	14.415	5.6347	13.516	11.1886	2.03368	1.02409	0.0143536	1.84304
Cocaine esterase OS=Homo sapiens GN=CES2 PE=1 SV=1	EST2_HUMAN	477 kDa	5.7444	9.4875	8.4428	7.89157	6.1779	3.3808	2.0794	3.87937	2.03424	1.02449	0.0712643	1.14713
NADH-cytochrome b5 reductase 3 OS=Homo sapiens GN=CYB5R3 PE=1 SV=3	NB5R3_HUMAN	1061 kDa	63.189	48.386	72.233	61.2693	33.978	29.3	27.033	30.1037	2.03528	1.02523	0.0126297	1.89861
Pyruvate kinase isozymes M1/M2 OS=Homo sapiens GN=PKM PE=1 SV=4	KPYM_HUMAN	1189 kDa	176.16	223.9	203.57	201.21	114.29	83.393	98.773	98.8187	2.03615	1.02585	0.00339852	2.46871
DNA replication licensing factor MCM5 OS=Homo sapiens GN=MCM5 PE=1 SV=5	MCM5_HUMAN	542 kDa	10.531	9.4875	8.4428	9.4871	5.1482	5.6347	3.1191	4.634	2.04728	1.03371	0.00769866	2.11358
Nucleobindin-1 OS=Homo sapiens GN=NUCB1 PE=1 SV=4	NUCB1_HUMAN	451 kDa	4.787	10.436	6.5666	7.2632	3.0889	3.3808	4.1588	3.54283	2.05011	1.0357	0.093558	1.02892
Interferon-inducible double stranded RNA-dependent protein kinase activator A OS=Homo sapiens GN=PRKRA PE=1 SV=1	PRKRA_HUMAN	161 kDa	3.8296	0	4.6905	2.84003	2.0593	0	2.0794	1.37957	2.05864	1.04169	0.412495	0.384582
Liver carboxylesterase 1 OS=Homo sapiens GN=CES1 PE=1 SV=2	EST1_HUMAN	606 kDa	10.531	11.385	13.133	11.683	6.1779	5.6347	5.1986	5.6704	2.06035	1.04289	0.00181173	2.74191
Retrotransposon-derived protein PEG10 OS=Homo sapiens GN=PEG10 PE=1 SV=2	PEG10_HUMAN	506 kDa	10.531	6.6412	9.3809	8.85103	5.1482	4.5078	3.1191	4.25837	2.0785	1.05555	0.0241629	1.61685
Fructose-bisphosphate aldolase A OS=Homo sapiens GN=ALDOA PE=1 SV=2	ALDOA_HUMAN	1166 kDa	154.14	161.29	158.54	157.99	87.52	67.616	72.78	75.972	2.07958	1.05629	0.000202964	3.69258
Multifunctional protein ADE2 OS=Homo sapiens GN=PAICS PE=1 SV=3	PUR6_HUMAN	827 kDa	24.892	21.821	21.576	22.763	8.2372	7.8886	16.635	10.9203	2.08447	1.05968	0.0178306	1.74884
Coiled-coil-helix-coiled-coil-helix domain-containing protein 3, mitochondrial OS=Homo sapiens GN=CHCHD3 PE=1 SV=1	CHCH3_HUMAN	129 kDa	2.8722	1.8975	1.8762	2.2153	2.0593	1.1269	0	1.06207	2.08584	1.06063	0.165127	0.782183
NADH dehydrogenase [ubiquinone] iron-sulfur protein 2, mitochondrial OS=Homo sapiens GN=NDUFS2 PE=1 SV=2	NDUS2_HUMAN	298 kDa	4.787	6.6412	3.7524	5.0602	3.0889	0	4.1588	2.4159	2.09454	1.06663	0.154003	0.812471
Flap endonuclease 1 OS=Homo sapiens GN=FEN1 PE=1 SV=1	FEN1_HUMAN	401 kDa	7.6592	5.6925	6.5666	6.63943	4.1186	2.2539	3.1191	3.16387	2.09852	1.06937	0.0113708	1.94421
Coatomer subunit beta' OS=Homo sapiens GN=COPB2 PE=1 SV=2	COPB2_HUMAN	385 kDa	3.8296	7.59	6.5666	5.9954	2.0593	3.3808	3.1191	2.85307	2.10139	1.07134	0.0579403	1.23702
Eukaryotic translation initiation factor 3 subunit D OS=Homo sapiens GN=EIF3D PE=1 SV=1	EIF3D_HUMAN	64 kDa	2.8722	0	1.8762	1.5828	0	2.2539	0	0.7513	2.10675	1.07502	0.5021	0.29921
Cluster of Transgelin-2 OS=Homo sapiens GN=TAGLN2 PE=1 SV=3 (TAGL2_HUMAN)	TAGL2_HUMAN	258 kDa	4.787	4.7437	3.7524	4.4277	3.0889	1.1269	2.0794	2.0984	2.11004	1.07727	0.0241976	1.61623
PDZ and LIM domain protein 1 OS=Homo sapiens GN=PDLIM1 PE=1 SV=4	PDLI1_HUMAN	934 kDa	33.509	35.104	35.648	34.7537	19.563	16.904	12.477	16.3147	2.13021	1.091	0.00104088	2.9826
Phosphoribosylformylglycinamidine synthase OS=Homo sapiens GN=PFAS PE=1 SV=4	PUR4_HUMAN	145 kDa	1.9148	1.8975	2.8143	2.20887	3.0889	0	0	1.02963	2.14529	1.10118	0.333557	0.476829
Hydroxysteroid dehydrogenase-like protein 2 OS=Homo sapiens GN=HSDL2 PE=1 SV=1	HSDL2_HUMAN	216 kDa	4.787	0.94875	5.6286	3.78812	2.0593	1.1269	2.0794	1.7552	2.15823	1.10985	0.239984	0.619818
Dipeptidyl peptidase 1 OS=Homo sapiens GN=CTSC PE=1 SV=2	CATC_HUMAN	431 kDa	7.6592	7.59	7.5047	7.58463	5.1482	2.2539	3.1191	3.50707	2.16267	1.11281	0.00898784	2.04634
Suppressor of G2 allele of SKP1 homolog OS=Homo sapiens GN=SUGT1 PE=1 SV=3	SUGT1_HUMAN	41 kDa	0.9574	1.8975	1.8762	1.57703	1.0296	1.1269	0	0.718833	2.19388	1.13348	0.145346	0.837598
Complexin-2 OS=Homo sapiens GN=CPLX2 PE=1 SV=2	CPLX2_HUMAN	180 kDa	3.8296	1.8975	3.7524	3.15983	2.0593	2.2539	0	1.43773	2.19779	1.13605	0.146819	0.833216
Crk-like protein OS=Homo sapiens GN=CRKL PE=1 SV=1	CRKL_HUMAN	181 kDa	3.8296	2.8462	2.8143	3.16337	2.0593	2.2539	0	1.43773	2.20025	1.13766	0.095552	1.01976
Cluster of Transforming protein RhoA OS=Homo sapiens GN=RHOA PE=1 SV=1 (RHOA_HUMAN)	RHOA_HUMAN [2]	623 kDa	12.446	11.385	15.948	13.2597	5.1482	5.6347	7.278	6.0203	2.20249	1.13914	0.00892343	2.04947
Calcyclin-binding protein OS=Homo sapiens GN=CACYBP PE=1 SV=2	CYBP_HUMAN	571 kDa	7.6592	13.282	12.195	11.0454	4.1186	6.7616	4.1588	5.013	2.20335	1.1397	0.0354022	1.45097
Thioredoxin domain-containing protein 12 OS=Homo sapiens GN=TXNDC12 PE=1 SV=1	TXD12_HUMAN	169 kDa	0.9574	3.795	4.6905	3.14763	2.0593	1.1269	1.0397	1.40863	2.23453	1.15997	0.211888	0.673895
Lysine--tRNA ligase OS=Homo sapiens GN=KARS PE=1 SV=3	SYK_HUMAN	353 kDa	7.6592	4.7437	4.6905	5.6978	3.0889	4.5078	0	2.53223	2.25011	1.16999	0.128022	0.892716
Long-chain-fatty-acid--CoA ligase 4 OS=Homo sapiens GN=ACSL4 PE=1 SV=2	ACSL4_HUMAN	527 kDa	12.446	8.5387	10.319	10.4346	5.1482	3.3808	5.1986	4.57587	2.28035	1.18925	0.0101459	1.99371
Pyridoxal kinase OS=Homo sapiens GN=PDXK PE=1 SV=1	PDXK_HUMAN	356 kDa	6.7018	4.7437	7.5047	6.31673	3.0889	0	5.1986	2.7625	2.2866	1.1932	0.107355	0.969179
Nicotinate-nucleotide pyrophosphorylase [carboxylating] OS=Homo sapiens GN=QPRT PE=1 SV=3	NADC_HUMAN	31 kDa	2.8722	1.8975	0	1.5899	0	0	2.0794	0.693133	2.29379	1.19773	0.457489	0.33962
Translational activator GCN1 OS=Homo sapiens GN=GCN1L1 PE=1 SV=6	GCN1L_HUMAN	711 kDa	18.191	13.282	22.514	17.9957	9.2668	6.7616	7.278	7.7688	2.3164	1.21189	0.0210807	1.67612
Programmed cell death protein 5 OS=Homo sapiens GN=PDCD5 PE=1 SV=3	PDCD5_HUMAN	446 kDa	7.6592	7.59	9.3809	8.21003	4.1186	3.3808	3.1191	3.5395	2.31955	1.21384	0.00207808	2.68234
Cluster of L-lactate dehydrogenase A chain OS=Homo sapiens GN=LDHA PE=1 SV=2 (LDHA_HUMAN)	LDHA_HUMAN	1187 kDa	223.07	171.72	283.3	226.03	115.32	87.901	88.376	97.199	2.32544	1.2175	0.018358	1.73617
DNA replication licensing factor MCM3 OS=Homo sapiens GN=MCM3 PE=1 SV=3	MCM3_HUMAN	432 kDa	8.6166	7.59	8.4428	8.21647	5.1482	2.2539	3.1191	3.50707	2.34283	1.22825	0.00674633	2.17093
DNA damage-binding protein 1 OS=Homo sapiens GN=DDB1 PE=1 SV=1	DDB1_HUMAN	363 kDa	6.7018	6.6412	6.5666	6.63653	4.1186	2.2539	2.0794	2.8173	2.35564	1.23612	0.00428085	2.36847
DnaJ homolog subfamily A member 1 OS=Homo sapiens GN=DNAJA1 PE=1 SV=2	DNJA1_HUMAN	483 kDa	8.6166	10.436	8.4428	9.16513	4.1186	3.3808	4.1588	3.88607	2.35846	1.23785	0.00153194	2.81476
Fumarylacetoacetase OS=Homo sapiens GN=FAH PE=1 SV=2	FAAA_HUMAN	130 kDa	0.9574	1.8975	4.6905	2.51513	2.0593	1.1269	0	1.06207	2.36815	1.24376	0.316148	0.500109
Small nuclear ribonucleoprotein Sm D2 OS=Homo sapiens GN=SNRPD2 PE=1 SV=1	SMD2_HUMAN	615 kDa	15.318	12.334	13.133	13.595	5.1482	6.7616	5.1986	5.7028	2.38392	1.25333	0.00160119	2.79556
SPATS2-like protein OS=Homo sapiens GN=SPATS2L PE=1 SV=2	SPS2L_HUMAN	352 kDa	2.8722	6.6412	8.4428	5.9854	2.0593	3.3808	2.0794	2.5065	2.38795	1.25577	0.1099	0.959003
Plasminogen activator inhibitor 1 RNA-binding protein OS=Homo sapiens GN=SERBP1 PE=1 SV=2	PAIRB_HUMAN	752 kDa	17.233	19.924	26.267	21.1413	8.2372	5.6347	12.477	8.78297	2.40708	1.26729	0.0208088	1.68175
Histone-binding protein RBBP7 OS=Homo sapiens GN=RBBP7 PE=1 SV=1	RBBP7_HUMAN	447 kDa	11.489	6.6412	7.5047	8.54497	4.1186	3.3808	3.1191	3.5395	2.41417	1.27153	0.0302922	1.51867
Pyridoxal-dependent decarboxylase domain-containing protein 1 OS=Homo sapiens GN=PDXDC1 PE=1 SV=2	PDXD1_HUMAN	182 kDa	2.8722	4.7437	2.8143	3.47673	2.0593	2.2539	0	1.43773	2.4182	1.27394	0.100879	0.996199
Cysteine and histidine-rich domain-containing protein 1 OS=Homo sapiens GN=CHORDC1 PE=1 SV=2	CHRD1_HUMAN	183 kDa	4.787	2.8462	2.8143	3.4825	2.0593	2.2539	0	1.43773	2.42222	1.27633	0.10331	0.985858
40S ribosomal protein S17-like OS=Homo sapiens GN=RPS17L PE=3 SV=1	RS17L_HUMAN (+1)	741 kDa	22.02	18.975	20.638	20.5443	8.2372	6.7616	10.397	8.46527	2.4269	1.27911	0.000924675	3.03401
UPF0160 protein MYG1, mitochondrial OS=Homo sapiens GN=C12orf10 PE=1 SV=2	MYG1_HUMAN	42 kDa	1.9148	2.8462	2.8143	2.5251	1.0296	0	2.0794	1.03633	2.43657	1.28485	0.0915599	1.03829
Bystin OS=Homo sapiens GN=BYSL PE=1 SV=3	BYST_HUMAN	50 kDa	1.9148	2.8462	2.8143	2.5251	3.0889	0	0	1.02963	2.45243	1.29421	0.236184	0.62675
Dual specificity mitogen-activated protein kinase kinase 2 OS=Homo sapiens GN=MAP2K2 PE=1 SV=1	MP2K2_HUMAN	170 kDa	3.8296	2.8462	3.7524	3.47607	2.0593	1.1269	1.0397	1.40863	2.46769	1.30316	0.0103909	1.98335
Mannosyl-oligosaccharide 1,2-alpha-mannosidase IA OS=Homo sapiens GN=MAN1A1 PE=1 SV=3	MA1A1_HUMAN	229 kDa	4.787	1.8975	6.5666	4.41703	2.0593	2.2539	1.0397	1.7843	2.4755	1.30772	0.135608	0.867715
GTP-binding protein SAR1b OS=Homo sapiens GN=SAR1B PE=1 SV=1	SAR1B_HUMAN	358 kDa	8.6166	6.6412	5.6286	6.96213	3.0889	1.1269	4.1588	2.79153	2.49402	1.31847	0.0287983	1.54063
Glutathione synthetase OS=Homo sapiens GN=GSS PE=1 SV=1	GSHB_HUMAN	52 kDa	0	0.94875	1.8762	0.94165	0	1.1269	0	0.375633	2.50683	1.32587	0.438904	0.35763
Ras GTPase-activating protein-binding protein 2 OS=Homo sapiens GN=G3BP2 PE=1 SV=2	G3BP2_HUMAN	167 kDa	3.8296	2.8462	3.7524	3.47607	0	0	4.1588	1.38627	2.5075	1.32625	0.215542	0.666469
COP9 signalosome complex subunit 6 OS=Homo sapiens GN=COPS6 PE=1 SV=1	CSN6_HUMAN	36 kDa	0	1.8975	0.93809	0.945197	0	1.1269	0	0.375633	2.51627	1.33129	0.439496	0.357045
Ectonucleoside triphosphate diphosphohydrolase 5 OS=Homo sapiens GN=ENTPD5 PE=1 SV=1	ENTP5_HUMAN	48 kDa	0.9574	2.8462	1.8762	1.89327	0	2.2539	0	0.7513	2.51999	1.33342	0.286054	0.543552
Pre-mRNA-processing factor 40 homolog A OS=Homo sapiens GN=PRPF40A PE=1 SV=2	PR40A_HUMAN	217 kDa	4.787	4.7437	3.7524	4.4277	2.0593	1.1269	2.0794	1.7552	2.52262	1.33492	0.0044163	2.35494
GMP synthase [glutamine-hydrolyzing] OS=Homo sapiens GN=GMPS PE=1 SV=1	GUAA_HUMAN	283 kDa	5.7444	5.6925	4.6905	5.3758	2.0593	2.2539	2.0794	2.13087	2.52282	1.33504	0.000740381	3.13054
Ferritin heavy chain OS=Homo sapiens GN=FTH1 PE=1 SV=2	FRIH_HUMAN	162 kDa	4.787	3.795	1.8762	3.48607	2.0593	0	2.0794	1.37957	2.52693	1.33738	0.127511	0.894452
45 kDa calcium-binding protein OS=Homo sapiens GN=SDF4 PE=1 SV=1	CAB45_HUMAN	265 kDa	5.7444	4.7437	5.6286	5.37223	4.1186	2.2539	0	2.12417	2.5291	1.33862	0.057788	1.23816
Transferrin receptor protein 1 OS=Homo sapiens GN=TFRC PE=1 SV=2	TFR1_HUMAN	382 kDa	7.6592	4.7437	9.3809	7.26127	3.0889	3.3808	2.0794	2.8497	2.54808	1.34941	0.0351975	1.45349
Eukaryotic translation initiation factor 3 subunit M OS=Homo sapiens GN=EIF3M PE=1 SV=1	EIF3M_HUMAN	553 kDa	12.446	7.59	17.824	12.62	4.1186	3.3808	7.278	4.9258	2.56202	1.35728	0.0732841	1.13499
Apoptosis inhibitor 5 OS=Homo sapiens GN=API5 PE=1 SV=3	API5_HUMAN	141 kDa	3.8296	0.94875	3.7524	2.84358	1.0296	2.2539	0	1.0945	2.59807	1.37744	0.202916	0.692684
Very long-chain specific acyl-CoA dehydrogenase, mitochondrial OS=Homo sapiens GN=ACADVL PE=1 SV=1	ACADV_HUMAN	765 kDa	26.807	18.975	26.267	24.0163	12.356	7.8886	7.278	9.1742	2.61781	1.38836	0.00768461	2.11438
Heterogeneous nuclear ribonucleoprotein U-like protein 2 OS=Homo sapiens GN=HNRNPUL2 PE=1 SV=1	HNRL2_HUMAN	85 kDa	1.9148	0.94875	2.8143	1.89262	0	1.1269	1.0397	0.7222	2.62063	1.38991	0.145648	0.836695
Mannose-1-phosphate guanyltransferase alpha OS=Homo sapiens GN=GMPPA PE=1 SV=1	GMPPA_HUMAN	46 kDa	0.9574	2.8462	1.8762	1.89327	1.0296	1.1269	0	0.718833	2.6338	1.39715	0.146825	0.833201
Cystatin-B OS=Homo sapiens GN=CSTB PE=1 SV=2	CYTB_HUMAN	737 kDa	17.233	26.565	23.452	22.4167	10.296	6.7616	8.3177	8.45843	2.65021	1.40611	0.0088548	2.05282
E3 SUMO-protein ligase RanBP2 OS=Homo sapiens GN=RANBP2 PE=1 SV=2	RBP2_HUMAN	284 kDa	3.8296	6.6412	6.5666	5.67913	2.0593	2.2539	2.0794	2.13087	2.66518	1.41423	0.0186602	1.72908
40S ribosomal protein S13 OS=Homo sapiens GN=RPS13 PE=1 SV=2	RS13_HUMAN	985 kDa	58.402	52.181	54.409	54.9973	19.563	22.539	19.755	20.619	2.66731	1.41539	7.52789e-05	4.12333
Replication factor C subunit 5 OS=Homo sapiens GN=RFC5 PE=1 SV=1	RFC5_HUMAN	131 kDa	2.8722	2.8462	2.8143	2.84423	2.0593	1.1269	0	1.06207	2.67802	1.42117	0.0402472	1.39526
ATP-binding cassette sub-family F member 2 OS=Homo sapiens GN=ABCF2 PE=1 SV=2	ABCF2_HUMAN	132 kDa	2.8722	3.795	1.8762	2.8478	2.0593	1.1269	0	1.06207	2.68138	1.42297	0.0930935	1.03108
THO complex subunit 4 OS=Homo sapiens GN=ALYREF PE=1 SV=3	THOC4_HUMAN	597 kDa	13.404	15.18	16.886	15.1567	5.1482	4.5078	7.278	5.64467	2.68513	1.42499	0.00190107	2.721
Dynactin subunit 2 OS=Homo sapiens GN=DCTN2 PE=1 SV=4	DCTN2_HUMAN	176 kDa	3.8296	3.795	3.7524	3.79233	1.0296	1.1269	2.0794	1.41197	2.68585	1.42538	0.00208733	2.68041
Stathmin OS=Homo sapiens GN=STMN1 PE=1 SV=3	STMN1_HUMAN	218 kDa	5.7444	2.8462	5.6286	4.73973	2.0593	1.1269	2.0794	1.7552	2.7004	1.43317	0.0403299	1.39437
Eukaryotic translation initiation factor 4H OS=Homo sapiens GN=EIF4H PE=1 SV=5	IF4H_HUMAN	259 kDa	6.7018	5.6925	4.6905	5.69493	3.0889	1.1269	2.0794	2.0984	2.71394	1.44039	0.0113886	1.94353
Plectin OS=Homo sapiens GN=PLEC PE=1 SV=3	PLEC_HUMAN	532 kDa	0.9574	0	1.8762	0.944533	0	0	1.0397	0.346567	2.7254	1.44647	0.405054	0.392487
39S ribosomal protein L39, mitochondrial OS=Homo sapiens GN=MRPL39 PE=1 SV=3	RM39_HUMAN	39 kDa	1.9148	0	0.93809	0.950963	0	0	1.0397	0.346567	2.74395	1.45626	0.406695	0.390732
Protein FAM98A OS=Homo sapiens GN=FAM98A PE=1 SV=1	FA98A_HUMAN	55 kDa	2.8722	1.8975	3.7524	2.8407	2.0593	0	1.0397	1.033	2.74995	1.45941	0.0867797	1.06158
Nuclear pore complex protein Nup205 OS=Homo sapiens GN=NUP205 PE=1 SV=3	NU205_HUMAN	228 kDa	0.9574	0	1.8762	0.944533	1.0296	0	0	0.3432	2.75214	1.46055	0.401448	0.39637
Prostaglandin E synthase 2 OS=Homo sapiens GN=PTGES2 PE=1 SV=1	PGES2_HUMAN	42 kDa	0.9574	0	1.8762	0.944533	1.0296	0	0	0.3432	2.75214	1.46055	0.401448	0.39637
WD repeat-containing protein 61 OS=Homo sapiens GN=WDR61 PE=1 SV=1	WDR61_HUMAN	34 kDa	1.9148	3.795	0	1.90327	1.0296	0	1.0397	0.689767	2.75929	1.4643	0.350302	0.455558
Tether containing UBX domain for GLUT4 OS=Homo sapiens GN=ASPSCR1 PE=1 SV=1	ASPC1_HUMAN	150 kDa	4.787	3.795	2.8143	3.79877	3.0889	0	1.0397	1.3762	2.76033	1.46484	0.0865557	1.0627
Cluster of Myosin-9 OS=Homo sapiens GN=MYH9 PE=1 SV=4 (MYH9_HUMAN)	MYH9_HUMAN [2]	994 kDa	68.933	56.925	56.286	60.7147	25.741	22.539	16.635	21.6383	2.80588	1.48846	0.00134224	2.87217
26S protease regulatory subunit 7 OS=Homo sapiens GN=PSMC2 PE=1 SV=3	PRS7_HUMAN	586 kDa	18.191	14.231	13.133	15.185	6.1779	6.7616	3.1191	5.35287	2.8368	1.50426	0.00671297	2.17309
Zinc transporter ZIP14 OS=Homo sapiens GN=SLC39A14 PE=1 SV=3	S39AE_HUMAN	300 kDa	7.6592	5.6925	7.5047	6.95213	5.1482	1.1269	1.0397	2.43827	2.85126	1.5116	0.0391951	1.40677
Pyridoxine-5'-phosphate oxidase OS=Homo sapiens GN=PNPO PE=1 SV=1	PNPO_HUMAN	412 kDa	8.6166	7.59	11.257	9.15453	4.1186	3.3808	2.0794	3.19293	2.86712	1.5196	0.00870425	2.06027
RNA-binding protein 39 OS=Homo sapiens GN=RBM39 PE=1 SV=2	RBM39_HUMAN	248 kDa	7.6592	2.8462	7.5047	6.00337	4.1186	0	2.0794	2.066	2.90579	1.53893	0.117204	0.931058
Cluster of Eukaryotic translation initiation factor 4 gamma 1 OS=Homo sapiens GN=EIF4G1 PE=1 SV=4 (IF4G1_HUMAN)	IF4G1_HUMAN [2]	430 kDa	10.531	11.385	8.4428	10.1196	4.1186	1.1269	5.1986	3.48137	2.90679	1.53943	0.0114338	1.94181
Uridine 5'-monophosphate synthase OS=Homo sapiens GN=UMPS PE=1 SV=1	UMPS_HUMAN	374 kDa	5.7444	9.4875	9.3809	8.20427	3.0889	2.2539	3.1191	2.82063	2.90866	1.54036	0.0130114	1.88567
Na(+)/H(+) exchange regulatory cofactor NHE-RF1 OS=Homo sapiens GN=SLC9A3R1 PE=1 SV=4	NHRF1_HUMAN	548 kDa	13.404	11.385	17.824	14.2043	8.2372	2.2539	4.1588	4.8833	2.90876	1.5404	0.0228992	1.64018
Neuroblast differentiation-associated protein AHNAK OS=Homo sapiens GN=AHNAK PE=1 SV=2	AHNK_HUMAN	574 kDa	16.276	18.026	14.071	16.1243	8.2372	4.5078	3.1191	5.28803	3.04921	1.60844	0.00475291	2.32304
Enhancer of rudimentary homolog OS=Homo sapiens GN=ERH PE=1 SV=1	ERH_HUMAN	12 kDa	3.8296	2.8462	2.8143	3.16337	1.0296	0	2.0794	1.03633	3.05246	1.60997	0.0362905	1.44021
Large neutral amino acids transporter small subunit 1 OS=Homo sapiens GN=SLC7A5 PE=1 SV=2	LAT1_HUMAN	326 kDa	4.787	8.5387	9.3809	7.56887	3.0889	2.2539	2.0794	2.47407	3.05928	1.61319	0.0243744	1.61307
Ladinin-1 OS=Homo sapiens GN=LAD1 PE=1 SV=2	LAD1_HUMAN	57 kDa	2.8722	0.94875	2.8143	2.21175	1.0296	1.1269	0	0.718833	3.07686	1.62146	0.109375	0.961083
Structural maintenance of chromosomes flexible hinge domain-containing protein 1 OS=Homo sapiens GN=SMCHD1 PE=1 SV=2	SMHD1_HUMAN	226 kDa	2.8722	1.8975	1.8762	2.2153	1.0296	1.1269	0	0.718833	3.0818	1.62377	0.0373588	1.42761
Xaa-Pro dipeptidase OS=Homo sapiens GN=PEPD PE=1 SV=3	PEPD_HUMAN	285 kDa	4.787	5.6925	9.3809	6.62013	2.0593	2.2539	2.0794	2.13087	3.10678	1.63542	0.0331429	1.47961
Serum paraoxonase/arylesterase 2 OS=Homo sapiens GN=PON2 PE=1 SV=3	PON2_HUMAN	301 kDa	9.574	2.8462	10.319	7.57973	5.1482	1.1269	1.0397	2.43827	3.10866	1.63629	0.133381	0.874906
Acyl-coenzyme A thioesterase 13 OS=Homo sapiens GN=ACOT13 PE=1 SV=1	ACO13_HUMAN	15 kDa	0	0	0.93809	0.312697	0	0	0	0.1	3.12697	1.64476	0.373901	0.427243
Leucine-rich repeat flightless-interacting protein 1 OS=Homo sapiens GN=LRRFIP1 PE=1 SV=2	LRRF1_HUMAN	89 kDa	0	0	0.93809	0.312697	0	0	0	0.1	3.12697	1.64476	0.373901	0.427243
Protein Red OS=Homo sapiens GN=IK PE=1 SV=3	RED_HUMAN	66 kDa	0	0	0.93809	0.312697	0	0	0	0.1	3.12697	1.64476	0.373901	0.427243
Lamin-B receptor OS=Homo sapiens GN=LBR PE=1 SV=2	LBR_HUMAN	71 kDa	0	0	0.93809	0.312697	0	0	0	0.1	3.12697	1.64476	0.373901	0.427243
Coiled-coil-helix-coiled-coil-helix domain-containing protein 2, mitochondrial OS=Homo sapiens GN=CHCHD2 PE=1 SV=1	CHCH2_HUMAN	16 kDa	0	0	0.93809	0.312697	0	0	0	0.1	3.12697	1.64476	0.373901	0.427243
DNA replication licensing factor MCM2 OS=Homo sapiens GN=MCM2 PE=1 SV=4	MCM2_HUMAN	343 kDa	5.7444	7.59	10.319	7.88447	4.1186	3.3808	0	2.4998	3.15404	1.6572	0.0427361	1.36921
Laminin subunit beta-1 OS=Homo sapiens GN=LAMB1 PE=1 SV=2	LAMB1_HUMAN	198 kDa	0	0.94875	0	0.31625	0	0	0	0.1	3.1625	1.66107	0.373901	0.427243
LIM and senescent cell antigen-like-containing domain protein 1 OS=Homo sapiens GN=LIMS1 PE=1 SV=4	LIMS1_HUMAN	37 kDa	0	0.94875	0	0.31625	0	0	0	0.1	3.1625	1.66107	0.373901	0.427243
Cluster of Serine/threonine-protein phosphatase 2B catalytic subunit alpha isoform OS=Homo sapiens GN=PPP3CA PE=1 SV=1 (PP2BA_HUMAN)	PP2BA_HUMAN	59 kDa	0	0.94875	0	0.31625	0	0	0	0.1	3.1625	1.66107	0.373901	0.427243
Ubiquitin-like modifier-activating enzyme 6 OS=Homo sapiens GN=UBA6 PE=1 SV=1	UBA6_HUMAN	118 kDa	0	0.94875	0	0.31625	0	0	0	0.1	3.1625	1.66107	0.373901	0.427243
U5 small nuclear ribonucleoprotein 200 kDa helicase OS=Homo sapiens GN=SNRNP200 PE=1 SV=2	U520_HUMAN	818 kDa	40.211	25.616	34.709	33.512	17.504	6.7616	7.278	10.5145	3.18721	1.67229	0.0139766	1.8546
Something about silencing protein 10 OS=Homo sapiens GN=UTP3 PE=1 SV=1	SAS10_HUMAN	55 kDa	0.9574	0	0	0.319133	0	0	0	0.1	3.19133	1.67416	0.373901	0.427243
Pumilio domain-containing protein KIAA0020 OS=Homo sapiens GN=KIAA0020 PE=1 SV=3	K0020_HUMAN	74 kDa	0.9574	0	0	0.319133	0	0	0	0.1	3.19133	1.67416	0.373901	0.427243
Inactive tyrosine-protein kinase 7 OS=Homo sapiens GN=PTK7 PE=1 SV=2	PTK7_HUMAN	118 kDa	0.9574	0	0	0.319133	0	0	0	0.1	3.19133	1.67416	0.373901	0.427243
Serine/threonine-protein phosphatase 2A 56 kDa regulatory subunit delta isoform OS=Homo sapiens GN=PPP2R5D PE=1 SV=1	2A5D_HUMAN	70 kDa	0.9574	0	0	0.319133	0	0	0	0.1	3.19133	1.67416	0.373901	0.427243
Protein PRRC2A OS=Homo sapiens GN=PRRC2A PE=1 SV=3	PRC2A_HUMAN	229 kDa	0.9574	0	0	0.319133	0	0	0	0.1	3.19133	1.67416	0.373901	0.427243
Dolichyl-diphosphooligosaccharide--protein glycosyltransferase subunit STT3B OS=Homo sapiens GN=STT3B PE=1 SV=1	STT3B_HUMAN	94 kDa	0.9574	0	0	0.319133	0	0	0	0.1	3.19133	1.67416	0.373901	0.427243
Serine/arginine-rich splicing factor 11 OS=Homo sapiens GN=SRSF11 PE=1 SV=1	SRS11_HUMAN	54 kDa	0.9574	0	0	0.319133	0	0	0	0.1	3.19133	1.67416	0.373901	0.427243
Proteasome subunit beta type-7 OS=Homo sapiens GN=PSMB7 PE=1 SV=1	PSB7_HUMAN	30 kDa	0.9574	0	0	0.319133	0	0	0	0.1	3.19133	1.67416	0.373901	0.427243
LIM domain and actin-binding protein 1 OS=Homo sapiens GN=LIMA1 PE=1 SV=1	LIMA1_HUMAN	85 kDa	0.9574	2.8462	2.8143	2.20597	2.0593	0	0	0.686433	3.21366	1.68422	0.176847	0.752401
Splicing factor 3A subunit 3 OS=Homo sapiens GN=SF3A3 PE=1 SV=1	SF3A3_HUMAN	163 kDa	6.7018	2.8462	3.7524	4.43347	2.0593	0	2.0794	1.37957	3.21367	1.68422	0.0869555	1.0607
ER membrane protein complex subunit 1 OS=Homo sapiens GN=EMC1 PE=1 SV=1	EMC1_HUMAN	112 kDa	3.8296	0	2.8143	2.21463	2.0593	0	0	0.686433	3.22629	1.68988	0.316287	0.499918
Phosphoacetylglucosamine mutase OS=Homo sapiens GN=PGM3 PE=1 SV=1	AGM1_HUMAN	191 kDa	5.7444	4.7437	3.7524	4.74683	1.0296	3.3808	0	1.47013	3.22885	1.69102	0.0468928	1.32889
Nuclear autoantigenic sperm protein OS=Homo sapiens GN=NASP PE=1 SV=2	NASP_HUMAN	472 kDa	11.489	15.18	11.257	12.642	5.1482	2.2539	4.1588	3.85363	3.28054	1.71393	0.00453601	2.34333
C-1-tetrahydrofolate synthase, cytoplasmic OS=Homo sapiens GN=MTHFD1 PE=1 SV=3	C1TC_HUMAN	617 kDa	20.105	17.077	22.514	19.8987	7.2075	2.2539	8.3177	5.92637	3.35765	1.74745	0.00459677	2.33755
Ferritin light chain OS=Homo sapiens GN=FTL PE=1 SV=2	FRIL_HUMAN	533 kDa	18.191	11.385	16.886	15.4873	5.1482	4.5078	4.1588	4.60493	3.3632	1.74984	0.00665861	2.17662
Muscleblind-like protein 3 OS=Homo sapiens GN=MBNL3 PE=2 SV=2	MBNL3_HUMAN	171 kDa	3.8296	6.6412	3.7524	4.74107	2.0593	1.1269	1.0397	1.40863	3.36572	1.75092	0.0294733	1.53057
Alpha-2-macroglobulin OS=Homo sapiens GN=A2M PE=1 SV=3	A2MG_HUMAN	407 kDa	11.489	9.4875	11.257	10.7445	5.1482	3.3808	1.0397	3.18957	3.36864	1.75217	0.00496848	2.30378
Synaptobrevin homolog YKT6 OS=Homo sapiens GN=YKT6 PE=1 SV=1	YKT6_HUMAN	22 kDa	2.8722	0	0.93809	1.2701	0	1.1269	0	0.375633	3.38121	1.75754	0.388433	0.410684
1,4-alpha-glucan-branching enzyme OS=Homo sapiens GN=GBE1 PE=1 SV=3	GLGB_HUMAN	144 kDa	2.8722	2.8462	5.6286	3.78233	0	2.2539	1.0397	1.09787	3.44517	1.78457	0.0763137	1.1174
Regulator of chromosome condensation OS=Homo sapiens GN=RCC1 PE=1 SV=1	RCC1_HUMAN	420 kDa	13.404	9.4875	10.319	11.0702	2.0593	3.3808	4.1588	3.19963	3.45982	1.7907	0.00419401	2.37737
Nucleosome assembly protein 1-like 1 OS=Homo sapiens GN=NAP1L1 PE=1 SV=1	NP1L1_HUMAN	639 kDa	18.191	22.77	26.267	22.4093	4.1186	6.7616	8.3177	6.3993	3.50184	1.80811	0.00373365	2.42787
Peptidyl-prolyl cis-trans isomerase FKBP1A OS=Homo sapiens GN=FKBP1A PE=1 SV=2	FKB1A_HUMAN	286 kDa	4.787	10.436	7.5047	7.5759	2.0593	2.2539	2.0794	2.13087	3.55531	1.82998	0.0289478	1.53838
LIM and SH3 domain protein 1 OS=Homo sapiens GN=LASP1 PE=1 SV=2	LASP1_HUMAN	402 kDa	7.6592	15.18	11.257	11.3654	4.1186	2.2539	3.1191	3.16387	3.59225	1.84489	0.0214785	1.668
A-kinase anchor protein 1, mitochondrial OS=Homo sapiens GN=AKAP1 PE=1 SV=1	AKAP1_HUMAN	97 kDa	0	1.8975	1.8762	1.2579	0	0	1.0397	0.346567	3.6296	1.85981	0.273251	0.563438
Importin subunit alpha-4 OS=Homo sapiens GN=KPNA4 PE=1 SV=1	IMA4_HUMAN	58 kDa	0	0	3.7524	1.2508	1.0296	0	0	0.3432	3.64452	1.86573	0.522639	0.281798
U3 small nucleolar RNA-associated protein 18 homolog OS=Homo sapiens GN=UTP18 PE=1 SV=3	UTP18_HUMAN	62 kDa	1.9148	0	1.8762	1.26367	0	0	1.0397	0.346567	3.64624	1.86641	0.272143	0.565202
Transcription factor BTF3 OS=Homo sapiens GN=BTF3 PE=1 SV=1	BTF3_HUMAN	22 kDa	0.9574	0	2.8143	1.25723	1.0296	0	0	0.3432	3.66327	1.87313	0.364669	0.438101
Chromobox protein homolog 3 OS=Homo sapiens GN=CBX3 PE=1 SV=4	CBX3_HUMAN	164 kDa	5.7444	3.795	5.6286	5.056	2.0593	0	2.0794	1.37957	3.66492	1.87378	0.0170824	1.76745
THO complex subunit 2 OS=Homo sapiens GN=THOC2 PE=1 SV=2	THOC2_HUMAN	183 kDa	1.9148	0	1.8762	1.26367	1.0296	0	0	0.3432	3.68201	1.88049	0.269737	0.569059
Serine/arginine-rich splicing factor 9 OS=Homo sapiens GN=SRSF9 PE=1 SV=1	SRSF9_HUMAN	26 kDa	1.9148	0	1.8762	1.26367	1.0296	0	0	0.3432	3.68201	1.88049	0.269737	0.569059
Ran GTPase-activating protein 1 OS=Homo sapiens GN=RANGAP1 PE=1 SV=1	RAGP1_HUMAN	64 kDa	3.8296	0	0	1.27653	0	0	1.0397	0.346567	3.68337	1.88103	0.520783	0.283343
Cluster of UDP-glucuronosyltransferase 1-9 OS=Homo sapiens GN=UGT1A9 PE=1 SV=1 (UD19_HUMAN)	UD19_HUMAN [3]	397 kDa	14.361	9.4875	11.257	11.7018	5.1482	2.2539	2.0794	3.1605	3.70253	1.88851	0.00795328	2.09945
Adenylate kinase isoenzyme 1 OS=Homo sapiens GN=AK1 PE=1 SV=3	KAD1_HUMAN	145 kDa	4.787	3.795	3.7524	4.11147	0	2.2539	1.0397	1.09787	3.74496	1.90495	0.0147684	1.83067
Calponin-3 OS=Homo sapiens GN=CNN3 PE=1 SV=1	CNN3_HUMAN	246 kDa	9.574	7.59	3.7524	6.97213	0	4.5078	1.0397	1.84917	3.77042	1.91472	0.0790352	1.10218
Synaptosomal-associated protein 23 OS=Homo sapiens GN=SNAP23 PE=1 SV=1	SNP23_HUMAN	23 kDa	1.9148	2.8462	3.7524	2.8378	0	2.2539	0	0.7513	3.77719	1.91731	0.0858557	1.06623
Kinectin OS=Homo sapiens GN=KTN1 PE=1 SV=1	KTN1_HUMAN	156 kDa	4.787	1.8975	1.8762	2.85357	0	1.1269	1.0397	0.7222	3.95121	1.9823	0.107874	0.967082
Cluster of HLA class I histocompatibility antigen, A-2 alpha chain OS=Homo sapiens GN=HLA-A PE=1 SV=1 (1A02_HUMAN)	1A02_HUMAN [5]	41 kDa	1.9148	4.7437	5.6286	4.0957	1.0296	0	2.0794	1.03633	3.95211	1.98262	0.073744	1.13227
DBIRD complex subunit KIAA1967 OS=Homo sapiens GN=KIAA1967 PE=1 SV=2	K1967_HUMAN	103 kDa	3.8296	2.8462	5.6286	4.10147	2.0593	0	1.0397	1.033	3.97044	1.9893	0.0383019	1.41678
Proteasome subunit alpha type-3 OS=Homo sapiens GN=PSMA3 PE=1 SV=2	PSA3_HUMAN	28 kDa	3.8296	3.795	4.6905	4.10503	2.0593	0	1.0397	1.033	3.97389	1.99055	0.00976689	2.01024
Cluster of EF-hand domain-containing protein D2 OS=Homo sapiens GN=EFHD2 PE=1 SV=1 (EFHD2_HUMAN)	EFHD2_HUMAN [2]	27 kDa	2.8722	4.7437	4.6905	4.10213	3.0889	0	0	1.02963	3.98407	1.99424	0.0625259	1.20394
Regulator of nonsense transcripts 1 OS=Homo sapiens GN=UPF1 PE=1 SV=2	RENT1_HUMAN	287 kDa	11.489	6.6412	7.5047	8.54497	2.0593	2.2539	2.0794	2.13087	4.01009	2.00363	0.0127208	1.89549
Nucleoprotein TPR OS=Homo sapiens GN=TPR PE=1 SV=3	TPR_HUMAN	172 kDa	4.787	6.6412	5.6286	5.6856	2.0593	1.1269	1.0397	1.40863	4.03625	2.01302	0.00242242	2.61575
Cluster of cAMP-dependent protein kinase catalytic subunit alpha OS=Homo sapiens GN=PRKACA PE=1 SV=2 (KAPCA_HUMAN)	KAPCA_HUMAN	142 kDa	5.7444	3.795	3.7524	4.4306	1.0296	2.2539	0	1.0945	4.04806	2.01723	0.0226435	1.64506
Receptor expression-enhancing protein 6 OS=Homo sapiens GN=REEP6 PE=1 SV=1	REEP6_HUMAN	341 kDa	12.446	6.6412	11.257	10.1147	1.0296	2.2539	4.1588	2.48077	4.07726	2.0276	0.0185426	1.73183
RNA-binding protein EWS OS=Homo sapiens GN=EWSR1 PE=1 SV=1	EWS_HUMAN	68 kDa	3.8296	2.8462	1.8762	2.85067	1.0296	0	1.0397	0.689767	4.1328	2.04712	0.0308161	1.51122
Asialoglycoprotein receptor 1 OS=Homo sapiens GN=ASGR1 PE=1 SV=2	ASGR1_HUMAN	364 kDa	10.531	7.59	16.886	11.669	4.1186	2.2539	2.0794	2.8173	4.14191	2.0503	0.034875	1.45749
Pro-cathepsin H OS=Homo sapiens GN=CTSH PE=1 SV=4	CATH_HUMAN	37 kDa	3.8296	1.8975	2.8143	2.84713	2.0593	0	0	0.686433	4.14772	2.05232	0.0710144	1.14865
Cluster of AP-3 complex subunit mu-1 OS=Homo sapiens GN=AP3M1 PE=1 SV=1 (AP3M1_HUMAN)	AP3M1_HUMAN	47 kDa	0	1.8975	2.8143	1.5706	0	1.1269	0	0.375633	4.18121	2.06392	0.259332	0.586143
Nuclear protein localization protein 4 homolog OS=Homo sapiens GN=NPLOC4 PE=1 SV=3	NPL4_HUMAN	68 kDa	1.9148	1.8975	0.93809	1.58346	0	1.1269	0	0.375633	4.21545	2.07569	0.0712906	1.14697
Serine/threonine-protein kinase PRP4 homolog OS=Homo sapiens GN=PRPF4B PE=1 SV=3	PRP4B_HUMAN	117 kDa	2.8722	0.94875	0.93809	1.58635	0	1.1269	0	0.375633	4.22313	2.07831	0.179289	0.746445
Splicing factor 3B subunit 5 OS=Homo sapiens GN=SF3B5 PE=1 SV=1	SF3B5_HUMAN	10 kDa	3.8296	0	0.93809	1.58923	0	1.1269	0	0.375633	4.2308	2.08093	0.37338	0.427849
Cluster of Guanine nucleotide-binding protein G(i) subunit alpha-2 OS=Homo sapiens GN=GNAI2 PE=1 SV=3 (GNAI2_HUMAN)	GNAI2_HUMAN [5]	173 kDa	4.787	7.59	5.6286	6.00187	2.0593	1.1269	1.0397	1.40863	4.26077	2.09112	0.00675312	2.1705
Mitotic checkpoint protein BUB3 OS=Homo sapiens GN=BUB3 PE=1 SV=1	BUB3_HUMAN	146 kDa	4.787	5.6925	3.7524	4.74397	0	2.2539	1.0397	1.09787	4.32108	2.11139	0.0132282	1.8785
Hematological and neurological expressed 1 protein OS=Homo sapiens GN=HN1 PE=1 SV=3	HN1_HUMAN	206 kDa	6.7018	7.59	9.3809	7.8909	3.0889	1.1269	1.0397	1.75183	4.50437	2.17132	0.0040294	2.39476
Zinc finger CCCH domain-containing protein 15 OS=Homo sapiens GN=ZC3H15 PE=1 SV=1	ZC3HF_HUMAN	49 kDa	0	3.795	0.93809	1.5777	0	0	1.0397	0.346567	4.55236	2.18662	0.360292	0.443345
Cluster of Phosphatidylinositol-binding clathrin assembly protein OS=Homo sapiens GN=PICALM PE=1 SV=2 (PICAL_HUMAN)	PICAL_HUMAN	71 kDa	2.8722	0.94875	0.93809	1.58635	0	0	1.0397	0.346567	4.57732	2.1945	0.164853	0.782903
Palmitoyl-protein thioesterase 1 OS=Homo sapiens GN=PPT1 PE=1 SV=1	PPT1_HUMAN	34 kDa	5.7444	3.795	4.6905	4.7433	2.0593	0	1.0397	1.033	4.59177	2.19905	0.0105756	1.97569
Integrin alpha-V OS=Homo sapiens GN=ITGAV PE=1 SV=2	ITAV_HUMAN	151 kDa	6.7018	5.6925	6.5666	6.3203	3.0889	0	1.0397	1.3762	4.59257	2.1993	0.00676839	2.16951
Transmembrane protein 43 OS=Homo sapiens GN=TMEM43 PE=1 SV=1	TMM43_HUMAN	45 kDa	0.9574	1.8975	1.8762	1.57703	1.0296	0	0	0.3432	4.59509	2.20009	0.0559022	1.25257
Nesprin-1 OS=Homo sapiens GN=SYNE1 PE=1 SV=3	SYNE1_HUMAN	1011 kDa	1.9148	0.94875	1.8762	1.57992	1.0296	0	0	0.3432	4.60349	2.20273	0.056876	1.24507
Choline dehydrogenase, mitochondrial OS=Homo sapiens GN=CHDH PE=2 SV=2	CHDH_HUMAN	65 kDa	1.9148	1.8975	0.93809	1.58346	1.0296	0	0	0.3432	4.61382	2.20596	0.0580231	1.2364
Far upstream element-binding protein 3 OS=Homo sapiens GN=FUBP3 PE=1 SV=2	FUBP3_HUMAN	62 kDa	4.787	2.8462	1.8762	3.1698	2.0593	0	0	0.686433	4.61778	2.2072	0.0863211	1.06388
Cluster of Cyclin-dependent kinase 6 OS=Homo sapiens GN=CDK6 PE=1 SV=1 (CDK6_HUMAN)	CDK6_HUMAN [3]	289 kDa	11.489	9.4875	9.3809	10.1191	1.0296	2.2539	3.1191	2.1342	4.74142	2.24532	0.000950446	3.02207
Insulin-degrading enzyme OS=Homo sapiens GN=IDE PE=1 SV=4	IDE_HUMAN	133 kDa	7.6592	3.795	3.7524	5.06887	2.0593	1.1269	0	1.06207	4.77264	2.25479	0.0482775	1.31626
60S ribosomal protein L28 OS=Homo sapiens GN=RPL28 PE=1 SV=3	RL28_HUMAN	16 kDa	2.8722	3.795	3.7524	3.4732	0	1.1269	1.0397	0.7222	4.80919	2.2658	0.00427108	2.36946
Methionine aminopeptidase 1 OS=Homo sapiens GN=METAP1 PE=1 SV=2	AMPM1_HUMAN	184 kDa	10.531	2.8462	7.5047	6.96063	2.0593	2.2539	0	1.43773	4.84139	2.27542	0.0783689	1.10586
Annexin A11 OS=Homo sapiens GN=ANXA11 PE=1 SV=1	ANX11_HUMAN	54 kDa	5.7444	3.795	5.6286	5.056	3.0889	0	0	1.02963	4.91049	2.29587	0.0290075	1.53749
Cullin-2 OS=Homo sapiens GN=CUL2 PE=1 SV=2	CUL2_HUMAN	87 kDa	0	0.94875	4.6905	1.87975	0	1.1269	0	0.375633	5.00422	2.32314	0.367039	0.435287
Aminoacyl tRNA synthase complex-interacting multifunctional protein 2 OS=Homo sapiens GN=AIMP2 PE=1 SV=2	AIMP2_HUMAN	35 kDa	1.9148	0	3.7524	1.88907	0	1.1269	0	0.375633	5.02902	2.33028	0.25732	0.589526
Solute carrier family 2, facilitated glucose transporter member 14 OS=Homo sapiens GN=SLC2A14 PE=2 SV=1	GTR14_HUMAN (+1)	56 kDa	0.9574	1.8975	2.8143	1.88973	0	1.1269	0	0.375633	5.03079	2.33079	0.0817499	1.08751
Chromodomain-helicase-DNA-binding protein 4 OS=Homo sapiens GN=CHD4 PE=1 SV=2	CHD4_HUMAN	218 kDa	1.9148	0.94875	2.8143	1.89262	0	1.1269	0	0.375633	5.03847	2.33299	0.0820294	1.08603
28S ribosomal protein S29, mitochondrial OS=Homo sapiens GN=DAP3 PE=1 SV=1	RT29_HUMAN	46 kDa	4.787	0.94875	4.6905	3.47542	2.0593	0	0	0.686433	5.06301	2.33999	0.12446	0.904972
Cluster of Ras-related protein Ral-B OS=Homo sapiens GN=RALB PE=1 SV=1 (RALB_HUMAN)	RALB_HUMAN [2]	23 kDa	2.8722	1.8975	0.93809	1.9026	0	1.1269	0	0.375633	5.06504	2.34057	0.0858113	1.06646
Proteasome subunit beta type-2 OS=Homo sapiens GN=PSMB2 PE=1 SV=1	PSB2_HUMAN	23 kDa	6.7018	2.8462	6.5666	5.37153	2.0593	0	1.0397	1.033	5.19994	2.37849	0.0359594	1.44419
Importin subunit alpha-2 OS=Homo sapiens GN=KPNA2 PE=1 SV=1	IMA2_HUMAN	58 kDa	3.8296	3.795	3.7524	3.79233	1.0296	1.1269	0	0.718833	5.27568	2.39936	0.0010463	2.98034
3-ketoacyl-CoA thiolase, peroxisomal OS=Homo sapiens GN=ACAA1 PE=1 SV=2	THIK_HUMAN	249 kDa	10.531	10.436	12.195	11.054	4.1186	0	2.0794	2.066	5.35044	2.41966	0.00242437	2.6154
Beta-hexosaminidase subunit beta OS=Homo sapiens GN=HEXB PE=1 SV=3	HEXB_HUMAN	63 kDa	1.9148	2.8462	0.93809	1.8997	1.0296	0	0	0.3432	5.53525	2.46865	0.0745049	1.12782
Proline synthase co-transcribed bacterial homolog protein OS=Homo sapiens GN=PROSC PE=1 SV=1	PROSC_HUMAN	30 kDa	2.8722	2.8462	0	1.90613	1.0296	0	0	0.3432	5.554	2.47353	0.197732	0.703924
Cluster of Eukaryotic peptide chain release factor GTP-binding subunit ERF3A OS=Homo sapiens GN=GSPT1 PE=1 SV=1 (ERF3A_HUMAN)	ERF3A_HUMAN [2]	185 kDa	9.574	6.6412	8.4428	8.21933	2.0593	2.2539	0	1.43773	5.71687	2.51523	0.00372614	2.42874
Ribonuclease T2 OS=Homo sapiens GN=RNASET2 PE=1 SV=2	RNT2_HUMAN	288 kDa	9.574	11.385	15.948	12.3023	2.0593	2.2539	2.0794	2.13087	5.77339	2.52942	0.00584262	2.23339
Barrier-to-autointegration factor OS=Homo sapiens GN=BANF1 PE=1 SV=1	BAF_HUMAN	230 kDa	8.6166	11.385	11.257	10.4195	2.0593	2.2539	1.0397	1.7843	5.83956	2.54586	0.000906847	3.04247
Rho GTPase-activating protein 18 OS=Homo sapiens GN=ARHGAP18 PE=1 SV=3	RHG18_HUMAN	75 kDa	1.9148	3.795	0.93809	2.21596	0	1.1269	0	0.375633	5.89927	2.56054	0.115683	0.93673
Saccharopine dehydrogenase-like oxidoreductase OS=Homo sapiens GN=SCCPDH PE=1 SV=1	SCPDL_HUMAN	47 kDa	0	0	1.8762	0.6254	0	0	0	0.1	6.254	2.64478	0.373901	0.427243
TIP41-like protein OS=Homo sapiens GN=TIPRL PE=1 SV=2	TIPRL_HUMAN	31 kDa	0	0	1.8762	0.6254	0	0	0	0.1	6.254	2.64478	0.373901	0.427243
Elongator complex protein 1 OS=Homo sapiens GN=IKBKAP PE=1 SV=3	ELP1_HUMAN	150 kDa	0	0	1.8762	0.6254	0	0	0	0.1	6.254	2.64478	0.373901	0.427243
Cytoskeleton-associated protein 5 OS=Homo sapiens GN=CKAP5 PE=1 SV=3	CKAP5_HUMAN	226 kDa	0	0	1.8762	0.6254	0	0	0	0.1	6.254	2.64478	0.373901	0.427243
DNA replication licensing factor MCM4 OS=Homo sapiens GN=MCM4 PE=1 SV=5	MCM4_HUMAN	174 kDa	10.531	8.5387	7.5047	8.85813	2.0593	1.1269	1.0397	1.40863	6.28846	2.65271	0.00140656	2.85184
Cell division cycle 5-like protein OS=Homo sapiens GN=CDC5L PE=1 SV=2	CDC5L_HUMAN	92 kDa	0	0.94875	0.93809	0.628947	0	0	0	0.1	6.28947	2.65294	0.116129	0.935058
Sodium/potassium-transporting ATPase subunit beta-3 OS=Homo sapiens GN=ATP1B3 PE=1 SV=1	AT1B3_HUMAN	32 kDa	4.787	4.7437	4.6905	4.7404	0	2.2539	0	0.7513	6.3096	2.65755	0.0060628	2.21733
Glycogen debranching enzyme OS=Homo sapiens GN=AGL PE=1 SV=3	GDE_HUMAN	175 kDa	0	1.8975	0	0.6325	0	0	0	0.1	6.325	2.66107	0.373901	0.427243
Acylamino-acid-releasing enzyme OS=Homo sapiens GN=APEH PE=1 SV=4	ACPH_HUMAN	81 kDa	0	1.8975	0	0.6325	0	0	0	0.1	6.325	2.66107	0.373901	0.427243
Microsomal triglyceride transfer protein large subunit OS=Homo sapiens GN=MTTP PE=1 SV=1	MTP_HUMAN	99 kDa	0	1.8975	0	0.6325	0	0	0	0.1	6.325	2.66107	0.373901	0.427243
Protein flightless-1 homolog OS=Homo sapiens GN=FLII PE=1 SV=2	FLII_HUMAN	145 kDa	0	1.8975	0	0.6325	0	0	0	0.1	6.325	2.66107	0.373901	0.427243
Myotrophin OS=Homo sapiens GN=MTPN PE=1 SV=2	MTPN_HUMAN	13 kDa	0	1.8975	0	0.6325	0	0	0	0.1	6.325	2.66107	0.373901	0.427243
Major vault protein OS=Homo sapiens GN=MVP PE=1 SV=4	MVP_HUMAN	99 kDa	1.9148	0	0	0.638267	0	0	0	0.1	6.38267	2.67416	0.373901	0.427243
Interferon regulatory factor 2-binding protein 2 OS=Homo sapiens GN=IRF2BP2 PE=1 SV=2	I2BP2_HUMAN	61 kDa	1.9148	0	0	0.638267	0	0	0	0.1	6.38267	2.67416	0.373901	0.427243
U6 snRNA-associated Sm-like protein LSm7 OS=Homo sapiens GN=LSM7 PE=1 SV=1	LSM7_HUMAN	12 kDa	1.9148	0	0	0.638267	0	0	0	0.1	6.38267	2.67416	0.373901	0.427243
14 kDa phosphohistidine phosphatase OS=Homo sapiens GN=PHPT1 PE=1 SV=1	PHP14_HUMAN	14 kDa	1.9148	2.8462	1.8762	2.2124	0	0	1.0397	0.346567	6.38376	2.67441	0.0165106	1.78224
Beta-lactamase-like protein 2 OS=Homo sapiens GN=LACTB2 PE=1 SV=2	LACB2_HUMAN	33 kDa	2.8722	1.8975	1.8762	2.2153	0	0	1.0397	0.346567	6.39213	2.6763	0.0173438	1.76086
Acetolactate synthase-like protein OS=Homo sapiens GN=ILVBL PE=1 SV=2	ILVBL_HUMAN	68 kDa	2.8722	1.8975	1.8762	2.2153	0	0	1.0397	0.346567	6.39213	2.6763	0.0173438	1.76086
Complement C4-A OS=Homo sapiens GN=C4A PE=1 SV=1	CO4A_HUMAN (+1)	193 kDa	0.9574	0.94875	4.6905	2.19888	1.0296	0	0	0.3432	6.407	2.67965	0.224334	0.649105
Zinc phosphodiesterase ELAC protein 2 OS=Homo sapiens GN=ELAC2 PE=1 SV=2	RNZ2_HUMAN	92 kDa	2.8722	0.94875	2.8143	2.21175	1.0296	0	0	0.3432	6.44449	2.68807	0.0601065	1.22108
Coiled-coil domain-containing protein 58 OS=Homo sapiens GN=CCDC58 PE=1 SV=1	CCD58_HUMAN	17 kDa	1.9148	3.795	1.8762	2.52867	0	1.1269	0	0.375633	6.73174	2.75098	0.0430641	1.36588
Protein transport protein Sec24C OS=Homo sapiens GN=SEC24C PE=1 SV=3	SC24C_HUMAN	118 kDa	6.7018	2.8462	5.6286	5.05887	1.0296	1.1269	0	0.718833	7.03761	2.81509	0.0226713	1.64452
Vacuolar protein sorting-associated protein VTA1 homolog OS=Homo sapiens GN=VTA1 PE=1 SV=1	VTA1_HUMAN	34 kDa	0.9574	2.8462	3.7524	2.51867	0	0	1.0397	0.346567	7.26748	2.86146	0.0718544	1.14355
Transmembrane protein 214 OS=Homo sapiens GN=TMEM214 PE=1 SV=2	TM214_HUMAN	77 kDa	1.9148	2.8462	2.8143	2.5251	0	0	1.0397	0.346567	7.28604	2.86514	0.00919247	2.03657
U5 small nuclear ribonucleoprotein 40 kDa protein OS=Homo sapiens GN=SNRNP40 PE=1 SV=1	SNR40_HUMAN	39 kDa	3.8296	0	3.7524	2.52733	0	0	1.0397	0.346567	7.29249	2.86641	0.171435	0.765901
Poly(U)-binding-splicing factor PUF60 OS=Homo sapiens GN=PUF60 PE=1 SV=1	PUF60_HUMAN	60 kDa	2.8722	1.8975	2.8143	2.528	0	0	1.0397	0.346567	7.29441	2.86679	0.00963794	2.01602
Hematological and neurological expressed 1-like protein OS=Homo sapiens GN=HN1L PE=1 SV=1	HN1L_HUMAN	20 kDa	2.8722	2.8462	1.8762	2.53153	0	0	1.0397	0.346567	7.30461	2.86881	0.0101786	1.99231
Prolow-density lipoprotein receptor-related protein 1 OS=Homo sapiens GN=LRP1 PE=1 SV=2	LRP1_HUMAN	505 kDa	1.9148	2.8462	2.8143	2.5251	1.0296	0	0	0.3432	7.35752	2.87922	0.00896998	2.04721
GDP-fucose protein O-fucosyltransferase 1 OS=Homo sapiens GN=POFUT1 PE=1 SV=1	OFUT1_HUMAN	44 kDa	1.9148	2.8462	2.8143	2.5251	1.0296	0	0	0.3432	7.35752	2.87922	0.00896998	2.04721
Bifunctional 3'-phosphoadenosine 5'-phosphosulfate synthase 1 OS=Homo sapiens GN=PAPSS1 PE=1 SV=2	PAPS1_HUMAN	71 kDa	1.9148	3.795	1.8762	2.52867	1.0296	0	0	0.3432	7.36791	2.88126	0.0386223	1.41316
Nucleolar transcription factor 1 OS=Homo sapiens GN=UBTF PE=1 SV=1	UBF1_HUMAN	89 kDa	2.8722	1.8975	3.7524	2.8407	0	1.1269	0	0.375633	7.56243	2.91885	0.0196442	1.70677
Epididymal secretory protein E1 OS=Homo sapiens GN=NPC2 PE=1 SV=1	NPC2_HUMAN	17 kDa	3.8296	1.8975	2.8143	2.84713	0	0	1.0397	0.346567	8.21525	3.03831	0.0189913	1.72145
Caprin-1 OS=Homo sapiens GN=CAPRIN1 PE=1 SV=2	CAPR1_HUMAN	78 kDa	3.8296	3.795	0.93809	2.85423	1.0296	0	0	0.3432	8.31652	3.05598	0.0691489	1.16021
Eukaryotic translation initiation factor 3 subunit H OS=Homo sapiens GN=EIF3H PE=1 SV=1	EIF3H_HUMAN	40 kDa	4.787	6.6412	6.5666	5.99827	1.0296	1.1269	0	0.718833	8.34445	3.06082	0.00170194	2.76905
Putative RNA-binding protein Luc7-like 1 OS=Homo sapiens GN=LUC7L PE=1 SV=1	LUC7L_HUMAN	44 kDa	3.8296	2.8462	2.8143	3.16337	0	0	1.0397	0.346567	9.12773	3.19026	0.00423624	2.37302
Nuclear pore complex protein Nup153 OS=Homo sapiens GN=NUP153 PE=1 SV=2	NU153_HUMAN	154 kDa	0	0	2.8143	0.9381	0	0	0	0.1	9.381	3.22974	0.373901	0.427243
Thioredoxin domain-containing protein 9 OS=Homo sapiens GN=TXNDC9 PE=1 SV=2	TXND9_HUMAN	27 kDa	0	0.94875	1.8762	0.94165	0	0	0	0.1	9.4165	3.23519	0.157101	0.803822
Beta-galactosidase OS=Homo sapiens GN=GLB1 PE=1 SV=2	BGAL_HUMAN	76 kDa	0.9574	0	1.8762	0.944533	0	0	0	0.1	9.44533	3.2396	0.156142	0.80648
SRSF protein kinase 1 OS=Homo sapiens GN=SRPK1 PE=1 SV=2	SRPK1_HUMAN	74 kDa	0.9574	0	1.8762	0.944533	0	0	0	0.1	9.44533	3.2396	0.156142	0.80648
Deoxyuridine 5'-triphosphate nucleotidohydrolase, mitochondrial OS=Homo sapiens GN=DUT PE=1 SV=4	DUT_HUMAN	27 kDa	0	1.8975	0.93809	0.945197	0	0	0	0.1	9.45197	3.24061	0.159515	0.797199
Niban-like protein 1 OS=Homo sapiens GN=FAM129B PE=1 SV=3	NIBL1_HUMAN	84 kDa	0.9574	0.94875	0.93809	0.94808	0	0	0	0.1	9.4808	3.24501	7.22053e-09	8.14143
Dynein light chain roadblock-type 1 OS=Homo sapiens GN=DYNLRB1 PE=1 SV=3	DLRB1_HUMAN	11 kDa	0	2.8462	0	0.948733	0	0	0	0.1	9.48733	3.246	0.373901	0.427243
Scavenger receptor class B member 1 OS=Homo sapiens GN=SCARB1 PE=1 SV=1	SCRB1_HUMAN	61 kDa	1.9148	0	0.93809	0.950963	0	0	0	0.1	9.50963	3.24939	0.160496	0.794537
Golgi reassembly-stacking protein 2 OS=Homo sapiens GN=GORASP2 PE=1 SV=3	GORS2_HUMAN	47 kDa	1.9148	0	0.93809	0.950963	0	0	0	0.1	9.50963	3.24939	0.160496	0.794537
Splicing factor 3A subunit 2 OS=Homo sapiens GN=SF3A2 PE=1 SV=2	SF3A2_HUMAN	49 kDa	1.9148	0	0.93809	0.950963	0	0	0	0.1	9.50963	3.24939	0.160496	0.794537
Procollagen-lysine,2-oxoglutarate 5-dioxygenase 3 OS=Homo sapiens GN=PLOD3 PE=1 SV=1	PLOD3_HUMAN	85 kDa	1.9148	0.94875	0	0.954517	0	0	0	0.1	9.54517	3.25477	0.159276	0.797851
Pleiotropic regulator 1 OS=Homo sapiens GN=PLRG1 PE=1 SV=1	PLRG1_HUMAN	57 kDa	2.8722	0	0	0.9574	0	0	0	0.1	9.574	3.25912	0.373901	0.427243
Uncharacterized protein C19orf43 OS=Homo sapiens GN=C19orf43 PE=1 SV=1	CS043_HUMAN	18 kDa	3.8296	2.8462	3.7524	3.47607	0	0	1.0397	0.346567	10.03	3.32625	0.00261773	2.58207
Clustered mitochondria protein homolog OS=Homo sapiens GN=KIAA0664 PE=1 SV=2	CLU_HUMAN	147 kDa	5.7444	1.8975	3.7524	3.7981	0	1.1269	0	0.375633	10.1112	3.33788	0.0432929	1.36358
Serine-threonine kinase receptor-associated protein OS=Homo sapiens GN=STRAP PE=1 SV=1	STRAP_HUMAN	38 kDa	3.8296	3.795	3.7524	3.79233	0	0	1.0397	0.346567	10.9426	3.45188	0.000579295	3.2371
Signal transducing adapter molecule 1 OS=Homo sapiens GN=STAM PE=1 SV=3	STAM1_HUMAN	59 kDa	1.9148	5.6925	3.7524	3.78657	1.0296	0	0	0.3432	11.0331	3.46377	0.0394899	1.40351
5'-3' exoribonuclease 2 OS=Homo sapiens GN=XRN2 PE=1 SV=1	XRN2_HUMAN	109 kDa	5.7444	2.8462	2.8143	3.80163	1.0296	0	0	0.3432	11.077	3.4695	0.0283884	1.54686
Golgi apparatus protein 1 OS=Homo sapiens GN=GLG1 PE=1 SV=2	GSLG1_HUMAN	135 kDa	3.8296	3.795	4.6905	4.10503	1.0296	0	0	0.3432	11.9611	3.58027	0.00113103	2.94653
HLA class II histocompatibility antigen gamma chain OS=Homo sapiens GN=CD74 PE=1 SV=3	HG2A_HUMAN	34 kDa	0.9574	0	2.8143	1.25723	0	0	0	0.1	12.5723	3.65218	0.202706	0.693134
Dynamin-3 OS=Homo sapiens GN=DNM3 PE=1 SV=4	DYN3_HUMAN	98 kDa	0.9574	0	2.8143	1.25723	0	0	0	0.1	12.5723	3.65218	0.202706	0.693134
Dihydropteridine reductase OS=Homo sapiens GN=QDPR PE=1 SV=2	DHPR_HUMAN	26 kDa	0.9574	0.94875	1.8762	1.26078	0	0	0	0.1	12.6078	3.65625	0.0148871	1.82719
Serine/threonine-protein phosphatase 6 regulatory subunit 3 OS=Homo sapiens GN=PPP6R3 PE=1 SV=2	PP6R3_HUMAN	98 kDa	0.9574	0.94875	1.8762	1.26078	0	0	0	0.1	12.6078	3.65625	0.0148871	1.82719
Polymerase delta-interacting protein 2 OS=Homo sapiens GN=POLDIP2 PE=1 SV=1	PDIP2_HUMAN	42 kDa	0.9574	0.94875	1.8762	1.26078	0	0	0	0.1	12.6078	3.65625	0.0148871	1.82719
CCAAT/enhancer-binding protein zeta OS=Homo sapiens GN=CEBPZ PE=1 SV=3	CEBPZ_HUMAN	121 kDa	1.9148	0	1.8762	1.26367	0	0	0	0.1	12.6367	3.65954	0.116158	0.934952
Mitochondrial import inner membrane translocase subunit TIM50 OS=Homo sapiens GN=TIMM50 PE=1 SV=2	TIM50_HUMAN	40 kDa	1.9148	0	1.8762	1.26367	0	0	0	0.1	12.6367	3.65954	0.116158	0.934952
Protein SCO1 homolog, mitochondrial OS=Homo sapiens GN=SCO1 PE=1 SV=1	SCO1_HUMAN	34 kDa	1.9148	0	1.8762	1.26367	0	0	0	0.1	12.6367	3.65954	0.116158	0.934952
Beta-1-syntrophin OS=Homo sapiens GN=SNTB1 PE=1 SV=3	SNTB1_HUMAN	58 kDa	0.9574	1.8975	0.93809	1.26433	0	0	0	0.1	12.6433	3.6603	0.0162239	1.78984
Proteasome activator complex subunit 3 OS=Homo sapiens GN=PSME3 PE=1 SV=1	PSME3_HUMAN	30 kDa	7.6592	2.8462	3.7524	4.7526	0	1.1269	0	0.375633	12.6522	3.66132	0.0453488	1.34343
ATP-dependent RNA helicase DDX42 OS=Homo sapiens GN=DDX42 PE=1 SV=1	DDX42_HUMAN	103 kDa	1.9148	0.94875	0.93809	1.26721	0	0	0	0.1	12.6721	3.66359	0.0173429	1.76088
28S ribosomal protein S7, mitochondrial OS=Homo sapiens GN=MRPS7 PE=1 SV=2	RT07_HUMAN	28 kDa	1.9148	1.8975	0	1.27077	0	0	0	0.1	12.7077	3.66763	0.116125	0.935075
LIM domain only protein 7 OS=Homo sapiens GN=LMO7 PE=1 SV=3	LMO7_HUMAN	193 kDa	1.9148	1.8975	0	1.27077	0	0	0	0.1	12.7077	3.66763	0.116125	0.935075
Protein DEK OS=Homo sapiens GN=DEK PE=1 SV=1	DEK_HUMAN	43 kDa	3.8296	4.7437	4.6905	4.42127	1.0296	0	0	0.3432	12.8825	3.68734	0.000845595	3.07284
Lysosomal protective protein OS=Homo sapiens GN=CTSA PE=1 SV=2	PPGB_HUMAN	54 kDa	8.6166	8.5387	10.319	9.1581	1.0296	0	1.0397	0.689767	13.2771	3.73087	0.000233029	3.63259
Cluster of Dynamin-2 OS=Homo sapiens GN=DNM2 PE=1 SV=2 (DYN2_HUMAN)	DYN2_HUMAN	98 kDa	5.7444	3.795	5.6286	5.056	1.0296	0	0	0.3432	14.7319	3.88088	0.00279623	2.55343
1,2-dihydroxy-3-keto-5-methylthiopentene dioxygenase OS=Homo sapiens GN=ADI1 PE=1 SV=1	MTND_HUMAN	21 kDa	5.7444	5.6925	5.6286	5.6885	0	1.1269	0	0.375633	15.1438	3.92065	0.00014734	3.83168
ATP-binding cassette sub-family F member 1 OS=Homo sapiens GN=ABCF1 PE=1 SV=2	ABCF1_HUMAN	96 kDa	1.9148	0	2.8143	1.57637	0	0	0	0.1	15.7637	3.97853	0.130303	0.885044
Cytoplasmic aconitate hydratase OS=Homo sapiens GN=ACO1 PE=1 SV=3	ACOC_HUMAN	98 kDa	0.9574	1.8975	1.8762	1.57703	0	0	0	0.1	15.7703	3.97914	0.00703532	2.15272
Tetratricopeptide repeat protein 38 OS=Homo sapiens GN=TTC38 PE=1 SV=1	TTC38_HUMAN	53 kDa	0.9574	1.8975	1.8762	1.57703	0	0	0	0.1	15.7703	3.97914	0.00703532	2.15272
Syntaxin-binding protein 2 OS=Homo sapiens GN=STXBP2 PE=1 SV=2	STXB2_HUMAN	66 kDa	1.9148	0.94875	1.8762	1.57992	0	0	0	0.1	15.7992	3.98178	0.0074734	2.12648
Uracil-DNA glycosylase OS=Homo sapiens GN=UNG PE=1 SV=2	UNG_HUMAN	35 kDa	1.9148	0.94875	1.8762	1.57992	0	0	0	0.1	15.7992	3.98178	0.0074734	2.12648
DNA-directed RNA polymerase II subunit RPB2 OS=Homo sapiens GN=POLR2B PE=1 SV=1	RPB2_HUMAN	134 kDa	2.8722	0	1.8762	1.5828	0	0	0	0.1	15.828	3.98441	0.133314	0.875124
Ubiquitin-fold modifier-conjugating enzyme 1 OS=Homo sapiens GN=UFC1 PE=1 SV=3	UFC1_HUMAN	19 kDa	2.8722	0	1.8762	1.5828	0	0	0	0.1	15.828	3.98441	0.133314	0.875124
Ribonucleases P/MRP protein subunit POP1 OS=Homo sapiens GN=POP1 PE=1 SV=2	POP1_HUMAN	115 kDa	1.9148	1.8975	0.93809	1.58346	0	0	0	0.1	15.8346	3.98501	0.00800632	2.09657
Probable ATP-dependent RNA helicase DDX46 OS=Homo sapiens GN=DDX46 PE=1 SV=2	DDX46_HUMAN	117 kDa	1.9148	1.8975	0.93809	1.58346	0	0	0	0.1	15.8346	3.98501	0.00800632	2.09657
Prefoldin subunit 5 OS=Homo sapiens GN=PFDN5 PE=1 SV=2	PFD5_HUMAN	17 kDa	0.9574	3.795	0	1.58413	0	0	0	0.1	15.8413	3.98562	0.236814	0.625592
U6 snRNA-associated Sm-like protein LSm4 OS=Homo sapiens GN=LSM4 PE=1 SV=1	LSM4_HUMAN	15 kDa	1.9148	2.8462	0	1.587	0	0	0	0.1	15.87	3.98823	0.131111	0.882359
Oxysterol-binding protein 1 OS=Homo sapiens GN=OSBP PE=1 SV=1	OSBP1_HUMAN	89 kDa	1.9148	2.8462	0	1.587	0	0	0	0.1	15.87	3.98823	0.131111	0.882359
CD2-associated protein OS=Homo sapiens GN=CD2AP PE=1 SV=1	CD2AP_HUMAN	71 kDa	0.9574	1.8975	2.8143	1.88973	0	0	0	0.1	18.8973	4.24011	0.0243343	1.61378
WD repeat-containing protein 43 OS=Homo sapiens GN=WDR43 PE=1 SV=3	WDR43_HUMAN	75 kDa	0.9574	1.8975	2.8143	1.88973	0	0	0	0.1	18.8973	4.24011	0.0243343	1.61378
Eukaryotic translation initiation factor 2A OS=Homo sapiens GN=EIF2A PE=1 SV=3	EIF2A_HUMAN	65 kDa	1.9148	0.94875	2.8143	1.89262	0	0	0	0.1	18.9262	4.24231	0.0245914	1.60922
Ataxin-2-like protein OS=Homo sapiens GN=ATXN2L PE=1 SV=2	ATX2L_HUMAN	113 kDa	0.9574	2.8462	1.8762	1.89327	0	0	0	0.1	18.9327	4.24281	0.0255401	1.59278
Pinin OS=Homo sapiens GN=PNN PE=1 SV=4	PININ_HUMAN	82 kDa	1.9148	1.8975	1.8762	1.89617	0	0	0	0.1	18.9617	4.24501	7.20502e-09	8.14236
Prolyl 4-hydroxylase subunit alpha-2 OS=Homo sapiens GN=P4HA2 PE=1 SV=1	P4HA2_HUMAN	61 kDa	1.9148	1.8975	1.8762	1.89617	0	0	0	0.1	18.9617	4.24501	7.20502e-09	8.14236
Epidermal growth factor receptor kinase substrate 8-like protein 2 OS=Homo sapiens GN=EPS8L2 PE=1 SV=2	ES8L2_HUMAN	81 kDa	1.9148	1.8975	1.8762	1.89617	0	0	0	0.1	18.9617	4.24501	7.20502e-09	8.14236
THO complex subunit 5 homolog OS=Homo sapiens GN=THOC5 PE=1 SV=2	THOC5_HUMAN	79 kDa	1.9148	1.8975	1.8762	1.89617	0	0	0	0.1	18.9617	4.24501	7.20502e-09	8.14236
Histone acetyltransferase type B catalytic subunit OS=Homo sapiens GN=HAT1 PE=1 SV=1	HAT1_HUMAN	50 kDa	1.9148	1.8975	1.8762	1.89617	0	0	0	0.1	18.9617	4.24501	7.20502e-09	8.14236
Asialoglycoprotein receptor 2 OS=Homo sapiens GN=ASGR2 PE=1 SV=2	ASGR2_HUMAN	35 kDa	8.6166	4.7437	6.5666	6.6423	1.0296	0	0	0.3432	19.354	4.27456	0.00575584	2.23989
AP-2 complex subunit alpha-1 OS=Homo sapiens GN=AP2A1 PE=1 SV=3	AP2A1_HUMAN	108 kDa	0	1.8975	4.6905	2.196	0	0	0	0.1	21.96	4.45681	0.182242	0.739351
UDP-glucuronosyltransferase 2A3 OS=Homo sapiens GN=UGT2A3 PE=2 SV=2	UD2A3_HUMAN	60 kDa	1.9148	1.8975	2.8143	2.20887	0	0	0	0.1	22.0887	4.46523	0.00187642	2.72667
28S ribosomal protein S34, mitochondrial OS=Homo sapiens GN=MRPS34 PE=1 SV=2	RT34_HUMAN	26 kDa	1.9148	1.8975	2.8143	2.20887	0	0	0	0.1	22.0887	4.46523	0.00187642	2.72667
Endothelin-converting enzyme 1 OS=Homo sapiens GN=ECE1 PE=1 SV=2	ECE1_HUMAN	87 kDa	1.9148	1.8975	2.8143	2.20887	0	0	0	0.1	22.0887	4.46523	0.00187642	2.72667
PHD finger-like domain-containing protein 5A OS=Homo sapiens GN=PHF5A PE=1 SV=1	PHF5A_HUMAN	12 kDa	1.9148	1.8975	2.8143	2.20887	0	0	0	0.1	22.0887	4.46523	0.00187642	2.72667
2',3'-cyclic-nucleotide 3'-phosphodiesterase OS=Homo sapiens GN=CNP PE=1 SV=2	CN37_HUMAN	48 kDa	0.9574	3.795	1.8762	2.20953	0	0	0	0.1	22.0953	4.46567	0.0573874	1.24118
Vinexin OS=Homo sapiens GN=SORBS3 PE=1 SV=2	VINEX_HUMAN	75 kDa	1.9148	2.8462	1.8762	2.2124	0	0	0	0.1	22.124	4.46754	0.00221925	2.65379
Protein 4.1 OS=Homo sapiens GN=EPB41 PE=1 SV=4	41_HUMAN	97 kDa	2.8722	1.8975	1.8762	2.2153	0	0	0	0.1	22.153	4.46943	0.00252042	2.59853
Dynactin subunit 1 OS=Homo sapiens GN=DCTN1 PE=1 SV=3	DCTN1_HUMAN	142 kDa	2.8722	1.8975	1.8762	2.2153	0	0	0	0.1	22.153	4.46943	0.00252042	2.59853
Dystroglycan OS=Homo sapiens GN=DAG1 PE=1 SV=2	DAG1_HUMAN	97 kDa	3.8296	0.94875	1.8762	2.21818	0	0	0	0.1	22.1818	4.47131	0.0592567	1.22726
Procollagen-lysine,2-oxoglutarate 5-dioxygenase 1 OS=Homo sapiens GN=PLOD1 PE=1 SV=2	PLOD1_HUMAN	84 kDa	3.8296	1.8975	0.93809	2.22173	0	0	0	0.1	22.2173	4.47361	0.0592414	1.22737
Alpha-fetoprotein OS=Homo sapiens GN=AFP PE=1 SV=1	FETA_HUMAN	69 kDa	2.8722	0	4.6905	2.5209	0	0	0	0.1	25.209	4.65587	0.138582	0.858294
Ubiquitin-associated protein 2-like OS=Homo sapiens GN=UBAP2L PE=1 SV=2	UBP2L_HUMAN	115 kDa	1.9148	1.8975	3.7524	2.52157	0	0	0	0.1	25.2157	4.65625	0.0148871	1.82719
Protein MEMO1 OS=Homo sapiens GN=MEMO1 PE=1 SV=1	MEMO1_HUMAN	34 kDa	1.9148	2.8462	2.8143	2.5251	0	0	0	0.1	25.251	4.65827	0.00116601	2.9333
rRNA/tRNA 2'-O-methyltransferase fibrillarin-like protein 1 OS=Homo sapiens GN=FBLL1 PE=3 SV=1	FBLL1_HUMAN	35 kDa	3.8296	0	3.7524	2.52733	0	0	0	0.1	25.2733	4.65954	0.116158	0.934952
Sister chromatid cohesion protein PDS5 homolog A OS=Homo sapiens GN=PDS5A PE=1 SV=1	PDS5A_HUMAN	151 kDa	2.8722	1.8975	2.8143	2.528	0	0	0	0.1	25.28	4.65992	0.00131901	2.87975
Copper transport protein ATOX1 OS=Homo sapiens GN=ATOX1 PE=1 SV=1	ATOX1_HUMAN	7 kDa	2.8722	2.8462	2.8143	2.84423	0	0	0	0.1	28.4423	4.82997	7.20349e-09	8.14246
Tight junction protein ZO-2 OS=Homo sapiens GN=TJP2 PE=1 SV=2	ZO2_HUMAN	134 kDa	2.8722	2.8462	2.8143	2.84423	0	0	0	0.1	28.4423	4.82997	7.20349e-09	8.14246
Paternally-expressed gene 3 protein OS=Homo sapiens GN=PEG3 PE=2 SV=1	PEG3_HUMAN	181 kDa	2.8722	2.8462	2.8143	2.84423	0	0	0	0.1	28.4423	4.82997	7.20349e-09	8.14246
Coronin-1B OS=Homo sapiens GN=CORO1B PE=1 SV=1	COR1B_HUMAN	54 kDa	3.8296	1.8975	2.8143	2.84713	0	0	0	0.1	28.4713	4.83144	0.00697058	2.15673
SUMO-conjugating enzyme UBC9 OS=Homo sapiens GN=UBE2I PE=1 SV=1	UBC9_HUMAN	18 kDa	5.7444	0.94875	1.8762	2.85645	0	0	0	0.1	28.5645	4.83615	0.12366	0.90777
Integrin-linked protein kinase OS=Homo sapiens GN=ILK PE=1 SV=2	ILK_HUMAN	51 kDa	1.9148	2.8462	4.6905	3.1505	0	0	0	0.1	31.505	4.97751	0.0181035	1.74224
Basic leucine zipper and W2 domain-containing protein 2 OS=Homo sapiens GN=BZW2 PE=1 SV=1	BZW2_HUMAN	48 kDa	3.8296	1.8975	3.7524	3.15983	0	0	0	0.1	31.5983	4.98178	0.0074734	2.12648
Procollagen-lysine,2-oxoglutarate 5-dioxygenase 2 OS=Homo sapiens GN=PLOD2 PE=1 SV=2	PLOD2_HUMAN	85 kDa	3.8296	1.8975	3.7524	3.15983	0	0	0	0.1	31.5983	4.98178	0.0074734	2.12648
Ribonucleoside-diphosphate reductase large subunit OS=Homo sapiens GN=RRM1 PE=1 SV=1	RIR1_HUMAN	90 kDa	3.8296	2.8462	2.8143	3.16337	0	0	0	0.1	31.6337	4.98339	0.000687283	3.16286
Ornithine aminotransferase, mitochondrial OS=Homo sapiens GN=OAT PE=1 SV=1	OAT_HUMAN	49 kDa	3.8296	2.8462	2.8143	3.16337	0	0	0	0.1	31.6337	4.98339	0.000687283	3.16286
Myosin-14 OS=Homo sapiens GN=MYH14 PE=1 SV=2	MYH14_HUMAN	228 kDa	0	3.795	6.5666	3.45387	0	0	0	0.1	34.5387	5.11014	0.14376	0.842362
Cluster of Ubiquilin-2 OS=Homo sapiens GN=UBQLN2 PE=1 SV=2 (UBQL2_HUMAN)	UBQL2_HUMAN [2]	66 kDa	2.8722	3.795	3.7524	3.4732	0	0	0	0.1	34.732	5.11819	0.000321115	3.49334
Endophilin-A2 OS=Homo sapiens GN=SH3GL1 PE=1 SV=1	SH3G1_HUMAN	41 kDa	2.8722	3.795	3.7524	3.4732	0	0	0	0.1	34.732	5.11819	0.000321115	3.49334
Lysosomal acid lipase/cholesteryl ester hydrolase OS=Homo sapiens GN=LIPA PE=1 SV=2	LICH_HUMAN	45 kDa	3.8296	2.8462	3.7524	3.47607	0	0	0	0.1	34.7607	5.11938	0.000386809	3.4125
Cell adhesion molecule 1 OS=Homo sapiens GN=CADM1 PE=1 SV=2	CADM1_HUMAN	49 kDa	3.8296	2.8462	3.7524	3.47607	0	0	0	0.1	34.7607	5.11938	0.000386809	3.4125
Serotransferrin OS=Homo sapiens GN=TF PE=1 SV=3	TRFE_HUMAN	175 kDa	44.041	54.079	48.781	48.967	2.0593	1.1269	1.0397	1.40863	34.7621	5.11944	8.28857e-05	4.08152
39S ribosomal protein L15, mitochondrial OS=Homo sapiens GN=MRPL15 PE=1 SV=1	RM15_HUMAN	33 kDa	5.7444	2.8462	1.8762	3.48893	0	0	0	0.1	34.8893	5.12471	0.0398404	1.39968
Heme oxygenase 2 OS=Homo sapiens GN=HMOX2 PE=1 SV=2	HMOX2_HUMAN	36 kDa	3.8296	3.795	3.7524	3.79233	0	0	0	0.1	37.9233	5.24501	7.20502e-09	8.14236
SAM domain and HD domain-containing protein 1 OS=Homo sapiens GN=SAMHD1 PE=1 SV=2	SAMH1_HUMAN	72 kDa	3.8296	3.795	3.7524	3.79233	0	0	0	0.1	37.9233	5.24501	7.20502e-09	8.14236
Coproporphyrinogen-III oxidase, mitochondrial OS=Homo sapiens GN=CPOX PE=1 SV=3	HEM6_HUMAN	50 kDa	5.7444	2.8462	2.8143	3.80163	0	0	0	0.1	38.0163	5.24855	0.0173432	1.76087
Complement C3 OS=Homo sapiens GN=C3 PE=1 SV=2	CO3_HUMAN	187 kDa	14.361	12.334	15.009	13.9013	1.0296	0	0	0.3432	40.5051	5.34003	0.000101592	3.99314
Uroporphyrinogen decarboxylase OS=Homo sapiens GN=UROD PE=1 SV=2	DCUP_HUMAN	41 kDa	5.7444	1.8975	4.6905	4.1108	0	0	0	0.1	41.108	5.36135	0.0231315	1.6358
Procollagen galactosyltransferase 1 OS=Homo sapiens GN=GLT25D1 PE=1 SV=1	GT251_HUMAN	72 kDa	5.7444	2.8462	4.6905	4.42703	0	0	0	0.1	44.2703	5.46827	0.00639654	2.19406
Double-stranded RNA-binding protein Staufen homolog 1 OS=Homo sapiens GN=STAU1 PE=1 SV=2	STAU1_HUMAN	63 kDa	0.9574	7.59	7.5047	5.3507	0	0	0	0.1	53.507	5.74166	0.07154	1.14545
Prolyl 4-hydroxylase subunit alpha-1 OS=Homo sapiens GN=P4HA1 PE=1 SV=2	P4HA1_HUMAN	61 kDa	6.7018	6.6412	4.6905	6.01117	0	0	0	0.1	60.1117	5.90957	0.000808724	3.0922
SUN domain-containing protein 2 OS=Homo sapiens GN=SUN2 PE=1 SV=3	SUN2_HUMAN	80 kDa	7.6592	4.7437	7.5047	6.63587	0	0	0	0.1	66.3587	6.05221	0.0021848	2.66059
Cluster of Metallothionein-2 OS=Homo sapiens GN=MT2A PE=1 SV=1 (MT2_HUMAN)	MT2_HUMAN [2]	6 kDa	6.7018	9.4875	5.6286	7.27263	0	0	0	0.1	72.7263	6.18441	0.00319869	2.49503
Glypican-3 OS=Homo sapiens GN=GPC3 PE=1 SV=1	GPC3_HUMAN	66 kDa	11.489	6.6412	7.5047	8.54497	0	0	0	0.1	85.4497	6.417	0.00461239	2.33607
Phenylalanine-4-hydroxylase OS=Homo sapiens GN=PAH PE=1 SV=1	PH4H_HUMAN	52 kDa	9.574	6.6412	11.257	9.1574	0	0	0	0.1	91.574	6.51687	0.00245659	2.60967
General transcription factor II-I OS=Homo sapiens GN=GTF2I PE=1 SV=2	GTF2I_HUMAN	112 kDa	9.574	7.59	13.133	10.099	0	0	0	0.1	100.99	6.65807	0.00338483	2.47046
Creatine kinase B-type OS=Homo sapiens GN=CKB PE=1 SV=1	KCRB_HUMAN	43 kDa	13.404	7.59	17.824	12.9393	0	0	0	0.1	129.393	7.01562	0.0120023	1.92073
Protein NDRG1 OS=Homo sapiens GN=NDRG1 PE=1 SV=1	NDRG1_HUMAN	43 kDa	15.318	16.129	23.452	18.2997	0	0	0	0.1	182.997	7.51567	0.00210703	2.67633
Serum albumin OS=Homo sapiens GN=ALB PE=1 SV=2	ALBU_HUMAN	69 kDa	35.424	31.309	29.081	31.938	0	0	0	0.1	319.38	8.31913	6.71824e-05	4.17274

## Sheet: B. Citrate cycle
Identified Proteins	Accession Number	Molecular Weight	HC-04 CM B01	HC-04 CM B02	HC-04 CM B03	HC-04 CM avg.	HC-04 basic B01	HC-04 basic B02	HC-04 basic B03	HC-04 basic avg.	CM/basic	log2(CM/basic)	p-value	log10(p-value)
2-oxoglutarate dehydrogenase, mitochondrial OS=Homo sapiens GN=OGDH PE=1 SV=3	ODO1_HUMAN	116 kDa	0	0.94875	0.93809	0.628947	3.0889	3.3808	2.0794	2.8497	0.220706	-2.1798	0.0116602	1.9333
Cluster of Phosphoenolpyruvate carboxykinase [GTP], mitochondrial OS=Homo sapiens GN=PCK2 PE=1 SV=3 (PCKGM_HUMAN)	PCKGM_HUMAN	71 kDa	3.8296	4.7437	9.3809	5.98473	28.83	24.793	29.112	27.5783	0.217009	-2.20418	0.000618427	3.20871
Succinyl-CoA ligase [GDP-forming] subunit beta, mitochondrial OS=Homo sapiens GN=SUCLG2 PE=1 SV=2	SUCB2_HUMAN	47 kDa	0.9574	0.94875	0	0.635383	7.2075	3.3808	9.3574	6.64857	0.095567	-3.38734	0.0276575	1.55819
Succinate dehydrogenase cytochrome b560 subunit, mitochondrial OS=Homo sapiens GN=SDHC PE=1 SV=1	C560_HUMAN	19 kDa	0	0	0	0.1	4.1186	2.2539	1.0397	2.47073	0.0404738	-4.62687	0.0508812	1.29344
Succinyl-CoA ligase [ADP/GDP-forming] subunit alpha, mitochondrial OS=Homo sapiens GN=SUCLG1 PE=1 SV=4	SUCA_HUMAN	36 kDa	0	0.94875	0.93809	0.628947	3.0889	2.2539	3.1191	2.82063	0.222981	-2.16501	0.00662326	2.17893
ATP-citrate synthase OS=Homo sapiens GN=ACLY PE=1 SV=3	ACLY_HUMAN	121 kDa	21.063	18.026	15.948	18.3457	16.474	12.396	12.477	13.7823	1.3311	0.412619	0.0851	1.07007
Cytoplasmic aconitate hydratase OS=Homo sapiens GN=ACO1 PE=1 SV=3	ACOC_HUMAN	98 kDa	0.9574	1.8975	1.8762	1.57703	0	0	0	0.1	15.7703	3.97914	0.00703532	2.15272
Aconitate hydratase, mitochondrial OS=Homo sapiens GN=ACO2 PE=1 SV=2	ACON_HUMAN	85 kDa	11.489	7.59	6.5666	8.54853	17.504	14.65	15.596	15.9167	0.537081	-0.896789	0.0127718	1.89375
Citrate synthase, mitochondrial OS=Homo sapiens GN=CS PE=1 SV=2	CISY_HUMAN	52 kDa	38.296	25.616	34.709	32.8737	33.978	31.554	40.549	35.3603	0.929676	-0.105199	0.619886	0.207688
Dihydrolipoyllysine-residue acetyltransferase component of pyruvate dehydrogenase complex, mitochondrial OS=Homo sapiens GN=DLAT PE=1 SV=3	ODP2_HUMAN	69 kDa	2.8722	2.8462	1.8762	2.53153	5.1482	3.3808	3.1191	3.8827	0.652003	-0.617049	0.132429	0.878016
Dihydrolipoyllysine-residue succinyltransferase component of 2-oxoglutarate dehydrogenase complex, mitochondrial OS=Homo sapiens GN=DLST PE=1 SV=4	ODO2_HUMAN	49 kDa	2.8722	3.795	1.8762	2.8478	6.1779	4.5078	4.1588	4.94817	0.575526	-0.797046	0.0654185	1.1843
Dihydrolipoyl dehydrogenase, mitochondrial OS=Homo sapiens GN=DLD PE=1 SV=2	DLDH_HUMAN	54 kDa	22.02	14.231	16.886	17.7123	18.534	18.031	21.834	19.4663	0.909896	-0.136227	0.533695	0.272706
Fumarate hydratase, mitochondrial OS=Homo sapiens GN=FH PE=1 SV=3	FUMH_HUMAN	55 kDa	3.8296	3.795	7.5047	5.0431	9.2668	5.6347	1.0397	5.31373	0.949069	-0.075415	0.924417	0.0341321
Isocitrate dehydrogenase [NADP] cytoplasmic OS=Homo sapiens GN=IDH1 PE=1 SV=2	IDHC_HUMAN	47 kDa	48.828	61.669	51.595	54.0307	82.372	89.028	85.256	85.552	0.631554	-0.663023	0.0019281	2.71487
Isocitrate dehydrogenase [NADP], mitochondrial OS=Homo sapiens GN=IDH2 PE=1 SV=2	IDHP_HUMAN	51 kDa	28.722	33.206	31.895	31.2743	44.275	34.935	42.628	40.6127	0.770064	-0.376951	0.042192	1.37477
Isocitrate dehydrogenase [NAD] subunit alpha, mitochondrial OS=Homo sapiens GN=IDH3A PE=1 SV=1	IDH3A_HUMAN	40 kDa	1.9148	0.94875	1.8762	1.57992	5.1482	2.2539	2.0794	3.1605	0.499895	-1.0003	0.204605	0.689083
Malate dehydrogenase, cytoplasmic OS=Homo sapiens GN=MDH1 PE=1 SV=4	MDHC_HUMAN	36 kDa	29.679	31.309	27.205	29.3977	20.593	22.539	21.834	21.6553	1.35753	0.440979	0.00423849	2.37279
Pyruvate carboxylase, mitochondrial OS=Homo sapiens GN=PC PE=1 SV=2	PYC_HUMAN	130 kDa	13.404	12.334	14.071	13.2697	10.296	14.65	14.556	13.1673	1.00777	0.0111689	0.949635	0.0224434
Pyruvate dehydrogenase E1 component subunit alpha, somatic form, mitochondrial OS=Homo sapiens GN=PDHA1 PE=1 SV=3	ODPA_HUMAN	43 kDa	2.8722	2.8462	0.93809	2.21883	5.1482	4.5078	3.1191	4.25837	0.521052	-0.940501	0.0805959	1.09369
Pyruvate dehydrogenase E1 component subunit beta, mitochondrial OS=Homo sapiens GN=PDHB PE=1 SV=3	ODPB_HUMAN	39 kDa	1.9148	3.795	3.7524	3.15407	7.2075	7.8886	5.1986	6.7649	0.46624	-1.10086	0.0238541	1.62244
Succinate dehydrogenase [ubiquinone] flavoprotein subunit, mitochondrial OS=Homo sapiens GN=SDHA PE=1 SV=2	DHSA_HUMAN	73 kDa	8.6166	5.6925	9.3809	7.89667	7.2075	6.7616	6.2383	6.7358	1.17234	0.229394	0.372959	0.428339
Succinate dehydrogenase [ubiquinone] iron-sulfur subunit, mitochondrial OS=Homo sapiens GN=SDHB PE=1 SV=3	DHSB_HUMAN	32 kDa	1.9148	0	0.93809	0.950963	0	0	3.1191	1.0397	0.914652	-0.128706	0.943548	0.0252362

## Sheet: C. Oxidative phosphorylation
Identified Proteins	Accession Number	Molecular Weight	HC-04 CM B01	HC-04 CM B02	HC-04 CM B03	HC-04 CM avg.	HC-04 basic B01	HC-04 basic B02	HC-04 basic B03	HC-04 basic avg.	CM/basic	log2(CM/basic)	p-value	log10(p-value)
ATP synthase subunit b, mitochondrial OS=Homo sapiens GN=ATP5F1 PE=1 SV=2	AT5F1_HUMAN	29 kDa	8.6166	7.59	12.195	9.4672	16.474	13.523	17.675	15.8907	0.595771	-0.74717	0.0260916	1.5835
ATP synthase subunit e, mitochondrial OS=Homo sapiens GN=ATP5I PE=1 SV=2	ATP5I_HUMAN	8 kDa	3.8296	1.8975	1.8762	2.53443	5.1482	2.2539	1.0397	2.81393	0.900673	-0.150925	0.849384	0.0708957
ATP synthase subunit f, mitochondrial OS=Homo sapiens GN=ATP5J2 PE=1 SV=3	ATPK_HUMAN	11 kDa	1.9148	0	1.8762	1.26367	6.1779	14.65	8.3177	9.7152	0.130071	-2.94263	0.0321366	1.493
ATP synthase-coupling factor 6, mitochondrial OS=Homo sapiens GN=ATP5J PE=1 SV=1	ATP5J_HUMAN	13 kDa	5.7444	3.795	3.7524	4.4306	4.1186	2.2539	2.0794	2.8173	1.57264	0.653189	0.156445	0.805639
ATP synthase subunit g, mitochondrial OS=Homo sapiens GN=ATP5L PE=1 SV=3	ATP5L_HUMAN	11 kDa	4.787	3.795	3.7524	4.11147	6.1779	4.5078	6.2383	5.64133	0.728811	-0.456383	0.0813561	1.08961
ATP synthase subunit d, mitochondrial OS=Homo sapiens GN=ATP5H PE=1 SV=3	ATP5H_HUMAN	18 kDa	14.361	15.18	15.009	14.85	17.504	18.031	23.913	19.816	0.749394	-0.416203	0.0743623	1.12865
ATP synthase subunit O, mitochondrial OS=Homo sapiens GN=ATP5O PE=1 SV=1	ATPO_HUMAN	23 kDa	16.276	14.231	13.133	14.5467	14.415	16.904	19.755	17.0247	0.854446	-0.226938	0.239925	0.619925
26S proteasome non-ATPase regulatory subunit 1 OS=Homo sapiens GN=PSMD1 PE=1 SV=2	PSMD1_HUMAN	106 kDa	12.446	9.4875	9.3809	10.4381	12.356	11.269	12.477	12.034	0.867387	-0.205253	0.211956	0.673755
ATP synthase subunit beta, mitochondrial OS=Homo sapiens GN=ATP5B PE=1 SV=3	ATPB_HUMAN	57 kDa	165.63	172.67	157.6	165.3	254.32	255.81	276.56	262.23	0.630363	-0.665746	0.000321348	3.49302
ATP synthase subunit gamma, mitochondrial OS=Homo sapiens GN=ATP5C1 PE=1 SV=1	ATPG_HUMAN	33 kDa	7.6592	3.795	4.6905	5.38157	7.2075	12.396	12.477	10.6935	0.503256	-0.990636	0.0645481	1.19012
V-type proton ATPase subunit E 1 OS=Homo sapiens GN=ATP6V1E1 PE=1 SV=1	VATE1_HUMAN	26 kDa	3.8296	5.6925	3.7524	4.42483	2.0593	2.2539	3.1191	2.47743	1.78606	0.836777	0.0523685	1.28093
V-type proton ATPase subunit H OS=Homo sapiens GN=ATP6V1H PE=1 SV=1	VATH_HUMAN	56 kDa	0	0.94875	0	0.31625	3.0889	2.2539	2.0794	2.47407	0.127826	-2.96775	0.00827375	2.0823
Cluster of V-type proton ATPase subunit B, brain isoform OS=Homo sapiens GN=ATP6V1B2 PE=1 SV=3 (VATB2_HUMAN)	VATB2_HUMAN [2]	57 kDa	5.7444	6.6412	5.6286	6.00473	3.0889	4.5078	3.1191	3.57193	1.68109	0.749395	0.0127354	1.89499
V-type proton ATPase catalytic subunit A OS=Homo sapiens GN=ATP6V1A PE=1 SV=2	VATA_HUMAN	68 kDa	9.574	10.436	7.5047	9.17157	5.1482	11.269	2.0794	6.16553	1.48755	0.572942	0.349186	0.456944
Cytochrome c oxidase subunit 1 OS=Homo sapiens GN=MT-CO1 PE=1 SV=1	COX1_HUMAN	57 kDa	0	0	4.6905	1.5635	15.445	10.142	8.3177	11.3016	0.138344	-2.85367	0.0212599	1.67244
Cytochrome c oxidase subunit 2 OS=Homo sapiens GN=MT-CO2 PE=1 SV=1	COX2_HUMAN	26 kDa	13.404	10.436	10.319	11.3863	12.356	15.777	17.675	15.2693	0.745699	-0.423334	0.104443	0.981121
NADH dehydrogenase [ubiquinone] 1 alpha subcomplex subunit 10, mitochondrial OS=Homo sapiens GN=NDUFA10 PE=1 SV=1	NDUAA_HUMAN	41 kDa	2.8722	1.8975	4.6905	3.1534	2.0593	2.2539	2.0794	2.13087	1.47987	0.565468	0.280815	0.55158
NADH dehydrogenase [ubiquinone] 1 alpha subcomplex subunit 5 OS=Homo sapiens GN=NDUFA5 PE=1 SV=3	NDUA5_HUMAN	13 kDa	1.9148	2.8462	2.8143	2.5251	2.0593	2.2539	2.0794	2.13087	1.18501	0.2449	0.274328	0.56173
NADH dehydrogenase [ubiquinone] 1 alpha subcomplex subunit 8 OS=Homo sapiens GN=NDUFA8 PE=1 SV=3	NDUA8_HUMAN	20 kDa	1.9148	1.8975	0.93809	1.58346	3.0889	2.2539	0	1.78093	0.88912	-0.16955	0.849738	0.0707149
NADH dehydrogenase [ubiquinone] 1 alpha subcomplex subunit 9, mitochondrial OS=Homo sapiens GN=NDUFA9 PE=1 SV=2	NDUA9_HUMAN	43 kDa	6.7018	3.795	0.93809	3.81163	2.0593	3.3808	2.0794	2.5065	1.5207	0.604734	0.490309	0.30953
NADH dehydrogenase [ubiquinone] 1 beta subcomplex subunit 10 OS=Homo sapiens GN=NDUFB10 PE=1 SV=3	NDUBA_HUMAN	21 kDa	2.8722	1.8975	1.8762	2.2153	3.0889	2.2539	2.0794	2.47407	0.895408	-0.159382	0.598194	0.223158
Acyl carrier protein, mitochondrial OS=Homo sapiens GN=NDUFAB1 PE=1 SV=3	ACPM_HUMAN	17 kDa	11.489	8.5387	8.4428	9.49017	8.2372	7.8886	10.397	8.84093	1.07343	0.102235	0.63635	0.196304
NADH-ubiquinone oxidoreductase 75 kDa subunit, mitochondrial OS=Homo sapiens GN=NDUFS1 PE=1 SV=3	NDUS1_HUMAN	79 kDa	7.6592	11.385	10.319	9.78773	12.356	4.5078	9.3574	8.7404	1.11983	0.163275	0.701316	0.154086
NADH dehydrogenase [ubiquinone] iron-sulfur protein 2, mitochondrial OS=Homo sapiens GN=NDUFS2 PE=1 SV=2	NDUS2_HUMAN	53 kDa	4.787	6.6412	3.7524	5.0602	3.0889	0	4.1588	2.4159	2.09454	1.06663	0.154003	0.812471
NADH dehydrogenase [ubiquinone] iron-sulfur protein 3, mitochondrial OS=Homo sapiens GN=NDUFS3 PE=1 SV=1	NDUS3_HUMAN	30 kDa	4.787	3.795	3.7524	4.11147	7.2075	9.0155	9.3574	8.5268	0.482182	-1.05235	0.00411637	2.38549
NADH dehydrogenase [ubiquinone] flavoprotein 1, mitochondrial OS=Homo sapiens GN=NDUFV1 PE=1 SV=4	NDUV1_HUMAN	51 kDa	6.7018	1.8975	3.7524	4.11723	5.1482	3.3808	1.0397	3.18957	1.29084	0.368315	0.640019	0.193807
NADH dehydrogenase [ubiquinone] flavoprotein 2, mitochondrial OS=Homo sapiens GN=NDUFV2 PE=1 SV=2	NDUV2_HUMAN	27 kDa	1.9148	1.8975	1.8762	1.89617	5.1482	5.6347	4.1588	4.98057	0.380713	-1.39322	0.00207752	2.68246
Cytochrome c oxidase subunit 4 isoform 1, mitochondrial OS=Homo sapiens GN=COX4I1 PE=1 SV=1	COX41_HUMAN	20 kDa	8.6166	6.6412	7.5047	7.5875	6.1779	6.7616	7.278	6.73917	1.12588	0.171054	0.264415	0.577713
Cytochrome c oxidase subunit 7A2, mitochondrial OS=Homo sapiens GN=COX7A2 PE=1 SV=1	CX7A2_HUMAN	9 kDa	2.8722	5.6925	1.8762	3.4803	4.1186	3.3808	3.1191	3.5395	0.983274	-0.0243339	0.962437	0.0166278
Cytochrome c oxidase subunit 6C OS=Homo sapiens GN=COX6C PE=1 SV=2	COX6C_HUMAN	9 kDa	4.787	0.94875	2.8143	2.85002	3.0889	2.2539	3.1191	2.82063	1.01042	0.0149512	0.980736	0.0084477
Cytochrome c oxidase subunit 5A, mitochondrial OS=Homo sapiens GN=COX5A PE=1 SV=2	COX5A_HUMAN	17 kDa	9.574	3.795	10.319	7.896	15.445	13.523	13.516	14.1613	0.557575	-0.842763	0.0440516	1.35604
Cytochrome c oxidase subunit 5B, mitochondrial OS=Homo sapiens GN=COX5B PE=1 SV=2	COX5B_HUMAN	14 kDa	6.7018	5.6925	7.5047	6.633	6.1779	6.7616	5.1986	6.04603	1.09708	0.133673	0.445807	0.350853
Cytochrome c oxidase subunit 6B1 OS=Homo sapiens GN=COX6B1 PE=1 SV=2	CX6B1_HUMAN	10 kDa	1.9148	1.8975	2.8143	2.20887	6.1779	4.5078	6.2383	5.64133	0.39155	-1.35273	0.00592579	2.22725
Cytochrome c1, heme protein, mitochondrial OS=Homo sapiens GN=CYC1 PE=1 SV=3	CY1_HUMAN	35 kDa	2.8722	3.795	1.8762	2.8478	19.563	20.285	17.675	19.1743	0.148521	-2.75126	6.87235e-05	4.16289
NADH dehydrogenase [ubiquinone] 1 beta subcomplex subunit 4 OS=Homo sapiens GN=NDUFB4 PE=1 SV=3	NDUB4_HUMAN	15 kDa	0.9574	0	0	0.319133	2.0593	3.3808	0	1.81337	0.175989	-2.50644	0.221997	0.653652
Inorganic pyrophosphatase 2, mitochondrial OS=Homo sapiens GN=PPA2 PE=1 SV=2	IPYR2_HUMAN	38 kDa	2.8722	1.8975	1.8762	2.2153	3.0889	5.6347	4.1588	4.29413	0.51589	-0.954865	0.0617591	1.2093
Inorganic pyrophosphatase OS=Homo sapiens GN=PPA1 PE=1 SV=2	IPYR_HUMAN	33 kDa	8.6166	12.334	13.133	11.3612	12.356	9.0155	10.397	10.5895	1.07287	0.101481	0.672659	0.172205
Succinate dehydrogenase [ubiquinone] flavoprotein subunit, mitochondrial OS=Homo sapiens GN=SDHA PE=1 SV=2	DHSA_HUMAN	73 kDa	8.6166	5.6925	9.3809	7.89667	7.2075	6.7616	6.2383	6.7358	1.17234	0.229394	0.372959	0.428339
Succinate dehydrogenase [ubiquinone] iron-sulfur subunit, mitochondrial OS=Homo sapiens GN=SDHB PE=1 SV=3	DHSB_HUMAN	32 kDa	1.9148	0	0.93809	0.950963	0	0	3.1191	1.0397	0.914652	-0.128706	0.943548	0.0252362
Succinate dehydrogenase cytochrome b560 subunit, mitochondrial OS=Homo sapiens GN=SDHC PE=1 SV=1	C560_HUMAN	19 kDa	0	0	0	0.1	4.1186	2.2539	1.0397	2.47073	0.0404738	-4.62687	0.0508812	1.29344
Cytochrome b-c1 complex subunit 1, mitochondrial OS=Homo sapiens GN=UQCRC1 PE=1 SV=3	QCR1_HUMAN	53 kDa	8.6166	12.334	10.319	10.4232	15.445	19.158	20.794	18.4657	0.564464	-0.825047	0.0136436	1.86507
Cytochrome b-c1 complex subunit 2, mitochondrial OS=Homo sapiens GN=UQCRC2 PE=1 SV=3	QCR2_HUMAN	48 kDa	8.6166	11.385	13.133	11.0449	16.474	16.904	17.675	17.0177	0.649024	-0.623657	0.0117945	1.92832
Cytochrome b-c1 complex subunit 6, mitochondrial OS=Homo sapiens GN=UQCRH PE=1 SV=2	QCR6_HUMAN	11 kDa	7.6592	11.385	9.3809	9.47503	14.415	21.412	18.715	18.1807	0.52116	-0.940202	0.019472	1.71059
Cluster of Cytochrome b-c1 complex subunit Rieske, mitochondrial OS=Homo sapiens GN=UQCRFS1 PE=1 SV=2 (UCRI_HUMAN)	UCRI_HUMAN [2]	30 kDa	1.9148	1.8975	1.8762	1.89617	7.2075	3.3808	5.1986	5.2623	0.36033	-1.47261	0.0381865	1.41809

## Sheet: D. Glycolysis
Identified Proteins	Accession Number	Molecular Weight	HC-04 CM B01	HC-04 CM B02	HC-04 CM B03	HC-04 CM avg.	HC-04 basic B01	HC-04 basic B02	HC-04 basic B03	HC-04 basic avg.	CM/basic	log2(CM/basic)	p-value	log10(p-value)
Triosephosphate isomerase OS=Homo sapiens GN=TPI1 PE=1 SV=3	TPIS_HUMAN	31 kDa	117.76	165.08	130.39	137.743	87.52	89.028	96.693	91.0803	1.51233	0.596771	0.0318519	1.49686
Acetyl-coenzyme A synthetase 2-like, mitochondrial OS=Homo sapiens GN=ACSS1 PE=1 SV=2	ACS2L_HUMAN	75 kDa	3.8296	2.8462	4.6905	3.78877	1.0296	4.5078	4.1588	3.23207	1.17224	0.229271	0.673685	0.171543
Alcohol dehydrogenase class-3 OS=Homo sapiens GN=ADH5 PE=1 SV=4	ADHX_HUMAN	40 kDa	0.9574	2.8462	1.8762	1.89327	5.1482	4.5078	4.1588	4.60493	0.411139	-1.2823	0.01177	1.92922
Aldehyde dehydrogenase X, mitochondrial OS=Homo sapiens GN=ALDH1B1 PE=1 SV=3	AL1B1_HUMAN	57 kDa	40.211	34.155	41.276	38.5473	61.779	64.235	61.343	62.4523	0.617228	-0.696124	0.000564575	3.24828
Cluster of Aldehyde dehydrogenase, mitochondrial OS=Homo sapiens GN=ALDH2 PE=1 SV=2 (ALDH2_HUMAN)	ALDH2_HUMAN [2]	56 kDa	30.637	28.462	32.833	30.644	33.978	36.062	30.152	33.3973	0.917558	-0.124128	0.267979	0.571899
Cluster of Fatty aldehyde dehydrogenase OS=Homo sapiens GN=ALDH3A2 PE=1 SV=1 (AL3A2_HUMAN)	AL3A2_HUMAN	55 kDa	11.489	10.436	10.319	10.748	9.2668	10.142	7.278	8.8956	1.20824	0.272904	0.115893	0.935943
Alpha-aminoadipic semialdehyde dehydrogenase OS=Homo sapiens GN=ALDH7A1 PE=1 SV=5	AL7A1_HUMAN	58 kDa	3.8296	1.8975	1.8762	2.53443	3.0889	4.5078	5.1986	4.2651	0.594226	-0.750916	0.125976	0.899711
Alcohol dehydrogenase [NADP(+)] OS=Homo sapiens GN=AKR1A1 PE=1 SV=3	AK1A1_HUMAN	37 kDa	8.6166	10.436	10.319	9.79053	9.2668	9.0155	9.3574	9.21323	1.06266	0.0876799	0.388134	0.411018
Fructose-bisphosphate aldolase A OS=Homo sapiens GN=ALDOA PE=1 SV=2	ALDOA_HUMAN	39 kDa	154.14	161.29	158.54	157.99	87.52	67.616	72.78	75.972	2.07958	1.05629	0.000202964	3.69258
Fructose-bisphosphate aldolase C OS=Homo sapiens GN=ALDOC PE=1 SV=2	ALDOC_HUMAN	39 kDa	18.191	21.821	16.886	18.966	9.2668	12.396	9.3574	10.3401	1.83422	0.87517	0.00868391	2.06128
Dihydrolipoyllysine-residue acetyltransferase component of pyruvate dehydrogenase complex, mitochondrial OS=Homo sapiens GN=DLAT PE=1 SV=3	ODP2_HUMAN	69 kDa	2.8722	2.8462	1.8762	2.53153	5.1482	3.3808	3.1191	3.8827	0.652003	-0.617049	0.132429	0.878016
Dihydrolipoyl dehydrogenase, mitochondrial OS=Homo sapiens GN=DLD PE=1 SV=2	DLDH_HUMAN	54 kDa	22.02	14.231	16.886	17.7123	18.534	18.031	21.834	19.4663	0.909896	-0.136227	0.533695	0.272706
Alpha-enolase OS=Homo sapiens GN=ENO1 PE=1 SV=2	ENOA_HUMAN	47 kDa	473.91	565.45	484.06	507.807	432.45	474.44	439.8	448.897	1.13123	0.177896	0.136952	0.86343
Beta-enolase OS=Homo sapiens GN=ENO3 PE=1 SV=4	ENOB_HUMAN	47 kDa	118.72	138.52	121.01	126.083	96.787	113.82	71.74	94.1157	1.33966	0.421871	0.0803664	1.09493
Gamma-enolase OS=Homo sapiens GN=ENO2 PE=1 SV=3	ENOG_HUMAN	47 kDa	96.698	114.8	92.871	101.456	79.283	99.171	61.343	79.9323	1.26928	0.344008	0.169204	0.771589
Aldose 1-epimerase OS=Homo sapiens GN=GALM PE=1 SV=1	GALM_HUMAN	38 kDa	0.9574	2.8462	3.7524	2.51867	2.0593	2.2539	3.1191	2.47743	1.01664	0.023814	0.965088	0.0154333
Glucose-6-phosphate isomerase OS=Homo sapiens GN=GPI PE=1 SV=4	G6PI_HUMAN	63 kDa	68.933	82.541	67.543	73.0057	35.008	34.935	48.866	39.603	1.84344	0.882399	0.00740553	2.13044
Glyceraldehyde-3-phosphate dehydrogenase OS=Homo sapiens GN=GAPDH PE=1 SV=3	G3P_HUMAN	36 kDa	325.52	334.91	340.53	333.653	270.8	243.42	252.65	255.623	1.30525	0.38433	0.00104058	2.98273
Cluster of Phosphoenolpyruvate carboxykinase [GTP], mitochondrial OS=Homo sapiens GN=PCK2 PE=1 SV=3 (PCKGM_HUMAN)	PCKGM_HUMAN	71 kDa	3.8296	4.7437	9.3809	5.98473	28.83	24.793	29.112	27.5783	0.217009	-2.20418	0.000618427	3.20871
6-phosphofructokinase, liver type OS=Homo sapiens GN=PFKL PE=1 SV=6	K6PL_HUMAN	85 kDa	7.6592	9.4875	9.3809	8.84253	11.326	12.396	14.556	12.7593	0.693025	-0.529021	0.02493	1.60328
Phosphoglucomutase-1 OS=Homo sapiens GN=PGM1 PE=1 SV=3	PGM1_HUMAN	61 kDa	4.787	6.6412	3.7524	5.0602	3.0889	3.3808	3.1191	3.19627	1.58316	0.662807	0.0934215	1.02955
Cluster of Phosphoglycerate kinase 1 OS=Homo sapiens GN=PGK1 PE=1 SV=3 (PGK1_HUMAN)	PGK1_HUMAN [2]	45 kDa	101.48	103.41	113.51	106.133	74.134	73.251	86.296	77.8937	1.36254	0.4463	0.00737854	2.13203
Phosphoglycerate mutase 1 OS=Homo sapiens GN=PGAM1 PE=1 SV=2	PGAM1_HUMAN	29 kDa	86.166	86.336	85.366	85.956	44.275	43.951	49.906	46.044	1.86682	0.900585	3.40814e-05	4.46748
Pyruvate dehydrogenase E1 component subunit alpha, somatic form, mitochondrial OS=Homo sapiens GN=PDHA1 PE=1 SV=3	ODPA_HUMAN	43 kDa	2.8722	2.8462	0.93809	2.21883	5.1482	4.5078	3.1191	4.25837	0.521052	-0.940501	0.0805959	1.09369
Pyruvate dehydrogenase E1 component subunit beta, mitochondrial OS=Homo sapiens GN=PDHB PE=1 SV=3	ODPB_HUMAN	39 kDa	1.9148	3.795	3.7524	3.15407	7.2075	7.8886	5.1986	6.7649	0.46624	-1.10086	0.0238541	1.62244
Pyruvate kinase isozymes M1/M2 OS=Homo sapiens GN=PKM PE=1 SV=4	KPYM_HUMAN	58 kDa	176.16	223.9	203.57	201.21	114.29	83.393	98.773	98.8187	2.03615	1.02585	0.00339852	2.46871
