# Supplementary material for: The Selection of a Hepatocyte Cell Line Susceptible to Plasmodium falciparum Sporozoite Invasion That Is Associated With Expression of Glypican-3
Source: Front Microbiol. 2019 Feb 28;10:127. doi: 10.3389/fmicb.2019.00127 (PMC6413710; doi:10.3389/fmicb.2019.00127)
Supplement: Supplementary file 2 [file Table_2.XLSX]

## Sheet: Legend
Table S2. Protein identification data for proteins identified in HC-04 grown in MEM + F12 (CM) and DMEM-NoGlc (basic) medium
Data labelling
Cell line	Media used [Basic (B) or MEM+F12 (CM)]	Replicate no.
HC04Navy	Basic	B01
		B02
		B03
	CM	B01
		B02
		B03
Same identifiers are used in the raw data labelling
Data Search Details
Search Engines: Mascot v2.4.1
Database: SwissProt human 2012 protein FASTA sequence (20,234 sequences)
Modifications: Carbamidomethyl (fixed), Oxidation (M) Variable
Digestion: Trypsin
Instrument: ESI QTOF
Precursor Tolerance: 50 ppm
Fragment Tolerance: 0.2 Da
Result Analysis
Minimum Peptide length: 5 aminoacids
Minimum peptide for a protein: 2
Protein FDR: 1%
Peptide FDR: 1%
Sample	Sample ID for given protein data
Protein accession number	Accession Number
Protein description	Description of the protein
MW [kDa]	Molecular weight of the protein
Coverage [%]	Coverage of the protein by peptides expressed as a percentage
#Peptides	Number of distinct peptides for the protein in a given sample
#Unique peptides	Number of peptides identified only in a given sample for the protein

## Sheet: Protein Data
				HC04Navy_CM									HC04Navy_B
				B01			B02			B03			B01			B02			B03
ID	Protein accession	Protein description	MW [kDa]	Coverage [%]	#Peptides	#Unique peptides	Coverage [%]	#Peptides	#Unique peptides	Coverage [%]	#Peptides	#Unique peptides	Coverage [%]	#Peptides	#Unique peptides	Coverage [%]	#Peptides	#Unique peptides	Coverage [%]	#Peptides	#Unique peptides
1.1	ACTB_HUMAN (+1)	Actin, cytoplasmic 1 OS=Homo sapiens GN=ACTB PE=1 SV=1	42 kDa	0.653	20	8	0.64	19	8	0.653	20	8	0.635	16	7	0.669	18	8	0.64	17	8
1.2	ACTC_HUMAN	Actin, alpha cardiac muscle 1 OS=Homo sapiens GN=ACTC1 PE=1 SV=1	42 kDa	0.334	10	2	0.321	9	2	0.334	10	2	0.249	8	1	0.279	9	1	0.329	9	2
1.3	ACTBL_HUMAN	Beta-actin-like protein 2 OS=Homo sapiens GN=ACTBL2 PE=1 SV=2	42 kDa	0.0931	3	0	0.0798	3	0	0.168	4	1	0.0931	3	0	0.168	4	1	0.168	4	1
1.4	POTEE_HUMAN	POTE ankyrin domain family member E OS=Homo sapiens GN=POTEE PE=1 SV=3	121 kDa	0.0716	7	0	0.0716	7	0	0.0716	7	0	0.0781	6	0	0.0781	6	0	0.0781	6	0
1.5	POTEI_HUMAN	POTE ankyrin domain family member I OS=Homo sapiens GN=POTEI PE=3 SV=1	121 kDa	0	0	0	0	0	0	0	0	0	0	0	0	0	0	0	0	0	0
2.1	HS90B_HUMAN	Heat shock protein HSP 90-beta OS=Homo sapiens GN=HSP90AB1 PE=1 SV=4	83 kDa	0.499	36	19	0.483	34	18	0.485	34	17	0.53	36	18	0.537	34	17	0.526	34	17
2.2	HS90A_HUMAN	Heat shock protein HSP 90-alpha OS=Homo sapiens GN=HSP90AA1 PE=1 SV=5	85 kDa	0.469	36	18	0.463	32	16	0.485	36	18	0.454	33	15	0.452	32	15	0.452	31	14
2.3	H90B4_HUMAN	Putative heat shock protein HSP 90-beta 4 OS=Homo sapiens GN=HSP90AB4P PE=5 SV=1	58 kDa	0.0931	5	1	0.0931	4	1	0.0931	5	1	0.119	6	1	0.0931	5	1	0.0931	5	1
2.4	HS905_HUMAN	Putative heat shock protein HSP 90-alpha A5 OS=Homo sapiens GN=HSP90AA5P PE=1 SV=1	39 kDa	0	0	0	0	0	0	0	0	0	0.117	4	0	0	0	0	0.117	3	0
2.5	HS904_HUMAN	Putative heat shock protein HSP 90-alpha A4 OS=Homo sapiens GN=HSP90AA4P PE=5 SV=1	48 kDa	0	0	0	0.0574	2	0	0	0	0	0	0	0	0	0	0	0	0	0
3.1	TBB5_HUMAN	Tubulin beta chain OS=Homo sapiens GN=TUBB PE=1 SV=2	50 kDa	0.655	23	3	0.655	23	3	0.714	25	4	0.709	24	4	0.651	22	3	0.671	23	3
3.2	TBB3_HUMAN	Tubulin beta-3 chain OS=Homo sapiens GN=TUBB3 PE=1 SV=2	50 kDa	0.353	15	1	0.353	15	1	0.384	16	2	0.478	17	4	0.387	15	2	0.531	19	5
3.3	TBB4B_HUMAN	Tubulin beta-4B chain OS=Homo sapiens GN=TUBB4B PE=1 SV=1	50 kDa	0.694	24	1	0.654	23	1	0.715	25	1	0.708	23	1	0.688	22	1	0.67	23	1
3.4	TBB4A_HUMAN	Tubulin beta-4A chain OS=Homo sapiens GN=TUBB4A PE=1 SV=2	50 kDa	0.599	20	1	0.599	20	1	0.619	21	1	0.615	20	1	0.595	19	1	0.615	20	1
3.5	TBB2A_HUMAN (+1)	Tubulin beta-2A chain OS=Homo sapiens GN=TUBB2A PE=1 SV=1	50 kDa	0.508	19	1	0.467	18	1	0.508	19	1	0.501	17	1	0.501	17	1	0.49	17	1
3.6	TBB6_HUMAN	Tubulin beta-6 chain OS=Homo sapiens GN=TUBB6 PE=1 SV=1	50 kDa	0.168	8	1	0.13	7	0	0.13	7	0	0.168	8	1	0.168	8	1	0.157	8	0
3.7	TBB8_HUMAN	Tubulin beta-8 chain OS=Homo sapiens GN=TUBB8 PE=1 SV=2	50 kDa	0.227	10	0	0.227	10	0	0.227	10	0	0.227	10	0	0.227	10	0	0.227	10	0
3.8	TBB8L_HUMAN	Tubulin beta-8 chain-like protein LOC260334 OS=Homo sapiens PE=1 SV=1	50 kDa	0.194	9	0	0.194	9	0	0.194	9	0	0.194	9	0	0.194	9	0	0.194	9	0
3.9	TBB1_HUMAN	Tubulin beta-1 chain OS=Homo sapiens GN=TUBB1 PE=1 SV=1	50 kDa	0	0	0	0	0	0	0.0466	4	0	0	0	0	0	0	0	0	0	0
4	CH60_HUMAN	60 kDa heat shock protein, mitochondrial OS=Homo sapiens GN=HSPD1 PE=1 SV=2	61 kDa	0.696	32	32	0.735	34	34	0.729	32	32	0.71	33	33	0.757	35	35	0.717	33	33
5	EF1A1_HUMAN	Elongation factor 1-alpha 1 OS=Homo sapiens GN=EEF1A1 PE=1 SV=1	50 kDa	0.578	16	16	0.578	17	17	0.578	17	17	0.6	17	17	0.649	19	19	0.649	19	19
6.1	AK1C3_HUMAN	Aldo-keto reductase family 1 member C3 OS=Homo sapiens GN=AKR1C3 PE=1 SV=4	37 kDa	0.601	15	6	0.551	14	5	0.554	15	6	0.551	14	5	0.455	13	4	0.455	13	4
6.2	AK1C1_HUMAN	Aldo-keto reductase family 1 member C1 OS=Homo sapiens GN=AKR1C1 PE=1 SV=1	37 kDa	0.635	16	1	0.635	16	1	0.585	15	1	0.635	16	1	0.585	15	1	0.635	16	1
6.3	AK1C2_HUMAN	Aldo-keto reductase family 1 member C2 OS=Homo sapiens GN=AKR1C2 PE=1 SV=3	37 kDa	0.498	12	2	0.498	12	2	0.449	11	2	0.582	13	3	0.533	12	3	0.498	12	2
7	ENOA_HUMAN	Alpha-enolase OS=Homo sapiens GN=ENO1 PE=1 SV=2	47 kDa	0.698	26	23	0.68	25	22	0.68	25	22	0.673	22	19	0.673	22	19	0.673	23	20
8	G3P_HUMAN	Glyceraldehyde-3-phosphate dehydrogenase OS=Homo sapiens GN=GAPDH PE=1 SV=3	36 kDa	0.657	16	16	0.701	19	19	0.696	18	18	0.615	14	14	0.606	14	14	0.618	14	14
9.1	TBA1B_HUMAN	Tubulin alpha-1B chain OS=Homo sapiens GN=TUBA1B PE=1 SV=1	50 kDa	0.519	18	2	0.517	18	2	0.563	20	2	0.581	20	2	0.548	18	1	0.581	21	2
9.2	TBA1C_HUMAN	Tubulin alpha-1C chain OS=Homo sapiens GN=TUBA1C PE=1 SV=1	50 kDa	0.521	18	2	0.519	18	2	0.528	19	1	0.584	20	2	0.55	18	2	0.581	20	2
9.3	TBA3E_HUMAN	Tubulin alpha-3E chain OS=Homo sapiens GN=TUBA3E PE=1 SV=2	50 kDa	0.371	12	0	0.369	11	0	0.371	12	0	0.371	12	0	0.369	11	0	0.369	11	0
9.4	TBA8_HUMAN	Tubulin alpha-8 chain OS=Homo sapiens GN=TUBA8 PE=1 SV=1	50 kDa	0.292	11	0	0.29	11	0	0.336	13	0	0.336	12	0	0.303	10	0	0.334	12	0
10	EF2_HUMAN	Elongation factor 2 OS=Homo sapiens GN=EEF2 PE=1 SV=4	95 kDa	0.534	40	39	0.531	37	36	0.536	36	35	0.534	38	37	0.473	33	33	0.534	37	36
11	GRP78_HUMAN	78 kDa glucose-regulated protein OS=Homo sapiens GN=HSPA5 PE=1 SV=2	72 kDa	0.439	26	24	0.44	25	23	0.456	27	25	0.483	31	29	0.483	31	29	0.528	32	30
12	PDIA1_HUMAN	Protein disulfide-isomerase OS=Homo sapiens GN=P4HB PE=1 SV=3	57 kDa	0.543	26	26	0.537	25	25	0.571	25	25	0.5	22	22	0.53	23	23	0.547	25	25
13.1	ACTN4_HUMAN	Alpha-actinin-4 OS=Homo sapiens GN=ACTN4 PE=1 SV=2	105 kDa	0.484	34	21	0.535	38	24	0.512	37	23	0.457	31	18	0.474	33	20	0.477	35	21
13.2	ACTN1_HUMAN	Alpha-actinin-1 OS=Homo sapiens GN=ACTN1 PE=1 SV=2	103 kDa	0.263	20	8	0.313	23	10	0.298	24	11	0.256	18	6	0.263	19	7	0.308	23	10
13.3	ACTN3_HUMAN	Alpha-actinin-3 OS=Homo sapiens GN=ACTN3 PE=1 SV=2	103 kDa	0	0	0	0.0622	6	0	0	0	0	0	0	0	0	0	0	0	0	0
14	ATPB_HUMAN	ATP synthase subunit beta, mitochondrial OS=Homo sapiens GN=ATP5B PE=1 SV=3	57 kDa	0.612	22	22	0.639	24	24	0.658	24	24	0.677	24	24	0.631	23	23	0.677	24	24
15	H4_HUMAN	Histone H4 OS=Homo sapiens GN=HIST1H4A PE=1 SV=2	11 kDa	0.534	9	9	0.534	9	9	0.534	9	9	0.437	8	8	0.534	9	9	0.437	8	8
16.1	ENPL_HUMAN	Endoplasmin OS=Homo sapiens GN=HSP90B1 PE=1 SV=1	92 kDa	0.407	30	27	0.36	26	23	0.367	26	24	0.423	32	28	0.415	34	29	0.486	37	33
16.2	ENPLL_HUMAN	Putative endoplasmin-like protein OS=Homo sapiens GN=HSP90B2P PE=5 SV=1	46 kDa	0.0226	1	0	0	0	0	0	0	0	0	0	0	0	0	0	0.0476	2	0
17	HSP7C_HUMAN	Heat shock cognate 71 kDa protein OS=Homo sapiens GN=HSPA8 PE=1 SV=1	71 kDa	0.494	29	26	0.514	29	26	0.471	28	25	0.556	28	25	0.478	26	23	0.531	30	27
18.1	LDHA_HUMAN	L-lactate dehydrogenase A chain OS=Homo sapiens GN=LDHA PE=1 SV=2	37 kDa	0.614	17	16	0.509	16	15	0.614	17	16	0.56	18	17	0.377	14	13	0.428	16	15
18.2	LDH6A_HUMAN	L-lactate dehydrogenase A-like 6A OS=Homo sapiens GN=LDHAL6A PE=2 SV=1	37 kDa	0	0	0	0	0	0	0	0	0	0.0361	1	0	0	0	0	0	0	0
19	AL1A1_HUMAN	Retinal dehydrogenase 1 OS=Homo sapiens GN=ALDH1A1 PE=1 SV=2	55 kDa	0.687	24	22	0.689	27	24	0.687	26	24	0.597	22	20	0.559	21	20	0.573	21	20
20	UGDH_HUMAN	UDP-glucose 6-dehydrogenase OS=Homo sapiens GN=UGDH PE=1 SV=1	55 kDa	0.678	28	28	0.636	27	27	0.678	28	28	0.628	27	27	0.64	26	26	0.668	27	27
21	NPM_HUMAN	Nucleophosmin OS=Homo sapiens GN=NPM1 PE=1 SV=2	33 kDa	0.412	6	6	0.286	5	5	0.286	5	5	0.289	6	6	0.289	5	5	0.316	6	6
22	CALR_HUMAN	Calreticulin OS=Homo sapiens GN=CALR PE=1 SV=1	48 kDa	0.566	14	14	0.566	15	15	0.566	15	15	0.566	15	15	0.544	13	13	0.544	13	13
23	PPIA_HUMAN	Peptidyl-prolyl cis-trans isomerase A OS=Homo sapiens GN=PPIA PE=1 SV=2	18 kDa	0.733	11	11	0.745	12	12	0.667	11	11	0.667	10	10	0.667	11	11	0.667	10	10
24	FAS_HUMAN	Fatty acid synthase OS=Homo sapiens GN=FASN PE=1 SV=3	273 kDa	0.299	50	50	0.315	52	52	0.337	55	55	0.335	55	55	0.282	47	47	0.295	50	50
25	KPYM_HUMAN	Pyruvate kinase isozymes M1/M2 OS=Homo sapiens GN=PKM PE=1 SV=4	58 kDa	0.533	23	23	0.544	23	23	0.574	24	24	0.586	25	25	0.52	21	21	0.524	22	22
26	PDIA3_HUMAN	Protein disulfide-isomerase A3 OS=Homo sapiens GN=PDIA3 PE=1 SV=4	57 kDa	0.489	23	23	0.489	24	24	0.552	26	26	0.552	26	26	0.487	26	26	0.576	28	28
27	H2B1M_HUMAN	Histone H2B type 1-M OS=Homo sapiens GN=HIST1H2BM PE=1 SV=3	14 kDa	0.357	5	5	0.357	5	5	0.357	5	5	0.27	4	4	0.27	4	4	0.357	5	5
28	NUCL_HUMAN	Nucleolin OS=Homo sapiens GN=NCL PE=1 SV=3	77 kDa	0.265	16	16	0.276	16	16	0.265	15	15	0.276	20	20	0.276	20	20	0.265	16	16
29	AK1BA_HUMAN	Aldo-keto reductase family 1 member B10 OS=Homo sapiens GN=AKR1B10 PE=1 SV=2	36 kDa	0.617	15	15	0.617	16	16	0.617	15	15	0.655	15	15	0.566	14	14	0.658	15	15
30	PRDX1_HUMAN	Peroxiredoxin-1 OS=Homo sapiens GN=PRDX1 PE=1 SV=1	22 kDa	0.719	15	12	0.653	13	11	0.673	14	11	0.698	13	11	0.698	14	12	0.698	14	12
31.1	SPTB2_HUMAN	Spectrin beta chain, non-erythrocytic 1 OS=Homo sapiens GN=SPTBN1 PE=1 SV=2	275 kDa	0.237	35	33	0.259	39	38	0.247	37	35	0.308	47	45	0.298	45	44	0.292	43	41
31.2	SPTB1_HUMAN	Spectrin beta chain, erythrocytic OS=Homo sapiens GN=SPTB PE=1 SV=5	246 kDa	0	0	0	0.00468	1	0	0.00562	2	0	0	0	0	0.00468	1	0	0	0	0
31.3	SPTN2_HUMAN	Spectrin beta chain, non-erythrocytic 2 OS=Homo sapiens GN=SPTBN2 PE=1 SV=3	271 kDa	0	0	0	0	0	0	0	0	0	0	0	0	0	0	0	0	0	0
32	ALDOA_HUMAN	Fructose-bisphosphate aldolase A OS=Homo sapiens GN=ALDOA PE=1 SV=2	39 kDa	0.582	13	12	0.646	14	13	0.67	15	14	0.668	15	14	0.668	15	14	0.541	12	11
33	ATPA_HUMAN	ATP synthase subunit alpha, mitochondrial OS=Homo sapiens GN=ATP5A1 PE=1 SV=1	60 kDa	0.351	15	15	0.351	15	15	0.351	15	15	0.41	17	17	0.41	17	17	0.41	17	17
34.1	CLH1_HUMAN	Clathrin heavy chain 1 OS=Homo sapiens GN=CLTC PE=1 SV=5	192 kDa	0.302	37	27	0.26	31	23	0.307	35	28	0.325	40	30	0.303	35	26	0.297	36	27
34.2	CLH2_HUMAN	Clathrin heavy chain 2 OS=Homo sapiens GN=CLTCL1 PE=1 SV=2	187 kDa	0.0738	10	0	0	0	0	0	0	0	0	0	0	0	0	0	0	0	0
35.1	NDKB_HUMAN	Nucleoside diphosphate kinase B OS=Homo sapiens GN=NME2 PE=1 SV=1	17 kDa	0.559	9	4	0.684	10	5	0.559	9	4	0.684	10	5	0.559	9	4	0.684	10	5
35.2	NDKA_HUMAN	Nucleoside diphosphate kinase A OS=Homo sapiens GN=NME1 PE=1 SV=1	17 kDa	0.579	9	4	0.579	9	4	0.704	10	5	0.704	10	5	0.704	10	5	0.704	10	5
36	TPIS_HUMAN	Triosephosphate isomerase OS=Homo sapiens GN=TPI1 PE=1 SV=3	31 kDa	0.598	13	13	0.727	16	16	0.727	16	16	0.643	14	14	0.587	13	13	0.587	13	13
37	ANXA5_HUMAN	Annexin A5 OS=Homo sapiens GN=ANXA5 PE=1 SV=2	36 kDa	0.394	13	13	0.422	13	13	0.391	12	12	0.494	14	14	0.503	13	13	0.503	13	13
38	RS27A_HUMAN	Ubiquitin-40S ribosomal protein S27a OS=Homo sapiens GN=RPS27A PE=1 SV=2	18 kDa	0.506	7	7	0.519	8	8	0.506	7	7	0.506	7	7	0.506	7	7	0.506	7	7
39	MDHM_HUMAN	Malate dehydrogenase, mitochondrial OS=Homo sapiens GN=MDH2 PE=1 SV=3	36 kDa	0.556	14	14	0.527	13	13	0.556	14	14	0.556	14	14	0.556	14	14	0.556	14	14
40	ECHA_HUMAN	Trifunctional enzyme subunit alpha, mitochondrial OS=Homo sapiens GN=HADHA PE=1 SV=2	83 kDa	0.422	23	23	0.413	22	22	0.421	23	23	0.498	28	28	0.456	25	25	0.473	26	26
41	PGK1_HUMAN	Phosphoglycerate kinase 1 OS=Homo sapiens GN=PGK1 PE=1 SV=3	45 kDa	0.552	16	16	0.47	13	13	0.513	15	15	0.513	14	14	0.561	16	16	0.47	14	14
42	HNRPK_HUMAN	Heterogeneous nuclear ribonucleoprotein K OS=Homo sapiens GN=HNRNPK PE=1 SV=1	51 kDa	0.499	16	16	0.503	17	17	0.523	17	17	0.445	14	14	0.449	14	14	0.462	15	15
43	ANXA4_HUMAN	Annexin A4 OS=Homo sapiens GN=ANXA4 PE=1 SV=4	36 kDa	0.498	14	14	0.451	13	13	0.495	15	15	0.439	12	12	0.436	11	11	0.401	10	10
44	NQO1_HUMAN	NAD(P)H dehydrogenase [quinone] 1 OS=Homo sapiens GN=NQO1 PE=1 SV=1	31 kDa	0.365	10	10	0.361	9	9	0.365	10	10	0.361	10	10	0.42	11	11	0.365	10	10
45	LPPRC_HUMAN	Leucine-rich PPR motif-containing protein, mitochondrial OS=Homo sapiens GN=LRPPRC PE=1 SV=3	158 kDa	0.343	35	35	0.293	31	31	0.374	38	38	0.326	35	35	0.259	29	29	0.295	31	31
46	XRCC5_HUMAN	X-ray repair cross-complementing protein 5 OS=Homo sapiens GN=XRCC5 PE=1 SV=3	83 kDa	0.347	20	20	0.294	16	16	0.32	17	17	0.324	18	18	0.291	16	16	0.336	20	20
47	CH10_HUMAN	10 kDa heat shock protein, mitochondrial OS=Homo sapiens GN=HSPE1 PE=1 SV=2	11 kDa	0.608	6	6	0.608	6	6	0.608	6	6	0.667	8	8	0.667	8	8	0.667	8	8
48	GRP75_HUMAN	Stress-70 protein, mitochondrial OS=Homo sapiens GN=HSPA9 PE=1 SV=2	74 kDa	0.308	17	17	0.342	17	17	0.37	19	19	0.351	18	18	0.376	20	20	0.378	20	20
49	SPTN1_HUMAN	Spectrin alpha chain, non-erythrocytic 1 OS=Homo sapiens GN=SPTAN1 PE=1 SV=3	285 kDa	0.196	33	33	0.23	38	38	0.223	35	35	0.241	44	44	0.269	44	44	0.267	47	47
50.1	FLNB_HUMAN	Filamin-B OS=Homo sapiens GN=FLNB PE=1 SV=2	278 kDa	0.226	36	35	0.242	40	39	0.245	40	39	0.298	46	44	0.24	40	38	0.289	47	45
50.2	FLNC_HUMAN	Filamin-C OS=Homo sapiens GN=FLNC PE=1 SV=3	291 kDa	0.00661	1	0	0	0	0	0	0	0	0	0	0	0	0	0	0	0	0
51.1	DHE3_HUMAN	Glutamate dehydrogenase 1, mitochondrial OS=Homo sapiens GN=GLUD1 PE=1 SV=2	61 kDa	0.498	22	8	0.427	19	7	0.484	21	8	0.443	21	8	0.398	18	7	0.457	22	8
51.2	DHE4_HUMAN	Glutamate dehydrogenase 2, mitochondrial OS=Homo sapiens GN=GLUD2 PE=1 SV=2	61 kDa	0.303	14	0	0.26	12	0	0.289	13	0	0.26	13	0	0.231	11	0	0.274	14	0
52	PDIA6_HUMAN	Protein disulfide-isomerase A6 OS=Homo sapiens GN=PDIA6 PE=1 SV=1	48 kDa	0.391	12	12	0.35	10	10	0.382	11	11	0.473	14	14	0.45	14	14	0.441	14	14
53	PEBP1_HUMAN	Phosphatidylethanolamine-binding protein 1 OS=Homo sapiens GN=PEBP1 PE=1 SV=3	21 kDa	0.738	11	11	0.695	9	9	0.695	10	10	0.738	11	11	0.642	9	9	0.738	11	11
54.1	H31_HUMAN	Histone H3.1 OS=Homo sapiens GN=HIST1H3A PE=1 SV=2	15 kDa	0.382	3	1	0.382	3	1	0.301	2	1	0.301	2	1	0.301	2	1	0.301	2	1
54.2	H33_HUMAN	Histone H3.3 OS=Homo sapiens GN=H3F3A PE=1 SV=2	15 kDa	0.382	3	1	0.382	3	1	0.301	2	1	0.301	2	1	0.301	2	1	0.301	2	1
54.3	H32_HUMAN	Histone H3.2 OS=Homo sapiens GN=HIST2H3A PE=1 SV=3	15 kDa	0.382	3	1	0.382	3	1	0.301	2	1	0.301	2	1	0.301	2	1	0.301	2	1
54.4	H31T_HUMAN	Histone H3.1t OS=Homo sapiens GN=HIST3H3 PE=1 SV=3	16 kDa	0.147	2	0	0.147	2	0	0.0662	1	0	0.14	2	1	0.0662	1	0	0.14	2	1
54.5	H3C_HUMAN	Histone H3.3C OS=Homo sapiens GN=H3F3C PE=1 SV=3	15 kDa	0.0667	1	0	0.0667	1	0	0.0667	1	0	0.0667	1	0	0.0667	1	0	0.0667	1	0
55	TERA_HUMAN	Transitional endoplasmic reticulum ATPase OS=Homo sapiens GN=VCP PE=1 SV=4	89 kDa	0.469	26	25	0.417	25	24	0.504	29	28	0.419	23	22	0.434	24	23	0.459	26	25
56	HSP71_HUMAN	Heat shock 70 kDa protein 1A/1B OS=Homo sapiens GN=HSPA1A PE=1 SV=5	70 kDa	0.309	14	12	0.398	18	16	0.356	16	14	0.446	19	17	0.48	22	20	0.46	20	18
57	DHRS2_HUMAN	Dehydrogenase/reductase SDR family member 2 OS=Homo sapiens GN=DHRS2 PE=1 SV=3	27 kDa	0.376	7	7	0.415	8	8	0.446	9	9	0.407	8	8	0.442	8	8	0.512	10	10
58	SODC_HUMAN	Superoxide dismutase [Cu-Zn] OS=Homo sapiens GN=SOD1 PE=1 SV=2	16 kDa	0.539	3	3	0.578	4	4	0.578	4	4	0.604	4	4	0.539	3	3	0.539	3	3
59.1	H2A1D_HUMAN (+6)	Histone H2A type 1-D OS=Homo sapiens GN=HIST1H2AD PE=1 SV=2	14 kDa	0.3	3	1	0.3	3	1	0.3	3	1	0.3	3	1	0.3	3	1	0.3	3	1
59.2	H2A1B_HUMAN (+2)	Histone H2A type 1-B/E OS=Homo sapiens GN=HIST1H2AB PE=1 SV=2	14 kDa	0.3	3	1	0.3	3	1	0.3	3	1	0.3	3	1	0.3	3	1	0.3	3	1
60	GDIB_HUMAN	Rab GDP dissociation inhibitor beta OS=Homo sapiens GN=GDI2 PE=1 SV=2	51 kDa	0.609	25	25	0.591	24	24	0.663	25	25	0.501	19	19	0.458	17	17	0.535	19	19
61	CALX_HUMAN	Calnexin OS=Homo sapiens GN=CANX PE=1 SV=2	68 kDa	0.291	13	13	0.291	13	13	0.289	12	12	0.302	13	13	0.299	16	16	0.321	14	14
62	COF1_HUMAN	Cofilin-1 OS=Homo sapiens GN=CFL1 PE=1 SV=3	19 kDa	0.506	8	8	0.627	8	8	0.506	8	8	0.596	9	9	0.476	7	7	0.578	8	8
63	IDHC_HUMAN	Isocitrate dehydrogenase [NADP] cytoplasmic OS=Homo sapiens GN=IDH1 PE=1 SV=2	47 kDa	0.428	14	13	0.389	14	13	0.36	12	11	0.437	15	14	0.464	15	14	0.326	12	11
64	H12_HUMAN (+1)	Histone H1.2 OS=Homo sapiens GN=HIST1H1C PE=1 SV=2	21 kDa	0.254	8	8	0.296	9	8	0.254	8	8	0.16	6	6	0.16	6	6	0.16	6	6
65	ROA2_HUMAN	Heterogeneous nuclear ribonucleoproteins A2/B1 OS=Homo sapiens GN=HNRNPA2B1 PE=1 SV=2	37 kDa	0.467	16	13	0.51	15	14	0.535	17	15	0.456	13	12	0.38	12	11	0.428	14	12
66	PGAM1_HUMAN	Phosphoglycerate mutase 1 OS=Homo sapiens GN=PGAM1 PE=1 SV=2	29 kDa	0.61	13	13	0.504	12	12	0.65	14	14	0.602	11	11	0.5	10	10	0.496	10	10
67.1	IF4A1_HUMAN	Eukaryotic initiation factor 4A-I OS=Homo sapiens GN=EIF4A1 PE=1 SV=1	46 kDa	0.431	13	7	0.475	16	10	0.374	12	7	0.498	15	8	0.441	14	8	0.426	13	8
67.2	IF4A2_HUMAN	Eukaryotic initiation factor 4A-II OS=Homo sapiens GN=EIF4A2 PE=1 SV=2	46 kDa	0.189	7	1	0.206	7	1	0.187	6	1	0.209	8	1	0.206	7	1	0.187	6	1
68	G6PI_HUMAN	Glucose-6-phosphate isomerase OS=Homo sapiens GN=GPI PE=1 SV=4	63 kDa	0.353	14	14	0.412	15	15	0.412	16	16	0.204	9	9	0.21	9	9	0.237	12	12
69	PDIA4_HUMAN	Protein disulfide-isomerase A4 OS=Homo sapiens GN=PDIA4 PE=1 SV=2	73 kDa	0.293	17	17	0.35	20	20	0.363	20	20	0.395	22	22	0.391	23	23	0.428	24	24
70	XRCC6_HUMAN	X-ray repair cross-complementing protein 6 OS=Homo sapiens GN=XRCC6 PE=1 SV=2	70 kDa	0.368	17	17	0.348	17	17	0.368	18	18	0.366	17	17	0.338	18	18	0.332	16	16
71	PRDX2_HUMAN	Peroxiredoxin-2 OS=Homo sapiens GN=PRDX2 PE=1 SV=5	22 kDa	0.53	11	10	0.485	9	8	0.53	10	9	0.53	10	9	0.333	8	7	0.53	10	9
72	PPIB_HUMAN	Peptidyl-prolyl cis-trans isomerase B OS=Homo sapiens GN=PPIB PE=1 SV=2	24 kDa	0.389	8	8	0.509	11	11	0.389	9	9	0.449	11	11	0.352	9	9	0.389	9	9
73	STIP1_HUMAN	Stress-induced-phosphoprotein 1 OS=Homo sapiens GN=STIP1 PE=1 SV=1	63 kDa	0.273	13	13	0.278	14	14	0.319	16	16	0.195	9	9	0.249	10	10	0.239	11	11
74	HNRPU_HUMAN	Heterogeneous nuclear ribonucleoprotein U OS=Homo sapiens GN=HNRNPU PE=1 SV=6	91 kDa	0.194	9	9	0.185	11	11	0.218	12	12	0.219	13	13	0.176	11	11	0.184	12	12
75	SAHH_HUMAN	Adenosylhomocysteinase OS=Homo sapiens GN=AHCY PE=1 SV=4	48 kDa	0.361	14	13	0.384	15	14	0.359	14	13	0.356	13	12	0.354	13	11	0.398	15	14
76	SODM_HUMAN	Superoxide dismutase [Mn], mitochondrial OS=Homo sapiens GN=SOD2 PE=1 SV=2	25 kDa	0.306	6	6	0.306	6	6	0.419	7	7	0.342	8	8	0.342	7	7	0.342	7	7
77	ROA1_HUMAN	Heterogeneous nuclear ribonucleoprotein A1 OS=Homo sapiens GN=HNRNPA1 PE=1 SV=5	39 kDa	0.376	12	9	0.323	8	7	0.288	9	7	0.39	11	10	0.325	9	8	0.328	10	8
78	RL4_HUMAN	60S ribosomal protein L4 OS=Homo sapiens GN=RPL4 PE=1 SV=5	48 kDa	0.361	13	13	0.384	15	15	0.405	16	16	0.323	13	13	0.358	14	14	0.323	13	13
79.1	ADT2_HUMAN	ADP/ATP translocase 2 OS=Homo sapiens GN=SLC25A5 PE=1 SV=7	33 kDa	0.262	9	2	0.285	9	3	0.285	9	3	0.339	11	3	0.312	9	3	0.349	11	4
79.2	ADT3_HUMAN	ADP/ATP translocase 3 OS=Homo sapiens GN=SLC25A6 PE=1 SV=4	33 kDa	0.215	7	0	0.232	7	1	0.188	6	0	0.336	10	1	0.279	8	1	0.309	9	1
79.3	ADT1_HUMAN	ADP/ATP translocase 1 OS=Homo sapiens GN=SLC25A4 PE=1 SV=4	33 kDa	0.128	4	0	0.101	3	0	0.101	3	0	0.205	6	0	0.205	6	0	0.205	6	0
80	FLNA_HUMAN	Filamin-A OS=Homo sapiens GN=FLNA PE=1 SV=4	281 kDa	0.179	27	27	0.135	22	22	0.182	28	28	0.187	31	30	0.182	30	29	0.175	29	28
81	PROF1_HUMAN	Profilin-1 OS=Homo sapiens GN=PFN1 PE=1 SV=2	15 kDa	0.557	8	8	0.657	9	9	0.457	7	7	0.543	7	7	0.521	6	6	0.543	7	7
82	FSCN1_HUMAN	Fascin OS=Homo sapiens GN=FSCN1 PE=1 SV=3	55 kDa	0.341	12	12	0.335	12	12	0.359	13	13	0.278	10	10	0.241	9	9	0.361	12	12
83	PTBP1_HUMAN	Polypyrimidine tract-binding protein 1 OS=Homo sapiens GN=PTBP1 PE=1 SV=1	57 kDa	0.409	9	9	0.282	8	8	0.38	9	9	0.269	9	9	0.269	9	9	0.269	9	9
84	IF5A1_HUMAN	Eukaryotic translation initiation factor 5A-1 OS=Homo sapiens GN=EIF5A PE=1 SV=2	17 kDa	0.312	8	8	0.468	8	8	0.312	7	7	0.461	8	8	0.455	7	7	0.305	6	6
85	TCPG_HUMAN	T-complex protein 1 subunit gamma OS=Homo sapiens GN=CCT3 PE=1 SV=4	61 kDa	0.417	16	16	0.417	17	17	0.424	18	18	0.4	16	16	0.371	14	14	0.418	17	17
86	DHAK_HUMAN	Bifunctional ATP-dependent dihydroxyacetone kinase/FAD-AMP lyase (cyclizing) OS=Homo sapiens GN=DAK PE=1 SV=2	59 kDa	0.29	9	9	0.346	13	13	0.294	11	11	0.252	9	9	0.228	9	9	0.214	8	8
87	NB5R3_HUMAN	NADH-cytochrome b5 reductase 3 OS=Homo sapiens GN=CYB5R3 PE=1 SV=3	34 kDa	0.512	9	9	0.435	8	8	0.542	10	10	0.512	9	9	0.472	8	8	0.472	8	8
88	RL7_HUMAN	60S ribosomal protein L7 OS=Homo sapiens GN=RPL7 PE=1 SV=1	29 kDa	0.375	10	10	0.367	10	10	0.375	11	11	0.339	9	9	0.427	12	12	0.427	11	11
89	LMNA_HUMAN	Prelamin-A/C OS=Homo sapiens GN=LMNA PE=1 SV=1	74 kDa	0.324	19	19	0.241	15	15	0.255	15	15	0.327	19	19	0.312	18	18	0.273	16	16
90	GBLP_HUMAN	Guanine nucleotide-binding protein subunit beta-2-like 1 OS=Homo sapiens GN=GNB2L1 PE=1 SV=3	35 kDa	0.495	10	10	0.527	11	11	0.502	10	10	0.303	6	6	0.328	7	7	0.426	9	9
91	PUR9_HUMAN	Bifunctional purine biosynthesis protein PURH OS=Homo sapiens GN=ATIC PE=1 SV=3	65 kDa	0.348	15	15	0.378	16	16	0.333	14	14	0.387	16	16	0.356	15	15	0.377	16	16
92.1	TPM4_HUMAN	Tropomyosin alpha-4 chain OS=Homo sapiens GN=TPM4 PE=1 SV=3	29 kDa	0.319	7	3	0.315	6	3	0.315	6	3	0.464	10	5	0.512	12	7	0.512	11	6
92.2	TPM3_HUMAN	Tropomyosin alpha-3 chain OS=Homo sapiens GN=TPM3 PE=1 SV=1	33 kDa	0.254	8	3	0.254	7	3	0.225	6	2	0.292	9	3	0.338	10	4	0.299	9	3
92.3	TPM1_HUMAN	Tropomyosin alpha-1 chain OS=Homo sapiens GN=TPM1 PE=1 SV=2	33 kDa	0.109	5	1	0.106	4	1	0.081	3	0	0.169	6	1	0.155	6	1	0.155	6	1
93	TCPB_HUMAN	T-complex protein 1 subunit beta OS=Homo sapiens GN=CCT2 PE=1 SV=4	57 kDa	0.432	18	18	0.394	16	16	0.402	17	17	0.297	13	13	0.43	15	15	0.355	13	13
94	RS13_HUMAN	40S ribosomal protein S13 OS=Homo sapiens GN=RPS13 PE=1 SV=2	17 kDa	0.351	7	7	0.351	7	7	0.351	7	7	0.265	4	4	0.265	3	3	0.265	4	4
95	TKT_HUMAN	Transketolase OS=Homo sapiens GN=TKT PE=1 SV=3	68 kDa	0.262	13	13	0.291	14	14	0.289	13	13	0.27	12	12	0.305	12	12	0.305	12	12
96.1	RS4X_HUMAN	40S ribosomal protein S4, X isoform OS=Homo sapiens GN=RPS4X PE=1 SV=2	30 kDa	0.388	9	4	0.388	9	4	0.331	8	4	0.369	9	5	0.331	9	4	0.376	11	6
96.2	RS4Y1_HUMAN	40S ribosomal protein S4, Y isoform 1 OS=Homo sapiens GN=RPS4Y1 PE=2 SV=2	29 kDa	0.251	6	1	0.251	6	1	0.243	6	2	0.122	4	0	0.129	5	0	0.167	6	1
97	RL7A_HUMAN	60S ribosomal protein L7a OS=Homo sapiens GN=RPL7A PE=1 SV=2	30 kDa	0.414	14	14	0.383	13	13	0.383	13	13	0.447	15	15	0.451	15	15	0.444	13	13
98	DYHC1_HUMAN	Cytoplasmic dynein 1 heavy chain 1 OS=Homo sapiens GN=DYNC1H1 PE=1 SV=5	532 kDa	0.076	24	24	0.0618	20	20	0.0977	30	30	0.0622	19	19	0.0448	14	14	0.0517	16	16
99	RPN1_HUMAN	Dolichyl-diphosphooligosaccharide--protein glycosyltransferase subunit 1 OS=Homo sapiens GN=RPN1 PE=1 SV=1	69 kDa	0.354	16	16	0.333	15	15	0.367	15	15	0.329	15	15	0.321	15	15	0.348	15	15
100	1433E_HUMAN	14-3-3 protein epsilon OS=Homo sapiens GN=YWHAE PE=1 SV=1	29 kDa	0.561	11	9	0.561	12	10	0.561	13	11	0.529	13	11	0.494	12	10	0.529	13	11
101	SIAS_HUMAN	Sialic acid synthase OS=Homo sapiens GN=NANS PE=1 SV=2	40 kDa	0.078	2	2	0.106	3	3	0.178	4	4	0.212	5	5	0.078	2	2	0.159	4	4
102.1	PCBP1_HUMAN	Poly(rC)-binding protein 1 OS=Homo sapiens GN=PCBP1 PE=1 SV=2	37 kDa	0.646	11	9	0.478	9	7	0.615	10	8	0.522	10	7	0.435	9	6	0.486	10	8
102.2	PCBP2_HUMAN	Poly(rC)-binding protein 2 OS=Homo sapiens GN=PCBP2 PE=1 SV=1	39 kDa	0.351	7	4	0.381	8	5	0.381	8	5	0.34	8	4	0.34	8	4	0.351	7	4
102.3	PCBP3_HUMAN	Poly(rC)-binding protein 3 OS=Homo sapiens GN=PCBP3 PE=1 SV=2	39 kDa	0.121	3	0	0.121	3	0	0.154	4	1	0.175	5	1	0.143	4	0	0.154	4	1
103	VILI_HUMAN	Villin-1 OS=Homo sapiens GN=VIL1 PE=1 SV=4	93 kDa	0.335	20	20	0.34	19	19	0.308	18	18	0.277	17	16	0.258	15	14	0.267	15	15
104	DHX9_HUMAN	ATP-dependent RNA helicase A OS=Homo sapiens GN=DHX9 PE=1 SV=4	141 kDa	0.165	16	16	0.13	12	12	0.155	15	15	0.135	13	13	0.108	10	10	0.147	14	14
105	HYOU1_HUMAN	Hypoxia up-regulated protein 1 OS=Homo sapiens GN=HYOU1 PE=1 SV=1	111 kDa	0.207	11	11	0.173	10	10	0.257	15	15	0.317	20	20	0.286	17	17	0.323	20	20
106	AL1B1_HUMAN	Aldehyde dehydrogenase X, mitochondrial OS=Homo sapiens GN=ALDH1B1 PE=1 SV=3	57 kDa	0.327	12	11	0.269	10	8	0.346	12	11	0.466	20	18	0.42	18	17	0.379	16	15
107	EFTU_HUMAN	Elongation factor Tu, mitochondrial OS=Homo sapiens GN=TUFM PE=1 SV=2	50 kDa	0.341	10	10	0.341	11	11	0.327	10	10	0.498	18	18	0.372	14	14	0.35	13	13
108	ANXA6_HUMAN	Annexin A6 OS=Homo sapiens GN=ANXA6 PE=1 SV=3	76 kDa	0.278	13	13	0.299	15	15	0.297	14	14	0.351	17	17	0.33	16	16	0.342	17	17
109	PRKDC_HUMAN	DNA-dependent protein kinase catalytic subunit OS=Homo sapiens GN=PRKDC PE=1 SV=3	469 kDa	0.069	20	20	0.0601	18	18	0.0579	16	16	0.0867	27	27	0.0865	25	25	0.0855	25	25
110	CALM_HUMAN	Calmodulin OS=Homo sapiens GN=CALM1 PE=1 SV=2	17 kDa	0.322	4	4	0.322	4	4	0.322	4	4	0.47	5	5	0.47	5	5	0.47	5	5
111	LRC59_HUMAN	Leucine-rich repeat-containing protein 59 OS=Homo sapiens GN=LRRC59 PE=1 SV=1	35 kDa	0.248	6	6	0.397	8	8	0.365	7	7	0.446	10	10	0.397	9	9	0.397	9	9
112	EF1G_HUMAN	Elongation factor 1-gamma OS=Homo sapiens GN=EEF1G PE=1 SV=3	50 kDa	0.215	8	8	0.268	9	9	0.27	9	9	0.35	10	10	0.327	10	10	0.341	11	11
113	P5CS_HUMAN	Delta-1-pyrroline-5-carboxylate synthase OS=Homo sapiens GN=ALDH18A1 PE=1 SV=2	87 kDa	0.299	18	18	0.292	18	18	0.278	18	18	0.27	16	16	0.284	16	16	0.299	19	19
114	RS7_HUMAN	40S ribosomal protein S7 OS=Homo sapiens GN=RPS7 PE=1 SV=1	22 kDa	0.464	7	7	0.423	6	6	0.505	8	8	0.299	5	5	0.253	4	4	0.299	5	5
115	ECHB_HUMAN	Trifunctional enzyme subunit beta, mitochondrial OS=Homo sapiens GN=HADHB PE=1 SV=3	51 kDa	0.302	13	13	0.281	13	13	0.281	11	11	0.409	17	17	0.35	15	15	0.297	13	13
116.1	AT1A1_HUMAN	Sodium/potassium-transporting ATPase subunit alpha-1 OS=Homo sapiens GN=ATP1A1 PE=1 SV=1	113 kDa	0.223	19	13	0.244	20	14	0.228	19	13	0.227	18	12	0.144	11	8	0.167	13	10
116.2	AT12A_HUMAN	Potassium-transporting ATPase alpha chain 2 OS=Homo sapiens GN=ATP12A PE=2 SV=3	116 kDa	0	0	0	0	0	0	0.0289	3	0	0	0	0	0.0202	2	0	0	0	0
116.3	AT1A2_HUMAN	Sodium/potassium-transporting ATPase subunit alpha-2 OS=Homo sapiens GN=ATP1A2 PE=1 SV=1	112 kDa	0	0	0	0	0	0	0	0	0	0.0824	6	0	0	0	0	0	0	0
116.4	ATP4A_HUMAN	Potassium-transporting ATPase alpha chain 1 OS=Homo sapiens GN=ATP4A PE=2 SV=5	114 kDa	0	0	0	0	0	0	0	0	0	0	0	0	0.0203	2	0	0	0	0
117	ROA3_HUMAN	Heterogeneous nuclear ribonucleoprotein A3 OS=Homo sapiens GN=HNRNPA3 PE=1 SV=2	40 kDa	0.22	9	8	0.254	9	9	0.262	9	9	0.328	10	10	0.246	9	9	0.283	10	10
118	TCPD_HUMAN	T-complex protein 1 subunit delta OS=Homo sapiens GN=CCT4 PE=1 SV=4	58 kDa	0.334	13	12	0.297	11	10	0.269	10	9	0.336	14	13	0.336	14	13	0.358	14	13
119	IMB1_HUMAN	Importin subunit beta-1 OS=Homo sapiens GN=KPNB1 PE=1 SV=2	97 kDa	0.188	12	12	0.144	9	9	0.2	12	12	0.211	14	14	0.196	13	13	0.202	13	13
120	PRDX6_HUMAN	Peroxiredoxin-6 OS=Homo sapiens GN=PRDX6 PE=1 SV=3	25 kDa	0.46	7	7	0.478	9	9	0.554	9	9	0.554	10	10	0.554	11	11	0.554	10	10
121	6PGD_HUMAN	6-phosphogluconate dehydrogenase, decarboxylating OS=Homo sapiens GN=PGD PE=1 SV=3	53 kDa	0.346	13	13	0.346	12	12	0.369	14	14	0.323	13	13	0.383	15	15	0.342	14	14
122.1	HNRH1_HUMAN	Heterogeneous nuclear ribonucleoprotein H OS=Homo sapiens GN=HNRNPH1 PE=1 SV=4	49 kDa	0.258	8	3	0.278	8	3	0.252	8	2	0.296	8	3	0.252	7	2	0.281	8	3
122.2	HNRH2_HUMAN	Heterogeneous nuclear ribonucleoprotein H2 OS=Homo sapiens GN=HNRNPH2 PE=1 SV=1	49 kDa	0.167	5	1	0.167	5	1	0.185	6	1	0.167	5	1	0.214	6	2	0.167	5	1
123	GLYM_HUMAN	Serine hydroxymethyltransferase, mitochondrial OS=Homo sapiens GN=SHMT2 PE=1 SV=3	56 kDa	0.276	11	10	0.276	11	10	0.276	11	10	0.333	13	12	0.312	12	11	0.333	13	12
124	ILF3_HUMAN	Interleukin enhancer-binding factor 3 OS=Homo sapiens GN=ILF3 PE=1 SV=3	95 kDa	0.268	17	17	0.213	15	15	0.188	12	12	0.202	13	13	0.183	11	11	0.19	13	13
125	RS2_HUMAN	40S ribosomal protein S2 OS=Homo sapiens GN=RPS2 PE=1 SV=2	31 kDa	0.263	7	7	0.263	7	7	0.225	6	6	0.263	7	7	0.263	7	7	0.263	7	7
126	RL8_HUMAN	60S ribosomal protein L8 OS=Homo sapiens GN=RPL8 PE=1 SV=2	28 kDa	0.362	7	7	0.331	6	6	0.331	6	6	0.358	6	6	0.257	5	5	0.327	5	5
127	TALDO_HUMAN	Transaldolase OS=Homo sapiens GN=TALDO1 PE=1 SV=2	38 kDa	0.318	10	10	0.282	9	9	0.282	9	9	0.258	8	8	0.267	8	8	0.318	10	10
128	RS3A_HUMAN	40S ribosomal protein S3a OS=Homo sapiens GN=RPS3A PE=1 SV=2	30 kDa	0.273	7	7	0.322	8	8	0.292	8	8	0.261	6	6	0.261	6	6	0.292	7	7
129	RL10A_HUMAN	60S ribosomal protein L10a OS=Homo sapiens GN=RPL10A PE=1 SV=2	25 kDa	0.35	8	8	0.35	8	8	0.35	8	8	0.35	8	8	0.35	8	8	0.313	7	7
130	HYEP_HUMAN	Epoxide hydrolase 1 OS=Homo sapiens GN=EPHX1 PE=1 SV=1	53 kDa	0.404	12	12	0.385	11	11	0.385	11	11	0.332	8	8	0.332	8	8	0.288	7	7
131	HMGB1_HUMAN	High mobility group protein B1 OS=Homo sapiens GN=HMGB1 PE=1 SV=3	25 kDa	0.316	7	6	0.321	8	7	0.312	6	5	0.265	5	4	0.265	5	4	0.367	7	5
132	HNRPM_HUMAN	Heterogeneous nuclear ribonucleoprotein M OS=Homo sapiens GN=HNRNPM PE=1 SV=3	78 kDa	0.24	10	10	0.268	12	12	0.273	12	12	0.179	8	8	0.207	10	10	0.262	12	12
133	CLIC1_HUMAN	Chloride intracellular channel protein 1 OS=Homo sapiens GN=CLIC1 PE=1 SV=4	27 kDa	0.274	6	6	0.477	8	8	0.386	7	7	0.523	9	9	0.56	10	10	0.56	10	10
134	IDHP_HUMAN	Isocitrate dehydrogenase [NADP], mitochondrial OS=Homo sapiens GN=IDH2 PE=1 SV=2	51 kDa	0.248	9	8	0.319	11	10	0.356	12	11	0.35	13	12	0.261	10	9	0.314	11	10
135	CISY_HUMAN	Citrate synthase, mitochondrial OS=Homo sapiens GN=CS PE=1 SV=2	52 kDa	0.365	12	12	0.232	8	8	0.365	12	12	0.258	9	9	0.258	9	9	0.303	12	12
136	ADRO_HUMAN	NADPH:adrenodoxin oxidoreductase, mitochondrial OS=Homo sapiens GN=FDXR PE=1 SV=3	54 kDa	0.322	10	10	0.312	10	10	0.295	9	9	0.399	14	14	0.403	14	14	0.475	17	17
137	ECHM_HUMAN	Enoyl-CoA hydratase, mitochondrial OS=Homo sapiens GN=ECHS1 PE=1 SV=4	31 kDa	0.369	8	8	0.29	7	7	0.331	6	6	0.352	8	8	0.345	7	7	0.314	6	6
138	SYG_HUMAN	Glycine--tRNA ligase OS=Homo sapiens GN=GARS PE=1 SV=3	83 kDa	0.191	9	9	0.142	6	6	0.248	12	12	0.286	14	14	0.233	12	12	0.279	13	13
139	EMAL4_HUMAN	Echinoderm microtubule-associated protein-like 4 OS=Homo sapiens GN=EML4 PE=1 SV=3	109 kDa	0.209	12	12	0.174	10	10	0.226	14	14	0.222	16	16	0.207	15	15	0.229	18	18
140.1	DX39B_HUMAN	Spliceosome RNA helicase DDX39B OS=Homo sapiens GN=DDX39B PE=1 SV=1	49 kDa	0.308	10	3	0.308	10	3	0.29	9	3	0.36	12	3	0.341	11	3	0.341	11	3
140.2	DX39A_HUMAN	ATP-dependent RNA helicase DDX39A OS=Homo sapiens GN=DDX39A PE=1 SV=2	49 kDa	0.244	8	1	0.244	8	1	0.225	7	1	0.267	9	0	0.248	8	0	0.248	8	0
141.1	MYH9_HUMAN	Myosin-9 OS=Homo sapiens GN=MYH9 PE=1 SV=4	227 kDa	0.2	26	19	0.169	23	17	0.178	23	18	0.0929	12	9	0.0847	10	7	0.0459	6	4
141.2	MYH11_HUMAN	Myosin-11 OS=Homo sapiens GN=MYH11 PE=1 SV=3	227 kDa	0.0218	3	0	0.0132	2	0	0.0132	2	0	0.0162	2	0	0.00761	1	0	0.00761	1	0
142	SERA_HUMAN	D-3-phosphoglycerate dehydrogenase OS=Homo sapiens GN=PHGDH PE=1 SV=4	57 kDa	0.235	9	9	0.257	10	10	0.235	9	9	0.338	15	15	0.298	13	13	0.295	12	12
143.1	TLN1_HUMAN	Talin-1 OS=Homo sapiens GN=TLN1 PE=1 SV=3	270 kDa	0.107	17	16	0.101	16	14	0.116	17	15	0.117	18	17	0.123	20	18	0.115	18	17
143.2	TLN2_HUMAN	Talin-2 OS=Homo sapiens GN=TLN2 PE=1 SV=4	272 kDa	0	0	0	0.00865	2	0	0	0	0	0.00433	1	0	0	0	0	0.00433	1	0
144	PHB2_HUMAN	Prohibitin-2 OS=Homo sapiens GN=PHB2 PE=1 SV=2	33 kDa	0.361	9	9	0.247	6	6	0.391	9	9	0.388	10	10	0.361	9	9	0.452	11	11
145	RAN_HUMAN	GTP-binding nuclear protein Ran OS=Homo sapiens GN=RAN PE=1 SV=3	24 kDa	0.292	6	6	0.292	6	6	0.375	7	7	0.356	6	6	0.273	5	5	0.273	5	5
146	TCPQ_HUMAN	T-complex protein 1 subunit theta OS=Homo sapiens GN=CCT8 PE=1 SV=4	60 kDa	0.427	20	20	0.409	18	18	0.398	19	19	0.316	14	14	0.343	15	15	0.308	13	13
147.1	RAB10_HUMAN	Ras-related protein Rab-10 OS=Homo sapiens GN=RAB10 PE=1 SV=1	23 kDa	0.345	5	3	0.215	4	2	0.165	3	1	0.395	6	4	0.275	5	3	0.275	5	3
147.1	RAB4B_HUMAN	Ras-related protein Rab-4B OS=Homo sapiens GN=RAB4B PE=1 SV=1	24 kDa	0	0	0	0	0	0	0	0	0	0	0	0	0	0	0	0	0	0
147.2	RAB14_HUMAN	Ras-related protein Rab-14 OS=Homo sapiens GN=RAB14 PE=1 SV=4	24 kDa	0.256	3	2	0.191	2	1	0.191	2	1	0.256	3	2	0.256	3	2	0.256	3	2
147.3	RAB1B_HUMAN	Ras-related protein Rab-1B OS=Homo sapiens GN=RAB1B PE=1 SV=1	22 kDa	0.264	4	1	0.343	5	1	0.264	4	1	0.303	5	1	0.229	4	0	0.229	4	0
147.4	RAB35_HUMAN	Ras-related protein Rab-35 OS=Homo sapiens GN=RAB35 PE=1 SV=1	23 kDa	0.179	3	1	0	0	0	0.179	3	1	0.179	3	1	0.179	3	1	0	0	0
147.5	RAB8A_HUMAN	Ras-related protein Rab-8A OS=Homo sapiens GN=RAB8A PE=1 SV=1	24 kDa	0.145	3	1	0.164	3	1	0.106	2	0	0.106	2	0	0.106	2	0	0.106	2	0
147.6	RAB1A_HUMAN	Ras-related protein Rab-1A OS=Homo sapiens GN=RAB1A PE=1 SV=3	23 kDa	0.185	3	0	0.346	5	1	0.185	3	0	0.224	4	0	0.224	4	0	0.224	4	0
147.7	RAB12_HUMAN	Ras-related protein Rab-12 OS=Homo sapiens GN=RAB12 PE=1 SV=3	27 kDa	0	0	0	0	0	0	0.0451	1	0	0	0	0	0	0	0	0	0	0
147.8	RAB3D_HUMAN	Ras-related protein Rab-3D OS=Homo sapiens GN=RAB3D PE=1 SV=1	24 kDa	0	0	0	0.0502	1	0	0	0	0	0	0	0	0	0	0	0	0	0
147.9	RAB13_HUMAN	Ras-related protein Rab-13 OS=Homo sapiens GN=RAB13 PE=1 SV=1	23 kDa	0	0	0	0	0	0	0	0	0	0	0	0	0	0	0	0	0	0
148	TXND5_HUMAN	Thioredoxin domain-containing protein 5 OS=Homo sapiens GN=TXNDC5 PE=1 SV=2	48 kDa	0.345	11	11	0.326	11	11	0.301	10	10	0.301	11	11	0.299	10	10	0.299	11	11
149	RS5_HUMAN	40S ribosomal protein S5 OS=Homo sapiens GN=RPS5 PE=1 SV=4	23 kDa	0.235	5	5	0.186	4	4	0.181	3	3	0.186	3	3	0.23	4	4	0.23	4	4
150	HNRPL_HUMAN	Heterogeneous nuclear ribonucleoprotein L OS=Homo sapiens GN=HNRNPL PE=1 SV=2	64 kDa	0.265	8	8	0.301	10	10	0.26	10	10	0.25	9	9	0.277	8	8	0.323	12	12
151	UBA1_HUMAN	Ubiquitin-like modifier-activating enzyme 1 OS=Homo sapiens GN=UBA1 PE=1 SV=3	118 kDa	0.231	16	16	0.215	16	16	0.237	16	16	0.24	16	16	0.17	12	12	0.159	11	11
152	VDAC1_HUMAN	Voltage-dependent anion-selective channel protein 1 OS=Homo sapiens GN=VDAC1 PE=1 SV=2	31 kDa	0.413	10	9	0.413	9	8	0.385	8	7	0.452	10	9	0.452	10	9	0.385	9	8
153	RL6_HUMAN	60S ribosomal protein L6 OS=Homo sapiens GN=RPL6 PE=1 SV=3	33 kDa	0.354	12	12	0.302	8	8	0.354	11	11	0.302	8	8	0.302	8	8	0.354	9	9
154	RLA2_HUMAN	60S acidic ribosomal protein P2 OS=Homo sapiens GN=RPLP2 PE=1 SV=1	12 kDa	0.739	6	6	0.417	4	4	0.739	6	6	0.704	5	5	0.704	5	5	0.704	5	5
155	GTR1_HUMAN	Solute carrier family 2, facilitated glucose transporter member 1 OS=Homo sapiens GN=SLC2A1 PE=1 SV=2	54 kDa	0.0752	4	4	0.124	5	5	0.124	5	5	0.148	8	8	0.148	7	7	0.148	7	7
156	SYEP_HUMAN	Bifunctional glutamate/proline--tRNA ligase OS=Homo sapiens GN=EPRS PE=1 SV=5	171 kDa	0.144	15	15	0.149	15	15	0.165	16	16	0.164	15	15	0.146	14	14	0.145	14	14
157	GLSK_HUMAN	Glutaminase kidney isoform, mitochondrial OS=Homo sapiens GN=GLS PE=1 SV=1	73 kDa	0.196	8	8	0.23	11	11	0.229	10	10	0.22	10	10	0.199	10	10	0.257	12	12
158	RS19_HUMAN	40S ribosomal protein S19 OS=Homo sapiens GN=RPS19 PE=1 SV=2	16 kDa	0.303	5	5	0.297	4	4	0.303	5	5	0.303	6	6	0.31	6	6	0.379	6	6
159	HNRPC_HUMAN	Heterogeneous nuclear ribonucleoproteins C1/C2 OS=Homo sapiens GN=HNRNPC PE=1 SV=4	34 kDa	0.239	8	8	0.203	8	8	0.229	8	8	0.212	9	9	0.212	8	8	0.212	9	9
160	COPA_HUMAN	Coatomer subunit alpha OS=Homo sapiens GN=COPA PE=1 SV=2	138 kDa	0.205	16	16	0.143	11	11	0.249	19	19	0.176	13	13	0.143	12	12	0.128	10	10
161	4F2_HUMAN	4F2 cell-surface antigen heavy chain OS=Homo sapiens GN=SLC3A2 PE=1 SV=3	68 kDa	0.186	9	9	0.235	10	10	0.194	8	8	0.294	16	16	0.308	17	17	0.3	17	17
162	RS9_HUMAN	40S ribosomal protein S9 OS=Homo sapiens GN=RPS9 PE=1 SV=3	23 kDa	0.304	9	9	0.304	9	9	0.263	8	8	0.304	9	9	0.304	9	9	0.34	9	9
163.1	RL3_HUMAN	60S ribosomal protein L3 OS=Homo sapiens GN=RPL3 PE=1 SV=2	46 kDa	0.27	10	9	0.285	10	9	0.34	12	11	0.226	8	7	0.246	8	7	0.203	7	6
163.2	RL3L_HUMAN	60S ribosomal protein L3-like OS=Homo sapiens GN=RPL3L PE=1 SV=3	46 kDa	0	0	0	0	0	0	0	0	0	0.0663	2	1	0	0	0	0.0663	2	1
164	MATR3_HUMAN	Matrin-3 OS=Homo sapiens GN=MATR3 PE=1 SV=2	95 kDa	0.196	10	10	0.236	12	12	0.256	13	13	0.184	11	11	0.157	8	8	0.172	9	9
165	RS3_HUMAN	40S ribosomal protein S3 OS=Homo sapiens GN=RPS3 PE=1 SV=2	27 kDa	0.568	12	12	0.568	11	11	0.568	11	11	0.576	12	12	0.457	10	10	0.613	14	14
166	SFPQ_HUMAN	Splicing factor, proline- and glutamine-rich OS=Homo sapiens GN=SFPQ PE=1 SV=2	76 kDa	0.168	9	8	0.164	9	8	0.195	11	10	0.122	7	6	0.134	7	6	0.153	8	7
167	DHB4_HUMAN	Peroxisomal multifunctional enzyme type 2 OS=Homo sapiens GN=HSD17B4 PE=1 SV=3	80 kDa	0.219	13	13	0.255	14	14	0.216	10	10	0.279	13	13	0.321	16	16	0.31	15	15
168	AATC_HUMAN	Aspartate aminotransferase, cytoplasmic OS=Homo sapiens GN=GOT1 PE=1 SV=3	46 kDa	0.329	9	9	0.351	10	10	0.409	11	11	0.431	12	12	0.516	14	14	0.429	12	12
169	GANAB_HUMAN	Neutral alpha-glucosidase AB OS=Homo sapiens GN=GANAB PE=1 SV=3	107 kDa	0.159	9	9	0.169	10	10	0.212	13	13	0.23	12	12	0.207	12	12	0.204	12	12
170	TCPA_HUMAN	T-complex protein 1 subunit alpha OS=Homo sapiens GN=TCP1 PE=1 SV=1	60 kDa	0.311	13	13	0.257	11	11	0.257	11	11	0.225	10	10	0.259	11	11	0.259	11	11
171	TCPE_HUMAN	T-complex protein 1 subunit epsilon OS=Homo sapiens GN=CCT5 PE=1 SV=1	60 kDa	0.364	12	11	0.24	10	9	0.364	13	12	0.353	13	12	0.333	12	11	0.298	10	9
172.1	RS10_HUMAN	40S ribosomal protein S10 OS=Homo sapiens GN=RPS10 PE=1 SV=1	19 kDa	0.333	4	2	0.333	4	2	0.145	2	2	0.2	3	2	0.145	2	2	0.145	2	2
172.2	RS10L_HUMAN	Putative 40S ribosomal protein S10-like OS=Homo sapiens GN=RPS10P5 PE=5 SV=1	20 kDa	0.176	2	0	0.176	2	0	0	0	0	0.0511	1	0	0	0	0	0	0	0
173.1	ALDH2_HUMAN	Aldehyde dehydrogenase, mitochondrial OS=Homo sapiens GN=ALDH2 PE=1 SV=2	56 kDa	0.232	9	7	0.166	8	5	0.3	12	10	0.338	15	12	0.321	12	11	0.323	12	11
173.2	AL1A2_HUMAN	Retinal dehydrogenase 2 OS=Homo sapiens GN=ALDH1A2 PE=1 SV=3	57 kDa	0.0154	1	0	0.0174	2	0	0.0154	1	0	0.0328	3	0	0.0154	1	0	0.0154	1	0
174	SYAC_HUMAN	Alanine--tRNA ligase, cytoplasmic OS=Homo sapiens GN=AARS PE=1 SV=2	107 kDa	0.0661	4	4	0.131	9	9	0.0579	4	4	0.194	13	13	0.178	13	13	0.212	14	14
175	H2B2C_HUMAN (+1)	Putative histone H2B type 2-C OS=Homo sapiens GN=HIST2H2BC PE=5 SV=3	21 kDa	0.0518	2	2	0.0518	2	2	0.0518	2	2	0.0518	2	2	0.0518	2	2	0.0518	2	2
176	CATD_HUMAN	Cathepsin D OS=Homo sapiens GN=CTSD PE=1 SV=1	45 kDa	0.316	10	10	0.252	8	8	0.235	8	8	0.184	6	6	0.158	5	5	0.231	8	8
177	PARK7_HUMAN	Protein DJ-1 OS=Homo sapiens GN=PARK7 PE=1 SV=2	20 kDa	0.471	5	5	0.508	6	6	0.55	7	7	0.545	7	7	0.423	5	5	0.545	6	6
178	RS11_HUMAN	40S ribosomal protein S11 OS=Homo sapiens GN=RPS11 PE=1 SV=3	18 kDa	0.468	7	7	0.367	5	5	0.418	6	6	0.354	5	5	0.354	5	5	0.354	5	5
179	TRFE_HUMAN	Serotransferrin OS=Homo sapiens GN=TF PE=1 SV=3	77 kDa	0.238	11	11	0.269	14	14	0.289	14	14	0.0272	1	1	0.0272	1	1	0.0272	1	1
180.1	TCPZ_HUMAN	T-complex protein 1 subunit zeta OS=Homo sapiens GN=CCT6A PE=1 SV=3	58 kDa	0.269	10	8	0.288	10	8	0.309	11	9	0.303	10	9	0.264	9	8	0.245	8	8
180.2	TCPW_HUMAN	T-complex protein 1 subunit zeta-2 OS=Homo sapiens GN=CCT6B PE=1 SV=5	58 kDa	0.066	2	0	0.066	2	0	0	0	0	0	0	0	0	0	0	0.0226	0	0
181.1	PABP1_HUMAN	Polyadenylate-binding protein 1 OS=Homo sapiens GN=PABPC1 PE=1 SV=2	71 kDa	0.214	10	0	0.252	12	2	0.289	14	3	0.173	8	0	0.14	7	2	0.241	11	2
181.2	PABP4_HUMAN	Polyadenylate-binding protein 4 OS=Homo sapiens GN=PABPC4 PE=1 SV=1	71 kDa	0.143	6	3	0.121	5	2	0.143	6	3	0.0963	4	1	0.0481	2	1	0.0963	4	1
181.3	PABP3_HUMAN	Polyadenylate-binding protein 3 OS=Homo sapiens GN=PABPC3 PE=1 SV=2	70 kDa	0.158	7	0	0.158	7	0	0.158	7	0	0.132	6	0	0.0792	4	0	0.158	7	0
181.4	PAP1L_HUMAN	Polyadenylate-binding protein 1-like OS=Homo sapiens GN=PABPC1L PE=2 SV=1	68 kDa	0.057	3	0	0.057	3	0	0.0717	4	0	0	0	0	0.0179	1	0	0	0	0
182	MDHC_HUMAN	Malate dehydrogenase, cytoplasmic OS=Homo sapiens GN=MDH1 PE=1 SV=4	36 kDa	0.296	7	7	0.32	8	8	0.296	7	7	0.296	7	7	0.266	6	6	0.296	7	7
183	PHB_HUMAN	Prohibitin OS=Homo sapiens GN=PHB PE=1 SV=1	30 kDa	0.39	8	8	0.423	9	9	0.445	9	9	0.529	12	12	0.489	11	11	0.438	10	10
184	LA_HUMAN	Lupus La protein OS=Homo sapiens GN=SSB PE=1 SV=2	47 kDa	0.287	8	8	0.27	8	8	0.287	8	8	0.262	8	8	0.218	7	7	0.25	8	8
185.1	GFPT1_HUMAN	Glucosamine--fructose-6-phosphate aminotransferase [isomerizing] 1 OS=Homo sapiens GN=GFPT1 PE=1 SV=3	79 kDa	0.109	5	5	0.155	7	6	0.133	7	6	0.272	15	12	0.227	12	10	0.187	10	9
185.2	GFPT2_HUMAN	Glucosamine--fructose-6-phosphate aminotransferase [isomerizing] 2 OS=Homo sapiens GN=GFPT2 PE=1 SV=3	77 kDa	0.0132	1	1	0.0264	2	1	0.0264	2	1	0.088	4	1	0.0557	3	1	0.0425	2	1
186	1433Z_HUMAN	14-3-3 protein zeta/delta OS=Homo sapiens GN=YWHAZ PE=1 SV=1	28 kDa	0.429	8	6	0.453	9	7	0.429	8	6	0.461	9	7	0.429	8	6	0.429	8	6
187	RL17_HUMAN	60S ribosomal protein L17 OS=Homo sapiens GN=RPL17 PE=1 SV=3	21 kDa	0.337	6	6	0.386	8	8	0.288	6	6	0.37	7	7	0.424	8	8	0.37	7	7
188	RPN2_HUMAN	Dolichyl-diphosphooligosaccharide--protein glycosyltransferase subunit 2 OS=Homo sapiens GN=RPN2 PE=1 SV=3	69 kDa	0.19	7	7	0.125	4	4	0.125	4	4	0.189	8	8	0.176	7	7	0.204	8	8
189	AATM_HUMAN	Aspartate aminotransferase, mitochondrial OS=Homo sapiens GN=GOT2 PE=1 SV=3	48 kDa	0.251	7	7	0.233	6	6	0.26	7	7	0.337	10	10	0.23	7	7	0.337	10	10
190	CTNB1_HUMAN	Catenin beta-1 OS=Homo sapiens GN=CTNNB1 PE=1 SV=1	85 kDa	0.173	10	8	0.12	6	5	0.16	9	8	0.16	9	8	0.175	10	9	0.183	10	9
191	RL5_HUMAN	60S ribosomal protein L5 OS=Homo sapiens GN=RPL5 PE=1 SV=3	34 kDa	0.273	7	7	0.273	8	8	0.273	7	7	0.246	7	7	0.242	6	6	0.246	7	7
192	TEBP_HUMAN	Prostaglandin E synthase 3 OS=Homo sapiens GN=PTGES3 PE=1 SV=1	19 kDa	0.188	2	2	0.188	2	2	0.188	2	2	0.262	3	3	0.188	2	2	0.262	3	3
193	THIO_HUMAN	Thioredoxin OS=Homo sapiens GN=TXN PE=1 SV=3	12 kDa	0.343	4	4	0.429	5	5	0.343	3	3	0.429	5	5	0.429	5	5	0.429	5	5
194	RLA0_HUMAN	60S acidic ribosomal protein P0 OS=Homo sapiens GN=RPLP0 PE=1 SV=1	34 kDa	0.407	9	9	0.379	8	8	0.366	9	9	0.274	5	5	0.309	6	6	0.319	6	6
195	TCPH_HUMAN	T-complex protein 1 subunit eta OS=Homo sapiens GN=CCT7 PE=1 SV=2	59 kDa	0.304	11	11	0.269	11	11	0.223	9	9	0.313	10	10	0.269	9	9	0.228	8	8
196	ETFA_HUMAN	Electron transfer flavoprotein subunit alpha, mitochondrial OS=Homo sapiens GN=ETFA PE=1 SV=1	35 kDa	0.369	9	9	0.321	8	8	0.321	8	8	0.378	9	9	0.378	9	9	0.321	8	8
197	HSP74_HUMAN	Heat shock 70 kDa protein 4 OS=Homo sapiens GN=HSPA4 PE=1 SV=4	94 kDa	0.179	11	10	0.212	13	12	0.183	11	10	0.199	12	11	0.165	10	9	0.181	10	9
198	PDLI1_HUMAN	PDZ and LIM domain protein 1 OS=Homo sapiens GN=PDLIM1 PE=1 SV=4	36 kDa	0.432	8	8	0.529	9	9	0.505	10	10	0.371	6	6	0.319	5	5	0.237	4	4
199	MIF_HUMAN	Macrophage migration inhibitory factor OS=Homo sapiens GN=MIF PE=1 SV=4	12 kDa	0.174	2	2	0.357	3	3	0.835	4	4	0.357	3	3	0.174	2	2	0.357	3	3
200	RL12_HUMAN	60S ribosomal protein L12 OS=Homo sapiens GN=RPL12 PE=1 SV=1	18 kDa	0.545	6	6	0.545	6	6	0.545	6	6	0.545	6	6	0.545	6	6	0.545	6	6
201	ST1A3_HUMAN	Sulfotransferase 1A3/1A4 OS=Homo sapiens GN=SULT1A3 PE=1 SV=1	34 kDa	0.519	9	6	0.586	10	7	0.597	12	7	0.593	11	6	0.519	10	7	0.59	12	6
202.1	RL10_HUMAN	60S ribosomal protein L10 OS=Homo sapiens GN=RPL10 PE=1 SV=4	25 kDa	0.332	6	4	0.332	6	4	0.29	5	3	0.388	8	5	0.388	8	5	0.388	7	4
202.2	RL10L_HUMAN	60S ribosomal protein L10-like OS=Homo sapiens GN=RPL10L PE=1 SV=3	25 kDa	0.0888	2	0	0	0	0	0.0888	2	0	0	0	0	0.145	3	0	0	0	0
203.1	DDX3X_HUMAN	ATP-dependent RNA helicase DDX3X OS=Homo sapiens GN=DDX3X PE=1 SV=3	73 kDa	0.166	8	3	0.178	8	1	0.159	7	2	0.153	7	1	0.116	6	1	0.207	9	2
203.2	DDX3Y_HUMAN	ATP-dependent RNA helicase DDX3Y OS=Homo sapiens GN=DDX3Y PE=1 SV=2	73 kDa	0	0	0	0	0	0	0	0	0	0	0	0	0	0	0	0	0	0
204	U520_HUMAN	U5 small nuclear ribonucleoprotein 200 kDa helicase OS=Homo sapiens GN=SNRNP200 PE=1 SV=2	245 kDa	0.133	16	16	0.0716	10	10	0.073	10	10	0.0679	8	8	0.0309	4	4	0.0445	6	6
205.1	2AAA_HUMAN	Serine/threonine-protein phosphatase 2A 65 kDa regulatory subunit A alpha isoform OS=Homo sapiens GN=PPP2R1A PE=1 SV=4	65 kDa	0.25	9	7	0.28	11	9	0.28	11	9	0.26	10	9	0.168	7	6	0.209	8	7
205.2	2AAB_HUMAN	Serine/threonine-protein phosphatase 2A 65 kDa regulatory subunit A beta isoform OS=Homo sapiens GN=PPP2R1B PE=1 SV=3	66 kDa	0	0	0	0	0	0	0	0	0	0	0	0	0	0	0	0.03	1	0
206.1	EZRI_HUMAN	Ezrin OS=Homo sapiens GN=EZR PE=1 SV=4	69 kDa	0.177	11	6	0.174	10	4	0.16	9	4	0.217	13	8	0.164	10	5	0.155	9	4
206.2	RADI_HUMAN	Radixin OS=Homo sapiens GN=RDX PE=1 SV=1	69 kDa	0.0497	4	0	0.0652	5	0	0.0497	4	0	0.0858	6	1	0.13	7	2	0.084	5	1
206.3	MOES_HUMAN	Moesin OS=Homo sapiens GN=MSN PE=1 SV=3	68 kDa	0	0	0	0	0	0	0	0	0	0	0	0	0	0	0	0	0	0
207	IPO5_HUMAN	Importin-5 OS=Homo sapiens GN=IPO5 PE=1 SV=4	124 kDa	0.179	12	12	0.18	12	12	0.179	12	12	0.18	12	11	0.15	11	10	0.164	11	10
208	PRDX3_HUMAN	Thioredoxin-dependent peroxide reductase, mitochondrial OS=Homo sapiens GN=PRDX3 PE=1 SV=3	28 kDa	0.367	7	7	0.367	7	7	0.367	7	7	0.363	6	6	0.363	6	6	0.363	6	6
209	RS12_HUMAN	40S ribosomal protein S12 OS=Homo sapiens GN=RPS12 PE=1 SV=3	15 kDa	0.455	5	5	0.455	5	5	0.455	5	5	0.386	4	4	0.326	3	3	0.386	4	4
210	RSSA_HUMAN	40S ribosomal protein SA OS=Homo sapiens GN=RPSA PE=1 SV=4	33 kDa	0.363	9	9	0.363	9	9	0.363	9	9	0.302	7	7	0.166	5	5	0.353	7	7
211	ACOX1_HUMAN	Peroxisomal acyl-coenzyme A oxidase 1 OS=Homo sapiens GN=ACOX1 PE=1 SV=3	74 kDa	0.195	7	7	0.195	8	8	0.171	6	6	0.256	11	11	0.218	9	9	0.189	8	8
212	DESP_HUMAN	Desmoplakin OS=Homo sapiens GN=DSP PE=1 SV=3	332 kDa	0.062	12	12	0.0623	12	12	0.0669	14	14	0.0731	13	13	0.0495	9	9	0.0272	5	5
213	IF2B1_HUMAN	Insulin-like growth factor 2 mRNA-binding protein 1 OS=Homo sapiens GN=IGF2BP1 PE=1 SV=2	63 kDa	0.203	9	8	0.236	11	10	0.229	10	9	0.218	10	8	0.218	10	8	0.237	10	9
214	SERC_HUMAN	Phosphoserine aminotransferase OS=Homo sapiens GN=PSAT1 PE=1 SV=2	40 kDa	0.227	8	8	0.281	9	9	0.305	10	10	0.384	11	11	0.373	12	12	0.373	11	11
215	ETFB_HUMAN	Electron transfer flavoprotein subunit beta OS=Homo sapiens GN=ETFB PE=1 SV=3	28 kDa	0.361	8	8	0.412	10	10	0.404	10	10	0.384	11	11	0.482	12	12	0.38	9	9
216	NIPS1_HUMAN	Protein NipSnap homolog 1 OS=Homo sapiens GN=NIPSNAP1 PE=1 SV=1	33 kDa	0.239	4	4	0.187	3	3	0.19	3	3	0.222	5	5	0.218	4	4	0.271	6	6
217	AL4A1_HUMAN	Delta-1-pyrroline-5-carboxylate dehydrogenase, mitochondrial OS=Homo sapiens GN=ALDH4A1 PE=1 SV=3	62 kDa	0.151	6	6	0.124	5	5	0.151	6	6	0.336	12	12	0.222	9	9	0.185	7	7
218	RL18_HUMAN	60S ribosomal protein L18 OS=Homo sapiens GN=RPL18 PE=1 SV=2	22 kDa	0.309	5	5	0.309	5	5	0.309	5	5	0.25	4	4	0.309	5	5	0.309	5	5
219	P5CR1_HUMAN	Pyrroline-5-carboxylate reductase 1, mitochondrial OS=Homo sapiens GN=PYCR1 PE=1 SV=2	33 kDa	0.273	5	5	0.367	7	7	0.37	7	7	0.408	8	7	0.401	8	7	0.367	7	7
220	PARP1_HUMAN	Poly [ADP-ribose] polymerase 1 OS=Homo sapiens GN=PARP1 PE=1 SV=4	113 kDa	0.143	9	9	0.158	11	11	0.19	12	12	0.179	12	12	0.104	7	7	0.128	8	8
221	RS8_HUMAN	40S ribosomal protein S8 OS=Homo sapiens GN=RPS8 PE=1 SV=2	24 kDa	0.375	6	6	0.375	6	6	0.375	6	6	0.418	7	7	0.361	6	6	0.418	7	7
222	WDR1_HUMAN	WD repeat-containing protein 1 OS=Homo sapiens GN=WDR1 PE=1 SV=4	66 kDa	0.183	6	6	0.17	5	5	0.157	5	5	0.251	8	8	0.215	7	7	0.196	7	7
223	C1QBP_HUMAN	Complement component 1 Q subcomponent-binding protein, mitochondrial OS=Homo sapiens GN=C1QBP PE=1 SV=1	31 kDa	0.238	4	4	0.238	4	4	0.238	4	4	0.216	3	3	0.216	3	3	0.216	3	3
224	EIF3A_HUMAN	Eukaryotic translation initiation factor 3 subunit A OS=Homo sapiens GN=EIF3A PE=1 SV=1	167 kDa	0.111	12	12	0.14	14	14	0.127	13	13	0.0847	8	8	0.068	7	7	0.119	12	12
225	IMMT_HUMAN	Mitochondrial inner membrane protein OS=Homo sapiens GN=IMMT PE=1 SV=1	84 kDa	0.104	5	5	0.0515	4	4	0.0686	3	3	0.132	6	6	0.174	8	8	0.168	7	7
226	PAIRB_HUMAN	Plasminogen activator inhibitor 1 RNA-binding protein OS=Homo sapiens GN=SERBP1 PE=1 SV=2	45 kDa	0.194	6	6	0.243	6	6	0.23	8	8	0.169	4	4	0.12	3	3	0.211	6	6
227	PRDX5_HUMAN	Peroxiredoxin-5, mitochondrial OS=Homo sapiens GN=PRDX5 PE=1 SV=4	22 kDa	0.505	7	7	0.421	6	6	0.43	7	7	0.551	8	8	0.551	8	8	0.5	8	8
228	RL27_HUMAN	60S ribosomal protein L27 OS=Homo sapiens GN=RPL27 PE=1 SV=2	16 kDa	0.434	6	6	0.426	6	6	0.397	5	5	0.434	5	5	0.375	4	4	0.382	5	5
229	IMDH2_HUMAN	Inosine-5'-monophosphate dehydrogenase 2 OS=Homo sapiens GN=IMPDH2 PE=1 SV=2	56 kDa	0.195	8	8	0.263	9	9	0.233	8	8	0.255	10	10	0.28	11	11	0.247	10	10
230.1	PP1A_HUMAN	Serine/threonine-protein phosphatase PP1-alpha catalytic subunit OS=Homo sapiens GN=PPP1CA PE=1 SV=1	38 kDa	0.358	8	2	0.209	6	2	0.409	8	2	0.391	8	3	0.255	6	1	0.358	8	2
230.2	PP1B_HUMAN	Serine/threonine-protein phosphatase PP1-beta catalytic subunit OS=Homo sapiens GN=PPP1CB PE=1 SV=3	37 kDa	0.318	7	1	0.141	4	0	0.37	7	1	0.324	6	1	0.214	5	0	0.318	7	1
231.1	YBOX1_HUMAN	Nuclease-sensitive element-binding protein 1 OS=Homo sapiens GN=YBX1 PE=1 SV=3	36 kDa	0.37	6	4	0.29	5	3	0.29	5	3	0.275	6	4	0.198	3	2	0.281	6	5
231.2	DBPA_HUMAN	DNA-binding protein A OS=Homo sapiens GN=CSDA PE=1 SV=4	40 kDa	0.043	2	0	0.11	3	1	0.11	3	1	0.11	3	1	0	0	0	0.108	2	1
232	ACBP_HUMAN	Acyl-CoA-binding protein OS=Homo sapiens GN=DBI PE=1 SV=2	10 kDa	0.655	5	5	0.655	5	5	0.655	5	5	0.506	3	3	0.621	4	4	0.414	2	2
233	ACDSB_HUMAN	Short/branched chain specific acyl-CoA dehydrogenase, mitochondrial OS=Homo sapiens GN=ACADSB PE=1 SV=1	47 kDa	0.109	3	3	0.134	4	4	0.215	6	6	0.134	4	4	0.134	4	4	0.141	4	4
234	RS20_HUMAN	40S ribosomal protein S20 OS=Homo sapiens GN=RPS20 PE=1 SV=1	13 kDa	0.235	4	4	0.235	4	4	0.235	4	4	0.227	3	3	0.227	3	3	0.227	3	3
235	CATB_HUMAN	Cathepsin B OS=Homo sapiens GN=CTSB PE=1 SV=3	38 kDa	0.254	7	7	0.189	5	5	0.221	6	6	0.192	5	5	0.198	4	4	0.23	6	6
236	TMEDA_HUMAN	Transmembrane emp24 domain-containing protein 10 OS=Homo sapiens GN=TMED10 PE=1 SV=2	25 kDa	0.247	5	5	0.247	5	5	0.247	5	5	0.224	4	4	0.224	4	4	0.224	4	4
237	ALBU_HUMAN	Serum albumin OS=Homo sapiens GN=ALB PE=1 SV=2	69 kDa	0.366	15	15	0.342	14	14	0.322	14	14	0	0	0	0	0	0	0	0	0
238	RRBP1_HUMAN	Ribosome-binding protein 1 OS=Homo sapiens GN=RRBP1 PE=1 SV=4	152 kDa	0.101	10	10	0.0936	9	9	0.12	11	11	0.066	7	7	0.102	10	10	0.0702	6	6
239	RS15A_HUMAN	40S ribosomal protein S15a OS=Homo sapiens GN=RPS15A PE=1 SV=2	15 kDa	0.385	5	5	0.385	5	5	0.385	5	5	0.238	3	3	0.238	3	3	0.308	4	4
240	SPEB_HUMAN	Agmatinase, mitochondrial OS=Homo sapiens GN=AGMAT PE=1 SV=2	38 kDa	0.264	5	5	0.264	5	5	0.338	7	7	0.213	4	4	0.213	4	4	0.298	6	6
241	PA2G4_HUMAN	Proliferation-associated protein 2G4 OS=Homo sapiens GN=PA2G4 PE=1 SV=3	44 kDa	0.226	7	7	0.264	8	8	0.292	8	8	0.289	8	8	0.206	6	6	0.264	7	7
242	DLDH_HUMAN	Dihydrolipoyl dehydrogenase, mitochondrial OS=Homo sapiens GN=DLD PE=1 SV=2	54 kDa	0.167	6	6	0.112	4	4	0.175	6	6	0.191	7	7	0.191	7	7	0.191	7	7
243	IF6_HUMAN	Eukaryotic translation initiation factor 6 OS=Homo sapiens GN=EIF6 PE=1 SV=1	27 kDa	0.327	5	5	0.359	6	6	0.327	5	5	0.314	4	4	0.347	5	5	0.429	6	6
244	PRP8_HUMAN	Pre-mRNA-processing-splicing factor 8 OS=Homo sapiens GN=PRPF8 PE=1 SV=2	274 kDa	0.0762	11	11	0.0822	11	11	0.0732	11	11	0.0668	10	10	0.0608	8	8	0.0612	9	9
245	PUR6_HUMAN	Multifunctional protein ADE2 OS=Homo sapiens GN=PAICS PE=1 SV=3	47 kDa	0.259	9	9	0.259	8	8	0.231	8	8	0.139	4	4	0.146	4	4	0.238	7	7
246	SYWC_HUMAN	Tryptophan--tRNA ligase, cytoplasmic OS=Homo sapiens GN=WARS PE=1 SV=2	53 kDa	0.117	3	3	0.117	3	3	0.168	4	4	0.355	12	12	0.229	7	7	0.378	11	11
247	THIC_HUMAN	Acetyl-CoA acetyltransferase, cytosolic OS=Homo sapiens GN=ACAT2 PE=1 SV=2	41 kDa	0.32	6	6	0.34	7	7	0.408	8	8	0.388	7	7	0.327	6	6	0.388	7	7
248	TRAP1_HUMAN	Heat shock protein 75 kDa, mitochondrial OS=Homo sapiens GN=TRAP1 PE=1 SV=3	80 kDa	0.143	7	6	0.185	9	8	0.185	9	8	0.21	10	9	0.237	12	11	0.209	10	9
249	SURF4_HUMAN	Surfeit locus protein 4 OS=Homo sapiens GN=SURF4 PE=1 SV=3	30 kDa	0.182	4	4	0.145	3	3	0.182	4	4	0.145	3	3	0.145	3	3	0.178	4	4
250	CALU_HUMAN	Calumenin OS=Homo sapiens GN=CALU PE=1 SV=2	37 kDa	0.283	5	5	0.244	4	4	0.244	4	4	0.295	5	5	0.244	4	4	0.295	5	5
251	RS16_HUMAN	40S ribosomal protein S16 OS=Homo sapiens GN=RPS16 PE=1 SV=2	16 kDa	0.377	6	6	0.438	6	6	0.377	6	6	0.356	5	5	0.356	5	5	0.199	3	3
252	CKAP4_HUMAN	Cytoskeleton-associated protein 4 OS=Homo sapiens GN=CKAP4 PE=1 SV=2	66 kDa	0.279	12	12	0.209	10	10	0.209	10	10	0.238	11	11	0.238	11	11	0.274	12	12
253	PSA_HUMAN	Puromycin-sensitive aminopeptidase OS=Homo sapiens GN=NPEPPS PE=1 SV=2	103 kDa	0.143	9	9	0.139	9	9	0.153	10	10	0.125	8	8	0.0968	7	7	0.0892	5	5
254	SF3B1_HUMAN	Splicing factor 3B subunit 1 OS=Homo sapiens GN=SF3B1 PE=1 SV=3	146 kDa	0.15	11	11	0.105	8	8	0.141	10	10	0.118	10	10	0.0491	4	4	0.0836	7	7
255	NOP56_HUMAN	Nucleolar protein 56 OS=Homo sapiens GN=NOP56 PE=1 SV=4	66 kDa	0.114	5	5	0.103	4	4	0.0859	3	3	0.227	10	10	0.205	8	8	0.239	10	10
256	ST1A1_HUMAN	Sulfotransferase 1A1 OS=Homo sapiens GN=SULT1A1 PE=1 SV=3	34 kDa	0.454	8	5	0.515	9	6	0.478	9	4	0.42	9	4	0.4	7	4	0.41	9	3
257	NONO_HUMAN	Non-POU domain-containing octamer-binding protein OS=Homo sapiens GN=NONO PE=1 SV=4	54 kDa	0.214	7	6	0.214	7	6	0.214	7	6	0.268	10	9	0.212	8	7	0.28	9	8
258	HMGB2_HUMAN	High mobility group protein B2 OS=Homo sapiens GN=HMGB2 PE=1 SV=2	24 kDa	0.249	6	5	0.244	5	4	0.249	6	5	0.239	5	4	0.239	5	4	0.297	5	3
259	KAD4_HUMAN	Adenylate kinase isoenzyme 4, mitochondrial OS=Homo sapiens GN=AK4 PE=1 SV=1	25 kDa	0.422	6	6	0.386	5	5	0.426	7	7	0.39	6	6	0.386	5	5	0.426	6	6
260	NCPR_HUMAN	NADPH--cytochrome P450 reductase OS=Homo sapiens GN=POR PE=1 SV=2	77 kDa	0.202	10	10	0.198	11	11	0.205	11	11	0.192	9	9	0.0281	2	2	0.129	5	5
261	RANG_HUMAN	Ran-specific GTPase-activating protein OS=Homo sapiens GN=RANBP1 PE=1 SV=1	23 kDa	0.498	5	5	0.498	5	5	0.498	5	5	0.443	4	4	0.443	4	4	0.498	5	5
262	APEX1_HUMAN	DNA-(apurinic or apyrimidinic site) lyase OS=Homo sapiens GN=APEX1 PE=1 SV=2	36 kDa	0.302	6	6	0.346	6	6	0.412	7	7	0.396	6	6	0.5	8	8	0.412	7	7
263	HNRPR_HUMAN	Heterogeneous nuclear ribonucleoprotein R OS=Homo sapiens GN=HNRNPR PE=1 SV=1	71 kDa	0.207	11	7	0.227	12	8	0.207	11	8	0.186	10	6	0.186	10	6	0.197	10	7
264	PLIN3_HUMAN	Perilipin-3 OS=Homo sapiens GN=PLIN3 PE=1 SV=3	47 kDa	0.442	11	11	0.484	12	12	0.378	10	10	0.348	8	8	0.242	6	6	0.357	9	9
265.1	PSA7_HUMAN	Proteasome subunit alpha type-7 OS=Homo sapiens GN=PSMA7 PE=1 SV=1	28 kDa	0.399	7	3	0.306	5	1	0.306	6	1	0.375	8	3	0.335	6	2	0.339	7	2
265.2	PSA7L_HUMAN	Proteasome subunit alpha type-7-like OS=Homo sapiens GN=PSMA8 PE=1 SV=3	29 kDa	0.242	4	0	0.242	4	0	0.242	5	0	0.242	5	0	0.238	4	0	0.242	5	0
266	ACADV_HUMAN	Very long-chain specific acyl-CoA dehydrogenase, mitochondrial OS=Homo sapiens GN=ACADVL PE=1 SV=1	70 kDa	0.218	9	9	0.185	7	7	0.234	9	9	0.186	7	7	0.0931	4	4	0.127	4	4
267	CATA_HUMAN	Catalase OS=Homo sapiens GN=CAT PE=1 SV=3	60 kDa	0.195	8	8	0.235	9	9	0.161	5	5	0.184	8	8	0.205	7	7	0.224	8	8
268	ILF2_HUMAN	Interleukin enhancer-binding factor 2 OS=Homo sapiens GN=ILF2 PE=1 SV=2	43 kDa	0.185	5	5	0.185	6	6	0.185	6	6	0.185	6	6	0.185	6	6	0.185	6	6
269	MBB1A_HUMAN	Myb-binding protein 1A OS=Homo sapiens GN=MYBBP1A PE=1 SV=2	149 kDa	0.0858	9	9	0.0798	8	8	0.0708	8	8	0.0956	11	11	0.0489	6	6	0.108	12	12
270	PSMD2_HUMAN	26S proteasome non-ATPase regulatory subunit 2 OS=Homo sapiens GN=PSMD2 PE=1 SV=3	100 kDa	0.174	10	10	0.16	9	9	0.164	9	9	0.104	6	6	0.148	8	8	0.119	6	6
271	RL38_HUMAN	60S ribosomal protein L38 OS=Homo sapiens GN=RPL38 PE=1 SV=2	8 kDa	0.186	2	2	0.186	2	2	0.329	3	3	0.186	2	2	0.186	1	1	0.186	2	2
272	ATP5H_HUMAN	ATP synthase subunit d, mitochondrial OS=Homo sapiens GN=ATP5H PE=1 SV=3	18 kDa	0.435	5	5	0.503	6	6	0.441	6	6	0.441	5	5	0.441	6	6	0.596	7	7
273	RL36_HUMAN	60S ribosomal protein L36 OS=Homo sapiens GN=RPL36 PE=1 SV=3	12 kDa	0.305	4	4	0.305	4	4	0.219	3	3	0.219	3	3	0.124	2	2	0.219	3	3
274	COPB_HUMAN	Coatomer subunit beta OS=Homo sapiens GN=COPB1 PE=1 SV=3	107 kDa	0.086	5	5	0.12	7	7	0.161	9	9	0.136	8	8	0.141	9	9	0.139	8	8
275	CYTB_HUMAN	Cystatin-B OS=Homo sapiens GN=CSTB PE=1 SV=2	11 kDa	0.459	3	3	0.551	4	4	0.551	4	4	0.459	3	3	0.337	2	2	0.429	3	3
276	MTCH2_HUMAN	Mitochondrial carrier homolog 2 OS=Homo sapiens GN=MTCH2 PE=1 SV=1	33 kDa	0.271	5	5	0.271	5	5	0.271	5	5	0.271	5	5	0.271	5	5	0.271	5	5
277	THIL_HUMAN	Acetyl-CoA acetyltransferase, mitochondrial OS=Homo sapiens GN=ACAT1 PE=1 SV=1	45 kDa	0.15	4	4	0.187	5	5	0.178	5	5	0.232	7	7	0.183	6	6	0.15	4	4
278.1	PCKGM_HUMAN	Phosphoenolpyruvate carboxykinase [GTP], mitochondrial OS=Homo sapiens GN=PCK2 PE=1 SV=3	71 kDa	0.0672	3	3	0.0656	3	3	0.131	6	6	0.275	13	13	0.222	11	11	0.253	14	14
278.2	PCKGC_HUMAN	Phosphoenolpyruvate carboxykinase, cytosolic [GTP] OS=Homo sapiens GN=PCK1 PE=1 SV=3	69 kDa	0	0	0	0	0	0	0	0	0	0	0	0	0	0	0	0	0	0
279	PRDX4_HUMAN	Peroxiredoxin-4 OS=Homo sapiens GN=PRDX4 PE=1 SV=1	31 kDa	0.458	10	8	0.406	8	7	0.369	8	6	0.376	7	6	0.325	6	5	0.332	6	5
280	RLA1_HUMAN	60S acidic ribosomal protein P1 OS=Homo sapiens GN=RPLP1 PE=1 SV=1	12 kDa	0.518	2	2	0.518	2	2	0.518	2	2	0.518	2	2	0.518	2	2	0.518	2	2
281	COPG1_HUMAN	Coatomer subunit gamma-1 OS=Homo sapiens GN=COPG1 PE=1 SV=1	98 kDa	0.137	7	7	0.129	7	7	0.15	8	8	0.133	9	9	0.14	9	9	0.164	10	10
282	LMAN1_HUMAN	Protein ERGIC-53 OS=Homo sapiens GN=LMAN1 PE=1 SV=2	58 kDa	0.169	4	4	0.229	7	7	0.186	5	5	0.245	8	8	0.224	6	6	0.208	5	5
283	RL15_HUMAN	60S ribosomal protein L15 OS=Homo sapiens GN=RPL15 PE=1 SV=2	24 kDa	0.181	4	4	0.181	4	4	0.113	3	3	0.191	4	4	0.108	2	2	0.26	5	5
284	RL30_HUMAN	60S ribosomal protein L30 OS=Homo sapiens GN=RPL30 PE=1 SV=2	13 kDa	0.513	4	4	0.513	4	4	0.513	4	4	0.409	3	3	0.409	3	3	0.513	4	4
285	RS18_HUMAN	40S ribosomal protein S18 OS=Homo sapiens GN=RPS18 PE=1 SV=3	18 kDa	0.388	7	7	0.25	5	5	0.388	7	7	0.243	4	4	0.243	4	4	0.303	5	5
286	ACLY_HUMAN	ATP-citrate synthase OS=Homo sapiens GN=ACLY PE=1 SV=3	121 kDa	0.112	8	8	0.131	9	9	0.138	9	9	0.114	8	8	0.0554	4	4	0.0554	4	4
287	GCN1L_HUMAN	Translational activator GCN1 OS=Homo sapiens GN=GCN1L1 PE=1 SV=6	293 kDa	0.0779	13	13	0.0494	9	9	0.0696	13	13	0.0303	6	6	0.0285	5	5	0.0307	5	5
288	GSTO1_HUMAN	Glutathione S-transferase omega-1 OS=Homo sapiens GN=GSTO1 PE=1 SV=2	28 kDa	0.257	6	6	0.295	7	7	0.257	7	7	0.216	6	6	0.249	7	7	0.315	7	7
289	RL35_HUMAN	60S ribosomal protein L35 OS=Homo sapiens GN=RPL35 PE=1 SV=2	15 kDa	0.268	4	4	0.26	3	3	0.26	3	3	0.26	3	3	0.26	3	3	0.26	3	3
290	GSHR_HUMAN	Glutathione reductase, mitochondrial OS=Homo sapiens GN=GSR PE=1 SV=2	56 kDa	0.167	5	5	0.207	6	6	0.178	5	5	0.243	7	7	0.285	8	8	0.178	5	5
291	HINT1_HUMAN	Histidine triad nucleotide-binding protein 1 OS=Homo sapiens GN=HINT1 PE=1 SV=2	14 kDa	0.46	3	3	0.159	1	1	0.46	3	3	0.349	2	2	0.159	1	1	0.349	2	2
292	HNRPF_HUMAN	Heterogeneous nuclear ribonucleoprotein F OS=Homo sapiens GN=HNRNPF PE=1 SV=3	46 kDa	0.26	6	4	0.222	6	4	0.378	8	6	0.26	6	4	0.2	6	4	0.181	5	3
293	RL32_HUMAN	60S ribosomal protein L32 OS=Homo sapiens GN=RPL32 PE=1 SV=2	16 kDa	0.281	4	4	0.281	3	3	0.289	5	5	0.356	5	5	0.267	3	3	0.437	7	7
294.1	TRXR1_HUMAN	Thioredoxin reductase 1, cytoplasmic OS=Homo sapiens GN=TXNRD1 PE=1 SV=3	71 kDa	0.163	7	6	0.214	9	8	0.19	8	7	0.142	6	6	0.206	8	8	0.257	11	10
294.2	TRXR2_HUMAN	Thioredoxin reductase 2, mitochondrial OS=Homo sapiens GN=TXNRD2 PE=1 SV=3	57 kDa	0.0286	1	0	0	0	0	0	0	0	0	0	0	0	0	0	0	0	0
295	EIF3B_HUMAN	Eukaryotic translation initiation factor 3 subunit B OS=Homo sapiens GN=EIF3B PE=1 SV=3	92 kDa	0.124	6	6	0.0811	5	5	0.13	7	7	0.2	11	11	0.102	7	7	0.17	10	10
296	HNRPD_HUMAN	Heterogeneous nuclear ribonucleoprotein D0 OS=Homo sapiens GN=HNRNPD PE=1 SV=1	38 kDa	0.223	6	5	0.203	6	5	0.239	7	6	0.169	5	3	0.169	5	3	0.22	6	4
297	RS14_HUMAN	40S ribosomal protein S14 OS=Homo sapiens GN=RPS14 PE=1 SV=3	16 kDa	0.391	6	6	0.397	7	7	0.325	6	6	0.391	5	5	0.391	6	6	0.391	6	6
298	G6PD_HUMAN	Glucose-6-phosphate 1-dehydrogenase OS=Homo sapiens GN=G6PD PE=1 SV=4	59 kDa	0.233	9	9	0.194	8	8	0.235	8	8	0.144	6	6	0.134	5	5	0.157	6	6
299	FBX2_HUMAN	F-box only protein 2 OS=Homo sapiens GN=FBXO2 PE=1 SV=2	33 kDa	0.23	5	5	0.23	5	5	0.297	6	6	0.372	7	7	0.372	6	6	0.372	7	7
300	MYH10_HUMAN	Myosin-10 OS=Homo sapiens GN=MYH10 PE=1 SV=3	229 kDa	0.0734	10	4	0.0541	8	3	0.0531	7	3	0.0855	10	8	0.0845	10	8	0.0972	12	11
301	SND1_HUMAN	Staphylococcal nuclease domain-containing protein 1 OS=Homo sapiens GN=SND1 PE=1 SV=1	102 kDa	0.138	7	7	0.13	7	7	0.163	9	9	0.154	9	9	0.105	6	6	0.105	6	6
302	VDAC2_HUMAN	Voltage-dependent anion-selective channel protein 2 OS=Homo sapiens GN=VDAC2 PE=1 SV=2	32 kDa	0.218	6	6	0.19	4	4	0.218	5	5	0.255	7	7	0.282	8	8	0.255	6	6
303	DDX1_HUMAN	ATP-dependent RNA helicase DDX1 OS=Homo sapiens GN=DDX1 PE=1 SV=2	82 kDa	0.145	8	8	0.108	6	6	0.132	8	8	0.176	8	8	0.138	6	6	0.123	5	5
304	LONM_HUMAN	Lon protease homolog, mitochondrial OS=Homo sapiens GN=LONP1 PE=1 SV=2	106 kDa	0.074	5	5	0.0448	4	4	0.0772	4	4	0.181	10	10	0.171	10	10	0.181	10	10
305	PRP19_HUMAN	Pre-mRNA-processing factor 19 OS=Homo sapiens GN=PRPF19 PE=1 SV=1	55 kDa	0.173	4	4	0.173	4	4	0.173	4	4	0.113	3	3	0.206	4	4	0.113	3	3
306	RS17L_HUMAN (+1)	40S ribosomal protein S17-like OS=Homo sapiens GN=RPS17L PE=3 SV=1	16 kDa	0.326	3	3	0.326	3	3	0.326	4	4	0.326	3	3	0.252	2	2	0.326	3	3
307	AHNK_HUMAN	Neuroblast differentiation-associated protein AHNAK OS=Homo sapiens GN=AHNAK PE=1 SV=2	629 kDa	0.0222	9	9	0.0299	13	13	0.0238	10	10	0.00951	4	4	0.00492	2	2	0.00492	2	2
308	CYC_HUMAN	Cytochrome c OS=Homo sapiens GN=CYCS PE=1 SV=2	12 kDa	0.486	4	4	0.486	4	4	0.486	4	4	0.486	4	4	0.486	5	5	0.495	4	4
309	ATPO_HUMAN	ATP synthase subunit O, mitochondrial OS=Homo sapiens GN=ATP5O PE=1 SV=1	23 kDa	0.545	8	8	0.545	8	8	0.437	6	6	0.455	7	7	0.418	7	7	0.498	8	8
310	DDX5_HUMAN	Probable ATP-dependent RNA helicase DDX5 OS=Homo sapiens GN=DDX5 PE=1 SV=1	69 kDa	0.27	12	8	0.243	11	8	0.246	11	8	0.186	10	5	0.135	8	4	0.186	10	5
311	PUR2_HUMAN	Trifunctional purine biosynthetic protein adenosine-3 OS=Homo sapiens GN=GART PE=1 SV=1	108 kDa	0.123	8	8	0.103	7	7	0.0713	5	5	0.12	9	9	0.14	9	9	0.113	8	8
312	QCR2_HUMAN	Cytochrome b-c1 complex subunit 2, mitochondrial OS=Homo sapiens GN=UQCRC2 PE=1 SV=3	48 kDa	0.212	6	6	0.199	6	6	0.234	7	7	0.247	7	7	0.208	6	6	0.234	7	7
313	RL1D1_HUMAN	Ribosomal L1 domain-containing protein 1 OS=Homo sapiens GN=RSL1D1 PE=1 SV=3	55 kDa	0.216	7	7	0.212	8	8	0.194	7	7	0.184	7	7	0.139	5	5	0.229	8	8
314	SYVC_HUMAN	Valine--tRNA ligase OS=Homo sapiens GN=VARS PE=1 SV=4	140 kDa	0.0593	6	6	0.072	6	6	0.0443	4	4	0.0878	7	7	0.0997	9	9	0.0926	8	8
315	XPO2_HUMAN	Exportin-2 OS=Homo sapiens GN=CSE1L PE=1 SV=3	110 kDa	0.139	10	10	0.129	9	9	0.131	9	9	0.109	7	7	0.109	7	7	0.0844	5	5
316.1	H2AY_HUMAN	Core histone macro-H2A.1 OS=Homo sapiens GN=H2AFY PE=1 SV=4	40 kDa	0.156	3	2	0.156	3	2	0.185	4	3	0.188	4	4	0.18	4	3	0.156	3	2
316.2	H2AW_HUMAN	Core histone macro-H2A.2 OS=Homo sapiens GN=H2AFY2 PE=1 SV=3	40 kDa	0.086	2	1	0.086	2	1	0.086	2	1	0	0	0	0.086	2	1	0	0	0
317	QCR1_HUMAN	Cytochrome b-c1 complex subunit 1, mitochondrial OS=Homo sapiens GN=UQCRC1 PE=1 SV=3	53 kDa	0.15	5	5	0.192	6	6	0.192	6	6	0.233	7	7	0.267	8	8	0.235	7	7
318	RL23A_HUMAN	60S ribosomal protein L23a OS=Homo sapiens GN=RPL23A PE=1 SV=1	18 kDa	0.192	4	4	0.256	5	5	0.34	6	6	0.282	6	6	0.282	6	6	0.282	6	6
319	OST48_HUMAN	Dolichyl-diphosphooligosaccharide--protein glycosyltransferase 48 kDa subunit OS=Homo sapiens GN=DDOST PE=1 SV=4	51 kDa	0.263	7	7	0.239	6	6	0.261	7	7	0.241	6	6	0.0658	3	3	0.149	5	5
320	PSD11_HUMAN	26S proteasome non-ATPase regulatory subunit 11 OS=Homo sapiens GN=PSMD11 PE=1 SV=3	47 kDa	0.299	9	9	0.268	8	8	0.268	8	8	0.211	7	7	0.218	7	7	0.218	7	7
321	RTCB_HUMAN	tRNA-splicing ligase RtcB homolog OS=Homo sapiens GN=C22orf28 PE=1 SV=1	55 kDa	0.299	9	9	0.253	7	7	0.232	6	6	0.139	4	4	0.23	6	6	0.188	5	5
322	HMGA2_HUMAN	High mobility group protein HMGI-C OS=Homo sapiens GN=HMGA2 PE=1 SV=1	12 kDa	0.211	2	2	0.211	2	2	0.211	2	2	0.294	3	3	0.284	2	2	0.294	3	3
323.1	F10A1_HUMAN	Hsc70-interacting protein OS=Homo sapiens GN=ST13 PE=1 SV=2	41 kDa	0.179	5	1	0.179	5	1	0.146	4	0	0.179	5	1	0.179	5	1	0.13	4	1
323.2	ST134_HUMAN	Putative protein FAM10A4 OS=Homo sapiens GN=ST13P4 PE=5 SV=1	27 kDa	0.225	4	0	0.225	4	0	0.225	4	0	0.225	4	0	0.225	4	0	0.15	3	0
324	UGPA_HUMAN	UTP--glucose-1-phosphate uridylyltransferase OS=Homo sapiens GN=UGP2 PE=1 SV=5	57 kDa	0.175	8	8	0.215	8	8	0.175	7	7	0.169	5	5	0.114	4	4	0.0591	2	2
325	APMAP_HUMAN	Adipocyte plasma membrane-associated protein OS=Homo sapiens GN=APMAP PE=1 SV=2	46 kDa	0.209	5	5	0.209	5	5	0.233	6	6	0.195	5	5	0.173	4	4	0.209	5	5
326	LGUL_HUMAN	Lactoylglutathione lyase OS=Homo sapiens GN=GLO1 PE=1 SV=4	21 kDa	0.293	5	5	0.293	4	4	0.348	6	6	0.348	5	5	0.348	5	5	0.348	5	5
327	PCNA_HUMAN	Proliferating cell nuclear antigen OS=Homo sapiens GN=PCNA PE=1 SV=1	29 kDa	0.364	6	6	0.471	8	8	0.471	8	8	0.303	5	5	0.253	4	4	0.23	4	4
328	PHS_HUMAN	Pterin-4-alpha-carbinolamine dehydratase OS=Homo sapiens GN=PCBD1 PE=1 SV=2	12 kDa	0.413	3	3	0.413	3	3	0.413	3	3	0.413	4	4	0.413	4	4	0.413	3	3
329	FUS_HUMAN	RNA-binding protein FUS OS=Homo sapiens GN=FUS PE=1 SV=1	53 kDa	0.0779	2	2	0.0779	2	2	0.0779	2	2	0.0722	2	1	0.0722	2	1	0.105	3	2
330	AT5F1_HUMAN	ATP synthase subunit b, mitochondrial OS=Homo sapiens GN=ATP5F1 PE=1 SV=2	29 kDa	0.184	3	3	0.184	3	3	0.266	5	5	0.289	6	6	0.258	5	5	0.289	6	6
331	COX2_HUMAN	Cytochrome c oxidase subunit 2 OS=Homo sapiens GN=MT-CO2 PE=1 SV=1	26 kDa	0.247	4	4	0.176	3	3	0.247	4	4	0.247	4	4	0.247	4	4	0.247	4	4
332	PYC_HUMAN	Pyruvate carboxylase, mitochondrial OS=Homo sapiens GN=PC PE=1 SV=2	130 kDa	0.111	7	7	0.0968	6	6	0.132	8	8	0.104	7	7	0.101	7	7	0.0849	6	6
333	ST2A1_HUMAN	Bile salt sulfotransferase OS=Homo sapiens GN=SULT2A1 PE=1 SV=3	34 kDa	0.151	3	3	0.186	4	4	0.186	4	4	0.186	4	4	0.225	5	5	0.225	5	5
334	1433T_HUMAN	14-3-3 protein theta OS=Homo sapiens GN=YWHAQ PE=1 SV=1	28 kDa	0.384	7	5	0.384	8	6	0.306	6	4	0.384	8	6	0.42	9	7	0.384	7	5
335	ACON_HUMAN	Aconitate hydratase, mitochondrial OS=Homo sapiens GN=ACO2 PE=1 SV=2	85 kDa	0.104	6	6	0.0808	4	4	0.101	4	4	0.177	8	8	0.141	6	6	0.186	9	9
336	C1TC_HUMAN	C-1-tetrahydrofolate synthase, cytoplasmic OS=Homo sapiens GN=MTHFD1 PE=1 SV=3	102 kDa	0.125	7	7	0.15	9	9	0.142	9	9	0.0963	5	5	0.0567	2	2	0.11	6	6
337	GDIR1_HUMAN	Rho GDP-dissociation inhibitor 1 OS=Homo sapiens GN=ARHGDIA PE=1 SV=3	23 kDa	0.225	4	4	0.225	4	4	0.225	4	4	0.225	4	4	0.225	4	4	0.225	4	4
338	GLU2B_HUMAN	Glucosidase 2 subunit beta OS=Homo sapiens GN=PRKCSH PE=1 SV=2	59 kDa	0.15	6	6	0.15	6	6	0.15	6	6	0.199	8	8	0.153	6	6	0.174	7	7
339	MYL6_HUMAN	Myosin light polypeptide 6 OS=Homo sapiens GN=MYL6 PE=1 SV=2	17 kDa	0.424	5	5	0.424	5	5	0.351	4	4	0.351	4	4	0.351	4	4	0.351	4	4
340	SET_HUMAN	Protein SET OS=Homo sapiens GN=SET PE=1 SV=3	33 kDa	0.155	3	3	0.0793	2	2	0.0793	2	2	0.3	6	6	0.252	6	6	0.179	4	4
341	AMPN_HUMAN	Aminopeptidase N OS=Homo sapiens GN=ANPEP PE=1 SV=4	110 kDa	0.0693	4	4	0.0279	2	2	0.0848	5	5	0.147	8	8	0.164	10	10	0.181	11	11
342	PYR1_HUMAN	CAD protein OS=Homo sapiens GN=CAD PE=1 SV=3	243 kDa	0.0521	7	7	0.0373	6	6	0.0544	8	8	0.0548	8	8	0.0301	5	5	0.018	3	3
343	RL19_HUMAN	60S ribosomal protein L19 OS=Homo sapiens GN=RPL19 PE=1 SV=1	23 kDa	0.133	2	2	0.133	2	2	0.133	2	2	0.179	3	3	0.219	4	4	0.219	4	4
344	RL27A_HUMAN	60S ribosomal protein L27a OS=Homo sapiens GN=RPL27A PE=1 SV=2	17 kDa	0.311	5	5	0.311	5	5	0.311	5	5	0.277	5	5	0.277	4	4	0.277	5	5
345	BASI_HUMAN	Basigin OS=Homo sapiens GN=BSG PE=1 SV=2	42 kDa	0.275	6	6	0.171	4	4	0.195	5	5	0.262	5	5	0.255	6	6	0.242	6	6
346.1	DDX21_HUMAN	Nucleolar RNA helicase 2 OS=Homo sapiens GN=DDX21 PE=1 SV=5	87 kDa	0.128	7	6	0.109	6	5	0.211	11	9	0.12	7	6	0.0587	3	3	0.128	7	7
346.2	DDX50_HUMAN	ATP-dependent RNA helicase DDX50 OS=Homo sapiens GN=DDX50 PE=1 SV=1	83 kDa	0.0543	2	1	0	0	0	0.0366	2	0	0.0204	1	0	0	0	0	0	0	0
347	IF2G_HUMAN	Eukaryotic translation initiation factor 2 subunit 3 OS=Homo sapiens GN=EIF2S3 PE=1 SV=3	51 kDa	0.222	6	6	0.199	5	5	0.222	6	6	0.263	8	8	0.206	6	6	0.261	8	8
348	MPCP_HUMAN	Phosphate carrier protein, mitochondrial OS=Homo sapiens GN=SLC25A3 PE=1 SV=2	40 kDa	0.0746	3	3	0.0746	2	2	0.0718	2	2	0.204	6	6	0.204	6	6	0.16	5	5
349	RS29_HUMAN	40S ribosomal protein S29 OS=Homo sapiens GN=RPS29 PE=1 SV=2	7 kDa	0.339	2	2	0.196	1	1	0.339	2	2	0.196	1	1	0.196	1	1	0.339	2	2
350	AMPL_HUMAN	Cytosol aminopeptidase OS=Homo sapiens GN=LAP3 PE=1 SV=3	56 kDa	0.212	7	7	0.202	7	7	0.212	7	7	0.187	6	6	0.146	5	5	0.198	7	7
351	COMT_HUMAN	Catechol O-methyltransferase OS=Homo sapiens GN=COMT PE=1 SV=2	30 kDa	0.244	4	4	0.244	4	4	0.244	4	4	0.251	4	4	0.188	3	3	0.14	3	3
352.1	KHDR1_HUMAN	KH domain-containing, RNA-binding, signal transduction-associated protein 1 OS=Homo sapiens GN=KHDRBS1 PE=1 SV=1	48 kDa	0.16	6	6	0.129	5	5	0.138	5	5	0.129	4	4	0.108	3	3	0.108	3	3
352.2	KHDR3_HUMAN	KH domain-containing, RNA-binding, signal transduction-associated protein 3 OS=Homo sapiens GN=KHDRBS3 PE=1 SV=1	39 kDa	0.0607	1	1	0	0	0	0	0	0	0	0	0	0	0	0	0	0	0
352.3	KHDR2_HUMAN	KH domain-containing, RNA-binding, signal transduction-associated protein 2 OS=Homo sapiens GN=KHDRBS2 PE=1 SV=1	39 kDa	0	0	0	0	0	0	0	0	0	0	0	0	0	0	0	0	0	0
353	ML12A_HUMAN (+1)	Myosin regulatory light chain 12A OS=Homo sapiens GN=MYL12A PE=1 SV=2	20 kDa	0.164	2	2	0.269	3	3	0.105	1	1	0.158	2	2	0.158	2	2	0.105	1	1
354	SAP_HUMAN	Proactivator polypeptide OS=Homo sapiens GN=PSAP PE=1 SV=2	58 kDa	0.0859	4	4	0.101	5	5	0.116	6	6	0.116	6	6	0.132	6	6	0.156	7	7
355	SYIC_HUMAN	Isoleucine--tRNA ligase, cytoplasmic OS=Homo sapiens GN=IARS PE=1 SV=2	145 kDa	0.0293	3	3	0.0214	2	2	0.0848	7	7	0.114	10	10	0.105	9	9	0.112	10	10
356	SYRC_HUMAN	Arginine--tRNA ligase, cytoplasmic OS=Homo sapiens GN=RARS PE=1 SV=2	75 kDa	0.133	7	7	0.133	7	7	0.133	7	7	0.179	9	9	0.133	7	7	0.132	7	7
357	COX5A_HUMAN	Cytochrome c oxidase subunit 5A, mitochondrial OS=Homo sapiens GN=COX5A PE=1 SV=2	17 kDa	0.413	4	4	0.213	2	2	0.413	4	4	0.467	5	5	0.533	6	6	0.533	6	6
358	OLA1_HUMAN	Obg-like ATPase 1 OS=Homo sapiens GN=OLA1 PE=1 SV=2	45 kDa	0.29	8	8	0.197	6	6	0.197	6	6	0.159	5	5	0.157	5	5	0.182	6	6
359	RL9_HUMAN	60S ribosomal protein L9 OS=Homo sapiens GN=RPL9 PE=1 SV=1	22 kDa	0.286	5	5	0.286	5	5	0.286	5	5	0.255	5	5	0.286	5	5	0.286	5	5
360	TCP4_HUMAN	Activated RNA polymerase II transcriptional coactivator p15 OS=Homo sapiens GN=SUB1 PE=1 SV=3	14 kDa	0.378	7	7	0.378	8	8	0.378	6	6	0.37	5	5	0.378	6	6	0.299	4	4
361	FBRL_HUMAN	rRNA 2'-O-methyltransferase fibrillarin OS=Homo sapiens GN=FBL PE=1 SV=2	34 kDa	0.259	6	4	0.221	5	3	0.262	6	4	0.227	6	5	0.202	5	4	0.227	6	5
362	HNRPQ_HUMAN	Heterogeneous nuclear ribonucleoprotein Q OS=Homo sapiens GN=SYNCRIP PE=1 SV=2	70 kDa	0.201	10	6	0.175	9	5	0.169	9	6	0.149	8	4	0.132	7	3	0.136	7	4
363	SYQ_HUMAN	Glutamine--tRNA ligase OS=Homo sapiens GN=QARS PE=1 SV=1	88 kDa	0.089	6	6	0.117	8	8	0.161	10	10	0.107	6	6	0.049	3	3	0.0658	4	4
364	RS15_HUMAN	40S ribosomal protein S15 OS=Homo sapiens GN=RPS15 PE=1 SV=2	17 kDa	0.372	4	4	0.372	4	4	0.372	4	4	0.372	4	4	0.372	4	4	0.372	4	4
365	UB2L3_HUMAN	Ubiquitin-conjugating enzyme E2 L3 OS=Homo sapiens GN=UBE2L3 PE=1 SV=1	18 kDa	0.416	4	4	0.357	3	3	0.357	3	3	0.357	3	3	0.357	3	3	0.357	3	3
366	CDC37_HUMAN	Hsp90 co-chaperone Cdc37 OS=Homo sapiens GN=CDC37 PE=1 SV=1	44 kDa	0.185	5	5	0.209	6	6	0.257	7	7	0.177	4	4	0.175	4	4	0.19	4	4
367	CNPY2_HUMAN	Protein canopy homolog 2 OS=Homo sapiens GN=CNPY2 PE=1 SV=1	21 kDa	0.159	2	2	0.302	4	4	0.302	4	4	0.478	6	6	0.39	5	5	0.478	6	6
368	RL13A_HUMAN	60S ribosomal protein L13a OS=Homo sapiens GN=RPL13A PE=1 SV=2	24 kDa	0.212	4	4	0.202	4	4	0.153	3	3	0.212	4	4	0.192	4	4	0.133	3	3
369	RL23_HUMAN	60S ribosomal protein L23 OS=Homo sapiens GN=RPL23 PE=1 SV=1	15 kDa	0.271	3	3	0.271	3	3	0.271	3	3	0.25	2	2	0.271	3	3	0.307	3	3
370	QCR6_HUMAN	Cytochrome b-c1 complex subunit 6, mitochondrial OS=Homo sapiens GN=UQCRH PE=1 SV=2	11 kDa	0.198	1	1	0.198	1	1	0.198	1	1	0.198	1	1	0.297	2	2	0.297	2	2
371	DDX17_HUMAN	Probable ATP-dependent RNA helicase DDX17 OS=Homo sapiens GN=DDX17 PE=1 SV=2	80 kDa	0.174	10	6	0.174	10	7	0.174	10	7	0.218	13	8	0.141	9	5	0.147	9	4
372	KAD2_HUMAN	Adenylate kinase 2, mitochondrial OS=Homo sapiens GN=AK2 PE=1 SV=2	26 kDa	0.293	4	4	0.293	4	4	0.385	6	6	0.285	4	4	0.372	6	6	0.385	6	6
373	H2AV_HUMAN (+1)	Histone H2A.V OS=Homo sapiens GN=H2AFV PE=1 SV=3	14 kDa	0.484	4	3	0.484	4	3	0.484	4	3	0.484	4	3	0.484	4	3	0.18	2	1
374	RS25_HUMAN	40S ribosomal protein S25 OS=Homo sapiens GN=RPS25 PE=1 SV=1	14 kDa	0.24	4	4	0.24	4	4	0.24	4	4	0.24	4	4	0.24	4	4	0.24	4	4
375	IF4A3_HUMAN	Eukaryotic initiation factor 4A-III OS=Homo sapiens GN=EIF4A3 PE=1 SV=4	47 kDa	0.229	8	5	0.275	9	7	0.246	7	5	0.275	9	6	0.246	7	5	0.273	8	6
376	LMNB1_HUMAN	Lamin-B1 OS=Homo sapiens GN=LMNB1 PE=1 SV=2	66 kDa	0.16	8	7	0.142	6	5	0.108	5	4	0.101	5	5	0.104	5	5	0.123	6	5
377	NUDC_HUMAN	Nuclear migration protein nudC OS=Homo sapiens GN=NUDC PE=1 SV=1	38 kDa	0.115	3	3	0.16	4	4	0.16	4	4	0.13	4	4	0.211	6	6	0.175	5	5
378	PSME1_HUMAN	Proteasome activator complex subunit 1 OS=Homo sapiens GN=PSME1 PE=1 SV=1	29 kDa	0.185	3	3	0.229	5	5	0.185	3	3	0.141	3	3	0.197	4	4	0.197	4	4
379	SRSF1_HUMAN	Serine/arginine-rich splicing factor 1 OS=Homo sapiens GN=SRSF1 PE=1 SV=2	28 kDa	0.347	7	7	0.347	7	7	0.351	8	8	0.286	6	6	0.194	4	4	0.367	7	7
380	CDC42_HUMAN	Cell division control protein 42 homolog OS=Homo sapiens GN=CDC42 PE=1 SV=2	21 kDa	0.257	4	3	0.257	4	3	0.199	3	3	0.199	3	2	0.257	4	3	0.089	1	1
381	PSA6_HUMAN	Proteasome subunit alpha type-6 OS=Homo sapiens GN=PSMA6 PE=1 SV=1	27 kDa	0.211	4	4	0.252	5	5	0.114	2	2	0.215	4	4	0.215	4	4	0.264	5	5
382	SERPH_HUMAN	Serpin H1 OS=Homo sapiens GN=SERPINH1 PE=1 SV=2	46 kDa	0.165	4	4	0.194	5	5	0.194	4	4	0.184	5	5	0.184	4	4	0.211	5	5
383.1	VAPA_HUMAN	Vesicle-associated membrane protein-associated protein A OS=Homo sapiens GN=VAPA PE=1 SV=3	28 kDa	0.189	4	3	0.189	3	3	0.189	3	3	0.197	3	3	0.201	4	4	0.197	3	3
383.2	VAPB_HUMAN	Vesicle-associated membrane protein-associated protein B/C OS=Homo sapiens GN=VAPB PE=1 SV=3	27 kDa	0.128	2	1	0.0782	1	1	0.0782	1	1	0	0	0	0	0	0	0	0	0
384	ACPM_HUMAN	Acyl carrier protein, mitochondrial OS=Homo sapiens GN=NDUFAB1 PE=1 SV=3	17 kDa	0.179	3	3	0.237	3	3	0.237	3	3	0.212	3	3	0.154	2	2	0.154	2	2
385	ASGR1_HUMAN	Asialoglycoprotein receptor 1 OS=Homo sapiens GN=ASGR1 PE=1 SV=2	33 kDa	0.227	5	5	0.199	4	4	0.357	7	7	0.079	2	2	0.0412	1	1	0.0412	1	1
386.1	AT2A2_HUMAN	Sarcoplasmic/endoplasmic reticulum calcium ATPase 2 OS=Homo sapiens GN=ATP2A2 PE=1 SV=1	115 kDa	0.0585	4	1	0.0662	4	1	0.116	8	5	0.0912	6	3	0.107	7	4	0.117	9	5
386.2	AT2A1_HUMAN	Sarcoplasmic/endoplasmic reticulum calcium ATPase 1 OS=Homo sapiens GN=ATP2A1 PE=1 SV=1	110 kDa	0	0	0	0	0	0	0	0	0	0.033	2	0	0	0	0	0	0	0
386.3	AT2A3_HUMAN	Sarcoplasmic/endoplasmic reticulum calcium ATPase 3 OS=Homo sapiens GN=ATP2A3 PE=1 SV=2	114 kDa	0	0	0	0	0	0	0	0	0	0	0	0	0	0	0	0	0	0
387	RTN4_HUMAN	Reticulon-4 OS=Homo sapiens GN=RTN4 PE=1 SV=2	130 kDa	0.0344	3	3	0.0629	4	4	0.0629	4	4	0.0235	2	2	0.0235	2	2	0.0235	2	2
388	1433B_HUMAN	14-3-3 protein beta/alpha OS=Homo sapiens GN=YWHAB PE=1 SV=3	28 kDa	0.394	7	4	0.236	5	2	0.313	6	3	0.419	8	5	0.337	7	4	0.337	7	4
389	ARP3_HUMAN	Actin-related protein 3 OS=Homo sapiens GN=ACTR3 PE=1 SV=3	47 kDa	0.16	4	4	0.258	6	6	0.285	6	6	0.285	6	6	0.203	4	4	0.285	6	6
390.1	CAP1_HUMAN	Adenylyl cyclase-associated protein 1 OS=Homo sapiens GN=CAP1 PE=1 SV=5	52 kDa	0.194	6	6	0.194	6	6	0.171	5	5	0.288	9	8	0.0926	4	3	0.141	5	4
390.2	CAP2_HUMAN	Adenylyl cyclase-associated protein 2 OS=Homo sapiens GN=CAP2 PE=1 SV=1	53 kDa	0	0	0	0	0	0	0	0	0	0	0	0	0	0	0	0.0398	2	1
391	NP1L1_HUMAN	Nucleosome assembly protein 1-like 1 OS=Homo sapiens GN=NAP1L1 PE=1 SV=1	45 kDa	0.197	6	5	0.197	7	5	0.307	8	7	0.0895	2	2	0.115	3	2	0.148	4	3
392	ASNS_HUMAN	Asparagine synthetase [glutamine-hydrolyzing] OS=Homo sapiens GN=ASNS PE=1 SV=4	64 kDa	0	0	0	0	0	0	0.025	1	1	0.203	7	7	0.152	7	7	0.18	7	7
393	EF1B_HUMAN	Elongation factor 1-beta OS=Homo sapiens GN=EEF1B2 PE=1 SV=3	25 kDa	0.271	4	4	0.271	5	5	0.271	5	5	0.187	3	3	0.347	4	4	0.244	4	4
394	LMNB2_HUMAN	Lamin-B2 OS=Homo sapiens GN=LMNB2 PE=1 SV=3	68 kDa	0.127	7	6	0.158	9	8	0.182	10	9	0.095	4	4	0.095	4	4	0.188	9	8
395	RL13_HUMAN	60S ribosomal protein L13 OS=Homo sapiens GN=RPL13 PE=1 SV=4	24 kDa	0.242	5	5	0.242	5	5	0.294	6	6	0.251	5	5	0.161	3	3	0.199	4	4
396	RL21_HUMAN	60S ribosomal protein L21 OS=Homo sapiens GN=RPL21 PE=1 SV=2	19 kDa	0.219	4	4	0.213	3	3	0.213	3	3	0.213	3	3	0.213	3	3	0.325	6	6
397	U2AF2_HUMAN	Splicing factor U2AF 65 kDa subunit OS=Homo sapiens GN=U2AF2 PE=1 SV=4	54 kDa	0.128	3	3	0.168	4	4	0.128	3	3	0.168	4	4	0.107	2	2	0.141	3	3
398	OTUB1_HUMAN	Ubiquitin thioesterase OTUB1 OS=Homo sapiens GN=OTUB1 PE=1 SV=2	31 kDa	0.162	3	3	0.107	3	3	0.107	3	3	0.107	3	3	0.229	5	5	0.107	3	3
399	MARCS_HUMAN	Myristoylated alanine-rich C-kinase substrate OS=Homo sapiens GN=MARCKS PE=1 SV=4	32 kDa	0.0693	2	2	0.0693	2	2	0.0693	2	2	0.169	4	4	0.102	2	2	0.114	3	3
400	NHRF1_HUMAN	Na(+)/H(+) exchange regulatory cofactor NHE-RF1 OS=Homo sapiens GN=SLC9A3R1 PE=1 SV=4	39 kDa	0.26	6	6	0.182	4	4	0.221	5	5	0.142	3	3	0.0475	1	1	0.0866	2	2
401	SMD3_HUMAN	Small nuclear ribonucleoprotein Sm D3 OS=Homo sapiens GN=SNRPD3 PE=1 SV=1	14 kDa	0.317	3	3	0.317	3	3	0.317	3	3	0.317	3	3	0.238	2	2	0.317	3	3
402	SYMC_HUMAN	Methionine--tRNA ligase, cytoplasmic OS=Homo sapiens GN=MARS PE=1 SV=2	101 kDa	0.134	7	7	0.104	5	5	0.121	6	6	0.147	9	9	0.117	7	7	0.1	6	6
403	IPYR_HUMAN	Inorganic pyrophosphatase OS=Homo sapiens GN=PPA1 PE=1 SV=2	33 kDa	0.152	3	3	0.322	6	6	0.336	6	6	0.332	5	5	0.246	3	3	0.353	5	5
404	KAD3_HUMAN	GTP:AMP phosphotransferase, mitochondrial OS=Homo sapiens GN=AK3 PE=1 SV=4	26 kDa	0.154	3	3	0.106	2	2	0.22	3	3	0.374	7	7	0.396	8	8	0.326	6	6
405.1	AP1B1_HUMAN	AP-1 complex subunit beta-1 OS=Homo sapiens GN=AP1B1 PE=1 SV=2	105 kDa	0.0706	4	1	0.0811	5	1	0.0558	3	1	0.0885	4	3	0.0611	3	2	0.039	2	1
405.2	AP2B1_HUMAN	AP-2 complex subunit beta OS=Homo sapiens GN=AP2B1 PE=1 SV=1	105 kDa	0.0715	4	1	0.0544	4	0	0.0566	3	1	0.0363	2	1	0.0672	3	2	0.107	4	3
406	CYB5_HUMAN	Cytochrome b5 OS=Homo sapiens GN=CYB5A PE=1 SV=2	15 kDa	0.358	3	3	0.358	3	3	0.425	4	4	0.358	3	3	0.358	3	3	0.425	4	4
407	EIF3M_HUMAN	Eukaryotic translation initiation factor 3 subunit M OS=Homo sapiens GN=EIF3M PE=1 SV=1	43 kDa	0.147	3	3	0.147	3	3	0.147	3	3	0.131	3	3	0.0936	3	3	0.0936	2	2
408	FRIL_HUMAN	Ferritin light chain OS=Homo sapiens GN=FTL PE=1 SV=2	20 kDa	0.371	5	5	0.371	5	5	0.371	5	5	0.194	2	2	0.109	1	1	0.194	2	2
409	PSMD1_HUMAN	26S proteasome non-ATPase regulatory subunit 1 OS=Homo sapiens GN=PSMD1 PE=1 SV=2	106 kDa	0.107	6	6	0.0955	5	5	0.0881	5	5	0.0913	5	5	0.0913	5	5	0.141	8	8
410	RINI_HUMAN	Ribonuclease inhibitor OS=Homo sapiens GN=RNH1 PE=1 SV=2	50 kDa	0.239	6	6	0.217	6	6	0.226	6	6	0.187	5	5	0.0889	2	2	0.187	5	5
411	SC23A_HUMAN	Protein transport protein Sec23A OS=Homo sapiens GN=SEC23A PE=1 SV=2	86 kDa	0.108	6	4	0.108	6	4	0.0915	5	3	0.101	6	5	0.122	7	6	0.0562	3	1
412	U5S1_HUMAN	116 kDa U5 small nuclear ribonucleoprotein component OS=Homo sapiens GN=EFTUD2 PE=1 SV=1	109 kDa	0.115	8	7	0.115	8	7	0.0988	8	7	0.0782	6	5	0.0463	3	3	0.0648	5	4
413	UGGG1_HUMAN	UDP-glucose:glycoprotein glucosyltransferase 1 OS=Homo sapiens GN=UGGT1 PE=1 SV=3	177 kDa	0.083	6	6	0.072	6	6	0.0778	6	6	0.0727	6	6	0.0855	6	6	0.0559	4	4
414	XPO1_HUMAN	Exportin-1 OS=Homo sapiens GN=XPO1 PE=1 SV=1	123 kDa	0.0616	4	4	0.0635	4	4	0.0532	3	3	0.0644	4	4	0.0523	4	4	0.0644	4	4
415	1433S_HUMAN	14-3-3 protein sigma OS=Homo sapiens GN=SFN PE=1 SV=1	28 kDa	0.302	6	4	0.351	7	5	0.302	6	4	0.403	8	6	0.395	7	5	0.206	4	2
416	IDE_HUMAN	Insulin-degrading enzyme OS=Homo sapiens GN=IDE PE=1 SV=4	118 kDa	0.0599	4	4	0.0324	2	2	0.0294	2	2	0.0167	1	1	0.0118	1	1	0	0	0
417	PRS7_HUMAN	26S protease regulatory subunit 7 OS=Homo sapiens GN=PSMC2 PE=1 SV=3	49 kDa	0.316	9	9	0.252	8	8	0.242	8	8	0.0855	3	3	0.0831	3	3	0.0855	3	3
418	PSD13_HUMAN	26S proteasome non-ATPase regulatory subunit 13 OS=Homo sapiens GN=PSMD13 PE=1 SV=2	43 kDa	0.16	4	4	0.141	4	4	0.141	4	4	0.197	6	6	0.197	6	6	0.184	5	5
419	RS6_HUMAN	40S ribosomal protein S6 OS=Homo sapiens GN=RPS6 PE=1 SV=1	29 kDa	0.253	7	7	0.253	7	7	0.217	5	5	0.189	4	4	0.233	5	5	0.189	4	4
420	SPRE_HUMAN	Sepiapterin reductase OS=Homo sapiens GN=SPR PE=1 SV=1	28 kDa	0.188	3	3	0.172	3	3	0.23	4	4	0.23	4	4	0.23	4	4	0.23	4	4
421.1	AL3A2_HUMAN	Fatty aldehyde dehydrogenase OS=Homo sapiens GN=ALDH3A2 PE=1 SV=1	55 kDa	0.196	7	6	0.134	5	4	0.171	6	6	0.0639	2	2	0.0825	3	3	0.0639	2	2
421.2	AL3A1_HUMAN	Aldehyde dehydrogenase, dimeric NADP-preferring OS=Homo sapiens GN=ALDH3A1 PE=1 SV=3	50 kDa	0.0265	1	0	0	0	0	0	0	0	0	0	0	0	0	0	0	0	0
421.3	AL3B2_HUMAN	Aldehyde dehydrogenase family 3 member B2 OS=Homo sapiens GN=ALDH3B2 PE=2 SV=3	43 kDa	0	0	0	0	0	0	0	0	0	0	0	0	0	0	0	0	0	0
422	ALDR_HUMAN	Aldose reductase OS=Homo sapiens GN=AKR1B1 PE=1 SV=3	36 kDa	0.152	3	3	0.184	4	3	0.177	5	4	0.212	4	4	0.155	4	4	0.117	3	2
423	FUBP2_HUMAN	Far upstream element-binding protein 2 OS=Homo sapiens GN=KHSRP PE=1 SV=4	73 kDa	0.145	8	7	0.134	7	7	0.152	8	8	0.115	6	6	0.0816	4	4	0.105	5	5
424	GABT_HUMAN	4-aminobutyrate aminotransferase, mitochondrial OS=Homo sapiens GN=ABAT PE=1 SV=3	56 kDa	0.098	3	3	0.158	5	5	0.154	5	5	0.174	6	6	0.118	4	4	0.224	8	8
425.1	MYO1B_HUMAN	Unconventional myosin-Ib OS=Homo sapiens GN=MYO1B PE=2 SV=3	132 kDa	0.0722	5	4	0.0519	4	3	0.0599	5	3	0.044	3	3	0.0528	4	4	0.0519	4	3
425.2	MYO1A_HUMAN	Unconventional myosin-Ia OS=Homo sapiens GN=MYO1A PE=1 SV=1	118 kDa	0	0	0	0.0163	1	0	0.0249	2	0	0	0	0	0	0	0	0	0	0
426	SC31A_HUMAN	Protein transport protein Sec31A OS=Homo sapiens GN=SEC31A PE=1 SV=3	133 kDa	0.0484	4	4	0.0451	4	4	0.0951	7	7	0.0959	6	6	0.0492	4	4	0.0803	5	5
427	STML2_HUMAN	Stomatin-like protein 2 OS=Homo sapiens GN=STOML2 PE=1 SV=1	39 kDa	0.101	2	2	0.154	3	3	0.0421	1	1	0.146	3	3	0.149	3	3	0.149	3	3
428	THOC4_HUMAN	THO complex subunit 4 OS=Homo sapiens GN=ALYREF PE=1 SV=3	27 kDa	0.311	4	4	0.311	4	4	0.35	5	5	0.0817	2	2	0.0817	2	2	0.214	3	3
429	DYL1_HUMAN	Dynein light chain 1, cytoplasmic OS=Homo sapiens GN=DYNLL1 PE=1 SV=1	10 kDa	0.124	1	1	0.371	2	2	0.506	3	3	0.124	1	1	0.124	1	1	0.371	2	2
430	DHX15_HUMAN	Putative pre-mRNA-splicing factor ATP-dependent RNA helicase DHX15 OS=Homo sapiens GN=DHX15 PE=1 SV=2	91 kDa	0.104	5	5	0.0893	5	5	0.0893	5	5	0.0792	4	4	0.0314	2	2	0.0314	2	2
431	G3BP1_HUMAN	Ras GTPase-activating protein-binding protein 1 OS=Homo sapiens GN=G3BP1 PE=1 SV=1	52 kDa	0.202	6	5	0.176	5	4	0.133	4	3	0.101	3	3	0.0515	2	2	0.0773	3	3
432	K6PL_HUMAN	6-phosphofructokinase, liver type OS=Homo sapiens GN=PFKL PE=1 SV=6	85 kDa	0.105	5	5	0.119	6	6	0.127	6	6	0.142	6	6	0.119	6	6	0.1	5	5
433	PSA4_HUMAN	Proteasome subunit alpha type-4 OS=Homo sapiens GN=PSMA4 PE=1 SV=1	29 kDa	0.326	5	5	0.299	6	6	0.226	3	3	0.349	6	6	0.383	7	7	0.207	3	3
434	RL14_HUMAN	60S ribosomal protein L14 OS=Homo sapiens GN=RPL14 PE=1 SV=4	23 kDa	0.153	3	3	0.153	3	3	0.209	4	4	0.209	4	4	0.209	4	4	0.209	4	4
435	SYDC_HUMAN	Aspartate--tRNA ligase, cytoplasmic OS=Homo sapiens GN=DARS PE=1 SV=2	57 kDa	0.112	5	5	0.17	7	7	0.0998	4	4	0.15	6	6	0.18	7	7	0.11	4	4
436	VIGLN_HUMAN	Vigilin OS=Homo sapiens GN=HDLBP PE=1 SV=2	141 kDa	0.0442	4	4	0.0741	7	7	0.0923	8	8	0.0686	6	6	0.0363	3	3	0.0789	7	7
437	ANM1_HUMAN	Protein arginine N-methyltransferase 1 OS=Homo sapiens GN=PRMT1 PE=1 SV=2	42 kDa	0.141	4	4	0.183	5	5	0.141	4	4	0.183	5	5	0.227	6	6	0.163	4	4
438	ERO1A_HUMAN	ERO1-like protein alpha OS=Homo sapiens GN=ERO1L PE=1 SV=2	54 kDa	0.301	8	8	0.1	3	3	0.188	5	5	0.226	6	6	0.062	2	2	0.256	7	7
439	TIF1B_HUMAN	Transcription intermediary factor 1-beta OS=Homo sapiens GN=TRIM28 PE=1 SV=5	89 kDa	0.0982	6	6	0.0671	4	4	0.091	5	5	0.0946	5	5	0.0862	5	5	0.091	5	5
440.1	RHOA_HUMAN	Transforming protein RhoA OS=Homo sapiens GN=RHOA PE=1 SV=1	22 kDa	0.264	5	1	0.326	6	2	0.326	6	2	0.135	3	0	0.135	3	0	0.119	3	0
440.2	RHOC_HUMAN	Rho-related GTP-binding protein RhoC OS=Homo sapiens GN=RHOC PE=1 SV=1	22 kDa	0.176	4	0	0.176	4	0	0.176	4	0	0.135	3	0	0.135	3	0	0.119	3	0
441	CNDP2_HUMAN	Cytosolic non-specific dipeptidase OS=Homo sapiens GN=CNDP2 PE=1 SV=2	53 kDa	0.24	7	7	0.168	4	4	0.189	5	5	0.16	4	4	0.196	5	5	0.124	3	3
442	NUDT5_HUMAN	ADP-sugar pyrophosphatase OS=Homo sapiens GN=NUDT5 PE=1 SV=1	24 kDa	0.311	5	5	0.178	4	4	0.269	4	4	0.0594	1	1	0.265	3	3	0.269	3	3
443	PRS8_HUMAN	26S protease regulatory subunit 8 OS=Homo sapiens GN=PSMC5 PE=1 SV=1	46 kDa	0.0862	2	2	0.249	6	6	0.229	6	6	0.244	6	6	0.133	3	3	0.224	6	6
444	QOR_HUMAN	Quinone oxidoreductase OS=Homo sapiens GN=CRYZ PE=1 SV=1	35 kDa	0.219	4	4	0.185	4	4	0.167	3	3	0.213	4	4	0.213	4	4	0.246	5	5
445	RL18A_HUMAN	60S ribosomal protein L18a OS=Homo sapiens GN=RPL18A PE=1 SV=2	21 kDa	0.227	4	4	0.176	3	3	0.227	4	4	0.222	4	4	0.222	4	4	0.222	4	4
446	SLIRP_HUMAN	SRA stem-loop-interacting RNA-binding protein, mitochondrial OS=Homo sapiens GN=SLIRP PE=1 SV=1	12 kDa	0.431	4	4	0.339	3	3	0.431	4	4	0.56	5	5	0.45	4	4	0.651	6	6
447	RS26_HUMAN	40S ribosomal protein S26 OS=Homo sapiens GN=RPS26 PE=1 SV=3	13 kDa	0.339	3	3	0.339	3	3	0.339	3	3	0.339	3	3	0.339	3	3	0.339	3	3
448	CY1_HUMAN	Cytochrome c1, heme protein, mitochondrial OS=Homo sapiens GN=CYC1 PE=1 SV=3	35 kDa	0.111	2	2	0.111	2	2	0.0738	1	1	0.111	2	2	0.16	3	3	0.16	3	3
449	DKC1_HUMAN	H/ACA ribonucleoprotein complex subunit 4 OS=Homo sapiens GN=DKC1 PE=1 SV=3	58 kDa	0.121	4	4	0.152	5	5	0.148	4	4	0.163	5	5	0.204	6	6	0.138	4	4
450	DOPD_HUMAN	D-dopachrome decarboxylase OS=Homo sapiens GN=DDT PE=1 SV=3	13 kDa	0.347	4	4	0.398	4	4	0.339	3	3	0.432	4	4	0.398	4	4	0.331	3	3
451	PSMD3_HUMAN	26S proteasome non-ATPase regulatory subunit 3 OS=Homo sapiens GN=PSMD3 PE=1 SV=2	61 kDa	0.0787	3	3	0.103	4	4	0.0843	3	3	0.0974	4	4	0.103	4	4	0.109	4	4
452	DPP4_HUMAN	Dipeptidyl peptidase 4 OS=Homo sapiens GN=DPP4 PE=1 SV=2	88 kDa	0.0679	4	4	0.0809	5	5	0.0809	5	5	0.0809	5	5	0.0744	5	5	0.0548	4	4
453.1	DPYL2_HUMAN	Dihydropyrimidinase-related protein 2 OS=Homo sapiens GN=DPYSL2 PE=1 SV=1	62 kDa	0.194	6	5	0.145	5	4	0.194	7	6	0.143	5	4	0.135	5	4	0.138	4	4
453.2	DPYL1_HUMAN	Dihydropyrimidinase-related protein 1 OS=Homo sapiens GN=CRMP1 PE=1 SV=1	62 kDa	0	0	0	0	0	0	0	0	0	0	0	0	0	0	0	0	0	0
454	ITB1_HUMAN	Integrin beta-1 OS=Homo sapiens GN=ITGB1 PE=1 SV=2	88 kDa	0.1	4	4	0.0551	3	3	0.0865	3	3	0.114	5	5	0.0414	2	2	0.0677	3	3
455	TECR_HUMAN	Trans-2,3-enoyl-CoA reductase OS=Homo sapiens GN=TECR PE=1 SV=1	36 kDa	0.123	4	4	0.149	4	4	0.149	5	5	0.146	5	5	0.172	5	5	0.12	4	4
456	NOP58_HUMAN	Nucleolar protein 58 OS=Homo sapiens GN=NOP58 PE=1 SV=1	60 kDa	0.13	5	5	0.104	4	4	0.108	5	5	0.155	6	6	0.104	4	4	0.129	5	5
457	SEPT2_HUMAN	Septin-2 OS=Homo sapiens GN=SEPT2 PE=1 SV=1	41 kDa	0.233	5	5	0.219	5	5	0.335	7	7	0.266	6	6	0.227	6	6	0.177	4	4
458	SMD2_HUMAN	Small nuclear ribonucleoprotein Sm D2 OS=Homo sapiens GN=SNRPD2 PE=1 SV=1	14 kDa	0.483	5	5	0.483	5	5	0.483	5	5	0.246	2	2	0.246	2	2	0.314	3	3
459	SYIM_HUMAN	Isoleucine--tRNA ligase, mitochondrial OS=Homo sapiens GN=IARS2 PE=1 SV=2	114 kDa	0.0593	4	4	0.0494	3	3	0.0741	5	5	0.0781	5	5	0.0553	4	4	0.0543	3	3
460	SYYC_HUMAN	Tyrosine--tRNA ligase, cytoplasmic OS=Homo sapiens GN=YARS PE=1 SV=4	59 kDa	0.0966	3	3	0.131	4	4	0.114	3	3	0.159	5	5	0.11	6	6	0.191	7	7
461	TBCA_HUMAN	Tubulin-specific chaperone A OS=Homo sapiens GN=TBCA PE=1 SV=3	13 kDa	0.463	4	4	0.463	4	4	0.389	3	3	0.389	3	3	0.389	3	3	0.389	3	3
462	CTND1_HUMAN	Catenin delta-1 OS=Homo sapiens GN=CTNND1 PE=1 SV=1	108 kDa	0.0795	5	5	0.0992	6	6	0.112	7	7	0.0744	5	5	0.0775	5	5	0.0847	5	5
463	GCSP_HUMAN	Glycine dehydrogenase [decarboxylating], mitochondrial OS=Homo sapiens GN=GLDC PE=1 SV=2	113 kDa	0.0716	4	4	0.0853	5	5	0.107	6	6	0.0549	3	3	0.0765	4	4	0.0725	4	4
464	TR150_HUMAN	Thyroid hormone receptor-associated protein 3 OS=Homo sapiens GN=THRAP3 PE=1 SV=2	109 kDa	0.0649	4	4	0.0691	4	4	0.0513	3	3	0.0283	2	2	0.0419	3	3	0.0147	1	1
465	AK1A1_HUMAN	Alcohol dehydrogenase [NADP(+)] OS=Homo sapiens GN=AKR1A1 PE=1 SV=3	37 kDa	0.191	3	3	0.302	6	5	0.366	6	5	0.265	5	5	0.228	4	4	0.258	5	4
466	ESYT1_HUMAN	Extended synaptotagmin-1 OS=Homo sapiens GN=ESYT1 PE=1 SV=1	123 kDa	0.0815	5	5	0.0498	3	3	0.0815	5	5	0.0851	5	5	0.0362	3	3	0.0371	3	3
467	HS105_HUMAN	Heat shock protein 105 kDa OS=Homo sapiens GN=HSPH1 PE=1 SV=1	97 kDa	0.0839	5	4	0.0874	5	4	0.106	6	5	0.0932	6	5	0.134	7	6	0.127	7	6
468	PRS6A_HUMAN	26S protease regulatory subunit 6A OS=Homo sapiens GN=PSMC3 PE=1 SV=3	49 kDa	0.164	5	5	0.219	6	6	0.173	5	5	0.21	6	6	0.13	4	4	0.166	5	5
469	UBE2N_HUMAN	Ubiquitin-conjugating enzyme E2 N OS=Homo sapiens GN=UBE2N PE=1 SV=1	17 kDa	0.296	4	4	0.349	5	5	0.296	4	4	0.289	4	4	0.237	3	3	0.349	4	4
470	SMD1_HUMAN	Small nuclear ribonucleoprotein Sm D1 OS=Homo sapiens GN=SNRPD1 PE=1 SV=1	13 kDa	0.277	2	2	0.277	2	2	0.277	2	2	0.277	2	2	0.277	2	2	0.277	2	2
471	3HIDH_HUMAN	3-hydroxyisobutyrate dehydrogenase, mitochondrial OS=Homo sapiens GN=HIBADH PE=1 SV=2	35 kDa	0.131	3	3	0.196	3	3	0.196	4	4	0.193	4	4	0.179	4	4	0.25	5	5
472	GRPE1_HUMAN	GrpE protein homolog 1, mitochondrial OS=Homo sapiens GN=GRPEL1 PE=1 SV=2	24 kDa	0.309	5	5	0.309	5	5	0.309	5	5	0.221	4	4	0.221	4	4	0.29	4	4
473	MARE1_HUMAN	Microtubule-associated protein RP/EB family member 1 OS=Homo sapiens GN=MAPRE1 PE=1 SV=3	30 kDa	0.0672	1	1	0.104	2	2	0.243	4	4	0.104	2	2	0.142	2	2	0.179	3	3
474	MCM7_HUMAN	DNA replication licensing factor MCM7 OS=Homo sapiens GN=MCM7 PE=1 SV=4	81 kDa	0.161	8	8	0.11	5	5	0.107	5	5	0.089	4	4	0.0417	2	2	0.089	4	4
475	CYBP_HUMAN	Calcyclin-binding protein OS=Homo sapiens GN=CACYBP PE=1 SV=2	26 kDa	0.285	3	3	0.346	5	5	0.285	4	4	0.193	2	2	0.193	2	2	0.193	2	2
476	FUBP1_HUMAN	Far upstream element-binding protein 1 OS=Homo sapiens GN=FUBP1 PE=1 SV=3	68 kDa	0.161	7	6	0.137	6	6	0.168	7	7	0.0885	4	4	0.0839	4	4	0.0202	1	1
477	KYNU_HUMAN	Kynureninase OS=Homo sapiens GN=KYNU PE=1 SV=1	52 kDa	0.138	5	5	0.116	4	4	0.0667	2	2	0.0667	2	2	0.0925	3	3	0.0925	3	3
478	NDRG1_HUMAN	Protein NDRG1 OS=Homo sapiens GN=NDRG1 PE=1 SV=1	43 kDa	0.312	5	5	0.287	6	6	0.289	6	6	0	0	0	0	0	0	0	0	0
479	PSB1_HUMAN	Proteasome subunit beta type-1 OS=Homo sapiens GN=PSMB1 PE=1 SV=2	26 kDa	0.257	4	4	0.212	3	3	0.212	3	3	0.299	5	5	0.212	3	3	0.257	4	4
480	SYNC_HUMAN	Asparagine--tRNA ligase, cytoplasmic OS=Homo sapiens GN=NARS PE=1 SV=1	63 kDa	0.1	3	3	0.1	3	3	0.1	4	4	0.12	5	5	0.135	5	5	0.15	6	6
481	TXTP_HUMAN	Tricarboxylate transport protein, mitochondrial OS=Homo sapiens GN=SLC25A1 PE=1 SV=2	34 kDa	0.167	5	5	0.103	3	3	0.145	4	4	0.167	5	5	0.106	3	3	0.206	6	6
482	ABCD3_HUMAN	ATP-binding cassette sub-family D member 3 OS=Homo sapiens GN=ABCD3 PE=1 SV=1	75 kDa	0.0561	3	3	0.0349	2	2	0.0728	4	4	0.135	7	7	0.0865	4	4	0.143	7	7
483	CAND1_HUMAN	Cullin-associated NEDD8-dissociated protein 1 OS=Homo sapiens GN=CAND1 PE=1 SV=2	136 kDa	0.0398	4	4	0.0415	4	4	0.0764	7	7	0.065	6	6	0.0829	7	7	0.0561	5	5
484	LYAG_HUMAN	Lysosomal alpha-glucosidase OS=Homo sapiens GN=GAA PE=1 SV=4	105 kDa	0.0546	2	2	0.0924	4	4	0.111	5	5	0.0735	3	3	0.0452	2	2	0.0735	3	3
485	MAP4_HUMAN	Microtubule-associated protein 4 OS=Homo sapiens GN=MAP4 PE=1 SV=3	121 kDa	0.0495	4	4	0.0825	5	5	0.121	8	8	0.072	6	6	0.118	8	8	0.0894	5	5
486	RAC1_HUMAN	Ras-related C3 botulinum toxin substrate 1 OS=Homo sapiens GN=RAC1 PE=1 SV=1	21 kDa	0.365	7	6	0.286	5	4	0.266	5	5	0.208	3	2	0.208	3	2	0.151	2	2
487	RSMN_HUMAN	Small nuclear ribonucleoprotein-associated protein N OS=Homo sapiens GN=SNRPN PE=1 SV=1	25 kDa	0.125	3	3	0.0333	1	1	0.125	3	3	0.0667	2	2	0.0333	1	1	0.0667	2	2
488	DHB12_HUMAN	Estradiol 17-beta-dehydrogenase 12 OS=Homo sapiens GN=HSD17B12 PE=1 SV=2	34 kDa	0.0929	2	2	0.144	3	3	0.199	5	5	0.192	4	4	0.186	4	4	0.192	4	4
489	DIC_HUMAN	Mitochondrial dicarboxylate carrier OS=Homo sapiens GN=SLC25A10 PE=1 SV=2	31 kDa	0.223	4	4	0.146	3	3	0.223	4	4	0.185	4	4	0.146	3	3	0.293	7	7
490	THIM_HUMAN	3-ketoacyl-CoA thiolase, mitochondrial OS=Homo sapiens GN=ACAA2 PE=1 SV=2	42 kDa	0.184	4	4	0.0907	2	2	0.144	3	3	0.239	5	5	0.116	2	2	0.27	6	6
491	VPS35_HUMAN	Vacuolar protein sorting-associated protein 35 OS=Homo sapiens GN=VPS35 PE=1 SV=2	92 kDa	0.0302	2	2	0.0302	2	2	0.054	3	3	0.0967	6	6	0.0603	4	4	0.0716	4	4
492	RL24_HUMAN	60S ribosomal protein L24 OS=Homo sapiens GN=RPL24 PE=1 SV=1	18 kDa	0.191	3	3	0.134	2	2	0.134	2	2	0.191	3	3	0.14	2	2	0.191	3	3
493	ALDOC_HUMAN	Fructose-bisphosphate aldolase C OS=Homo sapiens GN=ALDOC PE=1 SV=2	39 kDa	0.225	4	3	0.192	4	3	0.192	4	3	0.148	3	2	0.148	3	2	0.14	2	1
494	CAPZB_HUMAN	F-actin-capping protein subunit beta OS=Homo sapiens GN=CAPZB PE=1 SV=4	31 kDa	0.231	4	4	0.231	4	4	0.181	3	3	0.123	2	2	0.245	4	4	0.209	4	4
495	ERP44_HUMAN	Endoplasmic reticulum resident protein 44 OS=Homo sapiens GN=ERP44 PE=1 SV=1	47 kDa	0.116	3	3	0.126	3	3	0.0911	2	2	0.14	4	4	0.135	4	4	0.116	3	3
496	NDUS1_HUMAN	NADH-ubiquinone oxidoreductase 75 kDa subunit, mitochondrial OS=Homo sapiens GN=NDUFS1 PE=1 SV=3	79 kDa	0.125	5	5	0.129	5	5	0.177	7	7	0.197	7	7	0.0578	2	2	0.11	4	4
497.1	IF4G1_HUMAN	Eukaryotic translation initiation factor 4 gamma 1 OS=Homo sapiens GN=EIF4G1 PE=1 SV=4	175 kDa	0.0507	6	4	0.0657	7	5	0.0425	5	3	0.0206	3	2	0.00813	1	0	0.0319	4	2
497.2	IF4G3_HUMAN	Eukaryotic translation initiation factor 4 gamma 3 OS=Homo sapiens GN=EIF4G3 PE=1 SV=2	177 kDa	0.0145	2	0	0	0	0	0.0145	2	0	0	0	0	0.0082	1	0	0	0	0
498	ARC1B_HUMAN	Actin-related protein 2/3 complex subunit 1B OS=Homo sapiens GN=ARPC1B PE=1 SV=3	41 kDa	0.156	3	2	0.142	3	3	0.142	3	3	0.169	4	4	0.169	4	4	0.169	4	4
499	CSK21_HUMAN	Casein kinase II subunit alpha OS=Homo sapiens GN=CSNK2A1 PE=1 SV=1	45 kDa	0.123	3	3	0.0972	2	2	0.184	4	4	0.207	5	5	0.0972	2	2	0.13	3	3
500	DHSA_HUMAN	Succinate dehydrogenase [ubiquinone] flavoprotein subunit, mitochondrial OS=Homo sapiens GN=SDHA PE=1 SV=2	73 kDa	0.119	4	4	0.0542	3	3	0.119	4	4	0.0497	3	3	0.0648	4	4	0.0663	4	4
501	NASP_HUMAN	Nuclear autoantigenic sperm protein OS=Homo sapiens GN=NASP PE=1 SV=2	85 kDa	0.11	6	6	0.11	6	6	0.0977	5	5	0.0571	3	3	0.0165	1	1	0.0571	3	3
502	PRS10_HUMAN	26S protease regulatory subunit 10B OS=Homo sapiens GN=PSMC6 PE=1 SV=1	44 kDa	0.149	4	4	0.105	4	4	0.149	4	4	0.149	4	4	0.129	4	4	0.149	4	4
503	BOLA2_HUMAN	BolA-like protein 2 OS=Homo sapiens GN=BOLA2 PE=1 SV=1	10 kDa	0.221	1	1	0.221	1	1	0.326	2	2	0.407	2	2	0.407	2	2	0.512	3	3
504	ARPC2_HUMAN	Actin-related protein 2/3 complex subunit 2 OS=Homo sapiens GN=ARPC2 PE=1 SV=1	34 kDa	0.107	3	3	0.15	4	4	0.197	5	5	0.207	5	5	0.127	3	3	0.12	3	3
505	FKBP4_HUMAN	Peptidyl-prolyl cis-trans isomerase FKBP4 OS=Homo sapiens GN=FKBP4 PE=1 SV=3	52 kDa	0.192	5	5	0.124	3	3	0.124	3	3	0.124	3	3	0.122	3	3	0.129	3	3
506	HSPB1_HUMAN	Heat shock protein beta-1 OS=Homo sapiens GN=HSPB1 PE=1 SV=2	23 kDa	0.283	4	4	0.21	3	3	0.468	5	5	0.161	2	2	0.346	3	3	0.161	2	2
507	LKHA4_HUMAN	Leukotriene A-4 hydrolase OS=Homo sapiens GN=LTA4H PE=1 SV=2	69 kDa	0.101	4	4	0.101	4	4	0.121	5	5	0.0786	3	3	0.106	4	4	0.101	4	4
508	PSA1_HUMAN	Proteasome subunit alpha type-1 OS=Homo sapiens GN=PSMA1 PE=1 SV=1	30 kDa	0.144	3	3	0.224	4	4	0.255	5	5	0.255	5	5	0.255	6	6	0.144	3	3
509	RALY_HUMAN	RNA-binding protein Raly OS=Homo sapiens GN=RALY PE=1 SV=1	32 kDa	0.307	4	4	0.137	3	3	0.137	3	3	0.17	4	4	0.17	4	4	0.17	4	4
510.1	RBMX_HUMAN	RNA-binding motif protein, X chromosome OS=Homo sapiens GN=RBMX PE=1 SV=3	42 kDa	0.179	6	5	0.0946	4	4	0.0742	3	3	0.143	5	3	0.087	3	2	0.087	3	3
510.2	RMXL3_HUMAN	RNA-binding motif protein, X-linked-like-3 OS=Homo sapiens GN=RBMXL3 PE=2 SV=2	115 kDa	0.0131	1	0	0	0	0	0	0	0	0	0	0	0	0	0	0	0	0
510.3	RMXL2_HUMAN	RNA-binding motif protein, X-linked-like-2 OS=Homo sapiens GN=RBMXL2 PE=1 SV=3	43 kDa	0	0	0	0	0	0	0	0	0	0	0	0	0	0	0	0	0	0
511	RL22_HUMAN	60S ribosomal protein L22 OS=Homo sapiens GN=RPL22 PE=1 SV=2	15 kDa	0.453	4	4	0.305	2	2	0.367	3	3	0.391	3	3	0.305	2	2	0.391	3	3
512	SYTC_HUMAN	Threonine--tRNA ligase, cytoplasmic OS=Homo sapiens GN=TARS PE=1 SV=3	83 kDa	0.0705	4	4	0.0581	3	3	0.0553	3	3	0.0982	5	5	0.129	6	6	0.0692	4	4
513	ATPG_HUMAN	ATP synthase subunit gamma, mitochondrial OS=Homo sapiens GN=ATP5C1 PE=1 SV=1	33 kDa	0.151	4	4	0.0805	2	2	0.0805	2	2	0.148	4	4	0.181	5	5	0.221	6	6
514	CLIC4_HUMAN	Chloride intracellular channel protein 4 OS=Homo sapiens GN=CLIC4 PE=1 SV=4	29 kDa	0.292	4	4	0.237	3	3	0.292	5	5	0.372	5	5	0.213	3	3	0.316	4	4
515	COX41_HUMAN	Cytochrome c oxidase subunit 4 isoform 1, mitochondrial OS=Homo sapiens GN=COX4I1 PE=1 SV=1	20 kDa	0.183	3	3	0.124	2	2	0.183	3	3	0.124	2	2	0.183	3	3	0.26	4	4
516	EST1_HUMAN	Liver carboxylesterase 1 OS=Homo sapiens GN=CES1 PE=1 SV=2	63 kDa	0.143	5	4	0.162	6	5	0.176	6	5	0.0776	3	3	0.0776	3	3	0.0582	2	2
517	IF2A_HUMAN	Eukaryotic translation initiation factor 2 subunit 1 OS=Homo sapiens GN=EIF2S1 PE=1 SV=3	36 kDa	0.0984	2	2	0.0635	1	1	0.187	3	3	0.152	2	2	0.222	4	4	0.133	3	3
518	LASP1_HUMAN	LIM and SH3 domain protein 1 OS=Homo sapiens GN=LASP1 PE=1 SV=2	30 kDa	0.326	5	5	0.375	5	5	0.326	5	5	0.218	2	2	0.0498	1	1	0.103	2	2
519	SYSC_HUMAN	Serine--tRNA ligase, cytoplasmic OS=Homo sapiens GN=SARS PE=1 SV=3	59 kDa	0.0331	2	2	0.0798	3	3	0.109	4	4	0.15	6	6	0.167	5	5	0.214	8	8
520	S61A1_HUMAN	Protein transport protein Sec61 subunit alpha isoform 1 OS=Homo sapiens GN=SEC61A1 PE=1 SV=2	52 kDa	0.063	2	2	0.042	1	1	0.042	1	1	0.0609	2	2	0.042	1	1	0.063	2	2
521	NCLN_HUMAN	Nicalin OS=Homo sapiens GN=NCLN PE=1 SV=2	63 kDa	0.0373	1	1	0.0373	1	1	0.0622	3	3	0.0373	1	1	0.0622	2	2	0.0622	2	2
522.1	UD19_HUMAN	UDP-glucuronosyltransferase 1-9 OS=Homo sapiens GN=UGT1A9 PE=1 SV=1	60 kDa	0.192	7	3	0.157	5	2	0.143	5	2	0.066	2	0	0.0264	1	0	0.0264	1	0
522.2	UD11_HUMAN	UDP-glucuronosyltransferase 1-1 OS=Homo sapiens GN=UGT1A1 PE=1 SV=1	60 kDa	0.165	6	2	0.114	4	1	0.114	4	1	0.0657	2	0	0.0263	1	0	0.0263	1	0
522.3	UD13_HUMAN	UDP-glucuronosyltransferase 1-3 OS=Homo sapiens GN=UGT1A3 PE=1 SV=1	60 kDa	0	0	0	0	0	0	0	0	0	0	0	0	0	0	0	0	0	0
522.4	UD14_HUMAN	UDP-glucuronosyltransferase 1-4 OS=Homo sapiens GN=UGT1A4 PE=1 SV=1	60 kDa	0	0	0	0	0	0	0	0	0	0	0	0	0	0	0	0	0	0
523	A2MG_HUMAN	Alpha-2-macroglobulin OS=Homo sapiens GN=A2M PE=1 SV=3	163 kDa	0.0896	7	7	0.0651	5	5	0.0651	5	5	0.0529	4	4	0.0278	2	2	0.00882	1	1
524	AHSA1_HUMAN	Activator of 90 kDa heat shock protein ATPase homolog 1 OS=Homo sapiens GN=AHSA1 PE=1 SV=1	38 kDa	0.121	2	2	0.107	2	2	0.121	2	2	0.163	4	4	0.107	2	2	0.107	2	2
525	ERP29_HUMAN	Endoplasmic reticulum resident protein 29 OS=Homo sapiens GN=ERP29 PE=1 SV=4	29 kDa	0.203	4	4	0.203	4	4	0.253	5	5	0.134	4	4	0.226	5	5	0.184	4	4
526	KCRB_HUMAN	Creatine kinase B-type OS=Homo sapiens GN=CKB PE=1 SV=1	43 kDa	0.202	4	4	0.186	4	4	0.312	6	6	0	0	0	0	0	0	0	0	0
527	MOGS_HUMAN	Mannosyl-oligosaccharide glucosidase OS=Homo sapiens GN=MOGS PE=1 SV=5	92 kDa	0.0717	4	4	0.0573	3	3	0.128	6	6	0.0705	4	4	0.055	3	3	0.0526	3	3
528	PRS4_HUMAN	26S protease regulatory subunit 4 OS=Homo sapiens GN=PSMC1 PE=1 SV=1	49 kDa	0.175	5	5	0.141	4	4	0.175	5	5	0.164	5	5	0.116	3	3	0.0364	1	1
529	PYGB_HUMAN	Glycogen phosphorylase, brain form OS=Homo sapiens GN=PYGB PE=1 SV=5	97 kDa	0.0605	4	3	0.0605	4	3	0.0605	4	3	0.0866	5	5	0.117	7	6	0.07	4	4
530	SQSTM_HUMAN	Sequestosome-1 OS=Homo sapiens GN=SQSTM1 PE=1 SV=1	48 kDa	0.18	4	4	0.145	3	3	0.075	2	2	0.075	2	2	0.075	2	2	0.075	2	2
531.1	KS6A3_HUMAN	Ribosomal protein S6 kinase alpha-3 OS=Homo sapiens GN=RPS6KA3 PE=1 SV=1	84 kDa	0.0486	3	0	0.1	5	3	0.17	8	5	0.0851	4	2	0.0392	2	1	0.0878	4	3
531.2	KS6A1_HUMAN	Ribosomal protein S6 kinase alpha-1 OS=Homo sapiens GN=RPS6KA1 PE=1 SV=2	83 kDa	0.0667	4	1	0.0544	3	1	0.112	6	3	0.0476	3	1	0.0218	1	0	0.0218	1	0
531.3	KS6A6_HUMAN	Ribosomal protein S6 kinase alpha-6 OS=Homo sapiens GN=RPS6KA6 PE=1 SV=1	84 kDa	0.0268	2	0	0	0	0	0	0	0	0	0	0	0	0	0	0	0	0
532.1	CDK6_HUMAN	Cyclin-dependent kinase 6 OS=Homo sapiens GN=CDK6 PE=1 SV=1	37 kDa	0.206	5	4	0.16	4	3	0.16	4	3	0.046	1	1	0.0828	2	2	0.0613	2	1
532.2	CDK1_HUMAN	Cyclin-dependent kinase 1 OS=Homo sapiens GN=CDK1 PE=1 SV=3	34 kDa	0.0774	2	1	0.114	3	2	0.0774	2	1	0	0	0	0	0	0	0	0	0
532.3	CDK2_HUMAN	Cyclin-dependent kinase 2 OS=Homo sapiens GN=CDK2 PE=1 SV=2	34 kDa	0.0738	2	1	0	0	0	0.0738	2	1	0	0	0	0	0	0	0	0	0
532.4	CDK18_HUMAN	Cyclin-dependent kinase 18 OS=Homo sapiens GN=CDK18 PE=1 SV=3	54 kDa	0.0169	1	0	0	0	0	0	0	0	0	0	0	0	0	0	0	0	0
532.5	CDK12_HUMAN	Cyclin-dependent kinase 12 OS=Homo sapiens GN=CDK12 PE=1 SV=2	164 kDa	0.00537	1	0	0.00537	1	0	0	0	0	0	0	0	0	0	0	0	0	0
532.6	CDK13_HUMAN	Cyclin-dependent kinase 13 OS=Homo sapiens GN=CDK13 PE=1 SV=2	165 kDa	0.00529	1	0	0	0	0	0	0	0	0	0	0	0	0	0	0	0	0
532.7	CDK15_HUMAN	Cyclin-dependent kinase 15 OS=Homo sapiens GN=CDK15 PE=2 SV=2	49 kDa	0.0184	1	0	0	0	0	0	0	0	0	0	0	0	0	0	0	0	0
532.8	CDK17_HUMAN	Cyclin-dependent kinase 17 OS=Homo sapiens GN=CDK17 PE=1 SV=2	60 kDa	0.0153	1	0	0	0	0	0	0	0	0	0	0	0	0	0	0	0	0
532.9	CDK16_HUMAN	Cyclin-dependent kinase 16 OS=Homo sapiens GN=CDK16 PE=1 SV=1	56 kDa	0	0	0	0.0161	1	0	0	0	0	0	0	0	0	0	0	0	0	0
533	CO3_HUMAN	Complement C3 OS=Homo sapiens GN=C3 PE=1 SV=2	187 kDa	0.0866	8	8	0.0704	7	7	0.103	11	11	0.00601	1	1	0	0	0	0	0	0
534	PIMT_HUMAN	Protein-L-isoaspartate(D-aspartate) O-methyltransferase OS=Homo sapiens GN=PCMT1 PE=1 SV=4	25 kDa	0.401	4	4	0.401	4	4	0.326	4	4	0.211	2	2	0.401	4	4	0.335	4	4
535	SERB_HUMAN	Phosphoserine phosphatase OS=Homo sapiens GN=PSPH PE=1 SV=2	25 kDa	0.116	2	2	0.209	4	4	0.209	4	4	0.249	5	5	0.209	4	4	0.249	5	5
536	TADBP_HUMAN	TAR DNA-binding protein 43 OS=Homo sapiens GN=TARDBP PE=1 SV=1	45 kDa	0.111	3	3	0.111	3	3	0.111	3	3	0.111	3	3	0.114	3	3	0.087	2	2
537	TM9S2_HUMAN	Transmembrane 9 superfamily member 2 OS=Homo sapiens GN=TM9SF2 PE=1 SV=1	76 kDa	0.0513	2	2	0.0452	2	2	0.0287	1	1	0.0664	3	3	0.0498	2	2	0.0724	3	3
538.1	RS27L_HUMAN	40S ribosomal protein S27-like OS=Homo sapiens GN=RPS27L PE=1 SV=3	9 kDa	0.31	2	1	0.31	2	1	0.31	2	1	0.286	2	1	0.286	2	1	0.381	3	1
538.2	RS27_HUMAN	40S ribosomal protein S27 OS=Homo sapiens GN=RPS27 PE=1 SV=3	9 kDa	0.31	2	1	0.31	2	1	0.298	2	1	0.31	2	1	0.155	1	0	0.25	2	0
539	PEG10_HUMAN	Retrotransposon-derived protein PEG10 OS=Homo sapiens GN=PEG10 PE=1 SV=2	80 kDa	0.164	6	6	0.0989	4	4	0.144	5	5	0.0805	3	3	0.048	2	2	0.048	2	2
540	PNPO_HUMAN	Pyridoxine-5'-phosphate oxidase OS=Homo sapiens GN=PNPO PE=1 SV=1	30 kDa	0.218	3	3	0.276	4	4	0.31	5	5	0.142	2	2	0.142	2	2	0.142	2	2
541	RCC1_HUMAN	Regulator of chromosome condensation OS=Homo sapiens GN=RCC1 PE=1 SV=1	45 kDa	0.147	3	3	0.147	3	3	0.147	3	3	0.0356	1	1	0.0808	2	2	0.112	3	3
542	RL11_HUMAN	60S ribosomal protein L11 OS=Homo sapiens GN=RPL11 PE=1 SV=2	20 kDa	0.129	2	2	0.129	2	2	0.129	2	2	0.129	2	2	0.129	2	2	0.129	2	2
543	ARK72_HUMAN	Aflatoxin B1 aldehyde reductase member 2 OS=Homo sapiens GN=AKR7A2 PE=1 SV=3	40 kDa	0.209	4	4	0.209	4	4	0.156	3	3	0.167	3	3	0.0808	1	1	0.156	3	3
544	ASSY_HUMAN	Argininosuccinate synthase OS=Homo sapiens GN=ASS1 PE=1 SV=2	47 kDa	0	0	0	0.0316	1	1	0.129	3	3	0.107	3	3	0.107	3	3	0.153	4	4
545	ECHP_HUMAN	Peroxisomal bifunctional enzyme OS=Homo sapiens GN=EHHADH PE=1 SV=3	79 kDa	0.0719	3	3	0.0871	4	4	0.0871	4	4	0.0609	3	3	0.0719	4	4	0.111	5	5
546	ECI2_HUMAN	Enoyl-CoA delta isomerase 2, mitochondrial OS=Homo sapiens GN=ECI2 PE=1 SV=4	44 kDa	0.155	3	3	0.104	2	2	0.137	3	3	0.226	5	5	0.16	3	3	0.236	5	5
547	ESTD_HUMAN	S-formylglutathione hydrolase OS=Homo sapiens GN=ESD PE=1 SV=2	31 kDa	0.177	3	3	0.22	4	4	0.255	4	4	0.259	4	4	0.0709	1	1	0.259	4	4
548	GRHPR_HUMAN	Glyoxylate reductase/hydroxypyruvate reductase OS=Homo sapiens GN=GRHPR PE=1 SV=1	36 kDa	0.149	3	3	0.0427	1	1	0.207	4	4	0.256	5	5	0.116	2	2	0.168	3	3
549	IF4G2_HUMAN	Eukaryotic translation initiation factor 4 gamma 2 OS=Homo sapiens GN=EIF4G2 PE=1 SV=1	102 kDa	0.0485	3	3	0.0584	4	4	0.0584	4	4	0.0772	5	5	0.0485	4	4	0.075	5	5
550	IPO7_HUMAN	Importin-7 OS=Homo sapiens GN=IPO7 PE=1 SV=1	120 kDa	0.0299	2	2	0.0414	3	3	0.0925	6	6	0.0424	3	3	0.0462	3	3	0.0462	3	3
551	KCY_HUMAN	UMP-CMP kinase OS=Homo sapiens GN=CMPK1 PE=1 SV=3	22 kDa	0.291	5	5	0.25	4	4	0.235	3	3	0.23	3	3	0.23	3	3	0.23	3	3
552	RUVB1_HUMAN	RuvB-like 1 OS=Homo sapiens GN=RUVBL1 PE=1 SV=1	50 kDa	0.107	4	4	0.121	4	4	0.121	4	4	0.154	5	5	0.171	5	5	0.162	5	5
553	THTM_HUMAN	3-mercaptopyruvate sulfurtransferase OS=Homo sapiens GN=MPST PE=1 SV=3	33 kDa	0.121	2	2	0.121	2	2	0.172	3	3	0.263	4	4	0.263	4	4	0.263	4	4
554	USO1_HUMAN	General vesicular transport factor p115 OS=Homo sapiens GN=USO1 PE=1 SV=2	108 kDa	0.0478	3	3	0.0478	3	3	0.0509	3	3	0.114	6	6	0.027	2	2	0.0166	1	1
555	VATA_HUMAN	V-type proton ATPase catalytic subunit A OS=Homo sapiens GN=ATP6V1A PE=1 SV=2	68 kDa	0.113	4	4	0.113	4	4	0.113	4	4	0.0713	3	3	0.109	5	5	0.0276	1	1
556	CN166_HUMAN	UPF0568 protein C14orf166 OS=Homo sapiens GN=C14orf166 PE=1 SV=1	28 kDa	0.201	3	3	0.168	2	2	0.168	2	2	0.152	3	3	0.152	3	3	0.201	3	3
557.1	ARL8B_HUMAN	ADP-ribosylation factor-like protein 8B OS=Homo sapiens GN=ARL8B PE=1 SV=1	22 kDa	0.129	1	0	0.215	2	1	0.129	2	0	0.215	3	1	0.124	1	0	0.215	3	1
557.2	ARL8A_HUMAN	ADP-ribosylation factor-like protein 8A OS=Homo sapiens GN=ARL8A PE=1 SV=1	21 kDa	0.129	1	0	0	0	0	0.129	2	0	0.129	2	0	0	0	0	0.129	2	0
558	ARF1_HUMAN	ADP-ribosylation factor 1 OS=Homo sapiens GN=ARF1 PE=1 SV=2	21 kDa	0.343	5	3	0.343	5	3	0.359	5	3	0.547	7	4	0.381	5	3	0.547	7	4
559	ELAV1_HUMAN	ELAV-like protein 1 OS=Homo sapiens GN=ELAVL1 PE=1 SV=2	36 kDa	0.15	4	4	0.206	5	5	0.15	4	4	0.15	4	4	0.117	3	3	0.117	3	3
560	PSMD6_HUMAN	26S proteasome non-ATPase regulatory subunit 6 OS=Homo sapiens GN=PSMD6 PE=1 SV=1	46 kDa	0.152	4	4	0.103	3	3	0.147	4	4	0.126	4	4	0.134	4	4	0.116	4	4
561	TTL12_HUMAN	Tubulin--tyrosine ligase-like protein 12 OS=Homo sapiens GN=TTLL12 PE=1 SV=2	74 kDa	0.132	4	4	0.172	5	5	0.179	5	5	0.158	5	5	0.138	4	4	0.172	5	5
562	A1AT_HUMAN	Alpha-1-antitrypsin OS=Homo sapiens GN=SERPINA1 PE=1 SV=3	47 kDa	0.129	4	4	0.0861	3	3	0.0861	3	3	0.0239	1	1	0.0837	3	3	0.11	4	4
563	ARF4_HUMAN	ADP-ribosylation factor 4 OS=Homo sapiens GN=ARF4 PE=1 SV=3	21 kDa	0.278	4	2	0.361	5	3	0.361	5	3	0.472	6	3	0.361	5	3	0.606	8	5
564	ARP2_HUMAN	Actin-related protein 2 OS=Homo sapiens GN=ACTR2 PE=1 SV=1	45 kDa	0.16	4	4	0.102	3	3	0.19	5	5	0.102	3	3	0.124	4	4	0.0939	3	3
565	COX5B_HUMAN	Cytochrome c oxidase subunit 5B, mitochondrial OS=Homo sapiens GN=COX5B PE=1 SV=2	14 kDa	0.302	3	3	0.302	4	4	0.302	4	4	0.256	4	4	0.256	3	3	0.256	3	3
566	HCD2_HUMAN	3-hydroxyacyl-CoA dehydrogenase type-2 OS=Homo sapiens GN=HSD17B10 PE=1 SV=3	27 kDa	0.103	1	1	0.238	3	3	0.238	3	3	0.28	5	5	0.284	5	5	0.314	5	5
567	HNRL1_HUMAN	Heterogeneous nuclear ribonucleoprotein U-like protein 1 OS=Homo sapiens GN=HNRNPUL1 PE=1 SV=2	96 kDa	0.0724	4	4	0.0946	5	5	0.0771	4	4	0.0771	4	4	0.0771	4	4	0.0467	3	3
568	MANF_HUMAN	Mesencephalic astrocyte-derived neurotrophic factor OS=Homo sapiens GN=MANF PE=1 SV=3	21 kDa	0.148	2	2	0.148	2	2	0.148	2	2	0.247	4	4	0.247	4	4	0.154	4	4
569	MCM3_HUMAN	DNA replication licensing factor MCM3 OS=Homo sapiens GN=MCM3 PE=1 SV=3	91 kDa	0.0557	4	4	0.0718	5	5	0.0557	4	4	0.0718	4	4	0.026	1	1	0.0272	2	2
570	MCM4_HUMAN	DNA replication licensing factor MCM4 OS=Homo sapiens GN=MCM4 PE=1 SV=5	97 kDa	0.116	6	6	0.107	5	5	0.107	5	5	0.0382	2	2	0.0185	1	1	0.0185	1	1
571	REEP6_HUMAN	Receptor expression-enhancing protein 6 OS=Homo sapiens GN=REEP6 PE=1 SV=1	21 kDa	0.179	3	3	0.125	2	2	0.223	4	4	0.0707	1	1	0.114	2	2	0.114	2	2
572	RL31_HUMAN	60S ribosomal protein L31 OS=Homo sapiens GN=RPL31 PE=1 SV=1	14 kDa	0.248	3	3	0.32	4	4	0.32	4	4	0.312	4	4	0.28	4	4	0.24	3	3
573	RNT2_HUMAN	Ribonuclease T2 OS=Homo sapiens GN=RNASET2 PE=1 SV=2	29 kDa	0.281	5	5	0.281	5	5	0.281	5	5	0.0391	1	1	0.0391	1	1	0.0391	1	1
574	SKP1_HUMAN	S-phase kinase-associated protein 1 OS=Homo sapiens GN=SKP1 PE=1 SV=2	19 kDa	0.448	5	5	0.399	4	4	0.27	3	3	0.307	4	4	0.307	3	3	0.307	4	4
575	RS28_HUMAN	40S ribosomal protein S28 OS=Homo sapiens GN=RPS28 PE=1 SV=1	8 kDa	0.464	3	3	0.304	2	2	0.304	2	2	0.304	2	2	0.304	2	2	0.304	2	2
576.1	KINH_HUMAN	Kinesin-1 heavy chain OS=Homo sapiens GN=KIF5B PE=1 SV=1	110 kDa	0.0218	1	1	0.0748	5	4	0.0405	3	2	0.0498	4	4	0.0374	3	3	0.0488	4	4
576.2	KIF5A_HUMAN	Kinesin heavy chain isoform 5A OS=Homo sapiens GN=KIF5A PE=1 SV=2	117 kDa	0	0	0	0.0126	1	0	0	0	0	0	0	0	0	0	0	0	0	0
576.3	KIF5C_HUMAN	Kinesin heavy chain isoform 5C OS=Homo sapiens GN=KIF5C PE=1 SV=1	109 kDa	0	0	0	0	0	0	0.0136	1	0	0	0	0	0	0	0	0	0	0
577	BAP31_HUMAN	B-cell receptor-associated protein 31 OS=Homo sapiens GN=BCAP31 PE=1 SV=3	28 kDa	0.102	2	2	0.167	3	3	0.203	4	4	0.167	3	3	0.065	1	1	0.065	1	1
578	DHSO_HUMAN	Sorbitol dehydrogenase OS=Homo sapiens GN=SORD PE=1 SV=4	38 kDa	0.14	3	3	0.112	3	3	0.162	4	4	0.0728	2	2	0.0728	2	2	0.0728	2	2
579	LRC47_HUMAN	Leucine-rich repeat-containing protein 47 OS=Homo sapiens GN=LRRC47 PE=1 SV=1	63 kDa	0.0961	4	4	0.0995	4	4	0.13	5	5	0.118	5	5	0.0943	4	4	0.0978	4	4
580	RBBP4_HUMAN	Histone-binding protein RBBP4 OS=Homo sapiens GN=RBBP4 PE=1 SV=3	48 kDa	0.172	5	3	0.122	3	2	0.151	4	3	0.101	2	2	0.151	4	2	0.0588	2	1
581	TBRG4_HUMAN	Protein TBRG4 OS=Homo sapiens GN=TBRG4 PE=1 SV=1	71 kDa	0.0713	3	3	0.106	4	4	0.116	4	4	0.0824	3	3	0.0349	1	1	0.0634	2	2
582	TSN_HUMAN	Translin OS=Homo sapiens GN=TSN PE=1 SV=1	26 kDa	0.202	4	4	0.285	6	6	0.158	3	3	0.197	3	3	0.197	3	3	0.237	4	4
583	UBP5_HUMAN	Ubiquitin carboxyl-terminal hydrolase 5 OS=Homo sapiens GN=USP5 PE=1 SV=2	96 kDa	0.0944	4	4	0.0734	4	4	0.0641	3	3	0.107	5	5	0.0886	4	4	0.0455	2	2
584	XPO5_HUMAN	Exportin-5 OS=Homo sapiens GN=XPO5 PE=1 SV=1	136 kDa	0.00831	1	1	0.00831	1	1	0.0233	2	2	0.0349	3	3	0.0399	3	3	0.0349	3	3
585	GSH1_HUMAN	Glutamate--cysteine ligase catalytic subunit OS=Homo sapiens GN=GCLC PE=1 SV=2	73 kDa	0.0942	4	4	0.0738	3	3	0.0801	3	3	0.0424	2	2	0.0801	3	3	0.0989	4	4
586	IF2B3_HUMAN	Insulin-like growth factor 2 mRNA-binding protein 3 OS=Homo sapiens GN=IGF2BP3 PE=1 SV=2	64 kDa	0.133	5	3	0.138	5	3	0.166	6	4	0.169	7	4	0.102	4	2	0.128	5	4
587	LEG3_HUMAN	Galectin-3 OS=Homo sapiens GN=LGALS3 PE=1 SV=5	26 kDa	0.1	2	2	0.1	2	2	0.1	2	2	0.1	2	2	0.144	3	3	0.144	3	3
588	MCM2_HUMAN	DNA replication licensing factor MCM2 OS=Homo sapiens GN=MCM2 PE=1 SV=4	102 kDa	0.0542	4	4	0.116	7	7	0.103	6	6	0.0354	3	3	0.0232	2	2	0	0	0
589	SF01_HUMAN	Splicing factor 1 OS=Homo sapiens GN=SF1 PE=1 SV=4	68 kDa	0.0407	1	1	0.0829	3	3	0.0657	2	2	0.0986	4	4	0.0579	3	3	0.0782	4	4
590	SF3B2_HUMAN	Splicing factor 3B subunit 2 OS=Homo sapiens GN=SF3B2 PE=1 SV=2	100 kDa	0.0916	5	5	0.0603	4	4	0.105	5	5	0.0391	2	2	0.0715	3	3	0.0391	2	2
591	TCTP_HUMAN	Translationally-controlled tumor protein OS=Homo sapiens GN=TPT1 PE=1 SV=1	20 kDa	0.157	2	2	0.0814	1	1	0.157	2	2	0.157	2	2	0.157	2	2	0.157	2	2
592	COX1_HUMAN	Cytochrome c oxidase subunit 1 OS=Homo sapiens GN=MT-CO1 PE=1 SV=1	57 kDa	0	0	0	0	0	0	0.0604	1	1	0.076	2	2	0.076	2	2	0.0604	1	1
593	BAG2_HUMAN	BAG family molecular chaperone regulator 2 OS=Homo sapiens GN=BAG2 PE=1 SV=1	24 kDa	0.327	4	4	0.284	3	3	0.232	2	2	0.327	4	4	0.199	3	3	0.156	2	2
594	CNN2_HUMAN	Calponin-2 OS=Homo sapiens GN=CNN2 PE=1 SV=4	34 kDa	0.243	5	4	0.22	5	4	0.142	3	3	0.0518	1	1	0.0518	1	1	0.107	2	2
595	DECR_HUMAN	2,4-dienoyl-CoA reductase, mitochondrial OS=Homo sapiens GN=DECR1 PE=1 SV=1	36 kDa	0.122	2	2	0.122	2	2	0.122	2	2	0.188	3	3	0.197	4	4	0.221	4	4
596	GTF2I_HUMAN	General transcription factor II-I OS=Homo sapiens GN=GTF2I PE=1 SV=2	112 kDa	0.0641	4	4	0.0531	3	3	0.114	6	6	0	0	0	0	0	0	0	0	0
597	RL26_HUMAN	60S ribosomal protein L26 OS=Homo sapiens GN=RPL26 PE=1 SV=1	17 kDa	0.117	2	2	0.117	2	2	0.145	3	3	0.172	3	3	0.172	3	3	0.0621	1	1
598.1	E41L2_HUMAN	Band 4.1-like protein 2 OS=Homo sapiens GN=EPB41L2 PE=1 SV=1	113 kDa	0.0249	2	2	0.0348	3	3	0.0348	3	3	0.0697	5	5	0.0448	3	3	0.0507	3	3
598.2	E41L1_HUMAN	Band 4.1-like protein 1 OS=Homo sapiens GN=EPB41L1 PE=1 SV=2	99 kDa	0	0	0	0	0	0	0	0	0	0	0	0	0	0	0	0	0	0
599	DNJA1_HUMAN	DnaJ homolog subfamily A member 1 OS=Homo sapiens GN=DNAJA1 PE=1 SV=2	45 kDa	0.207	5	5	0.234	6	6	0.202	4	4	0.0957	2	2	0.0957	2	2	0.0957	2	2
600	EST2_HUMAN	Cocaine esterase OS=Homo sapiens GN=CES2 PE=1 SV=1	62 kDa	0.0805	3	3	0.134	5	5	0.134	5	5	0.106	4	4	0.0555	2	2	0.0447	2	2
601	LYPA2_HUMAN	Acyl-protein thioesterase 2 OS=Homo sapiens GN=LYPLA2 PE=1 SV=1	25 kDa	0.108	1	1	0.108	1	1	0.299	3	3	0.333	4	4	0.177	3	3	0.333	4	4
602	MCM5_HUMAN	DNA replication licensing factor MCM5 OS=Homo sapiens GN=MCM5 PE=1 SV=5	82 kDa	0.154	7	7	0.132	6	6	0.134	6	6	0.0763	4	4	0.0613	3	3	0.0286	2	2
603	PUR8_HUMAN	Adenylosuccinate lyase OS=Homo sapiens GN=ADSL PE=1 SV=2	55 kDa	0.107	3	3	0.132	3	3	0.151	4	4	0.151	4	4	0.151	4	4	0.132	3	3
604	RS24_HUMAN	40S ribosomal protein S24 OS=Homo sapiens GN=RPS24 PE=1 SV=1	15 kDa	0.203	3	3	0.203	3	3	0.0902	2	2	0.203	3	3	0.203	3	3	0.0902	2	2
605	TOP1_HUMAN	DNA topoisomerase 1 OS=Homo sapiens GN=TOP1 PE=1 SV=2	91 kDa	0.0314	2	2	0.0314	2	2	0.0314	2	2	0.0549	4	4	0.068	4	4	0.0157	1	1
606	ACSS3_HUMAN	Acyl-CoA synthetase short-chain family member 3, mitochondrial OS=Homo sapiens GN=ACSS3 PE=2 SV=1	75 kDa	0.0627	2	2	0.051	2	2	0.0904	3	3	0.0889	4	4	0.0962	4	4	0.122	5	5
607	AIFM1_HUMAN	Apoptosis-inducing factor 1, mitochondrial OS=Homo sapiens GN=AIFM1 PE=1 SV=1	67 kDa	0.0734	3	3	0.0914	4	4	0.148	6	6	0.0701	3	3	0.0522	2	2	0.0701	3	3
608	CATC_HUMAN	Dipeptidyl peptidase 1 OS=Homo sapiens GN=CTSC PE=1 SV=2	52 kDa	0.0972	3	3	0.0972	3	3	0.0972	3	3	0.0734	2	2	0.0259	1	1	0.0734	2	2
609	EF1D_HUMAN	Elongation factor 1-delta OS=Homo sapiens GN=EEF1D PE=1 SV=5	31 kDa	0.174	3	3	0.174	3	3	0.174	3	3	0.128	2	2	0.128	2	2	0.174	3	3
610	FEN1_HUMAN	Flap endonuclease 1 OS=Homo sapiens GN=FEN1 PE=1 SV=1	43 kDa	0.253	5	5	0.161	3	3	0.221	5	5	0.0816	2	2	0.0526	1	1	0.121	2	2
611	GSTK1_HUMAN	Glutathione S-transferase kappa 1 OS=Homo sapiens GN=GSTK1 PE=1 SV=3	25 kDa	0.186	3	3	0.115	2	2	0.235	4	4	0.239	4	4	0.239	4	4	0.239	4	4
612	HPPD_HUMAN	4-hydroxyphenylpyruvate dioxygenase OS=Homo sapiens GN=HPD PE=1 SV=2	45 kDa	0.084	2	2	0.107	3	3	0.107	3	3	0.084	2	2	0.109	3	3	0.084	2	2
613	PON2_HUMAN	Serum paraoxonase/arylesterase 2 OS=Homo sapiens GN=PON2 PE=1 SV=3	39 kDa	0.189	3	3	0.0847	2	2	0.26	5	5	0.215	4	4	0.0395	1	1	0.0904	1	1
614.1	RAB5C_HUMAN	Ras-related protein Rab-5C OS=Homo sapiens GN=RAB5C PE=1 SV=2	23 kDa	0.162	3	1	0.162	3	1	0.218	4	2	0.218	4	2	0.162	3	1	0.162	3	1
614.2	RAB5A_HUMAN	Ras-related protein Rab-5A OS=Homo sapiens GN=RAB5A PE=1 SV=2	24 kDa	0.0977	2	0	0.0977	2	0	0.0977	2	0	0.0977	2	0	0.0977	2	0	0.0977	2	0
615	THIK_HUMAN	3-ketoacyl-CoA thiolase, peroxisomal OS=Homo sapiens GN=ACAA1 PE=1 SV=2	44 kDa	0.212	6	6	0.172	5	5	0.238	7	7	0.137	3	3	0	0	0	0.066	1	1
616	TPD54_HUMAN	Tumor protein D54 OS=Homo sapiens GN=TPD52L2 PE=1 SV=2	22 kDa	0.117	2	2	0.209	3	3	0.209	3	3	0.272	4	4	0.417	5	5	0.272	4	4
617	SRP14_HUMAN	Signal recognition particle 14 kDa protein OS=Homo sapiens GN=SRP14 PE=1 SV=2	15 kDa	0.199	2	2	0.103	1	1	0.199	2	2	0.199	2	2	0.103	1	1	0.199	2	2
618	SSRD_HUMAN	Translocon-associated protein subunit delta OS=Homo sapiens GN=SSR4 PE=1 SV=1	19 kDa	0.168	2	2	0.168	2	2	0.168	2	2	0.173	2	2	0.173	2	2	0.168	2	2
619	RBP56_HUMAN	TATA-binding protein-associated factor 2N OS=Homo sapiens GN=TAF15 PE=1 SV=1	62 kDa	0.0591	2	2	0.0287	1	1	0.0591	2	2	0.0828	3	2	0.0828	3	2	0.0524	2	1
620	ABHEB_HUMAN	Abhydrolase domain-containing protein 14B OS=Homo sapiens GN=ABHD14B PE=1 SV=1	22 kDa	0.167	2	2	0.233	3	3	0.214	3	3	0.281	4	4	0.281	4	4	0.281	4	4
621	DIAP1_HUMAN	Protein diaphanous homolog 1 OS=Homo sapiens GN=DIAPH1 PE=1 SV=2	141 kDa	0.0299	3	3	0.0401	4	4	0.0299	3	3	0.0283	3	3	0.0283	3	3	0.0181	2	2
622	DNPEP_HUMAN	Aspartyl aminopeptidase OS=Homo sapiens GN=DNPEP PE=1 SV=1	52 kDa	0.0295	1	1	0.0611	2	2	0.126	3	3	0.0947	2	2	0.0947	2	2	0.0947	2	2
623	IQGA2_HUMAN	Ras GTPase-activating-like protein IQGAP2 OS=Homo sapiens GN=IQGAP2 PE=1 SV=4	181 kDa	0.0444	3	3	0.0444	3	3	0.0527	4	4	0.0254	3	3	0.0648	5	5	0.0381	3	3
624	PSA5_HUMAN	Proteasome subunit alpha type-5 OS=Homo sapiens GN=PSMA5 PE=1 SV=3	26 kDa	0.266	4	4	0.253	4	4	0.344	5	5	0.29	4	4	0.199	3	3	0.158	2	2
625	BAF_HUMAN	Barrier-to-autointegration factor OS=Homo sapiens GN=BANF1 PE=1 SV=1	10 kDa	0.292	2	2	0.292	2	2	0.292	2	2	0.27	1	1	0.27	1	1	0.27	1	1
626	COPD_HUMAN	Coatomer subunit delta OS=Homo sapiens GN=ARCN1 PE=1 SV=1	57 kDa	0.045	2	2	0.0705	3	3	0.0724	3	3	0.092	4	4	0.09	4	4	0.092	4	4
627	RCN1_HUMAN	Reticulocalbin-1 OS=Homo sapiens GN=RCN1 PE=1 SV=1	39 kDa	0.0967	2	2	0.0483	1	1	0.0967	2	2	0.0967	2	2	0.184	3	3	0.0967	2	2
628	UBF1_HUMAN	Nucleolar transcription factor 1 OS=Homo sapiens GN=UBTF PE=1 SV=1	89 kDa	0.0301	2	2	0.0131	1	1	0.0301	2	2	0	0	0	0.017	1	1	0	0	0
629	AIMP1_HUMAN	Aminoacyl tRNA synthase complex-interacting multifunctional protein 1 OS=Homo sapiens GN=AIMP1 PE=1 SV=2	34 kDa	0.154	3	3	0.154	3	3	0.208	4	4	0.218	4	4	0.192	4	4	0.154	3	3
630	EIF3F_HUMAN	Eukaryotic translation initiation factor 3 subunit F OS=Homo sapiens GN=EIF3F PE=1 SV=1	38 kDa	0.196	5	5	0.109	3	3	0.162	4	4	0.157	4	4	0.0308	1	1	0.115	3	3
631	MCM6_HUMAN	DNA replication licensing factor MCM6 OS=Homo sapiens GN=MCM6 PE=1 SV=1	93 kDa	0.0828	4	4	0.0365	2	2	0.0633	3	3	0.0512	3	3	0.0317	2	2	0.0317	2	2
632	NUCB1_HUMAN	Nucleobindin-1 OS=Homo sapiens GN=NUCB1 PE=1 SV=4	54 kDa	0.0672	2	2	0.139	5	5	0.121	4	4	0.0716	2	2	0.0738	2	2	0.0954	3	3
633	PDLI5_HUMAN	PDZ and LIM domain protein 5 OS=Homo sapiens GN=PDLIM5 PE=1 SV=5	64 kDa	0.0856	4	4	0.0805	4	4	0.0705	3	3	0.0671	3	3	0.0235	1	1	0.0235	1	1
634	RAP1B_HUMAN	Ras-related protein Rap-1b OS=Homo sapiens GN=RAP1B PE=1 SV=1	21 kDa	0.136	3	3	0.0761	1	1	0.207	3	3	0.125	2	2	0.125	2	2	0.0652	1	1
635	SYFA_HUMAN	Phenylalanine--tRNA ligase alpha subunit OS=Homo sapiens GN=FARSA PE=1 SV=3	58 kDa	0.12	3	3	0.0925	2	2	0.0925	2	2	0.12	3	3	0.12	3	3	0.0925	2	2
636	BLVRB_HUMAN	Flavin reductase (NADPH) OS=Homo sapiens GN=BLVRB PE=1 SV=3	22 kDa	0.0437	1	1	0.0437	1	1	0.0437	1	1	0.301	4	4	0.301	4	4	0.184	3	3
637	NDUS3_HUMAN	NADH dehydrogenase [ubiquinone] iron-sulfur protein 3, mitochondrial OS=Homo sapiens GN=NDUFS3 PE=1 SV=1	30 kDa	0.17	3	3	0.106	2	2	0.106	2	2	0.22	4	4	0.22	4	4	0.22	4	4
638	RHG01_HUMAN	Rho GTPase-activating protein 1 OS=Homo sapiens GN=ARHGAP1 PE=1 SV=1	50 kDa	0.139	3	3	0.139	3	3	0.171	4	4	0.0979	2	2	0.0979	2	2	0.139	3	3
639	SF3B3_HUMAN	Splicing factor 3B subunit 3 OS=Homo sapiens GN=SF3B3 PE=1 SV=4	136 kDa	0.0337	3	3	0.0329	3	3	0.0362	3	3	0.0427	4	4	0.0329	3	3	0.0427	4	4
640	TFR1_HUMAN	Transferrin receptor protein 1 OS=Homo sapiens GN=TFRC PE=1 SV=2	85 kDa	0.103	5	5	0.0447	3	3	0.0934	5	5	0.05	3	3	0.0395	2	2	0.0171	1	1
641	THEM6_HUMAN	UPF0670 protein THEM6 OS=Homo sapiens GN=THEM6 PE=1 SV=2	24 kDa	0.202	2	2	0.202	2	2	0.202	2	2	0.202	2	2	0.202	2	2	0.0769	1	1
642.1	1A02_HUMAN	HLA class I histocompatibility antigen, A-2 alpha chain OS=Homo sapiens GN=HLA-A PE=1 SV=1	41 kDa	0.0822	2	1	0.0822	2	1	0.0822	2	1	0.0466	1	0	0	0	0	0.0466	1	0
642.2	1A31_HUMAN (+1)	HLA class I histocompatibility antigen, A-31 alpha chain OS=Homo sapiens GN=HLA-A PE=2 SV=2	41 kDa	0	0	0	0	0	0	0	0	0	0.0466	1	0	0	0	0	0	0	0
642.3	1A01_HUMAN (+1)	HLA class I histocompatibility antigen, A-1 alpha chain OS=Homo sapiens GN=HLA-A PE=1 SV=1	41 kDa	0	0	0	0	0	0	0	0	0	0.0466	1	0	0	0	0	0	0	0
642.4	1B27_HUMAN	HLA class I histocompatibility antigen, B-27 alpha chain OS=Homo sapiens GN=HLA-B PE=1 SV=2	40 kDa	0	0	0	0	0	0	0.047	1	0	0	0	0	0	0	0	0	0	0
643	1433F_HUMAN	14-3-3 protein eta OS=Homo sapiens GN=YWHAH PE=1 SV=4	28 kDa	0.134	3	1	0.203	5	3	0.203	5	3	0.24	5	3	0.191	4	2	0.134	3	1
644	ACSL4_HUMAN	Long-chain-fatty-acid--CoA ligase 4 OS=Homo sapiens GN=ACSL4 PE=1 SV=2	79 kDa	0.11	5	4	0.083	4	3	0.0985	4	3	0.0689	3	2	0.0506	2	1	0.0689	3	2
645	AN32B_HUMAN	Acidic leucine-rich nuclear phosphoprotein 32 family member B OS=Homo sapiens GN=ANP32B PE=1 SV=1	29 kDa	0.207	5	3	0.143	4	2	0.139	4	3	0.159	3	2	0.203	4	2	0.195	4	2
646	DDB1_HUMAN	DNA damage-binding protein 1 OS=Homo sapiens GN=DDB1 PE=1 SV=1	127 kDa	0.0561	4	4	0.0544	4	4	0.0579	4	4	0.0439	3	3	0.0316	2	2	0.0114	1	1
647	FINC_HUMAN	Fibronectin OS=Homo sapiens GN=FN1 PE=1 SV=4	263 kDa	0.0159	3	3	0.0214	3	3	0.0264	4	4	0.0184	3	3	0.0122	2	2	0.00587	1	1
648	FUMH_HUMAN	Fumarate hydratase, mitochondrial OS=Homo sapiens GN=FH PE=1 SV=3	55 kDa	0.114	3	3	0.104	3	3	0.247	5	5	0.235	6	6	0.151	4	4	0.0412	1	1
649	GPDA_HUMAN	Glycerol-3-phosphate dehydrogenase [NAD(+)], cytoplasmic OS=Homo sapiens GN=GPD1 PE=1 SV=4	38 kDa	0.0401	1	1	0.0401	1	1	0.198	5	5	0.103	2	2	0.155	4	4	0.169	4	4
650	MK01_HUMAN	Mitogen-activated protein kinase 1 OS=Homo sapiens GN=MAPK1 PE=1 SV=3	41 kDa	0.117	3	3	0.0972	2	2	0.161	4	4	0.0972	2	2	0.131	3	3	0.131	3	3
651	PDCD5_HUMAN	Programmed cell death protein 5 OS=Homo sapiens GN=PDCD5 PE=1 SV=3	14 kDa	0.288	4	4	0.2	3	3	0.376	5	5	0.2	3	3	0.192	2	2	0.192	2	2
652	PRS6B_HUMAN	26S protease regulatory subunit 6B OS=Homo sapiens GN=PSMC4 PE=1 SV=2	47 kDa	0.0909	3	3	0.0909	3	3	0.0574	2	2	0.0335	1	1	0.0646	2	2	0.0622	2	2
653	SAR1B_HUMAN	GTP-binding protein SAR1b OS=Homo sapiens GN=SAR1B PE=1 SV=1	22 kDa	0.167	4	4	0.111	2	2	0.167	3	3	0.0556	1	1	0.0556	1	1	0.0556	1	1
654	FKB1A_HUMAN	Peptidyl-prolyl cis-trans isomerase FKBP1A OS=Homo sapiens GN=FKBP1A PE=1 SV=2	12 kDa	0.287	2	2	0.287	4	4	0.287	2	2	0.12	1	1	0.12	1	1	0.12	1	1
655	HCDH_HUMAN	Hydroxyacyl-coenzyme A dehydrogenase, mitochondrial OS=Homo sapiens GN=HADH PE=1 SV=3	34 kDa	0.175	3	3	0.131	2	2	0.175	3	3	0.175	3	3	0.14	2	2	0.175	3	3
656	SYLC_HUMAN	Leucine--tRNA ligase, cytoplasmic OS=Homo sapiens GN=LARS PE=1 SV=2	134 kDa	0	0	0	0	0	0	0.0238	2	2	0.0689	5	5	0.0587	4	4	0.0706	5	5
657	UMPS_HUMAN	Uridine 5'-monophosphate synthase OS=Homo sapiens GN=UMPS PE=1 SV=1	52 kDa	0.188	4	4	0.188	4	4	0.21	5	5	0.0708	2	2	0.11	2	2	0.0708	2	2
658	RBBP7_HUMAN	Histone-binding protein RBBP7 OS=Homo sapiens GN=RBBP7 PE=1 SV=1	48 kDa	0.169	5	3	0.0871	3	2	0.122	3	2	0.132	3	3	0.0871	3	1	0.0588	2	1
659	LAT1_HUMAN	Large neutral amino acids transporter small subunit 1 OS=Homo sapiens GN=SLC7A5 PE=1 SV=2	55 kDa	0.0316	2	2	0.0316	2	2	0.0316	2	2	0.0631	2	2	0.0276	1	1	0.0276	1	1
660	ATPK_HUMAN	ATP synthase subunit f, mitochondrial OS=Homo sapiens GN=ATP5J2 PE=1 SV=3	11 kDa	0.117	1	1	0	0	0	0.138	1	1	0.117	1	1	0.255	2	2	0.255	2	2
661.1	ERF3A_HUMAN	Eukaryotic peptide chain release factor GTP-binding subunit ERF3A OS=Homo sapiens GN=GSPT1 PE=1 SV=1	56 kDa	0.18	6	2	0.124	4	2	0.158	5	2	0.022	1	0	0.022	1	0	0	0	0
661.2	ERF3B_HUMAN	Eukaryotic peptide chain release factor GTP-binding subunit ERF3B OS=Homo sapiens GN=GSPT2 PE=1 SV=2	69 kDa	0.086	4	0	0	0	0	0	0	0	0	0	0	0	0	0	0	0	0
662	ACOT2_HUMAN	Acyl-coenzyme A thioesterase 2, mitochondrial OS=Homo sapiens GN=ACOT2 PE=1 SV=6	53 kDa	0	0	0	0.0228	1	1	0.118	3	3	0.199	6	6	0.197	5	5	0.141	4	4
663	CAZA1_HUMAN	F-actin-capping protein subunit alpha-1 OS=Homo sapiens GN=CAPZA1 PE=1 SV=3	33 kDa	0.22	4	3	0.22	4	3	0.203	4	3	0.203	4	3	0.22	4	3	0.22	4	3
664	COPB2_HUMAN	Coatomer subunit beta' OS=Homo sapiens GN=COPB2 PE=1 SV=2	102 kDa	0.0541	3	3	0.074	4	4	0.0541	3	3	0.021	1	1	0.0342	2	2	0.0342	2	2
665	DAZP1_HUMAN	DAZ-associated protein 1 OS=Homo sapiens GN=DAZAP1 PE=1 SV=1	43 kDa	0.128	3	3	0.0909	2	2	0.0909	2	2	0.115	3	3	0.0909	2	2	0.0762	2	2
666	EIF3C_HUMAN	Eukaryotic translation initiation factor 3 subunit C OS=Homo sapiens GN=EIF3C PE=1 SV=1	105 kDa	0.0372	2	2	0.0482	3	3	0.0931	5	5	0.0482	2	2	0.0361	3	3	0.034	3	3
667	HMOX1_HUMAN	Heme oxygenase 1 OS=Homo sapiens GN=HMOX1 PE=1 SV=1	33 kDa	0.0833	1	1	0.125	2	2	0.125	2	2	0.226	4	4	0.184	3	3	0.181	3	3
668	HNRDL_HUMAN	Heterogeneous nuclear ribonucleoprotein D-like OS=Homo sapiens GN=HNRPDL PE=1 SV=3	46 kDa	0.112	5	4	0.081	4	3	0.081	3	2	0.081	4	2	0.0429	2	0	0.1	5	3
669	MGST1_HUMAN	Microsomal glutathione S-transferase 1 OS=Homo sapiens GN=MGST1 PE=1 SV=1	18 kDa	0.123	3	3	0.123	2	2	0.123	2	2	0.194	3	3	0.194	3	3	0.0903	2	2
670	MPRI_HUMAN	Cation-independent mannose-6-phosphate receptor OS=Homo sapiens GN=IGF2R PE=1 SV=3	274 kDa	0.0189	2	2	0.0189	2	2	0.0189	2	2	0.0245	3	3	0.0249	4	4	0.0397	5	5
671	MTAP_HUMAN	S-methyl-5'-thioadenosine phosphorylase OS=Homo sapiens GN=MTAP PE=1 SV=2	31 kDa	0.145	2	2	0.208	3	3	0.269	4	4	0.141	2	2	0.141	2	2	0.0813	1	1
672	NNTM_HUMAN	NAD(P) transhydrogenase, mitochondrial OS=Homo sapiens GN=NNT PE=1 SV=3	114 kDa	0.0239	2	2	0.0276	2	2	0.0525	3	3	0.0792	5	5	0.0525	3	3	0.0525	3	3
673	PGM1_HUMAN	Phosphoglucomutase-1 OS=Homo sapiens GN=PGM1 PE=1 SV=3	61 kDa	0.11	4	4	0.119	4	4	0.0979	3	3	0.0302	2	2	0.0302	2	2	0.0712	2	2
674	PPGB_HUMAN	Lysosomal protective protein OS=Homo sapiens GN=CTSA PE=1 SV=2	54 kDa	0.106	3	3	0.106	4	4	0.106	4	4	0.0229	1	1	0	0	0	0.0229	1	1
675	PSA2_HUMAN	Proteasome subunit alpha type-2 OS=Homo sapiens GN=PSMA2 PE=1 SV=2	26 kDa	0.141	2	2	0.231	3	3	0.141	2	2	0.141	2	2	0.141	2	2	0.141	2	2
676	FLOT1_HUMAN	Flotillin-1 OS=Homo sapiens GN=FLOT1 PE=1 SV=3	47 kDa	0.0773	2	2	0.0422	1	1	0.0422	1	1	0.0937	3	3	0.0679	2	2	0.0937	3	3
677	LEG1_HUMAN	Galectin-1 OS=Homo sapiens GN=LGALS1 PE=1 SV=2	15 kDa	0.259	3	3	0.259	3	3	0.259	3	3	0.259	3	3	0.259	3	3	0.17	2	2
678.1	AN32A_HUMAN	Acidic leucine-rich nuclear phosphoprotein 32 family member A OS=Homo sapiens GN=ANP32A PE=1 SV=1	29 kDa	0.185	4	2	0.185	4	2	0.225	4	3	0.181	4	3	0.225	5	3	0.173	4	2
678.2	AN32D_HUMAN	Acidic leucine-rich nuclear phosphoprotein 32 family member D OS=Homo sapiens GN=ANP32D PE=1 SV=2	15 kDa	0	0	0	0.0916	2	0	0	0	0	0	0	0	0	0	0	0	0	0
679	GRN_HUMAN	Granulins OS=Homo sapiens GN=GRN PE=1 SV=2	64 kDa	0.027	1	1	0.0843	2	2	0.027	1	1	0.0843	2	2	0.0573	1	1	0.027	1	1
680	AMPM1_HUMAN	Methionine aminopeptidase 1 OS=Homo sapiens GN=METAP1 PE=1 SV=2	43 kDa	0.0777	1	1	0.0777	1	1	0.111	2	2	0.0777	1	1	0.0777	1	1	0	0	0
681	CMC1_HUMAN	Calcium-binding mitochondrial carrier protein Aralar1 OS=Homo sapiens GN=SLC25A12 PE=1 SV=2	75 kDa	0.0428	1	0	0	0	0	0.0192	1	0	0.0192	1	0	0.0442	2	1	0.0192	1	0
682	ASGR2_HUMAN	Asialoglycoprotein receptor 2 OS=Homo sapiens GN=ASGR2 PE=1 SV=2	35 kDa	0.273	4	4	0.106	2	2	0.18	3	3	0.0707	1	1	0	0	0	0	0	0
683	AT1B1_HUMAN	Sodium/potassium-transporting ATPase subunit beta-1 OS=Homo sapiens GN=ATP1B1 PE=1 SV=1	35 kDa	0.261	4	4	0.224	3	3	0.125	3	3	0.172	3	3	0.172	3	3	0.208	4	4
684	BRX1_HUMAN	Ribosome biogenesis protein BRX1 homolog OS=Homo sapiens GN=BRIX1 PE=1 SV=2	41 kDa	0.195	3	3	0.156	2	2	0.195	3	3	0.102	2	2	0.0623	1	1	0.108	2	2
685	ECH1_HUMAN	Delta(3,5)-Delta(2,4)-dienoyl-CoA isomerase, mitochondrial OS=Homo sapiens GN=ECH1 PE=1 SV=2	36 kDa	0.0915	2	2	0.0488	1	1	0.0915	2	2	0.216	4	4	0.216	4	4	0.159	3	3
686	NP1L4_HUMAN	Nucleosome assembly protein 1-like 4 OS=Homo sapiens GN=NAP1L4 PE=1 SV=1	43 kDa	0.072	2	1	0.123	4	2	0.12	3	2	0.133	3	3	0.16	4	3	0.16	4	3
687	ODPB_HUMAN	Pyruvate dehydrogenase E1 component subunit beta, mitochondrial OS=Homo sapiens GN=PDHB PE=1 SV=3	39 kDa	0.0669	2	2	0.0752	2	2	0.0669	2	2	0.156	4	4	0.156	4	4	0.111	3	3
688	PSB5_HUMAN	Proteasome subunit beta type-5 OS=Homo sapiens GN=PSMB5 PE=1 SV=3	28 kDa	0.144	3	3	0.106	2	2	0.156	3	3	0.106	2	2	0.0989	2	2	0.243	4	4
689	RAB7A_HUMAN	Ras-related protein Rab-7a OS=Homo sapiens GN=RAB7A PE=1 SV=1	23 kDa	0.169	3	3	0.121	2	2	0.285	5	5	0.121	2	2	0.184	3	3	0.232	4	4
690	RBP2_HUMAN	E3 SUMO-protein ligase RanBP2 OS=Homo sapiens GN=RANBP2 PE=1 SV=2	358 kDa	0.00682	1	1	0.0161	3	3	0.0161	3	3	0.00372	1	1	0.00372	1	1	0.00372	1	1
691	RENT1_HUMAN	Regulator of nonsense transcripts 1 OS=Homo sapiens GN=UPF1 PE=1 SV=2	124 kDa	0.1	6	6	0.0558	4	4	0.0655	4	4	0.0221	1	1	0.0221	1	1	0.0221	1	1
692	SYK_HUMAN	Lysine--tRNA ligase OS=Homo sapiens GN=KARS PE=1 SV=3	68 kDa	0.111	4	4	0.0737	3	3	0.0737	3	3	0.0503	2	2	0.0871	3	3	0	0	0
693	ASPC1_HUMAN	Tether containing UBX domain for GLUT4 OS=Homo sapiens GN=ASPSCR1 PE=1 SV=1	60 kDa	0.0814	2	2	0.0814	2	2	0.0814	2	2	0.0687	2	2	0	0	0	0.0398	1	1
694	H2A2B_HUMAN	Histone H2A type 2-B OS=Homo sapiens GN=HIST2H2AB PE=1 SV=3	14 kDa	0.246	2	1	0.3	3	2	0.246	2	1	0.246	2	1	0.0692	1	0	0.0692	1	0
695	AP3D1_HUMAN	AP-3 complex subunit delta-1 OS=Homo sapiens GN=AP3D1 PE=1 SV=1	130 kDa	0.0295	2	2	0.0121	1	1	0.0121	1	1	0.0364	3	3	0.065	5	5	0.0538	4	4
696	CAN1_HUMAN	Calpain-1 catalytic subunit OS=Homo sapiens GN=CAPN1 PE=1 SV=1	82 kDa	0.0644	3	3	0.0952	4	4	0.0616	2	2	0.0952	4	4	0.0532	2	2	0.0168	1	1
697	CMC2_HUMAN	Calcium-binding mitochondrial carrier protein Aralar2 OS=Homo sapiens GN=SLC25A13 PE=1 SV=2	74 kDa	0.15	6	5	0.0993	4	3	0.0993	4	3	0.0904	4	3	0.0933	4	3	0.0741	3	2
698	ERF1_HUMAN	Eukaryotic peptide chain release factor subunit 1 OS=Homo sapiens GN=ETF1 PE=1 SV=3	49 kDa	0.114	4	4	0.0641	2	2	0.0915	3	3	0.0343	1	1	0.11	3	3	0.0618	2	2
699	FABP5_HUMAN	Fatty acid-binding protein, epidermal OS=Homo sapiens GN=FABP5 PE=1 SV=3	15 kDa	0.422	3	3	0.422	3	3	0.422	3	3	0.267	3	3	0.304	3	3	0.267	2	2
700	GLYC_HUMAN	Serine hydroxymethyltransferase, cytosolic OS=Homo sapiens GN=SHMT1 PE=1 SV=1	53 kDa	0.135	4	3	0.161	5	4	0.135	4	3	0.0952	3	2	0.0952	3	2	0.029	1	0
701	HMGA1_HUMAN	High mobility group protein HMG-I/HMG-Y OS=Homo sapiens GN=HMGA1 PE=1 SV=3	12 kDa	0.234	2	2	0.234	2	2	0.234	2	2	0.234	3	3	0.234	2	2	0.234	3	3
702	ITA2_HUMAN	Integrin alpha-2 OS=Homo sapiens GN=ITGA2 PE=1 SV=1	129 kDa	0.0288	2	2	0	0	0	0.011	1	1	0.0322	3	3	0	0	0	0	0	0
703	NDUS2_HUMAN	NADH dehydrogenase [ubiquinone] iron-sulfur protein 2, mitochondrial OS=Homo sapiens GN=NDUFS2 PE=1 SV=2	53 kDa	0.0691	2	2	0.095	3	3	0.117	3	3	0.0389	1	1	0	0	0	0.0389	1	1
704	NLTP_HUMAN	Non-specific lipid-transfer protein OS=Homo sapiens GN=SCP2 PE=1 SV=2	59 kDa	0.0951	5	5	0.0585	3	3	0.0585	3	3	0.0439	2	2	0.0439	3	3	0.0439	3	3
705	SQRD_HUMAN	Sulfide:quinone oxidoreductase, mitochondrial OS=Homo sapiens GN=SQRDL PE=1 SV=1	50 kDa	0.0467	1	1	0.0467	1	1	0.127	3	3	0.0467	1	1	0.0867	2	2	0.0867	2	2
706	TPR_HUMAN	Nucleoprotein TPR OS=Homo sapiens GN=TPR PE=1 SV=3	267 kDa	0.0135	2	2	0.0339	5	5	0.0212	3	3	0.00592	1	1	0.00592	1	1	0.00592	1	1
707	IF4B_HUMAN	Eukaryotic translation initiation factor 4B OS=Homo sapiens GN=EIF4B PE=1 SV=2	69 kDa	0.0262	1	1	0.0262	1	1	0.0262	1	1	0.072	3	3	0.0475	2	2	0.072	3	3
708	SEPT9_HUMAN	Septin-9 OS=Homo sapiens GN=SEPT9 PE=1 SV=2	65 kDa	0.041	2	2	0.058	3	3	0.0666	2	2	0.0666	3	3	0.0154	1	1	0.0307	1	1
709.1	VATB2_HUMAN	V-type proton ATPase subunit B, brain isoform OS=Homo sapiens GN=ATP6V1B2 PE=1 SV=3	57 kDa	0.112	3	2	0.139	4	2	0.0959	3	1	0.0822	2	1	0.0724	2	2	0.0724	2	2
709.2	VATB1_HUMAN	V-type proton ATPase subunit B, kidney isoform OS=Homo sapiens GN=ATP6V1B1 PE=1 SV=3	57 kDa	0	0	0	0.0663	2	0	0.0663	2	0	0.039	1	0	0	0	0	0	0	0
710	AOFB_HUMAN	Amine oxidase [flavin-containing] B OS=Homo sapiens GN=MAOB PE=1 SV=3	59 kDa	0.0904	3	3	0.0615	2	2	0.0615	2	2	0.0615	2	2	0.0827	3	3	0.0769	3	3
711	ECI1_HUMAN	Enoyl-CoA delta isomerase 1, mitochondrial OS=Homo sapiens GN=ECI1 PE=1 SV=1	33 kDa	0	0	0	0.043	1	1	0.0331	1	1	0.159	4	4	0.159	4	4	0.159	4	4
712	LG3BP_HUMAN	Galectin-3-binding protein OS=Homo sapiens GN=LGALS3BP PE=1 SV=1	65 kDa	0.111	4	4	0.0462	2	2	0.0752	3	3	0.0615	3	3	0.0462	2	2	0.0462	2	2
713	MA1A1_HUMAN	Mannosyl-oligosaccharide 1,2-alpha-mannosidase IA OS=Homo sapiens GN=MAN1A1 PE=1 SV=3	73 kDa	0.112	3	3	0.0306	1	1	0.133	4	4	0.0306	1	1	0.0306	1	1	0.0306	1	1
714	PEPD_HUMAN	Xaa-Pro dipeptidase OS=Homo sapiens GN=PEPD PE=1 SV=3	55 kDa	0.0832	3	3	0.103	4	4	0.126	5	5	0.0669	2	2	0.0325	1	1	0.0669	2	2
715	PH4H_HUMAN	Phenylalanine-4-hydroxylase OS=Homo sapiens GN=PAH PE=1 SV=1	52 kDa	0.159	4	4	0.181	4	4	0.237	6	6	0	0	0	0	0	0	0	0	0
716	RU17_HUMAN	U1 small nuclear ribonucleoprotein 70 kDa OS=Homo sapiens GN=SNRNP70 PE=1 SV=2	52 kDa	0.087	3	3	0.135	5	5	0.172	6	6	0.0549	2	2	0.0664	2	2	0.117	4	4
717	NDUV1_HUMAN	NADH dehydrogenase [ubiquinone] flavoprotein 1, mitochondrial OS=Homo sapiens GN=NDUFV1 PE=1 SV=4	51 kDa	0.106	3	3	0.0582	1	1	0.108	2	2	0.106	3	3	0.0194	1	1	0.0194	1	1
718	BCCIP_HUMAN	BRCA2 and CDKN1A-interacting protein OS=Homo sapiens GN=BCCIP PE=1 SV=1	36 kDa	0.124	2	2	0.124	2	2	0.124	2	2	0.124	2	2	0.124	2	2	0.124	2	2
719	CNBP_HUMAN	Cellular nucleic acid-binding protein OS=Homo sapiens GN=CNBP PE=1 SV=1	19 kDa	0.141	2	2	0.141	2	2	0.0734	1	1	0.153	2	2	0.153	2	2	0.153	2	2
720	HN1_HUMAN	Hematological and neurological expressed 1 protein OS=Homo sapiens GN=HN1 PE=1 SV=3	16 kDa	0.26	2	2	0.26	2	2	0.26	2	2	0.26	2	2	0.162	1	1	0.162	1	1
721	NTF2_HUMAN	Nuclear transport factor 2 OS=Homo sapiens GN=NUTF2 PE=1 SV=1	14 kDa	0.339	2	2	0.339	2	2	0.339	2	2	0.339	2	2	0.126	1	1	0.126	1	1
722	ATP5L_HUMAN	ATP synthase subunit g, mitochondrial OS=Homo sapiens GN=ATP5L PE=1 SV=3	11 kDa	0.379	3	3	0.272	2	2	0.272	2	2	0.379	3	3	0.272	2	2	0.379	3	3
723	GPC3_HUMAN	Glypican-3 OS=Homo sapiens GN=GPC3 PE=1 SV=1	66 kDa	0.103	4	4	0.0793	3	3	0.103	4	4	0	0	0	0	0	0	0	0	0
724	PSD12_HUMAN	26S proteasome non-ATPase regulatory subunit 12 OS=Homo sapiens GN=PSMD12 PE=1 SV=3	53 kDa	0.0461	1	1	0.0965	3	3	0.0461	1	1	0.0965	3	3	0.0746	2	2	0.0965	3	3
725	SPS2L_HUMAN	SPATS2-like protein OS=Homo sapiens GN=SPATS2L PE=1 SV=2	62 kDa	0.0591	2	2	0.124	4	4	0.124	4	4	0.0341	1	1	0.0645	2	2	0.052	2	2
726	SRP72_HUMAN	Signal recognition particle 72 kDa protein OS=Homo sapiens GN=SRP72 PE=1 SV=3	75 kDa	0.0507	2	2	0.0283	1	1	0.07	3	3	0.0999	4	4	0.0805	3	3	0.0805	3	3
727	PSME2_HUMAN	Proteasome activator complex subunit 2 OS=Homo sapiens GN=PSME2 PE=1 SV=4	27 kDa	0.13	2	2	0.0628	1	1	0.13	2	2	0.0669	1	1	0.23	3	3	0.13	2	2
728	THOP1_HUMAN	Thimet oligopeptidase OS=Homo sapiens GN=THOP1 PE=1 SV=2	79 kDa	0.0348	2	2	0.0566	3	3	0.0566	3	3	0.0435	2	2	0.0566	3	3	0.0218	1	1
729	CD59_HUMAN	CD59 glycoprotein OS=Homo sapiens GN=CD59 PE=1 SV=1	14 kDa	0.188	2	2	0.188	2	2	0.188	2	2	0.188	2	2	0.188	2	2	0.188	2	2
730	S100P_HUMAN	Protein S100-P OS=Homo sapiens GN=S100P PE=1 SV=2	10 kDa	0.105	1	1	0.105	1	1	0.242	2	2	0.242	2	2	0.242	2	2	0.242	2	2
731	APT_HUMAN	Adenine phosphoribosyltransferase OS=Homo sapiens GN=APRT PE=1 SV=2	20 kDa	0.189	3	3	0.156	2	2	0.189	3	3	0.244	4	4	0.144	2	2	0.2	3	3
732	LETM1_HUMAN	LETM1 and EF-hand domain-containing protein 1, mitochondrial OS=Homo sapiens GN=LETM1 PE=1 SV=1	83 kDa	0.0162	1	1	0.0447	2	2	0.0609	3	3	0.092	4	4	0.0812	4	4	0.0758	3	3
733	LMAN2_HUMAN	Vesicular integral-membrane protein VIP36 OS=Homo sapiens GN=LMAN2 PE=1 SV=1	40 kDa	0.129	3	3	0.0309	1	1	0.0674	2	2	0.146	4	4	0.0674	2	2	0.0927	3	3
734	MYO1C_HUMAN	Unconventional myosin-Ic OS=Homo sapiens GN=MYO1C PE=1 SV=4	122 kDa	0.0395	3	3	0.0452	3	3	0.031	2	2	0.0405	3	3	0.0216	2	2	0.0461	4	4
735	ODO2_HUMAN	Dihydrolipoyllysine-residue succinyltransferase component of 2-oxoglutarate dehydrogenase complex, mitochondrial OS=Homo sapiens GN=DLST PE=1 SV=4	49 kDa	0.0486	2	2	0.0486	2	2	0.0177	1	1	0.119	4	4	0.064	2	2	0.0883	3	3
736	PREP_HUMAN	Presequence protease, mitochondrial OS=Homo sapiens GN=PITRM1 PE=1 SV=2	117 kDa	0.0685	3	3	0.0338	2	2	0.0685	3	3	0.0598	3	3	0.0135	1	1	0.0444	3	3
737	COPE_HUMAN	Coatomer subunit epsilon OS=Homo sapiens GN=COPE PE=1 SV=3	34 kDa	0.104	2	2	0.146	3	3	0.0682	1	1	0.0682	2	2	0.104	3	3	0.104	3	3
738	HGD_HUMAN	Homogentisate 1,2-dioxygenase OS=Homo sapiens GN=HGD PE=1 SV=2	50 kDa	0.101	2	2	0.101	2	2	0.101	2	2	0.146	4	4	0.128	3	3	0.128	3	3
739	HP1B3_HUMAN	Heterochromatin protein 1-binding protein 3 OS=Homo sapiens GN=HP1BP3 PE=1 SV=1	61 kDa	0.0542	2	2	0.0814	3	3	0.0542	2	2	0.0542	2	2	0.0199	1	1	0.047	2	2
740	RS23_HUMAN	40S ribosomal protein S23 OS=Homo sapiens GN=RPS23 PE=1 SV=3	16 kDa	0.161	2	2	0.0769	1	1	0.161	2	2	0.161	2	2	0.161	2	2	0.161	2	2
741	ENOB_HUMAN	Beta-enolase OS=Homo sapiens GN=ENO3 PE=1 SV=4	47 kDa	0.194	5	2	0.187	4	1	0.187	4	1	0.127	3	0	0.127	3	0	0.187	4	1
742	COX6C_HUMAN	Cytochrome c oxidase subunit 6C OS=Homo sapiens GN=COX6C PE=1 SV=2	9 kDa	0.173	1	1	0.173	1	1	0.173	1	1	0.293	2	2	0.293	2	2	0.173	2	2
743	CF211_HUMAN	UPF0364 protein C6orf211 OS=Homo sapiens GN=C6orf211 PE=1 SV=1	51 kDa	0.0748	2	2	0.129	3	3	0.116	3	3	0.0385	1	1	0.0385	1	1	0.129	3	3
744	EIF3G_HUMAN	Eukaryotic translation initiation factor 3 subunit G OS=Homo sapiens GN=EIF3G PE=1 SV=2	36 kDa	0.05	1	1	0.147	2	2	0.237	3	3	0.147	2	2	0.228	4	4	0.188	3	3
745	ES1_HUMAN	ES1 protein homolog, mitochondrial OS=Homo sapiens GN=C21orf33 PE=1 SV=3	28 kDa	0.172	2	2	0.172	2	2	0.172	2	2	0.269	3	3	0.254	3	3	0.187	2	2
746	GLOD4_HUMAN	Glyoxalase domain-containing protein 4 OS=Homo sapiens GN=GLOD4 PE=1 SV=1	35 kDa	0.115	2	2	0.0415	1	1	0.147	3	3	0.185	4	4	0.105	3	3	0.0799	2	2
747	ISOC2_HUMAN	Isochorismatase domain-containing protein 2, mitochondrial OS=Homo sapiens GN=ISOC2 PE=1 SV=1	22 kDa	0.112	1	1	0.112	1	1	0.112	1	1	0.444	4	4	0.371	3	3	0.444	4	4
748	NMT1_HUMAN	Glycylpeptide N-tetradecanoyltransferase 1 OS=Homo sapiens GN=NMT1 PE=1 SV=2	57 kDa	0.0645	2	2	0.115	4	4	0.0645	2	2	0.0605	2	2	0.0605	2	2	0.0605	2	2
749	NSF_HUMAN	Vesicle-fusing ATPase OS=Homo sapiens GN=NSF PE=1 SV=3	83 kDa	0.0605	3	3	0.0269	1	1	0.0444	2	2	0.086	4	4	0.0618	3	3	0.047	2	2
750	NUCB2_HUMAN	Nucleobindin-2 OS=Homo sapiens GN=NUCB2 PE=1 SV=2	50 kDa	0.0738	2	2	0.0738	2	2	0.0429	1	1	0.114	3	3	0.126	4	4	0.145	4	4
751	S39AE_HUMAN	Zinc transporter ZIP14 OS=Homo sapiens GN=SLC39A14 PE=1 SV=3	54 kDa	0.0915	3	3	0.0915	3	3	0.0915	3	3	0.065	2	2	0.0407	1	1	0.0407	1	1
752	THTR_HUMAN	Thiosulfate sulfurtransferase OS=Homo sapiens GN=TST PE=1 SV=4	33 kDa	0.0808	1	1	0.0606	1	1	0.0808	1	1	0.246	4	4	0.205	3	3	0.145	2	2
753	TOM40_HUMAN	Mitochondrial import receptor subunit TOM40 homolog OS=Homo sapiens GN=TOMM40 PE=1 SV=1	38 kDa	0.0942	1	1	0.0388	1	1	0.163	3	3	0.163	3	3	0.163	3	3	0.163	3	3
754	VDAC3_HUMAN	Voltage-dependent anion-selective channel protein 3 OS=Homo sapiens GN=VDAC3 PE=1 SV=1	31 kDa	0.191	4	3	0.0813	2	1	0.0848	3	2	0.0848	3	2	0.0848	3	2	0.0848	3	2
755	MPPA_HUMAN	Mitochondrial-processing peptidase subunit alpha OS=Homo sapiens GN=PMPCA PE=1 SV=2	58 kDa	0.0933	3	3	0.0724	2	2	0.0724	2	2	0.0724	2	2	0.0724	2	2	0.0724	2	2
756	TRI25_HUMAN	E3 ubiquitin/ISG15 ligase TRIM25 OS=Homo sapiens GN=TRIM25 PE=1 SV=2	71 kDa	0.027	1	1	0.0492	2	2	0.0492	2	2	0.0508	2	2	0.073	3	3	0.073	3	3
757	P5CR2_HUMAN	Pyrroline-5-carboxylate reductase 2 OS=Homo sapiens GN=PYCR2 PE=1 SV=1	34 kDa	0.125	2	2	0.125	2	2	0.125	2	2	0.153	3	2	0.153	3	2	0.125	2	2
758	RL37A_HUMAN	60S ribosomal protein L37a OS=Homo sapiens GN=RPL37A PE=1 SV=2	10 kDa	0.141	2	2	0.13	1	1	0.13	1	1	0.13	1	1	0.217	2	2	0.217	2	2
759.1	PLST_HUMAN	Plastin-3 OS=Homo sapiens GN=PLS3 PE=1 SV=4	71 kDa	0.0397	2	0	0.0222	1	1	0.0762	4	1	0.0571	3	1	0.0429	2	1	0.0429	2	1
759.2	PLSL_HUMAN	Plastin-2 OS=Homo sapiens GN=LCP1 PE=1 SV=6	70 kDa	0.0207	1	0	0	0	0	0.0351	2	0	0.0351	2	0	0	0	0	0	0	0
759.3	PLSI_HUMAN	Plastin-1 OS=Homo sapiens GN=PLS1 PE=1 SV=2	70 kDa	0	0	0	0	0	0	0.0334	2	0	0	0	0	0	0	0	0	0	0
760	ACY1_HUMAN	Aminoacylase-1 OS=Homo sapiens GN=ACY1 PE=1 SV=1	46 kDa	0	0	0	0.0368	1	1	0.0882	2	2	0.115	3	3	0.0956	3	3	0.115	3	3
761	LSM2_HUMAN	U6 snRNA-associated Sm-like protein LSm2 OS=Homo sapiens GN=LSM2 PE=1 SV=1	11 kDa	0.6	3	3	0.6	3	3	0.6	3	3	0.4	2	2	0.4	2	2	0.2	1	1
762	EIF3H_HUMAN	Eukaryotic translation initiation factor 3 subunit H OS=Homo sapiens GN=EIF3H PE=1 SV=1	40 kDa	0.108	2	2	0.136	3	3	0.136	3	3	0.0284	1	1	0.0284	1	1	0	0	0
763	MRRP1_HUMAN	Mitochondrial ribonuclease P protein 1 OS=Homo sapiens GN=TRMT10C PE=1 SV=2	47 kDa	0	0	0	0.0447	1	1	0	0	0	0.062	2	2	0.0323	1	1	0.062	2	2
764	SRSF3_HUMAN	Serine/arginine-rich splicing factor 3 OS=Homo sapiens GN=SRSF3 PE=1 SV=1	19 kDa	0.128	1	1	0.128	1	1	0.128	1	1	0.183	2	2	0.183	2	2	0.183	2	2
765	PDXK_HUMAN	Pyridoxal kinase OS=Homo sapiens GN=PDXK PE=1 SV=1	35 kDa	0.103	2	2	0.103	2	2	0.103	2	2	0.122	2	2	0	0	0	0.103	2	2
766	PESC_HUMAN	Pescadillo homolog OS=Homo sapiens GN=PES1 PE=1 SV=1	68 kDa	0.0306	1	1	0.0476	2	2	0.0306	1	1	0.0476	2	2	0.0306	1	1	0.0476	2	2
767	FAAA_HUMAN	Fumarylacetoacetase OS=Homo sapiens GN=FAH PE=1 SV=2	46 kDa	0.0477	1	1	0.1	2	2	0.0955	2	2	0.0835	2	2	0.0525	1	1	0	0	0
768	FKBP3_HUMAN	Peptidyl-prolyl cis-trans isomerase FKBP3 OS=Homo sapiens GN=FKBP3 PE=1 SV=1	25 kDa	0.116	2	2	0.147	2	2	0.0491	1	1	0.125	2	2	0.058	1	1	0.058	1	1
769	DDX18_HUMAN	ATP-dependent RNA helicase DDX18 OS=Homo sapiens GN=DDX18 PE=1 SV=2	75 kDa	0.0209	1	1	0	0	0	0.0239	1	1	0.0955	4	4	0	0	0	0.0403	2	2
770	DNJC8_HUMAN	DnaJ homolog subfamily C member 8 OS=Homo sapiens GN=DNAJC8 PE=1 SV=2	30 kDa	0.245	3	3	0.245	3	3	0.289	4	4	0.13	2	2	0.0672	1	1	0.0672	1	1
771	GUAA_HUMAN	GMP synthase [glutamine-hydrolyzing] OS=Homo sapiens GN=GMPS PE=1 SV=1	77 kDa	0.0491	2	2	0.0649	3	3	0.0649	3	3	0.0289	1	1	0.0289	1	1	0.0289	1	1
772	ICAM1_HUMAN	Intercellular adhesion molecule 1 OS=Homo sapiens GN=ICAM1 PE=1 SV=2	58 kDa	0.0752	3	3	0.0752	3	3	0.0752	3	3	0.0451	2	2	0.0301	1	1	0.0752	3	3
773	KAP0_HUMAN	cAMP-dependent protein kinase type I-alpha regulatory subunit OS=Homo sapiens GN=PRKAR1A PE=1 SV=1	43 kDa	0.0525	2	2	0.0315	1	1	0.0472	1	1	0.0761	2	2	0.144	4	4	0.123	3	3
774	LAMP1_HUMAN	Lysosome-associated membrane glycoprotein 1 OS=Homo sapiens GN=LAMP1 PE=1 SV=3	45 kDa	0.0863	3	3	0.048	2	2	0.048	2	2	0.048	2	2	0.048	2	2	0.048	2	2
775	NACA_HUMAN	Nascent polypeptide-associated complex subunit alpha OS=Homo sapiens GN=NACA PE=1 SV=1	23 kDa	0.26	4	4	0.14	2	2	0.13	2	2	0.2	3	3	0.2	3	3	0.0605	1	1
776	PSPC1_HUMAN	Paraspeckle component 1 OS=Homo sapiens GN=PSPC1 PE=1 SV=1	59 kDa	0.0765	2	2	0.0669	2	2	0.0937	3	3	0.044	1	1	0.0765	3	3	0.044	1	1
777	BCLF1_HUMAN	Bcl-2-associated transcription factor 1 OS=Homo sapiens GN=BCLAF1 PE=1 SV=2	106 kDa	0.0283	2	2	0.0283	2	2	0.0283	2	2	0.0435	3	3	0.0435	3	3	0.025	2	2
778	CX6B1_HUMAN	Cytochrome c oxidase subunit 6B1 OS=Homo sapiens GN=COX6B1 PE=1 SV=2	10 kDa	0.128	1	1	0.128	1	1	0.128	1	1	0.128	1	1	0.128	1	1	0.442	2	2
779	RBM3_HUMAN	Putative RNA-binding protein 3 OS=Homo sapiens GN=RBM3 PE=1 SV=1	17 kDa	0.21	2	2	0.21	2	2	0.21	2	2	0.21	2	2	0.0955	1	1	0.21	2	2
780	RUXE_HUMAN	Small nuclear ribonucleoprotein E OS=Homo sapiens GN=SNRPE PE=1 SV=1	11 kDa	0.12	1	1	0.12	1	1	0.12	1	1	0.25	2	2	0.13	1	1	0.25	2	2
781	LRP1_HUMAN	Prolow-density lipoprotein receptor-related protein 1 OS=Homo sapiens GN=LRP1 PE=1 SV=2	505 kDa	0.00418	1	1	0.0088	2	2	0.0088	2	2	0.00286	1	1	0	0	0	0	0	0
782	ABCF1_HUMAN	ATP-binding cassette sub-family F member 1 OS=Homo sapiens GN=ABCF1 PE=1 SV=2	96 kDa	0.0533	2	2	0	0	0	0.0533	2	2	0	0	0	0	0	0	0	0	0
783	ACS2L_HUMAN	Acetyl-coenzyme A synthetase 2-like, mitochondrial OS=Homo sapiens GN=ACSS1 PE=1 SV=2	75 kDa	0.0987	3	3	0.0566	2	2	0.0987	3	3	0.0421	1	1	0.0697	2	2	0.0711	2	2
784	CPVL_HUMAN	Probable serine carboxypeptidase CPVL OS=Homo sapiens GN=CPVL PE=1 SV=2	54 kDa	0.0399	1	1	0.0273	1	1	0.0336	1	1	0.084	3	3	0.0672	2	2	0.0672	2	2
785	FPPS_HUMAN	Farnesyl pyrophosphate synthase OS=Homo sapiens GN=FDPS PE=1 SV=4	48 kDa	0.0286	1	1	0.0716	2	2	0.0716	2	2	0.0716	2	2	0.0716	2	2	0.122	4	4
786	RBM39_HUMAN	RNA-binding protein 39 OS=Homo sapiens GN=RBM39 PE=1 SV=2	59 kDa	0.138	4	4	0.0604	2	2	0.138	4	4	0.0811	3	3	0	0	0	0.0491	2	2
787	RM12_HUMAN	39S ribosomal protein L12, mitochondrial OS=Homo sapiens GN=MRPL12 PE=1 SV=2	21 kDa	0.288	4	4	0.232	2	2	0.0606	1	1	0.288	3	3	0.232	2	2	0.232	2	2
788	TOM22_HUMAN	Mitochondrial import receptor subunit TOM22 homolog OS=Homo sapiens GN=TOMM22 PE=1 SV=3	16 kDa	0.261	2	2	0.176	1	1	0	0	0	0.254	2	2	0.338	3	3	0.254	2	2
789	MRT4_HUMAN	mRNA turnover protein 4 homolog OS=Homo sapiens GN=MRTO4 PE=1 SV=2	28 kDa	0.0628	1	1	0.105	2	2	0.0628	1	1	0.0418	1	1	0.0628	1	1	0.163	2	2
790	FACE1_HUMAN	CAAX prenyl protease 1 homolog OS=Homo sapiens GN=ZMPSTE24 PE=1 SV=2	55 kDa	0.0337	1	1	0	0	0	0.0337	1	1	0.0611	2	2	0	0	0	0.0337	1	1
791.1	SAFB1_HUMAN	Scaffold attachment factor B1 OS=Homo sapiens GN=SAFB PE=1 SV=4	103 kDa	0.0208	2	0	0.0208	2	0	0.0208	2	0	0.0503	3	0	0.0503	3	0	0.0109	1	0
791.2	SAFB2_HUMAN	Scaffold attachment factor B2 OS=Homo sapiens GN=SAFB2 PE=1 SV=1	107 kDa	0.0199	2	0	0.0199	2	0	0.0199	2	0	0.0483	3	0	0.0483	3	0	0.0105	1	0
792.1	GBB1_HUMAN	Guanine nucleotide-binding protein G(I)/G(S)/G(T) subunit beta-1 OS=Homo sapiens GN=GNB1 PE=1 SV=3	37 kDa	0.0912	2	1	0.0912	2	1	0.0588	1	1	0.0588	1	1	0.162	4	3	0.0971	2	2
792.2	GBB2_HUMAN	Guanine nucleotide-binding protein G(I)/G(S)/G(T) subunit beta-2 OS=Homo sapiens GN=GNB2 PE=1 SV=3	37 kDa	0.0324	1	0	0.0324	1	0	0	0	0	0	0	0	0.0294	1	0	0.0382	1	1
793.1	GNAI2_HUMAN	Guanine nucleotide-binding protein G(i) subunit alpha-2 OS=Homo sapiens GN=GNAI2 PE=1 SV=3	40 kDa	0.118	2	1	0.149	3	1	0.149	3	1	0.031	1	0	0.031	1	0	0	0	0
793.2	GNAI3_HUMAN	Guanine nucleotide-binding protein G(k) subunit alpha OS=Homo sapiens GN=GNAI3 PE=1 SV=3	41 kDa	0.0819	2	1	0.113	3	1	0.113	3	1	0	0	0	0	0	0	0	0	0
793.3	GNAS1_HUMAN (+1)	Guanine nucleotide-binding protein G(s) subunit alpha isoforms XLas OS=Homo sapiens GN=GNAS PE=1 SV=2	111 kDa	0	0	0	0	0	0	0	0	0	0	0	0	0	0	0	0.00868	1	1
793.4	GNAO_HUMAN	Guanine nucleotide-binding protein G(o) subunit alpha OS=Homo sapiens GN=GNAO1 PE=1 SV=4	40 kDa	0	0	0	0	0	0	0	0	0	0	0	0	0	0	0	0	0	0
794	MYH14_HUMAN	Myosin-14 OS=Homo sapiens GN=MYH14 PE=1 SV=2	228 kDa	0.013	2	0	0.013	2	0	0.0216	3	1	0	0	0	0	0	0	0	0	0
795	1433G_HUMAN	14-3-3 protein gamma OS=Homo sapiens GN=YWHAG PE=1 SV=2	28 kDa	0.166	4	1	0.166	4	1	0.166	4	1	0.32	7	4	0.283	6	3	0.243	5	2
796	CNN3_HUMAN	Calponin-3 OS=Homo sapiens GN=CNN3 PE=1 SV=1	36 kDa	0.167	5	4	0.128	4	3	0.0912	2	2	0	0	0	0.134	3	3	0.0608	1	1
797	CPPED_HUMAN	Calcineurin-like phosphoesterase domain-containing protein 1 OS=Homo sapiens GN=CPPED1 PE=1 SV=3	36 kDa	0.0828	2	2	0.121	2	2	0.035	1	1	0.121	2	2	0.156	3	3	0.121	2	2
798	ECM29_HUMAN	Proteasome-associated protein ECM29 homolog OS=Homo sapiens GN=ECM29 PE=1 SV=2	204 kDa	0.00705	1	1	0.00705	1	1	0.0222	2	2	0.0206	2	2	0.0341	4	4	0.0125	2	2
799	H15_HUMAN	Histone H1.5 OS=Homo sapiens GN=HIST1H1B PE=1 SV=3	23 kDa	0.106	3	3	0.146	4	3	0.0531	1	1	0.106	3	3	0.106	2	2	0.0575	1	1
800	IF2P_HUMAN	Eukaryotic translation initiation factor 5B OS=Homo sapiens GN=EIF5B PE=1 SV=4	139 kDa	0.0648	4	4	0.0172	1	1	0.0877	4	4	0.0426	2	2	0.0164	2	2	0.0221	2	2
801	IF4H_HUMAN	Eukaryotic translation initiation factor 4H OS=Homo sapiens GN=EIF4H PE=1 SV=5	27 kDa	0.202	3	3	0.202	3	3	0.202	3	3	0.145	2	2	0.0524	1	1	0.0927	1	1
802	ITAV_HUMAN	Integrin alpha-V OS=Homo sapiens GN=ITGAV PE=1 SV=2	116 kDa	0.0582	4	4	0.0401	3	3	0.0582	4	4	0.0534	3	3	0	0	0	0.0162	1	1
803	MAOM_HUMAN	NAD-dependent malic enzyme, mitochondrial OS=Homo sapiens GN=ME2 PE=1 SV=1	65 kDa	0.0993	2	2	0.0993	2	2	0.0993	2	2	0.0582	2	2	0.0582	2	2	0.127	3	3
804	NSUN2_HUMAN	tRNA (cytosine(34)-C(5))-methyltransferase OS=Homo sapiens GN=NSUN2 PE=1 SV=2	86 kDa	0.0535	2	2	0	0	0	0	0	0	0.0821	4	4	0.0522	3	3	0.0874	4	4
805	PCYOX_HUMAN	Prenylcysteine oxidase 1 OS=Homo sapiens GN=PCYOX1 PE=1 SV=3	57 kDa	0.0554	3	3	0.0376	2	2	0.0158	1	1	0.0594	3	3	0.0851	4	4	0.0416	2	2
806	SEP11_HUMAN	Septin-11 OS=Homo sapiens GN=SEPT11 PE=1 SV=3	49 kDa	0.0956	4	3	0.11	4	3	0.0466	2	1	0.0466	2	1	0.0466	2	1	0.0466	2	1
807	SNUT2_HUMAN	U4/U6.U5 tri-snRNP-associated protein 2 OS=Homo sapiens GN=USP39 PE=1 SV=2	65 kDa	0.101	3	3	0.0726	2	2	0.0602	2	2	0.0389	1	1	0.0389	1	1	0.0389	1	1
808	PSB4_HUMAN	Proteasome subunit beta type-4 OS=Homo sapiens GN=PSMB4 PE=1 SV=4	29 kDa	0.114	2	2	0.114	2	2	0.114	2	2	0.152	3	3	0.117	2	2	0.121	2	2
809	ATP5I_HUMAN	ATP synthase subunit e, mitochondrial OS=Homo sapiens GN=ATP5I PE=1 SV=2	8 kDa	0.304	2	2	0.145	1	1	0.145	1	1	0.304	2	2	0.304	2	2	0.145	1	1
810	RT36_HUMAN	28S ribosomal protein S36, mitochondrial OS=Homo sapiens GN=MRPS36 PE=1 SV=2	11 kDa	0.282	2	2	0.282	2	2	0.282	2	2	0.282	2	2	0.282	2	2	0.282	2	2
811	IPYR2_HUMAN	Inorganic pyrophosphatase 2, mitochondrial OS=Homo sapiens GN=PPA2 PE=1 SV=2	38 kDa	0.141	2	2	0.0778	1	1	0.0778	1	1	0.141	2	2	0.141	2	2	0.141	2	2
812.1	COR1C_HUMAN	Coronin-1C OS=Homo sapiens GN=CORO1C PE=1 SV=1	53 kDa	0.0443	2	2	0.124	4	4	0.0232	1	1	0	0	0	0.105	3	2	0.0422	1	1
812.2	CORO6_HUMAN	Coronin-6 OS=Homo sapiens GN=CORO6 PE=1 SV=2	53 kDa	0	0	0	0	0	0	0	0	0	0	0	0	0	0	0	0	0	0
813	FKB11_HUMAN	Peptidyl-prolyl cis-trans isomerase FKBP11 OS=Homo sapiens GN=FKBP11 PE=1 SV=1	22 kDa	0.144	2	2	0.0547	1	1	0.0896	1	1	0.234	4	4	0.179	3	3	0.234	3	3
814	SPB6_HUMAN	Serpin B6 OS=Homo sapiens GN=SERPINB6 PE=1 SV=3	43 kDa	0.0532	1	1	0.0931	2	2	0.0931	2	2	0.117	3	3	0.117	3	3	0.157	4	4
815	STAU1_HUMAN	Double-stranded RNA-binding protein Staufen homolog 1 OS=Homo sapiens GN=STAU1 PE=1 SV=2	63 kDa	0.0572	1	1	0.159	4	4	0.187	5	5	0	0	0	0	0	0	0	0	0
816	SUN2_HUMAN	SUN domain-containing protein 2 OS=Homo sapiens GN=SUN2 PE=1 SV=3	80 kDa	0.105	4	4	0.0669	3	3	0.105	4	4	0	0	0	0	0	0	0	0	0
817	PSB2_HUMAN	Proteasome subunit beta type-2 OS=Homo sapiens GN=PSMB2 PE=1 SV=1	23 kDa	0.129	3	3	0.159	2	2	0.129	3	3	0.0498	1	1	0	0	0	0.0547	1	1
818	STMN1_HUMAN	Stathmin OS=Homo sapiens GN=STMN1 PE=1 SV=3	17 kDa	0.242	3	3	0.181	2	2	0.242	3	3	0.0604	1	1	0.0604	1	1	0.0604	1	1
819	SRP09_HUMAN	Signal recognition particle 9 kDa protein OS=Homo sapiens GN=SRP9 PE=1 SV=2	10 kDa	0.221	2	2	0.221	2	2	0.221	2	2	0.128	1	1	0.128	1	1	0.349	3	3
820	BUB3_HUMAN	Mitotic checkpoint protein BUB3 OS=Homo sapiens GN=BUB3 PE=1 SV=1	37 kDa	0.125	2	2	0.146	2	2	0.0854	1	1	0	0	0	0.061	1	1	0.0854	1	1
821	PTRD1_HUMAN	Putative peptidyl-tRNA hydrolase PTRHD1 OS=Homo sapiens GN=PTRHD1 PE=1 SV=1	16 kDa	0.279	2	2	0.1	1	1	0.279	2	2	0.279	2	2	0.1	1	1	0.1	1	1
822	DJB11_HUMAN	DnaJ homolog subfamily B member 11 OS=Homo sapiens GN=DNAJB11 PE=1 SV=1	41 kDa	0.0475	1	1	0.0531	1	1	0.0475	1	1	0.101	2	2	0.0475	1	1	0.0475	1	1
823.1	UCRI_HUMAN	Cytochrome b-c1 complex subunit Rieske, mitochondrial OS=Homo sapiens GN=UQCRFS1 PE=1 SV=2	30 kDa	0.0803	1	1	0.0803	1	1	0.0803	1	1	0.208	3	1	0.113	2	1	0.208	3	1
823.2	UCRIL_HUMAN	Putative cytochrome b-c1 complex subunit Rieske-like protein 1 OS=Homo sapiens GN=UQCRFS1P1 PE=5 SV=1	31 kDa	0	0	0	0	0	0	0	0	0	0.124	2	0	0.0318	1	0	0.124	2	0
824	ANX11_HUMAN	Annexin A11 OS=Homo sapiens GN=ANXA11 PE=1 SV=1	54 kDa	0.0713	2	2	0.0713	2	2	0.0713	2	2	0.0812	3	3	0	0	0	0	0	0
825	CAB45_HUMAN	45 kDa calcium-binding protein OS=Homo sapiens GN=SDF4 PE=1 SV=1	42 kDa	0.16	3	3	0.16	3	3	0.141	3	3	0.116	2	2	0.058	1	1	0	0	0
826	KTN1_HUMAN	Kinectin OS=Homo sapiens GN=KTN1 PE=1 SV=1	156 kDa	0.031	3	3	0.0214	2	2	0.0147	1	1	0	0	0	0.00884	1	1	0.0118	1	1
827	NAMPT_HUMAN	Nicotinamide phosphoribosyltransferase OS=Homo sapiens GN=NAMPT PE=1 SV=1	56 kDa	0.0591	1	1	0.0407	1	1	0.124	3	3	0.0428	1	1	0.0835	2	2	0.0835	2	2
828	RS21_HUMAN	40S ribosomal protein S21 OS=Homo sapiens GN=RPS21 PE=1 SV=1	9 kDa	0.458	4	4	0.229	2	2	0.229	2	2	0.12	1	1	0.12	1	1	0.133	2	2
829	SC22B_HUMAN	Vesicle-trafficking protein SEC22b OS=Homo sapiens GN=SEC22B PE=1 SV=4	25 kDa	0.112	2	2	0.112	2	2	0.167	3	3	0.112	2	2	0.112	2	2	0.112	2	2
830	SC24C_HUMAN	Protein transport protein Sec24C OS=Homo sapiens GN=SEC24C PE=1 SV=3	118 kDa	0.0567	4	4	0.0302	2	2	0.0567	4	4	0.0146	1	1	0.0192	1	1	0	0	0
831	SPEE_HUMAN	Spermidine synthase OS=Homo sapiens GN=SRM PE=1 SV=1	34 kDa	0.195	3	3	0.0728	1	1	0.116	2	2	0.152	2	2	0.043	1	1	0.116	2	2
832	SRP68_HUMAN	Signal recognition particle 68 kDa protein OS=Homo sapiens GN=SRP68 PE=1 SV=2	71 kDa	0.104	5	5	0	0	0	0.0766	3	3	0.0415	2	2	0.0447	2	2	0.0447	2	2
833	ANXA7_HUMAN	Annexin A7 OS=Homo sapiens GN=ANXA7 PE=1 SV=3	53 kDa	0.0738	2	2	0.107	3	3	0.0738	2	2	0.107	3	3	0.0738	2	2	0.0184	1	1
834	DNJB1_HUMAN	DnaJ homolog subfamily B member 1 OS=Homo sapiens GN=DNAJB1 PE=1 SV=4	38 kDa	0.118	3	3	0.0735	2	2	0.0735	2	2	0.0735	2	2	0.0735	2	2	0.0618	2	1
835	ODPA_HUMAN	Pyruvate dehydrogenase E1 component subunit alpha, somatic form, mitochondrial OS=Homo sapiens GN=PDHA1 PE=1 SV=3	43 kDa	0.0538	2	2	0.0615	2	2	0.0359	1	1	0.0821	3	3	0.0821	3	3	0.059	2	2
836	S10AB_HUMAN	Protein S100-A11 OS=Homo sapiens GN=S100A11 PE=1 SV=2	12 kDa	0.19	2	2	0	0	0	0.0857	1	1	0	0	0	0.19	2	2	0.343	3	3
837	SEC63_HUMAN	Translocation protein SEC63 homolog OS=Homo sapiens GN=SEC63 PE=1 SV=2	88 kDa	0.0197	1	1	0.0316	2	2	0.0434	3	3	0.0197	1	1	0.0197	1	1	0.0197	1	1
838	PPM1G_HUMAN	Protein phosphatase 1G OS=Homo sapiens GN=PPM1G PE=1 SV=1	59 kDa	0.0623	2	2	0.0623	2	2	0.0623	2	2	0.0623	2	2	0.0952	3	3	0.0623	2	2
839	GSH0_HUMAN	Glutamate--cysteine ligase regulatory subunit OS=Homo sapiens GN=GCLM PE=1 SV=1	31 kDa	0	0	0	0.0584	1	1	0.109	2	2	0.109	2	2	0.109	2	2	0.109	2	2
840	ATD3A_HUMAN	ATPase family AAA domain-containing protein 3A OS=Homo sapiens GN=ATAD3A PE=1 SV=2	71 kDa	0.0457	2	1	0.0726	3	2	0.0726	3	2	0.0694	3	2	0.0615	3	2	0.0615	3	2
841	NDUA9_HUMAN	NADH dehydrogenase [ubiquinone] 1 alpha subcomplex subunit 9, mitochondrial OS=Homo sapiens GN=NDUFA9 PE=1 SV=2	43 kDa	0.0875	2	2	0.0531	1	1	0.0345	1	1	0.0531	1	1	0.0981	2	2	0.0531	1	1
842	TMED9_HUMAN	Transmembrane emp24 domain-containing protein 9 OS=Homo sapiens GN=TMED9 PE=1 SV=2	27 kDa	0.0851	2	2	0.0851	2	2	0.0851	2	2	0.0851	2	2	0.0851	2	2	0.0851	2	2
843	ITIH2_HUMAN	Inter-alpha-trypsin inhibitor heavy chain H2 OS=Homo sapiens GN=ITIH2 PE=1 SV=2	106 kDa	0.0349	2	2	0.0349	2	2	0.0211	1	1	0.0211	1	1	0.0211	1	1	0.0211	1	1
844	TRA2B_HUMAN	Transformer-2 protein homolog beta OS=Homo sapiens GN=TRA2B PE=1 SV=1	34 kDa	0.104	2	2	0.0347	1	1	0.0347	1	1	0.0347	1	1	0.0347	1	1	0.0347	1	1
845	NNRE_HUMAN	NAD(P)H-hydrate epimerase OS=Homo sapiens GN=APOA1BP PE=1 SV=2	32 kDa	0.104	2	2	0.066	1	1	0.066	1	1	0.066	1	1	0.104	2	2	0.104	2	2
846	DIP2B_HUMAN	Disco-interacting protein 2 homolog B OS=Homo sapiens GN=DIP2B PE=1 SV=3	171 kDa	0.00761	1	1	0	0	0	0.00761	1	1	0.0178	2	2	0.0178	2	2	0.0178	2	2
847.1	TAGL2_HUMAN	Transgelin-2 OS=Homo sapiens GN=TAGLN2 PE=1 SV=3	22 kDa	0.271	4	3	0.241	3	3	0.171	2	2	0.171	2	2	0.0905	1	1	0.0905	1	1
847.2	TAGL3_HUMAN	Transgelin-3 OS=Homo sapiens GN=TAGLN3 PE=1 SV=2	22 kDa	0	0	0	0	0	0	0	0	0	0	0	0	0	0	0	0	0	0
848.1	MAK_HUMAN	Serine/threonine-protein kinase MAK OS=Homo sapiens GN=MAK PE=1 SV=2	71 kDa	0	0	0	0.0128	1	0	0	0	0	0	0	0	0	0	0	0.0128	1	0
848.2	ICK_HUMAN	Serine/threonine-protein kinase ICK OS=Homo sapiens GN=ICK PE=1 SV=1	71 kDa	0.0127	1	0	0.0127	1	0	0.0127	1	0	0	0	0	0	0	0	0	0	0
848.3	SRC_HUMAN	Proto-oncogene tyrosine-protein kinase Src OS=Homo sapiens GN=SRC PE=1 SV=3	60 kDa	0.0149	1	0	0.0149	1	0	0	0	0	0.0149	1	0	0	0	0	0.0149	1	0
848.4	FGR_HUMAN	Tyrosine-protein kinase Fgr OS=Homo sapiens GN=FGR PE=1 SV=2	59 kDa	0.0151	1	0	0	0	0	0.0151	1	0	0	0	0	0	0	0	0	0	0
848.5	FYN_HUMAN	Tyrosine-protein kinase Fyn OS=Homo sapiens GN=FYN PE=1 SV=3	61 kDa	0.0298	2	0	0.0298	2	0	0	0	0	0.0149	1	0	0	0	0	0.0298	2	0
848.6	FGFR3_HUMAN	Fibroblast growth factor receptor 3 OS=Homo sapiens GN=FGFR3 PE=1 SV=1	88 kDa	0	0	0	0	0	0	0	0	0	0	0	0	0	0	0	0	0	0
848.7	HCK_HUMAN	Tyrosine-protein kinase HCK OS=Homo sapiens GN=HCK PE=1 SV=5	60 kDa	0	0	0	0	0	0	0	0	0	0	0	0	0	0	0	0	0	0
848.8	BLK_HUMAN	Tyrosine-protein kinase Blk OS=Homo sapiens GN=BLK PE=1 SV=3	58 kDa	0	0	0	0	0	0	0	0	0	0	0	0	0	0	0	0	0	0
848.9	LCK_HUMAN	Tyrosine-protein kinase Lck OS=Homo sapiens GN=LCK PE=1 SV=6	58 kDa	0	0	0	0	0	0	0	0	0	0	0	0	0	0	0	0	0	0
849.1	MT2_HUMAN	Metallothionein-2 OS=Homo sapiens GN=MT2A PE=1 SV=1	6 kDa	0.525	2	1	0.525	2	1	0.525	2	1	0	0	0	0	0	0	0	0	0
849.2	MT1E_HUMAN	Metallothionein-1E OS=Homo sapiens GN=MT1E PE=1 SV=1	6 kDa	0.525	2	1	0.525	2	1	0.525	2	1	0	0	0	0	0	0	0	0	0
850	ATP5J_HUMAN	ATP synthase-coupling factor 6, mitochondrial OS=Homo sapiens GN=ATP5J PE=1 SV=1	13 kDa	0.481	3	3	0.343	2	2	0.343	2	2	0.306	2	2	0.13	1	1	0.13	1	1
851	CBX3_HUMAN	Chromobox protein homolog 3 OS=Homo sapiens GN=CBX3 PE=1 SV=4	21 kDa	0.213	3	3	0.148	2	2	0.306	3	3	0.158	1	1	0	0	0	0.158	1	1
852	RCC2_HUMAN	Protein RCC2 OS=Homo sapiens GN=RCC2 PE=1 SV=2	56 kDa	0.0287	1	1	0.0824	3	3	0.0211	1	1	0.107	4	4	0.0536	2	2	0	0	0
853	SAE2_HUMAN	SUMO-activating enzyme subunit 2 OS=Homo sapiens GN=UBA2 PE=1 SV=2	71 kDa	0.0234	1	1	0.0234	1	1	0.0969	3	3	0.0469	3	3	0.0234	1	1	0.025	2	2
854	SEC13_HUMAN	Protein SEC13 homolog OS=Homo sapiens GN=SEC13 PE=1 SV=3	36 kDa	0.217	3	3	0.106	2	2	0.301	4	4	0.106	2	2	0.0342	1	1	0.106	2	2
855	SF3A3_HUMAN	Splicing factor 3A subunit 3 OS=Homo sapiens GN=SF3A3 PE=1 SV=1	59 kDa	0.118	4	4	0.0439	2	2	0.0938	3	3	0.024	1	1	0	0	0	0.0439	2	2
856	SUCB2_HUMAN	Succinyl-CoA ligase [GDP-forming] subunit beta, mitochondrial OS=Homo sapiens GN=SUCLG2 PE=1 SV=2	47 kDa	0.0278	1	1	0.0278	1	1	0	0	0	0.111	4	4	0.104	2	2	0.157	6	6
857	CPNE1_HUMAN	Copine-1 OS=Homo sapiens GN=CPNE1 PE=1 SV=1	59 kDa	0.067	2	2	0.067	2	2	0.067	2	2	0.0466	2	2	0.0466	2	2	0.067	3	3
858	RAB21_HUMAN	Ras-related protein Rab-21 OS=Homo sapiens GN=RAB21 PE=1 SV=3	24 kDa	0.173	3	3	0.12	2	2	0.173	3	3	0.12	2	2	0	0	0	0.0444	1	1
859	TIM13_HUMAN	Mitochondrial import inner membrane translocase subunit Tim13 OS=Homo sapiens GN=TIMM13 PE=1 SV=1	11 kDa	0.263	2	2	0.263	2	2	0.263	2	2	0.147	1	1	0.147	1	1	0.421	3	3
860	IPO4_HUMAN	Importin-4 OS=Homo sapiens GN=IPO4 PE=1 SV=2	119 kDa	0.0296	2	2	0.0194	1	1	0.0379	3	3	0.0194	1	1	0.0194	1	1	0.0194	1	1
861	SAE1_HUMAN	SUMO-activating enzyme subunit 1 OS=Homo sapiens GN=SAE1 PE=1 SV=1	38 kDa	0.0578	1	1	0.0578	1	1	0.153	3	3	0.121	2	2	0.0578	1	1	0.121	2	2
862	SF3A1_HUMAN	Splicing factor 3A subunit 1 OS=Homo sapiens GN=SF3A1 PE=1 SV=1	89 kDa	0.0391	2	2	0.0593	3	3	0.0391	2	2	0.0492	2	2	0.0353	2	2	0.0189	1	1
863	GLRX1_HUMAN	Glutaredoxin-1 OS=Homo sapiens GN=GLRX PE=1 SV=2	12 kDa	0.104	1	1	0.113	2	2	0.113	2	2	0.113	2	2	0.113	2	2	0.104	1	1
864	RT22_HUMAN	28S ribosomal protein S22, mitochondrial OS=Homo sapiens GN=MRPS22 PE=1 SV=1	41 kDa	0.117	2	2	0	0	0	0.075	1	1	0.075	1	1	0.075	1	1	0.131	2	2
865	NOG1_HUMAN	Nucleolar GTP-binding protein 1 OS=Homo sapiens GN=GTPBP4 PE=1 SV=3	74 kDa	0.0189	1	1	0.0347	2	2	0.0457	2	2	0.0505	2	2	0.0505	2	2	0.0505	2	2
866	MTND_HUMAN	1,2-dihydroxy-3-keto-5-methylthiopentene dioxygenase OS=Homo sapiens GN=ADI1 PE=1 SV=1	21 kDa	0.19	2	2	0.19	2	2	0.19	2	2	0	0	0	0.0726	1	1	0	0	0
867	AN32E_HUMAN	Acidic leucine-rich nuclear phosphoprotein 32 family member E OS=Homo sapiens GN=ANP32E PE=1 SV=1	31 kDa	0.112	2	2	0.0522	1	1	0.0522	2	2	0.0522	2	2	0.0522	1	1	0.0522	2	2
868	PAK2_HUMAN	Serine/threonine-protein kinase PAK 2 OS=Homo sapiens GN=PAK2 PE=1 SV=3	58 kDa	0.0534	2	2	0.0897	2	2	0.063	2	2	0.0534	2	2	0	0	0	0.0324	1	1
869	PP2AA_HUMAN (+1)	Serine/threonine-protein phosphatase 2A catalytic subunit alpha isoform OS=Homo sapiens GN=PPP2CA PE=1 SV=1	36 kDa	0.0485	1	1	0.0485	1	1	0.117	2	2	0.0485	1	1	0	0	0	0.117	2	2
870	BAG6_HUMAN	Large proline-rich protein BAG6 OS=Homo sapiens GN=BAG6 PE=1 SV=2	119 kDa	0.0442	2	2	0.03	2	2	0.0283	2	2	0.0274	1	1	0.0168	1	1	0.0442	2	2
871	SRSF2_HUMAN	Serine/arginine-rich splicing factor 2 OS=Homo sapiens GN=SRSF2 PE=1 SV=4	25 kDa	0.113	2	2	0.113	2	2	0.113	2	2	0.113	2	2	0.0769	1	1	0.113	2	2
872	ODP2_HUMAN	Dihydrolipoyllysine-residue acetyltransferase component of pyruvate dehydrogenase complex, mitochondrial OS=Homo sapiens GN=DLAT PE=1 SV=3	69 kDa	0.0386	2	2	0.0232	1	1	0.0232	1	1	0.0355	2	2	0.0232	1	1	0.0386	2	2
873	VATE1_HUMAN	V-type proton ATPase subunit E 1 OS=Homo sapiens GN=ATP6V1E1 PE=1 SV=1	26 kDa	0.0619	1	1	0.0619	1	1	0.0619	1	1	0.0619	1	1	0.0619	1	1	0.119	2	2
874	PECR_HUMAN	Peroxisomal trans-2-enoyl-CoA reductase OS=Homo sapiens GN=PECR PE=1 SV=2	33 kDa	0.0957	2	2	0.0561	1	1	0	0	0	0.149	2	2	0	0	0	0.0396	1	1
875	AGM1_HUMAN	Phosphoacetylglucosamine mutase OS=Homo sapiens GN=PGM3 PE=1 SV=1	60 kDa	0.125	4	4	0.0554	2	2	0.111	3	3	0.0314	1	1	0.111	3	3	0	0	0
876	LC7L2_HUMAN	Putative RNA-binding protein Luc7-like 2 OS=Homo sapiens GN=LUC7L2 PE=1 SV=2	47 kDa	0.0842	2	1	0.0842	2	1	0.145	4	3	0.0638	2	2	0	0	0	0.0842	2	1
877	NOMO1_HUMAN	Nodal modulator 1 OS=Homo sapiens GN=NOMO1 PE=1 SV=5	134 kDa	0.0237	2	2	0.0147	1	1	0.0147	1	1	0.036	3	3	0.0237	2	2	0.0376	3	3
878	P4HA1_HUMAN	Prolyl 4-hydroxylase subunit alpha-1 OS=Homo sapiens GN=P4HA1 PE=1 SV=2	61 kDa	0.0955	3	3	0.116	4	4	0.0693	2	2	0	0	0	0	0	0	0	0	0
879	TCEA1_HUMAN	Transcription elongation factor A protein 1 OS=Homo sapiens GN=TCEA1 PE=1 SV=2	34 kDa	0.0764	2	2	0.12	3	3	0.0764	2	2	0.0864	2	2	0.0432	1	1	0.0864	2	2
880	IQGA1_HUMAN	Ras GTPase-activating-like protein IQGAP1 OS=Homo sapiens GN=IQGAP1 PE=1 SV=1	189 kDa	0.0109	1	1	0.0151	1	1	0.0109	1	1	0.026	2	2	0.0308	3	3	0.035	3	3
881	STT3A_HUMAN	Dolichyl-diphosphooligosaccharide--protein glycosyltransferase subunit STT3A OS=Homo sapiens GN=STT3A PE=1 SV=2	81 kDa	0.0241	2	2	0.0298	2	2	0.0298	2	2	0.0511	3	3	0	0	0	0.0113	1	1
882	AL7A1_HUMAN	Alpha-aminoadipic semialdehyde dehydrogenase OS=Homo sapiens GN=ALDH7A1 PE=1 SV=5	58 kDa	0.121	3	3	0.0315	1	1	0.0315	1	1	0.0816	2	2	0.0816	2	2	0.0816	2	2
883	PYGL_HUMAN	Glycogen phosphorylase, liver form OS=Homo sapiens GN=PYGL PE=1 SV=4	97 kDa	0.0401	3	2	0.0401	3	2	0.026	2	1	0.0307	2	2	0.0236	2	1	0.0295	2	2
884	ABCE1_HUMAN	ATP-binding cassette sub-family E member 1 OS=Homo sapiens GN=ABCE1 PE=1 SV=1	67 kDa	0.0618	2	2	0.0618	2	2	0.0618	2	2	0.0584	2	2	0.025	1	1	0.0284	1	1
885	CBR1_HUMAN	Carbonyl reductase [NADPH] 1 OS=Homo sapiens GN=CBR1 PE=1 SV=3	30 kDa	0.105	2	2	0.0469	1	1	0.0578	1	1	0.101	2	2	0.101	2	2	0.101	2	2
886	CX7A2_HUMAN	Cytochrome c oxidase subunit 7A2, mitochondrial OS=Homo sapiens GN=COX7A2 PE=1 SV=1	9 kDa	0.277	2	2	0.277	2	2	0.157	1	1	0.277	2	2	0.157	1	1	0.157	1	1
887	GALM_HUMAN	Aldose 1-epimerase OS=Homo sapiens GN=GALM PE=1 SV=1	38 kDa	0.0263	1	1	0.0789	2	2	0.0789	2	2	0.0556	1	1	0.0556	1	1	0.0819	2	2
888	NH2L1_HUMAN	NHP2-like protein 1 OS=Homo sapiens GN=NHP2L1 PE=1 SV=3	14 kDa	0.188	2	2	0.188	2	2	0.0938	1	1	0.188	2	2	0.0938	1	1	0.188	2	2
889	TMX1_HUMAN	Thioredoxin-related transmembrane protein 1 OS=Homo sapiens GN=TMX1 PE=1 SV=1	32 kDa	0.0464	1	1	0.0893	2	2	0.0464	1	1	0.0893	2	2	0.0893	2	2	0.0893	2	2
890	UCHL3_HUMAN	Ubiquitin carboxyl-terminal hydrolase isozyme L3 OS=Homo sapiens GN=UCHL3 PE=1 SV=1	26 kDa	0.087	1	1	0.087	1	1	0.157	2	2	0.087	1	1	0.13	2	2	0.157	2	2
891	MPC2_HUMAN	Mitochondrial pyruvate carrier 2 OS=Homo sapiens GN=MPC2 PE=1 SV=1	14 kDa	0.189	2	2	0.189	2	2	0.189	2	2	0.189	2	2	0.189	2	2	0.0945	1	1
892	EIF3K_HUMAN	Eukaryotic translation initiation factor 3 subunit K OS=Homo sapiens GN=EIF3K PE=1 SV=1	25 kDa	0.128	2	2	0.128	2	2	0.128	2	2	0.0642	1	1	0.0642	1	1	0.0642	1	1
893	EIF3I_HUMAN	Eukaryotic translation initiation factor 3 subunit I OS=Homo sapiens GN=EIF3I PE=1 SV=1	37 kDa	0.0831	2	2	0.0492	1	1	0.0831	2	2	0.0831	2	2	0	0	0	0.0831	2	2
894	EIF3L_HUMAN	Eukaryotic translation initiation factor 3 subunit L OS=Homo sapiens GN=EIF3L PE=1 SV=1	67 kDa	0.0461	1	1	0.0461	1	1	0.0638	2	2	0	0	0	0.0408	2	2	0.023	1	1
895.1	SRSF4_HUMAN (+1)	Serine/arginine-rich splicing factor 4 OS=Homo sapiens GN=SRSF4 PE=1 SV=2	57 kDa	0.0182	1	0	0.0182	1	0	0.0182	1	0	0.0182	1	0	0.0182	1	0	0.0182	1	0
895.2	SRSF5_HUMAN	Serine/arginine-rich splicing factor 5 OS=Homo sapiens GN=SRSF5 PE=1 SV=1	31 kDa	0.0331	1	0	0.0846	2	1	0.0331	1	0	0.0331	1	0	0.0331	1	0	0.0331	1	0
896	AAAT_HUMAN	Neutral amino acid transporter B(0) OS=Homo sapiens GN=SLC1A5 PE=1 SV=2	57 kDa	0.0444	2	2	0.0813	3	3	0	0	0	0.0203	1	1	0.0203	1	1	0.0813	3	3
897	ADHX_HUMAN	Alcohol dehydrogenase class-3 OS=Homo sapiens GN=ADH5 PE=1 SV=4	40 kDa	0.0588	1	1	0.0856	2	2	0.0588	1	1	0.134	4	4	0.0829	2	2	0.128	3	3
898	DCXR_HUMAN	L-xylulose reductase OS=Homo sapiens GN=DCXR PE=1 SV=2	26 kDa	0	0	0	0.041	1	1	0	0	0	0.115	3	3	0.115	3	3	0.197	3	3
899	MP2K2_HUMAN	Dual specificity mitogen-activated protein kinase kinase 2 OS=Homo sapiens GN=MAP2K2 PE=1 SV=1	44 kDa	0.12	2	2	0.12	2	2	0.15	3	3	0.0325	1	1	0.0325	1	1	0.0325	1	1
900	NDUV2_HUMAN	NADH dehydrogenase [ubiquinone] flavoprotein 2, mitochondrial OS=Homo sapiens GN=NDUFV2 PE=1 SV=2	27 kDa	0.0522	1	1	0.0522	1	1	0.0522	1	1	0.137	3	3	0.137	3	3	0.0924	2	2
901	RM04_HUMAN	39S ribosomal protein L4, mitochondrial OS=Homo sapiens GN=MRPL4 PE=1 SV=1	35 kDa	0.09	2	2	0.0514	1	1	0.0514	1	1	0.18	3	3	0.183	3	3	0.0514	1	1
902	SART3_HUMAN	Squamous cell carcinoma antigen recognized by T-cells 3 OS=Homo sapiens GN=SART3 PE=1 SV=1	110 kDa	0.0208	1	1	0	0	0	0	0	0	0.0415	3	3	0.0301	2	2	0.0447	3	3
903	VINC_HUMAN	Vinculin OS=Homo sapiens GN=VCL PE=1 SV=4	124 kDa	0.0282	2	2	0.0185	1	1	0.0397	3	3	0.0238	2	2	0.0838	6	6	0.03	2	2
904	COASY_HUMAN	Bifunctional coenzyme A synthase OS=Homo sapiens GN=COASY PE=1 SV=4	62 kDa	0.0479	2	2	0.0266	1	1	0.0266	1	1	0.0887	3	3	0.0674	2	2	0.0479	2	2
905	GLRX3_HUMAN	Glutaredoxin-3 OS=Homo sapiens GN=GLRX3 PE=1 SV=2	37 kDa	0.134	3	3	0.0597	2	2	0.0328	1	1	0.0328	1	1	0.0567	2	2	0.0328	1	1
906	GMDS_HUMAN	GDP-mannose 4,6 dehydratase OS=Homo sapiens GN=GMDS PE=1 SV=1	42 kDa	0.0538	1	1	0.0968	2	2	0.0538	1	1	0.0968	2	2	0.043	1	1	0.121	3	3
907	CRKL_HUMAN	Crk-like protein OS=Homo sapiens GN=CRKL PE=1 SV=1	34 kDa	0.106	2	2	0.106	2	2	0.106	2	2	0.0561	1	1	0.0561	1	1	0	0	0
908	SSRP1_HUMAN	FACT complex subunit SSRP1 OS=Homo sapiens GN=SSRP1 PE=1 SV=1	81 kDa	0.0339	1	1	0.031	2	2	0.031	2	2	0.0494	2	2	0	0	0	0.0367	2	2
909	DRG1_HUMAN	Developmentally-regulated GTP-binding protein 1 OS=Homo sapiens GN=DRG1 PE=1 SV=1	41 kDa	0.0381	1	1	0.0708	2	2	0.0381	1	1	0.0381	1	1	0.0381	1	1	0.0381	1	1
910	F213A_HUMAN	Redox-regulatory protein FAM213A OS=Homo sapiens GN=FAM213A PE=1 SV=3	26 kDa	0.144	2	2	0.144	2	2	0.114	2	2	0.114	2	2	0.114	2	2	0.0655	1	1
911	TMM33_HUMAN	Transmembrane protein 33 OS=Homo sapiens GN=TMEM33 PE=1 SV=2	28 kDa	0.117	2	2	0.0486	1	1	0.117	2	2	0.0486	1	1	0.081	2	2	0.081	2	2
912	MBNL3_HUMAN	Muscleblind-like protein 3 OS=Homo sapiens GN=MBNL3 PE=2 SV=2	39 kDa	0.0311	1	1	0.105	2	2	0.0311	1	1	0.0311	1	1	0.0311	1	1	0.0311	1	1
913	PSDE_HUMAN	26S proteasome non-ATPase regulatory subunit 14 OS=Homo sapiens GN=PSMD14 PE=1 SV=1	35 kDa	0.119	2	2	0	0	0	0.0742	1	1	0.0742	1	1	0.0516	1	1	0.0742	1	1
914.1	PYRG1_HUMAN	CTP synthase 1 OS=Homo sapiens GN=CTPS1 PE=1 SV=2	67 kDa	0.0305	1	1	0.0508	2	2	0.0305	1	1	0.0508	2	1	0	0	0	0.0305	1	1
914.2	PYRG2_HUMAN	CTP synthase 2 OS=Homo sapiens GN=CTPS2 PE=1 SV=1	66 kDa	0	0	0	0.0358	1	1	0.0358	1	1	0.0205	1	0	0	0	0	0	0	0
915.1	DYN2_HUMAN	Dynamin-2 OS=Homo sapiens GN=DNM2 PE=1 SV=2	98 kDa	0.0989	5	4	0.0253	2	2	0.046	3	1	0.0126	1	1	0	0	0	0	0	0
915.2	DYN1_HUMAN	Dynamin-1 OS=Homo sapiens GN=DNM1 PE=1 SV=2	97 kDa	0	0	0	0	0	0	0	0	0	0	0	0	0	0	0	0	0	0
916	ARL1_HUMAN	ADP-ribosylation factor-like protein 1 OS=Homo sapiens GN=ARL1 PE=1 SV=1	20 kDa	0.0773	1	1	0.138	2	2	0.166	2	2	0.227	3	3	0.138	2	2	0.0773	1	1
917	ARPC3_HUMAN	Actin-related protein 2/3 complex subunit 3 OS=Homo sapiens GN=ARPC3 PE=1 SV=3	21 kDa	0.0618	1	1	0.0618	1	1	0.0618	1	1	0	0	0	0	0	0	0.27	4	4
918	CHRD1_HUMAN	Cysteine and histidine-rich domain-containing protein 1 OS=Homo sapiens GN=CHORDC1 PE=1 SV=2	37 kDa	0.172	3	3	0.123	2	2	0.123	2	2	0.0753	1	1	0.0482	1	1	0	0	0
919	DEST_HUMAN	Destrin OS=Homo sapiens GN=DSTN PE=1 SV=3	19 kDa	0.0727	1	1	0.0727	1	1	0.0727	1	1	0.139	3	3	0.0727	2	2	0.139	3	3
920	IF5_HUMAN	Eukaryotic translation initiation factor 5 OS=Homo sapiens GN=EIF5 PE=1 SV=2	49 kDa	0.0348	1	1	0.058	2	2	0.114	3	3	0.058	2	2	0.0232	1	1	0.0232	1	1
921	ILEU_HUMAN	Leukocyte elastase inhibitor OS=Homo sapiens GN=SERPINB1 PE=1 SV=1	43 kDa	0.029	1	1	0.066	2	2	0.029	1	1	0.0396	1	1	0.0712	2	2	0.119	3	3
922	OPA1_HUMAN	Dynamin-like 120 kDa protein, mitochondrial OS=Homo sapiens GN=OPA1 PE=1 SV=3	112 kDa	0.0417	2	2	0.0417	2	2	0.0229	1	1	0.0667	4	4	0.0552	3	3	0.0396	2	2
923	SYFB_HUMAN	Phenylalanine--tRNA ligase beta subunit OS=Homo sapiens GN=FARSB PE=1 SV=3	66 kDa	0.0679	3	3	0.0374	2	2	0.0221	1	1	0.0374	2	2	0.0153	1	1	0.0221	1	1
924	VAT1_HUMAN	Synaptic vesicle membrane protein VAT-1 homolog OS=Homo sapiens GN=VAT1 PE=1 SV=2	42 kDa	0.0305	1	1	0.0763	2	2	0.0662	2	2	0.0763	2	2	0.0356	1	1	0.107	3	3
925	AT1B3_HUMAN	Sodium/potassium-transporting ATPase subunit beta-3 OS=Homo sapiens GN=ATP1B3 PE=1 SV=1	32 kDa	0.179	3	3	0.179	3	3	0.179	3	3	0	0	0	0.0538	1	1	0	0	0
926	FABPL_HUMAN	Fatty acid-binding protein, liver OS=Homo sapiens GN=FABP1 PE=1 SV=1	14 kDa	0.0866	1	1	0.0866	1	1	0.0866	1	1	0.165	2	2	0.165	2	2	0.228	3	3
927	PR40A_HUMAN	Pre-mRNA-processing factor 40 homolog A OS=Homo sapiens GN=PRPF40A PE=1 SV=2	109 kDa	0.0575	3	3	0.0575	3	3	0.0397	2	2	0.0272	2	2	0.0188	1	1	0.0178	1	1
928	SRSF7_HUMAN	Serine/arginine-rich splicing factor 7 OS=Homo sapiens GN=SRSF7 PE=1 SV=1	27 kDa	0.0882	1	1	0.0882	1	1	0	0	0	0.139	2	2	0.176	3	3	0.139	2	2
929	BIEA_HUMAN	Biliverdin reductase A OS=Homo sapiens GN=BLVRA PE=1 SV=2	33 kDa	0.0912	2	2	0.0709	2	2	0.0912	2	2	0.0439	1	1	0.0912	2	2	0.118	3	3
930	RD23B_HUMAN	UV excision repair protein RAD23 homolog B OS=Homo sapiens GN=RAD23B PE=1 SV=1	43 kDa	0.0465	1	1	0	0	0	0.0465	1	1	0.0954	2	2	0.0954	2	2	0.142	3	3
931	EWS_HUMAN	RNA-binding protein EWS OS=Homo sapiens GN=EWSR1 PE=1 SV=1	68 kDa	0.0503	3	3	0.0503	2	2	0.0442	2	2	0.0213	1	1	0	0	0	0.0229	1	1
932	ROA0_HUMAN	Heterogeneous nuclear ribonucleoprotein A0 OS=Homo sapiens GN=HNRNPA0 PE=1 SV=1	31 kDa	0.0787	2	1	0.121	2	2	0.121	2	2	0.115	2	2	0.115	2	2	0.0492	1	1
933	ENOG_HUMAN	Gamma-enolase OS=Homo sapiens GN=ENO2 PE=1 SV=3	47 kDa	0.182	4	2	0.127	3	1	0.157	4	2	0.182	4	2	0.152	3	1	0.122	3	1
934	HDGF_HUMAN	Hepatoma-derived growth factor OS=Homo sapiens GN=HDGF PE=1 SV=1	27 kDa	0.15	3	2	0.0333	1	0	0.112	2	2	0.112	2	2	0.112	2	2	0.0708	1	1
935	RPB2_HUMAN	DNA-directed RNA polymerase II subunit RPB2 OS=Homo sapiens GN=POLR2B PE=1 SV=1	134 kDa	0.0281	2	2	0	0	0	0.0162	1	1	0	0	0	0	0	0	0	0	0
936	VISL1_HUMAN	Visinin-like protein 1 OS=Homo sapiens GN=VSNL1 PE=1 SV=2	22 kDa	0.141	2	2	0.141	2	2	0.0838	1	1	0.0524	1	1	0.0576	1	1	0.0576	1	1
937	DC1I2_HUMAN	Cytoplasmic dynein 1 intermediate chain 2 OS=Homo sapiens GN=DYNC1I2 PE=1 SV=3	71 kDa	0.0329	1	1	0.0329	1	1	0.0658	2	2	0.0329	1	1	0.0329	1	1	0.0329	1	1
938	PCY2_HUMAN	Ethanolamine-phosphate cytidylyltransferase OS=Homo sapiens GN=PCYT2 PE=1 SV=1	44 kDa	0.0488	1	1	0.0488	1	1	0.0488	1	1	0.0797	2	2	0.0797	2	2	0.0797	2	2
939.1	KAPCA_HUMAN	cAMP-dependent protein kinase catalytic subunit alpha OS=Homo sapiens GN=PRKACA PE=1 SV=2	41 kDa	0.142	3	2	0.0883	2	2	0.0883	2	2	0.0484	1	1	0.0484	1	1	0	0	0
939.2	KAPCG_HUMAN	cAMP-dependent protein kinase catalytic subunit gamma OS=Homo sapiens GN=PRKACG PE=1 SV=3	40 kDa	0	0	0	0	0	0	0	0	0	0	0	0	0	0	0	0	0	0
940	DEK_HUMAN	Protein DEK OS=Homo sapiens GN=DEK PE=1 SV=1	43 kDa	0.064	2	2	0.0987	3	3	0.0987	3	3	0.0267	1	1	0	0	0	0	0	0
941	EFHD2_HUMAN	EF-hand domain-containing protein D2 OS=Homo sapiens GN=EFHD2 PE=1 SV=1	27 kDa	0.0875	2	2	0.129	3	3	0.196	4	4	0.0875	2	2	0	0	0	0	0	0
942	GSLG1_HUMAN	Golgi apparatus protein 1 OS=Homo sapiens GN=GLG1 PE=1 SV=2	135 kDa	0.0407	3	3	0.045	3	3	0.0407	3	3	0.0153	1	1	0	0	0	0	0	0
943	HSDL2_HUMAN	Hydroxysteroid dehydrogenase-like protein 2 OS=Homo sapiens GN=HSDL2 PE=1 SV=1	45 kDa	0.124	3	3	0.0359	1	1	0.132	3	3	0.0431	1	1	0.0431	1	1	0.0957	2	2
944	HUWE1_HUMAN	E3 ubiquitin-protein ligase HUWE1 OS=Homo sapiens GN=HUWE1 PE=1 SV=3	482 kDa	0.0171	4	4	0.0096	2	2	0.00503	1	1	0.0064	2	2	0.0114	2	2	0.00503	1	1
945	PSA3_HUMAN	Proteasome subunit alpha type-3 OS=Homo sapiens GN=PSMA3 PE=1 SV=2	28 kDa	0.141	3	3	0.149	3	3	0.188	4	4	0.0549	1	1	0	0	0	0.0549	1	1
946	PSME3_HUMAN	Proteasome activator complex subunit 3 OS=Homo sapiens GN=PSME3 PE=1 SV=1	30 kDa	0.165	3	3	0.118	2	2	0.118	2	2	0	0	0	0.0591	1	1	0	0	0
947	SCFD1_HUMAN	Sec1 family domain-containing protein 1 OS=Homo sapiens GN=SCFD1 PE=1 SV=4	72 kDa	0.0218	1	1	0.0685	3	3	0.0483	2	2	0.0265	1	1	0.0265	1	1	0.0483	2	2
948	SP16H_HUMAN	FACT complex subunit SPT16 OS=Homo sapiens GN=SUPT16H PE=1 SV=1	120 kDa	0.0134	1	1	0.0134	1	1	0.0497	3	3	0.0611	3	3	0.0411	2	2	0.0162	1	1
949	PLOD2_HUMAN	Procollagen-lysine,2-oxoglutarate 5-dioxygenase 2 OS=Homo sapiens GN=PLOD2 PE=1 SV=2	85 kDa	0.0353	2	2	0.0163	1	1	0.0529	3	3	0	0	0	0	0	0	0	0	0
950	SSBP_HUMAN	Single-stranded DNA-binding protein, mitochondrial OS=Homo sapiens GN=SSBP1 PE=1 SV=1	17 kDa	0	0	0	0	0	0	0	0	0	0.162	2	2	0.162	2	2	0.162	2	2
951	XRN2_HUMAN	5'-3' exoribonuclease 2 OS=Homo sapiens GN=XRN2 PE=1 SV=1	109 kDa	0.0379	3	3	0.0137	1	1	0.0242	2	2	0.0116	1	1	0	0	0	0	0	0
952	CDV3_HUMAN	Protein CDV3 homolog OS=Homo sapiens GN=CDV3 PE=1 SV=1	27 kDa	0	0	0	0.101	2	2	0.128	2	2	0.159	2	2	0	0	0	0.128	2	2
953	DECR2_HUMAN	Peroxisomal 2,4-dienoyl-CoA reductase OS=Homo sapiens GN=DECR2 PE=1 SV=1	31 kDa	0	0	0	0.0925	2	2	0.0616	1	1	0.0719	2	2	0	0	0	0.0308	1	1
954	F162A_HUMAN	Protein FAM162A OS=Homo sapiens GN=FAM162A PE=1 SV=2	17 kDa	0.201	2	2	0.13	1	1	0.201	2	2	0.13	1	1	0.13	1	1	0.13	1	1
955	TPM3L_HUMAN	Putative tropomyosin alpha-3 chain-like protein OS=Homo sapiens PE=5 SV=2	26 kDa	0.117	2	1	0.117	2	1	0.117	3	2	0.103	2	1	0.117	3	2	0.117	2	1
956	FN3K_HUMAN	Fructosamine-3-kinase OS=Homo sapiens GN=FN3K PE=1 SV=1	35 kDa	0.1	2	2	0.1	2	2	0.1	2	2	0.055	1	1	0.055	1	1	0.055	1	1
957	NAA10_HUMAN	N-alpha-acetyltransferase 10 OS=Homo sapiens GN=NAA10 PE=1 SV=1	26 kDa	0.106	1	1	0.187	2	2	0.187	2	2	0.0809	1	1	0.187	2	2	0.187	2	2
958	PPT1_HUMAN	Palmitoyl-protein thioesterase 1 OS=Homo sapiens GN=PPT1 PE=1 SV=1	34 kDa	0.134	2	2	0.134	2	2	0.134	2	2	0.0556	1	1	0	0	0	0.0556	1	1
959	PGAM5_HUMAN	Serine/threonine-protein phosphatase PGAM5, mitochondrial OS=Homo sapiens GN=PGAM5 PE=1 SV=2	32 kDa	0	0	0	0	0	0	0	0	0	0.0484	2	2	0.0761	2	2	0.0484	2	2
960	PCY1A_HUMAN	Choline-phosphate cytidylyltransferase A OS=Homo sapiens GN=PCYT1A PE=1 SV=2	42 kDa	0.0845	2	2	0.0436	1	1	0.0436	1	1	0.0436	1	1	0	0	0	0.0436	1	1
961	SBDS_HUMAN	Ribosome maturation protein SBDS OS=Homo sapiens GN=SBDS PE=1 SV=4	29 kDa	0	0	0	0.068	2	2	0.036	1	1	0.068	2	2	0.036	1	1	0.064	2	2
962	SMU1_HUMAN	WD40 repeat-containing protein SMU1 OS=Homo sapiens GN=SMU1 PE=1 SV=2	58 kDa	0.0526	2	2	0.0195	1	1	0.0526	2	2	0.0195	1	1	0.0195	1	1	0.0195	1	1
963	MCA3_HUMAN	Eukaryotic translation elongation factor 1 epsilon-1 OS=Homo sapiens GN=EEF1E1 PE=1 SV=1	20 kDa	0	0	0	0	0	0	0.069	1	1	0.126	2	2	0	0	0	0	0	0
964	SR140_HUMAN	U2 snRNP-associated SURP motif-containing protein OS=Homo sapiens GN=U2SURP PE=1 SV=2	118 kDa	0.0321	2	2	0.0185	1	1	0.0185	1	1	0.0136	1	1	0	0	0	0.0136	1	1
965	SNAA_HUMAN	Alpha-soluble NSF attachment protein OS=Homo sapiens GN=NAPA PE=1 SV=3	33 kDa	0.125	2	2	0.078	1	1	0.078	1	1	0.125	2	2	0.115	2	2	0.163	3	3
966	TAGL_HUMAN	Transgelin OS=Homo sapiens GN=TAGLN PE=1 SV=4	23 kDa	0	0	0	0	0	0	0	0	0	0.209	4	4	0.224	4	4	0.204	4	4
967	CLU_HUMAN	Clustered mitochondria protein homolog OS=Homo sapiens GN=KIAA0664 PE=1 SV=2	147 kDa	0.0367	3	3	0.0122	1	1	0.0183	2	2	0	0	0	0.0168	1	1	0	0	0
968	NDUAA_HUMAN	NADH dehydrogenase [ubiquinone] 1 alpha subcomplex subunit 10, mitochondrial OS=Homo sapiens GN=NDUFA10 PE=1 SV=1	41 kDa	0.104	2	2	0.062	1	1	0.135	3	3	0.062	1	1	0.062	1	1	0.062	1	1
969	PLAK_HUMAN	Junction plakoglobin OS=Homo sapiens GN=JUP PE=1 SV=3	82 kDa	0.113	5	3	0.0107	1	0	0.0752	3	2	0.0738	3	2	0.0779	3	2	0.0228	2	1
970	RRP12_HUMAN	RRP12-like protein OS=Homo sapiens GN=RRP12 PE=1 SV=2	144 kDa	0	0	0	0.00925	1	1	0.0293	2	2	0.0293	2	2	0.0293	2	2	0.00925	1	1
971	RBM14_HUMAN	RNA-binding protein 14 OS=Homo sapiens GN=RBM14 PE=1 SV=2	69 kDa	0.0448	2	2	0.0209	1	1	0.0688	3	3	0.0284	2	2	0.0284	2	2	0	0	0
972	DCTN2_HUMAN	Dynactin subunit 2 OS=Homo sapiens GN=DCTN2 PE=1 SV=4	44 kDa	0.0698	2	2	0.0349	1	1	0.0823	2	2	0.0349	1	1	0.0349	1	1	0.0823	2	2
973	PO210_HUMAN	Nuclear pore membrane glycoprotein 210 OS=Homo sapiens GN=NUP210 PE=1 SV=3	205 kDa	0.0053	1	1	0.0138	2	2	0.0138	2	2	0.0138	2	2	0.00848	1	1	0.0159	2	2
974	CCD47_HUMAN	Coiled-coil domain-containing protein 47 OS=Homo sapiens GN=CCDC47 PE=1 SV=1	56 kDa	0.0331	1	1	0.0331	1	1	0.0331	1	1	0.0331	1	1	0.0331	1	1	0.0704	2	2
975	CUTA_HUMAN	Protein CutA OS=Homo sapiens GN=CUTA PE=1 SV=2	19 kDa	0.229	2	2	0.0782	1	1	0.0782	1	1	0.0782	1	1	0.0782	1	1	0.229	2	2
976	IF2B_HUMAN	Eukaryotic translation initiation factor 2 subunit 2 OS=Homo sapiens GN=EIF2S2 PE=1 SV=2	38 kDa	0.0511	1	1	0.036	1	1	0.0751	2	2	0.036	1	1	0.0691	2	2	0.0691	2	2
977	MOT4_HUMAN	Monocarboxylate transporter 4 OS=Homo sapiens GN=SLC16A3 PE=1 SV=1	49 kDa	0.028	1	1	0.0559	2	2	0.028	1	1	0.028	1	1	0.028	1	1	0.028	1	1
978	PSB6_HUMAN	Proteasome subunit beta type-6 OS=Homo sapiens GN=PSMB6 PE=1 SV=4	25 kDa	0.046	1	1	0.0879	2	2	0.0879	2	2	0.0879	2	2	0.0879	2	2	0.0879	2	2
979	TMED7_HUMAN	Transmembrane emp24 domain-containing protein 7 OS=Homo sapiens GN=TMED7 PE=1 SV=2	25 kDa	0.0446	1	1	0.0446	1	1	0	0	0	0.103	2	2	0.103	2	2	0.103	2	2
980	PSD7_HUMAN	26S proteasome non-ATPase regulatory subunit 7 OS=Homo sapiens GN=PSMD7 PE=1 SV=2	37 kDa	0.0401	1	1	0.071	2	2	0	0	0	0.0679	2	2	0.0679	2	2	0.0679	2	2
981	DCUP_HUMAN	Uroporphyrinogen decarboxylase OS=Homo sapiens GN=UROD PE=1 SV=2	41 kDa	0.112	2	2	0.0736	1	1	0.112	2	2	0	0	0	0	0	0	0	0	0
982	CALD1_HUMAN	Caldesmon OS=Homo sapiens GN=CALD1 PE=1 SV=3	93 kDa	0.0252	1	1	0.0467	2	2	0.0252	1	1	0.0252	1	1	0.0252	1	1	0.0252	1	1
983	PRP6_HUMAN	Pre-mRNA-processing factor 6 OS=Homo sapiens GN=PRPF6 PE=1 SV=1	107 kDa	0.0234	1	1	0.0234	1	1	0.0234	1	1	0.00956	1	1	0.0106	1	1	0.0319	2	2
984	IDH3A_HUMAN	Isocitrate dehydrogenase [NAD] subunit alpha, mitochondrial OS=Homo sapiens GN=IDH3A PE=1 SV=1	40 kDa	0.0273	1	1	0.0273	1	1	0.0683	2	2	0.131	3	3	0.0273	1	1	0.041	1	1
985	KAD1_HUMAN	Adenylate kinase isoenzyme 1 OS=Homo sapiens GN=AK1 PE=1 SV=3	22 kDa	0.186	2	2	0.258	3	3	0.191	2	2	0	0	0	0.067	1	1	0.067	1	1
986	NOP2_HUMAN	Putative ribosomal RNA methyltransferase NOP2 OS=Homo sapiens GN=NOP2 PE=1 SV=2	89 kDa	0.0406	3	3	0.0222	2	2	0.0111	1	1	0.0111	1	1	0.048	3	3	0.0197	1	1
987	RM44_HUMAN	39S ribosomal protein L44, mitochondrial OS=Homo sapiens GN=MRPL44 PE=1 SV=1	38 kDa	0.0934	3	3	0.0934	2	2	0.0422	1	1	0.0512	1	1	0.0512	1	1	0.0512	1	1
988	TNPO1_HUMAN	Transportin-1 OS=Homo sapiens GN=TNPO1 PE=1 SV=2	102 kDa	0.0134	1	1	0	0	0	0.0345	2	2	0.0223	2	2	0.0356	2	2	0.049	3	3
989	CO4A_HUMAN (+1)	Complement C4-A OS=Homo sapiens GN=C4A PE=1 SV=1	193 kDa	0.0143	1	1	0.0143	1	1	0.0396	3	3	0.0149	1	1	0	0	0	0	0	0
990	UBP7_HUMAN	Ubiquitin carboxyl-terminal hydrolase 7 OS=Homo sapiens GN=USP7 PE=1 SV=2	128 kDa	0.0417	3	3	0	0	0	0.0109	1	1	0.0318	2	2	0.0163	1	1	0	0	0
991	GT251_HUMAN	Procollagen galactosyltransferase 1 OS=Homo sapiens GN=GLT25D1 PE=1 SV=1	72 kDa	0.0707	3	3	0.0241	1	1	0.0707	3	3	0	0	0	0	0	0	0	0	0
992	HEM6_HUMAN	Coproporphyrinogen-III oxidase, mitochondrial OS=Homo sapiens GN=CPOX PE=1 SV=3	50 kDa	0.0925	3	3	0.0639	2	2	0.0639	2	2	0	0	0	0	0	0	0	0	0
993	PSMD4_HUMAN	26S proteasome non-ATPase regulatory subunit 4 OS=Homo sapiens GN=PSMD4 PE=1 SV=1	41 kDa	0.0398	1	1	0.0398	1	1	0.0398	1	1	0.0398	1	1	0.119	3	3	0.0875	2	2
994	K1967_HUMAN	DBIRD complex subunit KIAA1967 OS=Homo sapiens GN=KIAA1967 PE=1 SV=2	103 kDa	0.0368	2	2	0.0368	2	2	0.0531	3	3	0.0314	2	2	0	0	0	0.0152	1	1
995	PLEC_HUMAN	Plectin OS=Homo sapiens GN=PLEC PE=1 SV=3	532 kDa	0.00406	1	0	0	0	0	0.00726	2	2	0	0	0	0	0	0	0.00406	1	0
996	TMOD3_HUMAN	Tropomodulin-3 OS=Homo sapiens GN=TMOD3 PE=1 SV=1	40 kDa	0.102	2	2	0	0	0	0	0	0	0.0483	1	1	0	0	0	0.108	2	2
997	OAT_HUMAN	Ornithine aminotransferase, mitochondrial OS=Homo sapiens GN=OAT PE=1 SV=1	49 kDa	0.0638	2	2	0.0547	2	2	0.0752	2	2	0	0	0	0	0	0	0	0	0
998	PTCD3_HUMAN	Pentatricopeptide repeat-containing protein 3, mitochondrial OS=Homo sapiens GN=PTCD3 PE=1 SV=3	79 kDa	0.0232	1	1	0.0232	1	1	0.0232	1	1	0.0421	2	2	0	0	0	0.0232	1	1
999	PEG3_HUMAN	Paternally-expressed gene 3 protein OS=Homo sapiens GN=PEG3 PE=2 SV=1	181 kDa	0.0353	3	3	0.0202	2	2	0.0202	2	2	0	0	0	0	0	0	0	0	0
1000	ABCF2_HUMAN	ATP-binding cassette sub-family F member 2 OS=Homo sapiens GN=ABCF2 PE=1 SV=2	71 kDa	0.0241	1	1	0.0465	2	2	0.0241	1	1	0.0241	1	1	0.0241	1	1	0	0	0
1001	ACSF2_HUMAN	Acyl-CoA synthetase family member 2, mitochondrial OS=Homo sapiens GN=ACSF2 PE=1 SV=2	68 kDa	0.0618	2	2	0.0618	2	2	0.0309	1	1	0.0618	2	2	0.0309	1	1	0.0309	1	1
1002	AIMP2_HUMAN	Aminoacyl tRNA synthase complex-interacting multifunctional protein 2 OS=Homo sapiens GN=AIMP2 PE=1 SV=2	35 kDa	0.0938	2	2	0	0	0	0.0812	1	1	0	0	0	0.0531	1	1	0	0	0
1003	EHD1_HUMAN	EH domain-containing protein 1 OS=Homo sapiens GN=EHD1 PE=1 SV=2	61 kDa	0.0431	1	1	0.0768	2	2	0.0431	1	1	0.0431	1	1	0.0431	1	1	0.0599	2	1
1004	PPCE_HUMAN	Prolyl endopeptidase OS=Homo sapiens GN=PREP PE=1 SV=2	81 kDa	0.0451	2	2	0.0451	2	2	0.0239	1	1	0.0239	1	1	0.0521	2	2	0.0239	1	1
1005	PUR4_HUMAN	Phosphoribosylformylglycinamidine synthase OS=Homo sapiens GN=PFAS PE=1 SV=4	145 kDa	0.0164	1	1	0.0164	1	1	0.0329	2	2	0.0329	2	2	0	0	0	0	0	0
1006	RUVB2_HUMAN	RuvB-like 2 OS=Homo sapiens GN=RUVBL2 PE=1 SV=3	51 kDa	0.0605	2	2	0.0605	2	2	0.0238	1	1	0.0713	2	2	0.0713	2	2	0.0346	1	1
1007	SRPRB_HUMAN	Signal recognition particle receptor subunit beta OS=Homo sapiens GN=SRPRB PE=1 SV=3	30 kDa	0.059	1	1	0.059	1	1	0.059	1	1	0.059	1	1	0.107	2	2	0.059	1	1
1008	ACSL1_HUMAN	Long-chain-fatty-acid--CoA ligase 1 OS=Homo sapiens GN=ACSL1 PE=1 SV=1	78 kDa	0.0258	1	1	0.0258	1	1	0.0258	1	1	0.0602	3	3	0.0258	1	1	0.043	2	2
1009	LACB2_HUMAN	Beta-lactamase-like protein 2 OS=Homo sapiens GN=LACTB2 PE=1 SV=2	33 kDa	0.0903	2	2	0.0278	1	1	0.0903	2	2	0	0	0	0	0	0	0.0625	1	1
1010	PAPS1_HUMAN	Bifunctional 3'-phosphoadenosine 5'-phosphosulfate synthase 1 OS=Homo sapiens GN=PAPSS1 PE=1 SV=2	71 kDa	0.0577	2	2	0.0673	2	2	0.0321	1	1	0.0353	1	1	0	0	0	0	0	0
1011	COPZ1_HUMAN	Coatomer subunit zeta-1 OS=Homo sapiens GN=COPZ1 PE=1 SV=1	20 kDa	0.13	1	1	0.13	1	1	0.13	1	1	0.192	2	2	0.13	1	1	0.13	1	1
1012	KAP2_HUMAN	cAMP-dependent protein kinase type II-alpha regulatory subunit OS=Homo sapiens GN=PRKAR2A PE=1 SV=2	46 kDa	0	0	0	0	0	0	0.0347	1	1	0.0421	1	1	0	0	0	0.0767	2	2
1013	RFA1_HUMAN	Replication protein A 70 kDa DNA-binding subunit OS=Homo sapiens GN=RPA1 PE=1 SV=2	68 kDa	0.0406	1	1	0.0406	1	1	0.0406	1	1	0.0406	1	1	0.0601	2	2	0.0406	1	1
1014	SYNE1_HUMAN	Nesprin-1 OS=Homo sapiens GN=SYNE1 PE=1 SV=3	1011 kDa	0.00239	2	2	0.00114	1	1	0.00114	1	1	0.00114	1	1	0	0	0	0	0	0
1015	FTCD_HUMAN	Formimidoyltransferase-cyclodeaminase OS=Homo sapiens GN=FTCD PE=1 SV=2	59 kDa	0.0628	2	2	0.0388	1	1	0.0388	1	1	0.0388	1	1	0.0388	1	1	0.0388	1	1
1016.1	STAM1_HUMAN	Signal transducing adapter molecule 1 OS=Homo sapiens GN=STAM PE=1 SV=3	59 kDa	0.0463	1	1	0.0981	3	3	0.0759	2	2	0.0185	1	0	0	0	0	0	0	0
1016.2	STAM2_HUMAN	Signal transducing adapter molecule 2 OS=Homo sapiens GN=STAM2 PE=1 SV=1	58 kDa	0	0	0	0	0	0	0	0	0	0	0	0	0	0	0	0	0	0
1017	GLGB_HUMAN	1,4-alpha-glucan-branching enzyme OS=Homo sapiens GN=GBE1 PE=1 SV=3	80 kDa	0.0413	2	2	0.0413	2	2	0.0912	4	4	0	0	0	0.0242	1	1	0.0242	1	1
1018	PPAC_HUMAN	Low molecular weight phosphotyrosine protein phosphatase OS=Homo sapiens GN=ACP1 PE=1 SV=3	18 kDa	0	0	0	0.0696	1	1	0.0696	1	1	0.215	3	3	0.19	3	3	0.152	2	2
1019	CPLX2_HUMAN	Complexin-2 OS=Homo sapiens GN=CPLX2 PE=1 SV=2	15 kDa	0.291	2	2	0.112	1	1	0.373	3	3	0.112	1	1	0.112	1	1	0	0	0
1020	SAMH1_HUMAN	SAM domain and HD domain-containing protein 1 OS=Homo sapiens GN=SAMHD1 PE=1 SV=2	72 kDa	0.0511	2	2	0.0511	2	2	0.0847	3	3	0	0	0	0	0	0	0	0	0
1021	BAZ1B_HUMAN	Tyrosine-protein kinase BAZ1B OS=Homo sapiens GN=BAZ1B PE=1 SV=2	171 kDa	0.00809	1	1	0.0256	3	3	0	0	0	0.0108	1	1	0.0108	1	1	0	0	0
1022	RRP5_HUMAN	Protein RRP5 homolog OS=Homo sapiens GN=PDCD11 PE=1 SV=3	209 kDa	0	0	0	0.0155	2	2	0	0	0	0.0187	3	3	0.00748	1	1	0	0	0
1023	CSRP1_HUMAN	Cysteine and glycine-rich protein 1 OS=Homo sapiens GN=CSRP1 PE=1 SV=3	21 kDa	0.114	1	1	0.202	2	2	0.202	2	2	0.114	1	1	0.202	2	2	0	0	0
1024	TM214_HUMAN	Transmembrane protein 214 OS=Homo sapiens GN=TMEM214 PE=1 SV=2	77 kDa	0.0522	2	2	0.0522	2	2	0.0522	2	2	0	0	0	0	0	0	0.0348	1	1
1025	ERH_HUMAN	Enhancer of rudimentary homolog OS=Homo sapiens GN=ERH PE=1 SV=1	12 kDa	0.308	2	2	0.308	2	2	0.144	1	1	0.106	1	1	0	0	0	0.106	1	1
1026	NAT10_HUMAN	N-acetyltransferase 10 OS=Homo sapiens GN=NAT10 PE=1 SV=2	116 kDa	0.0166	1	1	0	0	0	0	0	0	0.04	2	2	0.0146	1	1	0.0146	1	1
1027	KTHY_HUMAN	Thymidylate kinase OS=Homo sapiens GN=DTYMK PE=1 SV=4	24 kDa	0.137	2	2	0.0566	1	1	0.0566	1	1	0.0472	1	1	0.0377	1	1	0.0472	1	1
1028	IMA2_HUMAN	Importin subunit alpha-2 OS=Homo sapiens GN=KPNA2 PE=1 SV=1	58 kDa	0.0662	2	2	0.0662	2	2	0.0662	2	2	0.0378	1	1	0.0284	1	1	0	0	0
1029	NDUA5_HUMAN	NADH dehydrogenase [ubiquinone] 1 alpha subcomplex subunit 5 OS=Homo sapiens GN=NDUFA5 PE=1 SV=3	13 kDa	0.0862	1	1	0.224	2	2	0.129	2	2	0.0862	1	1	0.0862	1	1	0.0862	1	1
1030	PDXD1_HUMAN	Pyridoxal-dependent decarboxylase domain-containing protein 1 OS=Homo sapiens GN=PDXDC1 PE=1 SV=2	87 kDa	0.0495	2	2	0.0495	2	2	0.0495	2	2	0.0254	1	1	0.0254	1	1	0	0	0
1031	RFA3_HUMAN	Replication protein A 14 kDa subunit OS=Homo sapiens GN=RPA3 PE=1 SV=1	14 kDa	0.14	1	1	0.14	1	1	0.298	2	2	0.14	1	1	0.14	1	1	0.14	1	1
1032	FUBP3_HUMAN	Far upstream element-binding protein 3 OS=Homo sapiens GN=FUBP3 PE=1 SV=2	62 kDa	0.0542	2	2	0.0315	1	1	0.0315	1	1	0.0315	1	1	0	0	0	0	0	0
1033	TXD12_HUMAN	Thioredoxin domain-containing protein 12 OS=Homo sapiens GN=TXNDC12 PE=1 SV=1	19 kDa	0.0523	1	1	0.14	2	2	0.14	2	2	0.0872	1	1	0.0872	1	1	0.0872	1	1
1034	RL28_HUMAN	60S ribosomal protein L28 OS=Homo sapiens GN=RPL28 PE=1 SV=3	16 kDa	0.139	2	2	0.139	2	2	0.139	2	2	0	0	0	0.0803	1	1	0.0584	1	1
1035	IVD_HUMAN	Isovaleryl-CoA dehydrogenase, mitochondrial OS=Homo sapiens GN=IVD PE=1 SV=1	46 kDa	0.0591	1	1	0.0591	1	1	0.0591	1	1	0.0827	2	2	0.0827	2	2	0.0591	1	1
1036	AFG32_HUMAN	AFG3-like protein 2 OS=Homo sapiens GN=AFG3L2 PE=1 SV=2	89 kDa	0.0251	1	1	0.0251	1	1	0.0251	1	1	0.0351	2	2	0	0	0	0.0351	2	2
1037	HNRH3_HUMAN	Heterogeneous nuclear ribonucleoprotein H3 OS=Homo sapiens GN=HNRNPH3 PE=1 SV=2	37 kDa	0.0491	1	1	0.0491	1	1	0.0723	2	1	0.0491	1	1	0.0491	1	1	0.078	2	2
1038	NDUA8_HUMAN	NADH dehydrogenase [ubiquinone] 1 alpha subcomplex subunit 8 OS=Homo sapiens GN=NDUFA8 PE=1 SV=3	20 kDa	0.0756	1	1	0.0756	1	1	0.0756	1	1	0.18	2	2	0.0756	1	1	0	0	0
1039	ZN638_HUMAN	Zinc finger protein 638 OS=Homo sapiens GN=ZNF638 PE=1 SV=2	221 kDa	0	0	0	0	0	0	0.0126	2	2	0.00404	1	1	0.0126	2	2	0.00809	2	2
1040.1	LAP2B_HUMAN	Lamina-associated polypeptide 2, isoforms beta/gamma OS=Homo sapiens GN=TMPO PE=1 SV=2	51 kDa	0.0286	1	1	0.0286	1	1	0.0837	3	1	0.0507	1	0	0	0	0	0.0507	1	0
1040.2	LAP2A_HUMAN	Lamina-associated polypeptide 2, isoform alpha OS=Homo sapiens GN=TMPO PE=1 SV=2	75 kDa	0	0	0	0	0	0	0.036	2	0	0.0331	1	0	0	0	0	0.0331	1	0
1041	RAVR1_HUMAN	Ribonucleoprotein PTB-binding 1 OS=Homo sapiens GN=RAVER1 PE=1 SV=1	64 kDa	0.117	4	4	0.0347	1	1	0.0281	1	1	0.0347	1	1	0.0363	1	1	0.0347	1	1
1042	DPP3_HUMAN	Dipeptidyl peptidase 3 OS=Homo sapiens GN=DPP3 PE=1 SV=2	83 kDa	0.0136	1	1	0.0488	3	3	0.0136	1	1	0.038	2	2	0.0244	1	1	0.0244	1	1
1043	MGN2_HUMAN (+1)	Protein mago nashi homolog 2 OS=Homo sapiens GN=MAGOHB PE=1 SV=1	17 kDa	0	0	0	0.135	1	1	0.135	1	1	0.264	3	3	0.209	2	2	0.135	1	1
1044	RT29_HUMAN	28S ribosomal protein S29, mitochondrial OS=Homo sapiens GN=DAP3 PE=1 SV=1	46 kDa	0.121	3	3	0.0553	1	1	0.101	2	2	0.0377	1	1	0	0	0	0	0	0
1045	TM9S4_HUMAN	Transmembrane 9 superfamily member 4 OS=Homo sapiens GN=TM9SF4 PE=1 SV=2	75 kDa	0.0327	1	1	0	0	0	0.0327	1	1	0.0623	2	2	0.0841	3	3	0.0623	2	2
1046	SH3G1_HUMAN	Endophilin-A2 OS=Homo sapiens GN=SH3GL1 PE=1 SV=1	41 kDa	0.0815	2	2	0.0815	2	2	0.0815	2	2	0	0	0	0	0	0	0	0	0
1047	VASP_HUMAN	Vasodilator-stimulated phosphoprotein OS=Homo sapiens GN=VASP PE=1 SV=3	40 kDa	0.0316	1	1	0.0316	1	1	0.0316	1	1	0	0	0	0.0658	2	2	0.0658	2	2
1048	SUCA_HUMAN	Succinyl-CoA ligase [ADP/GDP-forming] subunit alpha, mitochondrial OS=Homo sapiens GN=SUCLG1 PE=1 SV=4	36 kDa	0	0	0	0.0462	1	1	0.0462	1	1	0.0896	2	2	0.0896	2	2	0.0896	2	2
1049	S10A1_HUMAN	Protein S100-A1 OS=Homo sapiens GN=S100A1 PE=1 SV=2	11 kDa	0.16	1	1	0.234	1	1	0.234	2	2	0.234	2	2	0.234	1	1	0.234	1	1
1050	STRAP_HUMAN	Serine-threonine kinase receptor-associated protein OS=Homo sapiens GN=STRAP PE=1 SV=1	38 kDa	0.0714	2	2	0.0886	2	2	0.0886	2	2	0	0	0	0	0	0	0.0457	1	1
1051	RM15_HUMAN	39S ribosomal protein L15, mitochondrial OS=Homo sapiens GN=MRPL15 PE=1 SV=1	33 kDa	0.0878	2	2	0.0541	1	1	0.0541	1	1	0	0	0	0	0	0	0	0	0
1052	NDUBA_HUMAN	NADH dehydrogenase [ubiquinone] 1 beta subcomplex subunit 10 OS=Homo sapiens GN=NDUFB10 PE=1 SV=3	21 kDa	0.169	2	2	0.0814	1	1	0.0814	1	1	0.169	2	2	0.0814	1	1	0.0814	1	1
1053	TFAM_HUMAN	Transcription factor A, mitochondrial OS=Homo sapiens GN=TFAM PE=1 SV=1	29 kDa	0	0	0	0	0	0	0	0	0	0.11	2	2	0.11	2	2	0.0935	2	2
1054	ATOX1_HUMAN	Copper transport protein ATOX1 OS=Homo sapiens GN=ATOX1 PE=1 SV=1	7 kDa	0.397	2	2	0.265	1	1	0.397	2	2	0	0	0	0	0	0	0	0	0
1055	DCTN1_HUMAN	Dynactin subunit 1 OS=Homo sapiens GN=DCTN1 PE=1 SV=3	142 kDa	0.0219	2	2	0.011	1	1	0.011	1	1	0	0	0	0	0	0	0	0	0
1056	PNKD_HUMAN	Probable hydrolase PNKD OS=Homo sapiens GN=PNKD PE=1 SV=2	43 kDa	0.0675	1	1	0.0675	1	1	0.0675	1	1	0.0675	1	1	0.0675	1	1	0.0909	2	2
1057	LUC7L_HUMAN	Putative RNA-binding protein Luc7-like 1 OS=Homo sapiens GN=LUC7L PE=1 SV=1	44 kDa	0.0701	2	1	0.0889	2	1	0.0701	2	1	0	0	0	0	0	0	0.0458	1	0
1058	PWP2_HUMAN	Periodic tryptophan protein 2 homolog OS=Homo sapiens GN=PWP2 PE=1 SV=2	102 kDa	0.037	2	2	0	0	0	0	0	0	0.0511	3	3	0	0	0	0.037	2	2
1059	ZO2_HUMAN	Tight junction protein ZO-2 OS=Homo sapiens GN=TJP2 PE=1 SV=2	134 kDa	0.0429	3	3	0.0277	2	2	0.0294	2	2	0	0	0	0	0	0	0	0	0
1060	ZYX_HUMAN	Zyxin OS=Homo sapiens GN=ZYX PE=1 SV=1	61 kDa	0.028	1	1	0.028	1	1	0.0647	2	2	0	0	0	0.0332	1	1	0.0909	3	3
1061	HNRL2_HUMAN	Heterogeneous nuclear ribonucleoprotein U-like protein 2 OS=Homo sapiens GN=HNRNPUL2 PE=1 SV=1	85 kDa	0.0174	1	1	0.0415	1	1	0.0482	3	3	0	0	0	0.0174	1	1	0.0174	1	1
1062	RIR1_HUMAN	Ribonucleoside-diphosphate reductase large subunit OS=Homo sapiens GN=RRM1 PE=1 SV=1	90 kDa	0.0543	3	3	0.0328	2	2	0.0417	2	2	0	0	0	0	0	0	0	0	0
1063	SC23B_HUMAN	Protein transport protein Sec23B OS=Homo sapiens GN=SEC23B PE=1 SV=2	86 kDa	0.073	4	2	0.0561	3	1	0.073	4	2	0.0456	3	2	0.0183	1	0	0.0508	3	1
1064	CPSF5_HUMAN	Cleavage and polyadenylation specificity factor subunit 5 OS=Homo sapiens GN=NUDT21 PE=1 SV=1	26 kDa	0.101	2	2	0.0661	1	1	0.101	2	2	0.0793	1	1	0.132	2	2	0	0	0
1065	API5_HUMAN	Apoptosis inhibitor 5 OS=Homo sapiens GN=API5 PE=1 SV=3	59 kDa	0.0553	2	2	0.0248	1	1	0.0553	2	2	0.021	1	1	0.021	1	1	0	0	0
1066	MOT1_HUMAN	Monocarboxylate transporter 1 OS=Homo sapiens GN=SLC16A1 PE=1 SV=3	54 kDa	0	0	0	0	0	0	0.042	2	2	0.042	2	2	0.04	1	1	0.04	1	1
1067	CAZA2_HUMAN	F-actin-capping protein subunit alpha-2 OS=Homo sapiens GN=CAPZA2 PE=1 SV=3	33 kDa	0.15	3	2	0.0874	2	1	0.15	3	2	0.035	1	0	0.0979	2	1	0.0979	2	1
1068	RM03_HUMAN	39S ribosomal protein L3, mitochondrial OS=Homo sapiens GN=MRPL3 PE=1 SV=1	39 kDa	0.0575	1	1	0	0	0	0.0575	1	1	0.109	2	2	0.0517	1	1	0.0517	1	1
1069	6PGL_HUMAN	6-phosphogluconolactonase OS=Homo sapiens GN=PGLS PE=1 SV=2	28 kDa	0.0465	1	1	0.0465	1	1	0.0465	1	1	0.105	2	2	0.0465	1	1	0.105	2	2
1070	AIFM2_HUMAN	Apoptosis-inducing factor 2 OS=Homo sapiens GN=AIFM2 PE=1 SV=1	41 kDa	0.11	2	2	0.0295	1	1	0.11	2	2	0	0	0	0.0295	1	1	0.0295	1	1
1071	ATX10_HUMAN	Ataxin-10 OS=Homo sapiens GN=ATXN10 PE=1 SV=1	53 kDa	0.0358	1	1	0.0358	1	1	0.0716	2	2	0.0358	1	1	0.0358	1	1	0.0358	1	1
1072	CAPR1_HUMAN	Caprin-1 OS=Homo sapiens GN=CAPRIN1 PE=1 SV=2	78 kDa	0.0423	2	2	0.0423	2	2	0.0254	1	1	0.0254	1	1	0	0	0	0	0	0
1073	G3BP2_HUMAN	Ras GTPase-activating protein-binding protein 2 OS=Homo sapiens GN=G3BP2 PE=1 SV=2	54 kDa	0.0436	2	1	0.0436	2	1	0.0436	2	1	0	0	0	0	0	0	0.0456	2	2
1074	HMOX2_HUMAN	Heme oxygenase 2 OS=Homo sapiens GN=HMOX2 PE=1 SV=2	36 kDa	0.0886	2	2	0.0886	2	2	0.0886	2	2	0	0	0	0	0	0	0	0	0
1075	MYG1_HUMAN	UPF0160 protein MYG1, mitochondrial OS=Homo sapiens GN=C12orf10 PE=1 SV=2	42 kDa	0.0479	1	1	0.0798	2	2	0.0798	2	2	0.0319	1	1	0	0	0	0.0851	2	2
1076	RM49_HUMAN	39S ribosomal protein L49, mitochondrial OS=Homo sapiens GN=MRPL49 PE=1 SV=1	19 kDa	0.0723	1	1	0.0723	1	1	0.157	2	2	0.0723	1	1	0.0723	1	1	0.0723	1	1
1077	RU1C_HUMAN	U1 small nuclear ribonucleoprotein C OS=Homo sapiens GN=SNRPC PE=1 SV=1	17 kDa	0.189	2	2	0.113	1	1	0	0	0	0.113	1	1	0.113	1	1	0.189	2	2
1078	SCRN1_HUMAN	Secernin-1 OS=Homo sapiens GN=SCRN1 PE=1 SV=2	46 kDa	0	0	0	0.0411	1	1	0.0725	2	2	0.0725	2	2	0.0411	1	1	0.0411	1	1
1079	TM9S3_HUMAN	Transmembrane 9 superfamily member 3 OS=Homo sapiens GN=TM9SF3 PE=1 SV=2	68 kDa	0	0	0	0.0357	1	1	0.0357	1	1	0.0357	1	1	0.0526	2	2	0.0526	2	2
1080	GGH_HUMAN	Gamma-glutamyl hydrolase OS=Homo sapiens GN=GGH PE=1 SV=2	36 kDa	0.0409	1	1	0.0723	2	2	0.0409	1	1	0.0692	2	2	0.0786	2	2	0	0	0
1081	OFUT1_HUMAN	GDP-fucose protein O-fucosyltransferase 1 OS=Homo sapiens GN=POFUT1 PE=1 SV=1	44 kDa	0.0644	1	1	0.106	2	2	0.106	2	2	0.0412	1	1	0	0	0	0	0	0
1082	VTA1_HUMAN	Vacuolar protein sorting-associated protein VTA1 homolog OS=Homo sapiens GN=VTA1 PE=1 SV=1	34 kDa	0.0554	1	1	0.121	2	2	0.121	2	2	0	0	0	0	0	0	0.0554	1	1
1083	FARP1_HUMAN	FERM, RhoGEF and pleckstrin domain-containing protein 1 OS=Homo sapiens GN=FARP1 PE=1 SV=1	119 kDa	0.0191	2	2	0.0124	1	1	0	0	0	0.00766	1	1	0.0364	2	2	0.0144	1	1
1084	NDUAD_HUMAN	NADH dehydrogenase [ubiquinone] 1 alpha subcomplex subunit 13 OS=Homo sapiens GN=NDUFA13 PE=1 SV=3	17 kDa	0.0972	1	1	0.0972	1	1	0.0972	1	1	0.0972	1	1	0.0972	1	1	0.167	2	2
1085	LAMP2_HUMAN	Lysosome-associated membrane glycoprotein 2 OS=Homo sapiens GN=LAMP2 PE=1 SV=2	45 kDa	0.0195	1	1	0.0195	1	1	0.0195	1	1	0.0415	2	2	0.0415	2	2	0.0195	1	1
1086	MTX2_HUMAN	Metaxin-2 OS=Homo sapiens GN=MTX2 PE=1 SV=1	30 kDa	0.0837	1	1	0	0	0	0.122	2	2	0.038	1	1	0	0	0	0.038	1	1
1087	SMHD1_HUMAN	Structural maintenance of chromosomes flexible hinge domain-containing protein 1 OS=Homo sapiens GN=SMCHD1 PE=1 SV=2	226 kDa	0.0234	2	2	0.00998	1	1	0.00998	1	1	0.00798	1	1	0.00449	1	1	0	0	0
1088	TOM70_HUMAN	Mitochondrial import receptor subunit TOM70 OS=Homo sapiens GN=TOMM70A PE=1 SV=1	67 kDa	0.0395	1	1	0.0395	1	1	0.0395	1	1	0.0641	2	2	0	0	0	0.0395	1	1
1089	PACN2_HUMAN	Protein kinase C and casein kinase substrate in neurons protein 2 OS=Homo sapiens GN=PACSIN2 PE=1 SV=2	56 kDa	0.0247	1	1	0	0	0	0.0947	3	3	0.0473	1	1	0	0	0	0.0453	2	2
1090	AMPM2_HUMAN	Methionine aminopeptidase 2 OS=Homo sapiens GN=METAP2 PE=1 SV=1	53 kDa	0.0816	2	2	0.134	3	3	0	0	0	0	0	0	0.0523	1	1	0.105	2	2
1091	SNR40_HUMAN	U5 small nuclear ribonucleoprotein 40 kDa protein OS=Homo sapiens GN=SNRNP40 PE=1 SV=1	39 kDa	0.168	2	2	0	0	0	0.168	3	3	0	0	0	0	0	0	0.0784	1	1
1092	BTF3_HUMAN	Transcription factor BTF3 OS=Homo sapiens GN=BTF3 PE=1 SV=1	22 kDa	0.107	1	1	0	0	0	0.112	2	2	0.107	1	1	0	0	0	0	0	0
1093	F136A_HUMAN	Protein FAM136A OS=Homo sapiens GN=FAM136A PE=1 SV=1	16 kDa	0	0	0	0.101	1	1	0.101	1	1	0.232	2	2	0.159	2	2	0.232	2	2
1094	EIF3D_HUMAN	Eukaryotic translation initiation factor 3 subunit D OS=Homo sapiens GN=EIF3D PE=1 SV=1	64 kDa	0.0712	2	2	0	0	0	0.0712	2	2	0	0	0	0.0255	1	1	0	0	0
1095	AP2A2_HUMAN	AP-2 complex subunit alpha-2 OS=Homo sapiens GN=AP2A2 PE=1 SV=2	104 kDa	0.0181	1	1	0.0362	2	2	0.0554	3	2	0.0298	2	2	0.0181	1	1	0	0	0
1096	CD2AP_HUMAN	CD2-associated protein OS=Homo sapiens GN=CD2AP PE=1 SV=1	71 kDa	0.036	1	1	0.0423	2	2	0.0563	2	2	0	0	0	0	0	0	0	0	0
1097	ASNA_HUMAN	ATPase ASNA1 OS=Homo sapiens GN=ASNA1 PE=1 SV=2	39 kDa	0	0	0	0.0603	1	1	0.106	2	2	0.106	2	2	0.0603	1	1	0	0	0
1098	BZW2_HUMAN	Basic leucine zipper and W2 domain-containing protein 2 OS=Homo sapiens GN=BZW2 PE=1 SV=1	48 kDa	0.0859	2	2	0.0406	1	1	0.0859	2	2	0	0	0	0	0	0	0	0	0
1099	CS043_HUMAN	Uncharacterized protein C19orf43 OS=Homo sapiens GN=C19orf43 PE=1 SV=1	18 kDa	0.153	2	2	0.153	2	2	0.153	2	2	0	0	0	0	0	0	0.148	1	1
1100	CSN3_HUMAN	COP9 signalosome complex subunit 3 OS=Homo sapiens GN=COPS3 PE=1 SV=3	48 kDa	0.0473	1	1	0.0473	1	1	0.106	2	2	0.0473	1	1	0.0473	1	1	0.0473	1	1
1101	DPEP1_HUMAN	Dipeptidase 1 OS=Homo sapiens GN=DPEP1 PE=1 SV=3	46 kDa	0	0	0	0.0998	2	2	0.0511	1	1	0.0998	2	2	0.0998	2	2	0.0998	2	2
1102	EMC1_HUMAN	ER membrane protein complex subunit 1 OS=Homo sapiens GN=EMC1 PE=1 SV=1	112 kDa	0.0383	2	2	0	0	0	0.0383	2	2	0.0181	1	1	0	0	0	0	0	0
1103	EPIPL_HUMAN	Epiplakin OS=Homo sapiens GN=EPPK1 PE=1 SV=2	556 kDa	0.00373	1	0	0	0	0	0.00825	2	2	0.00354	1	1	0	0	0	0.00727	2	1
1104	FA98A_HUMAN	Protein FAM98A OS=Homo sapiens GN=FAM98A PE=1 SV=1	55 kDa	0.0655	2	2	0.0231	1	1	0.0655	2	2	0.0231	1	1	0	0	0	0.0231	1	1
1105	UTRO_HUMAN	Utrophin OS=Homo sapiens GN=UTRN PE=1 SV=2	394 kDa	0	0	0	0	0	0	0.00466	1	1	0	0	0	0.00553	1	1	0.0111	3	3
1106	DAG1_HUMAN	Dystroglycan OS=Homo sapiens GN=DAG1 PE=1 SV=2	97 kDa	0.0369	2	2	0.0168	1	1	0.0369	2	2	0	0	0	0	0	0	0	0	0
1107	SF3B5_HUMAN	Splicing factor 3B subunit 5 OS=Homo sapiens GN=SF3B5 PE=1 SV=1	10 kDa	0.256	2	2	0	0	0	0.151	1	1	0	0	0	0.105	1	1	0	0	0
1108	BYST_HUMAN	Bystin OS=Homo sapiens GN=BYSL PE=1 SV=3	50 kDa	0.0458	1	1	0.0641	2	2	0.0641	2	2	0.0641	2	2	0	0	0	0	0	0
1109	PSMD5_HUMAN	26S proteasome non-ATPase regulatory subunit 5 OS=Homo sapiens GN=PSMD5 PE=1 SV=3	56 kDa	0.0298	1	1	0.0298	1	1	0.0298	1	1	0.0556	2	2	0	0	0	0.0298	1	1
1110	NOC2L_HUMAN	Nucleolar complex protein 2 homolog OS=Homo sapiens GN=NOC2L PE=1 SV=4	85 kDa	0.012	1	1	0.0187	1	1	0.0187	1	1	0.0187	1	1	0.032	2	2	0.0134	1	1
1111	MRP2_HUMAN	Canalicular multispecific organic anion transporter 1 OS=Homo sapiens GN=ABCC2 PE=1 SV=3	174 kDa	0.0104	1	1	0.0104	1	1	0.0168	2	2	0.0104	1	1	0.0104	1	1	0.0104	1	1
1112.1	UBQL2_HUMAN	Ubiquilin-2 OS=Homo sapiens GN=UBQLN2 PE=1 SV=2	66 kDa	0.0673	2	1	0.0433	1	1	0.0673	2	1	0	0	0	0	0	0	0	0	0
1112.2	UBQL1_HUMAN	Ubiquilin-1 OS=Homo sapiens GN=UBQLN1 PE=1 SV=2	63 kDa	0.0526	2	0	0.0255	1	1	0.0255	1	0	0	0	0	0	0	0	0	0	0
1112.3	UBQL4_HUMAN	Ubiquilin-4 OS=Homo sapiens GN=UBQLN4 PE=1 SV=2	64 kDa	0	0	0	0	0	0	0	0	0	0	0	0	0	0	0	0	0	0
1113	GAMT_HUMAN	Guanidinoacetate N-methyltransferase OS=Homo sapiens GN=GAMT PE=1 SV=1	26 kDa	0.237	3	3	0.0593	1	1	0.0593	1	1	0.0975	2	2	0	0	0	0.0593	1	1
1114	IMA4_HUMAN	Importin subunit alpha-4 OS=Homo sapiens GN=KPNA4 PE=1 SV=1	58 kDa	0	0	0	0	0	0	0.111	3	3	0.025	1	1	0	0	0	0	0	0
1115	ILK_HUMAN	Integrin-linked protein kinase OS=Homo sapiens GN=ILK PE=1 SV=2	51 kDa	0.031	1	1	0.0752	2	2	0.133	3	3	0	0	0	0	0	0	0	0	0
1116	SFXN1_HUMAN	Sideroflexin-1 OS=Homo sapiens GN=SFXN1 PE=1 SV=4	36 kDa	0.0466	1	1	0	0	0	0	0	0	0	0	0	0.0248	1	1	0.106	3	3
1117	ACSL5_HUMAN	Long-chain-fatty-acid--CoA ligase 5 OS=Homo sapiens GN=ACSL5 PE=1 SV=1	76 kDa	0	0	0	0	0	0	0.0688	2	2	0.0293	1	1	0.0293	1	1	0.0293	1	1
1118	ANM5_HUMAN	Protein arginine N-methyltransferase 5 OS=Homo sapiens GN=PRMT5 PE=1 SV=4	73 kDa	0.0267	1	1	0.022	1	1	0.0267	1	1	0.022	1	1	0.0487	2	2	0.022	1	1
1119	CADM1_HUMAN	Cell adhesion molecule 1 OS=Homo sapiens GN=CADM1 PE=1 SV=2	49 kDa	0.115	2	2	0.115	2	2	0.115	2	2	0	0	0	0	0	0	0	0	0
1120	LAD1_HUMAN	Ladinin-1 OS=Homo sapiens GN=LAD1 PE=1 SV=2	57 kDa	0.0677	2	2	0.0329	1	1	0.0503	2	2	0.0232	1	1	0.0213	1	1	0	0	0
1121	LICH_HUMAN	Lysosomal acid lipase/cholesteryl ester hydrolase OS=Homo sapiens GN=LIPA PE=1 SV=2	45 kDa	0.103	2	2	0.103	2	2	0.103	2	2	0	0	0	0	0	0	0	0	0
1122	LIMA1_HUMAN	LIM domain and actin-binding protein 1 OS=Homo sapiens GN=LIMA1 PE=1 SV=1	85 kDa	0.0224	1	1	0.0448	2	2	0.0461	2	2	0.0224	1	1	0	0	0	0	0	0
1123	ODO1_HUMAN	2-oxoglutarate dehydrogenase, mitochondrial OS=Homo sapiens GN=OGDH PE=1 SV=3	116 kDa	0	0	0	0.0137	1	1	0.0117	1	1	0.0283	2	2	0.0254	2	2	0.0254	2	2
1124	PNPH_HUMAN	Purine nucleoside phosphorylase OS=Homo sapiens GN=PNP PE=1 SV=2	32 kDa	0.114	2	2	0.121	2	2	0.0727	1	1	0.0519	1	1	0.0519	1	1	0.0484	1	1
1125	RM13_HUMAN	39S ribosomal protein L13, mitochondrial OS=Homo sapiens GN=MRPL13 PE=1 SV=1	21 kDa	0.0843	1	1	0	0	0	0	0	0	0.073	1	1	0.073	1	1	0.157	2	2
1126	SNP23_HUMAN	Synaptosomal-associated protein 23 OS=Homo sapiens GN=SNAP23 PE=1 SV=1	23 kDa	0.133	2	2	0.133	2	2	0.133	2	2	0	0	0	0.0664	1	1	0	0	0
1127	TMED5_HUMAN	Transmembrane emp24 domain-containing protein 5 OS=Homo sapiens GN=TMED5 PE=1 SV=1	26 kDa	0.0524	1	1	0.0524	1	1	0.0524	1	1	0.1	2	2	0.0524	1	1	0.0524	1	1
1128	CSN2_HUMAN	COP9 signalosome complex subunit 2 OS=Homo sapiens GN=COPS2 PE=1 SV=1	52 kDa	0.0293	1	1	0	0	0	0	0	0	0.0384	1	1	0.0609	2	2	0.0384	1	1
1129	CATH_HUMAN	Pro-cathepsin H OS=Homo sapiens GN=CTSH PE=1 SV=4	37 kDa	0.161	2	2	0.0507	1	1	0.161	2	2	0.11	1	1	0	0	0	0	0	0
1130	CISD2_HUMAN	CDGSH iron-sulfur domain-containing protein 2 OS=Homo sapiens GN=CISD2 PE=1 SV=1	15 kDa	0.104	1	1	0	0	0	0	0	0	0.215	2	2	0.215	2	2	0.104	1	1
1131	ARLY_HUMAN	Argininosuccinate lyase OS=Homo sapiens GN=ASL PE=1 SV=4	52 kDa	0.0366	1	1	0.0366	1	1	0.0366	1	1	0.0625	2	2	0	0	0	0.0366	1	1
1132	WDR43_HUMAN	WD repeat-containing protein 43 OS=Homo sapiens GN=WDR43 PE=1 SV=3	75 kDa	0.0384	1	1	0.0355	1	1	0.0739	2	2	0	0	0	0	0	0	0	0	0
1133	RER1_HUMAN	Protein RER1 OS=Homo sapiens GN=RER1 PE=1 SV=1	23 kDa	0	0	0	0.051	1	1	0.051	1	1	0.051	1	1	0.051	1	1	0.148	2	2
1134	PDIA5_HUMAN	Protein disulfide-isomerase A5 OS=Homo sapiens GN=PDIA5 PE=1 SV=1	60 kDa	0.0655	2	2	0.0193	1	1	0	0	0	0.0193	1	1	0.0424	2	2	0.0193	1	1
1135	GALE_HUMAN	UDP-glucose 4-epimerase OS=Homo sapiens GN=GALE PE=1 SV=2	38 kDa	0.092	2	2	0.0603	1	1	0.0603	1	1	0	0	0	0	0	0	0.0891	2	2
1136	SSRA_HUMAN	Translocon-associated protein subunit alpha OS=Homo sapiens GN=SSR1 PE=1 SV=3	32 kDa	0.0385	1	1	0.0664	2	2	0.0664	2	2	0	0	0	0.0385	1	1	0.0804	2	2
1137	HN1L_HUMAN	Hematological and neurological expressed 1-like protein OS=Homo sapiens GN=HN1L PE=1 SV=1	20 kDa	0.226	2	2	0.226	2	2	0.142	1	1	0	0	0	0	0	0	0.142	1	1
1138	NADC_HUMAN	Nicotinate-nucleotide pyrophosphorylase [carboxylating] OS=Homo sapiens GN=QPRT PE=1 SV=3	31 kDa	0.0909	2	2	0.0774	2	2	0	0	0	0	0	0	0	0	0	0.037	1	1
1139	EPN4_HUMAN	Clathrin interactor 1 OS=Homo sapiens GN=CLINT1 PE=1 SV=1	68 kDa	0.0224	1	1	0.0224	1	1	0.0224	1	1	0.0224	1	1	0.0224	1	1	0.0496	2	2
1140	PSMD8_HUMAN	26S proteasome non-ATPase regulatory subunit 8 OS=Homo sapiens GN=PSMD8 PE=1 SV=2	40 kDa	0.0286	1	1	0.0457	1	1	0	0	0	0.0457	1	1	0.134	2	2	0.0457	1	1
1141	CHCH3_HUMAN	Coiled-coil-helix-coiled-coil-helix domain-containing protein 3, mitochondrial OS=Homo sapiens GN=CHCHD3 PE=1 SV=1	26 kDa	0.132	2	2	0.0617	1	1	0.0617	1	1	0.0617	1	1	0.0617	1	1	0	0	0
1142	HS74L_HUMAN	Heat shock 70 kDa protein 4L OS=Homo sapiens GN=HSPA4L PE=1 SV=3	95 kDa	0.0167	1	0	0.031	2	1	0.0167	1	0	0.0286	2	1	0.0167	1	0	0.0167	1	0
1143	ATD3B_HUMAN	ATPase family AAA domain-containing protein 3B OS=Homo sapiens GN=ATAD3B PE=1 SV=1	73 kDa	0.0309	2	1	0.0386	2	1	0.0309	2	1	0.0309	2	1	0.0123	1	0	0.0123	1	0
1144	FETA_HUMAN	Alpha-fetoprotein OS=Homo sapiens GN=AFP PE=1 SV=1	69 kDa	0.0591	2	2	0	0	0	0.148	4	4	0	0	0	0	0	0	0	0	0
1145	TIM44_HUMAN	Mitochondrial import inner membrane translocase subunit TIM44 OS=Homo sapiens GN=TIMM44 PE=1 SV=2	51 kDa	0	0	0	0.0354	1	1	0.0354	1	1	0.0619	3	3	0.0332	1	1	0.0265	1	1
1146	NOC3L_HUMAN	Nucleolar complex protein 3 homolog OS=Homo sapiens GN=NOC3L PE=1 SV=1	93 kDa	0	0	0	0.0288	1	1	0.0288	1	1	0.045	2	2	0	0	0	0	0	0
1147	ISOC1_HUMAN	Isochorismatase domain-containing protein 1 OS=Homo sapiens GN=ISOC1 PE=1 SV=3	32 kDa	0.047	1	1	0.047	1	1	0.047	1	1	0.0973	2	2	0.047	1	1	0.047	1	1
1148	NPC2_HUMAN	Epididymal secretory protein E1 OS=Homo sapiens GN=NPC2 PE=1 SV=1	17 kDa	0.258	2	2	0.152	1	1	0.258	2	2	0	0	0	0	0	0	0.106	1	1
1149	NU160_HUMAN	Nuclear pore complex protein Nup160 OS=Homo sapiens GN=NUP160 PE=1 SV=3	162 kDa	0.00905	1	1	0	0	0	0.0167	2	2	0	0	0	0	0	0	0.00905	1	1
1150	PFD2_HUMAN	Prefoldin subunit 2 OS=Homo sapiens GN=PFDN2 PE=1 SV=1	17 kDa	0.0779	1	1	0.0779	1	1	0.169	2	2	0	0	0	0.0779	1	1	0.0779	1	1
1151	PUF60_HUMAN	Poly(U)-binding-splicing factor PUF60 OS=Homo sapiens GN=PUF60 PE=1 SV=1	60 kDa	0.0948	2	2	0.0394	1	1	0.0948	2	2	0	0	0	0	0	0	0.0394	1	1
1152	TES_HUMAN	Testin OS=Homo sapiens GN=TES PE=1 SV=1	48 kDa	0	0	0	0	0	0	0	0	0	0.0451	1	1	0.0451	1	1	0.0855	2	2
1153	VATH_HUMAN	V-type proton ATPase subunit H OS=Homo sapiens GN=ATP6V1H PE=1 SV=1	56 kDa	0	0	0	0.0476	1	1	0	0	0	0.0745	2	2	0.0476	1	1	0.0476	1	1
1154	WDR61_HUMAN	WD repeat-containing protein 61 OS=Homo sapiens GN=WDR61 PE=1 SV=1	34 kDa	0.0426	1	1	0.138	2	2	0	0	0	0.0426	1	1	0	0	0	0.0426	1	1
1155	CHD4_HUMAN	Chromodomain-helicase-DNA-binding protein 4 OS=Homo sapiens GN=CHD4 PE=1 SV=2	218 kDa	0.00837	1	1	0.00575	1	1	0.0262	2	2	0	0	0	0.0126	1	1	0	0	0
1156	DHSB_HUMAN	Succinate dehydrogenase [ubiquinone] iron-sulfur subunit, mitochondrial OS=Homo sapiens GN=SDHB PE=1 SV=3	32 kDa	0.125	2	2	0	0	0	0.075	1	1	0	0	0	0	0	0	0.0893	2	2
1157	ROAA_HUMAN	Heterogeneous nuclear ribonucleoprotein A/B OS=Homo sapiens GN=HNRNPAB PE=1 SV=2	36 kDa	0.0934	3	2	0.0301	1	0	0.0693	2	1	0.0301	1	0	0.0301	1	0	0.0934	3	2
1158	SAM50_HUMAN	Sorting and assembly machinery component 50 homolog OS=Homo sapiens GN=SAMM50 PE=1 SV=3	52 kDa	0	0	0	0	0	0	0	0	0	0.0426	1	1	0.0725	2	2	0.0426	1	1
1159	EMD_HUMAN	Emerin OS=Homo sapiens GN=EMD PE=1 SV=1	29 kDa	0	0	0	0	0	0	0.122	2	2	0.0669	1	1	0.0669	1	1	0.0669	1	1
1160	RT34_HUMAN	28S ribosomal protein S34, mitochondrial OS=Homo sapiens GN=MRPS34 PE=1 SV=2	26 kDa	0.115	2	2	0.0642	1	1	0.115	2	2	0	0	0	0	0	0	0	0	0
1161	PROSC_HUMAN	Proline synthase co-transcribed bacterial homolog protein OS=Homo sapiens GN=PROSC PE=1 SV=1	30 kDa	0.105	2	2	0.105	2	2	0	0	0	0.0473	1	1	0	0	0	0	0	0
1162.1	ERLN2_HUMAN	Erlin-2 OS=Homo sapiens GN=ERLIN2 PE=1 SV=1	38 kDa	0	0	0	0	0	0	0.059	1	1	0.0944	2	1	0.059	1	1	0.0944	2	1
1162.2	ERLN1_HUMAN	Erlin-1 OS=Homo sapiens GN=ERLIN1 PE=1 SV=1	39 kDa	0	0	0	0	0	0	0	0	0	0	0	0	0	0	0	0	0	0
1163	UBC9_HUMAN	SUMO-conjugating enzyme UBC9 OS=Homo sapiens GN=UBE2I PE=1 SV=1	18 kDa	0.285	3	3	0.0823	1	1	0.0823	1	1	0	0	0	0	0	0	0	0	0
1164	AMPB_HUMAN	Aminopeptidase B OS=Homo sapiens GN=RNPEP PE=1 SV=2	73 kDa	0	0	0	0.0385	1	1	0.0938	2	2	0.0615	2	2	0	0	0	0	0	0
1165	MEMO1_HUMAN	Protein MEMO1 OS=Homo sapiens GN=MEMO1 PE=1 SV=1	34 kDa	0.0471	1	1	0.118	2	2	0.118	2	2	0	0	0	0	0	0	0	0	0
1166	NU155_HUMAN	Nuclear pore complex protein Nup155 OS=Homo sapiens GN=NUP155 PE=1 SV=1	155 kDa	0	0	0	0	0	0	0.0453	3	3	0.0158	1	1	0	0	0	0.0151	1	1
1167	GALK1_HUMAN	Galactokinase OS=Homo sapiens GN=GALK1 PE=1 SV=1	42 kDa	0.0306	1	1	0	0	0	0.0791	2	2	0	0	0	0.0765	2	2	0	0	0
1168	WDR75_HUMAN	WD repeat-containing protein 75 OS=Homo sapiens GN=WDR75 PE=1 SV=1	95 kDa	0	0	0	0	0	0	0	0	0	0.0229	1	1	0.0229	1	1	0.0373	2	2
1169	BZW1_HUMAN	Basic leucine zipper and W2 domain-containing protein 1 OS=Homo sapiens GN=BZW1 PE=1 SV=1	48 kDa	0	0	0	0.0263	1	1	0	0	0	0.0549	2	2	0.031	1	1	0	0	0
1170	CCD58_HUMAN	Coiled-coil domain-containing protein 58 OS=Homo sapiens GN=CCDC58 PE=1 SV=1	17 kDa	0.118	1	1	0.181	2	2	0.118	1	1	0	0	0	0.0625	1	1	0	0	0
1171	DNJA3_HUMAN	DnaJ homolog subfamily A member 3, mitochondrial OS=Homo sapiens GN=DNAJA3 PE=1 SV=2	52 kDa	0.0354	1	1	0.0354	1	1	0.0354	1	1	0.0833	2	2	0	0	0	0.0354	1	1
1172	ITPR3_HUMAN	Inositol 1,4,5-trisphosphate receptor type 3 OS=Homo sapiens GN=ITPR3 PE=1 SV=2	304 kDa	0.00749	1	1	0	0	0	0.0168	2	2	0.00936	1	1	0.00412	1	0	0	0	0
1173	LYPA1_HUMAN	Acyl-protein thioesterase 1 OS=Homo sapiens GN=LYPLA1 PE=1 SV=1	25 kDa	0.0609	1	1	0	0	0	0.0609	1	1	0.113	1	1	0	0	0	0.174	2	2
1174	PTH2_HUMAN	Peptidyl-tRNA hydrolase 2, mitochondrial OS=Homo sapiens GN=PTRH2 PE=1 SV=1	19 kDa	0.212	2	2	0.0838	1	1	0	0	0	0.0838	1	1	0	0	0	0.0782	1	1
1175	RNZ2_HUMAN	Zinc phosphodiesterase ELAC protein 2 OS=Homo sapiens GN=ELAC2 PE=1 SV=2	92 kDa	0.0484	2	2	0.0254	1	1	0.046	2	2	0.0254	1	1	0	0	0	0	0	0
1176	UBP2L_HUMAN	Ubiquitin-associated protein 2-like OS=Homo sapiens GN=UBAP2L PE=1 SV=2	115 kDa	0.0221	1	1	0.0221	1	1	0.0304	2	2	0	0	0	0	0	0	0	0	0
1177	ZC3HF_HUMAN	Zinc finger CCCH domain-containing protein 15 OS=Homo sapiens GN=ZC3H15 PE=1 SV=1	49 kDa	0	0	0	0.0869	2	2	0.0399	1	1	0	0	0	0	0	0	0.0399	1	1
1178	HNRLL_HUMAN	Heterogeneous nuclear ribonucleoprotein L-like OS=Homo sapiens GN=HNRPLL PE=1 SV=1	60 kDa	0.0295	1	1	0	0	0	0.0295	1	1	0.0775	2	2	0.0295	1	1	0	0	0
1179	41_HUMAN	Protein 4.1 OS=Homo sapiens GN=EPB41 PE=1 SV=4	97 kDa	0.0382	2	2	0.0174	1	1	0.0174	1	1	0	0	0	0	0	0	0	0	0
1180	CMBL_HUMAN	Carboxymethylenebutenolidase homolog OS=Homo sapiens GN=CMBL PE=1 SV=1	28 kDa	0	0	0	0.118	2	2	0.0694	1	1	0.049	1	1	0	0	0	0.0694	1	1
1181	MCCB_HUMAN	Methylcrotonoyl-CoA carboxylase beta chain, mitochondrial OS=Homo sapiens GN=MCCC2 PE=1 SV=1	61 kDa	0	0	0	0.0213	1	1	0	0	0	0.0586	2	2	0.0284	1	1	0.0231	1	1
1182	NAA15_HUMAN	N-alpha-acetyltransferase 15, NatA auxiliary subunit OS=Homo sapiens GN=NAA15 PE=1 SV=1	101 kDa	0	0	0	0	0	0	0.0115	1	1	0.0312	2	2	0.0115	1	1	0.0115	1	1
1183	EIF1B_HUMAN (+1)	Eukaryotic translation initiation factor 1b OS=Homo sapiens GN=EIF1B PE=1 SV=2	13 kDa	0.142	1	1	0.142	1	1	0.142	1	1	0.142	1	1	0.283	2	2	0	0	0
1184	S23IP_HUMAN	SEC23-interacting protein OS=Homo sapiens GN=SEC23IP PE=1 SV=1	111 kDa	0.016	1	1	0.024	2	2	0	0	0	0.015	1	1	0	0	0	0.015	1	1
1185	RALB_HUMAN	Ras-related protein Ral-B OS=Homo sapiens GN=RALB PE=1 SV=1	23 kDa	0.131	2	2	0.0777	1	1	0.0777	1	1	0	0	0	0.0777	1	1	0	0	0
1186	BAG3_HUMAN	BAG family molecular chaperone regulator 3 OS=Homo sapiens GN=BAG3 PE=1 SV=3	62 kDa	0.033	1	1	0	0	0	0	0	0	0.0296	1	1	0	0	0	0.0626	2	2
1187	SEPT7_HUMAN	Septin-7 OS=Homo sapiens GN=SEPT7 PE=1 SV=2	51 kDa	0.0732	2	1	0.0206	1	0	0.0732	2	1	0.0732	2	1	0.0206	1	0	0.0732	2	1
1188	CN37_HUMAN	2',3'-cyclic-nucleotide 3'-phosphodiesterase OS=Homo sapiens GN=CNP PE=1 SV=2	48 kDa	0.0546	1	1	0.147	3	3	0.0546	1	1	0	0	0	0	0	0	0	0	0
1189	UBC12_HUMAN	NEDD8-conjugating enzyme Ubc12 OS=Homo sapiens GN=UBE2M PE=1 SV=1	21 kDa	0	0	0	0	0	0	0.0546	1	1	0.0492	1	1	0.0874	1	1	0.208	3	3
1190	GMPPA_HUMAN	Mannose-1-phosphate guanyltransferase alpha OS=Homo sapiens GN=GMPPA PE=1 SV=1	46 kDa	0.0333	1	1	0.0714	2	2	0.0333	1	1	0.0429	1	1	0.0429	1	1	0	0	0
1191	ILVBL_HUMAN	Acetolactate synthase-like protein OS=Homo sapiens GN=ILVBL PE=1 SV=2	68 kDa	0.0538	2	2	0.0269	1	1	0.0269	1	1	0	0	0	0	0	0	0.0269	1	1
1192	NPL4_HUMAN	Nuclear protein localization protein 4 homolog OS=Homo sapiens GN=NPLOC4 PE=1 SV=3	68 kDa	0.0247	1	1	0.0444	2	2	0.0247	1	1	0	0	0	0.0296	1	1	0	0	0
1193	PRP4B_HUMAN	Serine/threonine-protein kinase PRP4 homolog OS=Homo sapiens GN=PRPF4B PE=1 SV=3	117 kDa	0.0288	2	2	0.0149	1	1	0.0139	1	1	0	0	0	0.0139	1	1	0	0	0
1194	ENTP5_HUMAN	Ectonucleoside triphosphate diphosphohydrolase 5 OS=Homo sapiens GN=ENTPD5 PE=1 SV=1	48 kDa	0.0327	1	1	0.107	2	2	0.0654	1	1	0	0	0	0.107	2	2	0	0	0
1195	SCO1_HUMAN	Protein SCO1 homolog, mitochondrial OS=Homo sapiens GN=SCO1 PE=1 SV=1	34 kDa	0.0664	1	1	0	0	0	0.12	2	2	0	0	0	0	0	0	0	0	0
1196	SUGT1_HUMAN	Suppressor of G2 allele of SKP1 homolog OS=Homo sapiens GN=SUGT1 PE=1 SV=3	41 kDa	0.0356	1	1	0.0411	1	1	0.104	2	2	0.0411	1	1	0.0411	1	1	0	0	0
1197	C560_HUMAN	Succinate dehydrogenase cytochrome b560 subunit, mitochondrial OS=Homo sapiens GN=SDHC PE=1 SV=1	19 kDa	0	0	0	0	0	0	0	0	0	0.124	2	2	0.0769	1	1	0.0473	1	1
1198	ECE1_HUMAN	Endothelin-converting enzyme 1 OS=Homo sapiens GN=ECE1 PE=1 SV=2	87 kDa	0.0234	1	1	0.0234	1	1	0.0364	2	2	0	0	0	0	0	0	0	0	0
1199	PURA2_HUMAN	Adenylosuccinate synthetase isozyme 2 OS=Homo sapiens GN=ADSS PE=1 SV=3	50 kDa	0.0351	1	1	0.0351	1	1	0.0241	1	1	0.0548	2	2	0	0	0	0	0	0
1200	OSBP1_HUMAN	Oxysterol-binding protein 1 OS=Homo sapiens GN=OSBP PE=1 SV=1	89 kDa	0.0198	1	1	0.0347	2	2	0	0	0	0	0	0	0	0	0	0	0	0
1201	PDC6I_HUMAN	Programmed cell death 6-interacting protein OS=Homo sapiens GN=PDCD6IP PE=1 SV=1	96 kDa	0.0184	1	1	0	0	0	0.0311	2	2	0.0276	1	1	0	0	0	0	0	0
1202	PDS5A_HUMAN	Sister chromatid cohesion protein PDS5 homolog A OS=Homo sapiens GN=PDS5A PE=1 SV=1	151 kDa	0.0127	1	1	0.0127	1	1	0.0307	2	2	0	0	0	0	0	0	0	0	0
1203	GNL3_HUMAN	Guanine nucleotide-binding protein-like 3 OS=Homo sapiens GN=GNL3 PE=1 SV=2	62 kDa	0	0	0	0	0	0	0	0	0	0.0765	2	2	0.0437	1	1	0.0437	1	1
1204	SSDH_HUMAN	Succinate-semialdehyde dehydrogenase, mitochondrial OS=Homo sapiens GN=ALDH5A1 PE=1 SV=2	57 kDa	0	0	0	0	0	0	0	0	0	0.0187	1	1	0.0187	1	1	0.0393	2	2
1205	CSK2B_HUMAN	Casein kinase II subunit beta OS=Homo sapiens GN=CSNK2B PE=1 SV=1	25 kDa	0	0	0	0.0372	1	1	0.144	2	2	0.0419	1	1	0.0651	1	1	0	0	0
1206	PHP14_HUMAN	14 kDa phosphohistidine phosphatase OS=Homo sapiens GN=PHPT1 PE=1 SV=1	14 kDa	0.168	1	1	0.256	2	2	0.168	1	1	0	0	0	0	0	0	0.168	1	1
1207	DHC24_HUMAN	Delta(24)-sterol reductase OS=Homo sapiens GN=DHCR24 PE=1 SV=2	60 kDa	0.031	1	1	0.031	1	1	0.031	1	1	0.0484	2	2	0	0	0	0.0174	1	1
1208	BMS1_HUMAN	Ribosome biogenesis protein BMS1 homolog OS=Homo sapiens GN=BMS1 PE=1 SV=1	146 kDa	0.00936	1	1	0	0	0	0.0226	2	2	0.0195	2	2	0	0	0	0	0	0
1209	SCRB1_HUMAN	Scavenger receptor class B member 1 OS=Homo sapiens GN=SCARB1 PE=1 SV=1	61 kDa	0.0417	2	2	0	0	0	0.0217	1	1	0	0	0	0	0	0	0	0	0
1210	METK1_HUMAN	S-adenosylmethionine synthase isoform type-1 OS=Homo sapiens GN=MAT1A PE=1 SV=2	44 kDa	0.0582	2	1	0.0582	2	1	0.0582	2	1	0.0278	1	0	0.0506	2	1	0.0278	1	0
1211.1	AP3M1_HUMAN	AP-3 complex subunit mu-1 OS=Homo sapiens GN=AP3M1 PE=1 SV=1	47 kDa	0	0	0	0.0287	1	1	0.0789	2	1	0	0	0	0.0239	1	0	0	0	0
1211.2	AP3M2_HUMAN	AP-3 complex subunit mu-2 OS=Homo sapiens GN=AP3M2 PE=1 SV=1	47 kDa	0	0	0	0	0	0	0.0239	1	0	0	0	0	0	0	0	0	0	0
1212	AP3B1_HUMAN	AP-3 complex subunit beta-1 OS=Homo sapiens GN=AP3B1 PE=1 SV=3	121 kDa	0	0	0	0	0	0	0	0	0	0.0192	2	2	0.0366	3	3	0	0	0
1213	UD2A3_HUMAN	UDP-glucuronosyltransferase 2A3 OS=Homo sapiens GN=UGT2A3 PE=2 SV=2	60 kDa	0.0626	2	2	0.0342	1	1	0.0892	3	3	0	0	0	0	0	0	0	0	0
1214	AP2A1_HUMAN	AP-2 complex subunit alpha-1 OS=Homo sapiens GN=AP2A1 PE=1 SV=3	108 kDa	0	0	0	0.0113	1	1	0.0409	3	2	0	0	0	0	0	0	0	0	0
1215	EIF3J_HUMAN	Eukaryotic translation initiation factor 3 subunit J OS=Homo sapiens GN=EIF3J PE=1 SV=2	29 kDa	0.0504	1	1	0	0	0	0.0504	1	1	0.0465	1	1	0.0969	2	2	0	0	0
1216	PICAL_HUMAN	Phosphatidylinositol-binding clathrin assembly protein OS=Homo sapiens GN=PICALM PE=1 SV=2	71 kDa	0.0491	2	2	0.0307	1	1	0.0184	1	1	0	0	0	0	0	0	0.023	1	1
1217	VINEX_HUMAN	Vinexin OS=Homo sapiens GN=SORBS3 PE=1 SV=2	75 kDa	0.0358	1	1	0.0566	2	2	0.0358	1	1	0	0	0	0	0	0	0	0	0
1218	GLPK3_HUMAN (+1)	Putative glycerol kinase 3 OS=Homo sapiens GN=GK3P PE=5 SV=2	61 kDa	0	0	0	0	0	0	0.0235	1	1	0.0235	1	1	0.047	2	2	0.0235	1	1
1219	EIF2A_HUMAN	Eukaryotic translation initiation factor 2A OS=Homo sapiens GN=EIF2A PE=1 SV=3	65 kDa	0.0427	2	2	0.0376	1	1	0.0547	2	2	0	0	0	0	0	0	0	0	0
1220	PLOD1_HUMAN	Procollagen-lysine,2-oxoglutarate 5-dioxygenase 1 OS=Homo sapiens GN=PLOD1 PE=1 SV=2	84 kDa	0.0399	2	2	0.0206	1	1	0.0206	1	1	0	0	0	0	0	0	0	0	0
1221	ZN326_HUMAN	DBIRD complex subunit ZNF326 OS=Homo sapiens GN=ZNF326 PE=1 SV=2	66 kDa	0	0	0	0	0	0	0.043	2	2	0.043	2	2	0	0	0	0.0275	1	1
1222	VPS29_HUMAN	Vacuolar protein sorting-associated protein 29 OS=Homo sapiens GN=VPS29 PE=1 SV=1	21 kDa	0	0	0	0.0714	1	1	0.0549	1	1	0.0549	1	1	0	0	0	0.126	2	2
1223	HEXB_HUMAN	Beta-hexosaminidase subunit beta OS=Homo sapiens GN=HEXB PE=1 SV=3	63 kDa	0.0522	2	2	0.0522	2	2	0.0144	1	1	0.0378	1	1	0	0	0	0	0	0
1224	NCBP1_HUMAN	Nuclear cap-binding protein subunit 1 OS=Homo sapiens GN=NCBP1 PE=1 SV=1	92 kDa	0.0177	1	1	0	0	0	0	0	0	0.043	2	2	0	0	0	0	0	0
1225	CBS_HUMAN	Cystathionine beta-synthase OS=Homo sapiens GN=CBS PE=1 SV=2	61 kDa	0	0	0	0	0	0	0	0	0	0.0472	1	1	0	0	0	0.0744	2	2
1226	ACSL3_HUMAN	Long-chain-fatty-acid--CoA ligase 3 OS=Homo sapiens GN=ACSL3 PE=1 SV=3	80 kDa	0.025	1	0	0.0625	2	1	0.025	1	0	0.0389	2	1	0.0458	2	1	0.0486	2	1
1227	RAGP1_HUMAN	Ran GTPase-activating protein 1 OS=Homo sapiens GN=RANGAP1 PE=1 SV=1	64 kDa	0.063	3	3	0	0	0	0	0	0	0	0	0	0	0	0	0.0153	1	1
1228	NU153_HUMAN	Nuclear pore complex protein Nup153 OS=Homo sapiens GN=NUP153 PE=1 SV=2	154 kDa	0	0	0	0	0	0	0.0481	3	3	0	0	0	0	0	0	0	0	0
1229	PFD5_HUMAN	Prefoldin subunit 5 OS=Homo sapiens GN=PFDN5 PE=1 SV=2	17 kDa	0.0974	1	1	0.214	2	2	0	0	0	0	0	0	0	0	0	0	0	0
1230	PREB_HUMAN	Prolactin regulatory element-binding protein OS=Homo sapiens GN=PREB PE=1 SV=2	45 kDa	0.0336	1	1	0.0336	1	1	0.0336	1	1	0.0767	2	2	0	0	0	0	0	0
1231	STXB2_HUMAN	Syntaxin-binding protein 2 OS=Homo sapiens GN=STXBP2 PE=1 SV=2	66 kDa	0.0573	2	2	0.027	1	1	0.0607	2	2	0	0	0	0	0	0	0	0	0
1232	TIM50_HUMAN	Mitochondrial import inner membrane translocase subunit TIM50 OS=Homo sapiens GN=TIMM50 PE=1 SV=2	40 kDa	0.0765	2	2	0	0	0	0.0765	2	2	0	0	0	0	0	0	0	0	0
1233	C1TM_HUMAN	Monofunctional C1-tetrahydrofolate synthase, mitochondrial OS=Homo sapiens GN=MTHFD1L PE=1 SV=1	106 kDa	0	0	0	0	0	0	0	0	0	0.0256	2	2	0.0481	2	2	0	0	0
1234	FAF2_HUMAN	FAS-associated factor 2 OS=Homo sapiens GN=FAF2 PE=1 SV=2	53 kDa	0	0	0	0.0607	1	1	0	0	0	0.101	2	2	0.0607	1	1	0	0	0
1235	PTPA_HUMAN	Serine/threonine-protein phosphatase 2A activator OS=Homo sapiens GN=PPP2R4 PE=1 SV=3	41 kDa	0	0	0	0	0	0	0	0	0	0.0587	2	2	0.0587	2	2	0.0307	1	1
1236	BGAL_HUMAN	Beta-galactosidase OS=Homo sapiens GN=GLB1 PE=1 SV=2	76 kDa	0.0222	1	1	0	0	0	0.0458	2	2	0	0	0	0	0	0	0	0	0
1237	DFNA5_HUMAN	Non-syndromic hearing impairment protein 5 OS=Homo sapiens GN=DFNA5 PE=1 SV=2	55 kDa	0	0	0	0	0	0	0	0	0	0.0726	2	2	0.0726	2	2	0	0	0
1238	NDUB4_HUMAN	NADH dehydrogenase [ubiquinone] 1 beta subcomplex subunit 4 OS=Homo sapiens GN=NDUFB4 PE=1 SV=3	15 kDa	0.0775	1	1	0	0	0	0	0	0	0.171	2	2	0.171	2	2	0	0	0
1239	AKAP1_HUMAN	A-kinase anchor protein 1, mitochondrial OS=Homo sapiens GN=AKAP1 PE=1 SV=1	97 kDa	0	0	0	0.0233	1	1	0.052	2	2	0	0	0	0	0	0	0.0233	1	1
1240	RT07_HUMAN	28S ribosomal protein S7, mitochondrial OS=Homo sapiens GN=MRPS7 PE=1 SV=2	28 kDa	0.124	2	2	0.112	2	2	0	0	0	0	0	0	0	0	0	0	0	0
1241	IF2B2_HUMAN	Insulin-like growth factor 2 mRNA-binding protein 2 OS=Homo sapiens GN=IGF2BP2 PE=1 SV=2	66 kDa	0.0451	2	0	0.0451	2	0	0.0451	2	0	0.107	4	2	0.0484	2	1	0.0484	2	1
1242	CHSP1_HUMAN	Calcium-regulated heat stable protein 1 OS=Homo sapiens GN=CARHSP1 PE=1 SV=2	16 kDa	0	0	0	0	0	0	0	0	0	0.184	2	2	0	0	0	0.109	1	1
1243	GORS2_HUMAN	Golgi reassembly-stacking protein 2 OS=Homo sapiens GN=GORASP2 PE=1 SV=3	47 kDa	0.0642	2	2	0	0	0	0.0288	1	1	0	0	0	0	0	0	0	0	0
1244	SRPK1_HUMAN	SRSF protein kinase 1 OS=Homo sapiens GN=SRPK1 PE=1 SV=2	74 kDa	0.0321	1	1	0	0	0	0.0672	2	2	0	0	0	0	0	0	0	0	0
1245	LSM4_HUMAN	U6 snRNA-associated Sm-like protein LSm4 OS=Homo sapiens GN=LSM4 PE=1 SV=1	15 kDa	0.0863	1	1	0.144	2	2	0	0	0	0	0	0	0	0	0	0	0	0
1246	ACOC_HUMAN	Cytoplasmic aconitate hydratase OS=Homo sapiens GN=ACO1 PE=1 SV=3	98 kDa	0.0214	1	1	0.0247	1	1	0.0461	2	2	0	0	0	0	0	0	0	0	0
1247	MAVS_HUMAN	Mitochondrial antiviral-signaling protein OS=Homo sapiens GN=MAVS PE=1 SV=2	57 kDa	0	0	0	0	0	0	0.0222	1	1	0.0463	2	2	0	0	0	0.0241	1	1
1248	TTC38_HUMAN	Tetratricopeptide repeat protein 38 OS=Homo sapiens GN=TTC38 PE=1 SV=1	53 kDa	0.0426	1	1	0.0426	1	1	0.0618	2	2	0	0	0	0	0	0	0	0	0
1249	YKT6_HUMAN	Synaptobrevin homolog YKT6 OS=Homo sapiens GN=YKT6 PE=1 SV=1	22 kDa	0.177	2	2	0	0	0	0.0657	1	1	0	0	0	0.0556	1	1	0	0	0
1250	RM47_HUMAN	39S ribosomal protein L47, mitochondrial OS=Homo sapiens GN=MRPL47 PE=1 SV=2	29 kDa	0	0	0	0	0	0	0.048	1	1	0.092	2	2	0	0	0	0.048	1	1
1251	RM39_HUMAN	39S ribosomal protein L39, mitochondrial OS=Homo sapiens GN=MRPL39 PE=1 SV=3	39 kDa	0.0917	2	2	0	0	0	0.0562	1	1	0	0	0	0	0	0	0.0562	1	1
1252	NOC4L_HUMAN	Nucleolar complex protein 4 homolog OS=Homo sapiens GN=NOC4L PE=1 SV=1	58 kDa	0.0407	1	1	0	0	0	0	0	0	0	0	0	0	0	0	0.0581	2	2
1253	NU205_HUMAN	Nuclear pore complex protein Nup205 OS=Homo sapiens GN=NUP205 PE=1 SV=3	228 kDa	0.0129	1	1	0	0	0	0.0209	2	2	0.0139	1	1	0	0	0	0	0	0
1254	UFC1_HUMAN	Ubiquitin-fold modifier-conjugating enzyme 1 OS=Homo sapiens GN=UFC1 PE=1 SV=3	19 kDa	0.132	2	2	0	0	0	0.0778	1	1	0	0	0	0	0	0	0	0	0
1255	SRSF9_HUMAN	Serine/arginine-rich splicing factor 9 OS=Homo sapiens GN=SRSF9 PE=1 SV=1	26 kDa	0.095	2	2	0	0	0	0.0498	1	1	0.0452	1	1	0	0	0	0	0	0
1256	BUD31_HUMAN	Protein BUD31 homolog OS=Homo sapiens GN=BUD31 PE=1 SV=2	17 kDa	0	0	0	0	0	0	0	0	0	0.208	2	2	0.0694	1	1	0	0	0
1257	RM28_HUMAN	39S ribosomal protein L28, mitochondrial OS=Homo sapiens GN=MRPL28 PE=1 SV=4	30 kDa	0.0508	1	1	0	0	0	0	0	0	0.0859	2	2	0	0	0	0	0	0
1258	DLRB1_HUMAN	Dynein light chain roadblock-type 1 OS=Homo sapiens GN=DYNLRB1 PE=1 SV=3	11 kDa	0	0	0	0.344	2	2	0	0	0	0	0	0	0	0	0	0	0	0
1259	SCPDL_HUMAN	Saccharopine dehydrogenase-like oxidoreductase OS=Homo sapiens GN=SCCPDH PE=1 SV=1	47 kDa	0	0	0	0	0	0	0.103	2	2	0	0	0	0	0	0	0	0	0
1260	HEAT1_HUMAN	HEAT repeat-containing protein 1 OS=Homo sapiens GN=HEATR1 PE=1 SV=3	242 kDa	0	0	0	0	0	0	0.014	2	2	0	0	0	0	0	0	0.00606	1	1
1261	UBE2K_HUMAN	Ubiquitin-conjugating enzyme E2 K OS=Homo sapiens GN=UBE2K PE=1 SV=3	22 kDa	0.145	2	2	0	0	0	0	0	0	0	0	0	0.06	1	1	0	0	0
1262	HG2A_HUMAN	HLA class II histocompatibility antigen gamma chain OS=Homo sapiens GN=CD74 PE=1 SV=3	34 kDa	0.0473	1	1	0	0	0	0.0574	2	2	0	0	0	0	0	0	0	0	0
1263	KS6A2_HUMAN	Ribosomal protein S6 kinase alpha-2 OS=Homo sapiens GN=RPS6KA2 PE=1 SV=2	83 kDa	0.0368	2	0	0.0368	2	0	0.0368	2	0	0.0368	2	0	0.0218	1	0	0	0	0
1264	PLIN2_HUMAN	Perilipin-2 OS=Homo sapiens GN=PLIN2 PE=1 SV=2	48 kDa	0	0	0	0	0	0	0	0	0	0.11	2	2	0	0	0	0	0	0
1265	TXND9_HUMAN	Thioredoxin domain-containing protein 9 OS=Homo sapiens GN=TXNDC9 PE=1 SV=2	27 kDa	0	0	0	0.0398	1	1	0.142	2	2	0	0	0	0	0	0	0	0	0
1266	PLOD3_HUMAN	Procollagen-lysine,2-oxoglutarate 5-dioxygenase 3 OS=Homo sapiens GN=PLOD3 PE=1 SV=1	85 kDa	0.0434	2	2	0.0203	1	1	0	0	0	0	0	0	0	0	0	0	0	0
1267	PLRG1_HUMAN	Pleiotropic regulator 1 OS=Homo sapiens GN=PLRG1 PE=1 SV=1	57 kDa	0.0467	2	2	0	0	0	0	0	0	0	0	0	0	0	0	0	0	0
1268	LSM7_HUMAN	U6 snRNA-associated Sm-like protein LSm7 OS=Homo sapiens GN=LSM7 PE=1 SV=1	12 kDa	0.0971	2	2	0	0	0	0	0	0	0	0	0	0	0	0	0	0	0
1269	ACPH_HUMAN	Acylamino-acid-releasing enzyme OS=Homo sapiens GN=APEH PE=1 SV=4	81 kDa	0	0	0	0.0383	2	2	0	0	0	0	0	0	0	0	0	0	0	0
1270	TIPRL_HUMAN	TIP41-like protein OS=Homo sapiens GN=TIPRL PE=1 SV=2	31 kDa	0	0	0	0	0	0	0.169	2	2	0	0	0	0	0	0	0	0	0
1271	RBM8A_HUMAN	RNA-binding protein 8A OS=Homo sapiens GN=RBM8A PE=1 SV=1	20 kDa	0	0	0	0	0	0	0	0	0	0.155	2	2	0	0	0	0	0	0
1272	GDE_HUMAN	Glycogen debranching enzyme OS=Homo sapiens GN=AGL PE=1 SV=3	175 kDa	0	0	0	0.0144	2	2	0	0	0	0	0	0	0	0	0	0	0	0
1273	METK2_HUMAN	S-adenosylmethionine synthase isoform type-2 OS=Homo sapiens GN=MAT2A PE=1 SV=1	44 kDa	0.0658	2	1	0.0278	1	0	0.0278	1	0	0.0278	1	0	0.0278	1	0	0.0278	1	0
1274	FBLL1_HUMAN	rRNA/tRNA 2'-O-methyltransferase fibrillarin-like protein 1 OS=Homo sapiens GN=FBLL1 PE=3 SV=1	35 kDa	0.0661	2	0	0	0	0	0.0661	2	0	0	0	0	0	0	0	0	0	0
