# Supplementary material for: The Selection of a Hepatocyte Cell Line Susceptible to Plasmodium falciparum Sporozoite Invasion That Is Associated With Expression of Glypican-3
Source: Front Microbiol. 2019 Feb 28;10:127. doi: 10.3389/fmicb.2019.00127 (PMC6413710; doi:10.3389/fmicb.2019.00127)
Supplement: Supplementary file 4 [file Table_4.XLSX]

## Sheet: TABLE LEGEND
Table S4. Proteins identified in membrane-enriched HC-04, HC-04.J7, and HepG2 grown in IMDM and DMEM-NoGlc (basic) medium.
Numbers displayed in the table are normalized spectral count (NSC) values as exported by Scaffold software.
Legend:
Cell line	Media used [DMEM-NoGLc also referred to as Basic (B) or IMDM (I)]	Biological replicates
HC-04.J7	B	B01
		B02
		B03
	I	B01
		B02
		B03
HC-04	B	B01
		B02
		B03
	I	B01
		B02
		B03
HepG2	B	B01
		B02
		B03
	I	B01
		B02
		B03
Note: HC-04 NAVY or HC-04N is the coded reference to the original HC-04 cell line acquired from the US Naval Medical Research Center

## Sheet: NSC values
			HC-04.J7_Basic			HC-04.J7 basic average	HC-04.J7_IMDM			HC-04.J7 IMDM average	HC-04_Basic			HC-04 basic average	HC-04_IMDM			HC-04 IMDM average	HepG2_Basic			HepG2 basic average	HepG2_IMDM			HepG2 IMDM average
Identified Proteins	Accession Number	Molecular Weight	HC-04.J7_B_B01	HC-04.J7_B_B02	HC-04.J7_B_B03		HC-04.J7_I_B01	HC-04.J7_I_B02	HC-04.J7_I_B03		HC-04_B_B01	HC-04_B_B02	HC-04_B_B03		HC-04_I_B01	HC-04_I_B02	HC-04_I_B03		HepG2_B_B01	HepG2_B_B02	HepG2_B_B03		HepG2_I_B01	HepG2_I_B02	HepG2_I_B03
Actin, alpha cardiac muscle 1 OS=Homo sapiens GN=ACTC1 PE=1 SV=1	ACTC_HUMAN	42 kDa	148.32	85.712	118.91	117.647	68.922	217.69	77.028	121.213	48.443	53.219	79.774	60.4787	23.811	24.748	27.905	25.488	45.401	189.56	127.47	120.81	74.671	246.18	154.2	158.35
Beta-actin-like protein 2 OS=Homo sapiens GN=ACTBL2 PE=1 SV=2	ACTBL_HUMAN	42 kDa	101.04	11.613	11.188	41.2803	54.704	157.49	27.841	80.0117	27.854	20.132	24.989	24.325	16.857	28.118	20.159	21.7113	48.342	46.547	123.79	72.893	45.512	15.92	48.635	36.689
Actin, cytoplasmic 2 OS=Homo sapiens GN=ACTG1 PE=1 SV=1	ACTG_HUMAN	42 kDa	1026	347.71	692.86	688.857	561.3	1045.8	364.48	657.193	1050.3	1290.2	1271.8	1204.1	571.88	930.51	920.77	807.72	659.93	708.05	764.87	710.95	1017.2	614.84	545.17	725.737
POTE ankyrin domain family member E OS=Homo sapiens GN=POTEE PE=1 SV=3	POTEE_HUMAN	121 kDa	609.34	241.02	444.79	431.717	243.05	614.66	166.32	341.343	993.46	1221.9	1053.2	1089.52	497.69	854.42	816.23	722.78	524.84	562.5	613.22	566.853	940.37	596.64	435.01	657.34
Putative beta-actin-like protein 3 OS=Homo sapiens GN=POTEKP PE=5 SV=1	ACTBM_HUMAN	42 kDa	91.405	67.591	74.495	77.8303	12.157	68.581	56.125	45.621	14.894	13.91	6.2079	11.6706	4.0413	4.417	5.8874	4.7819	10.006	115.98	19.166	48.384	35.558	200.71	122.86	119.709
Actin, cytoplasmic 1 OS=Homo sapiens GN=ACTB PE=1 SV=1	ACTB_HUMAN	42 kDa	1026	347.71	692.86	688.857	561.3	1045.8	364.48	657.193	1050.3	1289.9	1271.8	1204	571.88	930.51	920.77	807.72	658.88	707.28	707.16	691.107	1017.2	614.84	513.37	715.137
Histone H4 OS=Homo sapiens GN=HIST1H4A PE=1 SV=2	H4_HUMAN	11 kDa	606.37	287.12	318.23	403.907	383.17	508.55	344.34	412.02	806.13	987.86	796.69	863.56	906.86	868.32	1012.1	929.093	863.2	850.98	795.82	836.667	605.31	486.13	666.38	585.94
ATP synthase subunit beta, mitochondrial OS=Homo sapiens GN=ATP5B PE=1 SV=3	ATPB_HUMAN	57 kDa	156.23	170.47	134.01	153.57	147.73	139.41	164.96	150.7	70.056	151.58	139	120.212	83.339	211.28	210.43	168.35	83.66	83.03	62.565	76.4183	136.13	74.381	97.015	102.509
Myosin-9 OS=Homo sapiens GN=MYH9 PE=1 SV=4	MYH9_HUMAN	227 kDa	75.08	125	98.765	99.615	124.38	140.69	138.54	134.537	74.881	74.282	91.273	80.1453	120.93	96.576	128.47	115.325	47.785	54.118	29.078	43.6603	74.006	80.962	91.458	82.142
Myosin-10 OS=Homo sapiens GN=MYH10 PE=1 SV=3	MYH10_HUMAN	229 kDa	31.113	37.378	28.677	32.3893	39.42	48.548	33.433	40.467	72.791	59.346	77.998	70.045	34.862	47.008	53.25	45.04	26.762	16.364	13.975	19.0337	13.547	25.639	24.778	21.3213
Myosin-11 OS=Homo sapiens GN=MYH11 PE=1 SV=3	MYH11_HUMAN	227 kDa	0	3.4896	3.6161	2.36857	6.243	0	5.3162	3.85307	0	4.0953	4.6269	2.9074	5.0517	5.3635	5.52	5.31173	0	0	0	0	4.8597	4.0725	4.2186	4.3836
Myosin-14 OS=Homo sapiens GN=MYH14 PE=1 SV=2	MYH14_HUMAN	228 kDa	6.3331	2.8015	0	3.04487	10.247	5.6648	4.6796	6.8638	7.2817	2.7302	3.3049	4.43893	3.3678	3.786	6.5722	4.57533	0	0	0.71563	0.238543	5.4232	2.3007	5.0413	4.25507
Spectrin beta chain, non-erythrocytic 1 OS=Homo sapiens GN=SPTBN1 PE=1 SV=2	SPTB2_HUMAN	275 kDa	104.47	134.46	132.22	123.717	113.63	106.17	166.36	128.72	41.815	65.214	65.882	57.637	80.853	62.997	89.65	77.8333	125.09	108.89	107.12	113.7	116.5	149.3	131	132.267
Spectrin beta chain, erythrocytic OS=Homo sapiens GN=SPTB PE=1 SV=5	SPTB1_HUMAN	246 kDa	33.197	45.831	35.227	38.085	41.529	33.819	37.574	37.6407	0	0	0	0	21.563	18.547	0	13.37	54.022	25.842	26.114	35.326	43.942	26.132	35.287	35.1203
Spectrin beta chain, non-erythrocytic 2 OS=Homo sapiens GN=SPTBN2 PE=1 SV=3	SPTN2_HUMAN	271 kDa	3.3862	0	0	1.12873	8.8351	0	0	2.94503	0	0.91949	0.7911	0.570197	0	0	1.8829	0.627633	0	0	0	0	0	0	0	0
Spectrin alpha chain, non-erythrocytic 1 OS=Homo sapiens GN=SPTAN1 PE=1 SV=3	SPTN1_HUMAN	285 kDa	151.02	121.32	154.39	142.243	291.94	327.4	151.21	256.85	72.43	85.543	133.37	97.1143	358.83	263.43	153.5	258.587	231.11	102.97	151.01	161.697	217.1	105	145.58	155.893
Keratin, type II cytoskeletal 8 OS=Homo sapiens GN=KRT8 PE=1 SV=7	K2C8_HUMAN	54 kDa	33.238	41.04	37.004	37.094	47.428	38.539	27.138	37.7017	30.701	20.242	25.441	25.4613	21.852	30.25	30.517	27.5397	92.245	102.48	44.208	79.6443	68.315	44.943	68.509	60.589
Keratin, type II cytoskeletal 1 OS=Homo sapiens GN=KRT1 PE=1 SV=6	K2C1_HUMAN	66 kDa	3.1179	8.2302	5.5476	5.6319	4.8604	2.3537	4.4301	3.8814	10.429	8.6863	5.738	8.28443	3.628	7.9352	8.9417	6.83497	24.992	11.511	6.6914	14.3981	26.694	11.199	20.123	19.3387
Keratin, type II cytoskeletal 2 epidermal OS=Homo sapiens GN=KRT2 PE=1 SV=2	K22E_HUMAN	65 kDa	2.1323	11.391	5.2315	6.2516	5.2755	3.1709	2.9534	3.79993	12.018	11.875	4.0891	9.32737	7.152	5.7141	5.7537	6.2066	29.674	15.599	11.005	18.7593	40.272	5.9633	12.157	19.4641
Keratin, type II cytoskeletal 73 OS=Homo sapiens GN=KRT73 PE=1 SV=1	K2C73_HUMAN	59 kDa	0	0	0	0	0	0	0	0	0	0	0	0	0	0	0	0	0	1.1512	0	0.383733	2.9641	1.8512	0	1.6051
Keratin, type II cytoskeletal 6C OS=Homo sapiens GN=KRT6C PE=1 SV=3	K2C6C_HUMAN	60 kDa	2.0786	0	0	0.692867	0	0	0	0	0	0	0	0	0	0	0	0	2.7642	0	0	0.9214	8.1409	0	0	2.71363
Keratin, type II cytoskeletal 1b OS=Homo sapiens GN=KRT77 PE=2 SV=3	K2C1B_HUMAN	62 kDa	0	0	0	0	0	0	0	0	0	0	0	0	0	0	0	0	0	0	0	0	0	0	1.6288	0.542933
Keratin, type II cytoskeletal 79 OS=Homo sapiens GN=KRT79 PE=1 SV=2	K2C79_HUMAN	58 kDa	0	0	0	0	0	0	0	0	0	0	0	0	0	0	0	0	3.4621	0	0	1.15403	2.4298	0	0	0.809933
Keratin, type II cytoskeletal 74 OS=Homo sapiens GN=KRT74 PE=1 SV=2	K2C74_HUMAN	58 kDa	0	0	0	0	0	0	0	0	0	0	0	0	0	0	0	0	0	0	0	0	0	0	1.6874	0.562467
Keratin, type I cytoskeletal 18 OS=Homo sapiens GN=KRT18 PE=1 SV=2	K1C18_HUMAN	48 kDa	199.33	36.164	27.36	87.618	81.016	108.94	23.823	71.2597	125.34	50.84	41.858	72.6793	75.552	61.595	29.018	55.3883	106.5	156.68	143.14	135.44	272.84	150.31	138.8	187.317
Keratin, type I cytoskeletal 10 OS=Homo sapiens GN=KRT10 PE=1 SV=6	K1C10_HUMAN	59 kDa	2.4787	17.834	5.8562	8.72297	4.3034	6.1418	3.0481	4.49777	10.709	4.4996	2.31	5.83953	1.3672	6.0104	9.8387	5.73877	51.062	20.388	10.201	27.217	48.496	16.189	23.177	29.2873
Keratin, type I cytoskeletal 19 OS=Homo sapiens GN=KRT19 PE=1 SV=4	K1C19_HUMAN	44 kDa	1.7322	2.8551	1.5684	2.0519	1.9442	1.322	1.4767	1.58097	2.4084	0.91949	1.8459	1.7246	1.2093	1.2174	2.1518	1.52617	58.841	39.769	30.622	43.0773	35.88	32.884	44.039	37.601
Keratin, type I cytoskeletal 16 OS=Homo sapiens GN=KRT16 PE=1 SV=4	K1C16_HUMAN	51 kDa	0	0	0	0	0	0.37076	0	0.123587	0	0	0	0	0	4.8871	2.1518	2.3463	7.4187	4.9884	4.2651	5.5574	0	7.084	9.7593	5.61443
Keratin, type I cytoskeletal 17 OS=Homo sapiens GN=KRT17 PE=1 SV=2	K1C17_HUMAN	48 kDa	0	0	0	0	0	0	0	0	0	0	0	0	0	2.1416	1.6139	1.25183	13.5	4.9884	9.4291	9.30583	9.0387	9.0441	10.075	9.38593
Keratin, type I cytoskeletal 15 OS=Homo sapiens GN=KRT15 PE=1 SV=3	K1C15_HUMAN	49 kDa	0	0	0.72614	0.242047	0	0	0	0	0	0	0	0	0	0.631	0	0.210333	0	0	0	0	0	0	0.81439	0.271463
ATP synthase subunit alpha, mitochondrial OS=Homo sapiens GN=ATP5A1 PE=1 SV=1	ATPA_HUMAN	60 kDa	194.3	62.229	86.92	114.483	112.8	140.91	86.743	113.484	230.82	256.73	250.46	246.003	92.555	128.8	298.15	173.168	48.589	48.836	79.628	59.0177	77.631	60.182	56.444	64.7523
Voltage-dependent anion-selective channel protein 1 OS=Homo sapiens GN=VDAC1 PE=1 SV=2	VDAC1_HUMAN	31 kDa	210.96	81.22	307.1	199.76	166.09	171.02	62.746	133.285	348.01	241.35	425.72	338.36	322.91	252	327.22	300.71	218.81	152.85	151.51	174.39	156.38	141.8	190.7	162.96
Trifunctional enzyme subunit alpha, mitochondrial OS=Homo sapiens GN=HADHA PE=1 SV=2	ECHA_HUMAN	83 kDa	74.239	46.413	35.574	52.0753	41.374	49.313	46.103	45.5967	150.51	116.7	126.24	131.15	71.888	98.084	131.62	100.531	28.48	31.713	54.003	38.0653	49.726	34.213	35.171	39.7033
Prelamin-A/C OS=Homo sapiens GN=LMNA PE=1 SV=1	LMNA_HUMAN	74 kDa	36.941	51.549	156.15	81.5467	34.487	42.557	42.701	39.915	40.382	38.183	40.522	39.6957	41.038	44.576	41.04	42.218	48.488	36.19	23.192	35.9567	36.032	29.82	44.695	36.849
Tubulin alpha-1C chain OS=Homo sapiens GN=TUBA1C PE=1 SV=1	TBA1C_HUMAN	50 kDa	25.026	32.153	30.874	29.351	25.086	23.968	22.078	23.7107	66.606	87.451	83.588	79.215	23.721	42.04	24.134	29.965	32.2	36.184	35.956	34.78	20.555	74.568	25.493	40.2053
Tubulin alpha-1B chain OS=Homo sapiens GN=TUBA1B PE=1 SV=1	TBA1B_HUMAN	50 kDa	34.766	34.868	37.047	35.5603	25.41	33.649	23.449	27.5027	103.22	187.78	172.4	154.467	35.056	54.288	46.884	45.4093	34.353	43.966	50.307	42.8753	24.911	82.889	29.756	45.852
Tubulin alpha-3E chain OS=Homo sapiens GN=TUBA3E PE=1 SV=2	TBA3E_HUMAN	50 kDa	27.237	28.27	30.347	28.618	20.459	28.03	18.428	22.3057	97.307	180.25	165.01	147.522	30.487	48.942	41.606	40.345	17.776	30.541	39.182	29.1663	19.576	37.803	23.04	26.8063
Tubulin alpha-8 chain OS=Homo sapiens GN=TUBA8 PE=1 SV=1	TBA8_HUMAN	50 kDa	9.9634	20.194	20.244	16.8005	9.6598	11.775	12.227	11.2206	10.882	17.54	20.768	16.3967	10.685	9.5527	13.635	11.2909	10.873	22.503	17.234	16.87	11.041	58.484	10.398	26.641
Histone H2B type 1-M OS=Homo sapiens GN=HIST1H2BM PE=1 SV=3	H2B1M_HUMAN	14 kDa	312.32	250.82	225.97	263.037	220.89	287.69	296.88	268.487	278.83	164.57	153.9	199.1	261.05	225.87	262.94	249.953	333.82	324.26	318.42	325.5	226.03	190.48	217.03	211.18
Histone H2B type 1-B OS=Homo sapiens GN=HIST1H2BB PE=1 SV=2	H2B1B_HUMAN (+3)	14 kDa	228.55	97.846	187.5	171.299	163.97	233.83	213.42	203.74	182.21	146.64	120.71	149.853	121.03	130.49	178.64	143.387	174.93	148.69	181.85	168.49	142.07	142.44	161.99	148.833
Prohibitin OS=Homo sapiens GN=PHB PE=1 SV=1	PHB_HUMAN	30 kDa	102.76	43.755	21.595	56.0367	85.832	74.591	109.76	90.061	229.65	518.26	334.63	360.847	230.06	189.8	270.49	230.117	45.29	145.65	123.52	104.82	91.637	45.219	88.763	75.2063
Tubulin beta chain OS=Homo sapiens GN=TUBB PE=1 SV=2	TBB5_HUMAN	50 kDa	32.151	29.384	32.474	31.3363	24.695	29.356	27.289	27.1133	27.47	28.085	23.954	26.503	23.234	21.256	24.123	22.871	36.485	44.881	41.595	40.987	24.352	49.727	39.171	37.75
Tubulin beta-2A chain OS=Homo sapiens GN=TUBB2A PE=1 SV=1	TBB2A_HUMAN	50 kDa	21.543	18.962	22.893	21.1327	19.977	25.681	20.712	22.1233	21.818	22.429	18.346	20.8643	19.269	17.92	20.301	19.1633	27.67	36.442	36.742	33.618	20.607	39.654	30.926	30.3957
Tubulin beta-3 chain OS=Homo sapiens GN=TUBB3 PE=1 SV=2	TBB3_HUMAN	50 kDa	19.859	19.297	22.359	20.505	15.588	16.503	19.098	17.063	19.285	22.318	15.569	19.0573	18.794	16.917	16.213	17.308	22.985	34.269	33.916	30.39	19.551	39.178	28.809	29.1793
Tubulin beta-4B chain OS=Homo sapiens GN=TUBB4B PE=1 SV=1	TBB4B_HUMAN	50 kDa	26.281	22.98	27.204	25.4883	23.075	18.039	22.21	21.108	23.964	25.8	19.995	23.253	21.083	18.821	21.915	20.6063	26.128	38.232	33.075	32.4783	23.759	46.732	33.799	34.7633
Tubulin beta-6 chain OS=Homo sapiens GN=TUBB6 PE=1 SV=1	TBB6_HUMAN	50 kDa	6.9288	7.5193	9.4106	7.9529	8.6522	11.697	9.3219	9.89037	8.5456	10.797	6.5925	8.64503	7.5584	6.3912	6.2519	6.73383	8.1464	10.997	9.905	9.6828	5.9282	10.842	8.3775	8.38257
Tubulin beta-4A chain OS=Homo sapiens GN=TUBB4A PE=1 SV=2	TBB4A_HUMAN	50 kDa	23.641	15.355	22.646	20.5473	19.886	15.396	17.432	17.5713	19.741	21.809	15.903	19.151	15.193	15.689	16.076	15.6527	15.915	21.357	15.633	17.635	18.119	29.226	19.653	22.3327
Tubulin beta-1 chain OS=Homo sapiens GN=TUBB1 PE=1 SV=1	TBB1_HUMAN	50 kDa	0	0	0	0	0	0	0	0	2.3785	1.3651	0	1.24787	0	1.893	0	0.631	0	0	0	0	0	0	0	0
Heat shock protein HSP 90-beta OS=Homo sapiens GN=HSP90AB1 PE=1 SV=4	HS90B_HUMAN	83 kDa	89.948	96.633	68.239	84.94	11.357	13.962	39.612	21.6437	14.885	33.344	34.508	27.579	9.3171	8.8133	32.048	16.7261	176.02	178.25	249.23	201.167	32.764	148.11	100.2	93.6913
Heat shock protein HSP 90-alpha OS=Homo sapiens GN=HSP90AA1 PE=1 SV=5	HS90A_HUMAN	85 kDa	17.634	31.158	56.405	35.0657	5.9089	6.3112	8.3988	6.87297	8.7482	29.562	17.694	18.6681	3.4979	4.3277	3.5418	3.78913	21.882	36.917	89.891	49.5633	6.9863	157.22	48.745	70.9838
Putative heat shock protein HSP 90-alpha A5 OS=Homo sapiens GN=HSP90AA5P PE=2 SV=1	HS905_HUMAN	39 kDa	0	0	0	0	0	0	0	0	0	0	0	0	0	0	0	0	0	0	0	0	0	4.2179	0	1.40597
Putative heat shock protein HSP 90-beta-3 OS=Homo sapiens GN=HSP90AB3P PE=5 SV=1	H90B3_HUMAN	68 kDa	5.543	7.2964	7.0013	6.61357	0	0	0	0	5.4189	4.291	5.0103	4.90673	0	0	0	0	9.397	18.54	16.582	14.8397	0	22.92	5.4385	9.45283
Histone H3.1 OS=Homo sapiens GN=HIST1H3A PE=1 SV=2	H31_HUMAN	15 kDa	308.6	249.24	286.06	281.3	282.85	174.92	276	244.59	456.25	206.3	243.85	302.133	586.4	548.84	289.95	475.063	578.76	446.33	627.08	550.723	530.43	421.68	630.62	527.577
Histone H3.2 OS=Homo sapiens GN=HIST2H3A PE=1 SV=3	H32_HUMAN	15 kDa	294.31	230.04	359.47	294.607	282.85	174.92	266.38	241.383	435.75	206.3	243.85	295.3	586.4	546.18	287.96	473.513	550.88	433.66	548.04	510.86	488.97	403.84	531.47	474.76
Histone H3.3 OS=Homo sapiens GN=H3F3A PE=1 SV=2	H33_HUMAN	15 kDa	296.36	230.04	306.47	277.623	282.85	174.92	268.35	242.04	435.75	206.3	243.85	295.3	586.4	546.18	287.96	473.513	548.02	433.66	548.04	509.907	475.82	407.45	519.76	467.677
Histone H3.1t OS=Homo sapiens GN=HIST3H3 PE=1 SV=3	H31T_HUMAN	16 kDa	294.31	230.04	285.7	270.017	282.85	174.92	265.99	241.253	435.75	206.3	243.85	295.3	586.4	546.18	287.96	473.513	548.02	433.66	548.04	509.907	466.6	402.32	519.76	462.893
Cytoskeleton-associated protein 4 OS=Homo sapiens GN=CKAP4 PE=1 SV=2	CKAP4_HUMAN	66 kDa	32.052	28.777	26.934	29.2543	23.495	23.15	26.192	24.279	23.401	32.997	37.594	31.3307	25.649	28.698	45.357	33.2347	51.607	37.979	24.479	38.0217	40.787	34.224	45.345	40.1187
Elongation factor 1-alpha 1 OS=Homo sapiens GN=EEF1A1 PE=1 SV=1	EF1A1_HUMAN	50 kDa	133.19	56.782	119.52	103.164	65.416	23.335	132.6	73.7837	166.26	85.171	121.68	124.37	74.852	96.871	230	133.908	209.46	170.17	143	174.21	439.06	335.33	131.98	302.123
Elongation factor 1-alpha 2 OS=Homo sapiens GN=EEF1A2 PE=1 SV=1	EF1A2_HUMAN	50 kDa	14.652	10.35	43.194	22.732	51.602	9.4073	63.301	41.4368	129.67	69.241	107.31	102.074	60.358	69.073	218.54	115.99	200.41	104.84	69.722	124.991	412.86	64.604	5.4842	160.983
Voltage-dependent anion-selective channel protein 2 OS=Homo sapiens GN=VDAC2 PE=1 SV=2	VDAC2_HUMAN	32 kDa	235.07	39.397	46.73	107.066	95.093	51.706	24.63	57.143	351.96	459.31	334.6	381.957	226.93	184.57	268.13	226.543	112.35	126.32	82.953	107.208	203.56	95.834	176.09	158.495
ADP/ATP translocase 2 OS=Homo sapiens GN=SLC25A5 PE=1 SV=7	ADT2_HUMAN	33 kDa	45.038	15.144	16.858	25.68	129.06	43.39	32.994	68.4813	95.369	56.276	21.329	57.658	23.068	24.845	25.843	24.5853	47.495	24.042	74.477	48.6713	19.14	19.078	18.849	19.0223
ADP/ATP translocase 3 OS=Homo sapiens GN=SLC25A6 PE=1 SV=4	ADT3_HUMAN	33 kDa	40.52	13.212	13.721	22.4843	75.802	38.026	31.171	48.333	90.127	57.968	17.363	55.1527	19.13	21.515	20.677	20.4407	45.272	17.903	71.723	44.966	12.161	16.5	14.629	14.43
ADP/ATP translocase 1 OS=Homo sapiens GN=SLC25A4 PE=1 SV=4	ADT1_HUMAN	33 kDa	37.436	9.4574	11.009	19.3008	68.323	33.48	25.606	42.4697	84.681	49.039	11.75	48.49	13.441	16.986	13.31	14.579	37.137	9.0799	67.618	37.945	9.8194	12.427	10.909	11.0518
ADP/ATP translocase 4 OS=Homo sapiens GN=SLC25A31 PE=2 SV=1	ADT4_HUMAN	35 kDa	7.5882	0	5.0294	4.20587	27.987	9.7983	11.551	16.4454	70.815	34.621	2.637	36.0243	3.0233	1.6861	1.2988	2.00273	27.332	0	0	9.11067	0	0	0	0
Elongation factor Tu, mitochondrial OS=Homo sapiens GN=TUFM PE=1 SV=2	EFTU_HUMAN	50 kDa	54.531	58.653	44.215	52.4663	111.15	81.481	29.055	73.8953	333.15	157.04	285.42	258.537	161.25	210.56	144.48	172.097	353.18	175.15	189.81	239.38	161.03	64.16	70.894	98.6947
Trifunctional enzyme subunit beta, mitochondrial OS=Homo sapiens GN=HADHB PE=1 SV=3	ECHB_HUMAN	51 kDa	50.8	82.195	22.367	51.7873	19.068	48.185	19.16	28.8043	30.918	45.686	78.791	51.7983	24.268	100.45	106.27	76.996	28.897	28.005	26.757	27.8863	48.195	24.134	25.202	32.5103
Calnexin OS=Homo sapiens GN=CANX PE=1 SV=2	CALX_HUMAN	68 kDa	50.596	67.085	62.088	59.923	120.12	143.34	96.948	120.136	54.941	47.001	47.123	49.6883	40.062	44.742	51.626	45.4767	61.335	61.208	41.403	54.6487	58.174	54.566	51.463	54.7343
Dolichyl-diphosphooligosaccharide--protein glycosyltransferase subunit 1 OS=Homo sapiens GN=RPN1 PE=1 SV=1	RPN1_HUMAN	69 kDa	30.881	25.03	25.235	27.0487	20.657	16.709	34.775	24.047	31.976	49.216	50.033	43.7417	31.578	39.941	49.484	40.3343	24.998	31.453	24.51	26.987	40.249	34.412	33.418	36.0263
Sodium/potassium-transporting ATPase subunit alpha-1 OS=Homo sapiens GN=ATP1A1 PE=1 SV=1	AT1A1_HUMAN	113 kDa	32.25	25.106	38.62	31.992	67.315	32.166	27.802	42.4277	37.183	75.942	102.58	71.9017	50.306	45.099	70.455	55.2867	29.676	27.424	55.341	37.4803	42.903	48.502	44.465	45.29
Sodium/potassium-transporting ATPase subunit alpha-4 OS=Homo sapiens GN=ATP1A4 PE=1 SV=3	AT1A4_HUMAN	114 kDa	10.596	6.2851	23.786	13.5557	48.685	3.6354	6.3428	19.5544	13.648	32.776	26.26	24.228	28.557	8.0653	42.637	26.4198	4.9458	6.0669	42.454	17.8222	0	11.569	0	3.85633
Potassium-transporting ATPase alpha chain 2 OS=Homo sapiens GN=ATP12A PE=1 SV=3	AT12A_HUMAN	116 kDa	0	0	0	0	0	0	0	0	0	0	0	0	1.5117	0	2.9223	1.478	0	0	0	0	0	0	0	0
HLA class I histocompatibility antigen, A-2 alpha chain OS=Homo sapiens GN=HLA-A PE=1 SV=1	1A02_HUMAN (+1)	41 kDa	172.88	654.6	425.11	417.53	329.25	235.13	255.42	273.267	2.1848	0.98905	60.169	21.1143	127.74	114.73	161.38	134.617	3.9243	221.39	88.384	104.566	105.46	480.73	162.15	249.447
HLA class I histocompatibility antigen, A-24 alpha chain OS=Homo sapiens GN=HLA-A PE=1 SV=2	1A24_HUMAN	41 kDa	173.84	109.3	181.64	154.927	246.85	209.57	168.17	208.197	0.67958	0	59.838	20.1725	130.52	117.17	165.52	137.737	11.413	86.379	88.632	62.1413	104.55	247.23	84.99	145.59
78 kDa glucose-regulated protein OS=Homo sapiens GN=HSPA5 PE=1 SV=2	GRP78_HUMAN	72 kDa	39.604	30.886	33.557	34.6823	22.253	29.33	18.001	23.1947	54.017	39.484	37.03	43.5103	21.322	26.513	20.86	22.8983	38.172	35.674	53.382	42.4093	29.601	21.858	27.929	26.4627
Sarcoplasmic/endoplasmic reticulum calcium ATPase 2 OS=Homo sapiens GN=ATP2A2 PE=1 SV=1	AT2A2_HUMAN	115 kDa	70.874	54.238	23.489	49.5337	21.072	71.667	31.524	41.421	60.895	144.07	167.84	124.268	114.24	103.54	214.55	144.11	26.417	28.881	26.656	27.318	168.25	36.63	26.17	77.0167
Sarcoplasmic/endoplasmic reticulum calcium ATPase 1 OS=Homo sapiens GN=ATP2A1 PE=1 SV=1	AT2A1_HUMAN	110 kDa	37.679	41.761	10.701	30.047	4.5364	41.625	17.026	21.0625	42.761	111.99	122.2	92.317	88.595	85.021	177.92	117.179	7.332	12.003	15.839	11.7247	129.78	23.794	14.055	55.8763
MICOS complex subunit MIC60 OS=Homo sapiens GN=IMMT PE=1 SV=1	MIC60_HUMAN	84 kDa	31.311	45.591	33.51	36.804	30.304	37.2	49.677	39.0603	35.577	23.298	57.204	38.693	56.574	50.784	44.579	50.6457	31.776	21.978	15.898	23.2173	27.081	36.665	33.225	32.3237
NADPH--cytochrome P450 reductase OS=Homo sapiens GN=POR PE=1 SV=2	NCPR_HUMAN	77 kDa	46.124	38.152	30.518	38.2647	37.448	58.441	33.581	43.1567	83.665	67.137	72.601	74.4677	52.237	60.09	57.724	56.6837	49.838	56.944	25.669	44.1503	58.827	41.244	55.514	51.8617
Prohibitin-2 OS=Homo sapiens GN=PHB2 PE=1 SV=2	PHB2_HUMAN	33 kDa	18.703	22.227	21.578	20.836	20.57	13.694	30.183	21.4823	20.086	65.412	90.267	58.5883	34.274	29.108	88.307	50.563	27.105	29.648	34.151	30.3013	35.207	29.314	35.838	33.453
Dolichyl-diphosphooligosaccharide--protein glycosyltransferase subunit 2 OS=Homo sapiens GN=RPN2 PE=1 SV=3	RPN2_HUMAN	69 kDa	95.305	17.792	78.952	64.0163	77.352	34.121	90.061	67.178	31.624	33.51	24.678	29.9373	34.891	31.7	53.589	40.06	22.036	19.818	21.217	21.0237	40.783	28.398	29.701	32.9607
NADH-cytochrome b5 reductase 3 OS=Homo sapiens GN=CYB5R3 PE=1 SV=3	NB5R3_HUMAN	34 kDa	85.552	56.412	67.812	69.9253	70.728	127.5	162.12	120.116	11.931	10.974	14.698	12.5343	36.198	30.096	67.673	44.6557	27.123	52.779	34.744	38.2153	27.307	75.65	34.436	45.7977
60 kDa heat shock protein, mitochondrial OS=Homo sapiens GN=HSPD1 PE=1 SV=2	CH60_HUMAN	61 kDa	330.95	236.31	185.69	250.983	19.831	190.24	180.84	130.304	296.02	245.34	229.18	256.847	254	172.12	313.88	246.667	209.3	145.83	148.59	167.907	433.37	276.25	147.83	285.817
DNA-dependent protein kinase catalytic subunit OS=Homo sapiens GN=PRKDC PE=1 SV=3	PRKDC_HUMAN	469 kDa	18.897	27.091	46.856	30.948	52.896	27.183	36.529	38.8693	24.739	36.612	23.894	28.415	29.638	26.864	26.157	27.553	4.8591	9.9724	11.847	8.89283	8.0134	7.6028	6.3209	7.31237
Poly [ADP-ribose] polymerase 1 OS=Homo sapiens GN=PARP1 PE=1 SV=4	PARP1_HUMAN	113 kDa	27.405	46.467	27.058	33.6433	35.363	40.137	48.563	41.3543	37.161	29.429	36.107	34.2323	35.401	44.993	56.503	45.6323	14.074	10.356	15.439	13.2897	41.339	15.155	27.687	28.0603
Lamin-B1 OS=Homo sapiens GN=LMNB1 PE=1 SV=2	LMNB1_HUMAN	66 kDa	26.589	22.887	20.779	23.4183	29.766	35.475	27.675	30.972	44.86	39.792	24.459	36.3703	36.292	33.612	32.081	33.995	46.015	23.91	18.401	29.442	37.766	21.912	34.41	31.3627
Splicing factor, proline- and glutamine-rich OS=Homo sapiens GN=SFPQ PE=1 SV=2	SFPQ_HUMAN	76 kDa	40.345	825.26	151.46	339.022	154.78	137.24	723.01	338.343	187.72	19.603	20.447	75.9233	197.29	197.73	97.659	164.226	28.384	23.272	111.67	54.442	26.138	13.964	13.452	17.8513
Peroxiredoxin-1 OS=Homo sapiens GN=PRDX1 PE=1 SV=1	PRDX1_HUMAN	22 kDa	16.171	22.145	22.713	20.343	34.396	68.908	16.902	40.0687	224.75	208.72	173.76	202.41	101.77	91.586	64.615	85.9903	102.35	60.568	48.058	70.3253	74.95	25.26	42.66	47.6233
Histone H1.4 OS=Homo sapiens GN=HIST1H1E PE=1 SV=2	H14_HUMAN	22 kDa	27.656	22.041	52.014	33.9037	92.224	83.069	67.7	80.9977	101.77	20.657	38.787	53.738	181.27	170.23	50.662	134.054	203.26	101.13	244.78	183.057	123.3	64.304	193.47	127.025
Histone H1.3 OS=Homo sapiens GN=HIST1H1D PE=1 SV=2	H13_HUMAN	22 kDa	27.656	22.676	52.315	34.2157	92.224	83.4	67.405	81.0097	101.47	20.351	42.06	54.627	193.2	171.91	50.931	138.68	202.21	125.1	244.39	190.567	123.3	64.304	193.05	126.885
Histone H1.2 OS=Homo sapiens GN=HIST1H1C PE=1 SV=2	H12_HUMAN	21 kDa	26.963	22.041	52.014	33.6727	91.9	82.739	67.109	80.5827	100.86	20.351	39.051	53.4207	180.66	170.53	50.393	133.861	202.27	100.36	244.78	182.47	123.3	64.674	192.22	126.731
Dipeptidyl peptidase 4 OS=Homo sapiens GN=DPP4 PE=1 SV=2	DPP4_HUMAN	88 kDa	52.782	28.646	32.397	37.9417	28.376	20.541	27.396	25.4377	10.989	14.765	21.361	15.705	24.511	29.067	45.819	33.1323	28.653	60.292	55.709	48.218	47.774	58.3	48.08	51.3847
4F2 cell-surface antigen heavy chain OS=Homo sapiens GN=SLC3A2 PE=1 SV=3	4F2_HUMAN	68 kDa	15.664	16.337	19.999	17.3333	15.006	12.895	11.772	13.2243	13.118	16.727	33.874	21.2397	25.039	27.087	21.852	24.6593	37.073	38.356	27.947	34.4587	35.56	29.477	25.531	30.1893
Long-chain-fatty-acid--CoA ligase 3 OS=Homo sapiens GN=ACSL3 PE=1 SV=3	ACSL3_HUMAN	80 kDa	28.749	47.472	41.29	39.1703	31.128	19.067	27.182	25.7923	10.107	8.167	20.902	13.0587	37.862	21.241	25.748	28.2837	83.257	77.731	68.046	76.3447	72.661	84.269	91.385	82.7717
Elongation factor 2 OS=Homo sapiens GN=EEF2 PE=1 SV=4	EF2_HUMAN	95 kDa	59.183	185.55	110.56	118.431	24.431	19.735	73.672	39.2793	29.319	35.682	57.227	40.7427	39.812	10.66	14.352	21.608	60.559	78.309	97.03	78.6327	22.233	112.37	50.181	61.5947
Histone H2A type 2-B OS=Homo sapiens GN=HIST2H2AB PE=1 SV=3	H2A2B_HUMAN	14 kDa	161.84	52.213	103.41	105.821	357.84	225.5	223.8	269.047	194.64	229.45	110.37	178.153	233.41	185.09	103.96	174.153	284.85	165.2	210.49	220.18	103.2	91.031	250.56	148.264
Histone H2A type 1-D OS=Homo sapiens GN=HIST1H2AD PE=1 SV=2	H2A1D_HUMAN (+4)	14 kDa	393.73	328.96	387.02	369.903	486.27	420.2	324.17	410.213	314.73	322.85	246.88	294.82	436.08	266.4	213.31	305.263	427.85	366.66	315.69	370.067	180.46	212.68	385.45	259.53
Histone H2A type 1-B/E OS=Homo sapiens GN=HIST1H2AB PE=1 SV=2	H2A1B_HUMAN (+2)	14 kDa	393.73	328.96	387.02	369.903	486.27	420.2	324.17	410.213	314.05	322.16	243.61	293.273	436.08	268.43	211.69	305.4	427.85	366.15	315.2	369.733	178.84	211.14	384.18	258.053
Heterogeneous nuclear ribonucleoprotein M OS=Homo sapiens GN=HNRNPM PE=1 SV=3	HNRPM_HUMAN	78 kDa	45.626	43.704	43.098	44.1427	29.856	31.677	58.237	39.9233	16.644	15.498	20.329	17.4903	23.266	22.139	24.34	23.2483	1.8383	1.5342	10.729	4.7005	1.0097	0	2.4432	1.15097
Lamin-B2 OS=Homo sapiens GN=LMNB2 PE=1 SV=4	LMNB2_HUMAN	70 kDa	16.712	18.498	18.375	17.8617	16.875	16.543	23.653	19.0237	17.178	5.4604	14.737	12.4585	18.794	20.786	20.901	20.1603	30.985	19.693	17.121	22.5997	24.4	16.095	28.814	23.103
Heat shock cognate 71 kDa protein OS=Homo sapiens GN=HSPA8 PE=1 SV=1	HSP7C_HUMAN	71 kDa	36.589	33.742	36.498	35.6097	22.973	23.891	39.014	28.626	19.961	18.873	15.379	18.071	17.138	18.036	13.209	16.1277	14.965	33.764	22.299	23.676	13.998	44.537	12.453	23.6627
Endoplasmin OS=Homo sapiens GN=HSP90B1 PE=1 SV=1	ENPL_HUMAN	92 kDa	37.449	33.301	33.295	34.6817	14.091	13.443	5.5366	11.0235	30.106	34.784	36.24	33.71	14.386	9.2405	6.012	9.8795	34.367	43.456	37.668	38.497	20.304	25.732	22.784	22.94
Adipocyte plasma membrane-associated protein OS=Homo sapiens GN=APMAP PE=1 SV=2	APMAP_HUMAN	46 kDa	20.412	17.482	20.754	19.5493	45.692	33.57	16.139	31.8003	24.262	24.284	21.996	23.514	21.741	26.232	19.695	22.556	42.368	34.25	24.389	33.669	39.201	15.834	31.95	28.995
Calreticulin OS=Homo sapiens GN=CALR PE=1 SV=1	CALR_HUMAN	48 kDa	60.89	86.581	78.355	75.2753	103.67	37.051	39.089	59.9367	170.88	43.214	81.863	98.6523	8.636	29.233	6.4215	14.7635	61.373	55.103	73.083	63.1863	50.046	24.241	46.246	40.1777
Long-chain-fatty-acid--CoA ligase 4 OS=Homo sapiens GN=ACSL4 PE=1 SV=2	ACSL4_HUMAN	79 kDa	71.754	28.889	23.783	41.4753	35.493	44.783	29.66	36.6453	18.56	19.081	15.262	17.6343	21.908	20.637	64.636	35.727	13.836	17.573	18.213	16.5407	26.565	28.315	20.578	25.1527
Fatty acid synthase OS=Homo sapiens GN=FASN PE=1 SV=3	FAS_HUMAN	273 kDa	26.047	45.421	33.559	35.009	11.334	12.389	17.866	13.863	8.7482	14.784	11.866	11.7994	2.8243	3.4259	4.2339	3.4947	17.223	63.383	52.758	44.4547	3.61	78.159	30.501	37.4233
Epoxide hydrolase 1 OS=Homo sapiens GN=EPHX1 PE=1 SV=1	HYEP_HUMAN	53 kDa	15.008	19.539	26.436	20.3277	18.106	15.818	32.375	22.0997	8.757	15.222	18.435	14.138	10.273	13.79	14.49	12.851	24.28	54.282	55.95	44.8373	22.129	52.673	45.479	40.0937
Probable ATP-dependent RNA helicase DDX17 OS=Homo sapiens GN=DDX17 PE=1 SV=2	DDX17_HUMAN	80 kDa	8.7437	9.0112	13.237	10.3306	24.395	24.171	20.169	22.9117	10.456	5.4191	9.1588	8.34463	12.857	10.62	7.4747	10.3172	2.8274	1.5345	6.1242	3.49537	1.9956	3.7287	4.5607	3.42833
Probable ATP-dependent RNA helicase DDX5 OS=Homo sapiens GN=DDX5 PE=1 SV=1	DDX5_HUMAN	69 kDa	7.3825	6.8263	8.7402	7.64967	20.176	19.233	19.924	19.7777	6.912	5.5865	6.8454	6.44797	11.674	11.793	8.3834	10.6168	2.8274	1.5345	6.1242	3.49537	1.5906	2.9618	3.7205	2.75763
ATP-dependent RNA helicase DDX3X OS=Homo sapiens GN=DDX3X PE=1 SV=3	DDX3X_HUMAN	73 kDa	0	7.959	11.013	6.324	1.4691	3.5637	12.676	5.90293	2.1073	1.8738	3.8111	2.5974	0	0	1.4917	0.497233	3.6765	7.2882	3.6978	4.8875	0	2.6299	4.1166	2.24883
Ras-related protein Rab-10 OS=Homo sapiens GN=RAB10 PE=1 SV=1	RAB10_HUMAN	23 kDa	8.3436	8.8468	8.8079	8.6661	6.8901	8.3345	9.0151	8.0799	7.3801	9.1667	7.3905	7.9791	7.2292	8.9152	7.226	7.79013	13.82	12.405	8.354	11.5263	10.729	5.9765	7.1295	7.945
Ras-related protein Rab-1A OS=Homo sapiens GN=RAB1A PE=1 SV=3	RAB1A_HUMAN	23 kDa	7.2752	8.5534	7.2322	7.68693	6.5261	5.2878	5.6115	5.80847	9.109	7.732	6.5925	7.81117	6.0811	7.011	5.4353	6.1758	13.936	8.1848	65.596	29.2389	14.664	7.0344	7.1119	9.60343
Ras-related protein Rab-14 OS=Homo sapiens GN=RAB14 PE=1 SV=4	RAB14_HUMAN	24 kDa	0.80017	7.1889	3.336	3.77502	5.1566	2.394	1.5599	3.03683	2.4471	0.68255	0.66098	1.26354	0.67355	0.631	1.4563	0.920283	0	0.76708	0	0.255693	1.2149	1.8644	0.42186	1.16705
Ras-related protein Rab-1B OS=Homo sapiens GN=RAB1B PE=1 SV=1	RAB1B_HUMAN	22 kDa	6.5823	8.2361	7.2939	7.37077	5.554	4.6269	5.4108	5.19723	8.8466	7.7668	7.1867	7.93337	5.7788	6.7067	5.491	5.99217	13.325	8.0573	6.5034	9.29523	12.103	6.3071	6.2823	8.2308
Ras-related protein Rab-8A OS=Homo sapiens GN=RAB8A PE=1 SV=1	RAB8A_HUMAN	24 kDa	4.8501	4.7525	4.2188	4.60713	4.2124	4.7074	0	2.97327	5.1953	4.5975	4.2192	4.67067	3.9304	5.1961	4.6841	4.60353	8.0881	4.9884	3.8774	5.6513	7.5188	2.9618	4.6089	5.02983
Ras-related protein Rab-35 OS=Homo sapiens GN=RAB35 PE=1 SV=1	RAB35_HUMAN	23 kDa	0.80017	0.62255	0.72614	0.716287	0.73906	0.37076	0.77994	0.62992	0	3.9845	0.66098	1.54849	0.67355	0.3155	0	0.329683	29.544	3.8373	0	11.1271	11.984	0.38344	0	4.12248
Ras-related protein Rab-3C OS=Homo sapiens GN=RAB3C PE=2 SV=1	RAB3C_HUMAN	26 kDa	0	0	0	0	0	1.9829	1.1814	1.05477	0	0	0	0	0	0	0	0	0	0	0	0	0	0	0	0
Protein disulfide-isomerase OS=Homo sapiens GN=P4HB PE=1 SV=3	PDIA1_HUMAN	57 kDa	85.008	18.943	31.952	45.301	29.807	16.064	33.914	26.595	46.871	18.882	71.009	45.5873	59.757	58.698	41.403	53.286	38.984	48.864	97.76	61.8693	34.833	62.54	30.591	42.6547
Heterogeneous nuclear ribonucleoprotein U OS=Homo sapiens GN=HNRNPU PE=1 SV=6	HNRPU_HUMAN	91 kDa	112.26	57.059	27.823	65.714	113.63	120.28	55.461	96.457	21.895	102.86	113.6	79.4517	48.601	27.439	106.89	60.9767	6.4594	7.5439	16.005	10.0028	4.8011	4.9319	2.953	4.22867
Dolichyl-diphosphooligosaccharide--protein glycosyltransferase 48 kDa subunit OS=Homo sapiens GN=DDOST PE=1 SV=4	OST48_HUMAN	51 kDa	16.765	27.845	26.371	23.6603	10.299	8.0928	49.964	22.7853	7.5738	8.3054	10.223	8.70073	6.7891	33.934	47.246	29.323	8.5127	7.546	31.114	15.7242	29.848	59.044	39.141	42.6777
Heterogeneous nuclear ribonucleoprotein A1 OS=Homo sapiens GN=HNRNPA1 PE=1 SV=5	ROA1_HUMAN	39 kDa	144.33	138.01	117.81	133.383	42.501	33.651	192.74	89.6307	19.636	16.329	33.171	23.0453	51.266	42.13	44.193	45.863	5.1485	16.788	140.53	54.1555	1.2149	29.755	27.986	19.652
Heterogeneous nuclear ribonucleoprotein A1-like 2 OS=Homo sapiens GN=HNRNPA1L2 PE=2 SV=2	RA1L2_HUMAN	34 kDa	139.96	136.77	113.98	130.237	38.486	27.169	180.09	81.915	15.705	12.916	28.561	19.0607	46.126	38.66	38.927	41.2377	4.5957	16.02	137.03	52.5486	0	27.11	8.6548	11.9216
Basigin OS=Homo sapiens GN=BSG PE=1 SV=2	BASI_HUMAN	42 kDa	17.061	13.216	16.696	15.6577	96.723	78.223	43.99	72.9787	30.616	38.498	26.697	31.937	22.679	23.061	17.097	20.9457	45.336	19.218	12.883	25.8123	35.779	24.262	27.11	29.0503
Fatty aldehyde dehydrogenase OS=Homo sapiens GN=ALDH3A2 PE=1 SV=1	AL3A2_HUMAN	55 kDa	16.893	42.883	34.471	31.4157	17.308	20.253	55.235	30.932	12.486	14.982	15.565	14.3443	13.174	9.9701	12.961	12.035	10.3	36.645	6.9911	17.9787	14.803	46.101	53.808	38.2373
Cytochrome b5 type B OS=Homo sapiens GN=CYB5B PE=1 SV=2	CYB5B_HUMAN	16 kDa	19.551	14.303	36.737	23.5303	165.36	206.74	104.03	158.71	15.74	10.551	49.004	25.0983	50.332	32.257	126.42	69.6697	80.854	281.74	93.274	151.956	244.69	186.05	191.61	207.45
Cytochrome b-c1 complex subunit 2, mitochondrial OS=Homo sapiens GN=UQCRC2 PE=1 SV=3	QCR2_HUMAN	48 kDa	19.474	17.429	17.788	18.2303	23.135	35.987	16.697	25.273	17.296	21.667	20.571	19.8447	21.857	19.56	16.651	19.356	6.6044	18.923	13.695	13.0741	19.405	19.612	16.444	18.487
ATP synthase subunit d, mitochondrial OS=Homo sapiens GN=ATP5H PE=1 SV=3	ATP5H_HUMAN	18 kDa	66.007	12.166	30.875	36.3493	38.474	49.666	25.545	37.895	36.63	70.626	131.48	79.5787	26.796	23.48	71.211	40.4957	9.6017	16.366	10.441	12.1362	19.414	9.0678	12.503	13.6616
Solute carrier family 2, facilitated glucose transporter member 1 OS=Homo sapiens GN=SLC2A1 PE=1 SV=2	GTR1_HUMAN	54 kDa	16.37	18.868	14.023	16.4203	23.738	21.157	14.93	19.9417	14.444	15.963	14.258	14.8883	13.84	14.706	15.2	14.582	52.109	18.539	13.854	28.1673	19.61	15.131	16.701	17.1473
Protein ERGIC-53 OS=Homo sapiens GN=LMAN1 PE=1 SV=2	LMAN1_HUMAN	58 kDa	25.884	17.9	23.957	22.5803	21.525	21.656	17.879	20.3533	14.316	14.803	16.902	15.3403	11.014	14.153	17.355	14.174	25.722	29.661	20.175	25.186	27.008	28.119	25.995	27.0407
Matrin-3 OS=Homo sapiens GN=MATR3 PE=1 SV=2	MATR3_HUMAN	95 kDa	28.06	33.044	29.404	30.1693	32.956	38.708	44.081	38.5817	49.652	43.565	45.15	46.1223	27.179	22.127	16.176	21.8273	0	4.4801	26.019	10.1664	7.0677	1.9026	4.1114	4.36057
Vesicle-associated membrane protein-associated protein A OS=Homo sapiens GN=VAPA PE=1 SV=3	VAPA_HUMAN	28 kDa	9.612	14.856	8.5064	10.9915	17.504	24.785	12.158	18.149	106.69	66.405	44.607	72.5673	31.662	48.276	32.877	37.605	88.923	42.944	39.095	56.9873	61.366	24.147	22.542	36.0183
Leucine-rich PPR motif-containing protein, mitochondrial OS=Homo sapiens GN=LRPPRC PE=1 SV=3	LPPRC_HUMAN	158 kDa	13.003	11.778	15.986	13.589	10.025	12.733	11.6	11.4527	11.836	21.621	16.375	16.6107	9.4624	9.2307	13.467	10.72	9.2286	19.436	17.076	15.2469	2.1834	16.864	8.4056	9.151
Integrin beta-1 OS=Homo sapiens GN=ITGB1 PE=1 SV=2	ITB1_HUMAN	88 kDa	18.519	14.356	21.677	18.184	25.719	58.238	33.664	39.207	16.787	26.037	50.265	31.0297	14.548	17.058	41.909	24.505	4.7426	6.009	2.6261	4.45923	5.2354	6.4393	7.9802	6.55163
Desmoplakin OS=Homo sapiens GN=DSP PE=1 SV=3	DESP_HUMAN	332 kDa	14.13	14.815	15.948	14.9643	19.423	17.356	22.308	19.6957	25.755	15.922	15.213	18.9633	17.152	16.615	19.201	17.656	3.322	4.1479	4.6048	4.0249	5.8053	5.2994	13.276	8.1269
Cytochrome b-c1 complex subunit 1, mitochondrial OS=Homo sapiens GN=UQCRC1 PE=1 SV=3	QCR1_HUMAN	53 kDa	19.824	10.572	9.7338	13.3766	12.154	13.923	12.367	12.8147	49.494	52.162	35.468	45.708	42.311	33.794	73.565	49.89	9.4851	10.995	6.715	9.06503	10.312	11.437	47.004	22.9177
Sulfide:quinone oxidoreductase, mitochondrial OS=Homo sapiens GN=SQRDL PE=1 SV=1	SQRD_HUMAN	50 kDa	19.212	12.93	10.725	14.289	22.521	20.134	21.478	21.3777	16.259	23.941	24.434	21.5447	24.373	27.533	42.486	31.464	4.248	10.229	8.2461	7.57437	35.996	7.8935	4.5866	16.1587
Polypyrimidine tract-binding protein 1 OS=Homo sapiens GN=PTBP1 PE=1 SV=1	PTBP1_HUMAN	57 kDa	28.835	13.428	11.465	17.9093	22.999	28.429	23.99	25.1393	12.942	48.526	33.659	31.709	42.771	17.188	20.071	26.6767	54.664	0	14.617	23.0937	24.373	1.5338	1.2656	9.05747
Reticulon-4 OS=Homo sapiens GN=RTN4 PE=1 SV=2	RTN4_HUMAN	130 kDa	9.9779	14.766	13.467	12.737	17.209	23.19	7.7413	16.0468	43.572	38.508	21.927	34.669	31.768	50.161	33.616	38.515	24.777	22.374	18.174	21.775	31.872	16.708	26.971	25.1837
Long-chain-fatty-acid--CoA ligase 5 OS=Homo sapiens GN=ACSL5 PE=1 SV=1	ACSL5_HUMAN	76 kDa	14.584	10.943	11.968	12.4983	9.6188	9.3259	19.015	12.6532	12.098	9.6471	7.06	9.6017	11.47	11.755	10.798	11.341	18.184	19.306	21.496	19.662	18.929	19.217	18.903	19.0163
Cytochrome c oxidase subunit 4 isoform 1, mitochondrial OS=Homo sapiens GN=COX4I1 PE=1 SV=1	COX41_HUMAN	20 kDa	18.469	20.331	16.079	18.293	24.523	28.895	11.294	21.5707	85.694	102.09	56.077	81.287	89.614	64.178	46.77	66.854	91.899	44.523	31.804	56.0753	72.916	14.331	35.269	40.8387
Protein disulfide-isomerase A3 OS=Homo sapiens GN=PDIA3 PE=1 SV=4	PDIA3_HUMAN	57 kDa	31.988	23.156	21.723	25.6223	6.1183	3.5284	4.2606	4.63577	10.477	8.7276	15.292	11.4989	1.5806	1.3146	5.443	2.7794	20.825	29.663	34.249	28.2457	12.479	26.037	18.703	19.073
Very-long-chain 3-oxoacyl-CoA reductase OS=Homo sapiens GN=HSD17B12 PE=1 SV=2	DHB12_HUMAN	34 kDa	4.6646	9.2937	9.6978	7.88537	21.331	16.121	13.404	16.952	130.86	41.131	35.411	69.134	8.5201	65.266	15.141	29.6424	17.827	12.786	32.141	20.918	24.868	20.374	15.38	20.2073
Heterogeneous nuclear ribonucleoproteins A2/B1 OS=Homo sapiens GN=HNRNPA2B1 PE=1 SV=2	ROA2_HUMAN	37 kDa	151.85	135.71	104.63	130.73	40.247	29.741	179.76	83.2493	31.436	20.634	25.719	25.9297	25.496	40.887	48.056	38.1463	9.6398	20.479	148.97	59.6963	5.992	31.218	30.496	22.5687
Prenylcysteine oxidase 1 OS=Homo sapiens GN=PCYOX1 PE=1 SV=3	PCYOX_HUMAN	57 kDa	61.146	43.235	29.641	44.674	23.376	11.939	38.841	24.7187	7.389	6.819	7.5909	7.2663	13.28	10.383	14.377	12.68	8.1179	50.504	4.9525	21.1915	43.531	68.534	51.294	54.453
60S ribosomal protein L15 OS=Homo sapiens GN=RPL15 PE=1 SV=2	RL15_HUMAN	24 kDa	26.895	36.78	26.336	30.0037	64.515	83.053	14.992	54.1867	232.73	95.7	71.128	133.186	100.1	152.36	69.598	107.353	88.568	63.997	72.207	74.924	63.574	23.692	33.768	40.3447
60S ribosomal protein L3 OS=Homo sapiens GN=RPL3 PE=1 SV=2	RL3_HUMAN	46 kDa	20.957	15.689	16.202	17.616	28.053	18.437	33.068	26.5193	13.743	11.3	9.4118	11.4849	12.775	13.477	11.159	12.4703	13.027	12.146	15.554	13.5757	31.535	9.1366	9.616	16.7625
60S ribosomal protein L3-like OS=Homo sapiens GN=RPL3L PE=2 SV=3	RL3L_HUMAN	46 kDa	1.6003	2.1789	2.1784	1.98587	9.5774	4.6809	4.9345	6.3976	0.67958	1.7064	1.6525	1.34616	1.6839	1.893	0.97411	1.517	0	0	0	0	0	1.1503	0	0.383433
Heterogeneous nuclear ribonucleoprotein L OS=Homo sapiens GN=HNRNPL PE=1 SV=2	HNRPL_HUMAN	64 kDa	13.657	286.23	24.683	108.19	51.618	45.79	227.1	108.169	9.3591	15.046	23.367	15.924	32.995	42.276	33.856	36.3757	0.55285	0.5113	7.4023	2.82215	0.80995	1.5338	0.84372	1.06249
DNA topoisomerase 1 OS=Homo sapiens GN=TOP1 PE=1 SV=2	TOP1_HUMAN	91 kDa	8.1581	9.951	9.5883	9.23247	11.978	10.34	11.104	11.1407	7.6513	7.8429	8.6491	8.04777	9.0777	9.253	9.6565	9.32907	16.584	23.018	17.316	18.9727	15.806	12.442	14.647	14.2983
DNA topoisomerase I, mitochondrial OS=Homo sapiens GN=TOP1MT PE=1 SV=1	TOP1M_HUMAN	70 kDa	1.6003	0	1.9315	1.17727	1.9442	0	2.0674	1.3372	0	0	0	0	2.2742	0	0	0.758067	0	2.6861	0	0.895367	0	0	2.1093	0.7031
Interleukin enhancer-binding factor 3 OS=Homo sapiens GN=ILF3 PE=1 SV=3	ILF3_HUMAN	95 kDa	40.359	17.13	15.518	24.3357	36.761	28.084	27.746	30.8637	21.09	19.995	25.373	22.1527	14.093	20.404	27.402	20.633	0	0	8.043	2.681	3.029	1.5192	1.6288	2.059
Phosphate carrier protein, mitochondrial OS=Homo sapiens GN=SLC25A3 PE=1 SV=2	MPCP_HUMAN	40 kDa	18.865	8.688	9.4028	12.3186	14.798	15.2	23.397	17.7983	13.243	8.4104	9.1993	10.2842	15.165	14.049	15.82	15.0113	12.016	10.869	11.186	11.357	11.451	11.665	11.345	11.487
Pre-mRNA-processing factor 19 OS=Homo sapiens GN=PRPF19 PE=1 SV=1	PRP19_HUMAN	55 kDa	114.37	27.157	19.703	53.7433	102.3	63.177	22.449	62.642	36.655	91.846	52.605	60.3687	76.538	89.969	56.166	74.2243	3.6765	3.0683	27.901	11.5486	15.979	0	9.5299	8.50297
Ubiquitin-40S ribosomal protein S27a OS=Homo sapiens GN=RPS27A PE=1 SV=2	RS27A_HUMAN	18 kDa	62.587	10.08	8.5301	27.0657	61.165	13.891	65.954	47.0033	7.2728	43.077	10.02	20.1233	35.347	8.34	12.401	18.696	17.998	12.916	7.9663	12.9601	26.411	10.525	15.11	17.3487
Non-POU domain-containing octamer-binding protein OS=Homo sapiens GN=NONO PE=1 SV=4	NONO_HUMAN	54 kDa	31.583	27.823	44.307	34.571	33.481	35.912	19.103	29.4987	39.821	47.029	40.311	42.387	53.308	44.125	40.104	45.8457	25.558	14.144	22.402	20.7013	20.017	11.346	17.982	16.4483
Leucine-rich repeat-containing protein 59 OS=Homo sapiens GN=LRRC59 PE=1 SV=1	LRC59_HUMAN	35 kDa	7.8312	8.1468	8.236	8.07133	12.439	9.1968	8.7739	10.1366	10.748	20.401	15.456	15.535	13.469	9.0044	14.669	12.3808	12.005	6.3928	11.579	9.99227	13.693	6.7831	11.73	10.7354
Ribosome-binding protein 1 OS=Homo sapiens GN=RRBP1 PE=1 SV=4	RRBP1_HUMAN	152 kDa	7.592	7.1078	7.1167	7.27217	9.8601	13.635	13.143	12.2127	13.872	10.889	8.9442	11.2351	15.35	13.606	15.177	14.711	16.169	7.5437	21.886	15.1996	18.771	14.966	27.559	20.432
Mannosyl-oligosaccharide glucosidase OS=Homo sapiens GN=MOGS PE=1 SV=5	MOGS_HUMAN	92 kDa	15.923	21.718	23.95	20.5303	15.017	8.9994	29.011	17.6758	12.027	12.446	12.548	12.3403	10.863	12.201	20.082	14.382	2.4729	37.79	22.964	21.0756	23.731	57.984	58.932	46.8823
Delta(24)-sterol reductase OS=Homo sapiens GN=DHCR24 PE=1 SV=2	DHC24_HUMAN	60 kDa	36.161	64.602	48.686	49.8163	27.061	5.7431	53.707	28.837	2.0775	4.9764	6.2228	4.42557	16.461	10.029	7.0923	11.1941	10.577	102.83	40.04	51.149	22.758	77.43	96.832	65.6733
Heterogeneous nuclear ribonucleoprotein A3 OS=Homo sapiens GN=HNRNPA3 PE=1 SV=2	ROA3_HUMAN	40 kDa	19.375	28.051	20.594	22.6733	23.884	32.089	26.768	27.5803	16.87	17.359	20.982	18.4037	21.507	18.038	17.939	19.1613	2.7642	4.4741	22.217	9.81843	2.8348	4.5485	1.6874	3.02357
Voltage-dependent anion-selective channel protein 3 OS=Homo sapiens GN=VDAC3 PE=1 SV=1	VDAC3_HUMAN	31 kDa	110.61	177.18	155.4	147.73	117.67	94.592	133.67	115.311	62.15	73.053	126.94	87.381	235.64	272.74	98.522	202.301	145.49	91.347	108.53	115.122	280.89	228.73	204.12	237.913
40S ribosomal protein S4, X isoform OS=Homo sapiens GN=RPS4X PE=1 SV=2	RS4X_HUMAN	30 kDa	38.295	26.611	21.893	28.933	26.475	31.595	11.179	23.083	14.238	12.864	43.688	23.5967	94.55	65.831	36.175	65.5187	104.92	47.151	70.406	74.159	75.188	7.1697	29.691	37.3496
40S ribosomal protein S4, Y isoform 1 OS=Homo sapiens GN=RPS4Y1 PE=1 SV=2	RS4Y1_HUMAN	29 kDa	34.03	23.457	17.976	25.1543	23.701	29.241	7.8469	20.263	10.286	8.8098	40.721	19.9389	92.062	63.374	33.643	63.0263	103.93	43.058	67.204	71.3973	72.019	3.798	25.494	33.7703
Clathrin heavy chain 1 OS=Homo sapiens GN=CLTC PE=1 SV=5	CLH1_HUMAN	192 kDa	15.958	18.75	15.621	16.7763	14.013	14.76	8.0657	12.2796	10.465	12.98	18.854	14.0997	6.9922	7.722	11.439	8.71773	25.173	19.657	21.485	22.105	13.812	38.594	13.287	21.8977
Clathrin heavy chain 2 OS=Homo sapiens GN=CLTCL1 PE=1 SV=2	CLH2_HUMAN	187 kDa	0	0	0	0	0	0	0	0	0	0	0	0	0	0	0	0	0	2.5565	0	0.852167	0	0	0	0
ATP-dependent RNA helicase A OS=Homo sapiens GN=DHX9 PE=1 SV=4	DHX9_HUMAN	141 kDa	16.749	34.306	24.896	25.317	18.566	15.195	42.641	25.4673	11.914	10.197	9.8233	10.6448	11.236	10.537	12.036	11.2697	4.2294	11.534	27.601	14.4548	1.2149	1.143	12.384	4.91397
Integrin alpha-2 OS=Homo sapiens GN=ITGA2 PE=1 SV=1	ITA2_HUMAN	129 kDa	16.186	21.522	16.842	18.1833	16.159	15.71	14.663	15.5107	14.417	13.93	13.381	13.9093	13.515	13.659	14.359	13.8443	6.1959	3.5796	1.591	3.78883	2.2127	4.1504	1.6288	2.66397
NAD(P) transhydrogenase, mitochondrial OS=Homo sapiens GN=NNT PE=1 SV=3	NNTM_HUMAN	114 kDa	12.344	9.0985	9.0004	10.1476	59.924	10.809	11.26	27.331	13.604	14.418	15.706	14.576	17.568	13.265	14.183	15.0053	1.1057	0.38373	1.9505	1.14664	90.785	37.658	34.824	54.4223
Calcium-binding mitochondrial carrier protein Aralar2 OS=Homo sapiens GN=SLC25A13 PE=1 SV=2	CMC2_HUMAN	74 kDa	12.608	10.427	13.451	12.162	14.57	14.074	13.362	14.002	13.526	15.436	15.635	14.8657	14.252	14.167	18.162	15.527	6.7792	9.335	9.8169	8.6437	10.324	9.3483	10.919	10.1971
ATP synthase subunit O, mitochondrial OS=Homo sapiens GN=ATP5O PE=1 SV=1	ATPO_HUMAN	23 kDa	8.2363	9.7985	11.041	9.69193	9.0673	9.5759	7.1714	8.60487	11.389	9.8145	9.1063	10.1033	9.1121	10.133	8.9974	9.41417	13.209	9.2074	8.354	10.2568	10.759	10.856	8.7959	10.137
Aspartyl/asparaginyl beta-hydroxylase OS=Homo sapiens GN=ASPH PE=1 SV=3	ASPH_HUMAN	86 kDa	8.4509	47.001	43.289	32.9136	9.6643	11.51	44.166	21.7801	6.2922	8.2472	8.2484	7.59593	8.7409	8.0356	7.764	8.18017	3.9566	12.558	9.6171	8.71057	9.7608	37.053	22.81	23.2079
ATP synthase subunit gamma, mitochondrial OS=Homo sapiens GN=ATP5C1 PE=1 SV=1	ATPG_HUMAN	33 kDa	11.217	8.1121	7.795	9.04137	7.0266	9.6967	8.2123	8.31187	10.03	25.774	15.206	17.0033	9.4078	13.042	11.375	11.2749	9.968	9.335	6.4436	8.5822	13.822	10.525	8.7841	11.0437
ATP synthase F(0) complex subunit B1, mitochondrial OS=Homo sapiens GN=ATP5F1 PE=1 SV=2	AT5F1_HUMAN	29 kDa	10.578	20.194	11.094	13.9553	14.022	14.969	11.09	13.3603	7.7675	5.6626	8.728	7.38603	11.957	12.11	12.993	12.3533	14.349	25.095	8.6621	16.0354	14.292	15.146	27.748	19.062
Core histone macro-H2A.1 OS=Homo sapiens GN=H2AFY PE=1 SV=4	H2AY_HUMAN	40 kDa	34.044	18.098	20.181	24.1077	18.253	22.359	26.743	22.4517	9.8063	26.103	34.269	23.3928	35.691	31.743	44.733	37.389	11.491	15.471	22.605	16.5223	28.985	14.001	25.332	22.7727
Very-long-chain enoyl-CoA reductase OS=Homo sapiens GN=TECR PE=1 SV=1	TECR_HUMAN	36 kDa	10.978	8.9456	12.593	10.8389	17.548	9.7154	11.018	12.7605	6.2324	3.7193	7.7137	5.88847	10.39	13.06	29.858	17.7693	23.615	19.943	7.2195	16.9258	19.611	12.595	20.322	17.5093
Amine oxidase [flavin-containing] A OS=Homo sapiens GN=MAOA PE=1 SV=1	AOFA_HUMAN	60 kDa	20.414	24.288	63.251	35.9843	24.522	20.881	33.073	26.1587	8.0653	6.3308	11.976	8.7907	13.109	14.633	17.019	14.9203	33.71	20.328	31.377	28.4717	34.728	52.912	65.384	51.008
Heterogeneous nuclear ribonucleoproteins C1/C2 OS=Homo sapiens GN=HNRNPC PE=1 SV=4	HNRPC_HUMAN	34 kDa	11.037	10.068	11.226	10.777	11.517	16.401	11.484	13.134	7.9524	15.434	10.361	11.2491	10.088	12.645	10.306	11.013	2.2114	0.38373	8.5538	3.71631	2.8348	1.1503	2.1058	2.0303
Kinectin OS=Homo sapiens GN=KTN1 PE=1 SV=1	KTN1_HUMAN	156 kDa	15.867	17.053	8.1911	13.7037	15.282	16.5	11.787	14.523	51.899	45.531	55.31	50.9133	15.117	16.701	98.042	43.2867	34.331	2.4292	5.001	13.9204	36.864	40.344	14.499	30.569
Protein disulfide-isomerase A6 OS=Homo sapiens GN=PDIA6 PE=1 SV=1	PDIA6_HUMAN	48 kDa	81.566	23.045	21.412	42.0077	20.763	45.041	24.131	29.9783	58.015	10.105	35.134	34.418	18.574	34.026	1.0759	17.892	6.6959	38.525	106.46	50.5603	4.7426	43.793	9.737	19.4242
Ras-related C3 botulinum toxin substrate 1 OS=Homo sapiens GN=RAC1 PE=1 SV=1	RAC1_HUMAN	21 kDa	6.8126	11.262	11.705	9.92653	16.59	20.622	9.1172	15.4431	65.381	41.847	45.59	50.9393	12.614	36.719	33.629	27.654	16.33	10.613	14.017	13.6533	19.829	8.6506	15.313	14.5975
Mitochondrial dicarboxylate carrier OS=Homo sapiens GN=SLC25A10 PE=1 SV=2	DIC_HUMAN	31 kDa	8.9583	14.72	15.482	13.0534	9.6188	9.9383	10.496	10.0177	7.845	6.5473	7.0669	7.15307	6.1577	8.1137	8.6363	7.6359	6.3429	36.439	15.3	19.3606	10.007	17.798	27.322	18.3757
Transmembrane 9 superfamily member 2 OS=Homo sapiens GN=TM9SF2 PE=1 SV=1	TM9S2_HUMAN	76 kDa	12.02	26.98	19.666	19.5553	38.392	57.559	7.6509	34.534	169.54	159.7	98.189	142.476	86.444	63.071	48.376	65.9637	97.672	63.081	43.955	68.236	24.8	24.939	39.975	29.9047
NADH dehydrogenase [ubiquinone] iron-sulfur protein 2, mitochondrial OS=Homo sapiens GN=NDUFS2 PE=1 SV=2	NDUS2_HUMAN	53 kDa	11.823	22.441	18.084	17.4493	46.351	19.504	21.399	29.0847	0.98063	0.34128	10.173	3.83164	54.854	45.123	19.001	39.6593	32.088	64.246	52.17	49.5013	35.378	48.133	23.705	35.7387
ATP-binding cassette sub-family D member 3 OS=Homo sapiens GN=ABCD3 PE=1 SV=1	ABCD3_HUMAN	75 kDa	5.6794	181.08	212.68	133.146	6.242	8.4955	107.09	40.6092	5.088	5.8648	7.2638	6.0722	8.3773	6.8406	6.4748	7.2309	3.2006	486.94	4.4766	164.872	6.5796	175.5	86.619	89.5662
High mobility group protein B1 OS=Homo sapiens GN=HMGB1 PE=1 SV=3	HMGB1_HUMAN	25 kDa	5.5537	7.8073	5.6356	6.3322	8.0867	12.731	1.8147	7.54413	15.186	3.7745	4.9043	7.95493	6.8631	4.1016	8.4227	6.46247	71.349	34.903	27.942	44.7313	69.497	30.031	42.927	47.485
Heat shock 70 kDa protein 1A OS=Homo sapiens GN=HSPA1A PE=1 SV=1	HS71A_HUMAN (+1)	70 kDa	21.291	24.925	26.153	24.123	8.432	12.725	21.115	14.0907	8.3099	19.713	12.674	13.5656	6.0191	25.951	6.4899	12.82	10.892	31.716	27.138	23.2487	1.9956	24.586	15.969	14.1835
Heat shock 70 kDa protein 6 OS=Homo sapiens GN=HSPA6 PE=1 SV=2	HSP76_HUMAN	71 kDa	3.1179	4.7227	5.7945	4.54503	4.3034	5.7391	5.2932	5.1119	5.6513	4.4301	4.3562	4.81253	3.0233	4.3166	1.2988	2.87957	4.4512	0	2.7142	2.38847	1.2149	4.8658	0	2.0269
Heat shock 70 kDa protein 1-like OS=Homo sapiens GN=HSPA1L PE=1 SV=2	HS71L_HUMAN	70 kDa	0	0	0	0	0	0	1.1699	0.389967	2.6198	12.194	6.2753	7.0297	0	0	0	0	2.7642	0	0	0.9214	0	0	1.2656	0.421867
Asialoglycoprotein receptor 1 OS=Homo sapiens GN=ASGR1 PE=1 SV=2	ASGR1_HUMAN	33 kDa	9.2483	27.49	26.904	21.2141	51.742	46.951	63.767	54.1533	2.9031	2.6954	7.369	4.3225	22.91	11.541	23.495	19.3153	100.85	57.099	65.829	74.5927	90.838	65.382	103.46	86.56
Catenin beta-1 OS=Homo sapiens GN=CTNNB1 PE=1 SV=1	CTNB1_HUMAN	85 kDa	16.301	20.895	25.262	20.8193	13.013	19.367	15.694	16.0247	8.4084	8.2885	16.685	11.1273	6.0543	28.461	26.905	20.4734	29.506	11.918	16.655	19.3597	3.8326	23.022	8.743	11.8659
Extended synaptotagmin-1 OS=Homo sapiens GN=ESYT1 PE=1 SV=1	ESYT1_HUMAN	123 kDa	7.1919	20.582	20.001	15.925	23.902	26.904	14.896	21.9007	6.7869	10.1	18.333	11.74	22.569	26.606	17.789	22.3213	1.8383	4.3467	4.6731	3.61937	14.427	6.069	6.8086	9.10153
Glycerol kinase OS=Homo sapiens GN=GK PE=1 SV=3	GLPK_HUMAN	61 kDa	7.8653	8.9933	9.5736	8.81073	11.844	8.7495	7.6659	9.4198	11.919	15.573	10.797	12.763	10.452	9.2706	9.9749	9.89917	9.28	8.6946	13.215	10.3965	11.323	7.5486	6.2001	8.35723
Glycerol kinase 2 OS=Homo sapiens GN=GK2 PE=2 SV=2	GLPK2_HUMAN	61 kDa	0	0	0	0	0	0	0	0	0	0	0	0	0.67355	0	0	0.224517	0	0	0	0	0	0	0	0
ATPase family AAA domain-containing protein 3A OS=Homo sapiens GN=ATAD3A PE=1 SV=2	ATD3A_HUMAN	71 kDa	4.4255	6.9195	5.6166	5.65387	7.9077	7.4638	6.9478	7.43977	7.6126	8.1494	6.2724	7.3448	4.8106	8.3511	8.1444	7.10203	10.183	9.4618	7.7783	9.14103	9.1973	8.6461	8.3986	8.74733
ATPase family AAA domain-containing protein 3B OS=Homo sapiens GN=ATAD3B PE=1 SV=1	ATD3B_HUMAN	73 kDa	2.1323	2.8432	2.1094	2.36163	5.1289	3.5819	3.3319	4.01423	3.088	5.0672	4.0748	4.07667	4.6518	5.6615	4.3841	4.89913	6.4296	3.1974	2.3264	3.98447	4.989	4.4428	3.7651	4.39897
Nucleolar protein 56 OS=Homo sapiens GN=NOP56 PE=1 SV=4	NOP56_HUMAN	66 kDa	15.418	9.7388	13.92	13.0256	10.762	14.893	15.443	13.6993	9.4576	8.9297	9.5035	9.29693	8.7409	8.9375	7.5507	8.4097	1.542	2.8129	17.167	7.17397	1.5906	4.1618	3.0229	2.9251
60S ribosomal protein L4 OS=Homo sapiens GN=RPL4 PE=1 SV=5	RL4_HUMAN	48 kDa	11.183	9.0578	13.06	11.1003	12	9.9737	9.1098	10.3612	6.6707	5.4539	6.9299	6.3515	7.2637	8.9598	8.1134	8.1123	7.2737	4.9864	6.8031	6.3544	6.6089	8.7048	7.9216	7.7451
L-lactate dehydrogenase A chain OS=Homo sapiens GN=LDHA PE=1 SV=2	LDHA_HUMAN	37 kDa	7.3043	5.2868	9.5957	7.3956	5.7102	11.673	5.1405	7.5079	2.4084	6.0904	12.328	6.94227	2.4016	4.5861	1.8829	2.95687	27.162	28.538	27.028	27.576	6.2001	63.826	27.884	32.6367
Regulator of chromosome condensation OS=Homo sapiens GN=RCC1 PE=1 SV=1	RCC1_HUMAN	45 kDa	40.751	13.873	22.04	25.5547	54.243	30.237	35.234	39.9047	1.2817	0.3065	5.6822	2.42347	36.976	18.81	58.175	37.987	3.084	6.9044	9.8106	6.59967	7.8246	18.568	15.309	13.9005
Aminopeptidase N OS=Homo sapiens GN=ANPEP PE=1 SV=4	AMPN_HUMAN	110 kDa	7.12	9.6672	8.7748	8.52067	10.79	9.3712	4.1119	8.09103	7.6901	9.821	10.878	9.46303	11.284	10.101	16.572	12.6523	5.4702	3.4515	5.5918	4.83783	9.0332	16.276	12.092	12.4671
Hemoglobin subunit beta OS=Homo sapiens GN=HBB PE=1 SV=2	HBB_HUMAN	16 kDa	767.82	397.08	331.46	498.787	539.04	715.84	401.99	552.29	0	0	0	0	118.16	66.44	0	61.5333	275.77	142.94	170.69	196.467	143.43	126.34	138.13	135.967
60S ribosomal protein L7a OS=Homo sapiens GN=RPL7A PE=1 SV=2	RL7A_HUMAN	30 kDa	7.5971	10.051	5.7945	7.8142	8.2772	7.5929	9.8383	8.56947	8.6707	9.4797	8.7159	8.95543	7.8683	6.8294	6.911	7.2029	10.533	5.8825	4.4649	6.96013	6.2039	11.71	14.173	10.6956
Heterogeneous nuclear ribonucleoprotein K OS=Homo sapiens GN=HNRNPK PE=1 SV=1	HNRPK_HUMAN	51 kDa	8.2654	9.5345	11.22	9.6733	15.028	20.146	17.105	17.4263	11.785	9.1589	14.301	11.7483	8.7334	10.394	9.452	9.52647	5.3419	2.4289	10.381	6.0506	0.80995	0.75367	1.2656	0.943073
Histone H2A.V OS=Homo sapiens GN=H2AFV PE=1 SV=3	H2AV_HUMAN (+1)	14 kDa	182.49	93.316	234.04	169.949	187.59	228.75	148.96	188.433	262.81	275.68	143.64	227.377	396.83	236.11	157.29	263.41	429.12	310.08	307.52	348.907	136.43	168.77	337.97	214.39
Succinate dehydrogenase [ubiquinone] flavoprotein subunit, mitochondrial OS=Homo sapiens GN=SDHA PE=1 SV=2	SDHA_HUMAN	73 kDa	2.7323	7.044	4.2429	4.67307	9.5564	9.2102	7.4093	8.7253	2.4261	2.2285	1.6348	2.09647	3.0503	3.3654	1.3696	2.5951	70.243	127.81	46.288	81.447	29.262	90.329	78.23	65.9403
Transferrin receptor protein 1 OS=Homo sapiens GN=TFRC PE=1 SV=2	TFR1_HUMAN	85 kDa	7.3579	6.291	7.8495	7.16613	9.3403	10.648	10.102	10.0301	8.0597	9.1319	9.8974	9.02967	9.8546	9.8951	11.159	10.3029	0.49458	1.0226	1.9505	1.15589	2.6177	2.2742	5.4526	3.44817
Cytochrome c oxidase subunit 2 OS=Homo sapiens GN=MT-CO2 PE=1 SV=1	COX2_HUMAN	26 kDa	7.4116	5.9917	9.1253	7.50953	14.067	15.457	9.7768	13.1003	7.1178	7.7385	7.6577	7.50467	7.6349	7.7647	7.733	7.71087	5.4404	9.9739	8.8416	8.0853	6.6089	6.4128	7.1365	6.7194
14-3-3 protein zeta/delta OS=Homo sapiens GN=YWHAZ PE=1 SV=1	1433Z_HUMAN	28 kDa	4.3182	5.0638	6.1738	5.18527	3.3313	3.9659	2.6581	3.31843	3.6901	2.4868	2.4401	2.87233	2.1163	1.5217	1.8829	1.8403	3.6951	5.115	9.7052	6.17177	2.5884	5.5931	3.7757	3.98573
14-3-3 protein epsilon OS=Homo sapiens GN=YWHAE PE=1 SV=1	1433E_HUMAN	29 kDa	4.6646	4.7466	4.0409	4.48403	3.0073	3.3452	1.7721	2.7082	1.845	3.0998	3.298	2.7476	2.7555	1.2174	1.8829	1.95193	0	2.5575	6.1157	2.89107	1.7785	5.2229	3.3468	3.4494
14-3-3 protein beta/alpha OS=Homo sapiens GN=YWHAB PE=1 SV=3	1433B_HUMAN	28 kDa	4.3182	4.4234	3.0134	3.91833	1.2961	2.3537	2.3627	2.00417	2.4859	2.1803	1.9127	2.19297	1.814	0	0	0.604667	2.7642	3.8363	8.6419	5.0808	2.5884	5.9898	1.2656	3.28127
14-3-3 protein theta OS=Homo sapiens GN=YWHAQ PE=1 SV=1	1433T_HUMAN	28 kDa	2.8251	2.8491	3.3147	2.9963	1.6201	2.6439	1.7721	2.01203	2.1848	2.7585	2.4401	2.46113	0	1.5217	1.6139	1.0452	2.2114	3.8363	6.2156	4.08777	2.5884	4.1122	1.2656	2.6554
14-3-3 protein eta OS=Homo sapiens GN=YWHAH PE=1 SV=4	1433F_HUMAN	28 kDa	1.7322	2.2206	2.4107	2.12117	1.6201	0	0	0.540033	2.1073	1.5325	1.5822	1.74067	0	0	0	0	0	1.9186	4.2651	2.06123	0	2.5916	0	0.863867
14-3-3 protein gamma OS=Homo sapiens GN=YWHAG PE=1 SV=2	1433G_HUMAN	28 kDa	1.7322	3.4896	2.4107	2.54417	0	2.3134	0	0.771133	0	0	1.5822	0.5274	0	0	0	0	0	0	0	0	0	2.5916	0	0.863867
Serpin H1 OS=Homo sapiens GN=SERPINH1 PE=1 SV=2	SERPH_HUMAN	46 kDa	8.5239	19.404	14.607	14.1783	2.5321	2.8271	9.0927	4.8173	3.9225	3.2389	4.052	3.7378	1.9518	1.2397	2.9931	2.06153	16.549	25.186	14.127	18.6207	15.073	19.382	20.343	18.266
Transmembrane emp24 domain-containing protein 10 OS=Homo sapiens GN=TMED10 PE=1 SV=2	TMEDA_HUMAN	25 kDa	5.0938	5.95	5.4387	5.49417	7.5781	7.6249	7.2316	7.4782	5.5827	5.593	7.0669	6.08087	5.8898	6.2653	5.6218	5.92563	11.755	13.936	5.5518	10.4143	13.488	9.9035	9.2563	10.8826
Inositol 1,4,5-trisphosphate receptor type 3 OS=Homo sapiens GN=ITPR3 PE=1 SV=2	ITPR3_HUMAN	304 kDa	8.1774	8.5064	11.748	9.47727	15.653	8.2044	14.062	12.6398	11.064	10.005	6.4814	9.18347	12.739	12.993	19.776	15.1693	2.7574	3.0683	1.4313	2.419	7.273	4.2033	6.9956	6.1573
Inositol 1,4,5-trisphosphate receptor type 2 OS=Homo sapiens GN=ITPR2 PE=1 SV=2	ITPR2_HUMAN	308 kDa	2.3322	13.147	4.3355	6.6049	1.4781	0	10.234	3.90403	0.67958	0	0	0.226527	0	0	0.64941	0.21647	0.55285	1.9234	0	0.825417	10.744	1.1355	0.84372	4.24107
MICOS complex subunit MIC19 OS=Homo sapiens GN=CHCHD3 PE=1 SV=1	MIC19_HUMAN	26 kDa	5.211	8.5948	6.3912	6.73233	9.2985	8.3384	6.9614	8.19943	14.739	44.434	48.896	36.023	18.588	32.316	17.372	22.7587	13.085	10.101	8.3111	10.499	10.661	7.202	9.8983	9.25377
Catenin delta-1 OS=Homo sapiens GN=CTNND1 PE=1 SV=1	CTND1_HUMAN	108 kDa	10.066	9.2688	6.8528	8.7292	9.0426	10.237	7.3591	8.87957	12.59	12.735	6.5658	10.6303	11.936	6.9904	8.4477	9.1247	5.2837	5.2416	5.392	5.30577	5.4232	5.6988	6.3209	5.8143
Peptidyl-prolyl cis-trans isomerase B OS=Homo sapiens GN=PPIB PE=1 SV=2	PPIB_HUMAN	24 kDa	8.5582	7.5421	6.4589	7.51973	6.657	7.4235	8.2237	7.43473	4.8644	3.0019	4.0257	3.964	2.9621	2.806	2.8109	2.85967	12.877	7.546	6.5034	8.97547	12.625	12.442	14.716	13.261
Alpha-actinin-4 OS=Homo sapiens GN=ACTN4 PE=1 SV=2	ACTN4_HUMAN	105 kDa	25.322	19.995	29.56	24.959	26.058	17.951	7.0927	17.0339	17.273	13.595	52.837	27.9017	13.341	26.07	10.048	16.4863	87.74	32.376	74.741	64.9523	11.984	83.763	28.752	41.4997
Alpha-actinin-1 OS=Homo sapiens GN=ACTN1 PE=1 SV=2	ACTN1_HUMAN	103 kDa	16.312	11.267	16.464	14.681	23.113	14.036	3.6229	13.5906	17.273	13.595	46.772	25.88	12.578	29.735	8.3815	16.8982	76.696	26.228	54.015	52.313	9.9867	63.423	11.008	28.1392
Alpha-actinin-2 OS=Homo sapiens GN=ACTN2 PE=1 SV=1	ACTN2_HUMAN	104 kDa	0	10.956	4.4481	5.1347	0	0	0	0	0	0	0	0	0	8.4304	0	2.81013	0	0	2.1469	0.715633	0	11.355	0	3.785
60S ribosomal protein L10 OS=Homo sapiens GN=RPL10 PE=1 SV=4	RL10_HUMAN	25 kDa	13.638	25.033	17.574	18.7483	8.7574	6.5882	8.5098	7.9518	5.5141	4.7083	2.8408	4.3544	4.9139	6.0551	7.8027	6.25723	11.004	16.492	21.441	16.3123	6.8002	15.905	25.425	16.0434
Interleukin enhancer-binding factor 2 OS=Homo sapiens GN=ILF2 PE=1 SV=2	ILF2_HUMAN	43 kDa	11.615	10.79	10.284	10.8963	12.218	9.9325	13.845	11.9985	3.9225	62.045	49.334	38.4338	45.258	57.104	31.183	44.515	55.583	0	5.1691	20.2507	42.609	71.958	64.403	59.6567
Alpha-enolase OS=Homo sapiens GN=ENO1 PE=1 SV=2	ENOA_HUMAN	47 kDa	16.465	9.7221	13.019	13.0687	4.8049	4.0867	2.8473	3.91297	2.8257	4.7018	69.05	25.5258	0.94145	0.92418	15.26	5.70854	8.3212	7.9283	15.234	10.4945	31.712	24.69	2.9355	19.7792
Gamma-enolase OS=Homo sapiens GN=ENO2 PE=1 SV=3	ENOG_HUMAN	47 kDa	0	0	0	0	0	0	0	0	0	0	0	0	0	0	0	0	0	0	0	0	3.141	1.5192	0	1.5534
Spliceosome RNA helicase DDX39B OS=Homo sapiens GN=DDX39B PE=1 SV=1	DX39B_HUMAN	49 kDa	8.9583	9.0925	8.946	8.99893	13.678	14.057	12.239	13.3247	3.9225	3.3084	4.757	3.99597	7.5737	4.7213	3.7293	5.34143	1.1057	2.5565	9.153	4.27173	0	0.76689	1.2656	0.677497
ATP-dependent RNA helicase DDX39A OS=Homo sapiens GN=DDX39A PE=1 SV=2	DX39A_HUMAN	49 kDa	6.6651	6.2732	7.2541	6.7308	11.643	11.252	9.3089	10.7346	2.2623	1.7064	3.9659	2.64487	5.7252	3.4705	3.0799	4.09187	1.1057	2.5565	7.7901	3.81743	0	0.76689	1.2656	0.677497
X-ray repair cross-complementing protein 6 OS=Homo sapiens GN=XRCC6 PE=1 SV=2	XRCC6_HUMAN	70 kDa	7.3579	9.9152	11.706	9.6597	8.7651	13.051	12	11.272	6.0299	6.3628	5.5446	5.9791	7.8683	6.8597	7.5197	7.4159	0.49458	3.3246	7.0113	3.61016	1.2149	7.2034	2.0988	3.5057
Heterogeneous nuclear ribonucleoprotein H OS=Homo sapiens GN=HNRNPH1 PE=1 SV=4	HNRH1_HUMAN	49 kDa	10.524	18.409	17.653	15.5287	17.108	29.024	13.571	19.901	37.336	15.471	21.048	24.6183	13.798	17.646	11.74	14.3947	4.0497	2.4292	7.3957	4.62487	1.2149	1.8967	1.2363	1.4493
Heterogeneous nuclear ribonucleoprotein H2 OS=Homo sapiens GN=HNRNPH2 PE=1 SV=1	HNRH2_HUMAN	49 kDa	6.9882	6.5199	8.8923	7.4668	10.1	18.829	11.82	13.583	27.45	7.139	6.6783	13.7558	6.0334	6.0439	5.6926	5.9233	2.2114	1.2784	1.4313	1.64037	1.2149	0	0	0.404967
X-ray repair cross-complementing protein 5 OS=Homo sapiens GN=XRCC5 PE=1 SV=3	XRCC5_HUMAN	83 kDa	16.182	18.12	14.137	16.1463	19.872	15.031	20.943	18.6153	4.7094	5.4539	7.696	5.9531	3.8347	6.6977	10.167	6.8998	0.55285	11.075	3.4133	5.01372	2.6177	12.963	7.8242	7.80163
Mitochondrial carrier homolog 2 OS=Homo sapiens GN=MTCH2 PE=1 SV=1	MTCH2_HUMAN	33 kDa	7.7725	10.281	11.762	9.9385	9.3166	7.1908	12.286	9.5978	8.7748	6.8325	8.3712	7.99283	5.7999	6.6861	7.5851	6.69037	9.6996	8.9505	1.819	6.82303	7.6066	6.0955	7.5278	7.07663
Sideroflexin-1 OS=Homo sapiens GN=SFXN1 PE=1 SV=4	SFXN1_HUMAN	36 kDa	10.943	6.5964	6.5206	8.02	6.8446	8.4906	5.8725	7.06923	7.8838	7.1255	7.987	7.66543	5.7176	7.513	5.9368	6.38913	6.7792	6.01	4.177	5.6554	9.3851	7.55	7.9837	8.30627
Poly(rC)-binding protein 1 OS=Homo sapiens GN=PCBP1 PE=1 SV=2	PCBP1_HUMAN	37 kDa	14.086	5.5167	8.0463	9.21633	10.024	9.3068	9.6216	9.6508	8.8821	8.7509	9.7034	9.11213	2.7345	11.471	9.8315	8.01233	0	1.9179	2.6543	1.52407	6.0581	1.8703	1.255	3.06113
Poly(rC)-binding protein 2 OS=Homo sapiens GN=PCBP2 PE=1 SV=1	PCBP2_HUMAN	39 kDa	6.1893	10.912	9.3841	8.82847	9.9549	14.718	11.882	12.185	2.4084	2.452	4.2849	3.04843	1.814	1.5217	7.1505	3.4954	0	0	0.77548	0.258493	0	0.37023	0	0.12341
Poly(rC)-binding protein 3 OS=Homo sapiens GN=PCBP3 PE=2 SV=2	PCBP3_HUMAN	39 kDa	0	0	1.5067	0.502233	0	1.322	1.4767	0.9329	2.1073	0	0	0.702433	0	0	0	0	0	0	0	0	0	0	0	0
Sorting and assembly machinery component 50 homolog OS=Homo sapiens GN=SAMM50 PE=1 SV=3	SAM50_HUMAN	52 kDa	5.4402	6.1442	10.894	7.4928	9.2666	8.8703	9.2888	9.1419	3.6602	6.5019	11.592	7.25137	9.6337	7.3059	7.1736	8.03773	9.7579	9.0763	5.6883	8.17417	11.728	5.7371	7.891	8.45203
B-cell receptor-associated protein 31 OS=Homo sapiens GN=BCAP31 PE=1 SV=3	BAP31_HUMAN	28 kDa	5.2305	10.287	9.1583	8.22527	11.586	11.415	5.4015	9.4675	19.883	16.631	8.4112	14.9751	20.913	15.371	7.8328	14.7056	16.458	12.274	9.8106	12.8475	14.54	9.4984	12.309	12.1158
Hemoglobin subunit alpha OS=Homo sapiens GN=HBA1 PE=1 SV=2	HBA_HUMAN	15 kDa	164	69.63	188.62	140.75	620.27	278.29	160.64	353.067	2.8644	72.174	5.7799	26.9394	9.0282	27.881	5.114	14.0077	72.122	29.935	5.7251	35.9274	76.382	33.232	27.499	45.7043
Serum paraoxonase/arylesterase 2 OS=Homo sapiens GN=PON2 PE=1 SV=3	PON2_HUMAN	39 kDa	5.4256	11.595	19.587	12.2025	11.979	9.2764	36.695	19.3168	12.509	9.8336	8.603	10.3152	8.6579	9.4508	5.9102	8.0063	6.4339	3.9635	5.001	5.1328	13.313	10.621	5.7817	9.90523
Surfeit locus protein 4 OS=Homo sapiens GN=SURF4 PE=1 SV=3	SURF4_HUMAN	30 kDa	11.71	27.094	29.503	22.769	20.616	51.18	19.63	30.4753	3.8063	2.5215	16.663	7.6636	8.3901	4.9253	8.0373	7.11757	3.3171	10.741	7.0909	7.04967	5.7696	6.7683	5.4561	5.998
Pyruvate kinase PKM OS=Homo sapiens GN=PKM PE=1 SV=4	KPYM_HUMAN	58 kDa	17.551	29.149	22.927	23.209	15.82	2.7245	6.9767	8.50707	9.1566	8.0102	6.2056	7.7908	2.8588	2.1639	3.0241	2.68227	12.097	20.118	33.383	21.866	5.0182	5.2493	14.508	8.2585
Nucleolin OS=Homo sapiens GN=NCL PE=1 SV=3	NUCL_HUMAN	77 kDa	27.874	7.7302	16.133	17.2457	5.1789	61.486	17.814	28.1596	18.533	15.771	34.811	23.0383	21.853	26.419	47.29	31.854	1.6003	3.5801	13.052	6.07747	4.8487	6.4288	2.5171	4.5982
Stress-70 protein, mitochondrial OS=Homo sapiens GN=HSPA9 PE=1 SV=2	GRP75_HUMAN	74 kDa	11.242	7.655	5.5181	8.13837	11.234	6.4041	5.1581	7.59873	10.474	8.1698	7.4922	8.712	6.4448	5.789	6.3474	6.19373	13.423	15.728	13.711	14.2873	1.7785	3.7023	4.5349	3.33857
60S ribosomal protein L10a OS=Homo sapiens GN=RPL10A PE=1 SV=2	RL10A_HUMAN	25 kDa	7.5333	6.8659	7.3775	7.2589	7.8976	9.5543	7.0309	8.16093	6.5335	6.6864	7.2268	6.81557	7.2713	5.6455	8.0009	6.97257	4.3063	6.1366	9.7405	6.7278	3.6155	4.5485	1.6734	3.27913
60S ribosomal protein L6 OS=Homo sapiens GN=RPL6 PE=1 SV=3	RL6_HUMAN	33 kDa	7.6115	6.7965	6.0811	6.8297	15.8	17.888	6.8126	13.5002	11.308	6.3415	8.0459	8.56513	7.991	9.282	7.1286	8.13387	5.5917	4.8587	8.95	6.4668	2.4006	4.4824	8.3469	5.07663
Ribosomal L1 domain-containing protein 1 OS=Homo sapiens GN=RSL1D1 PE=1 SV=3	RL1D1_HUMAN	55 kDa	7.2165	8.6533	9.8764	8.58207	8.1726	10.83	8.5519	9.18483	10.766	10.74	6.6748	9.3936	8.0464	9.038	8.3868	8.4904	1.8383	1.5342	9.9817	4.4514	1.1856	2.2214	3.7205	2.37583
Ras-related protein Rab-7a OS=Homo sapiens GN=RAB7A PE=1 SV=1	RAB7A_HUMAN	23 kDa	5.543	6.9553	5.8489	6.11573	4.5364	6.9806	5.0208	5.5126	4.8943	6.1647	9.1411	6.73337	6.0467	4.8695	5.1106	5.34227	6.5461	5.3712	4.2651	5.39413	8.8923	4.4428	6.6936	6.67623
Nucleolar RNA helicase 2 OS=Homo sapiens GN=DDX21 PE=1 SV=5	DDX21_HUMAN	87 kDa	8.7973	10.05	7.1233	8.65687	9.5621	12.895	9.9126	10.7899	10.253	8.5885	5.8048	8.21543	9.0432	8.622	10.306	9.32373	0	0	1.8506	0.616867	0	0	0.42186	0.14062
rRNA 2'-O-methyltransferase fibrillarin OS=Homo sapiens GN=FBL PE=1 SV=2	FBRL_HUMAN	34 kDa	7.3334	5.6268	11.01	7.99007	11.949	9.514	11.481	10.9813	8.5423	6.3799	15.2	10.0407	6.2266	12.238	8.9901	9.15157	1.1057	1.9234	2.4381	1.8224	1.2149	8.2365	1.2656	3.57233
Tricarboxylate transport protein, mitochondrial OS=Homo sapiens GN=SLC25A1 PE=1 SV=2	TXTP_HUMAN	34 kDa	6.826	5.9738	5.377	6.05893	5.412	6.932	6.2739	6.20597	4.4859	5.4887	5.2809	5.08517	5.1473	6.5554	4.6937	5.46547	7.3903	6.7775	3.8891	6.01897	8.9801	6.8227	6.3033	7.3687
Myosin light polypeptide 6 OS=Homo sapiens GN=MYL6 PE=1 SV=2	MYL6_HUMAN	17 kDa	6.0258	5.0161	5.8018	5.61457	5.9635	4.127	8.8243	6.30493	3.4665	3.5454	5.6114	4.20777	5.2364	5.5897	7.3471	6.05773	7.2155	7.1602	3.3017	5.89247	6.421	9.8638	8.3986	8.2278
Calmodulin OS=Homo sapiens GN=CALM1 PE=1 SV=2	CALM_HUMAN	17 kDa	7.9775	5.6447	3.0207	5.54763	3.8373	6.4895	5.5923	5.30637	7.9402	37.784	9.9775	18.5672	12.153	12.432	23.33	15.9717	9.4034	4.4751	9.3094	7.7293	9.8495	7.5208	8.3211	8.5638
Cell division control protein 42 homolog OS=Homo sapiens GN=CDC42 PE=1 SV=2	CDC42_HUMAN	21 kDa	4.8268	16.064	14.394	11.7616	16.442	20.854	7.3504	14.8821	14.086	15.279	21.199	16.8547	22.737	18.948	15.454	19.0463	15.673	10.741	9.3344	11.9161	16.221	10.567	6.1637	10.9839
Stomatin-like protein 2, mitochondrial OS=Homo sapiens GN=STOML2 PE=1 SV=1	STML2_HUMAN	39 kDa	6.2126	4.124	7.0543	5.79697	4.5364	4.6269	7.1714	5.4449	5.1178	4.904	4.4829	4.8349	6.6514	4.8695	6.9474	6.1561	4.5095	5.8835	5.0406	5.14453	3.5569	5.5667	5.8569	4.9935
Heterogeneous nuclear ribonucleoprotein R OS=Homo sapiens GN=HNRNPR PE=1 SV=1	HNRPR_HUMAN	71 kDa	7.6507	19.582	19.35	15.5276	11.142	13.985	28.507	17.878	7.2728	8.7624	9.8375	8.62423	8.075	8.6889	8.3577	8.37387	0	0	6.0276	2.0092	0	0	0	0
60S ribosomal protein L12 OS=Homo sapiens GN=RPL12 PE=1 SV=1	RL12_HUMAN	18 kDa	5.0647	5.9798	6.281	5.77517	6.5205	7.3027	7.8666	7.22993	4.3309	3.1693	7.8632	5.12113	3.7658	5.2408	4.907	4.63787	4.5678	5.4987	6.6033	5.5566	3.9912	6.7553	5.0272	5.2579
Cytochrome b5 OS=Homo sapiens GN=CYB5A PE=1 SV=2	CYB5_HUMAN	15 kDa	5.6573	7.8659	10.4	7.9744	9.4874	8.3252	5.8418	7.8848	4.7272	3.8547	6.1771	4.91967	8.458	9.2325	7.6956	8.46203	13.311	11.762	13.657	12.91	13.718	12.172	18.885	14.925
Dolichyl-diphosphooligosaccharide--protein glycosyltransferase subunit STT3A OS=Homo sapiens GN=STT3A PE=1 SV=2	STT3A_HUMAN	81 kDa	3.8108	6.7092	7.1718	5.89727	17.545	5.6807	7.7642	10.33	7.1445	4.6457	2.637	4.80907	5.0087	6.6909	4.1815	5.2937	10.943	11.507	7.4555	9.9685	7.1138	12.067	13.216	10.7989
Lamina-associated polypeptide 2, isoforms beta/gamma OS=Homo sapiens GN=TMPO PE=1 SV=2	LAP2B_HUMAN	51 kDa	9.6864	5.2282	6.5904	7.16833	10.048	8.5808	5.9594	8.19607	7.8628	5.913	5.3598	6.37853	12.53	12.335	7.1843	10.6831	4.0497	1.5339	4.0974	3.227	3.8271	2.2861	7.884	4.66573
Lamina-associated polypeptide 2, isoform alpha OS=Homo sapiens GN=TMPO PE=1 SV=2	LAP2A_HUMAN	75 kDa	8.1933	1.8915	1.5067	3.86383	2.0352	3.1355	5.1733	3.448	3.5827	0.68255	0.59419	1.61981	3.8691	3.719	3.2931	3.62707	0	0	0	0	0.99779	0	3.3643	1.45403
Very-long-chain (3R)-3-hydroxyacyl-CoA dehydratase 3 OS=Homo sapiens GN=HACD3 PE=1 SV=2	HACD3_HUMAN	43 kDa	7.3187	8.9351	5.7018	7.31853	8.9061	5.2614	10.054	8.07383	4.301	4.9453	3.0377	4.09467	6.1577	6.243	6.5552	6.31863	8.114	12.034	7.7626	9.30353	6.4448	12.833	9.1248	9.46753
Nuclear pore membrane glycoprotein 210 OS=Homo sapiens GN=NUP210 PE=1 SV=3	PO210_HUMAN	205 kDa	4.9182	7.3366	8.4991	6.91797	13.266	10.676	6.1601	10.034	12.173	11.116	9.4968	10.9286	11.77	12.685	14.944	13.133	4.2994	1.5342	2.4065	2.7467	16.833	1.5192	2.4432	6.9318
Myb-binding protein 1A OS=Homo sapiens GN=MYBBP1A PE=1 SV=2	MBB1A_HUMAN	149 kDa	6.6417	7.3724	11.234	8.41603	13.145	10.773	11.147	11.6883	5.2131	1.7064	6.1388	4.35277	9.5313	8.783	7.3375	8.5506	0	4.2031	6.5003	3.5678	0	1.519	1.7644	1.09447
Barrier-to-autointegration factor OS=Homo sapiens GN=BANF1 PE=1 SV=1	BAF_HUMAN	10 kDa	22.305	19.897	48.348	30.1833	9.6665	1.4428	70.674	27.2611	3.544	0.3065	0.85789	1.56946	3.4979	2.4905	2.6437	2.87737	2.2114	23.226	1.363	8.93347	1.6199	83.879	31.867	39.122
LETM1 and EF-hand domain-containing protein 1, mitochondrial OS=Homo sapiens GN=LETM1 PE=1 SV=1	LETM1_HUMAN	83 kDa	6.265	5.9738	5.1301	5.78963	4.3898	3.3049	3.3434	3.67937	6.3696	7.2475	4.75	6.12237	4.6728	5.8718	8.0887	6.2111	8.4803	3.5859	3.0138	5.02667	8.1995	60.607	5.885	24.8972
60S acidic ribosomal protein P0 OS=Homo sapiens GN=RPLP0 PE=1 SV=1	RLA0_HUMAN	34 kDa	5.0647	5.3691	3.6161	4.6833	4.2579	6.4404	5.99	5.56277	4.6707	3.8171	4.5531	4.34697	6.5212	4.6098	4.4151	5.18203	5.6735	4.7313	5.4401	5.28163	5.1768	6.3468	7.1225	6.21537
60S acidic ribosomal protein P0-like OS=Homo sapiens GN=RPLP0P6 PE=5 SV=1	RLA0L_HUMAN	34 kDa	3.5717	4.7347	3.0134	3.77327	3.2858	4.7879	5.3993	4.491	4.0686	2.8976	4.0257	3.66397	5.3463	4.0011	3.8772	4.4082	5.6735	4.7313	5.4401	5.28163	3.9912	5.6063	6.2858	5.29443
Nucleophosmin OS=Homo sapiens GN=NPM1 PE=1 SV=2	NPM_HUMAN	33 kDa	10.272	147.48	69.464	75.7387	38.226	9.8799	63.704	37.27	41.601	37.177	46.864	41.8807	29.988	48.239	47.139	41.7887	30.533	90.771	62.682	61.3287	38.299	37.669	4.5748	26.8476
60S ribosomal protein L9 OS=Homo sapiens GN=RPL9 PE=1 SV=1	RL9_HUMAN (+1)	22 kDa	34.323	22.699	5.0139	20.6786	4.2523	6.4321	7.9436	6.20933	3.8838	5.2518	11.916	7.0172	27.037	23.309	2.9684	17.7715	55.602	2.9409	103.42	53.9876	31.687	80.768	77.905	63.4533
Cation-independent mannose-6-phosphate receptor OS=Homo sapiens GN=IGF2R PE=1 SV=3	MPRI_HUMAN	274 kDa	7.631	12.541	13.807	11.3263	12.793	14.787	5.168	10.916	6.9386	7.5597	7.4243	7.30753	7.0429	4.6274	6.2776	5.98263	13.01	11.635	5.2007	9.94857	9.8788	7.1975	9.4541	8.84347
Filamin-A OS=Homo sapiens GN=FLNA PE=1 SV=4	FLNA_HUMAN	281 kDa	19.104	27.217	31.675	25.9987	20.597	3.3722	13.451	12.4734	13.085	2.5215	3.1273	6.2446	1.0103	2.8586	1.5475	1.80547	3.8048	6.1365	7.399	5.7801	2.0194	18.499	1.2656	7.26133
NADH dehydrogenase [ubiquinone] flavoprotein 1, mitochondrial OS=Homo sapiens GN=NDUFV1 PE=1 SV=4	NDUV1_HUMAN	51 kDa	6.6099	13.696	13.355	11.2203	16.557	13.541	10.649	13.5823	0.6021	2.6259	0.33049	1.18616	12.362	18.594	29.974	20.31	42.425	31.977	29.694	34.6987	25.23	20.067	35.44	26.9123
60S ribosomal protein L7 OS=Homo sapiens GN=RPL7 PE=1 SV=1	RL7_HUMAN	29 kDa	6.143	9.2292	6.8469	7.40637	11.437	10.952	11.328	11.239	15.475	7.8527	12.527	11.9516	5.5378	8.2593	7.3012	7.03277	11.856	5.2421	4.8012	7.29977	1.4028	2.9883	10.864	5.08503
Serine/threonine-protein phosphatase PGAM5, mitochondrial OS=Homo sapiens GN=PGAM5 PE=1 SV=2	PGAM5_HUMAN	32 kDa	5.8306	11.719	6.8991	8.14957	57.722	23.461	17.05	32.7443	14.495	21.383	38.806	24.8947	9.1317	48.654	52.766	36.8506	33.493	18.762	19.343	23.866	4.3997	13.472	14.397	10.7562
Keratin, type I cytoskeletal 23 OS=Homo sapiens GN=KRT23 PE=1 SV=2	K1C23_HUMAN	48 kDa	11.022	17.171	16.968	15.0537	14.08	16.114	13.989	14.7277	50.578	39.602	26.696	38.9587	24.994	19.721	17.442	20.719	0	0	0	0	0	0	0	0
Dehydrogenase/reductase SDR family member 2, mitochondrial OS=Homo sapiens GN=DHRS2 PE=1 SV=4	DHRS2_HUMAN	30 kDa	4.7183	4.0823	5.1918	4.66413	5.4575	4.538	5.1986	5.0647	3.1655	4.1584	4.2226	3.84883	2.1852	3.0657	3.4507	2.90053	11.842	9.7197	7.131	9.56423	6.1453	4.1122	7.5549	5.93747
60S ribosomal protein L18 OS=Homo sapiens GN=RPL18 PE=1 SV=2	RL18_HUMAN	22 kDa	11.966	4.1121	4.767	6.94837	10.963	6.1904	5.104	7.41913	8.638	3.0998	3.6285	5.1221	16.81	11.99	3.4507	10.7502	9.5977	6.2719	12.709	9.5262	12.427	4.5088	5.878	7.6046
Monocarboxylate transporter 4 OS=Homo sapiens GN=SLC16A3 PE=1 SV=1	MOT4_HUMAN	49 kDa	6.1002	6.8191	7.2012	6.70683	13.436	16.349	10.49	13.425	21.061	22.21	9.8227	17.6979	6.8841	10.363	10.148	9.1317	24.055	13.664	9.907	15.8753	7.1759	4.8627	15.246	9.09487
Aldo-keto reductase family 1 member C3 OS=Homo sapiens GN=AKR1C3 PE=1 SV=4	AK1C3_HUMAN	37 kDa	6.0807	5.481	16.417	9.32623	1.3871	1.9572	2.8625	2.06893	2.7869	3.7823	5.8574	4.1422	1.5806	0.61984	1.1316	1.11068	10.297	20.824	18.321	16.4807	0	4.9406	0	1.64687
Aldo-keto reductase family 1 member C1 OS=Homo sapiens GN=AKR1C1 PE=1 SV=1	AK1C1_HUMAN	37 kDa	7.736	7.5893	17.098	10.8078	6.4493	4.7718	1.9765	4.3992	4.0387	2.8628	9.14	5.34717	3.1057	1.9759	2.2042	2.4286	12.135	16.749	19.593	16.159	1.0097	1.5192	0	0.842967
Aldo-keto reductase family 1 member C2 OS=Homo sapiens GN=AKR1C2 PE=1 SV=3	AK1C2_HUMAN	37 kDa	6.9358	5.1924	12.615	8.24773	6.4493	4.7718	1.9765	4.3992	4.7183	2.1803	6.8443	4.58097	3.1057	1.9759	2.2042	2.4286	2.944	5.2421	5.6766	4.6209	1.0097	0	0	0.336567
60S ribosomal protein L19 OS=Homo sapiens GN=RPL19 PE=1 SV=1	RL19_HUMAN	23 kDa	27.401	18.363	16.617	20.7937	24.361	24.401	13.947	20.903	4.6973	1.8631	8.4243	4.9949	9.2246	22.803	28.127	20.0515	10.867	16.222	22.502	16.5303	16.165	15.502	31.954	21.207
Histone H1.5 OS=Homo sapiens GN=HIST1H1B PE=1 SV=3	H15_HUMAN	23 kDa	4.8792	4.4174	3.4382	4.24493	4.9969	6.5209	5.2101	5.57597	5.0105	5.6561	3.6285	4.76503	7.5316	8.34	5.5564	7.14267	9.2521	7.546	6.0158	7.60463	9.0094	6.7699	7.9802	7.91983
NADH dehydrogenase [ubiquinone] 1 alpha subcomplex subunit 9, mitochondrial OS=Homo sapiens GN=NDUFA9 PE=1 SV=2	NDUA9_HUMAN	43 kDa	3.2007	1.8676	4.4576	3.1753	5.6714	3.082	2.7412	3.83153	7.8151	4.4018	4.2296	5.48217	8.6722	7.7712	5.1749	7.2061	1.1057	10.995	9.977	7.35923	7.0431	6.075	8.4232	7.18043
High mobility group protein B2 OS=Homo sapiens GN=HMGB2 PE=1 SV=2	HMGB2_HUMAN	24 kDa	0	1.7744	2.224	1.3328	2.2036	5.6292	5.6059	4.47957	5.2397	2.8309	3.2695	3.78003	2.2877	2.0508	5.3869	3.2418	45.254	26.849	16.348	29.4837	24.976	15.209	29.233	23.1393
Transmembrane 9 superfamily member 4 OS=Homo sapiens GN=TM9SF4 PE=1 SV=2	TM9S4_HUMAN	75 kDa	8.4592	3.654	8.4198	6.84433	10.95	9.4277	2.1834	7.52037	10.11	19.744	9.8798	13.2446	10.73	12.548	7.5794	10.2858	26.575	10.596	13.913	17.028	16.192	7.1617	12.447	11.9336
Transitional endoplasmic reticulum ATPase OS=Homo sapiens GN=VCP PE=1 SV=4	TERA_HUMAN	89 kDa	6.188	6.8896	6.0642	6.3806	6.8901	5.8599	4.1233	5.62443	5.0105	6.506	4.1559	5.22413	7.3767	6.447	6.9997	6.94113	10.585	8.2227	5.4252	8.07763	7.7998	2.9867	6.1368	5.6411
60S ribosomal protein L8 OS=Homo sapiens GN=RPL8 PE=1 SV=2	RL8_HUMAN	28 kDa	8.1712	36.621	30.478	25.0901	1.3871	3.5465	27.205	10.7129	2.9419	1.9781	2.0463	2.3221	1.8485	1.8595	3.4046	2.37087	2.706	17.938	8.9591	9.8677	2.4298	44.586	42.145	29.7203
Dynamin-like 120 kDa protein, mitochondrial OS=Homo sapiens GN=OPA1 PE=1 SV=3	OPA1_HUMAN	112 kDa	4.3327	9.3351	4.9227	6.19683	5.4383	8.6959	1.8667	5.33363	10.736	6.6062	9.7828	9.04167	12.382	7.3585	10.086	9.94217	0.91913	4.4026	2.8941	2.73861	3.6392	1.5265	3.3162	2.8273
Amine oxidase [flavin-containing] B OS=Homo sapiens GN=MAOB PE=1 SV=3	AOFB_HUMAN	59 kDa	4.1327	7.2129	5.6783	5.67463	5.5485	7.8346	5.3622	6.24843	6.7869	7.9124	8.1217	7.607	8.6797	6.8517	9.1282	8.21987	4.3645	5.114	4.1888	4.55577	0.80995	2.6445	3.3679	2.27412
Nicalin OS=Homo sapiens GN=NCLN PE=1 SV=2	NCLN_HUMAN	63 kDa	0.40008	24.13	37.981	20.837	10.245	1.7148	47.382	19.7806	1.0194	1.6716	0.99147	1.22749	0.97589	1.2508	2.9374	1.72136	3.6951	15.248	0.77548	6.57286	4.2376	59.531	31.532	31.7669
Peptidyl-prolyl cis-trans isomerase A OS=Homo sapiens GN=PPIA PE=1 SV=2	PPIA_HUMAN	18 kDa	7.5824	6.9434	7.9656	7.49713	6.7081	6.8917	6.6868	6.7622	4.3309	4.4301	4.2894	4.35013	0.907	1.8595	0.59368	1.12006	2.5312	5.2426	6.5152	4.763	3.9619	2.9751	4.1835	3.70683
Cytochrome b-c1 complex subunit Rieske, mitochondrial OS=Homo sapiens GN=UQCRFS1 PE=1 SV=2	UCRI_HUMAN	30 kDa	5.6648	0.93382	2.3563	2.98497	4.9823	2.394	3.2258	3.53403	22.887	21.699	32.679	25.755	50.794	63.254	45.501	53.183	5.79	5.8815	4.4766	5.3827	34.674	18.594	7.5619	20.2766
Putative cytochrome b-c1 complex subunit Rieske-like protein 1 OS=Homo sapiens GN=UQCRFS1P1 PE=5 SV=1	UCRIL_HUMAN	31 kDa	2.6397	0.93382	1.4523	1.67527	2.8197	2.144	2.3398	2.4345	21.081	19.86	31.097	24.0127	48.98	43.594	40.32	44.298	3.6951	4.4751	4.4766	4.2156	32.895	17.854	6.7252	19.1581
Translocon-associated protein subunit delta OS=Homo sapiens GN=SSR4 PE=1 SV=1	SSRD_HUMAN	19 kDa	4.1863	3.7591	4.7361	4.22717	4.8549	3.5465	2.7412	3.7142	5.9612	4.6388	4.9539	5.18463	3.23	3.719	5.0078	3.9856	6.4011	4.6027	5.164	5.38927	6.421	7.55	6.3103	6.76043
Cytochrome c1, heme protein, mitochondrial OS=Homo sapiens GN=CYC1 PE=1 SV=3	CY1_HUMAN	35 kDa	3.3862	5.9321	5.3226	4.8803	3.6498	3.6271	7.0309	4.76927	2.301	3.3084	4.4265	3.3453	5.9931	4.7102	4.054	4.9191	10.283	8.9493	6.4271	8.55313	5.2354	3.0543	4.2116	4.1671
Neutral amino acid transporter B(0) OS=Homo sapiens GN=SLC1A5 PE=1 SV=2	AAAT_HUMAN	57 kDa	3.1179	4.124	5.7255	4.32247	3.9793	4.0062	3.2488	3.74477	4.5932	4.3953	3.8254	4.2713	3.9992	1.5217	4.0347	3.1852	7.8266	1.7901	3.8774	4.49803	7.7067	7.7748	6.2752	7.25223
60S ribosomal protein L23a OS=Homo sapiens GN=RPL23A PE=1 SV=1	RL23A_HUMAN	18 kDa	3.513	5.5395	4.2731	4.44187	9.8524	12.207	4.3339	8.79777	8.6763	6.3656	4.5652	6.5357	4.4184	7.5052	5.114	5.6792	10.74	7.1593	6.5835	8.16093	5.6056	6.8081	3.7604	5.39137
Transmembrane emp24 domain-containing protein 2 OS=Homo sapiens GN=TMED2 PE=1 SV=1	TMED2_HUMAN	23 kDa	2.9324	3.4598	4.3495	3.58057	5.959	5.0649	5.3146	5.44617	4.4859	5.8648	5.0172	5.12263	5.044	4.3389	3.2931	4.22533	3.2588	7.4154	4.6646	5.11293	7.2017	3.0675	3.3749	4.54803
Ras-related protein Rab-5C OS=Homo sapiens GN=RAB5C PE=1 SV=2	RAB5C_HUMAN	23 kDa	3.2252	3.4717	3.1986	3.2985	3.7008	6.4807	6.3951	5.52553	3.0105	38.675	3.5617	15.0824	31.802	5.4209	2.857	13.36	29.31	3.8373	63.129	32.0921	7.5188	5.9501	4.6124	6.0271
Ras-related protein Rab-5B OS=Homo sapiens GN=RAB5B PE=1 SV=1	RAB5B_HUMAN	24 kDa	0	0	0	0	0.97209	2.3134	0	1.09516	0	1.5325	1.3185	0.950333	1.5117	0	0	0.5039	0	0	0	0	2.9641	2.5916	0	1.8519
Ras-related protein Rab-5A OS=Homo sapiens GN=RAB5A PE=1 SV=2	RAB5A_HUMAN	24 kDa	1.8395	1.8855	1.0892	1.60473	1.1086	3.5062	4.3277	2.98083	0	1.602	4.725	2.109	2.2197	0.631	0	0.950233	0.98916	1.9186	2.7142	1.87399	2.9641	3.3585	2.0953	2.80597
Nucleolar protein 58 OS=Homo sapiens GN=NOP58 PE=1 SV=1	NOP58_HUMAN	60 kDa	6.1185	7.1197	5.965	6.40107	21.381	15.118	6.9072	14.4687	20.494	5.5583	11.457	12.5031	5.1473	7.002	6.5906	6.24663	0	0	3.8891	1.29637	0.40497	0.38344	0	0.262803
Vesicular integral-membrane protein VIP36 OS=Homo sapiens GN=LMAN2 PE=1 SV=1	LMAN2_HUMAN	40 kDa	5.7171	3.1366	6.4185	5.09073	8.8869	5.2766	10.822	8.3285	4.0299	1.602	5.6057	3.74587	4.8721	11.225	13.326	9.8077	34.62	14.727	8.4999	19.2823	20.428	13.99	22.04	18.8193
Mitochondrial import receptor subunit TOM40 homolog OS=Homo sapiens GN=TOMM40 PE=1 SV=1	TOM40_HUMAN	38 kDa	8.4117	4.7108	2.959	5.3605	4.4399	3.1355	5.1872	4.2542	4.9031	1.602	3.1679	3.22433	4.7761	4.981	7.5293	5.76213	4.1315	5.116	1.2631	3.50353	5.6111	4.1518	6.7287	5.4972
U5 small nuclear ribonucleoprotein 200 kDa helicase OS=Homo sapiens GN=SNRNP200 PE=1 SV=2	U520_HUMAN	245 kDa	2.1859	8.3894	11.539	7.37143	54.994	10.675	22.935	29.5347	4.0089	6.3976	5.003	5.1365	8.0532	6.7578	5.8501	6.88703	0	0	1.2032	0.401067	1.0097	0.76689	0.41835	0.731647
NADH-ubiquinone oxidoreductase 75 kDa subunit, mitochondrial OS=Homo sapiens GN=NDUFS1 PE=1 SV=3	NDUS1_HUMAN	79 kDa	53.424	6.2193	2.8884	20.8439	6.4982	6.3889	0.88603	4.59104	38.65	3.7823	25.994	22.8088	32.458	47.761	7.9311	29.3834	121.85	48.774	6.7882	59.1374	15.973	79.102	43.802	46.2923
Sodium/potassium-transporting ATPase subunit beta-1 OS=Homo sapiens GN=ATP1B1 PE=1 SV=1	AT1B1_HUMAN	35 kDa	3.679	3.4657	2.7738	3.30617	4.0703	3.8367	6.1944	4.70047	4.1461	5.3496	4.6867	4.72747	3.1267	4.0234	3.7754	3.64183	6.2263	3.8363	1.9387	4.00043	5.2061	7.1533	6.2928	6.2174
Redox-regulatory protein FAM213A OS=Homo sapiens GN=FAM213A PE=1 SV=3	F213A_HUMAN	26 kDa	4.3718	3.783	2.7121	3.6223	2.9618	4.4172	3.1427	3.50723	5.8749	5.893	4.9469	5.5716	4.6383	3.3812	5.2221	4.41387	3.084	2.4289	2.3264	2.6131	7.7652	5.5799	3.3538	5.5663
Myosin regulatory light chain 12A OS=Homo sapiens GN=MYL12A PE=1 SV=2	ML12A_HUMAN (+1)	20 kDa	1.3858	6.2325	6.2663	4.6282	6.3385	4.6671	6.8241	5.94323	3.6901	1.5325	1.649	2.29053	3.0578	3.6633	3.6082	3.4431	1.9783	9.0778	2.5262	4.52743	2.5884	7.1269	7.9627	5.89267
Translocon-associated protein subunit alpha OS=Homo sapiens GN=SSR1 PE=1 SV=3	SSRA_HUMAN	32 kDa	3.8645	5.3165	1.808	3.663	3.3313	1.9829	2.9534	2.75587	2.4084	5.3631	8.4397	5.40373	4.0681	3.7079	6.1341	4.6367	12.114	4.3476	6.3155	7.59237	7.5893	3.7287	4.6194	5.31247
Signal peptidase complex subunit 2 OS=Homo sapiens GN=SPCS2 PE=1 SV=3	SPCS2_HUMAN	25 kDa	4.9182	4.3112	2.5415	3.92363	3.5133	4.8199	5.5923	4.64183	5.4754	2.3194	3.7655	3.85343	3.9724	4.3835	4.4141	4.25667	9.7182	6.6479	5.0641	7.1434	9.4619	3.3981	6.3139	6.3913
Pre-mRNA-processing-splicing factor 8 OS=Homo sapiens GN=PRPF8 PE=1 SV=2	PRP8_HUMAN	274 kDa	5.8403	7.1078	6.9777	6.64193	4.5309	2.4745	12.613	6.53947	5.4665	6.6799	5.2809	5.8091	7.7038	5.5674	5.6121	6.29443	0	0.38373	1.551	0.64491	0.40497	0.38344	0.84372	0.544043
Cytochrome c oxidase subunit 5A, mitochondrial OS=Homo sapiens GN=COX5A PE=1 SV=2	COX5A_HUMAN	17 kDa	2.0786	1.9034	4.5502	2.84407	3.7463	2.9744	13.213	6.64457	4.2922	3.4758	4.6199	4.1293	5.3119	3.9676	5.2874	4.85563	4.5678	4.3476	3.5895	4.1683	4.0204	6.0221	6.2893	5.44393
High mobility group protein HMGI-C OS=Homo sapiens GN=HMGA2 PE=1 SV=1	HMGA2_HUMAN	12 kDa	3.7863	4.0823	2.5342	3.4676	4.1613	3.9173	4.3011	4.12657	3.8838	3.2389	2.6405	3.2544	3.8691	4.981	4.5919	4.48067	7.4486	6.1366	3.5014	5.69553	5.6696	5.2889	6.3033	5.75393
Choline dehydrogenase, mitochondrial OS=Homo sapiens GN=CHDH PE=1 SV=2	CHDH_HUMAN	65 kDa	14.082	26.558	17.055	19.2317	9.759	13.064	35.412	19.4117	6.2203	2.8763	4.1942	4.43027	4.3285	5.6456	7.9826	5.98557	0	1.5342	1.4313	0.9885	4.4318	12.889	4.2369	7.1859
Flotillin-1 OS=Homo sapiens GN=FLOT1 PE=1 SV=3	FLOT1_HUMAN	47 kDa	8.8557	6.174	10.047	8.3589	6.4469	5.6675	11.17	7.76147	3.2905	6.2961	4.2347	4.6071	5.3254	5.4432	10.126	6.96487	4.9756	4.0904	3.3817	4.14923	2.6003	3.4437	3.7088	3.25093
Transmembrane emp24 domain-containing protein 9 OS=Homo sapiens GN=TMED9 PE=1 SV=2	TMED9_HUMAN	27 kDa	2.5324	4.4234	4.6737	3.8765	2.7742	3.0549	3.438	3.08903	3.845	3.7823	3.4315	3.68627	5.8821	2.4571	4.7956	4.37827	33.917	36.384	43.648	37.983	125.75	56.036	85.163	88.983
Protein transport protein Sec61 subunit alpha isoform 1 OS=Homo sapiens GN=SEC61A1 PE=1 SV=2	S61A1_HUMAN	52 kDa	3.6253	5.3691	4.2261	4.40683	4.0703	3.4257	2.7412	3.4124	3.8063	3.8171	3.0343	3.55257	1.814	3.088	3.7196	2.87387	8.8158	5.3712	4.0771	6.08803	5.0182	6.003	4.1975	5.0729
Protein transport protein Sec61 subunit alpha isoform 2 OS=Homo sapiens GN=SEC61A2 PE=2 SV=3	S61A2_HUMAN	52 kDa	0	0	1.5067	0.502233	0	1.322	0	0.440667	0	0	0	0	0	0	0	0	0	1.5349	0	0.511633	0	1.8512	0	0.617067
Protein FAM162A OS=Homo sapiens GN=FAM162A PE=1 SV=2	F162A_HUMAN	17 kDa	1.1466	0.93978	5.3872	2.49119	16.142	7.6468	5.168	9.65227	10.5	4.809	7.3478	7.55227	9.0627	9.4126	9.3696	9.28163	8.8319	5.3699	5.7849	6.66223	4.4254	3.3981	7.8288	5.21743
Catechol O-methyltransferase OS=Homo sapiens GN=COMT PE=1 SV=2	COMT_HUMAN	30 kDa	12.061	8.8117	10.17	10.3476	3.6862	5.087	13.241	7.33807	2.5634	3.2737	2.3768	2.73797	3.4979	2.1973	8.5026	4.7326	0.49458	5.7529	3.6013	3.28293	3.1812	9.4895	5.3927	6.02113
H/ACA ribonucleoprotein complex subunit 4 OS=Homo sapiens GN=DKC1 PE=1 SV=3	DKC1_HUMAN	58 kDa	12.965	8.6074	8.6857	10.086	16.421	14.754	14.882	15.3523	6.113	5.0701	10.367	7.18337	14.182	13.18	14.82	14.0607	0	1.5342	11.838	4.4574	0	0	1.6288	0.542933
60S ribosomal protein L27 OS=Homo sapiens GN=RPL27 PE=1 SV=2	RL27_HUMAN	16 kDa	9.1167	6.9848	6.1516	7.4177	11.975	14.86	7.6352	11.4901	2.7958	1.9781	6.1737	3.6492	5.1264	4.1844	4.4291	4.57997	1.9083	1.9179	3.3101	2.37877	5.0301	4.5412	5.4115	4.99427
Glyceraldehyde-3-phosphate dehydrogenase OS=Homo sapiens GN=GAPDH PE=1 SV=3	G3P_HUMAN	36 kDa	6.4113	3.1485	4.8288	4.7962	3.6553	3.4257	4.218	3.76633	3.7675	37.449	30.214	23.8102	2.5564	25.102	2.4101	10.0228	2.0949	4.9874	9.9376	5.6733	3.1812	8.6256	5.0413	5.61603
RNA-binding protein Raly OS=Homo sapiens GN=RALY PE=1 SV=1	RALY_HUMAN	32 kDa	6.1577	5.9917	6.0958	6.08173	7.296	5.5295	5.5886	6.13803	3.7675	4.1236	3.6952	3.8621	4.7072	5.2408	4.907	4.95167	0	0	4.0771	1.35903	1.2149	0	0	0.404967
Nodal modulator 2 OS=Homo sapiens GN=NOMO2 PE=1 SV=1	NOMO2_HUMAN (+1)	139 kDa	5.2572	7.9997	4.4421	5.89967	10.499	7.6927	4.3667	7.51947	6.0238	2.2285	8.9517	5.73467	9.8397	11.88	8.1527	9.95747	9.0287	9.0618	3.8501	7.31353	9.7661	8.3004	13.949	10.6718
Transmembrane emp24 domain-containing protein 7 OS=Homo sapiens GN=TMED7 PE=1 SV=2	TMED7_HUMAN	25 kDa	12.282	4.9457	4.5964	7.2747	5.4064	3.216	3.4151	4.0125	86.243	42.708	5.7262	44.8924	1.2782	2.2388	5.9936	3.1702	30.533	48.263	3.2818	27.3593	2.6177	2.2742	36.824	13.9053
40S ribosomal protein S7 OS=Homo sapiens GN=RPS7 PE=1 SV=1	RS7_HUMAN	22 kDa	8.8996	3.1247	4.3113	5.4452	1.3871	15.035	4.8185	7.0802	6.1461	5.8193	1.4521	4.4725	2.2197	2.5017	5.4236	3.38167	4.0614	9.7166	5.2521	6.34337	2.4298	4.951	5.8955	4.42543
NADH dehydrogenase [ubiquinone] 1 beta subcomplex subunit 7 OS=Homo sapiens GN=NDUFB7 PE=1 SV=4	NDUB7_HUMAN	16 kDa	9.0104	38.79	6.0017	17.934	33.734	36.887	5.4314	25.3508	2.7332	13.547	34.93	17.0701	35.562	28.88	30.828	31.7567	54.629	27.375	21.379	34.461	34.535	21.109	17.644	24.4293
Guanine nucleotide-binding protein G(i) subunit alpha-2 OS=Homo sapiens GN=GNAI2 PE=1 SV=3	GNAI2_HUMAN	40 kDa	4.9865	3.7532	6.0414	4.92703	4.9914	6.4723	5.1757	5.54647	4.2623	3.991	4.0292	4.09417	4.5427	3.4482	4.323	4.10463	3.1423	0.38373	1.2631	1.59638	3.6155	2.3007	3.7897	3.2353
Guanine nucleotide-binding protein G(k) subunit alpha OS=Homo sapiens GN=GNAI3 PE=1 SV=3	GNAI3_HUMAN	41 kDa	4.5864	3.4419	3.6234	3.8839	3.2348	4.6991	4.6911	4.20833	4.2623	3.6497	1.9829	3.2983	3.5323	3.4482	4.054	3.67817	3.1423	0	2.2383	1.79353	2.8348	2.6841	4.2186	3.24583
Guanine nucleotide-binding protein G(i) subunit alpha-1 OS=Homo sapiens GN=GNAI1 PE=1 SV=2	GNAI1_HUMAN	40 kDa	0	0	0	0	2.9562	0	0	0.9854	0	0	0	0	0	0	0	0	0	0	0	0	0	0	0	0
Cytochrome c oxidase subunit 5B, mitochondrial OS=Homo sapiens GN=COX5B PE=1 SV=2	COX5B_HUMAN	14 kDa	4.7719	4.4174	2.6576	3.94897	4.1613	4.2075	3.5212	3.96333	4.4471	4.2627	2.9042	3.87133	3.23	3.1104	3.2931	3.21117	3.4621	5.8825	5.0524	4.799	5.0182	5.6195	2.9284	4.52203
Protein RRP5 homolog OS=Homo sapiens GN=PDCD11 PE=1 SV=3	RRP5_HUMAN	209 kDa	3.7863	12.865	8.0595	8.23693	26.985	29.073	6.3969	20.8183	8.7449	7.9329	6.1737	7.61717	9.8607	11.305	13.768	11.6446	0	0	0	0	0	0	0	0
Unconventional myosin-Ic OS=Homo sapiens GN=MYO1C PE=1 SV=4	MYO1C_HUMAN	122 kDa	6.9661	3.9712	10.442	7.12643	12.381	11.968	1.2973	8.54877	28.047	31.587	24.472	28.0353	17.883	17.94	15.198	17.007	18.958	7.7827	5.1058	10.6155	7.9894	3.4214	7.3437	6.2515
ATP synthase-coupling factor 6, mitochondrial OS=Homo sapiens GN=ATP5J PE=1 SV=1	ATP5J_HUMAN	13 kDa	1.493	2.5259	2.959	2.32597	2.8197	4.4977	3.7219	3.67977	5.8063	4.4996	3.6952	4.66703	3.3946	4.6544	4.4805	4.1765	3.5786	3.325	2.6261	3.17657	8.1702	4.8923	4.1905	5.751
60S ribosomal protein L30 OS=Homo sapiens GN=RPL30 PE=1 SV=2	RL30_HUMAN	13 kDa	1.3858	6.9094	6.2148	4.83667	7.8749	7.208	6.7934	7.2921	10.083	5.9896	6.3073	7.45997	7.4342	6.2655	5.114	6.27123	7.9177	4.3471	7.4075	6.55743	2.9934	2.2478	5.3493	3.53017
Band 4.1-like protein 2 OS=Homo sapiens GN=EPB41L2 PE=1 SV=1	E41L2_HUMAN	113 kDa	5.4451	13.469	16.715	11.8764	29.936	28.287	12.817	23.68	7.5407	11.678	12.001	10.4066	23.524	27.817	20.197	23.846	0	1.8459	3.7903	1.87873	1.9973	2.271	1.7644	2.0109
AFG3-like protein 2 OS=Homo sapiens GN=AFG3L2 PE=1 SV=2	AFG32_HUMAN	89 kDa	3.2789	14.41	6.8929	8.19393	5.1289	3.1758	8.2156	5.50677	4.7094	5.7256	5.8716	5.43553	2.2197	4.6432	8.3824	5.08177	2.706	13.581	2.111	6.13267	4.989	1.8908	7.9042	4.928
Glypican-3 OS=Homo sapiens GN=GPC3 PE=1 SV=1	GPC3_HUMAN	66 kDa	5.6648	6.0748	3.3382	5.02593	6.3604	7.6774	6.9072	6.98167	6.3188	8.194	6.7679	7.09357	9.7437	8.9663	8.4628	9.0576	0	0	0	0	0	0	0	0
Protein disulfide-isomerase A4 OS=Homo sapiens GN=PDIA4 PE=1 SV=2	PDIA4_HUMAN	73 kDa	12.351	16.963	12.686	14	7.3591	3.9144	3.173	4.8155	18.283	21.86	19.988	20.0437	7.1877	8.4304	1.6662	5.76143	18.862	15.678	5.9644	13.5015	3.9947	12.055	9.5229	8.5242
Importin subunit beta-1 OS=Homo sapiens GN=KPNB1 PE=1 SV=2	IMB1_HUMAN	97 kDa	6.5881	5.2975	9.5031	7.12957	7.5078	9.3673	9.1333	8.66947	17.621	4.1129	7.2427	9.65887	2.2742	3.2413	3.4303	2.98193	0.55285	5.2257	7.2843	4.35428	0	8.3533	0.42186	2.92505
Peroxiredoxin-2 OS=Homo sapiens GN=PRDX2 PE=1 SV=5	PRDX2_HUMAN	22 kDa	4.1327	4.9814	6.3442	5.15277	3.7463	2.3537	2.942	3.014	8.5246	6.443	3.6952	6.22093	9.4213	8.0802	6.0837	7.86173	1.9783	6.1376	4.7645	4.29347	2.8055	1.8908	3.7827	2.82633
Splicing factor U2AF 65 kDa subunit OS=Homo sapiens GN=U2AF2 PE=1 SV=4	U2AF2_HUMAN	54 kDa	37.796	7.1411	18.155	21.0307	12.515	27.401	26.97	22.2953	0.67958	16.313	30.585	15.8592	45.686	45.889	23.652	38.409	0	0	29.041	9.68033	0	0	0	0
Large neutral amino acids transporter small subunit 1 OS=Homo sapiens GN=SLC7A5 PE=1 SV=2	LAT1_HUMAN	55 kDa	4.1522	4.6702	2.1711	3.6645	3.1802	4.4796	5.3474	4.33573	7.2607	4.0782	4.669	5.33597	4.0127	4.4441	4.0797	4.17883	5.9815	6.0099	4.7329	5.57477	3.1812	2.9883	5.4526	3.87403
Malectin OS=Homo sapiens GN=MLEC PE=1 SV=1	MLEC_HUMAN	32 kDa	1.9468	6.9441	4.8228	4.57123	5.7078	7.6947	2.1834	5.1953	12.333	10.164	5.9768	9.49127	3.1401	8.0231	7.9089	6.35737	7.6679	3.7079	4.4851	5.28697	10.278	3.7934	4.5231	6.19817
40S ribosomal protein S5 OS=Homo sapiens GN=RPS5 PE=1 SV=4	RS5_HUMAN	23 kDa	3.2252	3.1664	3.4382	3.2766	5.9235	4.0464	4.6194	4.8631	2.7869	3.441	3.8922	3.37337	2.721	2.1416	3.9886	2.9504	2.2114	4.6027	3.5895	3.46787	6.3625	4.4824	2.1093	4.31807
Tyrosine-protein phosphatase non-receptor type 1 OS=Homo sapiens GN=PTPN1 PE=1 SV=1	PTN1_HUMAN	50 kDa	6.0769	11.406	4.2025	7.22847	12.054	24.485	5.9683	14.1691	14.119	5.4461	5.91	8.4917	10.766	11.37	14.158	12.098	16.1	3.0683	5.2215	8.12993	6.0361	1.5192	10.209	5.92143
Delta-1-pyrroline-5-carboxylate dehydrogenase, mitochondrial OS=Homo sapiens GN=ALDH4A1 PE=1 SV=3	AL4A1_HUMAN	62 kDa	7.6785	11.272	11.904	10.2848	10.302	16.245	3.7637	10.1036	4.3963	11.676	9.4421	8.5048	6.156	3.9741	9.1385	6.42287	18.837	16.988	15.045	16.9567	8.0334	6.8364	9.6614	8.17707
Cytochrome b-c1 complex subunit 6, mitochondrial OS=Homo sapiens GN=UQCRH PE=1 SV=2	QCR6_HUMAN	11 kDa	5.8111	4.4826	9.0716	6.4551	1.8476	1.1123	11.964	4.97463	1.0194	0.68255	2.1798	1.29392	0.33678	1.2397	1.5678	1.04809	16.068	6.3918	12.226	11.5619	11.717	12.552	18.871	14.38
Cofilin-1 OS=Homo sapiens GN=CFL1 PE=1 SV=3	COF1_HUMAN	19 kDa	4.6059	23.577	11.691	13.2913	2.8516	8.0051	4.3147	5.05713	7.5883	12.814	12.301	10.9011	3.8129	3.7224	2.7392	3.42483	8.3422	8.6941	7.276	8.1041	0.59282	3.4246	7.4656	3.82767
GTP-binding nuclear protein Ran OS=Homo sapiens GN=RAN PE=1 SV=3	RAN_HUMAN	24 kDa	3.6253	3.783	3.9247	3.77767	2.5922	2.3134	2.7527	2.55277	2.7869	3.441	3.0343	3.0874	6.3837	4.7518	3.0702	4.73523	13.739	9.6301	7.4638	10.2776	5.9575	2.9883	6.8825	5.2761
Serine/threonine-protein phosphatase PP1-gamma catalytic subunit OS=Homo sapiens GN=PPP1CC PE=1 SV=1	PP1G_HUMAN	37 kDa	6.1708	5.6387	5.4387	5.7494	6.333	4.9087	5.6718	5.63783	1.5052	2.4868	3.3682	2.4534	5.4841	3.1327	3.7754	4.13073	8.4014	0.76745	3.6013	4.25672	2.4006	1.9172	0	1.43927
Serine/threonine-protein phosphatase PP1-beta catalytic subunit OS=Homo sapiens GN=PPP1CB PE=1 SV=3	PP1B_HUMAN	37 kDa	2.6933	5.3274	4.7126	4.24443	5.9635	4.538	4.5018	5.0011	1.845	3.1693	3.0377	2.684	5.4841	3.1327	3.7754	4.13073	0.55285	0.76745	2.6261	1.31547	2.8055	1.9172	0	1.57423
RNA-binding motif protein, X chromosome OS=Homo sapiens GN=RBMX PE=1 SV=3	RBMX_HUMAN	42 kDa	3.2252	4.0417	3.4999	3.58893	3.0073	5.0782	4.6079	4.23113	12.048	7.2851	6.5675	8.63353	8.6435	6.7132	5.1246	6.8271	0	0	7.2077	2.40257	0	0	0.8367	0.2789
RNA binding motif protein, X-linked-like-1 OS=Homo sapiens GN=RBMXL1 PE=1 SV=1	RMXL1_HUMAN	42 kDa	1.7322	2.7846	2.4107	2.30917	1.9897	2.9744	2.8473	2.6038	13.499	5.6135	5.3791	8.16387	6.6918	5.4735	3.9373	5.36753	0	0	5.8447	1.94823	0	0	0	0
60S ribosomal protein L17 OS=Homo sapiens GN=RPL17 PE=1 SV=3	RL17_HUMAN	21 kDa	12.81	8.2239	5.3093	8.78107	3.3212	3.4527	0.29534	2.35641	5.7764	1.3651	2.9567	3.36607	1.6494	1.5775	6.2626	3.16317	3.2006	4.219	5.7882	4.4026	0.40497	12.544	17.337	10.0953
60S ribosomal protein L18a OS=Homo sapiens GN=RPL18A PE=1 SV=2	RL18A_HUMAN	21 kDa	4.4558	3.7125	5.0859	4.41807	8.7449	9.0139	2.668	6.80893	5.2607	1.6368	2.6667	3.18807	5.0021	4.6051	3.5665	4.39123	4.3645	10.484	6.0445	6.96433	6.8442	7.9748	6.5961	7.13837
Vesicle-trafficking protein SEC22b OS=Homo sapiens GN=SEC22B PE=1 SV=4	SC22B_HUMAN	25 kDa	4.1573	3.4896	3.9644	3.87043	1.6201	3.6354	5.1368	3.4641	1.5052	4.0888	3.6285	3.07417	3.3257	2.1304	3.6082	3.02143	4.4512	1.9186	2.7142	3.028	4.9597	6.3203	4.1835	5.1545
Aldehyde dehydrogenase X, mitochondrial OS=Homo sapiens GN=ALDH1B1 PE=1 SV=3	AL1B1_HUMAN	57 kDa	2.1323	1.8855	3.2603	2.42603	2.6832	2.0635	2.552	2.4329	5.3115	6.3386	4.2226	5.2909	4.7417	3.4147	3.8311	3.99583	0	1.6625	2.6261	1.42953	0	0	0	0
Aldehyde dehydrogenase, mitochondrial OS=Homo sapiens GN=ALDH2 PE=1 SV=2	ALDH2_HUMAN	56 kDa	0.34644	0	0.30134	0.215927	0.64806	0.33049	0	0.326183	1.5052	2.7585	1.0548	1.77283	0.60467	0.60869	0.53796	0.583773	0	1.1512	1.1632	0.771467	0	0	0	0
60S ribosomal protein L23 OS=Homo sapiens GN=RPL23 PE=1 SV=1	RL23_HUMAN	15 kDa	7.0127	5.2461	3.0369	5.09857	2.2682	8.8182	4.0287	5.03837	5.1057	4.9522	6.1833	5.41373	5.7923	5.1165	6.8292	5.91267	2.8274	3.0691	1.9787	2.62507	2.3713	2.6048	2.9284	2.63483
40S ribosomal protein S9 OS=Homo sapiens GN=RPS9 PE=1 SV=3	RS9_HUMAN	23 kDa	7.0115	3.1306	1.6302	3.9241	3.8373	3.1758	5.0668	4.02663	3.9225	5.83	4.8168	4.85643	3.1267	2.4682	2.3747	2.65653	5.8483	3.1974	4.2769	4.44087	1.6199	3.7684	1.2586	2.21563
Integrin alpha-V OS=Homo sapiens GN=ITGAV PE=1 SV=2	ITAV_HUMAN	116 kDa	4.4791	10.521	6.7308	7.24363	7.6201	8.2982	4.83	6.9161	5.5528	5.0566	3.9447	4.85137	4.1571	5.1915	4.7645	4.70437	0	0.38373	0	0.12791	0	0	0.42186	0.14062
Acyl carrier protein, mitochondrial OS=Homo sapiens GN=NDUFAB1 PE=1 SV=3	ACPM_HUMAN	17 kDa	2.6933	3.4359	3.0824	3.07053	2.9562	2.8855	3.2258	3.0225	3.6602	3.4128	3.9624	3.67847	2.3574	4.3947	2.8463	3.19947	3.8117	3.324	3.2136	3.44977	3.6448	5.712	5.0518	4.80287
Intercellular adhesion molecule 1 OS=Homo sapiens GN=ICAM1 PE=1 SV=2	ICAM1_HUMAN	58 kDa	3.8108	3.4896	2.4107	3.23703	1.6201	2.394	1.4767	1.83027	3.3115	4.291	4.2192	3.94057	5.2086	4.8806	4.1461	4.7451	1.9783	1.9186	1.1632	1.6867	3.5569	5.5667	4.1835	4.4357
RNA cytidine acetyltransferase OS=Homo sapiens GN=NAT10 PE=1 SV=2	NAT10_HUMAN	116 kDa	3.2789	10.625	11.781	8.56163	4.9802	3.466	8.0777	5.50797	6.3398	6.3415	5.8968	6.1927	5.023	5.7621	5.6475	5.47753	0.49458	0	2.6543	1.04963	0	1.876	1.6734	1.18313
NADH dehydrogenase [ubiquinone] iron-sulfur protein 3, mitochondrial OS=Homo sapiens GN=NDUFS3 PE=1 SV=1	NDUS3_HUMAN	30 kDa	0.69288	1.257	2.1167	1.35553	4.0703	2.3134	3.438	3.2739	1.5052	2.1455	1.8459	1.8322	4.0681	3.0546	2.6898	3.27083	4.9223	8.311	6.6834	6.6389	11.129	6.4042	5.4596	7.66427
Apoptosis-inducing factor 1, mitochondrial OS=Homo sapiens GN=AIFM1 PE=1 SV=1	AIFM1_HUMAN	67 kDa	5.172	3.4598	4.767	4.46627	4.1613	4.8685	4.9033	4.64437	4.7094	4.5344	3.4315	4.2251	3.3946	6.7848	4.0443	4.74123	0	0	1.7507	0.583567	0	0.37023	2.9045	1.09158
ER membrane protein complex subunit 1 OS=Homo sapiens GN=EMC1 PE=1 SV=1	EMC1_HUMAN	112 kDa	5.8647	11.056	5.0918	7.3375	22.05	7.4044	10.145	13.1998	10.926	1.8873	4.3506	5.7213	4.7887	15.153	7.6399	9.19387	1.4137	4.0907	3.182	2.89547	15.867	8.3562	7.4105	10.5446
60S ribosomal protein L13 OS=Homo sapiens GN=RPL13 PE=1 SV=4	RL13_HUMAN	24 kDa	4.5037	7.2375	9.4815	7.07423	13.255	9.2818	7.3092	9.94867	2.4084	1.226	2.3733	2.00257	2.1163	2.7391	3.2278	2.6944	1.9783	8.4562	5.6007	5.34507	1.7785	2.9618	6.2442	3.6615
Neutral cholesterol ester hydrolase 1 OS=Homo sapiens GN=NCEH1 PE=1 SV=3	NCEH1_HUMAN	46 kDa	4.1327	4.911	3.7468	4.2635	4.5764	3.7562	5.1872	4.5066	3.7675	4.1932	5.6782	4.5463	5.7176	3.4035	4.8513	4.65747	0	1.2788	1.363	0.8806	1.9956	0.76689	0	0.92083
60S ribosomal protein L35 OS=Homo sapiens GN=RPL35 PE=1 SV=2	RL35_HUMAN	15 kDa	2.7482	12.653	5.6882	7.0298	24.173	15.627	1.7934	13.8645	7.9967	2.8763	3.1536	4.67553	4.6308	4.6577	5.2327	4.8404	6.1377	14.731	20.753	13.8739	22.885	2.2597	15.212	13.4522
Ribosome biogenesis protein BRX1 homolog OS=Homo sapiens GN=BRIX1 PE=1 SV=2	BRX1_HUMAN	41 kDa	16.633	10.291	9.3729	12.099	37.78	24.366	13.684	25.2767	10.134	9.5642	8.6115	9.43657	7.1598	5.6602	11.368	8.06267	0.91913	1.5342	9.7908	4.08138	0	1.5192	1.6288	1.04933
Eukaryotic translation initiation factor 6 OS=Homo sapiens GN=EIF6 PE=1 SV=1	IF6_HUMAN	27 kDa	3.4983	6.5802	4.398	4.8255	4.7312	4.4211	4.9054	4.6859	5.2994	15.687	16.849	12.6118	9.8999	7.6215	5.0379	7.51977	5.5148	2.3012	5.8447	4.55357	4.0387	3.0384	3.2576	3.4449
60S ribosomal protein L13a OS=Homo sapiens GN=RPL13A PE=1 SV=2	RL13A_HUMAN	24 kDa	3.8645	2.8432	5.2462	3.98463	4.3489	3.3452	3.6387	3.7776	2.4084	2.452	2.7038	2.5214	3.3257	2.7614	3.7657	3.28427	2.5894	1.6625	4.8526	3.03483	0	2.9883	4.194	2.3941
Transducin beta-like protein 2 OS=Homo sapiens GN=TBL2 PE=1 SV=1	TBL2_HUMAN	50 kDa	1.8931	5.1231	6.2765	4.4309	8.6483	7.5385	4.166	6.78427	3.6303	3.2524	5.8695	4.25073	6.067	7.1259	4.7335	5.97547	3.084	4.9862	4.0856	4.05193	6.2103	3.0074	4.5678	4.59517
High mobility group protein HMG-I/HMG-Y OS=Homo sapiens GN=HMGA1 PE=1 SV=3	HMGA1_HUMAN	12 kDa	2.9861	2.514	1.6302	2.37677	2.4502	2.8855	3.2258	2.85383	2.6408	3.3084	2.1131	2.68743	5.4287	3.4147	3.2931	4.0455	7.5068	48.902	1.1632	19.1907	5.2646	3.4378	5.0553	4.5859
Tyrosine-protein kinase BAZ1B OS=Homo sapiens GN=BAZ1B PE=1 SV=2	BAZ1B_HUMAN	171 kDa	7.5882	2.7082	5.2146	5.17033	12.464	6.661	22.768	13.9643	19.812	15.949	14.27	16.677	20.937	13.433	10.901	15.0903	5.7067	5.2259	5.4337	5.45543	13.399	5.3094	14.955	11.2211
Sodium-coupled neutral amino acid transporter 2 OS=Homo sapiens GN=SLC38A2 PE=1 SV=2	S38A2_HUMAN	56 kDa	8.1738	6.1859	6.2663	6.87533	2.3592	5.1808	2.2567	3.26557	3.5827	3.9214	5.4145	4.3062	1.3127	1.2508	0.64941	1.07097	10.642	7.0329	5.7082	7.79437	0	1.1298	0	0.3766
Hypoxia up-regulated protein 1 OS=Homo sapiens GN=HYOU1 PE=1 SV=1	HYOU1_HUMAN	111 kDa	10.471	8.1289	9.1635	9.25447	0	0	1.2973	0.432433	2.9419	4.5344	3.5617	3.67933	0	0	0.3247	0.108233	5.2954	8.6951	6.7032	6.8979	0.59282	0.76689	1.2656	0.875103
NADH dehydrogenase [ubiquinone] 1 alpha subcomplex subunit 10, mitochondrial OS=Homo sapiens GN=NDUFA10 PE=1 SV=1	NDUAA_HUMAN	41 kDa	12.678	5.2795	8.4257	8.7944	7.7321	21.86	7.5159	12.3693	0.98063	4.3557	17.008	7.44811	1.5806	24.094	17.102	14.2589	0.55285	7.7114	21.852	10.0388	22.564	8.7303	13.613	14.9691
Signal recognition particle receptor subunit beta OS=Homo sapiens GN=SRPRB PE=1 SV=3	SRPRB_HUMAN	30 kDa	0.80017	2.2028	0.72614	1.24304	2.7742	3.5465	2.4459	2.9222	1.5052	3.3084	2.5103	2.4413	2.2541	3.7302	3.4507	3.145	7.2155	5.2436	7.4904	6.64983	4.9835	5.1832	5.4385	5.20173
60S ribosomal protein L21 OS=Homo sapiens GN=RPL21 PE=1 SV=2	RL21_HUMAN	19 kDa	10.167	4.0405	2.8274	5.6783	8.4779	10.066	2.3398	6.96123	3.3204	4.0258	2.8408	3.39567	4.646	2.8921	1.9482	3.1621	1.1057	4.4744	8.7471	4.77573	2.0249	9.505	3.7674	5.0991
KH domain-containing, RNA-binding, signal transduction-associated protein 1 OS=Homo sapiens GN=KHDRBS1 PE=1 SV=1	KHDR1_HUMAN	48 kDa	22.972	7.2028	5.8503	12.0084	13.117	20.026	8.4548	13.8659	1.6989	0.68255	8.2274	3.53628	10.003	5.4051	7.0666	7.49157	2.7574	0	7.2477	3.33503	0	0	2.8944	0.9648
Lamin-B receptor OS=Homo sapiens GN=LBR PE=1 SV=2	LBR_HUMAN	71 kDa	2.5324	2.8432	2.8355	2.73703	4.0248	3.466	4.218	3.90293	2.1848	2.1803	3.4315	2.59887	3.9992	1.8484	2.857	2.90153	4.5678	2.3024	2.7142	3.1948	5.7696	2.9883	2.939	3.89897
Nuclear pore complex protein Nup155 OS=Homo sapiens GN=NUP155 PE=1 SV=1	NU155_HUMAN	155 kDa	15.587	8.1186	12.027	11.9109	11.322	7.3546	15.004	11.2269	7.3591	0.613	8.4374	5.46983	11.273	15.33	16.418	14.3403	11.317	8.2942	4.0024	7.8712	7.6339	2.6547	6.2875	5.52537
Thioredoxin-related transmembrane protein 1 OS=Homo sapiens GN=TMX1 PE=1 SV=1	TMX1_HUMAN	32 kDa	2.0553	3.7411	4.9434	3.57993	6.9532	5.6474	1.1814	4.594	36.736	25.083	16.347	26.0553	15.282	11.334	9.1381	11.918	20.963	10.836	11.231	14.3433	11.984	6.4064	11.346	9.91213
Perilipin-2 OS=Homo sapiens GN=PLIN2 PE=1 SV=2	PLIN2_HUMAN	48 kDa	2.3322	1.7744	3.1309	2.4125	6.7618	8.7082	4.0927	6.5209	0.64084	1.2501	0	0.630313	16.214	13.09	8.1575	12.4872	4.3577	7.9267	9.095	7.12647	9.0752	3.0384	4.8863	5.66663
Unconventional myosin-Ib OS=Homo sapiens GN=MYO1B PE=1 SV=3	MYO1B_HUMAN	132 kDa	4.1717	6.3037	7.2275	5.90097	10.903	12.101	5.7067	9.57023	3.4931	2.8068	4.1011	3.467	7.8256	3.9741	5.5405	5.78007	4.5957	4.6025	5.497	4.8984	2.4243	3.798	4.4938	3.57203
Estradiol 17-beta-dehydrogenase 11 OS=Homo sapiens GN=HSD17B11 PE=1 SV=3	DHB11_HUMAN	33 kDa	5.5184	3.7651	3.1986	4.1607	4.1613	3.1355	3.9112	3.736	5.7913	11.107	5.2763	7.39153	1.2093	5.206	8.9006	5.1053	3.4503	0	1.1632	1.53783	4.3669	2.2478	1.2621	2.6256
60S ribosomal protein L32 OS=Homo sapiens GN=RPL32 PE=1 SV=2	RL32_HUMAN	16 kDa	12.061	5.1924	6.1575	7.80363	11.424	15.208	5.8418	10.8246	3.1057	2.9111	6.3872	4.13467	2.1987	8.9494	8.2962	6.48143	4.3954	10.14	2.1469	5.56077	2.0249	2.3007	4.2627	2.86277
60S ribosomal protein L5 OS=Homo sapiens GN=RPL5 PE=1 SV=3	RL5_HUMAN	34 kDa	5.8403	10.266	6.8822	7.66283	8.5845	5.1906	4.4904	6.0885	5.0194	2.2846	1.9829	3.09563	3.6701	2.524	3.7293	3.3078	0	0	3.8817	1.2939	0	0.38344	0	0.127813
Prolactin regulatory element-binding protein OS=Homo sapiens GN=PREB PE=1 SV=2	PREB_HUMAN	45 kDa	5.4256	6.9322	3.4308	5.26287	3.6407	3.5686	3.6699	3.6264	3.067	3.9349	3.2204	3.40743	3.6004	4.237	4.5406	4.126	10.008	5.881	4.813	6.90067	4.0497	2.2874	5.3669	3.90133
Single-stranded DNA-binding protein, mitochondrial OS=Homo sapiens GN=SSBP1 PE=1 SV=1	SSBP_HUMAN	17 kDa	4.5182	3.4776	3.8013	3.93237	3.7008	3.3452	4.714	3.92	3.2817	10.108	7.1868	6.85883	1.8829	4.076	6.8393	4.26607	3.5786	2.5575	1.1632	2.4331	2.1834	1.1371	2.5171	1.94587
Histone H1.0 OS=Homo sapiens GN=H1F0 PE=1 SV=3	H10_HUMAN	21 kDa	2.7715	2.8491	2.7121	2.77757	1.6201	1.6525	3.3434	2.20533	3.6901	2.828	1.9795	2.83253	4.0337	3.6744	3.3392	3.68243	4.0149	5.6273	1.1632	3.6018	5.3647	2.6048	1.6734	3.2143
Long-chain-fatty-acid--CoA ligase 1 OS=Homo sapiens GN=ACSL1 PE=1 SV=1	ACSL1_HUMAN	78 kDa	3.7521	3.3427	2.9825	3.3591	5.2108	3.5637	1.276	3.35017	8.3874	6.7843	5.9945	7.0554	6.7069	7.325	6.1191	6.717	3.0258	1.7901	1.7507	2.18887	3.2343	1.5338	2.1093	2.29247
CD59 glycoprotein OS=Homo sapiens GN=CD59 PE=1 SV=1	CD59_HUMAN	14 kDa	1.2003	3.4359	1.3905	2.0089	3.9738	3.9978	3.7104	3.894	2.9806	4.7083	3.1713	3.62007	2.2886	3.4482	3.1356	2.95747	4.9756	2.0452	0.38774	2.46951	3.2398	4.9583	4.6334	4.27717
Peroxisomal multifunctional enzyme type 2 OS=Homo sapiens GN=HSD17B4 PE=1 SV=3	DHB4_HUMAN	80 kDa	10.456	6.0103	6.4845	7.65027	9.4669	16.175	7.5823	11.0747	1.5529	0.34128	3.7073	1.86716	8.2993	5.4162	4.4335	6.04967	0	3.0683	7.088	3.38543	4.6315	6.8364	7.4328	6.30023
Heterochromatin protein 1-binding protein 3 OS=Homo sapiens GN=HP1BP3 PE=1 SV=1	HP1B3_HUMAN	61 kDa	4.445	7.6431	5.302	5.7967	3.0892	2.5904	6.2695	3.98303	3.7288	3.9214	1.9795	3.2099	4.3839	3.6856	3.9576	4.00903	0	0.76708	4.5134	1.76016	4.4199	2.2861	4.1201	3.6087
40S ribosomal protein S15a OS=Homo sapiens GN=RPS15A PE=1 SV=2	RS15A_HUMAN	15 kDa	3.5912	10.115	8.3683	7.35817	1.2961	0.99147	6.1691	2.81889	1.5052	1.226	1.0548	1.262	0.60467	0.30434	1.0759	0.661637	14.352	18.89	9.1549	14.1323	5.8172	7.1606	10.088	7.6886
Acylglycerol kinase, mitochondrial OS=Homo sapiens GN=AGK PE=1 SV=2	AGK_HUMAN	47 kDa	4.2936	3.4359	3.2676	3.6657	3.4678	2.805	4.0058	3.4262	5.6214	3.991	2.9709	4.19443	1.9173	2.7949	6.2712	3.66113	0	0.38373	0	0.12791	3.0227	2.3007	3.7674	3.03027
Minor histocompatibility antigen H13 OS=Homo sapiens GN=HM13 PE=1 SV=1	HM13_HUMAN	41 kDa	3.9181	3.783	3.4617	3.72093	2.9163	3.6354	2.3627	2.97147	2.4471	2.452	1.5822	2.16043	2.1163	1.8261	2.4765	2.13963	5.0041	3.325	3.1019	3.81033	3.3691	3.7155	3.3468	3.47713
SUN domain-containing protein 2 OS=Homo sapiens GN=SUN2 PE=1 SV=3	SUN2_HUMAN	80 kDa	2.3322	5.4224	6.5382	4.76427	7.3453	4.2871	2.7626	4.79833	6.5214	6.3202	5.0116	5.95107	7.9843	4.9206	11.115	8.00663	0	2.5568	1.4313	1.32937	4.6489	3.053	6.9764	4.89277
Metaxin-2 OS=Homo sapiens GN=MTX2 PE=1 SV=1	MTX2_HUMAN	30 kDa	7.7552	5.3162	9.9956	7.689	10.531	3.0292	0.29534	4.61851	3.7526	3.6149	2.5737	3.31373	9.1395	5.5472	7.1045	7.26373	28.881	23.84	0	17.5737	13.604	11.348	24.115	16.3557
ATP synthase subunit g, mitochondrial OS=Homo sapiens GN=ATP5L PE=1 SV=3	ATP5L_HUMAN	11 kDa	2.5324	1.2689	2.2328	2.01137	3.3768	3.0952	2.0559	2.84263	3.4278	2.5215	2.9042	2.95117	4.4049	3.3924	2.588	3.46177	2.9675	1.5349	3.7893	2.7639	5.5818	3.7552	2.939	4.092
Junction plakoglobin OS=Homo sapiens GN=JUP PE=1 SV=3	PLAK_HUMAN	82 kDa	4.9329	22.845	17.695	15.1576	4.3034	3.8367	14.237	7.45903	4.1461	3.2737	3.1679	3.52923	4.137	3.7302	3.6736	3.84693	3.7534	9.6169	0.97523	4.78184	0.99779	5.6268	10.774	5.79953
Translocation protein SEC63 homolog OS=Homo sapiens GN=SEC63 PE=1 SV=2	SEC63_HUMAN	88 kDa	3.2556	5.5036	6.0179	4.9257	7.2793	4.0553	3.3746	4.90307	4.1251	5.5022	5.003	4.87677	2.5355	3.3128	6.8359	4.22807	4.6025	4.0907	3.8693	4.1875	2.0249	7.595	6.3168	5.31223
Synaptic vesicle membrane protein VAT-1 homolog OS=Homo sapiens GN=VAT1 PE=1 SV=2	VAT1_HUMAN	42 kDa	5.9734	0.9517	4.5972	3.84077	5.6283	4.4393	2.552	4.20653	1.544	0.68255	0.92468	1.05041	2.3087	1.8484	1.9943	2.05047	5.7249	2.6857	3.7577	4.0561	9.7672	7.891	7.8958	8.518
40S ribosomal protein S3a OS=Homo sapiens GN=RPS3A PE=1 SV=2	RS3A_HUMAN	30 kDa	5.2257	3.777	4.6509	4.5512	2.8652	2.805	2.1506	2.60693	2.6021	3.5454	2.1798	2.77577	1.6494	1.8707	1.8368	1.78563	4.1897	5.2426	4.7645	4.73227	1.2149	2.6445	2.5171	2.1255
40S ribosomal protein S3 OS=Homo sapiens GN=RPS3 PE=1 SV=2	RS3_HUMAN	27 kDa	6.8359	5.1876	3.4852	5.16957	1.6201	3.8942	1.8667	2.46033	7.6868	5.5894	3.217	5.49773	0.907	0.60869	1.7253	1.08033	5.4169	1.9186	3.9574	3.7643	6.0224	5.2479	5.804	5.69143
Eukaryotic initiation factor 4A-III OS=Homo sapiens GN=EIF4A3 PE=1 SV=4	IF4A3_HUMAN	47 kDa	6.865	5.8508	7.1408	6.61887	6.5424	7.3872	7.5811	7.17023	8.4826	11.812	6.0436	8.7794	7.2562	6.2989	5.1697	6.2416	3.8631	3.0681	5.2007	4.04397	0.80995	0.76689	3.2869	1.62125
Microsomal glutathione S-transferase 1 OS=Homo sapiens GN=MGST1 PE=1 SV=1	MGST1_HUMAN	18 kDa	3.7863	3.1247	2.2946	3.06853	4.5309	4.288	4.1119	4.31027	3.2817	3.3432	3.0377	3.22087	2.9277	2.5017	2.7552	2.7282	1.4837	1.1512	2.7259	1.78693	3.9912	1.904	2.5241	2.80643
Mitochondrial import receptor subunit TOM5 homolog OS=Homo sapiens GN=TOMM5 PE=1 SV=1	TOM5_HUMAN	6 kDa	2.2396	2.2028	0.96575	1.80272	1.0176	2.4745	3.3319	2.27467	3.1655	2.828	2.3768	2.7901	3.23	3.0992	2.319	2.88273	8.874	4.3476	2.1384	5.12	3.3984	3.3849	5.0448	3.9427
All-trans-retinol 13,14-reductase OS=Homo sapiens GN=RETSAT PE=1 SV=2	RETST_HUMAN	67 kDa	4.24	1.8676	2.418	2.84187	2.4502	1.733	2.8359	2.3397	1.6215	2.6259	1.1884	1.81193	2.8243	4.0234	4.5362	3.79463	2.4729	4.219	3.6013	3.43107	4.8304	3.4114	4.2081	4.14997
60S ribosomal protein L14 OS=Homo sapiens GN=RPL14 PE=1 SV=4	RL14_HUMAN	23 kDa	3.5717	3.1604	2.1094	2.94717	1.6201	2.6842	3.0481	2.4508	4.0299	3.5106	2.4401	3.32687	3.1267	3.3812	2.4208	2.97623	4.1897	1.5349	1.551	2.4252	2.4006	2.9883	2.9355	2.7748
Multidrug resistance protein 1 OS=Homo sapiens GN=ABCB1 PE=1 SV=3	MDR1_HUMAN	141 kDa	1.093	1.5683	5.0669	2.57607	8.2399	13.17	11.84	11.0833	1.6602	41.072	4.3562	15.6961	23.329	45.59	8.6804	25.8665	4.9717	2.946	1.8506	3.2561	2.1834	4.5272	0	2.23687
Guanine nucleotide-binding protein G(s) subunit alpha isoforms XLas OS=Homo sapiens GN=GNAS PE=1 SV=2	GNAS1_HUMAN	111 kDa	21.592	13.989	9.4143	14.9984	10.87	4.9461	16.873	10.8964	0	0	0	0	0.907	8.4304	8.6002	5.9792	2.0366	11.347	29.101	14.1615	32.113	15.134	21.172	22.8063
Cytoplasmic dynein 1 heavy chain 1 OS=Homo sapiens GN=DYNC1H1 PE=1 SV=5	DYHC1_HUMAN	532 kDa	3.0397	0.93382	13.62	5.86451	3.6397	1.8135	3.112	2.85507	1.9225	2.2846	1.8494	2.01883	0.63911	0.61984	0.26898	0.50931	1.1057	9.9717	7.1027	6.06003	1.7785	11.044	5.4255	6.08267
D-3-phosphoglycerate dehydrogenase OS=Homo sapiens GN=PHGDH PE=1 SV=4	SERA_HUMAN	57 kDa	3.9718	4.1062	5.308	4.462	2.3592	1.733	2.3513	2.14783	4.933	6.8821	5.6713	5.8288	0.97589	0.93534	1.1316	1.01428	0.98916	1.9186	2.3264	1.74472	0	1.5073	0.42186	0.643053
Transmembrane protein 43 OS=Homo sapiens GN=TMEM43 PE=1 SV=1	TMM43_HUMAN	45 kDa	3.147	8.7034	9.7328	7.1944	4.7927	5.7682	5.0282	5.19637	2.6796	1.3651	1.9829	2.0092	8.5348	2.9481	7.8096	6.43083	12.403	14.783	1.7507	9.64557	11.607	9.8529	9.5593	10.3397
Coiled-coil domain-containing protein 47 OS=Homo sapiens GN=CCDC47 PE=1 SV=1	CCD47_HUMAN	56 kDa	0	4.2239	3.5939	2.60593	1.4781	1.483	3.1198	2.02697	2.3785	7.0971	2.5103	3.9953	3.3879	4.2101	3.516	3.70467	4.248	2.6847	4.0889	3.67387	4.4547	7.2649	6.6841	6.13457
40S ribosomal protein S11 OS=Homo sapiens GN=RPS11 PE=1 SV=3	RS11_HUMAN	18 kDa	3.147	12.176	3.0207	6.11457	2.9107	3.5868	5.9822	4.1599	3.2042	2.6259	2.7072	2.84577	2.8932	2.175	2.6994	2.5892	0.98916	1.7901	3.1943	1.99119	1.6199	6.4212	2.1093	3.38347
Endoplasmic reticulum metallopeptidase 1 OS=Homo sapiens GN=ERMP1 PE=1 SV=2	ERMP1_HUMAN	100 kDa	5.256	4.663	6.4802	5.4664	2.1262	0.74152	3.4151	2.09427	2.9031	4.2627	3.3682	3.51133	3.23	2.5017	4.5362	3.42263	0.49458	3.3798	1.4628	1.77906	2.0249	7.2262	5.638	4.96303
Galectin-3 OS=Homo sapiens GN=LGALS3 PE=1 SV=5	LEG3_HUMAN	26 kDa	3.5666	5.1052	5.5107	4.7275	5.4748	8.5972	5.2298	6.43393	1.5529	5.1396	4.922	3.8715	4.3974	2.9973	2.6684	3.35437	2.7574	3.0683	3.8378	3.22117	7.8832	4.9556	4.945	5.92793
THO complex subunit 4 OS=Homo sapiens GN=ALYREF PE=1 SV=3	THOC4_HUMAN	27 kDa	3.513	3.3308	7.1703	4.67137	3.2348	3.9978	9.868	5.7002	1.9225	2.5911	3.0377	2.5171	2.9277	3.4035	3.8311	3.38743	1.6585	0	2.9257	1.52807	2.0249	3.0457	2.1093	2.3933
Nucleolar GTP-binding protein 1 OS=Homo sapiens GN=GTPBP4 PE=1 SV=3	NOG1_HUMAN	74 kDa	1.2003	9.7622	11.095	7.3525	12.615	11.104	24.99	16.2363	6.414	4.7181	3.9305	5.02087	5.9435	3.6586	7.2591	5.6204	5.1485	2.3012	4.3254	3.92503	0	0	2.4432	0.8144
40S ribosomal protein S19 OS=Homo sapiens GN=RPS19 PE=1 SV=2	RS19_HUMAN	16 kDa	0	0	12.966	4.322	0.73906	0.37076	14.121	5.07694	0.67958	0	0	0.226527	0.33678	0.631	0	0.322593	0.98916	74.144	0.97523	25.3695	1.2149	43.691	42.358	29.088
Lanosterol synthase OS=Homo sapiens GN=LSS PE=1 SV=1	ERG7_HUMAN	83 kDa	4.0644	3.654	3.5918	3.77007	5.7214	6.2271	3.3746	5.1077	0.94189	2.2846	3.435	2.2205	4.7342	3.5534	2.6437	3.64377	2.4611	4.0907	5.2323	3.92803	4.2083	1.904	2.9132	3.0085
Signal peptidase complex subunit 1 OS=Homo sapiens GN=SPCS1 PE=1 SV=4	SPCS1_HUMAN	12 kDa	2.3664	1.2451	3.857	2.4895	4.7802	6.8699	5.1893	5.61313	8.6852	8.0507	4.5915	7.10913	5.4967	3.9964	4.3981	4.6304	7.7262	4.3464	5.497	5.85653	6.0636	2.2788	4.9157	4.41937
60S ribosomal protein L26 OS=Homo sapiens GN=RPL26 PE=1 SV=1	RL26_HUMAN	17 kDa	1.0393	7.9773	2.016	3.67753	6.9487	11.74	3.0109	7.2332	29.138	20.282	13.632	21.0173	11.877	10.406	7.7409	10.008	18.013	8.9177	8.3925	11.7744	10.58	5.2825	11.423	9.09517
Splicing factor 3B subunit 1 OS=Homo sapiens GN=SF3B1 PE=1 SV=3	SF3B1_HUMAN	146 kDa	5.3915	9.0171	39.033	17.8139	4.3252	4.0553	45.18	17.8535	1.6989	3.2176	3.971	2.9625	4.6653	3.6809	3.2975	3.88123	0	0	4.5534	1.5178	0	0	0	0
Heme oxygenase 2 OS=Homo sapiens GN=HMOX2 PE=1 SV=2	HMOX2_HUMAN	36 kDa	5.0109	5.3232	34.986	15.1067	3.9102	0	26.625	10.1784	0	0.613	0.5274	0.380133	9.2953	4.0267	4.9158	6.07927	0	6.1366	5.0094	3.71533	11.106	7.2066	6.9335	8.41537
Zinc transporter 1 OS=Homo sapiens GN=SLC30A1 PE=1 SV=3	ZNT1_HUMAN	55 kDa	26.384	2.1728	12.143	13.5666	10.304	3.9144	18.951	11.0565	0	0	0.5274	0.1758	2.4016	3.9808	21.268	9.2168	15.186	20.448	19.721	18.4517	12.994	14.401	16.287	14.5607
Heterogeneous nuclear ribonucleoprotein U-like protein 2 OS=Homo sapiens GN=HNRNPUL2 PE=1 SV=1	HNRL2_HUMAN	85 kDa	5.0938	14.392	19.038	12.8413	3.0983	1.4428	13.028	5.85637	2.0387	3.3432	1.9161	2.43267	4.2403	4.0792	2.4862	3.6019	0	0	1.4628	0.4876	0	0	0	0
Estradiol 17-beta-dehydrogenase 2 OS=Homo sapiens GN=HSD17B2 PE=1 SV=1	DHB2_HUMAN	43 kDa	4.4558	3.7413	3.2676	3.82157	3.1438	4.1818	2.552	3.29253	2.7183	2.0477	3.2335	2.6665	2.8073	1.262	6.4681	3.51247	7.545	9.0672	5.2847	7.29897	8.6436	3.0379	7.3255	6.33567
Very-long-chain (3R)-3-hydroxyacyl-CoA dehydratase 2 OS=Homo sapiens GN=HACD2 PE=1 SV=1	HACD2_HUMAN	28 kDa	5.0804	6.0222	4.0349	5.04583	5.3792	6.4665	2.9961	4.94727	2.9209	5.307	3.2432	3.8237	10.058	8.0534	4.3778	7.4964	0.91913	6.137	3.5782	3.54478	9.6799	0.74046	4.4903	4.97022
Histone-binding protein RBBP4 OS=Homo sapiens GN=RBBP4 PE=1 SV=3	RBBP4_HUMAN	48 kDa	2.6787	3.0314	0.66441	2.12484	18.961	14.908	13.764	15.8777	4.6674	3.7745	7.0927	5.1782	9.389	7.3172	7.797	8.16773	0.91913	0	0.71563	0.54492	0	0	0.8367	0.2789
40S ribosomal protein S14 OS=Homo sapiens GN=RPS14 PE=1 SV=3	RS14_HUMAN	16 kDa	4.6791	1.8676	3.9717	3.50613	3.2257	3.9394	2.278	3.1477	1.8838	2.2392	3.1131	2.41203	2.1097	3.606	3.2975	3.0044	5.8414	4.0907	6.6834	5.5385	4.4199	5.2935	4.1166	4.61
Pyrroline-5-carboxylate reductase 1, mitochondrial OS=Homo sapiens GN=PYCR1 PE=1 SV=2	P5CR1_HUMAN	33 kDa	4.1181	4.2239	6.0516	4.79787	3.2621	4.0907	4.2201	3.85763	4.1727	2.8309	2.9795	3.3277	2.9268	2.7344	0	1.88707	10.437	12.145	8.0831	10.2217	0.80995	3.7816	4.938	3.17652
Pyrroline-5-carboxylate reductase 2 OS=Homo sapiens GN=PYCR2 PE=1 SV=1	P5CR2_HUMAN	34 kDa	1.0393	0.31127	0	0.45019	0	0	0	0	0.33979	0	0	0.113263	0.60467	0	0	0.201557	0	1.9186	1.9387	1.28577	0	1.8776	0	0.625867
7-dehydrocholesterol reductase OS=Homo sapiens GN=DHCR7 PE=1 SV=1	DHCR7_HUMAN	54 kDa	2.4251	1.9034	2.1094	2.14597	2.9163	2.6439	2.0674	2.54253	2.1073	2.452	2.3733	2.31087	2.1163	1.5217	2.1518	1.92993	2.4729	4.6047	1.551	2.8762	2.9641	3.3321	4.1835	3.49323
Eukaryotic translation initiation factor 5A-1-like OS=Homo sapiens GN=EIF5AL1 PE=2 SV=2	IF5AL_HUMAN	17 kDa	1.1661	5.1052	3.2309	3.1674	3.3076	4.2871	1.6873	3.094	13.439	7.549	6.0522	9.0134	3.0503	1.3672	2.0544	2.1573	8.825	5.6251	4.3254	6.2585	58.074	61.067	54.757	57.966
Cytochrome c oxidase subunit 6C OS=Homo sapiens GN=COX6C PE=1 SV=2	COX6C_HUMAN	9 kDa	1.8931	1.8796	1.9315	1.9014	2.4047	3.2917	2.6466	2.781	2.4859	1.0238	2.9709	2.1602	2.8932	3.088	3.2374	3.07287	5.6735	4.7313	2.6261	4.34363	0.80995	2.2346	2.5171	1.85388
Serotransferrin OS=Homo sapiens GN=TF PE=1 SV=3	TRFE_HUMAN	77 kDa	0	8.7647	6.1902	4.98497	4.5912	8.393	12.224	8.40273	1.7466	0	0.33049	0.692363	30.428	5.6306	4.007	13.3552	3.7725	28.541	24.865	19.0595	75.365	10.539	34.574	40.1593
FERM, RhoGEF and pleckstrin domain-containing protein 1 OS=Homo sapiens GN=FARP1 PE=1 SV=1	FARP1_HUMAN	119 kDa	3.8776	10.907	14.338	9.70753	0	1.8135	8.2002	3.3379	1.9225	1.602	1.1884	1.57097	6.5215	1.2397	2.6994	3.48687	3.4062	7.3277	1.9505	4.22813	0.80995	15.904	20.67	12.4613
Lysosome membrane protein 2 OS=Homo sapiens GN=SCARB2 PE=1 SV=2	SCRB2_HUMAN	54 kDa	2.9324	3.4598	3.6234	3.33853	3.2348	3.5062	4.2065	3.64917	2.301	3.5106	2.3768	2.72947	5.4497	3.4259	3.2931	4.05623	0	0	0	0	0.80995	1.1503	0.42186	0.794037
Chromodomain-helicase-DNA-binding protein 4 OS=Homo sapiens GN=CHD4 PE=1 SV=2	CHD4_HUMAN	218 kDa	1.1661	3.9473	5.0918	3.40173	11.403	13.15	7.951	10.8347	2.9209	8.2687	5.4579	5.54917	20.635	16.832	11.221	16.2293	5.7067	7.3836	7.2892	6.79317	15.979	4.5421	16.558	12.3597
Chromodomain-helicase-DNA-binding protein 5 OS=Homo sapiens GN=CHD5 PE=1 SV=1	CHD5_HUMAN	223 kDa	0	0	0	0	0	0	0	0	0	0	0	0	0	3.3721	0	1.12403	0	1.8459	0	0.6153	0	0	0	0
Guanine nucleotide-binding protein G(I)/G(S)/G(T) subunit beta-1 OS=Homo sapiens GN=GNB1 PE=1 SV=3	GBB1_HUMAN	37 kDa	8.9008	7.5361	4.9522	7.1297	5.594	7.093	8.803	7.16333	5.6901	47.232	24.743	25.8884	10.186	8.2715	17.662	12.0398	5.2954	4.4751	2.9139	4.22813	8.4641	6.4393	5.8815	6.9283
Receptor expression-enhancing protein 5 OS=Homo sapiens GN=REEP5 PE=1 SV=3	REEP5_HUMAN	21 kDa	2.2932	1.5683	1.2054	1.68897	1.7566	2.5148	2.1506	2.14067	3.2042	1.9781	1.8494	2.3439	1.6494	2.4905	1.8368	1.99223	7.5068	3.9638	2.6261	4.6989	3.2105	3.4114	5.0553	3.8924
Echinoderm microtubule-associated protein-like 4 OS=Homo sapiens GN=EML4 PE=1 SV=3	EMAL4_HUMAN	109 kDa	5.2768	11.751	14.391	10.4729	13.253	7.8288	7.2533	9.44503	0	0	0	0	0	1.3672	3.3325	1.56657	3.252	19.385	28.028	16.8883	12.028	12.487	10.488	11.6677
Erlin-2 OS=Homo sapiens GN=ERLIN2 PE=1 SV=1	ERLN2_HUMAN	38 kDa	4.611	3.4836	4.2805	4.12503	3.9338	2.3134	5.6947	3.98063	3.2817	4.0782	8.5504	5.30343	5.8132	7.2055	7.9923	7.00367	3.5203	1.1512	3.1019	2.59113	4.3669	2.5916	3.7651	3.57453
Transmembrane protein 214 OS=Homo sapiens GN=TMEM214 PE=1 SV=2	TM214_HUMAN	77 kDa	3.1324	0.62255	1.3523	1.70242	3.2712	2.1843	1.8552	2.4369	0.98063	3.5454	2.3768	2.30094	2.5909	2.1862	4.3938	3.05697	1.4837	3.7077	4.0889	3.09343	4.408	5.2493	5.0272	4.89483
Protein NipSnap homolog 1 OS=Homo sapiens GN=NIPSNAP1 PE=1 SV=1	NIPS1_HUMAN	33 kDa	12.227	5.1935	9.8852	9.1019	1.4736	1.8489	7.0155	3.446	1.2042	0.91949	1.0548	1.0595	0	3.9518	5.6006	3.18413	3.0258	6.5213	3.37	4.3057	4.9835	8.3246	5.723	6.3437
Profilin-1 OS=Homo sapiens GN=PFN1 PE=1 SV=2	PROF1_HUMAN	15 kDa	4.3182	5.034	3.4382	4.26347	2.6832	2.394	1.3706	2.14927	4.1073	2.828	3.9589	3.6314	0.60467	0.60869	0.53796	0.583773	1.6003	2.5575	3.5895	2.58243	0	3.7419	0.41835	1.38675
Vesicle-fusing ATPase OS=Homo sapiens GN=NSF PE=1 SV=3	NSF_HUMAN	83 kDa	0.69288	2.7082	3.006	2.13569	0.97209	3.5062	0.68531	1.7212	2.1848	2.5215	2.8374	2.51457	2.1508	3.0769	3.8868	3.03817	2.4729	3.4524	2.5262	2.81717	2.7763	4.4619	5.8193	4.3525
40S ribosomal protein S8 OS=Homo sapiens GN=RPS8 PE=1 SV=2	RS8_HUMAN	24 kDa	3.4644	4.1121	2.5342	3.37023	3.0073	2.7245	2.2567	2.66283	1.5052	1.226	2.4401	1.72377	1.5117	1.2174	0.80694	1.17868	4.3112	4.8595	4.8526	4.67443	1.1856	1.8512	2.5101	1.84897
Elongation factor 1-gamma OS=Homo sapiens GN=EEF1G PE=1 SV=3	EF1G_HUMAN	50 kDa	5.4646	2.7142	4.4832	4.22067	2.9381	2.5723	2.5947	2.7017	5.046	0.34128	0.2637	1.88366	0	0	0	0	5.7014	8.6931	9.5544	7.98297	10.09	11.78	13.182	11.684
40S ribosomal protein S26 OS=Homo sapiens GN=RPS26 PE=1 SV=3	RS26_HUMAN	13 kDa	3.718	4.5005	8.0933	5.43727	5.7033	8.1813	2.7007	5.52843	7.046	4.0569	4.3243	5.1424	6.5473	1.6715	2.1765	3.4651	0.98916	1.5345	5.7849	2.76952	0	5.2789	1.6511	2.31
Asialoglycoprotein receptor 2 OS=Homo sapiens GN=ASGR2 PE=1 SV=2	ASGR2_HUMAN	35 kDa	3.4775	3.5488	3.494	3.50677	4.7802	3.4297	7.5159	5.24193	0	0	7.3564	2.45213	9.9134	5.4688	4.7936	6.72527	10.11	6.1366	5.0094	7.08533	10.097	9.867	12.909	10.9577
Coatomer subunit alpha OS=Homo sapiens GN=COPA PE=1 SV=2	COPA_HUMAN	138 kDa	6.4429	15.213	14.525	12.0603	7.3522	10.159	1.7349	6.41537	0	0.3065	3.5463	1.28427	0.76257	0	1.3696	0.710723	3.252	12.13	11.473	8.95167	0	22.658	3.6759	8.77797
Neutral alpha-glucosidase AB OS=Homo sapiens GN=GANAB PE=1 SV=3	GANAB_HUMAN	107 kDa	11.116	16.156	16.08	14.4507	1.4725	6.2424	5.1494	4.2881	1.3592	7.7572	9.6161	6.24417	0	0	1.6662	0.5554	15.925	11.817	0.48762	9.40987	0.40497	3.0155	0	1.14016
Bifunctional glutamate/proline--tRNA ligase OS=Homo sapiens GN=EPRS PE=1 SV=5	SYEP_HUMAN	171 kDa	0.74652	5.4165	3.1059	3.08964	4.4162	4.9127	3.6294	4.31943	6.4051	5.537	7.0755	6.3392	4.7342	5.2584	2.8817	4.29143	1.8383	0.76708	3.2818	1.96239	0	1.5338	1.6288	1.0542
Fibrinogen alpha chain OS=Homo sapiens GN=FGA PE=1 SV=2	FIBA_HUMAN	95 kDa	0	0	0	0	0	0	0	0	0	0	0	0	0.33678	0	0	0.11226	0.55285	0.5113	0.38774	0.483963	3.4395	62.161	111.78	59.1268
Keratin, type I cytoskeletal 9 OS=Homo sapiens GN=KRT9 PE=1 SV=3	K1C9_HUMAN	62 kDa	0	3.7949	3.6851	2.49333	0.32403	0.37076	0	0.231597	5.5351	2.215	0.7911	2.84707	0.30233	0.60869	2.2633	1.05811	13.15	1.9186	1.9387	5.6691	13.506	2.261	6.7041	7.49037
Bifunctional purine biosynthesis protein PURH OS=Homo sapiens GN=ATIC PE=1 SV=3	PUR9_HUMAN	65 kDa	6.0769	1.5564	5.13	4.25443	2.9416	5.6292	1.5865	3.38577	12.894	22.058	15.293	16.7483	3.5938	8.4304	2.6757	4.89997	19.973	10.58	15.089	15.214	0	15.53	8.323	7.951
60S ribosomal protein L31 OS=Homo sapiens GN=RPL31 PE=1 SV=1	RL31_HUMAN	14 kDa	1.3858	2.514	2.5959	2.16523	3.1438	4.127	3.8165	3.69577	2.1848	1.2608	0.85789	1.4345	3.1611	1.8595	1.3449	2.12183	4.1315	1.5349	2.4263	2.69757	0.40497	3.3849	3.7757	2.52186
RNA-binding protein 14 OS=Homo sapiens GN=RBM14 PE=1 SV=2	RBM14_HUMAN	69 kDa	10.433	16.565	10.369	12.4557	10.101	12.96	3.7175	8.92617	5.353	13.445	10.916	9.90467	17.481	14.43	15.557	15.8227	11.773	11.54	25.58	16.2977	0	2.9931	0	0.9977
Ras-related protein Rap-1b OS=Homo sapiens GN=RAP1B PE=1 SV=1	RAP1B_HUMAN	21 kDa	5.4964	1.8855	1.8698	3.0839	1.6201	1.3622	3.0481	2.01013	3.3293	1.602	1.649	2.19343	1.5806	2.4571	1.4563	1.83133	1.542	2.5575	2.5262	2.20857	4.1909	1.8644	2.5101	2.85513
ADP-ribosylation factor 4 OS=Homo sapiens GN=ARF4 PE=1 SV=3	ARF4_HUMAN	21 kDa	2.7715	3.4896	3.3147	3.19193	0.97209	0.99147	0	0.65452	2.7094	3.678	2.9007	3.09603	1.2093	0.30434	0.80694	0.773527	5.4404	3.4535	3.1019	3.9986	0.59282	0.74046	2.0917	1.14166
ADP-ribosylation factor 5 OS=Homo sapiens GN=ARF5 PE=1 SV=2	ARF5_HUMAN	21 kDa	2.0786	2.8551	3.0134	2.64903	0	0.99147	0.59068	0.527383	1.2042	2.1455	1.5822	1.64397	0	0	0	0	0	0	0	0	0	0	0.8367	0.2789
ADP-ribosylation factor 1 OS=Homo sapiens GN=ARF1 PE=1 SV=2	ARF1_HUMAN (+1)	21 kDa	2.0786	2.8551	3.0134	2.64903	0	0.99147	0.59068	0.527383	1.5052	2.1455	1.5822	1.7443	0	0	0	0	0	0	0	0	0	0	0	0
Prosaposin OS=Homo sapiens GN=PSAP PE=1 SV=2	SAP_HUMAN	58 kDa	2.7715	5.0757	4.0027	3.94997	0.64806	1.322	2.552	1.50735	3.389	2.1455	1.8459	2.46013	1.5117	2.4347	2.4208	2.1224	0.98916	0.76745	5.9159	2.5575	1.7785	1.4809	0	1.08647
Transcription factor A, mitochondrial OS=Homo sapiens GN=TFAM PE=1 SV=1	TFAM_HUMAN	29 kDa	1.9468	0.93382	0.72614	1.20225	2.9472	4.0553	1.1699	2.72413	1.0194	1.7064	2.4698	1.73187	0.67355	1.2397	2.9931	1.63545	8.7805	5.7535	2.7259	5.7533	7.2136	4.1782	5.8697	5.75383
40S ribosomal protein S13 OS=Homo sapiens GN=RPS13 PE=1 SV=2	RS13_HUMAN	17 kDa	3.7326	0.93382	3.3838	2.68341	1.8021	1.483	2.5	1.92837	1.6215	2.6954	4.4265	2.91447	3.031	1.5663	2.8666	2.48797	0.55285	2.0452	7.702	3.43335	2.4298	1.904	2.1093	2.1477
Amyloid-like protein 2 OS=Homo sapiens GN=APLP2 PE=1 SV=2	APLP2_HUMAN	87 kDa	4.8572	4.7473	10.34	6.64817	9.1977	8.8146	7.179	8.3971	7.7614	10.044	12.827	10.2108	8.7128	6.4254	9.4042	8.1808	10.302	8.6835	4.2938	7.75977	7.0237	5.3094	10.315	7.54937
Ras-related protein Rab-11A OS=Homo sapiens GN=RAB11A PE=1 SV=3	RB11A_HUMAN	24 kDa	1.8931	1.257	1.9315	1.69387	2.0352	2.9209	2.552	2.5027	2.2236	2.5911	2.6405	2.48507	1.5117	3.0992	2.6437	2.4182	3.2006	2.9412	2.5262	2.88933	1.8077	2.2478	3.7792	2.61157
Disintegrin and metalloproteinase domain-containing protein 10 OS=Homo sapiens GN=ADAM10 PE=1 SV=1	ADA10_HUMAN	84 kDa	2.0553	28.014	18.197	16.0888	6.9452	14.315	20.984	14.0814	4.7808	0.94363	6.5521	4.09218	9.7777	8.1115	9.7008	9.19667	7.545	8.6835	4.0024	6.74363	6.014	16.898	5.1575	9.3565
Carnitine O-palmitoyltransferase 1, liver isoform OS=Homo sapiens GN=CPT1A PE=1 SV=2	CPT1A_HUMAN	88 kDa	2.3469	3.1485	2.6576	2.71767	3.5588	2.805	3.9112	3.425	3.7288	2.5563	2.8374	3.04083	3.0578	3.6967	4.2576	3.6707	0	0	0	0	0.40497	0	0	0.13499
HLA class II histocompatibility antigen gamma chain OS=Homo sapiens GN=CD74 PE=1 SV=3	HG2A_HUMAN	34 kDa	0.34644	0.8872	1.112	0.78188	15.904	13.455	4.9678	11.4423	0	1.5566	1.3448	0.967133	35.515	44.365	4.531	28.137	0	0	0	0	18.986	3.4066	6.1075	9.50003
Mitochondrial 2-oxoglutarate/malate carrier protein OS=Homo sapiens GN=SLC25A11 PE=1 SV=3	M2OM_HUMAN	34 kDa	2.2396	1.2451	1.7536	1.7461	1.3871	2.5953	1.276	1.7528	3.2042	2.5563	3.4983	3.08627	3.5668	2.175	3.5064	3.08273	1.1057	4.3476	0.48762	1.98031	3.774	2.6313	1.6839	2.6964
Membrane-associated progesterone receptor component 1 OS=Homo sapiens GN=PGRMC1 PE=1 SV=3	PGRC1_HUMAN	22 kDa	1.093	4.0823	6.7293	3.9682	5.1334	2.7647	5.4825	4.4602	2.5634	2.828	2.5737	2.65503	2.4876	2.7837	2.2633	2.51153	5.0623	6.6489	4.6646	5.4586	3.5862	4.522	2.939	3.6824
Dolichyl-diphosphooligosaccharide--protein glycosyltransferase subunit DAD1 OS=Homo sapiens GN=DAD1 PE=1 SV=3	DAD1_HUMAN	12 kDa	1.0393	1.5862	1.5067	1.3774	1.9442	2.3134	1.7721	2.0099	2.7094	3.065	2.637	2.8038	1.5117	3.0434	2.4208	2.3253	2.4729	2.6861	2.7142	2.6244	2.3713	2.5916	2.0917	2.35153
NAD(P)H dehydrogenase [quinone] 1 OS=Homo sapiens GN=NQO1 PE=1 SV=1	NQO1_HUMAN	31 kDa	1.9468	2.8015	5.6871	3.47847	1.7976	2.1843	1.9499	1.97727	2.3398	2.3194	3.8323	2.8305	2.0207	0.94649	1.2988	1.422	2.7642	3.9631	6.8233	4.51687	0	5.3199	1.6288	2.31623
Plasminogen activator inhibitor 1 RNA-binding protein OS=Homo sapiens GN=SERBP1 PE=1 SV=2	PAIRB_HUMAN	45 kDa	0	4.3824	0.36307	1.58182	0	0	15.574	5.19133	0	0	0	0	0	0	0	0	19.933	24.46	4.0024	16.1318	19.41	83.288	297.05	133.249
Cytochrome b-c1 complex subunit 7 OS=Homo sapiens GN=UQCRB PE=1 SV=2	QCR7_HUMAN	14 kDa	0.69288	0.9517	1.9315	1.19203	2.1717	2.805	2.3513	2.44267	2.1461	2.2498	3.762	2.7193	2.1852	2.1639	2.05	2.13303	6.3429	1.5349	0.38774	2.75518	3.5862	3.0147	3.3608	3.32057
Nuclear pore complex protein Nup205 OS=Homo sapiens GN=NUP205 PE=1 SV=3	NU205_HUMAN	228 kDa	2.586	7.0317	8.9291	6.18227	3.8692	6.0604	12.939	7.62287	2.7958	2.2044	3.2695	2.75657	4.5074	3.2793	2.3747	3.38713	0.49458	1.5342	0	0.67626	3.434	3.4143	1.2363	2.69487
Transmembrane emp24 domain-containing protein 5 OS=Homo sapiens GN=TMED5 PE=1 SV=1	TMED5_HUMAN	26 kDa	2.586	2.5259	4.3271	3.14633	1.0631	1.9829	2.162	1.736	1.8063	1.9085	3.0343	2.2497	1.814	4.4892	2.1518	2.81833	2.0949	3.1974	1.9387	2.41033	2.9641	3.7023	1.255	2.64047
Protein SCO1 homolog, mitochondrial OS=Homo sapiens GN=SCO1 PE=1 SV=1	SCO1_HUMAN	34 kDa	0	3.5488	3.7332	2.42733	4.4072	3.4297	40.513	16.1166	16.512	2.8309	2.1622	7.16837	3.3526	2.0508	2.7038	2.7024	0.91913	1.5342	2.2067	1.55334	0	35.405	28.652	21.3523
Lysosome-associated membrane glycoprotein 1 OS=Homo sapiens GN=LAMP1 PE=1 SV=3	LAMP1_HUMAN	45 kDa	3.1179	2.5379	3.3147	2.99017	3.2403	2.3134	1.1814	2.24503	1.5052	1.839	2.1096	1.81793	1.5117	1.2174	1.6139	1.44767	2.9675	2.3024	2.3264	2.5321	1.7785	2.2214	3.3468	2.4489
Lysosome-associated membrane glycoprotein 2 OS=Homo sapiens GN=LAMP2 PE=1 SV=2	LAMP2_HUMAN	45 kDa	1.3858	3.1723	2.7121	2.4234	1.6201	2.6439	1.7721	2.01203	2.4471	3.3715	3.4281	3.08223	1.5117	2.7502	3.0702	2.44403	0.55285	0.76745	1.551	0.9571	2.3713	1.8512	1.255	1.82583
40S ribosomal protein S16 OS=Homo sapiens GN=RPS16 PE=1 SV=2	RS16_HUMAN	16 kDa	4.611	3.1545	3.863	3.87617	2.3592	2.4745	2.162	2.3319	1.2042	2.215	3.3648	2.26133	1.2438	1.544	0.53796	1.10859	1.4837	1.2788	2.5262	1.7629	1.7785	2.9751	2.0917	2.28177
Mesencephalic astrocyte-derived neurotrophic factor OS=Homo sapiens GN=MANF PE=1 SV=3	MANF_HUMAN	21 kDa	0	4.3457	5.5601	3.30193	7.7321	0	0	2.57737	0	0	0	0	0	0	0	0	2.706	7.6709	20.772	10.383	43.972	17.405	29.97	30.449
Eukaryotic initiation factor 4A-I OS=Homo sapiens GN=EIF4A1 PE=1 SV=1	IF4A1_HUMAN	46 kDa	5.172	4.693	4.0482	4.63773	3.1893	3.5465	3.9112	3.549	4.5633	2.9324	3.4983	3.66467	2.0207	2.1862	3.0241	2.41033	1.6003	5.3702	6.2273	4.39927	1.2149	2.261	1.2621	1.57933
Eukaryotic initiation factor 4A-II OS=Homo sapiens GN=EIF4A2 PE=1 SV=2	IF4A2_HUMAN	46 kDa	4.4255	3.4479	2.959	3.6108	2.8197	2.805	3.1312	2.91863	2.8644	2.2498	3.1679	2.7607	1.6839	2.5017	2.3747	2.18677	0.49458	3.8363	2.3264	2.21909	0	1.1107	0	0.370233
Coxsackievirus and adenovirus receptor OS=Homo sapiens GN=CXADR PE=1 SV=1	CXAR_HUMAN	40 kDa	0	0.9517	2.7587	1.2368	10.354	5.5074	2.7527	6.2047	20.337	0	1.1216	7.15287	5.4078	6.449	2.2076	4.68813	23.023	5.9214	8.2044	12.3829	3.7338	4.9139	4.7033	4.45033
Peptidyl-prolyl cis-trans isomerase FKBP11 OS=Homo sapiens GN=FKBP11 PE=1 SV=1	FKB11_HUMAN	22 kDa	3.5717	1.8915	2.1711	2.54477	2.1262	3.9526	2.6466	2.90847	3.1267	2.215	3.0343	2.792	4.7618	4.989	4.4956	4.7488	0	0	0	0	0	0	0	0
NHP2-like protein 1 OS=Homo sapiens GN=SNU13 PE=1 SV=3	NH2L1_HUMAN	14 kDa	3.3325	2.514	1.5067	2.45107	1.9442	3.0952	3.6273	2.8889	2.9031	1.6368	2.6405	2.39347	2.522	3.4035	2.9127	2.94607	0.98916	0.76745	1.551	1.10254	1.4028	0.37023	2.0988	1.29061
Mitochondrial import inner membrane translocase subunit TIM50 OS=Homo sapiens GN=TIMM50 PE=1 SV=2	TIM50_HUMAN	40 kDa	0.74652	1.8796	1.6302	1.41877	1.7566	1.733	0.88603	1.45854	3.9612	4.8757	2.31	3.71563	4.5082	2.175	2.5323	3.07183	1.1057	1.5339	2.6261	1.75523	1.8077	1.8908	2.5241	2.0742
Serine/threonine-protein phosphatase 2A 65 kDa regulatory subunit A alpha isoform OS=Homo sapiens GN=PPP2R1A PE=1 SV=4	2AAA_HUMAN	65 kDa	9.3679	18.005	11.421	12.9313	10.308	5.8716	9.5189	8.56617	1.2817	4.2862	4.681	3.4163	25.459	16.861	0.86266	14.3942	2.8534	7.8949	7.349	6.03243	1.9973	9.4783	2.6081	4.69457
Peptidyl-tRNA hydrolase 2, mitochondrial OS=Homo sapiens GN=PTRH2 PE=1 SV=1	PTH2_HUMAN	19 kDa	2.4005	1.8676	1.0892	1.78577	2.9562	2.2246	0.77994	1.98691	2.0387	3.378	2.9076	2.77477	1.3471	2.5128	2.5976	2.1525	2.7642	2.5565	3.4133	2.91133	2.8348	3.8199	2.953	3.20257
NADPH:adrenodoxin oxidoreductase, mitochondrial OS=Homo sapiens GN=FDXR PE=1 SV=3	ADRO_HUMAN	54 kDa	0.74652	0.8872	5.0859	2.23987	4.4072	5.5153	3.0174	4.3133	3.8063	8.8765	5.3158	5.99953	4.7887	2.3137	3.4754	3.52593	2.7574	4.0909	4.0257	3.62467	0	2.2729	0.81439	1.0291
60S ribosomal protein L27a OS=Homo sapiens GN=RPL27A PE=1 SV=2	RL27A_HUMAN	17 kDa	2.8788	1.5802	1.9315	2.13017	1.7111	2.0232	2.7412	2.1585	1.845	3.4063	2.7706	2.67397	1.2093	2.1304	1.4006	1.5801	0.98916	2.5575	1.9387	1.82845	2.3713	4.5207	2.9284	3.27347
ATP-dependent RNA helicase DDX18 OS=Homo sapiens GN=DDX18 PE=1 SV=2	DDX18_HUMAN	75 kDa	2.3469	3.3774	12.241	5.98843	3.6043	2.4745	10.788	5.62227	2.5634	1.6368	2.7072	2.30247	4.1714	2.5128	1.8925	2.8589	0	0	0.97523	0.325077	0	0.38344	0	0.127813
Nucleolar complex protein 4 homolog OS=Homo sapiens GN=NOC4L PE=1 SV=1	NOC4L_HUMAN	58 kDa	4.5107	17.773	15.929	12.7376	4.3322	4.1415	13.916	7.46323	0.67958	1.9433	2.4435	1.68879	2.9621	4.1877	2.1058	3.0852	0	0	20.108	6.70267	0	2.271	3.5287	1.93323
Sphingosine-1-phosphate lyase 1 OS=Homo sapiens GN=SGPL1 PE=1 SV=3	SGPL1_HUMAN	64 kDa	2.1323	2.52	2.6576	2.43663	2.8607	1.1123	1.7606	1.9112	3.5052	2.5215	2.4401	2.82227	3.3946	3.6633	4.8513	3.96973	0.49458	0	0	0.16486	0.80995	0	1.6839	0.831283
60S ribosomal protein L11 OS=Homo sapiens GN=RPL11 PE=1 SV=2	RL11_HUMAN	20 kDa	2.8251	1.5742	0.90402	1.76777	1.6201	1.6927	1.7721	1.69497	2.7869	2.1803	2.2432	2.40347	1.8485	1.8372	2.5323	2.07267	3.1423	3.5801	3.4015	3.37463	2.7763	1.1107	2.0988	1.99527
Antigen KI-67 OS=Homo sapiens GN=MKI67 PE=1 SV=2	KI67_HUMAN	359 kDa	2.7323	0.62851	1.7147	1.69184	13.533	10.053	13.902	12.496	0.67958	0.34128	2.5726	1.19782	11.342	10.639	10.531	10.8373	0	0	0	0	9.6313	1.519	8.323	6.4911
Emerin OS=Homo sapiens GN=EMD PE=1 SV=1	EMD_HUMAN	29 kDa	0.34644	4.4946	5.0301	3.29038	8.4153	8.0453	6.1167	7.52577	6.1816	3.8199	2.7564	4.25263	5.9225	9.7125	10.805	8.81333	0	0	1.4313	0.4771	1.0097	0	3.2799	1.42987
Probable 28S rRNA (cytosine(4447)-C(5))-methyltransferase OS=Homo sapiens GN=NOP2 PE=1 SV=2	NOP2_HUMAN	89 kDa	1.8395	3.7471	6.0782	3.88827	3.7463	2.4342	11.465	5.88183	1.8838	2.1803	1.9795	2.01453	3.0922	2.7614	2.8012	2.88493	0	0	1.9387	0.646233	0.40497	0.38344	0	0.262803
U3 small nucleolar RNA-associated protein 18 homolog OS=Homo sapiens GN=UTP18 PE=1 SV=3	UTP18_HUMAN	62 kDa	2.7665	6.5217	6.0986	5.12893	9.5534	8.7007	5.7067	7.98693	3.2994	2.5698	3.1131	2.9941	7.8735	4.049	2.9728	4.9651	1.0474	0.76745	3.1221	1.64565	0.40497	0.76689	1.6581	0.94332
Cytochrome b-c1 complex subunit 8 OS=Homo sapiens GN=UQCRQ PE=1 SV=4	QCR8_HUMAN	10 kDa	2.2932	1.5742	1.6302	1.83253	3.2348	3.216	2.9305	3.1271	2.1848	0.3065	1.5857	1.359	1.9518	2.1862	2.4862	2.20807	3.6951	2.3014	1.2631	2.41987	2.9934	3.0543	2.0988	2.7155
E3 SUMO-protein ligase RanBP2 OS=Homo sapiens GN=RANBP2 PE=1 SV=2	RBP2_HUMAN	358 kDa	4.6645	4.3294	9.2046	6.06617	5.1417	6.136	9.2891	6.8556	5.6481	11.39	3.5069	6.84833	6.1215	1.9759	4.1956	4.09767	0	0	0	0	2.0194	1.4966	0	1.172
NADH dehydrogenase [ubiquinone] 1 alpha subcomplex subunit 12 OS=Homo sapiens GN=NDUFA12 PE=1 SV=1	NDUAC_HUMAN	17 kDa	3.2214	2.6616	4.7287	3.53723	8.0947	8.0856	3.2738	6.4847	6.113	2.8309	2.2957	3.74653	1.8619	2.3137	2.019	2.06487	3.3102	12.753	3.0747	6.3793	7.022	8.7308	10.656	8.80293
Golgi apparatus protein 1 OS=Homo sapiens GN=GLG1 PE=1 SV=2	GSLG1_HUMAN	135 kDa	0.80017	0.62255	0.72614	0.716287	0.73906	0.37076	1.5599	0.889907	1.3592	0.34128	0	0.566827	0.67355	0.94649	2.2729	1.29765	3.8117	4.8579	2.8258	3.8318	7.231	6.8491	9.2411	7.77373
Heme oxygenase 1 OS=Homo sapiens GN=HMOX1 PE=1 SV=1	HMOX1_HUMAN	33 kDa	1.1466	0.93382	1.3905	1.15697	2.8197	2.1843	2.3513	2.45177	3.3204	4.0258	3.8323	3.72617	2.3574	4.9587	4.3026	3.8729	1.1057	0	0.97523	0.693643	0	0.38344	0.84372	0.409053
AP-2 complex subunit beta OS=Homo sapiens GN=AP2B1 PE=1 SV=1	AP2B1_HUMAN	105 kDa	2.2932	0.62255	1.6302	1.51532	2.0352	2.394	2.4459	2.2917	0.30105	2.5215	2.5069	1.77648	1.5806	1.5329	4.1558	2.4231	0	0	0.48762	0.16254	0	5.6988	1.2656	2.32147
AP-1 complex subunit beta-1 OS=Homo sapiens GN=AP1B1 PE=1 SV=2	AP1B1_HUMAN	105 kDa	1.1466	0.93382	0.90402	0.994813	1.7111	2.0635	2.0559	1.9435	0	1.9085	1.9795	1.296	1.0103	0.3155	2.3747	1.2335	0	0	0.48762	0.16254	0	3.0279	0.42186	1.14992
NADH dehydrogenase [ubiquinone] 1 alpha subcomplex subunit 13 OS=Homo sapiens GN=NDUFA13 PE=1 SV=3	NDUAD_HUMAN	17 kDa	1.2003	1.8676	1.4523	1.50673	2.5822	1.8538	1.1699	1.86863	0.98063	1.0238	1.322	1.10881	1.6839	1.262	1.9482	1.63137	5.9648	5.2416	3.4133	4.87323	4.8304	2.2874	3.7897	3.63583
ATP synthase subunit e, mitochondrial OS=Homo sapiens GN=ATP5I PE=1 SV=2	ATP5I_HUMAN	8 kDa	3.2252	2.2028	1.0275	2.15183	2.3592	3.1355	3.0366	2.84377	1.845	2.1803	1.9795	2.0016	1.2093	1.8484	0.86266	1.30679	1.542	2.8127	1.7507	2.03513	4.3669	2.261	1.2586	2.62883
CAAX prenyl protease 1 homolog OS=Homo sapiens GN=ZMPSTE24 PE=1 SV=2	FACE1_HUMAN	55 kDa	0.34644	5.3758	5.1094	3.61055	0.32403	1.1123	5.39	2.27544	1.5827	1.3303	1.1884	1.36713	1.2782	1.2397	1.1874	1.2351	2.2114	2.8127	2.1384	2.3875	1.1856	17.062	5.7782	8.0086
Delta-1-pyrroline-5-carboxylate synthase OS=Homo sapiens GN=ALDH18A1 PE=1 SV=2	P5CS_HUMAN	87 kDa	0	3.1369	3.7542	2.29703	9.5133	3.8147	3.7651	5.6977	2.4084	0.3065	1.8459	1.52027	0.907	1.5217	0.91839	1.1157	8.1796	10.275	7.9588	8.80447	0	10.937	5.0032	5.3134
40S ribosomal protein S18 OS=Homo sapiens GN=RPS18 PE=1 SV=3	RS18_HUMAN	18 kDa	1.1466	2.2087	3.1986	2.18463	0.64806	1.3622	1.4767	1.16232	1.5052	1.8738	1.0548	1.47793	0.60467	0.60869	0.80694	0.673433	3.5786	3.7087	5.3328	4.2067	4.7736	5.6163	6.8755	5.75513
Ras-related protein Rab-2A OS=Homo sapiens GN=RAB2A PE=1 SV=1	RAB2A_HUMAN	24 kDa	1.8931	1.257	2.959	2.03637	1.3871	2.394	4.0172	2.59943	0.90315	1.602	1.5189	1.34135	1.8829	2.1527	1.4563	1.83063	1.4837	1.5349	3.4015	2.14003	2.9934	2.6313	2.0988	2.5745
Protein transport protein Sec61 subunit beta OS=Homo sapiens GN=SEC61B PE=1 SV=2	SC61B_HUMAN	10 kDa	1.7322	2.2206	2.1094	2.02073	1.2961	1.6525	3.5069	2.15183	2.1073	1.5325	1.8459	1.82857	1.814	2.7391	1.6139	2.05567	2.9675	2.3024	2.3264	2.5321	0	2.2214	2.5101	1.57717
Sulfotransferase 1A1 OS=Homo sapiens GN=SULT1A1 PE=1 SV=3	ST1A1_HUMAN	34 kDa	2.4005	1.8736	2.7811	2.35173	1.4781	1.1123	0.77994	1.12345	3.3204	5.0148	4.3597	4.23163	1.6839	1.8818	0.91839	1.4947	1.1057	3.324	4.3885	2.9394	0	3.053	0.84372	1.29891
Thioredoxin domain-containing protein 5 OS=Homo sapiens GN=TXNDC5 PE=1 SV=2	TXND5_HUMAN	48 kDa	3.8936	3.4419	4.2334	3.8563	1.1086	0	0	0.369533	2.3785	4.0605	3.9659	3.4683	0	0	0.3247	0.108233	2.7642	3.4515	6.339	4.1849	1.6199	1.9172	1.6839	1.74033
Squalene monooxygenase OS=Homo sapiens GN=SQLE PE=1 SV=3	ERG1_HUMAN	64 kDa	7.3662	13.348	8.8733	9.8625	3.3146	0.37076	13.472	5.71912	0.33979	0.68255	1.6525	0.891613	1.3127	1.5775	4.3066	2.39893	0	19.17	11.811	10.327	2.0249	3.8053	16.723	7.51773
Heterogeneous nuclear ribonucleoprotein D0 OS=Homo sapiens GN=HNRNPD PE=1 SV=1	HNRPD_HUMAN	38 kDa	3.4644	4.7525	4.5201	4.24567	5.3609	6.6243	5.8954	5.9602	3.3115	2.7585	2.637	2.90233	2.721	3.0434	3.0145	2.9263	0.49458	0	2.3264	0.940327	0	0.74046	0.8367	0.52572
Guanine nucleotide-binding protein G(I)/G(S)/G(T) subunit beta-2 OS=Homo sapiens GN=GNB2 PE=1 SV=3	GBB2_HUMAN	37 kDa	5.6794	6.5964	3.9247	5.40017	5.594	6.3515	8.5076	6.8177	4.4471	47.845	24.082	25.458	10.791	7.3362	16.495	11.5407	4.3063	3.9638	2.9139	3.728	7.2492	6.0426	5.0413	6.11103
Epithelial cell adhesion molecule OS=Homo sapiens GN=EPCAM PE=1 SV=2	EPCAM_HUMAN	35 kDa	4.1717	4.6176	1.6302	3.47317	2.0352	3.7783	1.7721	2.52853	2.1461	2.215	1.9795	2.11353	2.9478	2.532	3.6329	3.03757	1.1057	1.4063	1.4628	1.32493	1.4028	0	0.8367	0.7465
FACT complex subunit SSRP1 OS=Homo sapiens GN=SSRP1 PE=1 SV=1	SSRP1_HUMAN	81 kDa	0	2.6616	2.4809	1.71417	2.5276	0.66098	7.2349	3.47449	0.6021	0.3065	0.5274	0.478667	1.6696	1.5966	1.6386	1.63493	0.91913	9.2115	5.9046	5.34508	6.9672	18.771	15.66	13.7994
Nuclear pore complex protein Nup93 OS=Homo sapiens GN=NUP93 PE=1 SV=2	NUP93_HUMAN	93 kDa	3.5666	2.1789	1.8153	2.52027	0.69356	3.216	1.5599	1.82315	3.6989	3.6149	2.774	3.3626	1.2438	2.1862	3.7293	2.38643	1.8383	0	0.71563	0.85131	2.0249	1.1503	1.2621	1.4791
Monocarboxylate transporter 1 OS=Homo sapiens GN=SLC16A1 PE=1 SV=3	MOT1_HUMAN	54 kDa	0.80017	3.3308	1.9785	2.03649	2.5776	2.4564	3.502	2.84533	3.4455	2.5698	2.6262	2.8805	2.1987	1.9982	2.3437	2.1802	8.734	5.7531	1.4313	5.30613	1.6199	1.1371	5.4255	2.7275
Membrane-associated progesterone receptor component 2 OS=Homo sapiens GN=PGRMC2 PE=1 SV=1	PGRC2_HUMAN	24 kDa	3.3862	2.8432	3.1369	3.1221	3.0073	3.0549	2.8473	2.96983	2.1848	3.1693	2.31	2.5547	1.8829	3.0769	2.857	2.6056	6.7209	3.8373	3.8774	4.81187	5.7989	2.618	3.7792	4.06537
Vesicle-associated membrane protein 8 OS=Homo sapiens GN=VAMP8 PE=1 SV=1	VAMP8_HUMAN	11 kDa	1.1466	3.6014	2.5047	2.41757	4.0012	4.8724	2.89	3.9212	4.4737	6.9573	4.9853	5.4721	3.0503	4.0267	3.3329	3.46997	6.5622	2.8125	2.1469	3.84053	0.40497	0	5.334	1.91299
Vesicle-associated membrane protein-associated protein B/C OS=Homo sapiens GN=VAPB PE=1 SV=3	VAPB_HUMAN	27 kDa	3.3862	1.8796	2.055	2.44027	3.1847	4.0332	2.5405	3.2528	2.6796	2.9324	1.1216	2.24453	1.6494	2.8172	2.1615	2.20937	3.5786	1.9186	2.6261	2.70777	5.6111	2.3007	5.0518	4.3212
Transforming protein RhoA OS=Homo sapiens GN=RHOA PE=1 SV=1	RHOA_HUMAN	22 kDa	6.0502	2.7082	4.1349	4.29777	6.8119	7.208	0.59068	4.87019	16.309	1.2956	1.9795	6.52803	5.386	4.7326	4.4645	4.86103	0	0.76708	0.48762	0.418233	0	2.2788	1.6288	1.30253
Sodium/potassium-transporting ATPase subunit beta-3 OS=Homo sapiens GN=ATP1B3 PE=1 SV=1	AT1B3_HUMAN	32 kDa	1.6003	1.8676	2.418	1.96197	2.1262	2.9258	1.3706	2.14087	2.3785	2.9672	1.322	2.22257	1.6494	2.4905	1.9482	2.02937	2.2114	1.7901	1.363	1.78817	2.8055	1.1503	1.2621	1.7393
Flotillin-2 OS=Homo sapiens GN=FLOT2 PE=1 SV=2	FLOT2_HUMAN	47 kDa	1.2003	2.8313	2.8355	2.28903	1.7111	2.1037	0.59068	1.46849	2.8257	2.5563	2.0463	2.4761	2.8932	23.821	3.8868	10.2003	0.49458	1.0226	0.97523	0.830803	0	0	1.6804	0.560133
40S ribosomal protein S6 OS=Homo sapiens GN=RPS6 PE=1 SV=1	RS6_HUMAN	29 kDa	2.0786	1.9034	2.1094	2.03047	1.9442	1.6525	2.3627	1.98647	1.8063	1.5325	1.5822	1.64033	0.907	0.91303	1.0759	0.96531	2.4729	3.0698	2.7142	2.7523	2.3713	1.8512	1.6734	1.9653
Synaptosomal-associated protein 23 OS=Homo sapiens GN=SNAP23 PE=1 SV=1	SNP23_HUMAN	23 kDa	0.80017	2.0857	2.1799	1.68859	3.9967	3.2332	4.2201	3.81667	2.6884	2.8068	2.4259	2.64037	1.2782	3.9741	3.6329	2.96173	3.4385	2.3016	1.819	2.5197	2.8055	2.2742	5.804	3.6279
Retinol dehydrogenase 11 OS=Homo sapiens GN=RDH11 PE=1 SV=2	RDH11_HUMAN	35 kDa	0	2.7142	6.9528	3.22233	6.6177	5.6292	4.9877	5.74487	0	0.95427	0.81738	0.59055	7.1877	6.7443	1.3342	5.08873	11.908	10.452	8.0123	10.1241	10.402	6.8033	12.968	10.0578
T-complex protein 1 subunit zeta OS=Homo sapiens GN=CCT6A PE=1 SV=3	TCPZ_HUMAN	58 kDa	4.9878	2.4674	1.955	3.13673	1.3871	1.0317	0.98065	1.13315	2.6796	4.3499	3.3243	3.45127	1.2782	1.2397	0.3247	0.947533	2.7574	4.7308	6.0959	4.52803	0	1.4941	1.6288	1.04097
60S ribosomal protein L35a OS=Homo sapiens GN=RPL35A PE=1 SV=2	RL35A_HUMAN	13 kDa	1.7322	2.2206	1.808	1.92027	1.6201	1.6525	1.4767	1.5831	3.0105	2.1455	1.8459	2.33397	0.907	1.8261	0.80694	1.18001	2.9675	1.5349	2.3264	2.27627	0.59282	2.2214	2.0917	1.63531
Histone H1x OS=Homo sapiens GN=H1FX PE=1 SV=1	H1X_HUMAN	22 kDa	1.8931	1.2511	1.3288	1.491	0.97209	1.0317	0.98065	0.994813	1.6989	1.602	2.31	1.8703	2.8243	2.4794	1.5121	2.27193	3.7534	2.8127	2.3382	2.9681	1.8077	1.1371	3.7897	2.24483
Small nuclear ribonucleoprotein Sm D3 OS=Homo sapiens GN=SNRPD3 PE=1 SV=1	SMD3_HUMAN	14 kDa	4.0644	3.2961	2.4577	3.27273	3.1757	3.0368	4.8108	3.67443	3.2518	5.5015	6.5127	5.08867	9.0994	6.3215	6.8786	7.43317	0	0	2.5945	0.864833	0	0	0.41835	0.13945
CCAAT/enhancer-binding protein zeta OS=Homo sapiens GN=CEBPZ PE=1 SV=3	CEBPZ_HUMAN	121 kDa	0.34644	6.0513	4.0798	3.49251	9.5351	3.3138	4.9398	5.92957	1.2817	1.9781	1.8494	1.70307	3.2989	2.2499	5.2962	3.615	0	0	2.8941	0.9647	0	0	0	0
Core histone macro-H2A.2 OS=Homo sapiens GN=H2AFY2 PE=1 SV=3	H2AW_HUMAN	40 kDa	8.813	17.091	24.655	16.853	4.9914	11.078	26.366	14.1451	5.2042	18.362	19.93	14.4987	18.129	18.191	26.405	20.9083	4.8591	5.8817	10.228	6.9896	14.88	9.437	11.754	12.0237
Transmembrane emp24 domain-containing protein 4 OS=Homo sapiens GN=TMED4 PE=1 SV=1	TMED4_HUMAN	26 kDa	4.3718	4.0942	3.2603	3.90877	3.5042	2.0232	2.4574	2.6616	2.6021	3.4758	3.1679	3.08193	5.044	2.1639	4.7495	3.9858	3.5786	2.6851	0	2.0879	4.179	3.3453	3.3503	3.62487
Dolichyl-diphosphooligosaccharide--protein glycosyltransferase subunit STT3B OS=Homo sapiens GN=STT3B PE=1 SV=1	STT3B_HUMAN	94 kDa	0.69288	2.0916	13.417	5.40049	0.64806	0.66098	11.461	4.25668	0.6021	0.91949	0.5274	0.682997	0.60467	0.91303	1.0759	0.864533	0.49458	25.675	0	8.72319	1.7785	15.512	5.7266	7.67237
NADH dehydrogenase [ubiquinone] 1 beta subcomplex subunit 10 OS=Homo sapiens GN=NDUFB10 PE=1 SV=3	NDUBA_HUMAN	21 kDa	0.74652	1.2511	1.6302	1.20927	1.0176	0.66098	0.98065	0.88641	2.1848	1.226	0.7911	1.40063	2.522	2.7614	1.4563	2.24657	3.6369	3.1964	3.0138	3.28237	1.9956	0.74046	5.0413	2.59245
Nuclear mitotic apparatus protein 1 OS=Homo sapiens GN=NUMA1 PE=1 SV=2	NUMA1_HUMAN	238 kDa	1.2003	3.0255	1.3523	1.85937	4.7892	3.1576	4.8726	4.27313	1.5529	0.98905	1.3853	1.30908	6.0334	3.9326	9.0841	6.35003	0	0	0	0	0	0	0	0
60S acidic ribosomal protein P2 OS=Homo sapiens GN=RPLP2 PE=1 SV=1	RLA2_HUMAN	12 kDa	2.586	1.8915	1.2054	1.8943	1.3416	2.0635	1.5713	1.6588	2.4859	1.602	0.7911	1.62633	1.2438	1.8261	1.7253	1.5984	1.4837	0.76745	1.551	1.26738	3.1812	2.618	4.201	3.3334
Cytochrome c oxidase protein 20 homolog OS=Homo sapiens GN=COX20 PE=1 SV=2	COX20_HUMAN	13 kDa	0.34644	1.827	1.6154	1.26295	3.6772	4.5017	4.0927	4.09053	4.1727	4.1264	3.0868	3.7953	4.0262	4.6577	3.9266	4.2035	4.5957	1.5342	1.4313	2.5204	3.839	1.1371	3.2869	2.75433
Transcriptional repressor CTCF OS=Homo sapiens GN=CTCF PE=1 SV=1	CTCF_HUMAN	83 kDa	0	2.5025	6.9289	3.1438	20.231	15.786	11.551	15.856	0	5.7791	1.9116	2.56357	14.166	5.2957	7.6642	9.04197	3.9243	11.841	4.222	6.66243	27.53	0	16.18	14.57
Filamin-B OS=Homo sapiens GN=FLNB PE=1 SV=2	FLNB_HUMAN	278 kDa	13.07	14.841	9.0856	12.3322	6.6246	4.8599	0.29534	3.92661	3.7078	1.2608	5.1822	3.3836	1.6696	0.30434	8.3035	3.42581	0	0	4.0622	1.35407	0	6.023	0.8367	2.28657
Mitochondrial import receptor subunit TOM70 OS=Homo sapiens GN=TOMM70 PE=1 SV=1	TOM70_HUMAN	67 kDa	2.3469	2.1908	1.0275	1.85507	4.0193	2.5953	2.5405	3.0517	2.3398	1.2956	2.0463	1.8939	2.8932	2.806	3.6886	3.12927	0.55285	0	0	0.184283	0.40497	0.38344	0.84372	0.544043
Reticulocalbin-1 OS=Homo sapiens GN=RCN1 PE=1 SV=1	RCN1_HUMAN	39 kDa	33.776	32.875	31.734	32.795	3.6796	3.9144	16.008	7.86733	0	0	0	0	0	0.30434	0	0.101447	0	4.1471	0	1.38237	0	0	0	0
Granulins OS=Homo sapiens GN=GRN PE=1 SV=2	GRN_HUMAN	64 kDa	2.3322	20.144	9.9234	10.7999	0	0.85742	10.799	3.88547	1.7466	1.8873	1.6348	1.75623	0	0	0	0	17.535	29.618	27.443	24.8653	0	10.476	22.668	11.048
Probable ergosterol biosynthetic protein 28 OS=Homo sapiens GN=C14orf1 PE=1 SV=1	ERG28_HUMAN	16 kDa	0.80017	1.5564	2.418	1.59152	0.36953	1.7733	1.7606	1.30114	1.6989	2.0477	2.8408	2.1958	1.6839	2.1973	1.6235	1.8349	2.2114	0.76745	0.97523	1.31803	3.6448	2.6841	1.6874	2.6721
40S ribosomal protein S2 OS=Homo sapiens GN=RPS2 PE=1 SV=2	RS2_HUMAN	31 kDa	2.8251	2.2087	2.8973	2.6437	1.6656	2.5904	0.59068	1.61556	1.8063	1.5673	1.7158	1.69647	0.30233	1.544	1.9943	1.28021	1.4837	3.9638	2.5262	2.6579	2.5884	0.76689	1.255	1.53676
cTAGE family member 5 OS=Homo sapiens GN=CTAGE5 PE=1 SV=4	CTGE5_HUMAN	91 kDa	0	5.2329	4.7287	3.32053	4.4106	6.4867	4.9877	5.295	0.87328	1.8873	1.6348	1.46513	3.0503	2.7344	0	1.92823	23.284	17.835	4.5059	15.2083	21.971	4.9255	16.558	14.4848
NADH dehydrogenase [ubiquinone] 1 subunit C2 OS=Homo sapiens GN=NDUFC2 PE=1 SV=1	NDUC2_HUMAN	14 kDa	1.1661	4.436	2.5047	2.70227	4.4072	5.1445	4.5368	4.69617	4.3664	3.7745	2.4521	3.531	3.8129	3.3431	3.0082	3.38807	7.5514	7.6709	3.3101	6.17747	2.0194	0	4.4903	2.1699
Receptor expression-enhancing protein 6 OS=Homo sapiens GN=REEP6 PE=1 SV=1	REEP6_HUMAN	21 kDa	2.2932	5.908	6.3796	4.86027	2.1262	1.733	1.5713	1.81017	0	0.68255	0.85789	0.51348	0.63911	2.175	0.64941	1.15451	13.072	7.3836	2.5187	7.6581	4.8046	7.5816	10.084	7.49007
Isoleucine--tRNA ligase, cytoplasmic OS=Homo sapiens GN=IARS PE=1 SV=2	SYIC_HUMAN	145 kDa	4.1106	9.0027	6.5493	6.5542	5.8866	8.6862	0	4.8576	4.7808	7.3251	9.8216	7.30917	7.1877	8.1115	5.3869	6.89537	20.526	6.3047	10.411	12.4139	5.992	4.5421	12.351	7.62837
Ras-related protein Ral-A OS=Homo sapiens GN=RALA PE=1 SV=1	RALA_HUMAN	24 kDa	1.093	1.5742	1.9315	1.5329	0.73906	1.7733	1.1814	1.23125	1.9613	0.68255	0.92468	1.18951	1.0103	2.1639	1.1874	1.45387	3.1423	1.7901	1.8506	2.261	0.59282	0.74046	2.0917	1.14166
Adenylate kinase 4, mitochondrial OS=Homo sapiens GN=AK4 PE=1 SV=1	KAD4_HUMAN	25 kDa	4.6645	1.7744	1.5537	2.6642	2.2036	0	0.90736	1.03699	1.3592	5.4007	5.2348	3.99823	4.5754	4.1016	5.4784	4.71847	4.2411	8.2942	1.6508	4.7287	3.029	7.9415	4.945	5.30517
Protein transport protein Sec23A OS=Homo sapiens GN=SEC23A PE=1 SV=2	SC23A_HUMAN	86 kDa	1.1661	1.7744	5.0301	2.65687	0.64806	1.9572	1.8147	1.47332	0	0	0	0	0	0.6836	0	0.227867	8.4005	9.4612	12.133	9.99823	4.6196	7.935	5.8621	6.1389
Apoptosis-inducing factor 2 OS=Homo sapiens GN=AIFM2 PE=1 SV=1	AIFM2_HUMAN	41 kDa	3.7716	2.0857	2.2416	2.69963	2.5321	2.0453	1.8147	2.1307	4.3664	3.7745	7.1464	5.09577	8.6526	4.406	6.4599	6.50617	4.2294	4.7304	3.9659	4.30857	1.4028	1.5057	2.865	1.9245
Staphylococcal nuclease domain-containing protein 1 OS=Homo sapiens GN=SND1 PE=1 SV=1	SND1_HUMAN	102 kDa	2.2932	5.1637	3.3308	3.5959	3.6817	3.5686	3.5753	3.60853	0.98063	1.6262	4.3015	2.30278	3.1401	1.987	1.6386	2.25523	1.1057	1.7897	3.6097	2.16837	1.0097	1.5192	0.81439	1.11443
Ceramide synthase 2 OS=Homo sapiens GN=CERS2 PE=1 SV=1	CERS2_HUMAN	45 kDa	3.8776	3.4363	1.0892	2.80103	8.4523	1.8538	2.5405	4.2822	1.0194	1.7064	1.6525	1.45943	1.0103	3.6283	5.3722	3.33693	0.55285	4.8693	2.4381	2.62008	2.4298	6.0461	1.2363	3.2374
SWI/SNF-related matrix-associated actin-dependent regulator of chromatin subfamily A member 5 OS=Homo sapiens GN=SMARCA5 PE=1 SV=1	SMCA5_HUMAN	122 kDa	1.5662	5.2329	0.62618	2.47509	7.3227	5.3974	10.862	7.8607	0.64084	1.0238	0.59419	0.752943	7.2295	11.259	1.8368	6.7751	0.55285	1.8459	0	0.799583	8.7993	2.271	4.3724	5.14757
Ribosome biogenesis protein BMS1 homolog OS=Homo sapiens GN=BMS1 PE=1 SV=1	BMS1_HUMAN	146 kDa	4.5107	7.1411	8.5102	6.72067	11.047	8.1996	5.1494	8.132	24.599	13.901	6.3957	14.9652	16.509	13.804	8.3312	12.8814	0	0	8.7204	2.9068	2.0194	0	0	0.673133
Calumenin OS=Homo sapiens GN=CALU PE=1 SV=2	CALU_HUMAN	37 kDa	8.6971	6.1442	6.1501	6.99713	0.73906	0.74152	1.1699	0.883493	0.87328	2.9111	4.8552	2.87986	0.67355	0	0.6848	0.452783	4.6025	2.0452	2.9257	3.19113	0	0	0	0
eIF-2-alpha kinase activator GCN1 OS=Homo sapiens GN=GCN1 PE=1 SV=6	GCN1_HUMAN	293 kDa	8.5398	2.0916	5.0918	5.24107	0.64806	4.6156	1.2027	2.15545	8.4172	10.86	8.2319	9.1697	3.1057	1.3672	1.9909	2.1546	1.8383	3.8358	1.4313	2.36847	2.0194	1.1355	0	1.05163
Isocitrate dehydrogenase [NADP], mitochondrial OS=Homo sapiens GN=IDH2 PE=1 SV=2	IDHP_HUMAN	51 kDa	1.493	1.5623	3.4455	2.16693	1.3871	0.74152	0	0.70954	3.5052	4.9453	4.6234	4.35797	1.3127	0.631	1.5121	1.15193	1.1057	1.4063	0.97523	1.16241	0.80995	0.76689	0	0.525613
Cytochrome c oxidase subunit 7A2, mitochondrial OS=Homo sapiens GN=COX7A2 PE=1 SV=1	CX7A2_HUMAN	9 kDa	1.3858	1.2689	0.90402	1.18624	6.0384	0.99147	0.59068	2.54018	1.5052	2.1455	1.5822	1.7443	1.5117	1.8261	1.8829	1.74023	3.5786	0.38373	0.77548	1.57927	3.5569	2.5916	1.255	2.46783
Sodium-dependent multivitamin transporter OS=Homo sapiens GN=SLC5A6 PE=2 SV=2	SC5A6_HUMAN	69 kDa	4.6645	2.0857	1.6154	2.78853	5.0587	4.2871	2.9846	4.11013	5.2397	2.8309	6.3159	4.7955	6.2794	4.9732	4.6468	5.2998	3.6765	0.76708	1.4313	1.95829	1.0097	3.0384	2.4432	2.16377
Beta-2-microglobulin OS=Homo sapiens GN=B2M PE=1 SV=1	B2MG_HUMAN	14 kDa	1.6003	1.5564	0.72614	1.29428	1.1086	2.2246	3.5097	2.28097	1.3592	1.0238	1.322	1.235	1.0103	2.2085	1.6235	1.6141	3.2006	1.2788	1.9505	2.1433	1.6199	3.0675	2.953	2.5468
Phosphoglycerate mutase 1 OS=Homo sapiens GN=PGAM1 PE=1 SV=2	PGAM1_HUMAN	29 kDa	5.8452	4.1714	4.1966	4.73773	0.97209	0	1.9765	0.982863	0.30105	1.2956	3.7478	1.78148	0	0	0	0	2.3911	5.369	9.9821	5.91407	0	9.4938	0	3.1646
Sequestosome-1 OS=Homo sapiens GN=SQSTM1 PE=1 SV=1	SQSTM_HUMAN	48 kDa	8.6288	11.796	12.34	10.9216	2.945	0.33049	8.6171	3.9642	1.2429	0.91949	2.5069	1.55643	0	0	0	0	2.3328	2.6853	0.77548	1.93119	0	3.0384	0	1.0128
Niemann-Pick C1 protein OS=Homo sapiens GN=NPC1 PE=1 SV=2	NPC1_HUMAN	142 kDa	0.34644	1.5802	3.81	1.91221	0.97209	2.1037	4.0714	2.3824	1.845	2.828	2.31	2.32767	1.2438	1.8484	2.7455	1.9459	1.542	0	0.38774	0.643247	0.40497	0.75367	1.2586	0.805747
NADH dehydrogenase [ubiquinone] 1 alpha subcomplex subunit 5 OS=Homo sapiens GN=NDUFA5 PE=1 SV=3	NDUA5_HUMAN	13 kDa	0.80017	0.9517	1.2906	1.01416	0	0.37076	1.7934	0.721387	1.8838	1.9085	1.0548	1.6157	2.8588	2.1639	2.2633	2.42867	4.7426	2.4289	0.97523	2.71558	2.8055	2.2742	2.1023	2.394
Chloride intracellular channel protein 1 OS=Homo sapiens GN=CLIC1 PE=1 SV=4	CLIC1_HUMAN	27 kDa	2.2396	1.5742	2.2946	2.03613	0.73906	0.70125	1.0753	0.838537	3.1267	3.1345	3.6952	3.3188	0	0	1.1874	0.3958	1.4837	0.5113	2.5262	1.50707	0	4.4956	0.41835	1.63798
40S ribosomal protein S12 OS=Homo sapiens GN=RPS12 PE=1 SV=3	RS12_HUMAN	15 kDa	1.6003	1.8676	1.8153	1.76107	1.8476	2.2246	2.3398	2.13733	2.3785	2.7302	1.9829	2.36387	1.6839	1.262	1.6235	1.52313	1.1057	2.0452	1.4628	1.5379	1.6199	1.1503	0.84372	1.20464
Ectonucleotide pyrophosphatase/phosphodiesterase family member 1 OS=Homo sapiens GN=ENPP1 PE=1 SV=2	ENPP1_HUMAN	105 kDa	4.7876	3.1067	5.4755	4.4566	4.3777	5.1426	8.2012	5.90717	3.073	0.94363	0.59419	1.53694	3.9306	2.3171	6.2772	4.17497	3.7725	7.5272	7.1245	6.1414	4.3997	6.0686	8.7156	6.39463
Neuroplastin OS=Homo sapiens GN=NPTN PE=1 SV=2	NPTN_HUMAN	44 kDa	2.3322	3.5488	2.5047	2.79523	2.9381	5.1445	0	2.6942	0	2.8309	2.4521	1.761	4.5754	3.7335	1.3696	3.22617	6.4339	4.858	4.2938	5.19523	6.0581	7.6032	6.5151	6.72547
Ribosome production factor 2 homolog OS=Homo sapiens GN=RPF2 PE=1 SV=2	RPF2_HUMAN	36 kDa	4.1106	6.1201	9.154	6.46157	8.8327	9.9144	2.8838	7.2103	10.933	0	10.375	7.10267	15.049	17.544	10.386	14.3263	2.8534	0	9.4361	4.0965	0	0	0	0
Protein disulfide-isomerase TMX3 OS=Homo sapiens GN=TMX3 PE=1 SV=2	TMX3_HUMAN	52 kDa	1.1661	2.9729	3.2309	2.45663	4.7857	5.0286	0.90736	3.57389	1.7466	3.7745	3.9305	3.15053	3.7238	5.0481	1.3696	3.3805	7.3531	3.3238	2.1469	4.2746	4.4437	3.4218	1.6288	3.16477
Glutamate dehydrogenase 1, mitochondrial OS=Homo sapiens GN=GLUD1 PE=1 SV=2	DHE3_HUMAN	61 kDa	0	0.93978	1.0892	0.676327	0	0.37076	0.29534	0.222033	1.3204	3.708	0.66098	1.89646	0	0	0	0	3.3171	1.7901	12.555	5.8874	1.2149	7.5367	2.1058	3.61913
Radixin OS=Homo sapiens GN=RDX PE=1 SV=1	RADI_HUMAN	69 kDa	1.9663	0.8872	1.6154	1.48963	4.4072	5.1445	3.112	4.22123	3.8329	2.2285	1.6348	2.5654	1.5251	2.7344	1.3696	1.87637	6.0676	3.8354	3.5782	4.49373	3.839	1.9026	5.7007	3.8141
Ezrin OS=Homo sapiens GN=EZR PE=1 SV=4	EZRI_HUMAN	69 kDa	1.9663	0.8872	4.9515	2.60167	3.6726	3.4297	2.2047	3.10233	3.8329	2.2285	1.6348	2.5654	1.5251	2.7344	1.3696	1.87637	4.2294	6.4483	6.1493	5.609	2.8293	1.9026	4.8863	3.20607
DNA-(apurinic or apyrimidinic site) lyase OS=Homo sapiens GN=APEX1 PE=1 SV=2	APEX1_HUMAN	36 kDa	0.34644	0.62255	1.3288	0.76593	0	0.66098	0.98065	0.54721	0.30105	0	0	0.10035	0	0	0	0	3.2006	6.9041	4.4766	4.86043	6.1746	4.2047	6.7357	5.705
Squalene synthase OS=Homo sapiens GN=FDFT1 PE=1 SV=1	FDFT_HUMAN	48 kDa	0	0	0	0	0	0	0	0	4.2683	0	0	1.42277	0.33678	0	0	0.11226	2.5894	6.6499	3.4015	4.2136	6.926	8.912	6.7006	7.51287
Mitochondrial fission 1 protein OS=Homo sapiens GN=FIS1 PE=1 SV=2	FIS1_HUMAN	17 kDa	0.34644	0.63447	1.2054	0.72877	1.6656	1.322	2.0674	1.685	1.2042	2.452	2.5069	2.05437	3.0922	3.3812	2.9127	3.1287	0	0.76745	1.1632	0.64355	0.59282	0.75367	0	0.44883
Cytochrome c oxidase subunit NDUFA4 OS=Homo sapiens GN=NDUFA4 PE=1 SV=1	NDUA4_HUMAN	9 kDa	0	1.9034	1.5067	1.1367	1.9442	1.322	1.1814	1.48253	1.2042	0.91949	1.8459	1.3232	2.7555	1.8261	1.0759	1.88583	1.542	2.3024	1.551	1.79847	1.1856	2.2214	1.6769	1.69463
39S ribosomal protein L12, mitochondrial OS=Homo sapiens GN=MRPL12 PE=1 SV=2	RM12_HUMAN	21 kDa	1.3858	0.63447	0.60268	0.874317	2.0352	2.394	2.2567	2.22863	1.2042	1.9085	1.7158	1.6095	1.8485	1.544	2.2633	1.88527	0	0.76745	1.551	0.772817	3.1812	2.6048	0.42186	2.06929
Solute carrier family 2, facilitated glucose transporter member 3 OS=Homo sapiens GN=SLC2A3 PE=1 SV=1	GTR3_HUMAN	54 kDa	2.1859	3.1604	3.863	3.06977	3.0983	1.4025	2.6581	2.3863	0.94189	0.95427	1.8494	1.24852	2.1852	2.1527	2.319	2.21897	3.1423	1.7901	2.6261	2.5195	2.9641	2.5916	2.5171	2.69093
BAG family molecular chaperone regulator 2 OS=Homo sapiens GN=BAG2 PE=1 SV=1	BAG2_HUMAN	24 kDa	1.9126	4.4946	1.5537	2.65363	2.4866	3.604	1.276	2.45553	5.6481	2.8174	2.6896	3.71837	3.1057	3.2905	2.826	3.07407	0.55285	1.9179	1.4313	1.30068	2.4243	0.37023	1.6288	1.47444
Glutamine--tRNA ligase OS=Homo sapiens GN=QARS PE=1 SV=1	SYQ_HUMAN	88 kDa	3.2214	7.3553	3.4764	4.68437	3.6761	3.4297	4.0803	3.7287	0.67958	1.0238	3.1131	1.60549	6.8574	3.7335	2.019	4.2033	0	9.2294	6.3614	5.19693	5.0264	7.2116	12.637	8.29167
NADH dehydrogenase [ubiquinone] 1 alpha subcomplex subunit 8 OS=Homo sapiens GN=NDUFA8 PE=1 SV=3	NDUA8_HUMAN	20 kDa	0.80017	1.5564	0.72614	1.02757	2.2172	1.1123	0.77994	1.36981	3.0581	1.7064	1.322	2.02883	1.3471	1.893	1.9482	1.72943	3.3171	2.4289	2.4381	2.72803	1.2149	0.76689	2.946	1.6426
Insulin-like growth factor 2 mRNA-binding protein 1 OS=Homo sapiens GN=IGF2BP1 PE=1 SV=2	IF2B1_HUMAN	63 kDa	4.9719	1.2451	3.6087	3.27523	2.1626	1.7148	1.8147	1.89737	0.6021	2.0477	2.1393	1.59637	0.33678	0.631	0	0.322593	2.3328	3.3238	4.5449	3.4005	0	0.38344	0.42186	0.268433
Insulin-like growth factor 2 mRNA-binding protein 3 OS=Homo sapiens GN=IGF2BP3 PE=1 SV=2	IF2B3_HUMAN	64 kDa	0.80017	0.62255	6.0782	2.50031	8.8351	3.9144	0	4.24983	0	1.0238	0.99147	0.671757	1.7969	0	0	0.598967	0	0.5113	3.2868	1.26603	0	0.38344	0.42186	0.268433
Dystrobrevin alpha OS=Homo sapiens GN=DTNA PE=1 SV=2	DTNA_HUMAN	84 kDa	2.2054	1.8389	2.1799	2.07473	2.7652	1.5184	5.4228	3.23547	5.5706	2.7826	2.9533	3.76883	3.497	3.6474	2.9835	3.37597	0.49458	0	0	0.16486	0	0	0	0
Dystrobrevin beta OS=Homo sapiens GN=DTNB PE=1 SV=1	DTNB_HUMAN	71 kDa	2.2054	1.8389	0.30134	1.44855	4.2342	2.3758	3.6081	3.40603	4.6973	2.4761	2.9533	3.37557	3.497	2.2802	4.3531	3.37677	0	0	0	0	0	0.7596	0	0.2532
Alpha-1,3/1,6-mannosyltransferase ALG2 OS=Homo sapiens GN=ALG2 PE=1 SV=1	ALG2_HUMAN	47 kDa	7.7663	8.9155	3.336	6.6726	4.4176	1.9572	3.4683	3.28103	0.64084	0.34128	0.33049	0.437537	0.33678	1.262	3.6145	1.73776	1.9083	4.0913	5.8006	3.9334	4.2321	4.9201	9.9518	6.368
Electron transfer flavoprotein subunit alpha, mitochondrial OS=Homo sapiens GN=ETFA PE=1 SV=1	ETFA_HUMAN	35 kDa	0.34644	1.8974	1.5067	1.25018	0.69356	0.33049	0.98065	0.668233	2.1848	3.3715	2.1096	2.5553	2.1163	1.5217	1.3449	1.66097	0	3.5811	3.1419	2.241	0.59282	0.75367	0.41835	0.58828
116 kDa U5 small nuclear ribonucleoprotein component OS=Homo sapiens GN=EFTUD2 PE=1 SV=1	U5S1_HUMAN	109 kDa	2.1859	7.2196	3.8479	4.4178	6.2204	2.1037	3.8969	4.07367	2.4859	2.5911	2.31	2.46233	2.522	1.8484	2.319	2.2298	2.4729	0	4.0497	2.1742	0	0	0	0
60S ribosomal protein L36 OS=Homo sapiens GN=RPL36 PE=1 SV=3	RL36_HUMAN	12 kDa	1.7322	1.9034	1.2054	1.61367	2.2682	1.6525	2.6581	2.19293	2.4084	0.91949	2.1096	1.8125	1.814	2.1304	1.8829	1.94243	0	0	0.77548	0.258493	0	1.1107	0	0.370233
Stromal interaction molecule 1 OS=Homo sapiens GN=STIM1 PE=1 SV=3	STIM1_HUMAN	77 kDa	0.40008	2.1968	5.4138	2.67023	6.5382	2.1037	11.696	6.7793	1.2429	4.0145	1.9127	2.39003	1.5806	1.2397	1.1316	1.3173	0	0	4.0622	1.35407	1.5906	1.876	3.4413	2.30263
Calcium uniporter protein, mitochondrial OS=Homo sapiens GN=MCU PE=1 SV=1	MCU_HUMAN	40 kDa	4.6645	2.7082	4.4832	3.95197	5.8762	2.9027	2.1249	3.6346	0.67958	0	2.4521	1.04389	3.0503	2.7344	7.4975	4.4274	2.8534	4.6025	0	2.4853	1.0097	6.0768	6.5151	4.53387
Mitochondrial inner membrane protein OXA1L OS=Homo sapiens GN=OXA1L PE=1 SV=3	OXA1L_HUMAN	49 kDa	1.1661	3.2842	1.2524	1.9009	5.1486	7.7148	1.8147	4.8927	8.3127	3.7745	3.5463	5.21117	8.417	2.3137	5.7116	5.48077	2.944	3.3238	2.1469	2.8049	0	1.5073	4.2369	1.91473
Alpha-soluble NSF attachment protein OS=Homo sapiens GN=NAPA PE=1 SV=3	SNAA_HUMAN	33 kDa	0.74652	0.62255	2.5577	1.30892	0.73906	3.1576	2.3726	2.08975	0.6021	2.887	2.7564	2.08183	2.1987	1.9344	1.9633	2.03213	2.7574	0	1.6909	1.48277	1.6199	3.0015	4.5748	3.0654
Aspartate--tRNA ligase, cytoplasmic OS=Homo sapiens GN=DARS PE=1 SV=2	SYDC_HUMAN	57 kDa	1.9468	4.5698	1.7382	2.7516	4.7836	8.4564	1.2973	4.84577	7.052	3.8547	3.2872	4.7313	4.0606	1.9982	2.019	2.6926	2.944	1.5342	1.4313	1.96983	0	0.76689	2.0506	0.939163
Golgi SNAP receptor complex member 2 OS=Homo sapiens GN=GOSR2 PE=1 SV=2	GOSR2_HUMAN	25 kDa	1.1466	2.514	3.8953	2.51863	2.1717	1.1123	3.3533	2.21243	1.6215	1.6716	0.66098	1.31803	1.3127	1.893	1.8925	1.6994	1.1057	0	0	0.368567	1.6199	1.9172	1.6874	1.7415
Ribosomal RNA processing protein 1 homolog B OS=Homo sapiens GN=RRP1B PE=1 SV=3	RRP1B_HUMAN	84 kDa	0	10.593	2.5047	4.3659	7.3522	9.0589	1.8147	6.07527	3.4931	1.8873	9.5984	4.99293	25.875	3.0499	6.7565	11.8938	0	0	8.4799	2.82663	0.40497	0	0.42186	0.27561
Transmembrane and coiled-coil domain-containing protein 1 OS=Homo sapiens GN=TMCO1 PE=1 SV=1	TMCO1_HUMAN	21 kDa	1.3858	1.5802	1.9315	1.6325	0.97209	1.322	1.4767	1.25693	1.2042	1.226	1.3185	1.24957	0.60467	2.1304	1.0759	1.27032	1.9783	2.3024	1.551	1.9439	1.1856	1.8512	2.0917	1.7095
ATP-dependent RNA helicase DDX1 OS=Homo sapiens GN=DDX1 PE=1 SV=2	DDX1_HUMAN	82 kDa	5.3109	16.144	8.8733	10.1094	7.3626	13.7	3.3214	8.128	0.33979	3.4015	11.8	5.18043	7.8612	4.0031	5.6481	5.83747	5.7067	3.6918	1.4628	3.62043	3.9947	2.6545	3.5287	3.39263
Cell growth-regulating nucleolar protein OS=Homo sapiens GN=LYAR PE=1 SV=2	LYAR_HUMAN	44 kDa	0	6.1201	5.7004	3.94017	11.035	9.5436	6.871	9.14987	8.9595	1.8873	3.5463	4.7977	12.797	7.4738	3.0358	7.76887	2.7574	0	6.8649	3.20743	4.0167	2.271	0.81439	2.36736
Signal peptidase complex catalytic subunit SEC11A OS=Homo sapiens GN=SEC11A PE=1 SV=1	SC11A_HUMAN	21 kDa	0.69288	2.2028	2.8973	1.93099	0.97209	0.66098	1.1814	0.938157	0.90315	0.91949	1.7158	1.17948	1.814	0.30434	1.0759	1.06475	0.98916	2.8127	1.6508	1.81755	1.4028	2.261	2.5241	2.06263
Beta-1-syntrophin OS=Homo sapiens GN=SNTB1 PE=1 SV=3	SNTB1_HUMAN	58 kDa	3.7863	4.9986	2.1784	3.65443	4.4253	2.1843	2.3398	2.98313	0.6021	0	1.322	0.641367	1.9518	0.631	1.8368	1.4732	0.55285	0	2.4381	0.996983	0.40497	2.6695	1.2656	1.44669
Pescadillo homolog OS=Homo sapiens GN=PES1 PE=1 SV=1	PESC_HUMAN	68 kDa	2.3127	2.7261	2.4812	2.50667	4.9733	5.1224	4.6834	4.92637	2.3487	2.5698	2.8231	2.58053	2.8378	2.6069	2.019	2.4879	0	0	1.819	0.606333	0	0	2.0608	0.686933
FAS-associated factor 2 OS=Homo sapiens GN=FAF2 PE=1 SV=2	FAF2_HUMAN	53 kDa	0.40008	6.1667	5.23	3.93226	2.1717	1.1123	7.9386	3.74087	0	0.95427	1.1216	0.691957	1.2782	1.544	1.7253	1.51583	0	4.0909	0.97523	1.68871	1.6199	3.8126	2.0506	2.49437
Phosphoglycerate kinase 1 OS=Homo sapiens GN=PGK1 PE=1 SV=3	PGK1_HUMAN	45 kDa	0.40008	1.5564	1.4523	1.13626	0	0	0.29534	0.0984467	1.0194	0.68255	0.99147	0.897807	0	0	0	0	1.1057	1.0226	4.6764	2.26823	0	16.622	2.953	6.525
Calcium-binding mitochondrial carrier protein SCaMC-1 OS=Homo sapiens GN=SLC25A24 PE=1 SV=2	SCMC1_HUMAN	53 kDa	3.4788	1.8796	1.0892	2.1492	4.0557	2.5953	0.77994	2.47698	1.6215	0.64778	1.1884	1.15256	2.0207	1.893	0.97411	1.62927	3.2588	1.1512	0	1.47	0.80995	1.1371	1.6839	1.21032
ATP synthase protein 8 OS=Homo sapiens GN=MT-ATP8 PE=1 SV=1	ATP8_HUMAN	8 kDa	1.6003	0.62255	1.0892	1.10402	1.8476	1.4428	1.0753	1.45523	2	0.98905	2.1798	1.72295	0.97589	1.5552	2.1615	1.5642	2.1531	2.8127	0	1.65527	2.4298	1.1503	2.1058	1.8953
Pre-mRNA-splicing factor ATP-dependent RNA helicase DHX15 OS=Homo sapiens GN=DHX15 PE=1 SV=2	DHX15_HUMAN	91 kDa	0.74652	3.1245	24.588	9.48634	5.8047	5.2766	7.0498	6.0437	0.64084	1.9085	3.0332	1.86085	6.2978	7.6651	7.8523	7.27173	0	0	2.359	0.786333	0	0	0	0
Succinate dehydrogenase [ubiquinone] iron-sulfur subunit, mitochondrial OS=Homo sapiens GN=SDHB PE=1 SV=3	SDHB_HUMAN	32 kDa	0	0.8872	0	0.295733	0	0.85742	3.4698	1.44241	0	0	0	0	3.0503	1.3146	1.6943	2.01973	6.0094	4.9866	11.674	7.55667	6.234	12.493	11.068	9.93167
Dehydrogenase/reductase SDR family member 7 OS=Homo sapiens GN=DHRS7 PE=1 SV=1	DHRS7_HUMAN	38 kDa	0.80017	0.31127	1.0275	0.71298	2.0807	1.072	1.666	1.60623	0.67958	2.3889	3.2381	2.10219	2.6942	3.1438	1.5121	2.45003	3.3171	1.0226	0.97523	1.77164	0.40497	0	0.84372	0.41623
Enoyl-CoA hydratase, mitochondrial OS=Homo sapiens GN=ECHS1 PE=1 SV=4	ECHM_HUMAN	31 kDa	5.5328	2.1728	4.8427	4.18277	3.5931	10.923	1.8818	5.46597	0.6021	3.3319	4.3505	2.7615	11.386	8.266	3.2801	7.64403	5.7067	9.9969	0.77548	5.49303	1.9973	2.271	8.8218	4.36337
Protein THEM6 OS=Homo sapiens GN=THEM6 PE=1 SV=2	THEM6_HUMAN	24 kDa	1.5467	1.257	4.2201	2.34127	1.7566	0.99147	5.6121	2.78672	0.6021	1.602	0.66098	0.955027	1.9518	1.544	1.9943	1.83003	0	1.0226	0.97523	0.665943	0.80995	4.1887	1.2656	2.08808
Receptor of activated protein C kinase 1 OS=Homo sapiens GN=RACK1 PE=1 SV=3	RACK1_HUMAN	35 kDa	1.9663	2.1323	2.3416	2.14673	1.4691	1.7148	0	1.0613	4.28	0.68255	1.6348	2.19912	0.76257	0	1.3696	0.710723	3.5086	6.6488	2.9224	4.35993	2.0194	4.8909	2.4725	3.1276
39S ribosomal protein L37, mitochondrial OS=Homo sapiens GN=MRPL37 PE=1 SV=2	RM37_HUMAN	48 kDa	2.7323	4.1714	2.2416	3.04843	2.2036	5.1445	3.112	3.4867	2.0863	1.8873	1.9653	1.97963	2.6245	4.4171	2.7392	3.26027	5.5148	3.8354	3.3501	4.23343	3.029	2.2788	2.4432	2.58367
Exportin-2 OS=Homo sapiens GN=CSE1L PE=1 SV=3	XPO2_HUMAN	110 kDa	31.795	3.9473	21.399	19.0471	1.7931	1.7148	0	1.1693	82.336	54.641	13.092	50.023	0.60467	85.86	33.847	40.1039	2.3328	1.9183	50.256	18.169	2.0194	10.157	58.979	23.7185
Guanine nucleotide-binding protein subunit alpha-11 OS=Homo sapiens GN=GNA11 PE=1 SV=2	GNA11_HUMAN	42 kDa	3.1324	1.5098	0.36307	1.66842	1.3871	1.1123	1.0753	1.19157	3.2994	2.5698	1.8089	2.55937	2.4465	2.6818	1.6032	2.24383	4.1711	3.5796	2.8625	3.53773	5.2536	1.5338	1.2621	2.68317
GPI transamidase component PIG-T OS=Homo sapiens GN=PIGT PE=1 SV=1	PIGT_HUMAN	66 kDa	1.1661	1.1985	1.2524	1.20567	8.4478	8.8797	0	5.77583	3.8329	2.8309	3.6	3.42127	4.5754	14.375	4.7272	7.89253	3.6765	4.9917	5.6533	4.77383	6.0581	1.9026	3.6794	3.88003
Mitochondrial import receptor subunit TOM22 homolog OS=Homo sapiens GN=TOMM22 PE=1 SV=3	TOM22_HUMAN	16 kDa	2.2054	1.9034	1.2054	1.7714	1.2961	0.99147	1.7721	1.35322	2.1073	1.226	0.5274	1.2869	0.60467	1.2174	2.1518	1.32462	1.4837	0.76745	0.77548	1.00888	0	2.5916	2.4878	1.69313
Inactive hydroxysteroid dehydrogenase-like protein 1 OS=Homo sapiens GN=HSDL1 PE=1 SV=3	HSDL1_HUMAN	37 kDa	3.0251	1.2044	1.2524	1.8273	2.9426	2.943	2.5947	2.82677	2.6884	5.0701	3.7969	3.8518	3.0503	3.8992	3.6576	3.5357	1.1057	1.1512	1.4313	1.2294	0	0.75367	2.4655	1.07306
ER membrane protein complex subunit 8 OS=Homo sapiens GN=EMC8 PE=1 SV=1	EMC8_HUMAN	24 kDa	0	63.172	51.122	38.098	0	0	65.939	21.9797	0	0	0.66098	0.220327	0.33678	0	0	0.11226	0	11.463	4.222	5.22833	0	41.999	74.404	38.801
Ragulator complex protein LAMTOR1 OS=Homo sapiens GN=LAMTOR1 PE=1 SV=2	LTOR1_HUMAN	18 kDa	2.3469	1.8736	2.3563	2.19227	1.8476	2.5148	1.1699	1.8441	1.0194	1.8738	1.5857	1.49297	1.9173	1.5775	3.6736	2.38947	0	0	0	0	0	0	0.42186	0.14062
Utrophin OS=Homo sapiens GN=UTRN PE=1 SV=2	UTRO_HUMAN	394 kDa	7.2772	6.8298	15.181	9.76267	5.0622	0	4.9079	3.32337	2.2236	3.5347	1.3448	2.3677	2.7345	0.6836	0.86266	1.42692	0	0	1.4313	0.4771	0	3.0306	0	1.0102
Enoyl-CoA delta isomerase 2, mitochondrial OS=Homo sapiens GN=ECI2 PE=1 SV=4	ECI2_HUMAN	44 kDa	4.2449	2.397	3.5087	3.38353	1.8386	0.37076	1.6873	1.29889	0.67958	1.3651	2.9567	1.66713	2.9613	2.9973	3.0639	3.0075	0	3.0683	3.5782	2.2155	2.0194	3.4218	3.2576	2.8996
Non-histone chromosomal protein HMG-17 OS=Homo sapiens GN=HMGN2 PE=1 SV=3	HMGN2_HUMAN	9 kDa	0	1.7744	1.112	0.962133	6.6177	5.6292	2.7221	4.98967	3.4931	14.65	5.1811	7.77473	3.0503	8.4762	7.0531	6.1932	15.09	6.7601	1.4313	7.76047	7.0017	0	0	2.3339
Rho-related GTP-binding protein RhoG OS=Homo sapiens GN=RHOG PE=1 SV=1	RHOG_HUMAN	21 kDa	24.343	0	40.803	21.7153	0	0	34.698	11.566	1.0194	0.34128	0	0.45356	0	0	0.3247	0.108233	0	0	0	0	0	23.945	4.1215	9.3555
Growth hormone-inducible transmembrane protein OS=Homo sapiens GN=GHITM PE=1 SV=2	GHITM_HUMAN	37 kDa	1.0393	1.2689	1.5067	1.27163	0.32403	0.66098	0.88603	0.62368	2.1461	1.839	1.3853	1.79013	1.8829	1.5217	1.4006	1.60173	2.0366	1.1512	4.0497	2.4125	0.59282	1.1107	0.8367	0.84674
NADH dehydrogenase [ubiquinone] flavoprotein 2, mitochondrial OS=Homo sapiens GN=NDUFV2 PE=1 SV=2	NDUV2_HUMAN	27 kDa	1.0393	0.9517	0.90402	0.965007	1.2961	0.66098	0.88603	0.947703	1.2042	1.226	1.3185	1.24957	1.2093	1.2174	1.6139	1.34687	3.4621	1.9186	1.551	2.31057	3.5569	2.5916	2.5101	2.8862
Signal recognition particle receptor subunit alpha OS=Homo sapiens GN=SRPRA PE=1 SV=2	SRPRA_HUMAN	70 kDa	2.952	1.2451	0.72614	1.64108	2.8562	1.4428	1.0753	1.79143	1.6989	1.2956	2.1131	1.70253	1.9173	0.94649	2.1058	1.65653	0	0	0	0	1.6199	0.76689	3.7639	2.05023
Mitochondrial Rho GTPase 2 OS=Homo sapiens GN=RHOT2 PE=1 SV=2	MIRO2_HUMAN	68 kDa	3.2556	7.4057	6.8124	5.82457	3.6796	6.6131	8.3224	6.20503	2.0387	1.3651	0.99147	1.46509	5.9225	0.94649	2.9651	3.27803	0	0	0	0	1.6199	3.0379	2.6011	2.41963
Signal peptidase complex subunit 3 OS=Homo sapiens GN=SPCS3 PE=1 SV=1	SPCS3_HUMAN	20 kDa	0.69288	0.31723	0.90402	0.638043	0.64806	1.322	1.7721	1.24739	1.2042	1.226	1.0548	1.16167	0.907	1.5217	1.6139	1.34753	1.9783	1.9186	1.9387	1.9452	1.1856	1.8512	2.5101	1.84897
ATP synthase subunit delta, mitochondrial OS=Homo sapiens GN=ATP5D PE=1 SV=2	ATPD_HUMAN	17 kDa	1.3858	1.9034	1.2054	1.4982	1.2961	1.322	1.1814	1.2665	1.5052	0.613	1.3185	1.14557	1.2093	1.2174	1.6139	1.34687	2.4729	1.5349	2.3264	2.1114	0	1.1107	2.0917	1.06747
Plakophilin-2 OS=Homo sapiens GN=PKP2 PE=1 SV=2	PKP2_HUMAN	97 kDa	0	7.147	1.4751	2.87403	0	0	1.1814	0.3938	13.967	6.3921	6.0652	8.8081	16.172	16.392	10.535	14.3663	2.8534	1.8459	0	1.56643	17.976	0	14.115	10.697
ATP synthase subunit f, mitochondrial OS=Homo sapiens GN=ATP5J2 PE=1 SV=3	ATPK_HUMAN	11 kDa	0.69288	0.63447	1.5067	0.944683	4.4798	0.66098	2.9748	2.70519	0	0.94363	1.9127	0.95211	0.60467	0.60869	1.8164	1.00992	0	1.5339	1.1632	0.899033	4.3669	1.4809	2.5171	2.7883
Rho-related GTP-binding protein RhoB OS=Homo sapiens GN=RHOB PE=1 SV=1	RHOB_HUMAN	22 kDa	5.8111	2.7787	1.9168	3.5022	5.8807	6.7435	1.6873	4.7705	0.6021	0.34128	0.66098	0.534787	1.0103	0.9991	1.6386	1.216	2.4729	2.6853	0.38774	1.84865	0	1.5001	1.6734	1.05783
MICOS complex subunit MIC26 OS=Homo sapiens GN=APOO PE=1 SV=1	MIC26_HUMAN	22 kDa	6.166	7.4057	3.4764	5.6827	7.6832	9.8741	4.6039	7.38707	0.30105	1.5914	2.9795	1.62398	4.5754	6.0316	11.636	7.41433	0	1.5342	1.4313	0.9885	3.029	0	1.6288	1.5526
Mitochondrial import inner membrane translocase subunit Tim9 OS=Homo sapiens GN=TIMM9 PE=1 SV=1	TIM9_HUMAN	10 kDa	1.093	1.2451	0	0.779367	1.8476	2.144	1.5599	1.8505	2.8345	1.9433	1.5857	2.12117	1.0103	1.5552	2.2526	1.60603	1.1057	1.9176	0	1.00777	1.4028	1.1371	1.6804	1.40677
ADP-ribosylation factor-like protein 8B OS=Homo sapiens GN=ARL8B PE=1 SV=1	ARL8B_HUMAN	22 kDa	5.5342	1.5683	4.01	3.70417	0.69356	2.0635	6.5528	3.10329	0.30105	0.91949	0.5274	0.582647	0	1.2397	0.97411	0.737937	1.6003	0.76745	2.5262	1.63132	0.80995	1.5073	0.84372	1.05366
Cleft lip and palate transmembrane protein 1 OS=Homo sapiens GN=CLPTM1 PE=1 SV=1	CLPT1_HUMAN	76 kDa	1.1466	0.93978	0.60268	0.896353	1.7566	1.4025	1.7606	1.6399	0.94189	0.98905	1.2552	1.06205	1.2782	1.544	1.5121	1.44477	1.1057	1.4063	1.2631	1.25837	2.0249	0.76689	3.3643	2.05203
60S ribosomal protein L24 OS=Homo sapiens GN=RPL24 PE=1 SV=1	RL24_HUMAN	18 kDa	1.3858	0.9517	1.5067	1.2814	1.6201	1.322	1.1814	1.3745	0.90315	1.839	1.5822	1.44145	0.907	1.2174	0.80694	0.977113	0.98916	1.5349	1.1632	1.22909	1.1856	1.8512	1.255	1.4306
Sulfotransferase 1A3 OS=Homo sapiens GN=SULT1A3 PE=1 SV=1	ST1A3_HUMAN (+1)	34 kDa	0.80017	2.7082	2.7046	2.07099	0.73906	0	1.8147	0.851253	1.6989	3.6845	4.1628	3.18207	1.0103	1.262	0.97411	1.08214	0	2.5568	3.1537	1.9035	0	1.5338	0.84372	0.792507
Desmoglein-2 OS=Homo sapiens GN=DSG2 PE=1 SV=2	DSG2_HUMAN	122 kDa	2.6787	1.2451	2.055	1.99293	2.4502	1.8135	0.29534	1.51968	1.2429	1.5325	0.7911	1.18883	2.2541	2.4794	2.7348	2.48943	0	0	0	0	1.1856	1.1239	0.84021	1.0499
Transmembrane protein 33 OS=Homo sapiens GN=TMEM33 PE=1 SV=2	TMM33_HUMAN	28 kDa	1.1466	1.257	1.5302	1.31127	1.7111	1.322	1.666	1.56637	0.30105	1.226	0.7911	0.772717	0.60467	0.91303	2.2076	1.24177	0.98916	1.1512	0	0.713453	2.3713	2.2478	2.939	2.51937
DNA topoisomerase 2-alpha OS=Homo sapiens GN=TOP2A PE=1 SV=3	TOP2A_HUMAN	174 kDa	0	0	0	0	6.5615	2.394	5.6832	4.87957	0.30105	0.613	0.2637	0.392583	5.7788	5.2934	9.4937	6.8553	0	0	0	0	3.774	0.76689	2.9425	2.49446
Heterogeneous nuclear ribonucleoprotein A0 OS=Homo sapiens GN=HNRNPA0 PE=1 SV=1	ROA0_HUMAN	31 kDa	8.3044	4.7049	5.7401	6.2498	4.4854	6.9416	1.7721	4.3997	4.1251	2.3542	5.4099	3.96307	4.2605	3.4562	4.2469	3.98787	0	0	1.9505	0.650167	11.984	0	0	3.99467
Small nuclear ribonucleoprotein Sm D2 OS=Homo sapiens GN=SNRPD2 PE=1 SV=1	SMD2_HUMAN	14 kDa	0.40008	0.31127	1.0275	0.579617	2.1262	3.216	1.0753	2.13917	1.0194	2.0477	1.9829	1.68333	2.3574	2.5017	1.7253	2.1948	0	0	3.1137	1.0379	0.80995	0	0	0.269983
Up-regulated during skeletal muscle growth protein 5 OS=Homo sapiens GN=USMG5 PE=1 SV=1	USMG5_HUMAN	6 kDa	0.69288	1.2689	0.90402	0.955267	3.0528	1.733	2.6466	2.47747	0.90315	1.839	0.5274	1.08985	1.2093	2.1304	0.53796	1.29255	0.98916	0.38373	0.77548	0.716123	2.3713	0.74046	0.8367	1.31615
60S ribosomal protein L34 OS=Homo sapiens GN=RPL34 PE=1 SV=3	RL34_HUMAN	13 kDa	1.3858	1.2689	0.90402	1.18624	1.2961	0.99147	1.4767	1.25476	1.2042	0.91949	1.0548	1.0595	1.2093	0.91303	1.0759	1.06608	0.98916	1.5349	1.9387	1.48759	2.3713	1.8512	1.255	1.82583
ATP-citrate synthase OS=Homo sapiens GN=ACLY PE=1 SV=3	ACLY_HUMAN	121 kDa	3.4775	2.1912	5.3248	3.6645	0	3.1537	0	1.05123	0	0.94363	0	0.314543	0	0	0	0	9.6868	20.303	18.867	16.2856	0	21.452	0	7.15067
Heterogeneous nuclear ribonucleoprotein H3 OS=Homo sapiens GN=HNRNPH3 PE=1 SV=2	HNRH3_HUMAN	37 kDa	0.74652	2.52	3.1369	2.13447	1.6201	3.0549	3.6387	2.77123	6.3248	1.602	1.4521	3.1263	1.814	2.4347	3.1226	2.4571	0	0	0.77548	0.258493	0	0	0	0
Lysophospholipid acyltransferase 5 OS=Homo sapiens GN=LPCAT3 PE=1 SV=1	MBOA5_HUMAN	56 kDa	2.1859	1.8855	2.6576	2.243	1.7111	1.4025	0.98065	1.36475	0.6021	1.5673	1.9795	1.38297	2.4876	1.544	2.319	2.11687	0	0	0	0	0	0	0	0
40S ribosomal protein S25 OS=Homo sapiens GN=RPS25 PE=1 SV=1	RS25_HUMAN	14 kDa	0.69288	0.31723	0.30134	0.43715	0.64806	0.33049	0.59068	0.523077	0.90315	1.226	0.5274	0.885517	0.30233	0.60869	1.1316	0.680873	1.4837	3.1974	2.7142	2.4651	5.7696	3.3321	1.6734	3.5917
Translocating chain-associated membrane protein 1 OS=Homo sapiens GN=TRAM1 PE=1 SV=3	TRAM1_HUMAN	43 kDa	1.6003	1.5564	2.1784	1.77837	1.4781	1.483	1.9499	1.637	1.3592	1.7064	1.322	1.46253	1.3471	3.5791	0.97411	1.96677	1.1057	1.0226	0	0.709433	1.2149	1.1503	0.84372	1.06964
WD repeat-containing protein 43 OS=Homo sapiens GN=WDR43 PE=1 SV=3	WDR43_HUMAN	75 kDa	1.9663	3.9067	5.1094	3.6608	6.2002	3.8004	0.29534	3.43198	2.0863	0	0	0.695433	4.4864	5.7843	3.3886	4.5531	0	0	3.8378	1.27927	0	1.5192	0	0.5064
Carcinoembryonic antigen-related cell adhesion molecule 1 OS=Homo sapiens GN=CEACAM1 PE=1 SV=2	CEAM1_HUMAN	58 kDa	0.69288	1.257	0.96575	0.971877	0.36953	3.8147	0.59068	1.59164	1.544	0.98905	1.4521	1.32838	6.118	0.60869	4.6007	3.7758	0	1.7901	2.1384	1.3095	12.097	2.9775	0.8367	5.30373
General transcription factor II-I OS=Homo sapiens GN=GTF2I PE=1 SV=2	GTF2I_HUMAN	112 kDa	0	2.0857	3.5939	1.8932	3.6772	2.0856	2.0773	2.61337	2.0863	2.8309	3.2695	2.7289	4.3629	4.049	3.0082	3.8067	1.8383	0.76708	0	0.86846	2.0194	1.143	4.1013	2.42123
Probable C-mannosyltransferase DPY19L1 OS=Homo sapiens GN=DPY19L1 PE=2 SV=1	D19L1_HUMAN	77 kDa	1.5126	9.021	15.945	8.8262	4.0036	7.9572	6.9396	6.30013	0.67958	0.64778	7.6463	2.99122	7.8612	3.6876	8.9249	6.82457	0	3.6918	3.2868	2.3262	0	4.5421	3.5287	2.69027
40S ribosomal protein S20 OS=Homo sapiens GN=RPS20 PE=1 SV=1	RS20_HUMAN	13 kDa	1.8395	1.8796	1.3288	1.68263	0.36953	0.66098	0.68531	0.57194	1.3592	0.98905	0.92468	1.09098	0	0	0.64941	0.21647	5.1789	2.0452	2.1384	3.12083	1.6199	1.8908	3.3679	2.29287
ATP synthase subunit a OS=Homo sapiens GN=MT-ATP6 PE=1 SV=1	ATP6_HUMAN	25 kDa	1.3858	0.9517	0.30134	0.879613	1.6201	1.322	0.88603	1.27604	1.5052	1.839	1.0548	1.46633	0.907	1.8261	1.6139	1.449	0	1.1512	1.551	0.900733	1.1856	1.4809	1.255	1.30717
Small subunit processome component 20 homolog OS=Homo sapiens GN=UTP20 PE=1 SV=3	UTP20_HUMAN	318 kDa	3.5325	8.2058	3.4764	5.07157	7.5898	5.0286	8.3685	6.99563	0.30105	0	0.66098	0.320677	3.9612	3.7224	2.3234	3.33567	0	0	0	0	0	2.271	0	0.757
Protein LYRIC OS=Homo sapiens GN=MTDH PE=1 SV=2	LYRIC_HUMAN	64 kDa	0.34644	1.7744	0.36307	0.82797	1.4691	3.4297	0	1.63293	3.2994	2.535	4.0869	3.3071	3.6549	4.4171	4.9715	4.34783	0.98916	0.76745	2.1469	1.30117	3.205	0.74046	4.8863	2.94392
Nucleolar protein 6 OS=Homo sapiens GN=NOL6 PE=1 SV=2	NOL6_HUMAN	128 kDa	6.9661	4.9682	4.8287	5.58767	5.5182	3.8866	5.0344	4.81307	0.30105	1.2956	1.1216	0.906083	3.7238	2.0508	2.2323	2.66897	0	0.76708	1.4313	0.732793	0	0.38344	0.81439	0.399277
Glutamine--fructose-6-phosphate aminotransferase [isomerizing] 1 OS=Homo sapiens GN=GFPT1 PE=1 SV=3	GFPT1_HUMAN	79 kDa	5.3915	3.866	3.857	4.3715	2.2071	0	1.8147	1.3406	3.2607	2.8763	4.5915	3.57617	0	0	0.6848	0.228267	2.944	3.0683	4.813	3.60843	0	1.9099	0	0.636633
Atlastin-2 OS=Homo sapiens GN=ATL2 PE=1 SV=2	ATLA2_HUMAN	66 kDa	0	0	1.8785	0.626167	2.9381	3.7602	3.3128	3.33703	4.3963	2.8068	2.9795	3.3942	3.6549	3.7224	1.9076	3.09497	4.5957	0	3.2503	2.61533	1.1856	0.74046	0	0.64202
T-complex protein 1 subunit gamma OS=Homo sapiens GN=CCT3 PE=1 SV=4	TCPG_HUMAN	61 kDa	2.6397	0.62255	1.9932	1.75182	0.36953	0	0	0.123177	0.67958	0.91949	1.0548	0.884623	0	0.631	0.26898	0.299993	0	3.8353	4.4766	2.77063	0	5.2361	1.2656	2.16723
NADH dehydrogenase [ubiquinone] iron-sulfur protein 5 OS=Homo sapiens GN=NDUFS5 PE=1 SV=3	NDUS5_HUMAN	13 kDa	0	0.63447	0.30134	0.311937	0	1.5184	0.88603	0.801477	0.87328	0	0.5274	0.466893	3.6415	1.5966	0.53796	1.92535	2.8274	4.8591	4.1454	3.94397	4.5666	1.4809	0.8367	2.29473
Plexin-B2 OS=Homo sapiens GN=PLXNB2 PE=1 SV=3	PLXB2_HUMAN	205 kDa	7.3321	8.7817	16.872	10.9953	53.834	6.729	10.339	23.634	0.33979	0	0	0.113263	2.2877	0.6836	1.3696	1.44697	0	0	0	0	0	7.1819	0.81439	2.66543
Nuclear pore complex protein Nup160 OS=Homo sapiens GN=NUP160 PE=1 SV=3	NU160_HUMAN	162 kDa	0	6.5735	17.295	7.95617	0.64806	0.33049	17.112	6.03018	0	0.613	0.5274	0.380133	2.4321	1.9759	0.53796	1.64865	0	9.6169	0	3.20563	0	15.336	6.1823	7.17277
Peroxisomal trans-2-enoyl-CoA reductase OS=Homo sapiens GN=PECR PE=1 SV=2	PECR_HUMAN	33 kDa	0.80017	2.0857	1.2524	1.37942	2.2036	5.0286	2.5947	3.27563	0.67958	1.7064	1.4784	1.28813	2.9613	0.3155	0.3247	1.2005	0.91913	3.8354	4.2938	3.01611	2.8293	3.0457	3.2576	3.0442
Dolichol-phosphate mannosyltransferase subunit 1 OS=Homo sapiens GN=DPM1 PE=1 SV=1	DPM1_HUMAN	30 kDa	1.1466	0.31127	1.3288	0.92889	4.0467	2.4564	13.753	6.75203	0.67958	0.68255	1.7158	1.02598	0.97589	0.93534	1.1874	1.03288	0	0	0	0	0.40497	6.4313	0.84021	2.55883
Guanine nucleotide-binding protein G(I)/G(S)/G(O) subunit gamma-5 OS=Homo sapiens GN=GNG5 PE=1 SV=3	GBG5_HUMAN	7 kDa	5.8306	0.62255	2.4415	2.96488	1.8431	1.5989	1.2973	1.57977	1.2042	0	0	0.4014	0.67355	0.631	4.6114	1.97198	1.9783	2.1738	1.7507	1.9676	0	2.2405	3.3022	1.84757
Prostaglandin E synthase 3 OS=Homo sapiens GN=PTGES3 PE=1 SV=1	TEBP_HUMAN	19 kDa	9.7449	2.6616	6.4228	6.27643	1.4691	0	3.173	1.54737	0	0.3065	1.8985	0.735	0	0	0	0	8.2722	9.0768	1.4313	6.2601	0	2.2788	4.072	2.11693
Citrate synthase, mitochondrial OS=Homo sapiens GN=CS PE=1 SV=2	CISY_HUMAN	52 kDa	0	0.31127	0.30134	0.204203	1.8021	1.1123	1.5599	1.49143	1.5827	2.5215	2.31	2.13807	1.9862	1.2397	0.3247	1.18353	0	1.7901	0.38774	0.725947	0	4.1254	0	1.37513
Trans-Golgi network integral membrane protein 2 OS=Homo sapiens GN=TGOLN2 PE=1 SV=2	TGON2_HUMAN	51 kDa	0	2.4841	2.224	1.56937	8.3312	6.3305	1.8147	5.49213	2.9596	0.3065	0.5274	1.2645	3.6244	5.348	5.6205	4.8643	3.252	1.5342	1.4313	2.0725	1.9973	1.5057	5.2091	2.90403
40S ribosomal protein S23 OS=Homo sapiens GN=RPS23 PE=1 SV=3	RS23_HUMAN	16 kDa	0	0	1.2524	0.417467	6.8552	5.6292	2.7221	5.06883	6.2263	1.8873	4.0737	4.06243	4.387	2.7344	5.3869	4.16943	8.3682	4.6025	2.1469	5.0392	0	0	2.4432	0.8144
Nucleobindin-1 OS=Homo sapiens GN=NUCB1 PE=1 SV=4	NUCB1_HUMAN	54 kDa	7.3551	9.6336	6.8164	7.93503	6.9787	9.4611	7.0194	7.81973	0	0.94363	0.81738	0.587003	0.76257	1.3672	0.6848	0.93819	7.8485	10.996	7.7643	8.8696	5.0264	4.5272	10.315	6.62287
WD repeat-containing protein 36 OS=Homo sapiens GN=WDR36 PE=1 SV=1	WDR36_HUMAN	105 kDa	5.0109	5.6345	7.1755	5.9403	4.6482	0	9.848	4.83207	1.2817	1.602	1.0548	1.31283	0.30233	0.61984	1.3696	0.763923	0	0.76708	1.1034	0.623493	0	0.76689	0.81439	0.527093
DDB1- and CUL4-associated factor 13 OS=Homo sapiens GN=DCAF13 PE=1 SV=2	DCA13_HUMAN	51 kDa	3.2214	10.864	6.0635	6.7163	12.516	9.5436	2.3664	8.142	3.2994	1.8873	1.6348	2.27383	11.183	2.0508	1.3696	4.8678	0	0.38373	1.4313	0.60501	0	0	0	0
Guanine nucleotide-binding protein subunit alpha-13 OS=Homo sapiens GN=GNA13 PE=1 SV=2	GNA13_HUMAN	44 kDa	4.8035	4.3457	11.148	6.76573	0.64806	0.33049	8.6059	3.19482	0	0	0	0	0	0.6836	0.6848	0.456133	3.3102	14.911	14.366	10.8624	3.029	6.0613	5.2931	4.79447
Peroxisomal membrane protein 11B OS=Homo sapiens GN=PEX11B PE=1 SV=1	PX11B_HUMAN	28 kDa	1.2003	0.31127	0	0.503857	1.1086	1.7733	1.3706	1.4175	1.2817	1.6368	1.5857	1.5014	1.3127	1.8707	1.5121	1.56517	2.5894	0.38373	1.2631	1.41208	1.9956	0.38344	0	0.793013
Very long-chain acyl-CoA synthetase OS=Homo sapiens GN=SLC27A2 PE=1 SV=2	S27A2_HUMAN	70 kDa	2.0004	3.4179	8.6506	4.68963	4.3731	4.6156	6.6413	5.21	0.30105	1.602	1.7826	1.22855	0.33678	0.3155	1.5121	0.72146	0	0	1.4313	0.4771	12.365	0	2.0506	4.8052
Calcium-binding mitochondrial carrier protein Aralar1 OS=Homo sapiens GN=SLC25A12 PE=1 SV=2	CMC1_HUMAN	75 kDa	4.3182	5.0519	3.8013	4.39047	4.7184	3.7562	4.324	4.2662	5.6513	4.0888	6.6627	5.4676	5.0785	4.3166	7.3835	5.59287	1.542	2.8137	3.8891	2.74827	3.3691	3.3849	2.9355	3.22983
Acetolactate synthase-like protein OS=Homo sapiens GN=ILVBL PE=1 SV=2	ILVBL_HUMAN	68 kDa	1.2003	0.62255	0.72614	0.849663	0.32403	0.66098	3.7027	1.56257	0.30105	1.2956	1.8494	1.14868	2.5564	0.93534	2.1615	1.88441	1.4837	0.5113	0.97523	0.990077	1.6199	1.143	0.84372	1.20221
Histone deacetylase 2 OS=Homo sapiens GN=HDAC2 PE=1 SV=2	HDAC2_HUMAN	55 kDa	0	1.5098	1.9785	1.16277	3.2712	6.2357	5.4519	4.98627	1.0194	0.68255	0.66098	0.787643	1.8619	0.94649	1.2988	1.36906	0	1.9234	2.111	1.3448	1.2149	1.4966	0.84372	1.18507
Histone deacetylase 1 OS=Homo sapiens GN=HDAC1 PE=1 SV=1	HDAC1_HUMAN	55 kDa	0.40008	1.821	0.36307	0.861383	2.9017	4.6367	4.5445	4.02763	0.33979	1.3651	0.66098	0.788623	1.5251	0.631	1.2988	1.15163	0	1.9234	2.111	1.3448	1.2149	1.4966	1.2656	1.3257
T-complex protein 1 subunit eta OS=Homo sapiens GN=CCT7 PE=1 SV=2	TCPH_HUMAN	59 kDa	1.493	153.83	63.57	72.9643	0	12.171	0	4.057	0.87328	0.3065	22.455	7.87826	26.861	0	3.3576	10.0729	86.368	0	59.58	48.6493	52.62	25.018	77.067	51.5683
WD repeat-containing protein 1 OS=Homo sapiens GN=WDR1 PE=1 SV=4	WDR1_HUMAN	66 kDa	8.6861	4.7939	6.0748	6.51827	0.73906	0.74152	0	0.493527	2.7659	3.2524	3.4436	3.15397	0	0	0	0	0.91913	3.3238	3.1221	2.45501	0	0.7596	0	0.2532
40S ribosomal protein S24 OS=Homo sapiens GN=RPS24 PE=1 SV=1	RS24_HUMAN	15 kDa	1.093	3.3427	3.8953	2.777	2.9381	4.1712	0.29534	2.46821	2.8345	2.8415	1.1479	2.27463	0	0.60869	1.3342	0.64763	0	0	2.1785	0.726167	0.80995	1.1371	0.42186	0.789637
Nucleolar transcription factor 1 OS=Homo sapiens GN=UBTF PE=1 SV=1	UBF1_HUMAN	89 kDa	0	0	1.8785	0.626167	2.2036	2.5723	2.7221	2.49933	0.87328	1.8873	1.6348	1.46513	3.0503	3.418	2.3791	2.94913	5.5148	3.0683	4.5059	4.363	1.6199	3.0384	3.6794	2.77923
WD repeat-containing protein 18 OS=Homo sapiens GN=WDR18 PE=1 SV=2	WDR18_HUMAN	47 kDa	0	7.6299	4.1201	3.91667	7.3112	2.4564	1.9826	3.91673	6.6795	0	3.1131	3.2642	6.8919	1.9982	1.9909	3.627	0	1.5342	1.4313	0.9885	0	0	0	0
Sphingomyelin phosphodiesterase 4 OS=Homo sapiens GN=SMPD4 PE=1 SV=2	NSMA3_HUMAN	93 kDa	7.8651	6.2034	3.107	5.72517	1.8386	0.74152	6.9396	3.17324	0.67958	1.6262	0.33049	0.878757	0.67355	1.9982	1.3342	1.33532	1.1057	7.6935	0	2.93307	11.419	5.9863	6.6041	8.00313
NADH dehydrogenase [ubiquinone] iron-sulfur protein 6, mitochondrial OS=Homo sapiens GN=NDUFS6 PE=1 SV=1	NDUS6_HUMAN	14 kDa	1.1661	1.7744	0.62618	1.18889	4.4141	5.6292	1.8147	3.95267	3.4931	5.5498	5.4579	4.8336	1.5251	3.7369	6.3683	3.87677	3.6765	4.3471	2.6345	3.5527	3.9947	1.5057	3.5287	3.0097
Dipeptidase 1 OS=Homo sapiens GN=DPEP1 PE=1 SV=3	DPEP1_HUMAN	46 kDa	1.8395	2.1908	1.0275	1.68593	1.0176	0.70125	0.29534	0.671397	2	1.5914	1.7158	1.76907	4.2866	1.2397	3.9576	3.1613	0	0	0	0	0	1.1355	0	0.3785
MICOS complex subunit MIC25 OS=Homo sapiens GN=CHCHD6 PE=1 SV=1	MIC25_HUMAN	26 kDa	2.3322	4.436	2.5047	3.09097	2.9381	2.5723	1.8147	2.4417	0	0	1.6348	0.544933	0	0	2.7392	0.913067	3.6765	1.5342	1.4313	2.214	4.2439	4.1814	7.7772	5.40083
Transmembrane 9 superfamily member 1 OS=Homo sapiens GN=TM9SF1 PE=2 SV=2	TM9S1_HUMAN	69 kDa	0.40008	0.8872	2.5047	1.26399	1.8386	1.7148	0	1.18447	0.33979	0	0.2637	0.201163	4.5754	3.3654	1.3696	3.10347	1.1057	3.0683	2.8625	2.3455	4.4437	7.2066	3.2869	4.97907
5'-3' exoribonuclease 2 OS=Homo sapiens GN=XRN2 PE=1 SV=1	XRN2_HUMAN	109 kDa	0	3.0601	8.2978	3.78597	6.6212	5.6292	16.755	9.66847	0	0	1.6348	0.544933	11.001	8.4762	4.0173	7.8315	0	0	9.8678	3.28927	0	0	0	0
Manganese-transporting ATPase 13A1 OS=Homo sapiens GN=ATP13A1 PE=1 SV=2	AT131_HUMAN	133 kDa	0.40008	1.5564	1.0275	0.99466	2.8562	1.0317	0.77994	1.55595	0.94189	1.2956	1.4521	1.22986	1.2782	1.2397	1.5678	1.3619	0	1.5339	0	0.5113	1.1856	1.5073	1.2621	1.31833
Pleiotropic regulator 1 OS=Homo sapiens GN=PLRG1 PE=1 SV=1	PLRG1_HUMAN	57 kDa	6.166	10.864	8.1472	8.3924	17.667	10.643	12.692	13.6673	0	0	1.6348	0.544933	5.119	2.7344	3.0358	3.62973	0	0	0	0	0	0	0	0
Complement component 1 Q subcomponent-binding protein, mitochondrial OS=Homo sapiens GN=C1QBP PE=1 SV=1	C1QBP_HUMAN	31 kDa	0	2.8074	2.418	1.7418	0.73906	1.072	2.5947	1.46859	0	0.68255	0.92468	0.535743	1.3127	0.631	1.1874	1.0437	1.1057	1.9176	2.7259	1.9164	0	0.38344	1.2656	0.54968
Eukaryotic translation initiation factor 3 subunit A OS=Homo sapiens GN=EIF3A PE=1 SV=1	EIF3A_HUMAN	167 kDa	6.4429	3.9473	6.9289	5.77303	4.4141	3.672	5.1361	4.4074	1.7466	2.2285	2.729	2.2347	2.5595	5.7418	3.0358	3.77903	0	0	7.0487	2.34957	0	14.635	0	4.87833
Heparan sulfate 2-O-sulfotransferase 1 OS=Homo sapiens GN=HS2ST1 PE=1 SV=1	HS2ST_HUMAN	42 kDa	3.2214	2.1912	10.995	5.4692	0.73906	2.6987	10.799	4.74559	0	0.3065	0.33049	0.21233	0.33678	0.631	0.64941	0.539063	0	0	1.4313	0.4771	6.824	14.253	7.6502	9.57573
40S ribosomal protein S10 OS=Homo sapiens GN=RPS10 PE=1 SV=1	RS10_HUMAN	19 kDa	0	1.8796	1.2671	1.0489	0.73906	0.74152	1.0753	0.85196	2.3785	0.34128	0.66098	1.12692	1.0103	0.631	0.59368	0.744993	2.2114	1.2788	1.363	1.61773	1.6199	1.5073	1.6874	1.60487
Double-stranded RNA-specific adenosine deaminase OS=Homo sapiens GN=ADAR PE=1 SV=4	DSRAD_HUMAN	136 kDa	5.4988	3.0255	0.72614	3.08348	2.2126	2.8271	2.8572	2.6323	2.6884	0.94363	0.99147	1.54117	2.5355	2.6292	0	1.72157	0	0.76708	1.4313	0.732793	0	0	0	0
RuvB-like 1 OS=Homo sapiens GN=RUVBL1 PE=1 SV=1	RUVB1_HUMAN	50 kDa	0.40008	0.93382	0.60268	0.645527	0.32403	1.072	0.88603	0.760687	2.2623	2.5563	1.2552	2.0246	2.4876	0.60869	2.2633	1.78653	1.1057	0	0.48762	0.531107	0	0	0.84021	0.28007
Adenosylhomocysteinase OS=Homo sapiens GN=AHCY PE=1 SV=4	SAHH_HUMAN	48 kDa	1.2003	2.9729	2.6047	2.2593	0	11.513	0.29534	3.93611	0.33979	2.8763	0.81738	1.34449	0	0	0	0	0.55285	2.5568	2.9822	2.03062	0	8.7153	2.5018	3.73903
Casein kinase II subunit alpha OS=Homo sapiens GN=CSNK2A1 PE=1 SV=1	CSK21_HUMAN	45 kDa	4.6645	6.1568	15.307	8.70943	2.9381	0.85742	1.8147	1.87007	2.2324	0.34128	2.4521	1.67526	0	0	1.3696	0.456533	0	6.148	10.851	5.66633	0	9.0247	0.81439	3.2797
Small nuclear ribonucleoprotein Sm D1 OS=Homo sapiens GN=SNRPD1 PE=1 SV=1	SMD1_HUMAN	13 kDa	0.74652	1.2511	1.3905	1.12937	1.4326	6.1829	4.0129	3.87613	0.98063	6.7559	3.064	3.60018	0.97589	3.5568	1.6032	2.0453	0	0	0	0	0	0	0	0
Talin-1 OS=Homo sapiens GN=TLN1 PE=1 SV=3	TLN1_HUMAN	270 kDa	1.3858	4.8345	6.4434	4.22123	1.4725	0	0.90736	0.793287	0	0.613	1.3448	0.6526	0	0	0.26898	0.08966	3.6765	3.0683	4.6815	3.80877	4.0387	4.941	3.2576	4.0791
Contactin-5 OS=Homo sapiens GN=CNTN5 PE=1 SV=2	CNTN5_HUMAN	121 kDa	6.4429	2.6616	5.8408	4.98177	1.4725	3.4297	4.5368	3.14633	3.4931	1.8873	3.2695	2.8833	3.0503	11.53	2.0544	5.5449	0	0	2.1469	0.715633	0	0	0	0
Fibrinogen gamma chain OS=Homo sapiens GN=FGG PE=1 SV=3	FIBG_HUMAN	52 kDa	0	0	0	0	0	0	0	0	0	0	0	0	0	0	0	0	3.8048	4.2186	5.5286	4.51733	3.2398	4.2047	7.0473	4.8306
Heterogeneous nuclear ribonucleoprotein Q OS=Homo sapiens GN=SYNCRIP PE=1 SV=2	HNRPQ_HUMAN	70 kDa	5.4648	5.6685	4.3106	5.14797	3.6553	4.4172	5.0094	4.36063	3.088	2.1455	3.5617	2.93173	3.429	3.6856	3.8772	3.66393	0.49458	0	4.5647	1.68643	0	0	0	0
DNA topoisomerase 2-beta OS=Homo sapiens GN=TOP2B PE=1 SV=3	TOP2B_HUMAN	183 kDa	1.6003	2.1789	3.932	2.5704	4.9969	2.3537	3.5326	3.62773	0.90315	1.9085	1.3853	1.39898	4.535	2.4571	4.1461	3.71273	0	0	0	0	2.3713	0.38344	3.3608	2.03851
Carboxypeptidase D OS=Homo sapiens GN=CPD PE=1 SV=2	CBPD_HUMAN	153 kDa	0	2.1728	2.224	1.4656	4.4176	10.116	1.5865	5.37337	14.006	16.313	3.8231	11.3807	4.1985	6.7409	4.1951	5.04483	5.7067	0	0	1.90223	7.9894	2.271	4.3689	4.87643
Guanine nucleotide-binding protein-like 3 OS=Homo sapiens GN=GNL3 PE=1 SV=2	GNL3_HUMAN	62 kDa	1.8931	1.8855	1.5684	1.78233	1.7566	0.66098	0.98065	1.13274	3.3204	0.613	0.33049	1.4213	2.1852	1.544	0.80694	1.51205	0	0	0	0	0	0	0	0
Neuroblastoma-amplified sequence OS=Homo sapiens GN=NBAS PE=1 SV=2	NBAS_HUMAN	269 kDa	0	0	3.4764	1.1588	2.2036	1.7148	0.90736	1.60859	2.0863	4.7181	2.4521	3.0855	2.2877	4.1016	3.0358	3.1417	1.8383	1.5342	2.1469	1.8398	2.0194	7.2198	1.6288	3.62267
Pinin OS=Homo sapiens GN=PNN PE=1 SV=4	PININ_HUMAN	82 kDa	9.3142	2.1728	4.4039	5.29697	3.9626	3.0292	2.5671	3.1863	1.6215	1.2956	0.59419	1.17043	1.7385	1.2397	1.0759	1.35137	0	0	1.9787	0.659567	0	0	0	0
60S ribosomal protein L22 OS=Homo sapiens GN=RPL22 PE=1 SV=2	RL22_HUMAN	15 kDa	1.7322	0.63447	2.2328	1.53316	1.2961	1.322	0.59068	1.06959	1.2042	0.91949	0.5274	0.883697	0.60467	0.91303	0.80694	0.77488	1.4837	1.1512	1.1632	1.26603	0	0.74046	0.8367	0.52572
Transcriptional repressor protein YY1 OS=Homo sapiens GN=YY1 PE=1 SV=2	TYY1_HUMAN	45 kDa	0	7.4608	3.7094	3.7234	10.101	0	11.317	7.13933	0	0	0	0	0.76257	0	0	0.25419	0	15.387	16.924	10.7703	20.865	6.7459	10.304	12.6383
Cytochrome c oxidase assembly factor 3 homolog, mitochondrial OS=Homo sapiens GN=COA3 PE=1 SV=1	COA3_HUMAN	12 kDa	0.40008	0.31127	0	0.237117	1.4736	1.072	1.1699	1.2385	1.3204	1.6262	0.66098	1.20253	0.67355	0.631	1.8722	1.05892	1.472	1.7901	0.38774	1.21661	1.8077	2.261	4.5455	2.8714
NADH dehydrogenase [ubiquinone] 1 alpha subcomplex assembly factor 4 OS=Homo sapiens GN=NDUFAF4 PE=1 SV=1	NDUF4_HUMAN	20 kDa	1.1661	2.6616	2.2416	2.0231	1.4691	1.7148	0	1.0613	0	0	1.6348	0.544933	0.76257	1.3672	1.3696	1.16646	6.4339	3.0683	1.9189	3.80703	5.0484	4.1887	5.7524	4.9965
CDGSH iron-sulfur domain-containing protein 2 OS=Homo sapiens GN=CISD2 PE=1 SV=1	CISD2_HUMAN	15 kDa	0.74652	0.62851	0.72614	0.70039	0.69356	0.74152	0	0.47836	0.90315	1.6368	0.59419	1.04471	0.97589	1.2397	1.5121	1.24256	0.98916	2.1738	1.363	1.50865	1.4028	2.6313	0.41835	1.48415
SRA stem-loop-interacting RNA-binding protein, mitochondrial OS=Homo sapiens GN=SLIRP PE=1 SV=1	SLIRP_HUMAN	12 kDa	4.1106	4.3457	4.5884	4.34823	4.7416	4.2449	4.0803	4.3556	0	0.95427	0.33049	0.428253	0	0.30434	0.6848	0.329713	6.6258	11.219	2.2067	6.68383	0	4.9333	8.6862	4.53983
Proliferation-associated protein 2G4 OS=Homo sapiens GN=PA2G4 PE=1 SV=3	PA2G4_HUMAN	44 kDa	6.9967	2.0857	2.3416	3.808	0.73453	0.37076	1.6873	0.930863	0	0	1.1479	0.382633	0	0	1.3696	0.456533	0.49458	1.0226	3.9574	1.82486	0.80995	4.5457	5.334	3.56322
Actin-related protein 2 OS=Homo sapiens GN=ACTR2 PE=1 SV=1	ARP2_HUMAN	45 kDa	0.69288	1.8974	1.5684	1.38623	0.97209	1.322	0.88603	1.06004	0.90315	0	0.7911	0.56475	0	0.91303	0.53796	0.483663	0.49458	1.2788	1.551	1.10813	0	0.76689	0	0.25563
Golgin subfamily B member 1 OS=Homo sapiens GN=GOLGB1 PE=1 SV=2	GOGB1_HUMAN	376 kDa	0	0.8872	4.0622	1.6498	0.73453	0.85742	3.173	1.58832	0.87328	3.0602	1.9116	1.94836	3.3221	4.0303	3.6823	3.67823	14.171	9.6848	6.3614	10.0724	8.9991	1.1355	8.8218	6.3188
NF-X1-type zinc finger protein NFXL1 OS=Homo sapiens GN=NFXL1 PE=1 SV=2	NFXL1_HUMAN	101 kDa	1.1661	5.1457	2.3644	2.89207	5.8832	4.2871	0.90736	3.69255	1.2131	4.1158	2.7826	2.70383	2.1987	1.9982	1.3696	1.8555	3.3102	0	1.9189	1.74303	0.80995	0.7596	0	0.523183
Protein transport protein Sec31A OS=Homo sapiens GN=SEC31A PE=1 SV=3	SC31A_HUMAN	133 kDa	2.3322	2.5025	6.0635	3.63273	3.6796	1.7148	0	1.79813	0.67958	0.94363	1.6348	1.086	0	0	0	0	2.7574	7.6935	11.191	7.21397	3.839	11.28	2.8751	5.99803
Calcineurin B homologous protein 1 OS=Homo sapiens GN=CHP1 PE=1 SV=3	CHP1_HUMAN	22 kDa	0.34644	1.2044	2.1799	1.24358	2.1171	2.3758	0.88603	1.79298	0.30105	0.91949	3.2432	1.48791	2.8924	2.6595	1.2228	2.25823	0	1.5342	3.5782	1.70413	0	1.5001	0.41835	0.639483
Pyruvate dehydrogenase E1 component subunit alpha, somatic form, mitochondrial OS=Homo sapiens GN=PDHA1 PE=1 SV=3	ODPA_HUMAN	43 kDa	0	2.1728	4.0791	2.08397	5.8901	3.9144	0	3.26817	5.4664	6.0508	7.6463	6.38783	7.1877	5.0582	3.3325	5.1928	18.109	8.5347	1.6434	9.42903	3.9947	0	1.7644	1.9197
Pyruvate dehydrogenase E1 component subunit alpha, testis-specific form, mitochondrial OS=Homo sapiens GN=PDHA2 PE=1 SV=1	ODPAT_HUMAN	43 kDa	0	2.1728	2.224	1.4656	5.8901	3.9144	0	3.26817	5.4664	5.4378	7.6463	6.1835	8.9846	5.0582	3.3325	5.79177	17.12	7.3836	1.6434	8.71567	3.9947	0	1.7644	1.9197
Gamma-glutamyltranspeptidase 1 OS=Homo sapiens GN=GGT1 PE=1 SV=2	GGT1_HUMAN	61 kDa	1.7322	0.63447	0.30134	0.889337	0.73453	0.66098	0	0.46517	1.2042	1.839	1.5822	1.5418	1.5117	0.91303	2.9588	1.79451	0	0	0	0	1.1856	0.74046	0.41835	0.78147
Sideroflexin-3 OS=Homo sapiens GN=SFXN3 PE=1 SV=2	SFXN3_HUMAN	36 kDa	0.40008	0.62255	1.3288	0.78381	1.0176	1.0317	0.98065	1.00998	2	2.5911	2.774	2.45503	3.9036	2.806	1.6235	2.7777	0	0.76745	0.38774	0.385063	0.40497	0.37023	0	0.2584
Methionine--tRNA ligase, cytoplasmic OS=Homo sapiens GN=MARS PE=1 SV=2	SYMC_HUMAN	101 kDa	3.1324	5.2914	6.4265	4.9501	2.2081	1.7148	3.4012	2.44137	1.8926	0.3065	1.9795	1.39287	0	0	0	0	0	1.5342	4.718	2.08407	0	5.6776	3.5287	3.06877
Structural maintenance of chromosomes flexible hinge domain-containing protein 1 OS=Homo sapiens GN=SMCHD1 PE=1 SV=2	SMHD1_HUMAN	226 kDa	1.1661	2.0857	0.62618	1.29266	2.5776	7.8116	2.7221	4.37043	0.33979	4.1158	2.2957	2.25043	2.501	12.703	4.7272	6.64373	0	2.3012	1.4313	1.24417	3.141	0	0.81439	1.31846
Splicing factor 3B subunit 2 OS=Homo sapiens GN=SF3B2 PE=1 SV=2	SF3B2_HUMAN	100 kDa	0	10.169	3.2309	4.46663	4.6002	7.0489	6.3858	6.01163	0.67958	0.34128	0.66098	0.560613	3.4808	1.5775	0.64941	1.90257	0	0	0.48762	0.16254	0	0	0	0
NADH dehydrogenase [ubiquinone] 1 beta subcomplex subunit 1 OS=Homo sapiens GN=NDUFB1 PE=1 SV=1	NDUB1_HUMAN	7 kDa	0.69288	0.63447	0.90402	0.74379	0	0	0.59068	0.196893	1.2042	0.91949	1.0548	1.0595	1.5117	1.8261	1.0759	1.47123	0.49458	1.1512	1.1632	0.936327	1.1856	1.4809	1.255	1.30717
Sulfhydryl oxidase 2 OS=Homo sapiens GN=QSOX2 PE=1 SV=3	QSOX2_HUMAN	78 kDa	0	1.2044	7.1755	2.7933	0	0	10.655	3.55167	1.544	0.91949	0.7911	1.08486	0.60467	0.30434	0.53796	0.482323	0	4.2195	1.551	1.9235	0.59282	3.0384	0.81439	1.48187
ELMO domain-containing protein 2 OS=Homo sapiens GN=ELMOD2 PE=1 SV=1	ELMD2_HUMAN	35 kDa	2.3322	5.2696	3.8332	3.81167	2.9381	3.672	6.9396	4.51657	0.87328	0	1.6348	0.836027	5.3305	2.0508	0.6848	2.6887	4.5957	0	2.1469	2.24753	7.1797	4.5123	1.6288	4.44027
Apolipoprotein E OS=Homo sapiens GN=APOE PE=1 SV=1	APOE_HUMAN	36 kDa	0	0	0.60268	0.200893	0	0	0.29534	0.0984467	0.64084	0.95427	1.3853	0.99347	0	0	0	0	4.1897	1.9176	1.4628	2.52337	1.2149	3.3717	4.194	2.92687
HEAT repeat-containing protein 1 OS=Homo sapiens GN=HEATR1 PE=1 SV=3	HEAT1_HUMAN	242 kDa	0.80017	0.62851	2.055	1.16123	2.0352	0.33049	2.7412	1.7023	5.55	1.226	0.59419	2.45673	1.5806	1.544	0.80694	1.31051	0	0	0	0	0	0	0	0
Inactive tyrosine-protein kinase 7 OS=Homo sapiens GN=PTK7 PE=1 SV=2	PTK7_HUMAN	118 kDa	0.80017	1.2451	4.7883	2.27786	0.73906	0	8.3224	3.02049	0.67958	0	0	0.226527	2.8932	2.1973	1.8925	2.32767	0	0	0	0	0.80995	0.38344	0.42186	0.538417
Serine beta-lactamase-like protein LACTB, mitochondrial OS=Homo sapiens GN=LACTB PE=1 SV=2	LACTB_HUMAN	61 kDa	5.411	3.2842	0.98925	3.22815	0.73906	0.74152	1.6873	1.05596	0.67958	0.34128	1.8089	0.943253	1.8619	3.9438	10.414	5.40657	0	0	0	0	0	0.38344	0	0.127813
ELAV-like protein 1 OS=Homo sapiens GN=ELAVL1 PE=1 SV=2	ELAV1_HUMAN	36 kDa	1.4394	1.5683	1.6302	1.54597	2.5811	2.2246	1.4653	2.09033	0.6021	1.2956	1.4521	1.1166	0.67355	1.2397	0.91839	0.94388	0	0	0.77548	0.258493	0	0	0	0
60S ribosome subunit biogenesis protein NIP7 homolog OS=Homo sapiens GN=NIP7 PE=1 SV=1	NIP7_HUMAN	20 kDa	4.6645	0	4.4832	3.04923	4.0512	1.483	1.8147	2.44963	1.0194	1.3651	1.322	1.2355	2.0207	1.262	1.3342	1.53897	0	0	0	0	0	0	0	0
Pumilio homolog 3 OS=Homo sapiens GN=PUM3 PE=1 SV=3	PUM3_HUMAN	74 kDa	2.0553	2.6616	5.2146	3.3105	13.243	1.7148	3.502	6.15327	0	1.2849	1.6348	0.973233	5.338	0.9991	2.019	2.78537	0	0	1.4313	0.4771	0	0	0	0
Ribosome biogenesis regulatory protein homolog OS=Homo sapiens GN=RRS1 PE=1 SV=2	RRS1_HUMAN	41 kDa	0.74652	1.5217	0.60268	0.956967	1.9897	2.5099	0.59068	1.69676	1.1743	0.613	0.7911	0.859467	2.1163	1.2174	1.3449	1.55953	0	0	2.4263	0.808767	0	0	0	0
Transmembrane protein 205 OS=Homo sapiens GN=TMEM205 PE=1 SV=1	TM205_HUMAN	21 kDa	0.69288	0.93978	0.72614	0.786267	0.73906	1.4428	1.1699	1.11725	1.2817	1.6368	1.1884	1.36897	0.67355	1.2397	1.1874	1.03355	1.1057	0	0	0.368567	0.80995	1.904	0.84372	1.18589
Mannosyl-oligosaccharide 1,2-alpha-mannosidase IA OS=Homo sapiens GN=MAN1A1 PE=1 SV=3	MA1A1_HUMAN	73 kDa	0	1.7744	3.3308	1.70173	3.6772	1.1123	3.4012	2.73023	0.67958	1.3303	1.322	1.11063	0.33678	0.631	0.97411	0.647297	0.55285	0	0.97523	0.50936	0.40497	3.0325	2.4655	1.96766
F-actin-capping protein subunit alpha-1 OS=Homo sapiens GN=CAPZA1 PE=1 SV=3	CAZA1_HUMAN	33 kDa	1.859	2.1383	2.9442	2.31383	1.1086	1.072	0.38997	0.856857	0	0.613	2.1622	0.925067	2.501	1.6301	0.86266	1.66459	0	1.0226	2.2383	1.08697	1.9973	0	0	0.665767
F-actin-capping protein subunit alpha-2 OS=Homo sapiens GN=CAPZA2 PE=1 SV=3	CAZA2_HUMAN	33 kDa	0.69288	1.2044	2.5812	1.49283	0	0.33049	0	0.110163	0	0.613	2.1622	0.925067	1.8275	0.6836	0.53796	1.01635	0	0	0.77548	0.258493	1.9973	0	0	0.665767
Cathepsin D OS=Homo sapiens GN=CTSD PE=1 SV=1	CATD_HUMAN	45 kDa	2.4251	1.2044	4.6141	2.74787	0.64806	0.66098	2.6794	1.32948	0.90315	0	1.0548	0.65265	0.30233	0	0.26898	0.190437	0.98916	0.38373	0.77548	0.716123	0.59282	1.1298	0.41835	0.713657
Annexin A5 OS=Homo sapiens GN=ANXA5 PE=1 SV=2	ANXA5_HUMAN	36 kDa	1.7322	1.5862	2.1094	1.80927	0.64806	0	0	0.21602	0	0.91949	1.3185	0.745997	0	0	0	0	0	1.5349	3.5895	1.70813	0	2.618	0.84021	1.15274
Plectin OS=Homo sapiens GN=PLEC PE=1 SV=3	PLEC_HUMAN	532 kDa	1.493	2.4841	3.9622	2.64643	8.6973	7.4705	2.1101	6.09263	0.33979	0.68255	0.33049	0.450943	3.3221	2.3697	0	1.89727	0	2.0455	1.4313	1.15893	1.4146	4.535	0	1.9832
Peroxisomal acyl-coenzyme A oxidase 1 OS=Homo sapiens GN=ACOX1 PE=1 SV=3	ACOX1_HUMAN	74 kDa	1.6003	2.0857	1.2524	1.64613	0	0	0.90736	0.302453	3.4455	1.6716	0.66098	1.92603	1.8619	0.6836	0.97411	1.1732	0.55285	2.5568	2.4065	1.83872	0.40497	0.76689	2.5312	1.23435
NADH dehydrogenase [ubiquinone] 1 beta subcomplex subunit 4 OS=Homo sapiens GN=NDUFB4 PE=1 SV=3	NDUB4_HUMAN	15 kDa	1.0393	0.31127	0	0.45019	0.36953	0.66098	1.0753	0.701937	0.98063	0.64778	0.5274	0.718603	0.67355	1.2397	1.1874	1.03355	0.49458	1.5349	0.38774	0.80574	2.9934	2.2478	1.6804	2.3072
Transmembrane 9 superfamily member 3 OS=Homo sapiens GN=TM9SF3 PE=1 SV=2	TM9S3_HUMAN	68 kDa	1.493	1.5564	1.0892	1.37953	1.3871	0.33049	2.1506	1.2894	0.33979	0	0.2637	0.201163	1.2782	0	0.26898	0.515727	2.0949	0.38373	1.8506	1.44308	0.80995	1.8776	1.255	1.31418
Torsin-1A-interacting protein 1 OS=Homo sapiens GN=TOR1AIP1 PE=1 SV=2	TOIP1_HUMAN	66 kDa	0	0.8872	1.9785	0.955233	2.1262	0.74152	0.38997	1.0859	0.94189	2.3194	1.1216	1.46096	1.2782	1.544	2.1615	1.66123	1.1057	0	0.77548	0.62706	0.40497	1.5192	1.2327	1.05229
WD repeat-containing protein 75 OS=Homo sapiens GN=WDR75 PE=1 SV=1	WDR75_HUMAN	95 kDa	0.40008	5.9387	6.2902	4.20966	1.4781	1.8538	7.7195	3.6838	1.3592	0.68255	1.6525	1.23142	0.67355	0.631	1.2988	0.867783	0	0	0.97523	0.325077	0	0	0	0
Myristoylated alanine-rich C-kinase substrate OS=Homo sapiens GN=MARCKS PE=1 SV=4	MARCS_HUMAN	32 kDa	0.69288	0.9517	0.60268	0.749087	0.97209	0.66098	0.59068	0.74125	0.90315	0.91949	0.5274	0.783347	0.60467	0.60869	0.53796	0.583773	3.9566	0.38373	0.77548	1.70527	0	1.4809	2.0953	1.19207
DNA-directed RNA polymerase II subunit RPB2 OS=Homo sapiens GN=POLR2B PE=1 SV=1	RPB2_HUMAN	134 kDa	0	0.8872	0	0.295733	5.1417	2.5723	1.8147	3.17623	0	0	0	0	2.2877	2.7344	2.0544	2.35883	0.91913	1.5342	2.1469	1.53341	10.097	2.2788	4.8863	5.75403
U3 small nucleolar RNA-associated protein 15 homolog OS=Homo sapiens GN=UTP15 PE=1 SV=3	UTP15_HUMAN	58 kDa	4.1106	4.9682	5.3145	4.79777	10.302	2.4564	4.3086	5.689	0.33979	0.34128	1.4784	0.719823	1.4361	1.3146	2.3156	1.68877	0	0	1.2032	0.401067	0	0	0	0
Glucose-6-phosphate isomerase OS=Homo sapiens GN=GPI PE=1 SV=4	G6PI_HUMAN	63 kDa	3.0788	1.2451	3.0824	2.46877	0.73906	0.74152	0.77994	0.753507	15.105	0.98905	0.92468	5.67291	0	0	0	0	0	0.5113	2.7259	1.07907	0	3.0279	0	1.0093
Heterogeneous nuclear ribonucleoprotein A/B OS=Homo sapiens GN=HNRNPAB PE=1 SV=2	ROAA_HUMAN	36 kDa	3.4644	2.8551	3.0134	3.11097	3.3313	3.9659	4.714	4.00373	0	2.1455	1.3185	1.15467	2.1163	1.5217	1.0759	1.5713	0	0	1.9387	0.646233	0	0	0	0
Peroxiredoxin-6 OS=Homo sapiens GN=PRDX6 PE=1 SV=3	PRDX6_HUMAN	25 kDa	2.2396	2.5081	2.7194	2.48903	0	0	0.38997	0.12999	0.94189	0.91949	0.2637	0.70836	0	0	0	0	0.55285	3.0678	1.4628	1.69448	0	1.8908	0.84372	0.911507
Probable ATP-dependent RNA helicase DDX47 OS=Homo sapiens GN=DDX47 PE=1 SV=1	DDX47_HUMAN	51 kDa	1.493	1.7744	0.62618	1.29786	1.4691	2.4161	2.89	2.2584	0.87328	0.68255	1.5857	1.04718	2.8722	2.9335	0.59368	2.13313	0	0	0.48762	0.16254	1.0097	0	0	0.336567
Protein sel-1 homolog 1 OS=Homo sapiens GN=SEL1L PE=1 SV=3	SE1L1_HUMAN	89 kDa	1.9663	1.7744	2.5047	2.0818	1.7931	1.7148	2.1101	1.87267	0.67958	0.98905	3.9339	1.86751	0.94145	0.3155	5.5545	2.27048	0.55285	0	0	0.184283	1.2149	3.0457	0.84372	1.70144
Synaptophysin-like protein 1 OS=Homo sapiens GN=SYPL1 PE=1 SV=1	SYPL1_HUMAN	29 kDa	2.5324	2.1849	1.3288	2.01537	0.64806	1.322	0.59068	0.85358	2.3398	0.68255	0.66098	1.22778	0.60467	0.93534	0.91839	0.819467	0	0	0	0	0	0.74046	0	0.24682
WD repeat-containing protein 3 OS=Homo sapiens GN=WDR3 PE=1 SV=1	WDR3_HUMAN	106 kDa	3.8984	4.7533	2.8678	3.83983	2.9381	3.4297	1.9826	2.78347	0.30105	1.2501	1.6348	1.06198	2.8924	2.0508	2.3234	2.4222	0	0	2.1469	0.715633	0	0	0	0
Importin-5 OS=Homo sapiens GN=IPO5 PE=1 SV=4	IPO5_HUMAN	124 kDa	2.2932	4.6629	5.1125	4.02287	0.32403	0.33049	0.29534	0.31662	0.6021	0	1.1216	0.574567	0.63911	0.30434	0.86266	0.602037	0.55285	1.0226	0.87535	0.816933	0	5.7074	1.2656	2.32433
Cation-dependent mannose-6-phosphate receptor OS=Homo sapiens GN=M6PR PE=1 SV=1	MPRD_HUMAN	31 kDa	0.80017	0.62255	0.72614	0.716287	1.4781	1.1123	1.1699	1.25343	0.67958	1.0238	1.6525	1.11863	0.67355	1.262	0.97411	0.969887	0	0	0	0	1.6199	1.5338	1.6874	1.6137
Pre-mRNA-processing factor 6 OS=Homo sapiens GN=PRPF6 PE=1 SV=1	PRP6_HUMAN	107 kDa	0	2.6616	4.9617	2.5411	3.6726	3.4297	7.4744	4.8589	0	0.94363	2.7158	1.21981	5.338	2.7344	0.6848	2.91907	0	1.5342	0.71563	0.749943	0	0.7596	0.81439	0.524663
Erythrocyte band 7 integral membrane protein OS=Homo sapiens GN=STOM PE=1 SV=3	STOM_HUMAN	32 kDa	0.69288	0.63447	0.30134	0.542897	0	0.33049	0.59068	0.307057	0	0	0	0	0	0	0.26898	0.08966	4.4512	4.6047	1.9387	3.66487	2.9641	3.3321	5.0202	3.77213
Elongation factor 1-beta OS=Homo sapiens GN=EEF1B2 PE=1 SV=3	EF1B_HUMAN	25 kDa	1.493	0.62255	0.60268	0.906077	0	0	0	0	0.67958	0.613	0.5274	0.60666	0	0	0.26898	0.08966	1.6585	1.0226	0.77548	1.15219	3.1812	2.2346	4.6194	3.34507
Protein FAM210B OS=Homo sapiens GN=FAM210B PE=1 SV=2	F210B_HUMAN	20 kDa	1.5662	0.31127	0	0.625823	1.8386	4.4261	1.5599	2.6082	4.8523	1.2849	0.66098	2.26606	1.4361	3.3654	1.6589	2.15347	0	0.5113	0	0.170433	0.40497	0	0.42186	0.27561
Cytochrome c-type heme lyase OS=Homo sapiens GN=HCCS PE=1 SV=1	CCHL_HUMAN	31 kDa	0.80017	0.62255	0.72614	0.716287	0.73906	0.74152	1.3706	0.950393	0.64084	0.68255	1.322	0.881797	1.3471	1.262	1.6235	1.41087	0	1.0226	1.363	0.7952	1.2149	1.1503	0	0.7884
Dihydrolipoyl dehydrogenase, mitochondrial OS=Homo sapiens GN=DLD PE=1 SV=2	DLDH_HUMAN	54 kDa	1.2003	1.1985	5.2146	2.5378	7.3591	2.8146	5.3643	5.17933	0	0	1.6348	0.544933	0.76257	2.0508	0.3247	1.04602	0	3.0683	2.1469	1.7384	3.029	2.2788	1.6288	2.3122
ER lumen protein-retaining receptor 1 OS=Homo sapiens GN=KDELR1 PE=1 SV=1	ERD21_HUMAN	25 kDa	0.80017	2.1323	2.0785	1.67032	0	0.37076	0.77994	0.383567	0	0.68255	0.99147	0.558007	1.3471	0.631	0.64941	0.875837	1.1057	1.9176	0.48762	1.17031	1.2149	1.1503	0.84372	1.06964
Electron transfer flavoprotein subunit beta OS=Homo sapiens GN=ETFB PE=1 SV=3	ETFB_HUMAN	28 kDa	0.69288	0.31127	0.72614	0.576763	1.1086	0.74152	0.38997	0.746697	1.8838	1.3303	2.1798	1.79797	0.67355	0.94649	0.86266	0.827567	1.1057	1.0226	2.3382	1.48883	0	0	0.41835	0.13945
Transcription activator BRG1 OS=Homo sapiens GN=SMARCA4 PE=1 SV=2	SMCA4_HUMAN	185 kDa	1.1661	1.7744	0.98925	1.30992	1.8386	4.0553	3.2948	3.0629	0.33979	1.3651	0.33049	0.67846	4.0532	0.631	1.2431	1.97577	0	0.5113	50.256	16.9224	12.365	1.4966	34.348	16.0699
Transmembrane protein 120A OS=Homo sapiens GN=TMEM120A PE=1 SV=1	T120A_HUMAN	41 kDa	0.74652	0.63447	0	0.46033	0.64806	0.66098	0.59068	0.63324	1.2817	1.9433	1.4521	1.55903	1.9518	2.175	1.8368	1.98787	0	0	0.38774	0.129247	0	0.37023	0	0.12341
39S ribosomal protein L27, mitochondrial OS=Homo sapiens GN=MRPL27 PE=1 SV=1	RM27_HUMAN	16 kDa	2.3322	8.3113	5.3311	5.32487	5.8866	5.6292	3.3214	4.94573	0.87328	2.8309	1.9653	1.88983	4.0846	0	1.3696	1.81807	0	7.5385	1.6434	3.06063	0	2.6545	3.5287	2.06107
Lanosterol 14-alpha demethylase OS=Homo sapiens GN=CYP51A1 PE=1 SV=3	CP51A_HUMAN	57 kDa	0.40008	0	0	0.13336	1.1086	1.072	1.0753	1.0853	0	0.34128	0	0.11376	1.5806	0.3155	1.4563	1.11747	2.706	0.76745	0	1.15782	1.8077	1.8776	2.5206	2.06863
Activated RNA polymerase II transcriptional coactivator p15 OS=Homo sapiens GN=SUB1 PE=1 SV=3	TCP4_HUMAN	14 kDa	0	0	0	0	0	0	0.38997	0.12999	0	0	0.33049	0.110163	0	0	0.26898	0.08966	1.9783	4.3476	1.6508	2.6589	4.3669	3.7419	2.5101	3.53963
Phospholipid hydroperoxide glutathione peroxidase, mitochondrial OS=Homo sapiens GN=GPX4 PE=1 SV=3	GPX4_HUMAN	22 kDa	0.74652	0.62255	1.0892	0.819423	0	1.483	1.1699	0.8843	1.3592	1.7064	0.66098	1.24219	0	1.262	1.2988	0.8536	0	0	0.48762	0.16254	2.4298	0	1.2586	1.22947
Lysophosphatidylcholine acyltransferase 1 OS=Homo sapiens GN=LPCAT1 PE=1 SV=2	PCAT1_HUMAN	59 kDa	0.40008	0.63447	0.90402	0.64619	1.3871	0.33049	2.7412	1.48626	0.30105	0.613	0.5274	0.480483	1.2782	2.1862	1.1874	1.5506	0.55285	0	0	0.184283	0.80995	1.519	0.42186	0.916937
Monoacylglycerol lipase ABHD12 OS=Homo sapiens GN=ABHD12 PE=1 SV=2	ABD12_HUMAN	45 kDa	0	3.5488	3.1309	2.22657	0.69356	0	4.5368	1.74345	0.30105	1.226	1.0548	0.860617	0.907	1.2397	1.8164	1.32103	0	0	0	0	1.1856	3.053	0	1.41287
Paraspeckle component 1 OS=Homo sapiens GN=PSPC1 PE=1 SV=1	PSPC1_HUMAN	59 kDa	2.0553	3.1186	3.9387	3.03753	1.2961	2.1037	0.59068	1.33016	1.5827	0.95427	1.649	1.39532	1.8829	0.91303	0.53796	1.1113	0	0	4.5499	1.51663	0	0	0	0
Mitochondrial import inner membrane translocase subunit TIM16 OS=Homo sapiens GN=PAM16 PE=1 SV=2	TIM16_HUMAN	14 kDa	0.34644	0.9517	1.2054	0.834513	0.97209	1.322	0.59068	0.96159	0.90315	1.226	1.0548	1.06132	1.2093	0.91303	1.9386	1.35364	0.55285	0	0	0.184283	0	0	0.8367	0.2789
Methyltransferase-like protein 7B OS=Homo sapiens GN=METTL7B PE=1 SV=2	MET7B_HUMAN	28 kDa	0.40008	0	1.0275	0.47586	2.2172	1.8135	1.8552	1.96197	0.30105	0.68255	1.2552	0.746267	1.6839	2.1862	0.97411	1.61474	0	0	0	0	0.80995	0	0	0.269983
Transducin beta-like protein 3 OS=Homo sapiens GN=TBL3 PE=1 SV=2	TBL3_HUMAN	89 kDa	0	7.1961	4.312	3.83603	0.73906	0.33049	11.707	4.25885	3.4754	0.613	1.6085	1.89897	0.60467	1.2923	0.86266	0.919877	0	0	0	0	0	0	0	0
DnaJ homolog subfamily A member 3, mitochondrial OS=Homo sapiens GN=DNAJA3 PE=1 SV=2	DNJA3_HUMAN	52 kDa	1.5126	9.1802	7.5789	6.09057	8.8282	4.5295	3.4012	5.5863	0.30105	0	0	0.10035	0.76257	0	0	0.25419	0.49458	3.8354	2.1469	2.15896	0	0.7596	0	0.2532
Inter-alpha-trypsin inhibitor heavy chain H2 OS=Homo sapiens GN=ITIH2 PE=1 SV=2	ITIH2_HUMAN	106 kDa	6.9967	4.436	3.1309	4.85453	1.4691	0.85742	2.7221	1.68287	0.87328	1.8873	0.81738	1.19265	0	0	0	0	1.8383	3.8354	2.8625	2.8454	0	0.7596	8.6254	3.12833
Glutaminyl-peptide cyclotransferase-like protein OS=Homo sapiens GN=QPCTL PE=1 SV=2	QPCTL_HUMAN	43 kDa	3.2214	2.6616	3.1309	3.00463	6.6177	5.6292	1.8147	4.6872	0	0	0	0	1.5251	1.3672	3.0358	1.97603	3.6765	1.9179	2.1469	2.58043	0	1.5192	1.6288	1.04933
NADH dehydrogenase [ubiquinone] iron-sulfur protein 4, mitochondrial OS=Homo sapiens GN=NDUFS4 PE=1 SV=1	NDUS4_HUMAN	20 kDa	0.80017	1.2451	0	0.681757	0	0.74152	0	0.247173	0.67958	0.68255	0.33049	0.564207	0.67355	19.355	1.1874	7.07198	3.084	1.9176	2.7259	2.57583	0	0	1.6734	0.5578
NADH dehydrogenase [ubiquinone] iron-sulfur protein 8, mitochondrial OS=Homo sapiens GN=NDUFS8 PE=1 SV=1	NDUS8_HUMAN	24 kDa	0	0	0.60268	0.200893	0	0.33049	1.1814	0.503963	0.90315	0.3065	0	0.403217	0.60467	0.91303	1.0759	0.864533	3.8425	1.9186	1.551	2.43737	0.59282	1.8512	2.0953	1.51311
Heat shock protein 75 kDa, mitochondrial OS=Homo sapiens GN=TRAP1 PE=1 SV=3	TRAP1_HUMAN	80 kDa	0	0	3.8395	1.27983	2.945	0	1.5865	1.5105	1.7466	0.3065	0	0.684367	1.5251	2.3697	1.6662	1.85367	1.8383	5.993	5.1058	4.31237	1.9973	7.5629	4.3431	4.63443
Membrane cofactor protein OS=Homo sapiens GN=CD46 PE=1 SV=3	MCP_HUMAN	44 kDa	3.8448	0.62851	2.3416	2.27164	0.73906	0.74152	1.1699	0.883493	0.67958	0.68255	1.2552	0.872443	0.67355	1.2508	0.91839	0.94758	0	0	1.4628	0.4876	0.80995	1.1371	0	0.649017
Heterogeneous nuclear ribonucleoprotein F OS=Homo sapiens GN=HNRNPF PE=1 SV=3	HNRPF_HUMAN	46 kDa	2.9861	3.7244	6.4912	4.40057	7.0994	8.6689	7.5193	7.76253	2.8644	2.215	4.4053	3.16157	4.116	4.4664	3.4754	4.01927	1.1057	1.9179	3.6978	2.24047	0.80995	1.1371	0.42186	0.789637
Putative hexokinase HKDC1 OS=Homo sapiens GN=HKDC1 PE=1 SV=3	HKDC1_HUMAN	103 kDa	0	0	0	0	2.4457	7.4025	2.7954	4.21453	0	0	0	0	3.1057	1.5663	4.8276	3.16653	0	0	0	0	0	0	0.41835	0.13945
NADH dehydrogenase [ubiquinone] 1 alpha subcomplex subunit 11 OS=Homo sapiens GN=NDUFA11 PE=1 SV=3	NDUAB_HUMAN	15 kDa	0	0.93382	1.0892	0.67434	2.2172	0.37076	1.1699	1.25262	0	0.64778	0	0.215927	1.2782	1.5552	1.8368	1.55673	0	1.0226	0	0.340867	1.2149	0.76689	0.84372	0.941837
Splicing factor 3A subunit 3 OS=Homo sapiens GN=SF3A3 PE=1 SV=1	SF3A3_HUMAN	59 kDa	0.40008	0.62255	0.36307	0.4619	1.1086	1.1123	6.1294	2.78343	0.30105	0.68255	1.5189	0.834167	2.0207	1.5775	1.1874	1.5952	0	0	0.48762	0.16254	0	0	0	0
Zinc finger protein 512 OS=Homo sapiens GN=ZNF512 PE=1 SV=2	ZN512_HUMAN	65 kDa	0.80017	2.397	4.1201	2.43909	4.4072	2.943	4.0194	3.78987	0	0	0.99147	0.33049	2.1987	0.9991	2.7038	1.9672	0	0	0	0	0	0	0	0
OCIA domain-containing protein 1 OS=Homo sapiens GN=OCIAD1 PE=1 SV=1	OCAD1_HUMAN	28 kDa	0.69288	0	0	0.23096	1.2961	0.66098	0.59068	0.849253	0	1.2956	1.7158	1.0038	1.8829	1.2397	0.80694	1.30985	0.91913	0	0	0.306377	2.5884	0	1.2621	1.2835
RNA-binding protein FUS OS=Homo sapiens GN=FUS PE=1 SV=1	FUS_HUMAN	53 kDa	1.1661	1.7744	0.62618	1.18889	2.5276	8.532	4.4941	5.18457	1.7466	3.7745	1.8985	2.4732	2.4321	2.6595	4.1088	3.0668	1.8383	0.5113	1.4313	1.2603	0	0	0	0
Cell division cycle 5-like protein OS=Homo sapiens GN=CDC5L PE=1 SV=2	CDC5L_HUMAN	92 kDa	0.40008	0	1.6154	0.671827	4.7857	1.5989	2.7221	3.03557	0.33979	0	1.9829	0.77423	1.6839	3.6283	1.3342	2.21547	0	0	0	0	0	0	0	0
Ras-related protein Rab-6A OS=Homo sapiens GN=RAB6A PE=1 SV=3	RAB6A_HUMAN	24 kDa	2.5324	3.4776	2.4725	2.8275	0	1.1123	0	0.370767	2.4859	1.0238	1.9795	1.82973	0.33678	0.3155	0.3247	0.32566	1.6585	1.0226	2.3264	1.66917	0.80995	1.5338	1.2656	1.20312
Mitochondrial carrier homolog 1 OS=Homo sapiens GN=MTCH1 PE=1 SV=1	MTCH1_HUMAN	42 kDa	1.5126	4.1833	3.1309	2.94227	0.73453	0.33049	2.7007	1.25524	0.6021	0.91949	0.5274	0.682997	0.60467	0.91303	1.0759	0.864533	0	0	0	0	1.1856	1.5192	1.6288	1.44453
Unconventional myosin-Id OS=Homo sapiens GN=MYO1D PE=1 SV=2	MYO1D_HUMAN	116 kDa	3.0788	5.7217	3.7571	4.18587	2.9472	1.2282	2.89	2.35513	0	0.3065	2.1753	0.827267	0.30233	0.91303	0.59368	0.603013	0	2.3012	0	0.767067	0	0.7596	0.81439	0.524663
RuvB-like 2 OS=Homo sapiens GN=RUVBL2 PE=1 SV=3	RUVB2_HUMAN	51 kDa	1.5662	0.93978	0.72614	1.07737	0.32403	1.7733	0.59068	0.896003	0.67958	1.3651	0.92468	0.989787	0.67355	0.631	2.557	1.28718	1.4137	0	1.363	0.925567	0	0.74046	0.41835	0.38627
Arginine--tRNA ligase, cytoplasmic OS=Homo sapiens GN=RARS PE=1 SV=2	SYRC_HUMAN	75 kDa	0.40008	0.94574	0.36307	0.56963	0.32403	2.144	0.98065	1.14956	0	0.98905	0.99147	0.660173	0.67355	0.94649	0.64941	0.756483	9.4792	3.38	2.8466	5.23527	0	1.5001	1.7644	1.08817
60S ribosomal protein L29 OS=Homo sapiens GN=RPL29 PE=1 SV=2	RL29_HUMAN	18 kDa	1.0393	0.94574	0.30134	0.762127	0.64806	1.4025	0.98065	1.0104	0.94189	0	0	0.313963	0.94145	1.2285	0.53796	0.902637	0.98916	0.38373	1.2631	0.878663	0.80995	1.5073	0.8367	1.05132
Sigma non-opioid intracellular receptor 1 OS=Homo sapiens GN=SIGMAR1 PE=1 SV=1	SGMR1_HUMAN	25 kDa	0	0.62255	0.72614	0.449563	0.73906	0.74152	0.77994	0.753507	0.67958	0.68255	0.66098	0.67437	0.67355	0.631	0.64941	0.65132	1.9783	1.7901	0.48762	1.41867	1.2149	1.8776	1.2621	1.45153
Ribosomal protein S6 kinase alpha-3 OS=Homo sapiens GN=RPS6KA3 PE=1 SV=1	KS6A3_HUMAN	84 kDa	3.5325	1.1985	0.98925	1.90675	0.36953	0.37076	0	0.246763	0	0.68255	0.66098	0.447843	0.67355	0.3155	0.64941	0.546153	3.1305	3.5794	4.0974	3.60243	0	2.271	0	0.757
Ribosomal protein S6 kinase alpha-2 OS=Homo sapiens GN=RPS6KA2 PE=1 SV=2	KS6A2_HUMAN	83 kDa	2.3322	0	0.98925	1.10715	0.36953	0.37076	0	0.246763	0	0.68255	0	0.227517	0	0	0	0	2.2114	4.0907	3.3817	3.22793	0	0	0	0
Ribosomal protein S6 kinase alpha-1 OS=Homo sapiens GN=RPS6KA1 PE=1 SV=2	KS6A1_HUMAN	83 kDa	2.3322	0	1.6154	1.31587	0.36953	0.37076	0	0.246763	0	0.68255	0	0.227517	0	0	0	0	2.2114	1.5342	3.3817	2.37577	0	0	0	0
Scaffold attachment factor B1 OS=Homo sapiens GN=SAFB PE=1 SV=4	SAFB1_HUMAN	103 kDa	1.0393	0.31723	0	0.452177	1.7931	0.33049	1.5713	1.23163	1.2042	1.9085	0.7911	1.30127	2.2197	1.2285	0.80694	1.41838	0	0	0.38774	0.129247	0	0	0	0
Erlin-1 OS=Homo sapiens GN=ERLIN1 PE=1 SV=1	ERLN1_HUMAN	39 kDa	2.4251	2.2206	1.808	2.15123	2.2682	1.6525	2.3627	2.09447	3.088	2.1803	1.8459	2.3714	2.1163	3.3589	3.8772	3.11747	3.9566	0.76745	3.1019	2.60865	3.1812	2.9618	4.1835	3.44217
60S acidic ribosomal protein P1 OS=Homo sapiens GN=RPLP1 PE=1 SV=1	RLA1_HUMAN	12 kDa	1.0393	0.9517	1.2054	1.06547	1.0176	1.322	0.59068	0.97676	0	0.3065	0.5274	0.277967	1.2093	1.2174	0.53796	0.98822	0	0.76745	0.77548	0.51431	1.1856	1.4809	0.41835	1.02828
Cytochrome c oxidase subunit 1 OS=Homo sapiens GN=MT-CO1 PE=1 SV=1	COX1_HUMAN	57 kDa	2.0004	1.8676	2.1784	2.01547	0.36953	0.74152	2.7298	1.28028	0	0	0.66098	0.220327	0.67355	0	0.64941	0.440987	0	0	0	0	0.80995	1.5338	0.84372	1.06249
Mannose-P-dolichol utilization defect 1 protein OS=Homo sapiens GN=MPDU1 PE=1 SV=2	MPU1_HUMAN	27 kDa	0.69288	0.63447	0.90402	0.74379	0.97209	0.66098	0.59068	0.74125	0	1.226	0.5274	0.584467	1.2782	0.60869	0.53796	0.808283	1.4837	0	0	0.494567	2.3713	0.74046	1.6734	1.59505
Metaxin-1 OS=Homo sapiens GN=MTX1 PE=1 SV=2	MTX1_HUMAN	51 kDa	0	2.0916	1.112	1.06787	1.3871	0.33049	6.9366	2.88473	0.90315	1.5566	1.4521	1.30395	0.30233	0.30434	0.53796	0.381543	0	1.4063	0.48762	0.631307	1.9956	0.74046	0.42186	1.05264
Translocation protein SEC62 OS=Homo sapiens GN=SEC62 PE=1 SV=1	SEC62_HUMAN	46 kDa	0	0.62255	0	0.207517	0	0	0	0	0.67958	0.34128	0	0.340287	0	0.3155	0.3247	0.2134	3.7534	1.7901	0.97523	2.17291	3.5862	1.904	3.7862	3.09213
U3 small nucleolar ribonucleoprotein protein MPP10 OS=Homo sapiens GN=MPHOSPH10 PE=1 SV=2	MPP10_HUMAN	79 kDa	0.40008	13.458	19.636	11.1647	2.2172	0.37076	8.6744	3.75412	0	0.34128	0	0.11376	0.33678	0.93534	0.97411	0.748743	0	0	0	0	0	0	0	0
Probable rRNA-processing protein EBP2 OS=Homo sapiens GN=EBNA1BP2 PE=1 SV=2	EBP2_HUMAN	35 kDa	2.3322	3.3427	1.6537	2.44287	2.8607	1.483	2.3726	2.23877	0	0	0.92468	0.308227	0.67355	0.631	1.3696	0.891383	0	0	0.71563	0.238543	0	0	0.81439	0.271463
Ribosome biogenesis protein BOP1 OS=Homo sapiens GN=BOP1 PE=1 SV=2	BOP1_HUMAN	84 kDa	2.4018	6.5735	6.2902	5.0885	7.3073	1.4025	0	2.90327	0.64084	0.613	0.66098	0.638273	1.0103	2.1527	0.86266	1.34189	0	0	0.38774	0.129247	0	0	0	0
Nicastrin OS=Homo sapiens GN=NCSTN PE=1 SV=2	NICA_HUMAN	78 kDa	1.7322	0.63447	1.2054	1.19069	1.6656	1.322	0.59068	1.19276	0.6021	1.5325	1.3185	1.15103	1.2782	0	0.53796	0.605387	0	0	0	0	0	0	0	0
Nucleoporin p54 OS=Homo sapiens GN=NUP54 PE=1 SV=2	NUP54_HUMAN	55 kDa	1.1661	3.5488	2.5047	2.40653	2.9381	1.1879	0.90736	1.67779	0	0.91949	1.6348	0.85143	1.5251	0.3155	1.9076	1.2494	0	0.76708	2.1469	0.971327	2.0194	2.2788	2.4432	2.24713
Mitochondrial import receptor subunit TOM20 homolog OS=Homo sapiens GN=TOMM20 PE=1 SV=1	TOM20_HUMAN	16 kDa	0.69288	1.2689	0.60268	0.85482	0.64806	0.66098	0.59068	0.63324	1.2042	0.3065	0.5274	0.679367	0.60467	0.60869	0.53796	0.583773	1.9783	0.38373	0.77548	1.04584	0	0.74046	1.6734	0.80462
Coiled-coil domain-containing protein 51 OS=Homo sapiens GN=CCDC51 PE=1 SV=2	CCD51_HUMAN	46 kDa	10.833	6.8848	0.36307	6.02696	3.1221	0	0	1.0407	0.33979	0.68255	0	0.34078	0	0	0.3247	0.108233	20.174	13.464	6.3331	13.3237	12.564	8.9794	0	7.18113
60S ribosomal protein L28 OS=Homo sapiens GN=RPL28 PE=1 SV=3	RL28_HUMAN	16 kDa	1.0393	0.63447	0.90402	0.859263	0.64806	0.66098	0.59068	0.63324	1.2042	0.3065	0.2637	0.591467	0.30233	0.91303	0.80694	0.6741	0.49458	0	1.9387	0.811093	0	0.74046	1.6734	0.80462
Cadherin-1 OS=Homo sapiens GN=CDH1 PE=1 SV=3	CADH1_HUMAN	97 kDa	1.1466	0.62255	0.60268	0.79061	0.32403	1.4428	0.38997	0.718933	0.67958	0.68255	0.92468	0.76227	1.2782	1.544	0.64941	1.1572	1.6585	0	0	0.552833	0.80995	0.38344	0.84372	0.679037
Very long-chain specific acyl-CoA dehydrogenase, mitochondrial OS=Homo sapiens GN=ACADVL PE=1 SV=1	ACADV_HUMAN	70 kDa	1.8395	0	0.30134	0.713613	0	1.0317	0.29534	0.442347	1.1743	0.34128	0.5274	0.680993	0.30233	0	0.26898	0.190437	1.4837	0.38373	1.1632	1.01021	2.7881	2.9883	0.84021	2.20554
Junctional adhesion molecule A OS=Homo sapiens GN=F11R PE=1 SV=1	JAM1_HUMAN	33 kDa	1.093	0.31723	0.90402	0.771417	0.32403	0.99147	0.88603	0.733843	0.6021	0.91949	1.0548	0.858797	0.60467	0.60869	0.80694	0.673433	0.98916	0	0.38774	0.458967	0	0.74046	1.255	0.665153
Non-specific lipid-transfer protein OS=Homo sapiens GN=SCP2 PE=1 SV=2	NLTP_HUMAN	59 kDa	1.4394	1.8915	1.9315	1.75413	3.1221	0	0.59068	1.23759	2.1848	2.2498	1.1216	1.85207	0.30233	0	0	0.100777	0	0	0	0	0	0	0	0
Glutaminase kidney isoform, mitochondrial OS=Homo sapiens GN=GLS PE=1 SV=1	GLSK_HUMAN	73 kDa	1.3858	1.5623	1.4523	1.4668	1.1086	1.1123	0.77994	1.00028	0.67958	1.7064	0.99147	1.12582	0.67355	0.631	0.97411	0.759553	0	0	0	0	0	0	0	0
CDGSH iron-sulfur domain-containing protein 1 OS=Homo sapiens GN=CISD1 PE=1 SV=1	CISD1_HUMAN	12 kDa	0	0	0	0	1.1041	1.483	2.3664	1.65117	0.67958	0	0	0.226527	1.0993	1.6301	0.97411	1.2345	0.91913	2.3012	0	1.07344	2.4298	1.5338	2.4725	2.14537
Sterol 26-hydroxylase, mitochondrial OS=Homo sapiens GN=CYP27A1 PE=1 SV=1	CP27A_HUMAN	60 kDa	0.40008	0	0	0.13336	0	0.37076	0.29534	0.222033	1.6602	1.2956	1.1884	1.3814	2.3776	0.93534	1.1874	1.50011	0	0	0	0	0.80995	0.74046	2.1058	1.21874
Microtubule-actin cross-linking factor 1, isoforms 1/2/3/5 OS=Homo sapiens GN=MACF1 PE=1 SV=4	MACF1_HUMAN	838 kDa	1.5662	0.8872	5.564	2.67247	8.0408	9.4611	2.0302	6.5107	0.6021	0.3065	1.1479	0.6855	0	1.987	4.4335	2.14017	0	0	2.4189	0.8063	0	3.0247	0.42186	1.14885
MKI67 FHA domain-interacting nucleolar phosphoprotein OS=Homo sapiens GN=NIFK PE=1 SV=1	MK67I_HUMAN	34 kDa	0.40008	0.62255	0.72614	0.582923	1.1086	1.072	0.29534	0.825313	1.3592	0.68255	0.66098	0.90091	1.9518	0.94649	1.2988	1.39903	0	0	1.4628	0.4876	0	0	0.84372	0.28124
U5 small nuclear ribonucleoprotein 40 kDa protein OS=Homo sapiens GN=SNRNP40 PE=1 SV=1	SNR40_HUMAN	39 kDa	3.4983	1.7744	3.1309	2.8012	2.2081	0.37076	4.4703	2.34972	0	0	0.81738	0.27246	2.1987	5.1007	2.7392	3.3462	0	0.76708	0.71563	0.494237	0	0	0	0
KRR1 small subunit processome component homolog OS=Homo sapiens GN=KRR1 PE=1 SV=4	KRR1_HUMAN	44 kDa	4.5107	0.31723	3.336	2.72131	0.97209	0	6.9366	2.63623	0	0	7.6463	2.54877	11.689	7.4279	6.6649	8.59393	0	0	0	0	0	0	0	0
Mitochondrial import receptor subunit TOM7 homolog OS=Homo sapiens GN=TOMM7 PE=1 SV=1	TOM7_HUMAN	6 kDa	3.5679	0.31723	0.66441	1.51651	2.4446	2.2877	0.29534	1.67588	4.2473	3.3667	23.313	10.309	2.4016	1.6861	0.26898	1.45223	0	0.76745	0.77548	0.51431	0.40497	0	2.1862	0.863723
RNA-binding protein 28 OS=Homo sapiens GN=RBM28 PE=1 SV=3	RBM28_HUMAN	86 kDa	0.34644	0.8872	4.1026	1.77875	4.4186	4.6156	3.7912	4.27513	0.33979	0.34128	1.8985	0.859857	4.7582	2.3059	1.0095	2.6912	0	0	0.38774	0.129247	0	0.7596	0	0.2532
Unconventional myosin-XVIIIa OS=Homo sapiens GN=MYO18A PE=1 SV=3	MY18A_HUMAN	233 kDa	0	2.0857	1.6154	1.2337	1.4691	0	0.90736	0.792153	0	0	0.81738	0.27246	1.5251	1.9982	1.0095	1.51093	1.6585	2.3012	2.1469	2.03553	0.40497	1.5338	3.3162	1.75166
Golgi integral membrane protein 4 OS=Homo sapiens GN=GOLIM4 PE=1 SV=1	GOLI4_HUMAN	82 kDa	0	3.0601	0	1.02003	13.957	8.0222	3.5496	8.5096	0.87328	0	0.81738	0.563553	1.5251	4.0303	0.6848	2.08007	2.7574	9.2276	1.4313	4.4721	0	4.4897	0.81439	1.76803
Protein NipSnap homolog 2 OS=Homo sapiens GN=GBAS PE=1 SV=1	NIPS2_HUMAN	34 kDa	0	1.7744	1.8785	1.21763	2.2036	1.7148	0.90736	1.60859	0	0	0.81738	0.27246	2.2877	2.7344	2.0544	2.35883	1.9083	2.3012	1.4313	1.88027	3.029	2.6299	2.4432	2.7007
Plasma membrane calcium-transporting ATPase 1 OS=Homo sapiens GN=ATP2B1 PE=1 SV=3	AT2B1_HUMAN	139 kDa	0	2.1728	0	0.724267	1.1041	0.33049	4.5368	1.99046	0.87328	0.3065	0	0.39326	0.30233	0	0.26898	0.190437	3.084	1.5342	2.9224	2.51353	0	2.6299	3.3931	2.00767
Phosphoenolpyruvate carboxykinase [GTP], mitochondrial OS=Homo sapiens GN=PCK2 PE=1 SV=3	PCKGM_HUMAN	71 kDa	0	0.31127	0	0.103757	0	0	0	0	0	0.3065	0.5274	0.277967	0	0	0	0	0.55285	12.865	0.77548	4.73111	0	7.1781	5.2931	4.15707
TAR DNA-binding protein 43 OS=Homo sapiens GN=TARDBP PE=1 SV=1	TADBP_HUMAN	45 kDa	1.0393	8.8246	1.3288	3.7309	0.64806	0.99147	3.2373	1.62561	0.6021	0.613	0.7911	0.668733	0.60467	0	0.53796	0.380877	0	0	0.77548	0.258493	0	0	0	0
Complex I intermediate-associated protein 30, mitochondrial OS=Homo sapiens GN=NDUFAF1 PE=1 SV=2	CIA30_HUMAN	38 kDa	0	2.1728	1.112	1.09493	0	0.85742	0	0.285807	3.4931	1.8873	2.4521	2.61083	0.76257	0.6836	2.7392	1.39512	1.8383	5.3695	0	2.4026	2.0194	1.5192	4.8863	2.8083
Inhibitor of nuclear factor kappa-B kinase-interacting protein OS=Homo sapiens GN=IKBIP PE=1 SV=1	IKIP_HUMAN	39 kDa	0	0	0.30134	0.100447	0	0	0	0	0	1.226	0.7911	0.672367	0	0.30434	0.53796	0.280767	1.4837	1.9186	1.1632	1.52183	2.3713	1.4809	2.9284	2.2602
Methyltransferase-like protein 7A OS=Homo sapiens GN=METTL7A PE=1 SV=1	MET7A_HUMAN	28 kDa	0	0	0	0	0	0.33049	0	0.110163	0.30105	0.3065	0.7911	0.466217	0.60467	0.60869	0.80694	0.673433	2.0366	1.5349	0.77548	1.44899	1.7785	2.2214	2.0917	2.03053
40S ribosomal protein SA OS=Homo sapiens GN=RPSA PE=1 SV=4	RSSA_HUMAN	33 kDa	2.0786	1.5742	2.2946	1.98247	0.36953	0	0	0.123177	0	1.602	1.1216	0.907867	0	0	0	0	1.1057	1.6625	2.0386	1.60227	0.40497	0	0	0.13499
Integrin beta-4 OS=Homo sapiens GN=ITGB4 PE=1 SV=5	ITB4_HUMAN	202 kDa	1.1661	0	1.112	0.759367	2.9381	0.85742	0.90736	1.56763	1.8539	0.64778	0.59419	1.03196	3.6894	3.0388	4.1956	3.64127	0	0	0	0	0.40497	0	0	0.13499
Villin-1 OS=Homo sapiens GN=VIL1 PE=1 SV=4	VILI_HUMAN	93 kDa	0	1.5157	2.2181	1.2446	0	0.33049	4.5368	1.62243	1.2429	1.0238	1.2552	1.17397	0.30233	2.0016	0.26898	0.857637	0	0.38373	0.38774	0.257157	0.40497	0.76689	2.1862	1.11935
Glutathione S-transferase kappa 1 OS=Homo sapiens GN=GSTK1 PE=1 SV=3	GSTK1_HUMAN	25 kDa	0	0.62255	15.865	5.49585	0	0.74152	2.1249	0.955473	1.2817	0.68255	0.92468	0.962977	0.67355	0.93534	0.64941	0.752767	0	0	0.97523	0.325077	0	0.76689	0	0.25563
F-actin-capping protein subunit beta OS=Homo sapiens GN=CAPZB PE=1 SV=4	CAPZB_HUMAN	31 kDa	0	0.62255	0.72614	0.449563	2.2172	2.7112	1.5599	2.16277	0	0.34128	0.66098	0.334087	0.67355	1.2508	0.3247	0.749683	0	0.76745	0.38774	0.385063	0	0.76689	0.42186	0.39625
Superkiller viralicidic activity 2-like 2 OS=Homo sapiens GN=SKIV2L2 PE=1 SV=3	SK2L2_HUMAN	118 kDa	1.1661	2.6616	2.8061	2.21127	4.7767	3.8004	5.2159	4.59767	4.2683	0	0	1.42277	3.7238	1.6827	0	1.80217	0	0	0	0	0	0	0	0
Bcl-2-associated transcription factor 1 OS=Homo sapiens GN=BCLAF1 PE=1 SV=2	BCLF1_HUMAN	106 kDa	0	0.31127	0.36307	0.22478	5.8832	3.4297	5.2159	4.84293	3.1057	1.0238	0.66098	1.59683	1.0103	0.631	0.64941	0.76357	0	0	0	0	1.0097	0	0	0.336567
T-complex protein 1 subunit delta OS=Homo sapiens GN=CCT4 PE=1 SV=4	TCPD_HUMAN	58 kDa	1.9468	3.1247	1.4523	2.1746	0	0.37076	0.59068	0.32048	0.64084	1.6716	1.5857	1.29938	0	0	0	0	0	1.9176	2.6261	1.51457	0	3.0411	0.42186	1.15432
Choline transporter-like protein 1 OS=Homo sapiens GN=SLC44A1 PE=1 SV=1	CTL1_HUMAN	73 kDa	0.40008	6.5792	1.3905	2.78993	0.73906	0.74152	0.88603	0.78887	1.0194	0	0.5274	0.5156	0.30233	0.3155	1.4006	0.67281	0	0	0	0	0	2.271	0	0.757
Succinate dehydrogenase cytochrome b560 subunit, mitochondrial OS=Homo sapiens GN=SDHC PE=1 SV=1	C560_HUMAN	19 kDa	0.80017	0.62255	0	0.47424	0.36953	0.74152	0.77994	0.63033	0.33979	0.68255	0.66098	0.561107	0.67355	1.262	0.64941	0.861653	1.6585	1.0226	1.4628	1.3813	0.80995	1.5338	0	0.78125
Probable ATP-dependent RNA helicase DDX52 OS=Homo sapiens GN=DDX52 PE=1 SV=3	DDX52_HUMAN	68 kDa	1.493	1.2451	1.4523	1.3968	0.36953	0.33049	0.38997	0.36333	2.0387	1.2956	0.59419	1.3095	0.67355	0.631	1.1874	0.83065	0	0	0.48762	0.16254	0	0	0	0
Clathrin interactor 1 OS=Homo sapiens GN=CLINT1 PE=1 SV=1	EPN4_HUMAN	68 kDa	0.40008	4.436	0.62618	1.82075	1.4691	1.7148	1.8147	1.6662	2.4261	2.8309	1.6348	2.29727	1.5251	1.3672	0.6848	1.19237	1.8383	2.685	2.1469	2.2234	0	0	0	0
Dihydroorotate dehydrogenase (quinone), mitochondrial OS=Homo sapiens GN=DHODH PE=1 SV=3	PYRD_HUMAN	43 kDa	0	0.8872	0	0.295733	1.4691	2.5723	0	1.34713	0	1.5566	0.81738	0.791327	2.2877	2.3552	0.53796	1.72695	0.91913	3.8354	2.1469	2.30048	2.0194	2.2788	2.4432	2.24713
T-complex protein 1 subunit alpha OS=Homo sapiens GN=TCP1 PE=1 SV=1	TCPA_HUMAN	60 kDa	3.1483	2.8073	0	1.9852	2.945	0	0	0.981667	0.6021	5.5257	3.2564	3.12807	2.8618	2.3697	0.6848	1.9721	0	0	4.0622	1.35407	0	1.8908	0	0.630267
T-complex protein 1 subunit epsilon OS=Homo sapiens GN=CCT5 PE=1 SV=1	TCPE_HUMAN	60 kDa	1.6003	2.1789	1.6154	1.7982	1.4691	0.85742	0	0.775507	2.7659	2.9111	2.2957	2.65757	1.5251	2.0508	0.6848	1.42023	1.8383	1.5342	2.4065	1.92633	2.0194	3.0457	0.81439	1.95983
Methionine aminopeptidase 1 OS=Homo sapiens GN=METAP1 PE=1 SV=2	MAP11_HUMAN	43 kDa	1.1661	1.1985	2.5047	1.6231	1.4691	1.7148	2.7221	1.96867	0.87328	0	1.6348	0.836027	1.5251	1.3672	0.6848	1.19237	0	1.5342	3.5623	1.69883	1.0097	3.0384	2.4432	2.16377
Extended synaptotagmin-2 OS=Homo sapiens GN=ESYT2 PE=1 SV=1	ESYT2_HUMAN	102 kDa	0.40008	1.2451	0.30134	0.64884	1.0631	0.74152	0.77994	0.86152	0.33979	0.98905	1.5189	0.949247	0.67355	1.2508	1.9943	1.30622	0	0	0	0	0	0	0	0
CD63 antigen OS=Homo sapiens GN=CD63 PE=1 SV=2	CD63_HUMAN	26 kDa	1.0393	0.63447	0.60268	0.758817	0.64806	0.66098	0.88603	0.73169	0.6021	0.3065	0.5274	0.478667	0.60467	0.60869	0.53796	0.583773	1.9783	0.76745	0.77548	1.17374	0	0.74046	0	0.24682
Heat shock protein beta-1 OS=Homo sapiens GN=HSPB1 PE=1 SV=2	HSPB1_HUMAN	23 kDa	1.3858	1.257	1.3288	1.32387	0	0	0	0	1.8838	1.6368	1.4521	1.65757	0.67355	0	0.64941	0.440987	1.1057	0	0	0.368567	0.59282	0	0	0.197607
NADH-ubiquinone oxidoreductase chain 1 OS=Homo sapiens GN=MT-ND1 PE=1 SV=1	NU1M_HUMAN	36 kDa	0.80017	0.62255	1.0275	0.81674	0.73906	0	0.38997	0.376343	0.33979	1.0238	0	0.45453	0.67355	1.893	0.64941	1.07199	0	0	0	0	1.6199	1.5338	1.2656	1.4731
Ras-related protein Rab-21 OS=Homo sapiens GN=RAB21 PE=1 SV=3	RAB21_HUMAN	24 kDa	0.80017	0.62255	1.0892	0.837307	0.73906	0.74152	1.3706	0.950393	0.67958	0.68255	0.92468	0.76227	0.67355	0.631	0.64941	0.65132	0	0	0.97523	0.325077	1.2149	0.76689	0	0.660597
mRNA export factor OS=Homo sapiens GN=RAE1 PE=1 SV=1	RAE1L_HUMAN	41 kDa	0	0.62255	0.72614	0.449563	0.73906	1.1123	0.77994	0.8771	0.67958	1.0238	0.92468	0.87602	0.67355	1.5775	0.64941	0.96682	0.98916	0	1.4628	0.81732	0.80995	0	0	0.269983
Tapasin OS=Homo sapiens GN=TAPBP PE=1 SV=1	TPSN_HUMAN	48 kDa	0.40008	0.8872	0.36307	0.550117	0.73453	5.6292	2.1249	2.82954	4.4798	2.7189	1.9116	3.03677	8.4986	2.0508	3.3325	4.6273	0.91913	1.5342	1.4313	1.29488	0	5.9863	0	1.99543
MICOS complex subunit MIC27 OS=Homo sapiens GN=APOOL PE=1 SV=1	MIC27_HUMAN	29 kDa	0	2.6616	2.8678	1.84313	1.8386	2.943	3.112	2.6312	1.5529	1.8873	2.4521	1.9641	1.8275	0.9991	0.3247	1.05043	1.8383	0	0	0.612767	0	0	0	0
Sterol-4-alpha-carboxylate 3-dehydrogenase, decarboxylating OS=Homo sapiens GN=NSDHL PE=1 SV=2	NSDHL_HUMAN	42 kDa	0.34644	0	0.60268	0.316373	0	1.6525	0.59068	0.747727	0.30105	1.226	0.7911	0.772717	0.30233	0.60869	0.80694	0.572653	0	0	0.38774	0.129247	0.99779	1.4941	1.6804	1.39076
DnaJ homolog subfamily C member 5 OS=Homo sapiens GN=DNAJC5 PE=1 SV=1	DNJC5_HUMAN	22 kDa	0.80017	0.62255	0.36307	0.595263	0	0	0	0	0.67958	1.9675	0.81738	1.15482	0.76257	0	0.64941	0.47066	2.3911	1.5342	1.4313	1.78553	3.029	3.0457	2.5018	2.85883
NADH dehydrogenase [ubiquinone] 1 alpha subcomplex subunit 2 OS=Homo sapiens GN=NDUFA2 PE=1 SV=3	NDUA2_HUMAN	11 kDa	0	0	0	0	0.36953	0	0	0.123177	1.2817	0.68255	0.33049	0.764913	1.2782	0.93534	0.91839	1.04398	0.98916	1.0226	1.2631	1.09162	1.4028	1.5073	1.255	1.38837
Wolframin OS=Homo sapiens GN=WFS1 PE=1 SV=2	WFS1_HUMAN	100 kDa	1.1661	0.8872	1.2524	1.1019	0	0	0.90736	0.302453	0	0.68255	2.4927	1.05842	0.76257	1.9982	0.6848	1.14852	3.6765	3.0683	2.1469	2.9639	0	0	3.6982	1.23273
Chitobiosyldiphosphodolichol beta-mannosyltransferase OS=Homo sapiens GN=ALG1 PE=1 SV=2	ALG1_HUMAN	53 kDa	0	0.31127	0.36307	0.22478	0	0	0.77994	0.25998	0.67958	0.68255	0	0.454043	0.67355	0.631	0.64941	0.65132	0.55285	1.0226	0.48762	0.68769	2.4298	3.0543	0.84372	2.10927
Isocitrate dehydrogenase [NADP] cytoplasmic OS=Homo sapiens GN=IDH1 PE=1 SV=2	IDHC_HUMAN	47 kDa	1.6003	1.8736	1.6302	1.70137	0	0	0.38997	0.12999	1.2429	0	0.85789	0.700263	0	0	0	0	1.4837	1.7901	1.8506	1.70813	0	0	0	0
Reactive oxygen species modulator 1 OS=Homo sapiens GN=ROMO1 PE=1 SV=1	ROMO1_HUMAN	8 kDa	0	0	0.60268	0.200893	0.64806	0.66098	0.88603	0.73169	0	0.3065	0.5274	0.277967	1.2093	22.559	0.26898	8.01243	0.49458	1.1512	0.77548	0.807087	1.7785	1.1107	0	0.963067
Zinc transporter 7 OS=Homo sapiens GN=SLC30A7 PE=2 SV=1	ZNT7_HUMAN	42 kDa	2.7482	3.0601	0	1.9361	1.4691	1.7148	2.1101	1.76467	0	0	0.7911	0.2637	1.6696	1.2923	0	0.9873	2.3328	1.1508	1.819	1.76753	0.59282	0	0.8367	0.476507
UBX domain-containing protein 4 OS=Homo sapiens GN=UBXN4 PE=1 SV=2	UBXN4_HUMAN	57 kDa	0.69288	0.63447	0.60268	0.643343	0.64806	0.66098	0.59068	0.63324	0.6021	0.613	0.5274	0.580833	0.94145	0.60869	0.80694	0.785693	0.98916	0.38373	0.77548	0.716123	0	0.37023	0.8367	0.40231
Fascin OS=Homo sapiens GN=FSCN1 PE=1 SV=3	FSCN1_HUMAN	55 kDa	4.8559	2.8074	1.8153	3.15953	0.36953	0.74152	1.5599	0.890317	0.33979	0.68255	0.33049	0.450943	0	0	0	0	0	0	0	0	0	0	0	0
Retrotransposon-derived protein PEG10 OS=Homo sapiens GN=PEG10 PE=1 SV=2	PEG10_HUMAN	80 kDa	0	0	2.8502	0.950067	4.4141	0	6.3459	3.58667	0	0	0	0	0	1.3672	2.351	1.2394	0.55285	2.0455	1.4313	1.34322	0	8.7237	2.5788	3.7675
V-type proton ATPase 116 kDa subunit a isoform 1 OS=Homo sapiens GN=ATP6V0A1 PE=1 SV=3	VPP1_HUMAN	96 kDa	0.40008	0.62255	0	0.340877	0	0.37076	0	0.123587	0.33979	1.9781	2.5594	1.62576	3.2636	0.9991	2.557	2.27323	0	0	0.97523	0.325077	0	1.1355	0	0.3785
B-cell receptor-associated protein 29 OS=Homo sapiens GN=BCAP29 PE=1 SV=2	BAP29_HUMAN	28 kDa	1.1661	0.8872	0	0.684433	2.9381	3.4297	2.7221	3.02997	2.6198	2.8309	3.2695	2.90673	3.0503	2.0508	2.0544	2.38517	0	0	0	0	0	0	0	0
Endoplasmic reticulum resident protein 44 OS=Homo sapiens GN=ERP44 PE=1 SV=1	ERP44_HUMAN	47 kDa	0	1.7744	3.9798	1.91807	2.945	0	1.8147	1.58657	0	0	0	0	0	0	0	0	0.91913	4.3467	5.4337	3.56651	0	2.2861	5.0219	2.436
T-complex protein 1 subunit theta OS=Homo sapiens GN=CCT8 PE=1 SV=4	TCPQ_HUMAN	60 kDa	2.3322	2.6616	1.8785	2.29077	2.2036	2.5723	2.7221	2.49933	0.87328	2.8309	3.0463	2.25016	0	1.3672	1.3696	0.912267	0.91913	0	1.4313	0.783477	0	0	0	0
Vitamin K epoxide reductase complex subunit 1-like protein 1 OS=Homo sapiens GN=VKORC1L1 PE=1 SV=2	VKORL_HUMAN	20 kDa	1.3858	0.9517	0.60268	0.98006	0.64806	0.66098	0.88603	0.73169	0.30105	0.613	0.5274	0.480483	0.907	1.2174	0.53796	0.887453	0	0	0.38774	0.129247	0.59282	0	0.41835	0.337057
Ubiquinone biosynthesis monooxygenase COQ6, mitochondrial OS=Homo sapiens GN=COQ6 PE=1 SV=2	COQ6_HUMAN	51 kDa	0	9.7983	0	3.2661	0	0	1.7349	0.5783	40.998	30.293	19.094	30.1283	48.396	72.144	11.128	43.8893	32.775	1.8459	67.008	33.8763	12.365	5.1248	30.526	16.0053
Flap endonuclease 1 OS=Homo sapiens GN=FEN1 PE=1 SV=1	FEN1_HUMAN	43 kDa	0	0	0	0	0	0	0	0	0.67958	0	0	0.226527	0	0	0	0	1.6585	2.3012	1.2032	1.72097	4.2439	4.5649	6.9663	5.25837
AP-2 complex subunit alpha-1 OS=Homo sapiens GN=AP2A1 PE=1 SV=3	AP2A1_HUMAN	108 kDa	0.80017	0.62255	0.72614	0.716287	1.0631	0	0.38997	0.484357	0.67958	0	0	0.226527	0.33678	0.94649	1.5121	0.93179	0	0	0	0	0.80995	2.2874	0.84372	1.31369
AP-2 complex subunit alpha-2 OS=Homo sapiens GN=AP2A2 PE=1 SV=2	AP2A2_HUMAN	104 kDa	1.2003	0.62255	0.72614	0.849663	0.73906	0	0.38997	0.376343	0.33979	0	0	0.113263	0.33678	0.631	0.91839	0.628723	0	0	0	0	0.80995	1.5338	0.84372	1.06249
Elongation factor 1-delta OS=Homo sapiens GN=EEF1D PE=1 SV=5	EF1D_HUMAN	31 kDa	0.69288	0.31723	0.36307	0.457727	0	0	0	0	0.30105	0.3065	0.5274	0.378317	0	0	0	0	0	0	1.4628	0.4876	1.9956	2.261	4.6264	2.961
Mitochondrial import receptor subunit TOM6 homolog OS=Homo sapiens GN=TOMM6 PE=1 SV=1	TOM6_HUMAN	8 kDa	0.34644	0	0	0.11548	0.32403	0	0.59068	0.304903	1.2042	0.91949	1.3185	1.1474	1.2093	0.91303	0.53796	0.886763	0.98916	0	0	0.32972	0.59282	0.74046	0.8367	0.723327
Magnesium transporter protein 1 OS=Homo sapiens GN=MAGT1 PE=1 SV=1	MAGT1_HUMAN	38 kDa	0	0	0.30134	0.100447	0.36953	0.33049	1.3706	0.690207	0	0.613	0.5274	0.380133	0.97589	0.30434	0.53796	0.606063	1.6585	1.1512	0.38774	1.06581	2.4006	0	0.84372	1.08144
Nuclear pore complex protein Nup133 OS=Homo sapiens GN=NUP133 PE=1 SV=2	NU133_HUMAN	129 kDa	0.80017	0.31127	1.8153	0.97558	0.73906	0	0.90736	0.548807	0	0.34128	0.59419	0.311823	0.67355	0.631	1.5121	0.938883	0.91913	0	0.38774	0.435623	1.2149	1.88	0.84372	1.31287
ER membrane protein complex subunit 7 OS=Homo sapiens GN=EMC7 PE=1 SV=1	EMC7_HUMAN	26 kDa	0.40008	0.31127	1.4523	0.721217	0.36953	0	0.38997	0.253167	0.98063	0.34128	0	0.440637	1.2782	1.2397	0.26898	0.92896	0	0	2.8258	0.941933	1.2149	0.76689	0	0.660597
LIM domain and actin-binding protein 1 OS=Homo sapiens GN=LIMA1 PE=1 SV=1	LIMA1_HUMAN	85 kDa	0.40008	5.3162	2.5808	2.76569	8.0828	5.9808	0.77994	4.94785	0.33979	0	0.66098	0.33359	1.0993	0.631	0.3247	0.685	0	0	0	0	0.80995	0	0	0.269983
WD repeat and FYVE domain-containing protein 1 OS=Homo sapiens GN=WDFY1 PE=1 SV=1	WDFY1_HUMAN	46 kDa	4.1106	0	4.1026	2.73773	1.4691	4.7718	7.7783	4.67307	0	0.94363	0.81738	0.587003	1.5251	0	1.6662	1.06377	0	1.5342	2.8625	1.46557	1.0097	1.5192	0	0.842967
Annexin A4 OS=Homo sapiens GN=ANXA4 PE=1 SV=4	ANXA4_HUMAN	36 kDa	0.34644	0.31723	0	0.221223	0	0	0	0	0.30105	0.613	0.5274	0.480483	0	0	0	0	0	0	0.77548	0.258493	0	26.932	0	8.97733
DNA ligase 3 OS=Homo sapiens GN=LIG3 PE=1 SV=2	DNLI3_HUMAN	113 kDa	0	1.7744	0	0.591467	2.2036	2.5723	2.4054	2.39377	0.33979	0	1.0811	0.47363	2.7143	2.2388	0.80694	1.92001	0	0	0	0	0	0	0	0
Scavenger receptor class B member 1 OS=Homo sapiens GN=SCARB1 PE=1 SV=1	SCRB1_HUMAN	61 kDa	0.69288	0	1.3288	0.673893	1.2961	0.66098	0.59068	0.849253	0.6021	0.613	0.2637	0.492933	0.60467	0.60869	0.53796	0.583773	1.1057	0	0	0.368567	0	0.76689	0.8367	0.53453
Serine palmitoyltransferase 1 OS=Homo sapiens GN=SPTLC1 PE=1 SV=1	SPTC1_HUMAN	53 kDa	0	0.31127	0.72614	0.345803	0.36953	3.5245	0	1.29801	1.0194	0.98905	0.59419	0.867547	0.67355	0.94649	0.64941	0.756483	1.6585	0.76745	0.97523	1.13373	0.40497	0	0.84372	0.41623
Transketolase OS=Homo sapiens GN=TKT PE=1 SV=3	TKT_HUMAN	68 kDa	0	0.62255	1.8382	0.82025	0	0.74152	0.38997	0.377163	1.0194	0.68255	0	0.567317	0.33678	0	0	0.11226	0	1.0226	3.5938	1.5388	0	55.521	12.557	22.6927
Low-density lipoprotein receptor OS=Homo sapiens GN=LDLR PE=1 SV=1	LDLR_HUMAN	95 kDa	1.1661	1.7744	1.8785	1.60633	1.4691	0.85742	0.90736	1.07796	1.7466	2.8309	1.6348	2.07077	0.76257	0	0	0.25419	3.252	1.5342	2.1469	2.31103	2.0194	0	1.6288	1.21607
Actin-related protein 2/3 complex subunit 2 OS=Homo sapiens GN=ARPC2 PE=1 SV=1	ARPC2_HUMAN	34 kDa	1.1661	4.8345	4.1026	3.36773	1.4725	2.8146	0.90736	1.73149	1.7466	0.94363	0	0.896743	0	0	0	0	1.8383	3.4575	2.1469	2.4809	1.0097	4.8958	0	1.9685
Acyl-CoA desaturase OS=Homo sapiens GN=SCD PE=1 SV=2	ACOD_HUMAN	42 kDa	0	0	0	0	0.64806	0.66098	0.88603	0.73169	0	0.3065	0.5274	0.277967	0.60467	0.60869	0.53796	0.583773	0.49458	0	0.38774	0.294107	2.1834	1.4809	2.0953	1.91987
Laminin subunit beta-1 OS=Homo sapiens GN=LAMB1 PE=1 SV=2	LAMB1_HUMAN	198 kDa	1.1466	2.8073	2.224	2.0593	0	2.9487	2.1772	1.70863	0.6021	0	0	0.2007	0	0.60869	0.53796	0.382217	0.49458	0.38373	0.77548	0.551263	0	0	0	0
Protein DEK OS=Homo sapiens GN=DEK PE=1 SV=1	DEK_HUMAN	43 kDa	0.34644	0	0	0.11548	0	0	0	0	0	0	0	0	0	0	0	0	0.98916	1.1512	0.77548	0.971947	2.7763	2.618	4.5866	3.32697
ATP-dependent 6-phosphofructokinase, liver type OS=Homo sapiens GN=PFKL PE=1 SV=6	PFKAL_HUMAN	85 kDa	0.40008	1.2451	5.5373	2.39416	0	0	0	0	0.67958	1.0238	0.66098	0.78812	0.33678	0.3155	1.9909	0.88106	0	0	0.38774	0.129247	0	5.2957	0	1.76523
PRA1 family protein 3 OS=Homo sapiens GN=ARL6IP5 PE=1 SV=1	PRAF3_HUMAN	22 kDa	1.0393	1.2689	0.90402	1.07074	0.97209	0.99147	0.88603	0.949863	0	0.3065	0.5274	0.277967	0.907	0.30434	0.26898	0.49344	0	0	0	0	1.7785	0	0	0.592833
RRP12-like protein OS=Homo sapiens GN=RRP12 PE=1 SV=2	RRP12_HUMAN	144 kDa	0.80017	0.93382	1.0275	0.920497	1.1086	0.70125	0.38997	0.733273	3.0282	0.68255	1.1884	1.63305	0	0.30434	0	0.101447	0	0	1.1632	0.387733	0	0	0	0
40S ribosomal protein S27-like OS=Homo sapiens GN=RPS27L PE=1 SV=3	RS27L_HUMAN	9 kDa	0.69288	0.63447	1.2054	0.84425	1.2961	0.33049	0.59068	0.73909	1.2817	0.613	0.2637	0.719467	0.30233	0	0.26898	0.190437	0.49458	0.38373	0	0.29277	0	0.74046	0.8367	0.52572
SAFB-like transcription modulator OS=Homo sapiens GN=SLTM PE=1 SV=2	SLTM_HUMAN	117 kDa	4.2777	10.938	2.5871	5.93427	16.906	6.3074	8.6744	10.6293	0	0	0	0	0	8.6984	0	2.89947	0	0	0	0	0	0	0	0
Protein SON OS=Homo sapiens GN=SON PE=1 SV=4	SON_HUMAN	264 kDa	0.80017	1.7744	2.5047	1.69309	0.97209	0	6.3515	2.4412	0	0	0	0	0.60467	3.3431	1.2228	1.72352	0	0	0	0	0	0	0.81439	0.271463
Pre-mRNA-splicing factor SPF27 OS=Homo sapiens GN=BCAS2 PE=1 SV=1	SPF27_HUMAN	26 kDa	1.1661	1.7744	1.2524	1.39763	2.5276	2.5723	5.0087	3.36953	0	0.91949	0.2637	0.394397	0.30233	0.30434	1.9076	0.83809	0	1.8459	0	0.6153	0	2.271	0	0.757
Mitochondrial ornithine transporter 1 OS=Homo sapiens GN=SLC25A15 PE=1 SV=1	ORNT1_HUMAN	33 kDa	0.34644	0.31127	0	0.219237	0.32403	0.37076	0.38997	0.361587	0.98063	0.3065	0.92468	0.73727	0.67355	1.2397	0.64941	0.85422	0.49458	0.38373	0.38774	0.422017	1.7785	0.74046	0.84021	1.11972
Heterogeneous nuclear ribonucleoprotein D-like OS=Homo sapiens GN=HNRNPDL PE=1 SV=3	HNRDL_HUMAN	46 kDa	3.2252	0	0.36307	1.19609	1.9442	2.7245	3.2373	2.63533	0.33979	2.1803	4.9219	2.48066	0.67355	1.544	1.9386	1.38538	0	0	0.97523	0.325077	0	0	0	0
Glycogen phosphorylase, brain form OS=Homo sapiens GN=PYGB PE=1 SV=5	PYGB_HUMAN	97 kDa	1.1661	6.5185	9.0364	5.57367	0	0	3.173	1.05767	0	0	0	0	0	0	0	0	0	3.8354	2.8625	2.23263	0	0.7596	0	0.2532
2',3'-cyclic-nucleotide 3'-phosphodiesterase OS=Homo sapiens GN=CNP PE=1 SV=2	CN37_HUMAN	48 kDa	1.2003	0.31127	0.72614	0.745903	0.73453	0	0.38997	0.374833	0.67958	1.3651	2.0726	1.37243	0.30233	0	1.2988	0.53371	2.7574	0.76708	0	1.17483	0	0	0.42186	0.14062
BRI3-binding protein OS=Homo sapiens GN=BRI3BP PE=1 SV=1	BRI3B_HUMAN	28 kDa	0.34644	0	0.30134	0.215927	0.32403	0.99147	0.59068	0.635393	0.6021	0.613	0.7911	0.668733	0.60467	0.60869	1.0759	0.763087	0	0	0.38774	0.129247	0	0.74046	1.255	0.665153
Dephospho-CoA kinase domain-containing protein OS=Homo sapiens GN=DCAKD PE=1 SV=1	DCAKD_HUMAN	27 kDa	0	2.6616	0	0.8872	0	2.4564	0.38997	0.94879	2.6198	0.94363	0.81738	1.46027	2.2877	2.0508	0.64941	1.66264	1.8383	1.5342	1.4313	1.60127	0.80995	0	0	0.269983
Epidermal growth factor receptor OS=Homo sapiens GN=EGFR PE=1 SV=2	EGFR_HUMAN	134 kDa	0	1.7744	0	0.591467	1.4691	3.4297	0.38997	1.76292	3.1057	0.94363	0	1.34978	3.0503	2.7344	3.0639	2.94953	0	0	0	0	0	0	0	0
Glycine dehydrogenase (decarboxylating), mitochondrial OS=Homo sapiens GN=GLDC PE=1 SV=2	GCSP_HUMAN	113 kDa	0	2.6616	4.3832	2.34827	0	0	0	0	0	0	0	0	0	0	0	0	0	9.972	0	3.324	0	3.798	0.81439	1.53746
Heterogeneous nuclear ribonucleoprotein U-like protein 1 OS=Homo sapiens GN=HNRNPUL1 PE=1 SV=2	HNRL1_HUMAN	96 kDa	0.40008	1.7744	2.2416	1.47203	1.4691	3.4297	0.77994	1.89291	3.4931	0.94363	0	1.47891	3.0503	2.7344	0.6848	2.1565	0	0	0	0	0	0	0	0
Inosine-5'-monophosphate dehydrogenase 2 OS=Homo sapiens GN=IMPDH2 PE=1 SV=2	IMDH2_HUMAN	56 kDa	5.411	0.93978	1.8785	2.74309	0	0	0.38997	0.12999	3.067	2.8763	1.1479	2.36373	0	0	0	0	0.49458	0.5113	0.48762	0.497833	0	0	0	0
Probable hydrolase PNKD OS=Homo sapiens GN=PNKD PE=1 SV=2	PNKD_HUMAN	43 kDa	5.8306	2.9729	1.9785	3.594	2.9426	0.74152	2.0773	1.92047	0	0	0	0	0.67355	0.3155	1.0095	0.666183	0	0	0	0	0	0	0	0
FACT complex subunit SPT16 OS=Homo sapiens GN=SUPT16H PE=1 SV=1	SP16H_HUMAN	120 kDa	1.093	0.63447	0.72614	0.81787	0	0	0.77994	0.25998	0.30105	0.34128	0.66098	0.434437	0	2.2914	0.59368	0.961693	0	0.76745	0.71563	0.49436	1.6199	1.1371	1.6769	1.47797
T-complex protein 1 subunit beta OS=Homo sapiens GN=CCT2 PE=1 SV=4	TCPB_HUMAN	57 kDa	0.80017	5.2795	4.4252	3.50162	0	0	3.5629	1.18763	0.33979	0.98905	1.322	0.883613	0	0	0.26898	0.08966	0	0	0.48762	0.16254	0	1.9024	0	0.634133
THO complex subunit 5 homolog OS=Homo sapiens GN=THOC5 PE=1 SV=2	THOC5_HUMAN	79 kDa	0	12.95	11.501	8.15033	0	0.37076	4.6985	1.68975	0	0	0	0	0	0	0	0	0	1.8459	0	0.6153	0	0	1.7644	0.588133
Transmembrane protein 2 OS=Homo sapiens GN=TMEM2 PE=1 SV=1	TMEM2_HUMAN	154 kDa	0	0.93382	5.5475	2.16044	0	1.1123	2.4202	1.1775	0	0.68255	0	0.227517	7.0616	5.9573	0.64941	4.5561	0	1.9234	0	0.641133	3.141	0	0	1.047
Vesicle-associated membrane protein 3 OS=Homo sapiens GN=VAMP3 PE=1 SV=3	VAMP3_HUMAN	11 kDa	0.69288	1.2689	0	0.653927	0.32403	0.66098	0.59068	0.52523	0.90315	0.3065	0	0.403217	0.907	0.60869	0.53796	0.68455	0.49458	0	0	0.16486	1.7785	0	1.255	1.01117
Nesprin-1 OS=Homo sapiens GN=SYNE1 PE=1 SV=4	SYNE1_HUMAN	1011 kDa	1.7322	0	0	0.5774	0.64806	0.66098	4.3558	1.88828	1.1743	0	0.7911	0.655133	0.30233	0.60869	0.53796	0.482993	1.4137	0	0.97523	0.79631	0	0	0	0
SWI/SNF complex subunit SMARCC1 OS=Homo sapiens GN=SMARCC1 PE=1 SV=3	SMRC1_HUMAN	123 kDa	5.8306	1.7744	0	2.535	4.4162	0	6.3746	3.59693	0	0	0.33049	0.110163	1.3471	0.3155	3.424	1.69553	0.55285	0	0	0.184283	0	0	0	0
Carnitine O-palmitoyltransferase 2, mitochondrial OS=Homo sapiens GN=CPT2 PE=1 SV=2	CPT2_HUMAN	74 kDa	0	0.93382	2.2012	1.04501	0	0.74152	0.38997	0.377163	0.67958	1.3651	0.99147	1.01205	0.67355	0.631	0.3247	0.543083	0	0	0.97523	0.325077	0	0	0.84372	0.28124
Protein mago nashi homolog 2 OS=Homo sapiens GN=MAGOHB PE=1 SV=1	MGN2_HUMAN (+1)	17 kDa	0.40008	0.93978	0	0.44662	0.64806	1.7733	0.29534	0.905567	1.0194	0.613	0.85789	0.830097	0.30233	0.60869	0.91839	0.609803	0	0	0.77548	0.258493	0	0	0	0
Protein RER1 OS=Homo sapiens GN=RER1 PE=1 SV=1	RER1_HUMAN	23 kDa	0.40008	0	0	0.13336	1.4781	2.8271	0	1.43507	0	0.94363	0	0.314543	0	0.93534	1.3696	0.768313	2.0248	1.0226	0	1.0158	0	1.9172	0.84372	0.920307
Signal peptidase complex catalytic subunit SEC11C OS=Homo sapiens GN=SEC11C PE=1 SV=3	SC11C_HUMAN	22 kDa	0.40008	0	0	0.13336	1.1086	1.483	0.38997	0.993857	0.67958	0.34128	0	0.340287	1.0103	0	1.2988	0.7697	0	2.0452	0	0.681733	0.99779	0.38344	0.84372	0.74165
Saccharopine dehydrogenase-like oxidoreductase OS=Homo sapiens GN=SCCPDH PE=1 SV=1	SCPDL_HUMAN	47 kDa	0.80017	0.62255	0	0.47424	0.32403	0.74152	0.59068	0.552077	0.67958	0.68255	0	0.454043	0.60467	0.3155	0.91839	0.612853	0	0	0.48762	0.16254	1.4028	1.1503	0.84372	1.13227
Acyl-CoA dehydrogenase family member 9, mitochondrial OS=Homo sapiens GN=ACAD9 PE=1 SV=1	ACAD9_HUMAN	69 kDa	0.34644	0	0	0.11548	0.64806	0.33049	0	0.326183	0.6021	1.5325	1.8459	1.32683	0.60467	0.60869	0.80694	0.673433	0	0	0	0	0.59282	0	0.8367	0.476507
Titin OS=Homo sapiens GN=TTN PE=1 SV=4	TITIN_HUMAN	3816 kDa	0.80017	0	0.62618	0.47545	1.4725	0	0	0.490833	5.4664	0	1.4521	2.30617	0	3.3721	6.7152	3.36243	0.55285	3.4583	3.2868	2.43265	0	0.38344	1.2327	0.538713
Phosphatidylinositide phosphatase SAC1 OS=Homo sapiens GN=SACM1L PE=1 SV=2	SAC1_HUMAN	67 kDa	0.40008	0.62255	2.1784	1.06701	0.73906	0	1.9499	0.89632	0	0.68255	0.99147	0.558007	0.33678	0	0.64941	0.32873	0	0.5113	0	0.170433	0.80995	0.38344	0.42186	0.538417
Lysosomal-associated transmembrane protein 4A OS=Homo sapiens GN=LAPTM4A PE=1 SV=1	LAP4A_HUMAN	27 kDa	0	1.2689	0.90402	0.724307	0.64806	0.33049	0	0.326183	0.6021	3.6384	0.5274	1.5893	0.60467	0.30434	0.53796	0.482323	0	0.38373	1.1632	0.515643	0.59282	0	0	0.197607
26S proteasome non-ATPase regulatory subunit 11 OS=Homo sapiens GN=PSMD11 PE=1 SV=3	PSD11_HUMAN	47 kDa	0.34644	0	0.96575	0.437397	0	0	0	0	1.0194	2.5911	0.85789	1.48946	0	0	0.3247	0.108233	0	0	1.363	0.454333	0	1.5073	0.42186	0.643053
Cytochrome c oxidase subunit 6B1 OS=Homo sapiens GN=COX6B1 PE=1 SV=2	CX6B1_HUMAN	10 kDa	1.1661	2.397	2.7046	2.08923	1.3871	0.37076	2.9846	1.58082	0	0	0	0	0	0	0	0	0	1.0226	0.48762	0.503407	0.40497	0.76689	0	0.39062
2,4-dienoyl-CoA reductase, mitochondrial OS=Homo sapiens GN=DECR1 PE=1 SV=1	DECR_HUMAN	36 kDa	1.9663	0.31127	0.72614	1.00124	0.73906	0.74152	1.1699	0.883493	0.98063	0.68255	0.59419	0.752457	0.67355	0.631	1.0095	0.77135	0	0	0.48762	0.16254	0	0	0	0
Fibrinogen beta chain OS=Homo sapiens GN=FGB PE=1 SV=2	FIBB_HUMAN	56 kDa	0	0	0	0	0	0	0	0	0	0	0	0	0	0.6836	0	0.227867	3.6765	0	3.5782	2.41823	3.029	4.5576	5.723	4.43653
Galectin-8 OS=Homo sapiens GN=LGALS8 PE=1 SV=4	LEG8_HUMAN	36 kDa	0	0.8872	0	0.295733	2.9381	0.85742	0	1.26517	0	0	1.8985	0.632833	1.0649	0	1.3696	0.8115	10.398	1.5342	2.8625	4.93157	1.0097	1.5192	0	0.842967
Nucleolar protein 14 OS=Homo sapiens GN=NOP14 PE=1 SV=3	NOP14_HUMAN	98 kDa	2.0553	0.8872	1.8785	1.607	4.4141	6.4867	0	3.6336	2.6198	0.3065	0.81738	1.24789	2.2877	2.3663	0	1.55133	0	0.5113	0	0.170433	0	0	0	0
Serine/threonine-protein phosphatase 2A catalytic subunit alpha isoform OS=Homo sapiens GN=PPP2CA PE=1 SV=1	PP2AA_HUMAN (+1)	36 kDa	16.719	10.466	7.2983	11.4944	0	0	0	0	0	0	0	0	0	2.6631	0	0.8877	0	0	0	0	0	2.271	3.5287	1.93323
Sec1 family domain-containing protein 1 OS=Homo sapiens GN=SCFD1 PE=1 SV=4	SCFD1_HUMAN	72 kDa	0.74652	0	0	0.24884	0.73906	0.37076	0	0.36994	0.33979	0.613	1.5189	0.823897	0.63911	0.3155	0.80694	0.587183	0	0	0.97523	0.325077	0.40497	1.8512	0	0.752057
Eukaryotic peptide chain release factor GTP-binding subunit ERF3A OS=Homo sapiens GN=GSPT1 PE=1 SV=1	ERF3A_HUMAN	56 kDa	0	1.7744	1.2524	1.00893	0	0	0	0	0	0	0	0	0	0	0	0	1.8383	6.27	3.5782	3.8955	3.6218	3.0384	0.81439	2.49153
39S ribosomal protein L44, mitochondrial OS=Homo sapiens GN=MRPL44 PE=1 SV=1	RM44_HUMAN	38 kDa	0.40008	0.31127	1.4523	0.721217	0	0	0.77994	0.25998	0.30105	0.3065	0.2637	0.290417	0.30233	0	0.53796	0.280097	0	4.5868	0.48762	1.69147	1.9973	3.0379	2.6081	2.54777
Cleft lip and palate transmembrane protein 1-like protein OS=Homo sapiens GN=CLPTM1L PE=1 SV=1	CLP1L_HUMAN	62 kDa	0	2.1912	1.8547	1.34863	0	0	3.8597	1.28657	0	0	0	0	0	0	0	0	0	11.54	0	3.84667	18.846	7.4829	10.304	12.211
Calmegin OS=Homo sapiens GN=CLGN PE=1 SV=1	CLGN_HUMAN	70 kDa	0	0.8872	0	0.295733	0	0	0.77994	0.25998	1.7466	2.1938	1.6348	1.8584	1.5251	1.3672	0	0.9641	3.6765	0.76708	1.4313	1.95829	2.0194	0	2.4432	1.48753
Myeloid-associated differentiation marker OS=Homo sapiens GN=MYADM PE=1 SV=2	MYADM_HUMAN	35 kDa	0.34644	2.4089	2.1564	1.63725	0.64806	1.4025	0.68531	0.911957	0.30105	0	0	0.10035	0	0.3155	0	0.105167	0	0.38373	0.77548	0.386403	0.59282	0.74046	0	0.444427
Nuclear pore complex protein Nup98-Nup96 OS=Homo sapiens GN=NUP98 PE=1 SV=4	NUP98_HUMAN	198 kDa	2.3322	1.7744	0.62618	1.57759	2.9381	4.2871	0	2.4084	0	0	1.6348	0.544933	1.5251	0.6836	2.7392	1.6493	0.91913	0.76708	0.71563	0.800613	0	0	0	0
pre-rRNA processing protein FTSJ3 OS=Homo sapiens GN=FTSJ3 PE=1 SV=2	SPB1_HUMAN	97 kDa	0	0.31127	0	0.103757	1.7066	1.8489	1.7934	1.78297	0.33979	0.613	0.5274	0.493397	1.5117	0	0.53796	0.68322	0	0	0.71563	0.238543	0	0	0	0
Protein FAM186B OS=Homo sapiens GN=FAM186B PE=2 SV=2	F186B_HUMAN	104 kDa	0.34644	0	1.2289	0.525113	0	0.66098	0.29534	0.318773	0	0.3065	0.5274	0.277967	0.60467	0.60869	0	0.404453	1.4837	1.1512	1.8788	1.50457	0.59282	0.37023	0	0.321017
Actin-like protein 6A OS=Homo sapiens GN=ACTL6A PE=1 SV=1	ACL6A_HUMAN	47 kDa	0	0	0.72614	0.242047	1.1086	1.1123	0	0.7403	0	1.0238	0.66098	0.561593	2.0207	1.5775	0.3247	1.30763	0	0	0	0	0	0	0	0
Far upstream element-binding protein 2 OS=Homo sapiens GN=KHSRP PE=1 SV=4	FUBP2_HUMAN	73 kDa	1.1466	0.63447	2.4574	1.41282	0.69356	2.0635	2.942	1.89969	0	0	0	0	0	0	0	0	0	0	0	0	0	0	0	0
Tumor protein D54 OS=Homo sapiens GN=TPD52L2 PE=1 SV=2	TPD54_HUMAN	22 kDa	0	0	0	0	0	0	0	0	0	0	0	0	0	0	0.53796	0.17932	1.1057	0.38373	1.6508	1.04674	0.59282	2.6313	3.3503	2.19147
E3 UFM1-protein ligase 1 OS=Homo sapiens GN=UFL1 PE=1 SV=2	UFL1_HUMAN	90 kDa	0.80017	0.63447	1.3288	0.921147	0.32403	0.37076	2.9961	1.2303	0.67958	0	0.5274	0.402327	0.60467	0	0.91839	0.507687	0	0	0	0	0	0	0	0
Protein 4.1 OS=Homo sapiens GN=EPB41 PE=1 SV=4	41_HUMAN	97 kDa	2.4554	2.1728	6.1862	3.6048	2.2081	1.1879	1.5865	1.66083	0.33979	2.8309	1.6348	1.60183	0.33678	3.0499	2.0544	1.81369	0	0	0	0	1.0097	1.5192	0	0.842967
Cytochrome P450 20A1 OS=Homo sapiens GN=CYP20A1 PE=1 SV=1	CP20A_HUMAN	52 kDa	0	0	0.36307	0.121023	0.36953	0	0.77994	0.383157	0	0.91949	0.85789	0.59246	0.63911	0.30434	0.26898	0.404143	2.7642	1.4063	0	1.39017	1.4028	0	0	0.4676
Ribosomal RNA small subunit methyltransferase NEP1 OS=Homo sapiens GN=EMG1 PE=1 SV=4	NEP1_HUMAN	27 kDa	1.2003	0.93382	0.72614	0.95342	0	0	1.5599	0.519967	0	0	0.2637	0.0879	0.63911	0.60869	1.8368	1.0282	0	0	0	0	0	0	0	0
Splicing factor 3B subunit 3 OS=Homo sapiens GN=SF3B3 PE=1 SV=4	SF3B3_HUMAN	136 kDa	0.40008	2.6616	1.2524	1.43803	2.1171	1.7148	1.2027	1.6782	0	0.613	0	0.204333	0.907	0.60869	0.53796	0.68455	0	1.8459	0.38774	0.744547	0	0	0	0
Transcription intermediary factor 1-beta OS=Homo sapiens GN=TRIM28 PE=1 SV=5	TIF1B_HUMAN	89 kDa	0.80017	0.31127	1.8547	0.988713	0	0	5.9846	1.99487	1.0194	0.34128	0	0.45356	0	0.631	0.64941	0.426803	0	0	0	0	0	9.0242	0	3.00807
Mitochondrial import inner membrane translocase subunit TIM44 OS=Homo sapiens GN=TIMM44 PE=1 SV=2	TIM44_HUMAN	51 kDa	0.80017	0.94574	0	0.58197	0	0	0	0	0.98063	1.5325	1.3185	1.27721	0	0	1.4006	0.466867	0.55285	0	0.48762	0.346823	0	0	0	0
Exosome component 10 OS=Homo sapiens GN=EXOSC10 PE=1 SV=2	EXOSX_HUMAN	101 kDa	0	0	1.2524	0.417467	2.9381	5.6292	6.3459	4.97107	0	0.94363	1.6348	0.859477	1.5251	1.3672	1.3696	1.42063	0	0	1.4313	0.4771	0	0	0	0
Triokinase/FMN cyclase OS=Homo sapiens GN=TKFC PE=1 SV=2	TKFC_HUMAN	59 kDa	0	0	0.72614	0.242047	0	0	0.38997	0.12999	0	0.91949	0.2637	0.394397	0	0	0.3247	0.108233	0	1.0226	1.4628	0.828467	0	3.7552	0.42186	1.39235
Coatomer subunit beta OS=Homo sapiens GN=COPB1 PE=1 SV=3	COPB_HUMAN	107 kDa	0	0	1.2524	0.417467	0	0	0	0	0.67958	1.0238	0	0.567793	0	0.3155	0	0.105167	0.91913	1.6621	1.6909	1.42404	0	4.2033	0	1.4011
26S proteasome non-ATPase regulatory subunit 6 OS=Homo sapiens GN=PSMD6 PE=1 SV=1	PSMD6_HUMAN	46 kDa	0.80017	0.93382	1.0892	0.941063	0	0	0	0	0	0	0	0	0	0	0.64941	0.21647	0	1.5339	0.97523	0.836377	0.40497	2.3007	0.84372	1.18313
Coatomer subunit gamma-1 OS=Homo sapiens GN=COPG1 PE=1 SV=1	COPG1_HUMAN	98 kDa	1.5126	0.31127	0	0.607957	0	0	0	0	0.64084	0.64778	0.33049	0.539703	0	0	0	0	0	0.38373	2.2383	0.87401	71.904	2.6469	0	24.8503
Fatty acid desaturase 2 OS=Homo sapiens GN=FADS2 PE=1 SV=1	FADS2_HUMAN	52 kDa	0	0	0	0	0	0	0	0	0	0	0	0	0.76257	0	0	0.25419	1.8383	2.5568	1.4313	1.94213	3.6392	2.6695	2.4725	2.92707
Fibronectin type-III domain-containing protein 3A OS=Homo sapiens GN=FNDC3A PE=1 SV=4	FND3A_HUMAN	132 kDa	0.40008	0	2.224	0.874693	1.8421	0	0.77994	0.874013	0	0	0.66098	0.220327	1.0103	0.631	0	0.5471	0	1.5339	0	0.5113	1.6199	0.76689	0.42186	0.936217
Importin-7 OS=Homo sapiens GN=IPO7 PE=1 SV=1	IPO7_HUMAN	120 kDa	0.80017	0.93382	0.36307	0.69902	0	0	0.38997	0.12999	0	0.613	0.7911	0.468033	0	0	0.59368	0.197893	0	1.5339	0	0.5113	0	1.9172	0.84372	0.920307
Protein Red OS=Homo sapiens GN=IK PE=1 SV=3	RED_HUMAN	66 kDa	0.80017	1.5098	1.6154	1.30846	0	0.37076	0	0.123587	0	0	0	0	5.6098	2.0508	0.3247	2.66177	0	0	4.718	1.57267	0	0	0.42186	0.14062
26S protease regulatory subunit 6B OS=Homo sapiens GN=PSMC4 PE=1 SV=2	PRS6B_HUMAN	47 kDa	0	0	0.36307	0.121023	0.73453	0	0	0.244843	0.98063	2.3087	2.2957	1.86168	0.67355	0.3155	0	0.329683	1.0474	0	0.97523	0.67421	0.40497	0.76689	0	0.39062
60S ribosomal protein L7-like 1 OS=Homo sapiens GN=RPL7L1 PE=1 SV=1	RL7L_HUMAN	29 kDa	0	2.1912	3.7094	1.96687	0.69356	0.85742	3.7651	1.77203	0.67958	0	0	0.226527	1.3127	1.3146	0.64941	1.09224	3.6765	0	0	1.2255	0	0	0	0
Cytochrome c oxidase subunit 7A-related protein, mitochondrial OS=Homo sapiens GN=COX7A2L PE=1 SV=2	COX7R_HUMAN	13 kDa	1.6003	0	0	0.533433	0	0.66098	0.29534	0.318773	0.30105	0.613	0	0.304683	0	0.60869	1.1874	0.598697	0	0.76745	0.77548	0.51431	0	0.37023	1.2621	0.54411
Cytochrome c oxidase subunit 7C, mitochondrial OS=Homo sapiens GN=COX7C PE=1 SV=1	COX7C_HUMAN	7 kDa	0.34644	0	0.90402	0.41682	0	0.66098	0.59068	0.41722	0.6021	0.613	0.2637	0.492933	0.60467	0.60869	0.53796	0.583773	0.49458	0.38373	0.38774	0.422017	1.1856	0.37023	0.8367	0.79751
Choline-phosphate cytidylyltransferase A OS=Homo sapiens GN=PCYT1A PE=1 SV=2	PCY1A_HUMAN	42 kDa	0	0	0	0	0.73906	0.37076	0	0.36994	0	0	0	0	0	0	0	0	1.1057	1.0226	1.9505	1.3596	0.40497	3.8053	2.1058	2.10536
Ras-related protein Rab-18 OS=Homo sapiens GN=RAB18 PE=1 SV=1	RAB18_HUMAN	23 kDa	1.3858	0.31723	0	0.567677	0	0	0.29534	0.0984467	0	1.226	1.3185	0.848167	0.30233	0.91303	0.53796	0.58444	0.49458	0.38373	0	0.29277	0.59282	0	0	0.197607
E3 ubiquitin-protein ligase TRIP12 OS=Homo sapiens GN=TRIP12 PE=1 SV=1	TRIPC_HUMAN	220 kDa	0	0	0	0	6.2072	0.66098	2.1772	3.01513	0.33979	0.3065	0	0.21543	0.60467	0.91303	0.86266	0.793453	0	0	0	0	0	1.1355	0	0.3785
UDP-glucose 6-dehydrogenase OS=Homo sapiens GN=UGDH PE=1 SV=1	UGDH_HUMAN	55 kDa	0.40008	2.6616	1.955	1.67223	0.73453	0	0.38997	0.374833	0.67958	1.602	0.7911	1.02423	0	0	0	0	0	0	0.38774	0.129247	0	0	0	0
TATA-binding protein-associated factor 2N OS=Homo sapiens GN=TAF15 PE=1 SV=1	RBP56_HUMAN	62 kDa	0	0	4.4481	1.4827	4.7416	7.8288	4.4941	5.68817	0	0	4.0868	1.36227	4.5008	2.9784	3.3325	3.6039	0	0	0	0	0.40497	0	0	0.13499
Alanine--tRNA ligase, cytoplasmic OS=Homo sapiens GN=AARS PE=1 SV=2	SYAC_HUMAN	107 kDa	0.74652	0.93978	1.2054	0.9639	0	0	0	0	0	0	0.2637	0.0879	0	0	0	0	0	1.1512	3.2018	1.451	0	0.37023	0	0.12341
Translationally-controlled tumor protein OS=Homo sapiens GN=TPT1 PE=1 SV=1	TCTP_HUMAN	20 kDa	0	0.62255	0.36307	0.32854	0	0	0	0	0	0	0	0	0	0	0	0	2.2114	2.5565	1.9505	2.23947	0.40497	0	2.1093	0.83809
DDRGK domain-containing protein 1 OS=Homo sapiens GN=DDRGK1 PE=1 SV=2	DDRGK_HUMAN	36 kDa	0	0	0.30134	0.100447	0	0.33049	0.88603	0.405507	0.33979	0	0	0.113263	0	0	0.86266	0.287553	1.0474	0.5113	0	0.519567	2.8055	0.76689	0.84372	1.47204
Eukaryotic translation initiation factor 3 subunit I OS=Homo sapiens GN=EIF3I PE=1 SV=1	EIF3I_HUMAN	37 kDa	0	1.7744	1.8785	1.21763	0.73453	0	0	0.244843	0	0	0.81738	0.27246	0	0	0	0	0	4.6025	2.8625	2.48833	0	3.798	0	1.266
Serine hydroxymethyltransferase, mitochondrial OS=Homo sapiens GN=SHMT2 PE=1 SV=3	GLYM_HUMAN	56 kDa	2.6787	0	4.2201	2.2996	0	0.33049	0.29534	0.20861	0	0.613	0	0.204333	0	0	0	0	0	2.5575	0.77548	1.11099	0	0	0	0
Ras GTPase-activating-like protein IQGAP1 OS=Homo sapiens GN=IQGAP1 PE=1 SV=1	IQGA1_HUMAN	189 kDa	0	2.0857	2.7046	1.59677	0	0	1.6873	0.562433	0.33979	0	0.5274	0.289063	0	0	0	0	0.55285	0	0	0.184283	0	1.1371	0	0.379033
CAD protein OS=Homo sapiens GN=CAD PE=1 SV=3	PYR1_HUMAN	243 kDa	0.40008	1.7744	8.691	3.62183	0.73453	0	9.5189	3.41781	0	0	1.0811	0.360367	0	0	0	0	0	0	0	0	0	0	0	0
39S ribosomal protein L4, mitochondrial OS=Homo sapiens GN=MRPL4 PE=1 SV=1	RM04_HUMAN	35 kDa	0.40008	0.93382	1.0892	0.8077	0.36953	0.74152	0.38997	0.50034	2.4261	0.68255	0	1.03622	0	0.3155	0.64941	0.321637	0	0	0	0	0	0	0.84372	0.28124
39S ribosomal protein L45, mitochondrial OS=Homo sapiens GN=MRPL45 PE=1 SV=2	RM45_HUMAN	35 kDa	0	1.1985	1.6154	0.937967	0	0	4.0194	1.3398	0	0	0	0	0	0	0	0	0	2.3012	0.48762	0.929607	0	3.8126	0.81439	1.54233
THO complex subunit 2 OS=Homo sapiens GN=THOC2 PE=1 SV=2	THOC2_HUMAN	183 kDa	1.1661	1.7744	1.5537	1.49807	2.9381	0.85742	1.2973	1.69761	0	0.94363	0.2637	0.402443	1.8275	0.6836	0.53796	1.01635	0	0	0	0	0	0	1.7644	0.588133
Ribosome biogenesis protein WDR12 OS=Homo sapiens GN=WDR12 PE=1 SV=2	WDR12_HUMAN	48 kDa	0	0	0.36307	0.121023	1.1086	1.4428	0	0.850467	0.67958	0.34128	0.99147	0.670777	1.3471	1.262	0	0.8697	0	0	0	0	0	0	0	0
Canalicular multispecific organic anion transporter 1 OS=Homo sapiens GN=ABCC2 PE=1 SV=3	MRP2_HUMAN	174 kDa	0.80017	0.62255	0.36307	0.595263	0.36953	0	0.59068	0.32007	0.33979	0.68255	0	0.34078	0	0.3155	1.5121	0.6092	0	0	0	0	0.99779	0.38344	0.84372	0.74165
Nucleoporin NUP188 homolog OS=Homo sapiens GN=NUP188 PE=1 SV=1	NU188_HUMAN	196 kDa	0	0.62255	1.0892	0.570583	0	0.37076	0	0.123587	1.0194	2.3087	0	1.10937	0	0	0.3247	0.108233	0	0.38373	0	0.12791	0.80995	0.76689	0.84372	0.806853
Ras-related protein Rab-32 OS=Homo sapiens GN=RAB32 PE=1 SV=3	RAB32_HUMAN	25 kDa	0	4.6629	5.9231	3.52867	0.36953	0.37076	0	0.246763	0	0.34128	0	0.11376	0	0.3155	0	0.105167	0	2.9971	0.48762	1.16157	0	4.5421	0	1.51403
Annexin A6 OS=Homo sapiens GN=ANXA6 PE=1 SV=3	ANXA6_HUMAN	76 kDa	0.40008	0.31127	0.36307	0.35814	0	0	0	0	0	0	0.33049	0.110163	0	0	0	0	0	0	2.4065	0.802167	0	4.9848	0	1.6616
Retinol dehydrogenase 13 OS=Homo sapiens GN=RDH13 PE=1 SV=2	RDH13_HUMAN	36 kDa	0	0	0	0	0.32403	0.33049	0	0.218173	0.6021	0.91949	1.3185	0.946697	1.2093	0.60869	0.53796	0.785317	0	0	0	0	0	0.38344	0	0.127813
Cytochrome c OS=Homo sapiens GN=CYCS PE=1 SV=2	CYC_HUMAN	12 kDa	0	0	0	0	0	0	0.77994	0.25998	0	0	0	0	0.33678	0	0	0.11226	0.49458	1.7901	0.38774	0.890807	1.8077	2.6445	0	1.48407
Eukaryotic translation initiation factor 2 subunit 1 OS=Homo sapiens GN=EIF2S1 PE=1 SV=3	IF2A_HUMAN	36 kDa	0	0.8872	1.2524	0.7132	0	0	0	0	0	0	0	0	0	0	0	0	0	2.685	0	0.895	1.7785	3.798	4.0943	3.2236
Canalicular multispecific organic anion transporter 2 OS=Homo sapiens GN=ABCC3 PE=1 SV=3	MRP3_HUMAN	169 kDa	1.2003	1.5098	1.8785	1.52953	0	0	0.90736	0.302453	1.6989	0	0	0.5663	0	0	1.2988	0.432933	0	0	0	0	0	2.2562	0	0.752067
Zinc finger CCCH-type antiviral protein 1 OS=Homo sapiens GN=ZC3HAV1 PE=1 SV=3	ZCCHV_HUMAN	101 kDa	0	10.919	5.1907	5.3699	0	0	3.4698	1.1566	0	0	0	0	0	0	0	0	0.91913	7.461	0	2.79338	3.141	3.7676	2.0608	2.9898
Heterogeneous nuclear ribonucleoprotein L-like OS=Homo sapiens GN=HNRNPLL PE=1 SV=1	HNRLL_HUMAN	60 kDa	0	1.7744	0.62618	0.800193	1.4691	3.8004	0.38997	1.88649	0.33979	0.68255	0	0.34078	2.6245	0.6836	0.6848	1.33097	0	0	0.71563	0.238543	0	0	0	0
UDP-glucuronosyltransferase 2A3 OS=Homo sapiens GN=UGT2A3 PE=2 SV=2	UD2A3_HUMAN	60 kDa	0	2.1912	0	0.7304	1.4725	3.1537	3.3214	2.6492	46.951	26.954	16.365	30.09	20.727	19.273	10.073	16.691	23.546	7.6935	6.3331	12.5242	45.233	18.477	21.186	28.2987
U3 small nucleolar RNA-associated protein 6 homolog OS=Homo sapiens GN=UTP6 PE=2 SV=2	UTP6_HUMAN	70 kDa	1.1661	2.0916	3.4529	2.23687	0.73453	2.0856	4.1811	2.33374	0	0	0.33049	0.110163	0.67355	0	0	0.224517	0	0	0	0	0	0	0	0
Serine/arginine-rich splicing factor 7 OS=Homo sapiens GN=SRSF7 PE=1 SV=1	SRSF7_HUMAN	27 kDa	0.40008	0.63447	0.96575	0.666767	1.0176	0.66098	0.59068	0.75642	0	0	0.7911	0.2637	0.30233	0.30434	0	0.202223	0	0.38373	0.97523	0.452987	0	0	0	0
mRNA turnover protein 4 homolog OS=Homo sapiens GN=MRTO4 PE=1 SV=2	MRT4_HUMAN	28 kDa	0	0.62255	0.36307	0.32854	1.4736	3.8004	0.77994	2.01798	0	0	0.2637	0.0879	0.67355	1.3146	1.0095	0.999217	0	0	0	0	0	0	0	0
Telomere-associated protein RIF1 OS=Homo sapiens GN=RIF1 PE=1 SV=2	RIF1_HUMAN	274 kDa	0	0	0.72614	0.242047	0	0.70125	0.29534	0.332197	0.33979	0.34128	0.33049	0.337187	1.9173	1.2508	0.86266	1.34359	0	0	0	0	0	0	0	0
Outer capsid protein VP4 OS=Rotavirus A (strain Human/United States/P/1974 G3-P1A[8]-I1-R1-C1-M1-A1-N1-T1-E1-H1) PE=3 SV=2	sp|P11195|VP4_ROTHP	?	1.0393	0.31723	0	0.452177	0.32403	0.66098	0.29534	0.426783	0.6021	0.613	0.5274	0.580833	0.60467	1.5217	0.26898	0.79845	0	0	0.77548	0.258493	0	0	0	0
Peroxiredoxin-5, mitochondrial OS=Homo sapiens GN=PRDX5 PE=1 SV=4	PRDX5_HUMAN	22 kDa	0	1.2689	0	0.422967	0	0	0.29534	0.0984467	1.2042	1.8631	0.5274	1.19823	0.76257	0	0	0.25419	0	0.76745	0.77548	0.51431	0	0	0	0
CD166 antigen OS=Homo sapiens GN=ALCAM PE=1 SV=2	CD166_HUMAN	65 kDa	0	0	0	0	0	0	0	0	0	0	0	0	0	0	0	0	0	1.5349	2.0386	1.19117	2.9934	1.1371	0.84372	1.65807
AP-1 complex subunit gamma-1 OS=Homo sapiens GN=AP1G1 PE=1 SV=5	AP1G1_HUMAN	91 kDa	0.80017	0.31127	1.4523	0.85458	0.73906	0.37076	0	0.36994	0	0.34128	0	0.11376	0	0.94649	0	0.315497	0	0	0.87535	0.291783	0	1.5338	0	0.511267
Cytochrome b-245 light chain OS=Homo sapiens GN=CYBA PE=1 SV=3	CY24A_HUMAN	21 kDa	0	0	0	0	1.1086	1.1123	0	0.7403	0	0	0	0	0.67355	0.631	0.3247	0.543083	0	0	0	0	0.80995	1.1371	1.6874	1.21148
Glucose-6-phosphate 1-dehydrogenase OS=Homo sapiens GN=G6PD PE=1 SV=4	G6PD_HUMAN	59 kDa	1.1661	1.7744	4.3832	2.44123	0	0	0.90736	0.302453	0	0	0	0	0	0	0	0	0	3.0683	2.1469	1.7384	0	1.5192	0	0.5064
H/ACA ribonucleoprotein complex subunit 1 OS=Homo sapiens GN=GAR1 PE=1 SV=1	GAR1_HUMAN	22 kDa	0.80017	1.2451	0.36307	0.80278	0.36953	0.37076	0	0.246763	0	0.68255	0	0.227517	0.67355	0.3155	0.64941	0.546153	0	0	1.9505	0.650167	0	0	0	0
Lon protease homolog, mitochondrial OS=Homo sapiens GN=LONP1 PE=1 SV=2	LONM_HUMAN	106 kDa	0.40008	0.31127	2.8204	1.17725	0	0	0.29534	0.0984467	0	1.5673	0.5274	0.698233	0	0	0.59368	0.197893	0	0	0.87535	0.291783	0	0.74046	0	0.24682
Myc-associated zinc finger protein OS=Homo sapiens GN=MAZ PE=1 SV=1	MAZ_HUMAN	49 kDa	0	2.1912	3.7094	1.96687	6.2442	6.3074	2.6422	5.0646	0	0	0	0	0	0	0	0	0	5.7701	6.3331	4.0344	0	5.9863	2.0608	2.68237
Protein odr-4 homolog OS=Homo sapiens GN=ODR4 PE=1 SV=1	ODR4_HUMAN	51 kDa	0	0.31127	0.36307	0.22478	0	0	0.38997	0.12999	0	0	0	0	0	0	0.3247	0.108233	1.8383	1.5342	2.8625	2.07833	1.0097	2.2861	2.0506	1.78213
Obg-like ATPase 1 OS=Homo sapiens GN=OLA1 PE=1 SV=2	OLA1_HUMAN	45 kDa	0	2.1728	5.7004	2.6244	0	0	3.173	1.05767	0	0	0	0	0	0	0	0	0	2.3012	0.71563	1.00561	0	5.3172	0	1.7724
26S proteasome non-ATPase regulatory subunit 2 OS=Homo sapiens GN=PSMD2 PE=1 SV=3	PSMD2_HUMAN	100 kDa	0	2.1728	1.8382	1.337	0.73906	0.85742	0	0.53216	0	0.91949	0.33049	0.41666	0.33678	0	0	0.11226	0	0	0.97523	0.325077	0	3.7916	0	1.26387
Testis-expressed sequence 10 protein OS=Homo sapiens GN=TEX10 PE=1 SV=2	TEX10_HUMAN	106 kDa	1.2003	0.62255	0.36307	0.72864	0.36953	0.74152	0.38997	0.50034	0.33979	0.34128	0.5274	0.402823	0.67355	0.3155	0.97411	0.654387	0	0	0	0	0	0	0	0
MICOS complex subunit MIC13 OS=Homo sapiens GN=MIC13 PE=1 SV=1	MIC13_HUMAN	13 kDa	0	0	0	0	1.9442	0	0.29534	0.746513	0	0	0.5274	0.1758	0	0.30434	1.0759	0.46008	0	0	0	0	0	0	0	0
Protein S100-P OS=Homo sapiens GN=S100P PE=1 SV=2	S100P_HUMAN	10 kDa	1.7322	0.63447	0.90402	1.09023	0	0.33049	0	0.110163	0.6021	0.3065	0.5274	0.478667	0	0.30434	0	0.101447	0.49458	0	0.38774	0.294107	0	0.37023	0	0.12341
26S proteasome non-ATPase regulatory subunit 12 OS=Homo sapiens GN=PSMD12 PE=1 SV=3	PSD12_HUMAN	53 kDa	0.69288	0.63447	0.60268	0.643343	0.64806	1.322	0.29534	0.755133	0.30105	0.91949	0.5274	0.582647	0	0.30434	0	0.101447	0	0	0	0	0	0	0	0
Uncharacterized protein KIAA1109 OS=Homo sapiens GN=KIAA1109 PE=1 SV=2	K1109_HUMAN	555 kDa	1.5126	3.0601	0.60268	1.72513	1.3416	0.37076	6.063	2.59179	0	0	0	0	0	0.30434	0	0.101447	0	0	0	0	0	0	0	0
Aldo-keto reductase family 1 member B10 OS=Homo sapiens GN=AKR1B10 PE=1 SV=2	AK1BA_HUMAN	36 kDa	0	0	1.8785	0.626167	0	0.85742	0	0.285807	0.87328	3.7745	1.6348	2.09419	0	0	0	0	0	0.76708	2.8625	1.20986	0	2.2788	0	0.7596
Aldo-keto reductase family 1 member B15 OS=Homo sapiens GN=AKR1B15 PE=1 SV=2	AK1BF_HUMAN	37 kDa	0	0	1.2524	0.417467	0	0.85742	0	0.285807	0.87328	3.7745	1.6348	2.09419	0	0	0	0	0	0.76708	2.1469	0.971327	0	1.5192	0	0.5064
Coronin-1C OS=Homo sapiens GN=CORO1C PE=1 SV=1	COR1C_HUMAN	53 kDa	0	0.31127	1.0892	0.466823	0	0.37076	0.38997	0.253577	0	0	0	0	0	0	0	0	0	0	0	0	1.6199	1.9172	1.2656	1.6009
NADH dehydrogenase [ubiquinone] 1 beta subcomplex subunit 9 OS=Homo sapiens GN=NDUFB9 PE=1 SV=3	NDUB9_HUMAN	22 kDa	0	0.31127	0.36307	0.22478	0.73906	1.1123	0.77994	0.8771	0	0	0.66098	0.220327	0.67355	0.631	0	0.43485	0	1.0226	0.97523	0.665943	0	0	0	0
Procollagen-lysine,2-oxoglutarate 5-dioxygenase 3 OS=Homo sapiens GN=PLOD3 PE=1 SV=1	PLOD3_HUMAN	85 kDa	0	8.6914	6.6721	5.12117	5.8901	9.0253	1.5865	5.50063	0	0	0	0	0	0	0	0	0	0	0	0	0	0	0	0
Trifunctional purine biosynthetic protein adenosine-3 OS=Homo sapiens GN=GART PE=1 SV=1	PUR2_HUMAN	108 kDa	0.74652	1.257	2.055	1.35284	0	0	0	0	0.6021	0.613	0.5274	0.580833	0	0	0	0	0	0	0.71563	0.238543	0	0	0	0
Multidrug resistance-associated protein 1 OS=Homo sapiens GN=ABCC1 PE=1 SV=3	MRP1_HUMAN	172 kDa	3.4775	0	0.72614	1.40121	0.36953	0	1.5599	0.643143	0.33979	0	0.33049	0.223427	21.109	21.657	0	14.2553	0.55285	0.5113	0	0.354717	0.80995	0.38344	0	0.397797
Cleavage stimulation factor subunit 3 OS=Homo sapiens GN=CSTF3 PE=1 SV=1	CSTF3_HUMAN	83 kDa	0.34644	0.31723	0	0.221223	1.8431	2.3758	0.59068	1.60319	0	0	0.2637	0.0879	1.8275	0.6836	0	0.837033	0	0	0	0	0	0	0	0
Paired amphipathic helix protein Sin3a OS=Homo sapiens GN=SIN3A PE=1 SV=2	SIN3A_HUMAN	145 kDa	0	0.8872	0.62618	0.50446	5.1486	3.9144	0.77994	3.28098	0.87328	0	0.81738	0.563553	1.5251	0.9991	0.64941	1.05787	0	0	0	0	0	0	0	0
NADH-cytochrome b5 reductase 1 OS=Homo sapiens GN=CYB5R1 PE=1 SV=1	NB5R1_HUMAN	34 kDa	0	1.7744	0	0.591467	1.8386	0.85742	0.77994	1.15865	0	0.68255	0.66098	0.447843	0.67355	0.631	0.91839	0.74098	0	0	0	0	0	0	0	0
Nucleosome assembly protein 1-like 1 OS=Homo sapiens GN=NAP1L1 PE=1 SV=1	NP1L1_HUMAN	45 kDa	0.80017	0.93382	0.36307	0.69902	0	0.37076	0.38997	0.253577	1.6602	0	0	0.5534	0.30233	0	0	0.100777	1.1057	0	0	0.368567	0	0	0	0
Apoptosis regulator BAX OS=Homo sapiens GN=BAX PE=1 SV=1	BAX_HUMAN	21 kDa	0.34644	0.31723	0.30134	0.32167	0.32403	0.33049	0	0.218173	0.90315	0.3065	0.2637	0.491117	0.907	0.30434	0.26898	0.49344	0	0	0.38774	0.129247	0.59282	0.37023	0	0.321017
Asparagine synthetase [glutamine-hydrolyzing] OS=Homo sapiens GN=ASNS PE=1 SV=4	ASNS_HUMAN	64 kDa	0.69288	1.5683	2.3174	1.52619	0	0.33049	0	0.110163	0.30105	0.613	0.2637	0.392583	0	0	0	0	0	0	0.48762	0.16254	0	0	0	0
Malate dehydrogenase, mitochondrial OS=Homo sapiens GN=MDH2 PE=1 SV=3	MDHM_HUMAN	36 kDa	0	0.31127	1.6302	0.647157	0.73906	0	0.29534	0.3448	0	0	0	0	0	0	0	0	0	1.5339	0.97523	0.836377	0.80995	0.38344	0.42186	0.538417
Nucleolar complex protein 2 homolog OS=Homo sapiens GN=NOC2L PE=1 SV=4	NOC2L_HUMAN	85 kDa	1.1466	0.31127	1.4523	0.970057	0.64806	0	1.1699	0.605987	0	0.3065	0.2637	0.190067	0	0.3155	0.59368	0.30306	0	0	0	0	0	0	0	0
Protein OS-9 OS=Homo sapiens GN=OS9 PE=1 SV=1	OS9_HUMAN	76 kDa	0	0	0	0	0.73906	0	1.2973	0.678787	0	0.94363	0	0.314543	2.5355	2.3137	0	1.6164	0	0	0	0	0	0.75367	0.81439	0.522687
Periodic tryptophan protein 2 homolog OS=Homo sapiens GN=PWP2 PE=2 SV=2	PWP2_HUMAN	102 kDa	1.5467	0.94574	0.72614	1.07286	0.97209	0	1.8552	0.94243	0	0	0	0	0.30233	0	0	0.100777	0	0	0	0	0	0	0	0
Ribosomal RNA processing protein 1 homolog A OS=Homo sapiens GN=RRP1 PE=1 SV=1	RRP1_HUMAN	53 kDa	0.80017	0	0	0.266723	0	0.37076	0.38997	0.253577	0.98063	1.3651	0.33049	0.892073	0.33678	0.631	0.64941	0.539063	0	0	0.38774	0.129247	0	0	0	0
Zinc transporter ZIP14 OS=Homo sapiens GN=SLC39A14 PE=1 SV=3	S39AE_HUMAN	54 kDa	0	0	0	0	0	0	0	0	0	0	0	0	0.30233	0	0.91839	0.406907	0	0	0	0	2.5884	1.8908	1.6804	2.0532
Structural maintenance of chromosomes protein 1A OS=Homo sapiens GN=SMC1A PE=1 SV=2	SMC1A_HUMAN	143 kDa	1.1466	0.31127	0	0.485957	0.36953	0	0.29534	0.221623	1.3592	0	0	0.453067	1.3127	0	0.53796	0.616887	0	0	0	0	0.40497	0	0.42186	0.27561
Syntaxin-binding protein 2 OS=Homo sapiens GN=STXBP2 PE=1 SV=2	STXB2_HUMAN	66 kDa	0	0	1.2524	0.417467	0.36953	0	0	0.123177	0	0	0	0	0.76257	0.3155	0	0.359357	4.6916	3.38	0.87535	2.98232	0.80995	1.1503	1.7644	1.24155
Glycine--tRNA ligase OS=Homo sapiens GN=GARS PE=1 SV=3	SYG_HUMAN	83 kDa	0	6.4373	7.3158	4.58437	0.32403	0	1.5865	0.636843	0	0.34128	0	0.11376	0	0	0	0	0	0	0	0	0	0.7596	0	0.2532
Transmembrane protein 70, mitochondrial OS=Homo sapiens GN=TMEM70 PE=1 SV=2	TMM70_HUMAN	29 kDa	1.2003	0.62255	0.36307	0.72864	1.4781	0	0.77994	0.75268	0.67958	0	0	0.226527	0.33678	0.631	0.3247	0.430827	0	0	0	0	0	0	0	0
Triosephosphate isomerase OS=Homo sapiens GN=TPI1 PE=1 SV=3	TPIS_HUMAN	31 kDa	2.0004	4.9682	2.9502	3.30627	0	0	0	0	0	0.34128	0.33049	0.223923	0	0	0	0	0	0	0.38774	0.129247	0	2.271	0	0.757
Transient receptor potential cation channel subfamily V member 2 OS=Homo sapiens GN=TRPV2 PE=1 SV=1	TRPV2_HUMAN	86 kDa	0.34644	0.8872	1.2524	0.82868	1.4691	1.7148	2.5947	1.9262	0	1.226	0	0.408667	0.63911	0	0	0.213037	0	0	0	0	0	0	0	0
UDP-glucose:glycoprotein glucosyltransferase 1 OS=Homo sapiens GN=UGGT1 PE=1 SV=3	UGGG1_HUMAN	177 kDa	1.5662	0.93382	1.9785	1.49284	0.36953	0	0	0.123177	0	1.6262	0.33049	0.65223	0	0.3155	0.3247	0.2134	0	0	0.48762	0.16254	0	0.38344	0	0.127813
Immediate early response 3-interacting protein 1 OS=Homo sapiens GN=IER3IP1 PE=1 SV=1	IR3IP_HUMAN	9 kDa	0	0	0	0	0.32403	0.66098	0.88603	0.62368	0.30105	0	0.2637	0.18825	0.60467	0.30434	0	0.303003	0	0.38373	0	0.12791	1.1856	0.74046	0.41835	0.78147
Protein S100-A16 OS=Homo sapiens GN=S100A16 PE=1 SV=1	S10AG_HUMAN	12 kDa	0.40008	0	0.62618	0.342087	2.9381	2.5723	1.8147	2.4417	0.33979	0.34128	0	0.227023	0	1.3672	1.3342	0.900467	0	0	0	0	0	0	0	0
Ancient ubiquitous protein 1 OS=Homo sapiens GN=AUP1 PE=1 SV=1	AUP1_HUMAN	53 kDa	1.1661	0	0.30134	0.489147	0.73453	0	0.68531	0.47328	0.30105	0	0	0.10035	0.67355	0.61984	2.5924	1.29526	0	0	0	0	0	3.4066	0	1.13553
RNA-binding protein 8A OS=Homo sapiens GN=RBM8A PE=1 SV=1	RBM8A_HUMAN	20 kDa	0.34644	0.62851	0.72614	0.56703	0.73906	1.4025	0.77994	0.973833	0	0	0.66098	0.220327	0.33678	0.631	0	0.322593	0	0	0	0	0	0	0	0
Heat shock protein 105 kDa OS=Homo sapiens GN=HSPH1 PE=1 SV=1	HS105_HUMAN	97 kDa	0.80017	0.62255	1.3288	0.917173	0	0	0	0	0	0.68255	0	0.227517	0	0	0.64941	0.21647	0	0	1.9505	0.650167	0	1.5338	0	0.511267
Succinyl-CoA ligase [ADP/GDP-forming] subunit alpha, mitochondrial OS=Homo sapiens GN=SUCLG1 PE=1 SV=4	SUCA_HUMAN	36 kDa	1.1661	0.8872	1.8785	1.3106	1.4691	0	0	0.4897	1.8539	0.68255	0.33049	0.955647	0	0	0	0	0	1.1508	0	0.3836	0	0	0	0
Aminoacyl tRNA synthase complex-interacting multifunctional protein 1 OS=Homo sapiens GN=AIMP1 PE=1 SV=2	AIMP1_HUMAN	34 kDa	1.1661	0.31127	1.2906	0.922657	0	0	0	0	0	0	1.0811	0.360367	2.2877	1.6827	0	1.32347	0.55285	0	1.4313	0.661383	0	0	0.81439	0.271463
Coatomer subunit delta OS=Homo sapiens GN=ARCN1 PE=1 SV=1	COPD_HUMAN	57 kDa	0	0	0	0	0	0	0	0	0.64084	0	0	0.213613	0	0	0	0	1.542	0.76745	0.97523	1.09489	0.80995	1.5338	0.84372	1.06249
Endoplasmic reticulum lectin 1 OS=Homo sapiens GN=ERLEC1 PE=1 SV=1	ERLEC_HUMAN	55 kDa	0	0.8872	0.72614	0.53778	0.36953	0	0	0.123177	0	0.3065	0.92468	0.410393	0.33678	0.3155	0.64941	0.433897	0	0	1.2032	0.401067	0.40497	1.143	0	0.51599
Protein FAM3C OS=Homo sapiens GN=FAM3C PE=1 SV=1	FAM3C_HUMAN	25 kDa	0.69288	0	0	0.23096	0	0	0.59068	0.196893	0.6021	0.613	0.5274	0.580833	0	0.30434	0.26898	0.191107	0.55285	0.38373	0	0.312193	0	0.74046	0.41835	0.38627
High mobility group protein B3 OS=Homo sapiens GN=HMGB3 PE=1 SV=4	HMGB3_HUMAN	23 kDa	0	0	0	0	0	0	0	0	0	0	0	0	0	0	0	0	1.542	0	1.363	0.968333	2.0249	1.1107	2.9425	2.02603
Unconventional myosin-VI OS=Homo sapiens GN=MYO6 PE=1 SV=4	MYO6_HUMAN	150 kDa	0	1.7744	2.5047	1.42637	2.9381	1.7148	2.7221	2.45833	0	0	0	0	0	0	0.6848	0.228267	0	0	0	0	0	1.1355	0	0.3785
Paternally-expressed gene 3 protein OS=Homo sapiens GN=PEG3 PE=1 SV=1	PEG3_HUMAN	181 kDa	0	0	3.7094	1.23647	0.73453	0	1.7349	0.823143	5.4664	2.7189	0	2.72843	0	0	0	0	0	3.8467	6.3331	3.39327	5.992	0	4.1215	3.37117
Phenylalanine-4-hydroxylase OS=Homo sapiens GN=PAH PE=1 SV=1	PH4H_HUMAN	52 kDa	0	0	0	0	0	0	0	0	0	0	1.6348	0.544933	0	0	0	0	1.8383	3.0683	1.4313	2.11263	0	4.5576	0.81439	1.79066
Splicing factor U2AF 35 kDa subunit OS=Homo sapiens GN=U2AF1 PE=1 SV=3	U2AF1_HUMAN (+1)	28 kDa	0	0.31127	3.4764	1.26256	0	0	3.9529	1.31763	1.2042	0	0	0.4014	0.60467	0	0	0.201557	0	0	0.77548	0.258493	0	0	0	0
Protein disulfide-isomerase A5 OS=Homo sapiens GN=PDIA5 PE=1 SV=1	PDIA5_HUMAN	60 kDa	2.0553	2.1728	7.2983	3.84213	0	0	0	0	0	0.34128	0.66098	0.334087	0	0	0	0	0	1.0226	0	0.340867	0	1.8951	1.7644	1.21983
Regulator of microtubule dynamics protein 3 OS=Homo sapiens GN=RMDN3 PE=1 SV=2	RMD3_HUMAN	52 kDa	1.093	0.31723	0.36307	0.5911	0	0	0.29534	0.0984467	0.67958	0	0.5274	0.402327	0.60467	0.60869	0.80694	0.673433	0	0	0	0	0	0	0	0
Farnesyl pyrophosphate synthase OS=Homo sapiens GN=FDPS PE=1 SV=4	FPPS_HUMAN	48 kDa	0	0	0	0	0	0	0	0	0	0	0	0	0	0	0	0	0.49458	0	2.1384	0.87766	0	3.3981	0.41835	1.27215
Tubulin--tyrosine ligase-like protein 12 OS=Homo sapiens GN=TTLL12 PE=1 SV=2	TTL12_HUMAN	74 kDa	0.40008	1.7744	3.4701	1.88153	0	0	0.90736	0.302453	0.67958	1.0238	0.66098	0.78812	0	0	0	0	0	0	0	0	0	0	0	0
Serum albumin OS=Homo sapiens GN=ALB PE=1 SV=2	ALBU_HUMAN	69 kDa	0	0	0	0	0	0	0	0	4.2683	0.34128	0	1.53653	0	0	0.3247	0.108233	0.49458	0	0.71563	0.403403	1.2149	1.5338	2.4725	1.7404
Fructose-bisphosphate aldolase A OS=Homo sapiens GN=ALDOA PE=1 SV=2	ALDOA_HUMAN	39 kDa	0	0.31127	0.36307	0.22478	0	0	0	0	0	0	0	0	0	0	0	0	0	0.5113	1.4628	0.658033	0.40497	1.9172	1.6839	1.33536
3-hydroxyacyl-CoA dehydrogenase type-2 OS=Homo sapiens GN=HSD17B10 PE=1 SV=3	HCD2_HUMAN	27 kDa	0	0.8872	0.92752	0.604907	0	0.85742	0	0.285807	0.30105	0.3065	0	0.202517	1.5251	1.3672	1.6662	1.5195	1.8383	1.5342	0.71563	1.36271	0	0	0	0
Alpha-mannosidase 2 OS=Homo sapiens GN=MAN2A1 PE=1 SV=2	MA2A1_HUMAN	131 kDa	0	6.1201	4.9856	3.7019	0.36953	0	0.38997	0.253167	0	0	0	0	0	0	0	0	2.8534	0	0	0.951133	0	2.2788	0	0.7596
Procollagen-lysine,2-oxoglutarate 5-dioxygenase 1 OS=Homo sapiens GN=PLOD1 PE=1 SV=2	PLOD1_HUMAN	84 kDa	0	0	3.4764	1.1588	0	0	0	0	0.87328	0.3065	0.81738	0.66572	0.76257	0	0	0.25419	1.8383	1.5342	1.4313	1.60127	0	1.5192	0	0.5064
V-type proton ATPase subunit S1 OS=Homo sapiens GN=ATP6AP1 PE=1 SV=2	VAS1_HUMAN	52 kDa	0	1.7744	0.62618	0.800193	0	0.37076	0	0.123587	0	0.68255	0.66098	0.447843	0.67355	0.94649	0.97411	0.864717	0	0	0	0	0	0	0	0
Ras-related protein Rap-2b OS=Homo sapiens GN=RAP2B PE=1 SV=1	RAP2B_HUMAN	21 kDa	0	0	0.30134	0.100447	0	0	0	0	0	0.613	0.2637	0.292233	0	0	0.53796	0.17932	0	1.5349	0.77548	0.770127	1.1856	0.74046	0	0.64202
39S ribosomal protein L3, mitochondrial OS=Homo sapiens GN=MRPL3 PE=1 SV=1	RM03_HUMAN	39 kDa	3.4775	2.6616	2.5047	2.88127	1.4691	1.7148	2.7221	1.96867	0	0	0	0	0	0	0	0	0	0.5113	0	0.170433	0	0	0	0
PC4 and SFRS1-interacting protein OS=Homo sapiens GN=PSIP1 PE=1 SV=1	PSIP1_HUMAN	60 kDa	0	0.62255	0	0.207517	0.36953	0.37076	0	0.246763	0.67958	0	0	0.226527	1.0993	0	0.64941	0.582903	0	1.0226	0.48762	0.503407	4.3559	0.38344	0.42186	1.7204
DnaJ homolog subfamily B member 1 OS=Homo sapiens GN=DNAJB1 PE=1 SV=4	DNJB1_HUMAN	38 kDa	0.34644	0.31127	0	0.219237	0	0	0	0	0.6021	0.91949	0.7911	0.770897	0	0	0.26898	0.08966	1.8383	0	0	0.612767	0.59282	0	0.42186	0.338227
U3 small nucleolar RNA-associated protein 14 homolog A OS=Homo sapiens GN=UTP14A PE=1 SV=1	UT14A_HUMAN	88 kDa	1.1661	0	0.72614	0.630747	1.0586	0	1.5599	0.872833	0	0.613	0	0.204333	0	0	1.2228	0.4076	0	0	0.48762	0.16254	0	0	0	0
Eukaryotic translation initiation factor 2 subunit 3 OS=Homo sapiens GN=EIF2S3 PE=1 SV=3	IF2G_HUMAN	51 kDa	0.40008	0	0	0.13336	0	0	0	0	0	0	0	0	0	0	0	0	1.1057	0.5113	0	0.539	2.0249	1.5206	0.84372	1.46307
Glutathione S-transferase omega-1 OS=Homo sapiens GN=GSTO1 PE=1 SV=2	GSTO1_HUMAN	28 kDa	0	0	0	0	0	0	0	0	0	5.3908	0	1.79693	0	2.6631	0	0.8877	0	0	4.0974	1.3658	0	2.3007	0	0.7669
Proline-, glutamic acid- and leucine-rich protein 1 OS=Homo sapiens GN=PELP1 PE=1 SV=2	PELP1_HUMAN	120 kDa	0	0	0.66441	0.22147	1.8021	0	1.5599	1.12067	0	0	0.2637	0.0879	0	0.3155	0.64941	0.321637	0	0	0	0	0	0	0	0
ERO1-like protein alpha OS=Homo sapiens GN=ERO1A PE=1 SV=2	ERO1A_HUMAN	54 kDa	0	2.9729	3.2309	2.06793	0	0	1.8147	0.6049	0	0	0	0	0	0	0	0	0	0	0	0	0	2.2788	0	0.7596
Methyl-CpG-binding protein 2 OS=Homo sapiens GN=MECP2 PE=1 SV=1	MECP2_HUMAN	52 kDa	0	4.3457	0	1.44857	1.4725	0	0	0.490833	0	0	0	0	9.1285	0	0	3.04283	8.5601	5.6926	2.111	5.45457	3.141	0	1.7644	1.63513
Ubiquitin carboxyl-terminal hydrolase 36 OS=Homo sapiens GN=USP36 PE=1 SV=3	UBP36_HUMAN	123 kDa	0	0	0	0	2.9381	2.0856	2.7221	2.58193	0.33979	0	0.33049	0.223427	0.33678	0.3155	0.3247	0.32566	0	0	0	0	0	0	0	0
DNA-directed RNA polymerase I subunit RPA1 OS=Homo sapiens GN=POLR1A PE=1 SV=2	RPA1_HUMAN	195 kDa	0	0	0	0	8.8173	1.7148	0	3.5107	0	0	1.6348	0.544933	3.0503	0.6836	0	1.24463	0	0	0	0	0	0	0	0
Bystin OS=Homo sapiens GN=BYSL PE=1 SV=3	BYST_HUMAN	50 kDa	0	0	0.30134	0.100447	0.36953	1.1123	0.68531	0.72238	0.33979	0	0.59419	0.311327	0.97589	0.631	0	0.53563	0	0	0	0	0	0	0	0
Protein polybromo-1 OS=Homo sapiens GN=PBRM1 PE=1 SV=1	PB1_HUMAN	193 kDa	0	0	0	0	0	0	0.90736	0.302453	0.87328	0	1.6348	0.836027	1.5251	1.3672	2.7038	1.86537	0	0	0	0	2.0194	0	0	0.673133
Chromatin target of PRMT1 protein OS=Homo sapiens GN=CHTOP PE=1 SV=2	CHTOP_HUMAN	26 kDa	1.2003	0.93382	0	0.711373	0	0	1.0753	0.358433	0.98063	0.68255	0	0.554393	0	0.3155	0	0.105167	0	0	0	0	0	0	0	0
39S ribosomal protein L16, mitochondrial OS=Homo sapiens GN=MRPL16 PE=1 SV=1	RM16_HUMAN	28 kDa	0.40008	0.31127	1.2524	0.654583	1.4691	0.85742	0.38997	0.905497	1.3592	0	0.81738	0.725527	0	0	0	0	0	0	0.71563	0.238543	1.0097	0	0	0.336567
U1 small nuclear ribonucleoprotein 70 kDa OS=Homo sapiens GN=SNRNP70 PE=1 SV=2	RU17_HUMAN	52 kDa	0	0	0	0	3.6796	0.85742	6.3459	3.62764	0	0	0	0	0	0	0	0	0	0	11.504	3.83467	0	0	0	0
Cell cycle progression protein 1 OS=Homo sapiens GN=CCPG1 PE=1 SV=3	CCPG1_HUMAN	87 kDa	0.40008	1.2451	1.0892	0.91146	0	0	0	0	0.30105	0.34128	0.59419	0.412173	0	0	0	0	0	0.5113	0.48762	0.332973	0	0	0	0
DNA damage-binding protein 1 OS=Homo sapiens GN=DDB1 PE=1 SV=1	DDB1_HUMAN	127 kDa	0	0	2.2012	0.733733	0	0.37076	1.5599	0.643553	0.33979	0	0	0.113263	0	0	0.64941	0.21647	0	0	0	0	0	0	0	0
Pyruvate dehydrogenase E1 component subunit beta, mitochondrial OS=Homo sapiens GN=PDHB PE=1 SV=3	ODPB_HUMAN	39 kDa	0	0.31723	0	0.105743	0	0	0.29534	0.0984467	1.6215	0.95427	0.5274	1.03439	0.30233	0.30434	0	0.202223	0	0	0	0	0	0	0	0
Rho GTPase-activating protein 1 OS=Homo sapiens GN=ARHGAP1 PE=1 SV=1	RHG01_HUMAN	50 kDa	0.40008	0.93382	1.4523	0.928733	0	0	0	0	0	0	0	0	0	0	0.26898	0.08966	1.8383	0.5113	0	0.7832	0	0.76689	0	0.25563
Transcription initiation factor TFIID subunit 4 OS=Homo sapiens GN=TAF4 PE=1 SV=2	TAF4_HUMAN	110 kDa	0	0	4.4481	1.4827	0	0	4.7595	1.5865	0	0	0	0	5.3908	0	0	1.79693	0.91913	0	0	0.306377	0	3.4066	0	1.13553
Exportin-1 OS=Homo sapiens GN=XPO1 PE=1 SV=1	XPO1_HUMAN	123 kDa	0.34644	0.62255	2.8678	1.27893	0	0	0.38997	0.12999	0	0	0	0	0	0	0	0	0	1.0226	0.97523	0.665943	0	0.38344	0	0.127813
Synaptogyrin-2 OS=Homo sapiens GN=SYNGR2 PE=1 SV=1	SNG2_HUMAN	25 kDa	0	0.31723	0.60268	0.306637	0.32403	0.33049	0.29534	0.31662	0.6021	0	0.5274	0.3765	0.60467	0.60869	0	0.404453	0	0	0	0	0	0	0	0
28S ribosomal protein S5, mitochondrial OS=Homo sapiens GN=MRPS5 PE=1 SV=2	RT05_HUMAN	48 kDa	0	2.1912	0.62618	0.939127	0	0	0.90736	0.302453	0	0	0	0	0	0	0	0	0	9.2276	0	3.07587	0	2.2788	4.1215	2.13343
Transcription elongation factor SPT5 OS=Homo sapiens GN=SUPT5H PE=1 SV=1	SPT5H_HUMAN	121 kDa	0	0	0	0	1.4691	1.7148	2.7221	1.96867	0.87328	0.94363	0.81738	0.878097	1.5251	0.6836	0	0.736233	0	0	0	0	0	0	0	0
Importin-4 OS=Homo sapiens GN=IPO4 PE=1 SV=2	IPO4_HUMAN	119 kDa	0	0	1.112	0.370667	0	0.33049	0.29534	0.20861	0.6021	0	0.2637	0.2886	0	0	0	0	0	0.76745	1.9387	0.90205	0	1.4966	0	0.498867
SEC23-interacting protein OS=Homo sapiens GN=SEC23IP PE=1 SV=1	S23IP_HUMAN	111 kDa	0	0	0	0	0	0	0	0	0	0	0	0	0	0	0	0	0	0	7.7927	2.59757	3.029	1.5192	1.6288	2.059
Lysine-specific demethylase 4B OS=Homo sapiens GN=KDM4B PE=1 SV=4	KDM4B_HUMAN	122 kDa	0	0.31127	0	0.103757	0	1.7148	0	0.5716	0	0	0	0	0	0	0	0	1.8383	2.3012	3.5782	2.57257	0	0	1.2363	0.4121
ATP-dependent zinc metalloprotease YME1L1 OS=Homo sapiens GN=YME1L1 PE=1 SV=2	YMEL1_HUMAN	86 kDa	0.34644	0	0	0.11548	0	0	1.2027	0.4009	0	0.34128	0.5274	0.28956	0.30233	0.61984	1.0759	0.666023	0	0	0	0	0	0	0	0
DNA (cytosine-5)-methyltransferase 1 OS=Homo sapiens GN=DNMT1 PE=1 SV=2	DNMT1_HUMAN	183 kDa	0.34644	0	1.112	0.486147	4.4106	2.5723	0.90736	2.63009	0	0	0	0	2.5595	0	0	0.853167	0	0	0	0	0	0	0	0
Epithelial discoidin domain-containing receptor 1 OS=Homo sapiens GN=DDR1 PE=1 SV=1	DDR1_HUMAN	101 kDa	1.1661	0.8872	1.2524	1.1019	2.2036	0	0	0.734533	0	0	1.6348	0.544933	0.76257	1.3672	0	0.709923	0	0	0	0	0	1.1355	0	0.3785
DnaJ homolog subfamily B member 11 OS=Homo sapiens GN=DNAJB11 PE=1 SV=1	DJB11_HUMAN	41 kDa	0	0	0	0	0	0	0	0	1.2131	0	0	0.404367	0	0	0	0	2.7642	1.0226	1.4628	1.74987	0	0	0.42186	0.14062
EH domain-containing protein 1 OS=Homo sapiens GN=EHD1 PE=1 SV=2	EHD1_HUMAN	61 kDa	0	0	1.0892	0.363067	0	0.37076	0	0.123587	0	0	0	0	0	0	0	0	0.55285	0.5113	0.48762	0.517257	1.6199	0.38344	0.42186	0.8084
Leucine-rich repeat-containing protein 1 OS=Homo sapiens GN=LRRC1 PE=1 SV=1	LRRC1_HUMAN	59 kDa	0	0	0.36307	0.121023	0.73906	0.37076	0	0.36994	0.30105	0	0.33049	0.210513	0.33678	0.631	0.64941	0.539063	0	0	0	0	0.80995	0	0	0.269983
Puromycin-sensitive aminopeptidase OS=Homo sapiens GN=NPEPPS PE=1 SV=2	PSA_HUMAN	103 kDa	0	1.7744	1.2524	1.00893	0	0	0	0	0	0	0	0	0	0	0	0	0	0.76708	0	0.255693	0	6.0768	0	2.0256
Melanoma inhibitory activity protein 3 OS=Homo sapiens GN=MIA3 PE=1 SV=1	MIA3_HUMAN	214 kDa	0	0	0	0	1.4725	0	0.38997	0.620823	0	0.34128	0.2637	0.20166	0	0.631	0.64941	0.426803	0	1.2784	0	0.426133	1.0097	1.1355	0.41835	0.854517
Major vault protein OS=Homo sapiens GN=MVP PE=1 SV=4	MVP_HUMAN	99 kDa	0.80017	1.7744	4.5884	2.38766	0	0	0	0	0.33979	0	0	0.113263	0	0	0	0	0	0	1.4313	0.4771	0	1.1355	0	0.3785
26S proteasome non-ATPase regulatory subunit 1 OS=Homo sapiens GN=PSMD1 PE=1 SV=2	PSMD1_HUMAN	106 kDa	0.40008	0.31127	1.0892	0.600183	0	0	0	0	0.94189	0	0	0.313963	0	0	0	0	0	0	1.8506	0.616867	0	0	0	0
Ubiquitin carboxyl-terminal hydrolase 7 OS=Homo sapiens GN=USP7 PE=1 SV=2	UBP7_HUMAN	128 kDa	0	0.8872	2.5047	1.13063	0.73453	0.85742	1.8147	1.13555	0	0	0	0	0	0	0	0	0	0	0	0	1.0097	2.2788	0	1.09617
Probable ATP-dependent RNA helicase DDX27 OS=Homo sapiens GN=DDX27 PE=1 SV=2	DDX27_HUMAN	90 kDa	0.34644	0	0	0.11548	0.97209	0.66098	0.59068	0.74125	0	0.3065	0	0.102167	0.30233	0.30434	0	0.202223	0	0	0.38774	0.129247	0	0	0	0
Activity-dependent neuroprotector homeobox protein OS=Homo sapiens GN=ADNP PE=1 SV=1	ADNP_HUMAN	124 kDa	0	0	0	0	2.9381	1.7148	0	1.55097	0	0	0	0	3.0503	1.3672	0	1.4725	0	0	0	0	0	0	0	0
Dehydrogenase/reductase SDR family member 1 OS=Homo sapiens GN=DHRS1 PE=1 SV=1	DHRS1_HUMAN	34 kDa	0	0	0.36307	0.121023	0.73906	0.33049	0	0.356517	0	0	0	0	0	0	0	0	0.49458	0	0	0.16486	0.80995	0.76689	1.2586	0.945147
ER membrane protein complex subunit 2 OS=Homo sapiens GN=EMC2 PE=1 SV=1	EMC2_HUMAN	35 kDa	0	0.31723	0.30134	0.20619	0.32403	0	0.59068	0.304903	0	0.3065	0	0.102167	0.30233	0.60869	0.26898	0.393333	0	0.38373	0.38774	0.257157	0	0	0	0
NADH dehydrogenase [ubiquinone] iron-sulfur protein 7, mitochondrial OS=Homo sapiens GN=NDUFS7 PE=1 SV=3	NDUS7_HUMAN	24 kDa	0	0	0	0	0.32403	0.85742	0.90736	0.69627	0	0.3065	0	0.102167	0.30233	0	0.53796	0.280097	0	0.38373	0	0.12791	0.40497	0.74046	0.42186	0.52243
Ufm1-specific protease 2 OS=Homo sapiens GN=UFSP2 PE=1 SV=3	UFSP2_HUMAN	53 kDa	0.40008	0	0.62618	0.342087	0	0.37076	0.90736	0.42604	0	0	0.33049	0.110163	0.67355	0.3155	0.3247	0.437917	0	0	0.48762	0.16254	1.4146	0	0	0.471533
UDP-glucuronic acid decarboxylase 1 OS=Homo sapiens GN=UXS1 PE=1 SV=1	UXS1_HUMAN	48 kDa	0	0	0.36307	0.121023	0	0.66098	0	0.220327	0.30105	0.613	0.2637	0.392583	0.60467	0.30434	0.53796	0.482323	0	0	0	0	0	0	0	0
DBIRD complex subunit ZNF326 OS=Homo sapiens GN=ZNF326 PE=1 SV=2	ZN326_HUMAN	66 kDa	0	0	2.8502	0.950067	2.9416	0	4.7595	2.56703	0	0	0	0	1.5251	0	0	0.508367	0	0	0.48762	0.16254	0	0	0	0
Apoptotic chromatin condensation inducer in the nucleus OS=Homo sapiens GN=ACIN1 PE=1 SV=2	ACINU_HUMAN	152 kDa	1.1661	0	1.0892	0.751767	4.4106	0.85742	0	1.75601	0	0	0	0	0	0	0	0	0	0	0.71563	0.238543	0	0.7596	0	0.2532
Ras GTPase-activating protein-binding protein 1 OS=Homo sapiens GN=G3BP1 PE=1 SV=1	G3BP1_HUMAN	52 kDa	0	0	6.6761	2.22537	0	0	10.409	3.46967	0	0	0	0	0	0	0	0	0	0	0	0	0	2.271	0	0.757
Transcription factor 20 OS=Homo sapiens GN=TCF20 PE=1 SV=3	TCF20_HUMAN	212 kDa	0	0	0	0	2.945	0	0.77994	1.24165	0.33979	0	0.33049	0.223427	0	0	0.64941	0.21647	0	0	0	0	0.80995	0	1.6288	0.812917
Ephrin type-A receptor 2 OS=Homo sapiens GN=EPHA2 PE=1 SV=2	EPHA2_HUMAN	108 kDa	0	0.31127	1.0892	0.466823	0	0.37076	0	0.123587	0	0.68255	0.33049	0.33768	0.33678	0	0	0.11226	1.1057	0	0	0.368567	0	0	0	0
UMP-CMP kinase OS=Homo sapiens GN=CMPK1 PE=1 SV=3	KCY_HUMAN	22 kDa	0	0.31127	0.72614	0.345803	0	0	0.38997	0.12999	0	0	0.66098	0.220327	0	0	0	0	0	0	0	0	0	1.904	0	0.634667
UTP--glucose-1-phosphate uridylyltransferase OS=Homo sapiens GN=UGP2 PE=1 SV=5	UGPA_HUMAN	57 kDa	0	0.62255	0.36307	0.32854	0	0	0	0	0	0	0	0	0	0	0	0	0	0	2.131	0.710333	0	3.8048	0	1.26827
Phosphoserine aminotransferase OS=Homo sapiens GN=PSAT1 PE=1 SV=2	SERC_HUMAN	40 kDa	1.5662	0.31127	0	0.625823	0	0	0	0	0	0.3065	0	0.102167	0	0	0	0	0	1.1508	1.1632	0.771333	0	0.76689	0	0.25563
Isoleucine--tRNA ligase, mitochondrial OS=Homo sapiens GN=IARS2 PE=1 SV=2	SYIM_HUMAN	114 kDa	1.1661	0	2.6047	1.25693	0	0	0.90736	0.302453	0	0	0	0	0	0	0	0	0	0	0	0	0	3.0384	0	1.0128
Growth/differentiation factor 15 OS=Homo sapiens GN=GDF15 PE=2 SV=3	GDF15_HUMAN	34 kDa	0	0	2.224	0.741333	0	0	0	0	0	0	0.2637	0.0879	0	0	0	0	0	6.3767	0.77548	2.38406	0	0	0	0
Eukaryotic translation initiation factor 3 subunit B OS=Homo sapiens GN=EIF3B PE=1 SV=3	EIF3B_HUMAN	92 kDa	0	2.1728	5.1742	2.449	0	0	1.9765	0.658833	0	0.34128	0.33049	0.223923	0	0	0	0	0	0	0	0	0	0	0	0
Aspartate aminotransferase, mitochondrial OS=Homo sapiens GN=GOT2 PE=1 SV=3	AATM_HUMAN	48 kDa	0	0	0	0	0	0	0	0	0	0	0	0	0	0	0	0	0	0.5113	0.87535	0.462217	0	1.8512	0.84372	0.898307
Probable ATP-dependent RNA helicase DDX10 OS=Homo sapiens GN=DDX10 PE=1 SV=2	DDX10_HUMAN	101 kDa	0.34644	0	0	0.11548	2.8516	0	1.8147	1.55543	0.30105	0	0	0.10035	0	0.3155	0	0.105167	0	0	0	0	0	0	0	0
Integrin alpha-6 OS=Homo sapiens GN=ITGA6 PE=1 SV=5	ITA6_HUMAN	127 kDa	0	0.8872	1.2524	0.7132	0	0.85742	0.29534	0.384253	0.6021	0.3065	0.2637	0.390767	0	0	0	0	0	0	0	0	1.0097	0	0	0.336567
RNA-binding protein PNO1 OS=Homo sapiens GN=PNO1 PE=1 SV=1	PNO1_HUMAN	28 kDa	0.80017	0.62255	0.62618	0.682967	0.73906	0.37076	0	0.36994	0.30105	0	0	0.10035	0.33678	0	0	0.11226	0	0	0	0	0	0	0	0
Pyruvate carboxylase, mitochondrial OS=Homo sapiens GN=PC PE=1 SV=2	PYC_HUMAN	130 kDa	0	0.8872	0	0.295733	0	0	0	0	1.6602	0	0.2637	0.6413	0	0	0	0	0	0.5113	0.38774	0.29968	0	0	0	0
Complex I assembly factor TIMMDC1, mitochondrial OS=Homo sapiens GN=TIMMDC1 PE=1 SV=2	TIDC1_HUMAN	32 kDa	0	0	0	0	0	0	0.38997	0.12999	0	0	0.66098	0.220327	0	0.3155	0	0.105167	0	0	0	0	0.80995	0.76689	0.84372	0.806853
Solute carrier family 12 member 9 OS=Homo sapiens GN=SLC12A9 PE=1 SV=1	S12A9_HUMAN	96 kDa	0	0	0	0	0	0	0	0	0.6021	1.5325	0	0.711533	0.30233	0.30434	0.26898	0.291883	0	0	0	0	0	0	0	0
ATP-binding cassette sub-family B member 7, mitochondrial OS=Homo sapiens GN=ABCB7 PE=1 SV=2	ABCB7_HUMAN	83 kDa	0	0	0	0	0	0	0.38997	0.12999	0.67958	0	0	0.226527	1.0103	0.94649	0.3247	0.760497	0	0	0	0	0	0	0	0
Coiled-coil domain-containing protein 25 OS=Homo sapiens GN=CCDC25 PE=1 SV=2	CCD25_HUMAN	24 kDa	0	0	0	0	0.32403	0.99147	0.29534	0.536947	0	0	0.5274	0.1758	0	0	0	0	1.4837	0	0	0.494567	0	0	0	0
Leucine--tRNA ligase, cytoplasmic OS=Homo sapiens GN=LARS PE=1 SV=2	SYLC_HUMAN	134 kDa	0.34644	0.31127	1.4523	0.703337	0	0	0.77994	0.25998	0	0	0	0	0	0	0	0	0.55285	0	0	0.184283	0	0	0.42186	0.14062
Nucleolar protein 7 OS=Homo sapiens GN=NOL7 PE=1 SV=2	NOL7_HUMAN	29 kDa	0.34644	0.63447	0.30134	0.427417	0	0	0	0	0.90315	0	0	0.30105	0	0	0.26898	0.08966	0	0	0.38774	0.129247	0	0	0.41835	0.13945
Platelet glycoprotein 4 OS=Homo sapiens GN=CD36 PE=1 SV=2	CD36_HUMAN	53 kDa	0.34644	2.4901	0.62618	1.15424	0	0.33049	4.059	1.46316	0	0	0	0	0	0	0	0	0	0	0	0	0	0	0	0
Neuroblast differentiation-associated protein AHNAK OS=Homo sapiens GN=AHNAK PE=1 SV=2	AHNK_HUMAN	629 kDa	1.1661	0	0.72614	0.630747	2.9381	0	0	0.979367	0	0	0	0	2.2877	0.30434	0	0.864013	0	0	0	0	0	0	0	0
1-acyl-sn-glycerol-3-phosphate acyltransferase gamma OS=Homo sapiens GN=AGPAT3 PE=1 SV=1	PLCC_HUMAN	43 kDa	0	0	0	0	0	0.37076	0.38997	0.253577	0	0.68255	0.66098	0.447843	0.67355	0.631	0	0.43485	0	0	0	0	0	0	0	0
Solute carrier family 35 member F6 OS=Homo sapiens GN=SLC35F6 PE=1 SV=1	S35F6_HUMAN	40 kDa	0.34644	0	0	0.11548	0	0.66098	0.59068	0.41722	0	0	0.2637	0.0879	0.907	0	0	0.302333	0	0	0.38774	0.129247	0	0	0	0
Brefeldin A-inhibited guanine nucleotide-exchange protein 2 OS=Homo sapiens GN=ARFGEF2 PE=1 SV=3	BIG2_HUMAN	202 kDa	0	0	0	0	0.36953	0	0	0.123177	0	0	0.33049	0.110163	0	0	0	0	0	3.38	1.4313	1.60377	0	2.2788	0	0.7596
Alpha-2-macroglobulin OS=Homo sapiens GN=A2M PE=1 SV=3	A2MG_HUMAN	163 kDa	0	0	1.2524	0.417467	0	0	0	0	0	0.34128	0	0.11376	0	0	0	0	2.2114	0	1.6909	1.30077	0	0	0	0
ATP-dependent RNA helicase DDX50 OS=Homo sapiens GN=DDX50 PE=1 SV=1	DDX50_HUMAN	83 kDa	0	0	0	0	0	0.85742	1.7721	0.876507	0	0	0	0	4.562	0	0	1.52067	0.91913	0	0	0.306377	0	0	0	0
Tyrosine--tRNA ligase, cytoplasmic OS=Homo sapiens GN=YARS PE=1 SV=4	SYYC_HUMAN	59 kDa	0	0	0	0	0	0	0	0	0	0.3065	0.2637	0.190067	0	1.6861	0	0.562033	0.49458	2.3014	0	0.931993	0	0.38344	0	0.127813
Heat shock 70 kDa protein 4 OS=Homo sapiens GN=HSPA4 PE=1 SV=4	HSP74_HUMAN	94 kDa	0	0	1.855	0.618333	0	0	0	0	0	0	0	0	0	0	0	0	0	0	0.38774	0.129247	0	4.1299	0	1.37663
Fibronectin OS=Homo sapiens GN=FN1 PE=1 SV=4	FINC_HUMAN	263 kDa	0	0	0	0	0	0	0	0	0	0	0	0	0	0	0	0	0	0	0.97523	0.325077	1.6199	0.76689	0.42186	0.936217
C4b-binding protein alpha chain OS=Homo sapiens GN=C4BPA PE=1 SV=2	C4BPA_HUMAN	67 kDa	0	0.8872	1.8785	0.9219	0	0	0	0	0	0.34128	1.6348	0.658693	0.76257	0	0.6848	0.482457	0	0	0	0	0	0	0	0
High affinity copper uptake protein 1 OS=Homo sapiens GN=SLC31A1 PE=1 SV=1	COPT1_HUMAN	21 kDa	0.80017	1.2451	0.72614	0.923803	0	0	0	0	0	0	0	0	0	0	0	0	0	0	0.48762	0.16254	0	0	0	0
Protein scribble homolog OS=Homo sapiens GN=SCRIB PE=1 SV=4	SCRIB_HUMAN	175 kDa	0	0	0	0	1.1086	0.37076	0	0.49312	0	0.34128	0	0.11376	0.30233	0	1.2785	0.526943	0	0	0	0	0	0	0	0
Mitochondrial import inner membrane translocase subunit Tim13 OS=Homo sapiens GN=TIMM13 PE=1 SV=1	TIM13_HUMAN	11 kDa	0	0	0	0	0	0	0	0	0	0	0.7911	0.2637	0	0	1.0759	0.358633	0	0	0	0	0.59282	0	0.41835	0.337057
Lipoma-preferred partner OS=Homo sapiens GN=LPP PE=1 SV=1	LPP_HUMAN	66 kDa	0	4.3457	7.2983	3.88133	0	0	0	0	0	0	0	0	0	0	0	0	0	0	0	0	0	0	0	0
GTP:AMP phosphotransferase AK3, mitochondrial OS=Homo sapiens GN=AK3 PE=1 SV=4	KAD3_HUMAN	26 kDa	0	0	0	0	0	0	0.38997	0.12999	0.33979	0.3065	0	0.21543	0	0	0	0	0	0	0	0	0	1.9172	0	0.639067
Apolipoprotein B-100 OS=Homo sapiens GN=APOB PE=1 SV=2	APOB_HUMAN	516 kDa	0	0	1.112	0.370667	0	0	0	0	0	0	3.273	1.091	0	0	0	0	0	0	0	0	1.8196	1.1503	0	0.989967
Actin-related protein 3 OS=Homo sapiens GN=ACTR3 PE=1 SV=3	ARP3_HUMAN	47 kDa	1.6003	0.31127	0	0.63719	0	0	0	0	0	0	0	0	0	0	0	0	0	0.5113	0.97523	0.49551	0	0	0	0
Casein kinase II subunit alpha' OS=Homo sapiens GN=CSNK2A2 PE=1 SV=1	CSK22_HUMAN	41 kDa	0	0	3.336	1.112	0	0	0	0	0	0.34128	0	0.11376	0	0	0	0	0	1.8459	3.2868	1.7109	0	1.1355	0	0.3785
Lysine-rich nucleolar protein 1 OS=Homo sapiens GN=KNOP1 PE=1 SV=1	KNOP1_HUMAN	52 kDa	0	0	0	0	0	1.9572	0	0.6524	0	0	0	0	8.4336	0	3.3576	3.9304	0	0	0	0	3.9947	0	0	1.33157
Nucleobindin-2 OS=Homo sapiens GN=NUCB2 PE=1 SV=2	NUCB2_HUMAN	50 kDa	0	0	0	0	0	0	0	0	0	0	0	0	0	0	0	0	2.7574	0	0	0.919133	0	0	3.2869	1.09563
Nucleoporin p58/p45 OS=Homo sapiens GN=NUP58 PE=1 SV=1	NUP58_HUMAN	61 kDa	0	0	0	0	0	0.37076	0	0.123587	0.67958	0	0	0.226527	0.67355	0.3155	0	0.329683	0	0	0	0	0.80995	0	0	0.269983
Nuclear envelope pore membrane protein POM 121 OS=Homo sapiens GN=POM121 PE=1 SV=2	P121A_HUMAN	128 kDa	0	2.1728	8.6074	3.5934	12.488	0	0	4.16267	0	0	0	0	1.7969	0	0	0.598967	0	0	2.111	0.703667	0	0	0	0
PH-interacting protein OS=Homo sapiens GN=PHIP PE=1 SV=2	PHIP_HUMAN	207 kDa	0	0	5.564	1.85467	0	0	6.9396	2.3132	0	0	0	0	0	0	0	0	0	0	0	0	0	1.4966	0	0.498867
Ran-specific GTPase-activating protein OS=Homo sapiens GN=RANBP1 PE=1 SV=1	RANG_HUMAN	23 kDa	2.3322	0	1.2524	1.19487	0	0	0	0	0	0.613	0.2637	0.292233	0	0	0	0	0	0	0.38774	0.129247	0	0	0	0
Protein AATF OS=Homo sapiens GN=AATF PE=1 SV=1	AATF_HUMAN	63 kDa	0	0	0	0	0.36953	3.1537	0	1.17441	0.30105	0	3.273	1.19135	0.30233	0	0	0.100777	0	0	0.97523	0.325077	3.141	0	0	1.047
Nectin-2 OS=Homo sapiens GN=NECTIN2 PE=1 SV=1	NECT2_HUMAN	58 kDa	0.40008	0.31127	0	0.237117	0	0	0.38997	0.12999	0	0	0	0	0.33678	0	1.1874	0.50806	0	0	0	0	0	0	0	0
Nurim OS=Homo sapiens GN=NRM PE=1 SV=1	NRM_HUMAN	29 kDa	0	2.1728	0	0.724267	0	1.1123	0	0.370767	0	0.68255	0	0.227517	0	0.3155	0.3247	0.2134	0	0	0	0	0	0	0	0
Septin-2 OS=Homo sapiens GN=SEPT2 PE=1 SV=1	SEPT2_HUMAN	41 kDa	0	0	0	0	0	0	0	0	0	0	0	0	0	0	0	0	0	1.0226	0.97523	0.665943	0	1.1503	1.7644	0.971567
Bifunctional coenzyme A synthase OS=Homo sapiens GN=COASY PE=1 SV=4	COASY_HUMAN	62 kDa	0	1.7744	0	0.591467	0	0	0	0	0.87328	0	0	0.291093	0	0	0	0	1.8383	1.5342	0.71563	1.36271	0	0	0	0
Mitofusin-2 OS=Homo sapiens GN=MFN2 PE=1 SV=3	MFN2_HUMAN	86 kDa	0.34644	0	0.30134	0.215927	0.36953	0.74152	0.38997	0.50034	0	0	0	0	0	0.3155	1.0095	0.441667	0	0	0	0	0	0	0	0
ATP-binding cassette sub-family D member 1 OS=Homo sapiens GN=ABCD1 PE=1 SV=2	ABCD1_HUMAN	83 kDa	0	0	0.30134	0.100447	0	0	0	0	0	0.3065	0.5274	0.277967	0.30233	0	0.59368	0.29867	0	0.38373	0	0.12791	0	0	0	0
Signal recognition particle subunit SRP72 OS=Homo sapiens GN=SRP72 PE=1 SV=3	SRP72_HUMAN	75 kDa	0.80017	0.31127	0	0.37048	0	0	0	0	0	0.34128	0	0.11376	0	0	0	0	1.1057	0	0	0.368567	0	0.76689	0	0.25563
2-oxoglutarate dehydrogenase, mitochondrial OS=Homo sapiens GN=OGDH PE=1 SV=3	ODO1_HUMAN	116 kDa	0	0	0	0	0.73453	0	4.3771	1.70388	0	0.613	0	0.204333	0.30233	0	0	0.100777	0	0	1.6434	0.5478	0	0	0	0
Acyl-CoA synthetase short-chain family member 3, mitochondrial OS=Homo sapiens GN=ACSS3 PE=1 SV=1	ACSS3_HUMAN	75 kDa	1.2003	0.31127	0	0.503857	0.36953	0.37076	0	0.246763	0	0	0	0	0	0	0	0	0	0	0	0	0	0	0.42186	0.14062
Cytochrome c oxidase assembly protein COX15 homolog OS=Homo sapiens GN=COX15 PE=1 SV=1	COX15_HUMAN	46 kDa	0	0	0	0	0	0	0	0	0	1.2849	0	0.4283	1.0103	0.3155	0.3247	0.550167	0	0	0	0	0	0	0	0
Microtubule-associated protein 4 OS=Homo sapiens GN=MAP4 PE=1 SV=3	MAP4_HUMAN	121 kDa	0	0	0	0	0	0	0	0	0	0	0	0	0	0	0	0	0	0	0	0	3.9947	1.1355	1.6804	2.2702
Ethanolamine-phosphate cytidylyltransferase OS=Homo sapiens GN=PCYT2 PE=1 SV=1	PCY2_HUMAN	44 kDa	0	6.5185	2.224	2.91417	1.4725	0	0	0.490833	0	0	1.9116	0.6372	0	0	0	0	0	0	0	0	0	0	0	0
Sister chromatid cohesion protein PDS5 homolog A OS=Homo sapiens GN=PDS5A PE=1 SV=1	PDS5A_HUMAN	151 kDa	0	0	1.6154	0.538467	3.3076	2.4564	1.8147	2.52623	1.2131	2.8309	2.4521	2.16537	3.0503	2.7344	1.6943	2.493	0	0.76708	1.9189	0.895327	1.0097	0.7596	0	0.589767
SAP domain-containing ribonucleoprotein OS=Homo sapiens GN=SARNP PE=1 SV=3	SARNP_HUMAN	24 kDa	0.40008	0	0	0.13336	0	0.66098	0.29534	0.318773	0	0	0	0	0	0	0	0	0	0	0.77548	0.258493	0	0	0.41835	0.13945
GDP-mannose 4,6 dehydratase OS=Homo sapiens GN=GMDS PE=1 SV=1	GMDS_HUMAN	42 kDa	0	0	0	0	0	0	0	0	0.67958	0.68255	0.66098	0.67437	0	0	0	0	0	0	0	0	0	0	0	0
Paraplegin OS=Homo sapiens GN=SPG7 PE=1 SV=2	SPG7_HUMAN	88 kDa	0	0	0.62618	0.208727	0	0	0.90736	0.302453	0	0	0.33049	0.110163	0	0	0.64941	0.21647	0	0	0	0	0	1.5192	0	0.5064
Probable ATP-dependent RNA helicase DDX56 OS=Homo sapiens GN=DDX56 PE=1 SV=1	DDX56_HUMAN	62 kDa	0	0	0	0	0	0	0.77994	0.25998	0.33979	0	0	0.113263	0	0.631	0.64941	0.426803	0	0	0	0	0	0	0	0
RNA 3'-terminal phosphate cyclase-like protein OS=Homo sapiens GN=RCL1 PE=1 SV=3	RCL1_HUMAN	41 kDa	0	0.31127	0.36307	0.22478	0	0.37076	0.77994	0.383567	0.30105	0.3065	0	0.202517	0	0	0	0	0	0	0	0	0	0	0	0
Treacle protein OS=Homo sapiens GN=TCOF1 PE=1 SV=3	TCOF_HUMAN	152 kDa	0	0	0	0	0	0	0.29534	0.0984467	0.30105	0.3065	0.33049	0.31268	3.0428	0	0.53796	1.19359	0	0	0	0	0	0	0	0
MARCKS-related protein OS=Homo sapiens GN=MARCKSL1 PE=1 SV=2	MRP_HUMAN	20 kDa	0	0	0	0	0	0	0	0	0	0	0	0	0.30233	0	0	0.100777	0	0	0.77548	0.258493	0	0.74046	0.8367	0.52572
26S proteasome non-ATPase regulatory subunit 13 OS=Homo sapiens GN=PSMD13 PE=1 SV=2	PSD13_HUMAN	43 kDa	0	0.31127	0	0.103757	0	0	0	0	0	0	0	0	0	0	0	0	0.55285	1.0226	0	0.52515	0	1.1371	0	0.379033
Ubiquitin-like modifier-activating enzyme 6 OS=Homo sapiens GN=UBA6 PE=1 SV=1	UBA6_HUMAN	118 kDa	0	0	5.564	1.85467	0	0	5.2047	1.7349	0	0	0	0	0	0	0	0	0	0	0	0	0	1.1355	0	0.3785
Epiplakin OS=Homo sapiens GN=EPPK1 PE=1 SV=2	EPIPL_HUMAN	556 kDa	0	0	0	0	0	0	0	0	0	1.9085	0	0.636167	0	0	0	0	0	0	0	0	0	1.4966	0	0.498867
60S ribosomal protein L38 OS=Homo sapiens GN=RPL38 PE=1 SV=2	RL38_HUMAN	8 kDa	0	0.31127	1.4523	0.587857	0	0	0	0	0	0	0	0	0	0	0.3247	0.108233	0	0	0	0	0	0	0.42186	0.14062
E3 ubiquitin-protein ligase HERC2 OS=Homo sapiens GN=HERC2 PE=1 SV=2	HERC2_HUMAN	527 kDa	0	0	0	0	0.32403	0	0	0.10801	0	0	0	0	0	0	0	0	1.8383	0.76708	0	0.86846	0	11.009	0	3.66967
Envelope glycoprotein gp160 OS=Human immunodeficiency virus type 1 group M subtype A (isolate Z321) GN=env PE=3 SV=1	sp|P05881|ENV_HV1ZH	?	0	0	0.62618	0.208727	0.36953	0	0	0.123177	0	1.8873	3.2695	1.71893	0	0	0	0	0.91913	0	0	0.306377	0	0	0	0
Nuclear transport factor 2 OS=Homo sapiens GN=NUTF2 PE=1 SV=1	NTF2_HUMAN	14 kDa	0	0	0	0	0	0	0	0	0	0	0	0	0	0	0	0	0	0	0.97523	0.325077	0	1.5338	0	0.511267
Ankycorbin OS=Homo sapiens GN=RAI14 PE=1 SV=2	RAI14_HUMAN	110 kDa	0	0.8872	1.2524	0.7132	1.4725	0	1.8147	1.09573	0	0	0	0	0	0	0	0	0	0	0	0	0	0	0	0
Transmembrane emp24 domain-containing protein 3 OS=Homo sapiens GN=TMED3 PE=1 SV=1	TMED3_HUMAN	25 kDa	0	0	0	0	0.73906	0.37076	0	0.36994	0	0.34128	0.33049	0.223923	0	0	0	0	0	0	0	0	0	0	0.42186	0.14062
Cullin-associated NEDD8-dissociated protein 1 OS=Homo sapiens GN=CAND1 PE=1 SV=2	CAND1_HUMAN	136 kDa	0.74652	0	0	0.24884	0	0	0	0	0	0	0	0	0	0	0	0	0	0	0	0	0	1.5073	0	0.502433
Alcohol dehydrogenase class-3 OS=Homo sapiens GN=ADH5 PE=1 SV=4	ADHX_HUMAN	40 kDa	0	0	0	0	0	0	0	0	0	0	0.33049	0.110163	0	0	0	0	0	0	0.38774	0.129247	0	1.5073	0	0.502433
Tax1-binding protein 1 OS=Homo sapiens GN=TAX1BP1 PE=1 SV=2	TAXB1_HUMAN	91 kDa	0.40008	2.1728	2.224	1.59896	0	0	0	0	0	0	1.4521	0.484033	0	0	0	0	0	0	0	0	0	0	0	0
Dihydrolipoyllysine-residue acetyltransferase component of pyruvate dehydrogenase complex, mitochondrial OS=Homo sapiens GN=DLAT PE=1 SV=3	ODP2_HUMAN	69 kDa	0	0	0	0	0	0	0	0	0	0.3065	0.5274	0.277967	0	0	0.53796	0.17932	0	0.38373	0	0.12791	0	0	0	0
Probable U3 small nucleolar RNA-associated protein 11 OS=Homo sapiens GN=UTP11 PE=1 SV=2	UTP11_HUMAN	30 kDa	0	0.31127	0.62618	0.312483	0	0	0.77994	0.25998	0	0.34128	0	0.11376	0.33678	0	0	0.11226	0	0	0	0	0	0	0	0
Breast cancer type 2 susceptibility protein OS=Homo sapiens GN=BRCA2 PE=1 SV=3	BRCA2_HUMAN	384 kDa	0.34644	0.31127	0	0.219237	0	0	0	0	0	0	0	0	0	0	0	0	1.8383	0.76708	0	0.86846	0	0	0	0
Pre-mRNA-processing factor 40 homolog A OS=Homo sapiens GN=PRPF40A PE=1 SV=2	PR40A_HUMAN	109 kDa	0	0	0	0	0.64806	0	0	0.21602	0	0	0	0	0.94145	0	0	0.313817	0	0	0	0	0	0	0	0
39S ribosomal protein L46, mitochondrial OS=Homo sapiens GN=MRPL46 PE=1 SV=1	RM46_HUMAN	32 kDa	0	0	0	0	0	0	0	0	0	0	0	0	0	0	0	0	1.1057	1.5339	0	0.879867	0	0	0	0
Nucleolysin TIA-1 isoform p40 OS=Homo sapiens GN=TIA1 PE=1 SV=3	TIA1_HUMAN	43 kDa	1.1661	0	2.5047	1.2236	0	0	0	0	0	0	0	0	0	0	0	0	0	0	0	0	0	0	0	0
V-type proton ATPase subunit d 1 OS=Homo sapiens GN=ATP6V0D1 PE=1 SV=1	VA0D1_HUMAN	40 kDa	0.34644	0	0	0.11548	0	0.33049	0	0.110163	0.30105	0.613	0	0.304683	0	0	0	0	0	0	0	0	0	0	0	0
WW domain-binding protein 11 OS=Homo sapiens GN=WBP11 PE=1 SV=1	WBP11_HUMAN	70 kDa	0	0	0	0	0.73906	0	0.77994	0.506333	0	0	0	0	0.33678	0	0	0.11226	0	0	0	0	0	0	0	0
Bromodomain-containing protein 7 OS=Homo sapiens GN=BRD7 PE=1 SV=1	BRD7_HUMAN	74 kDa	0	0	0	0	1.4691	0.85742	0	0.775507	0	0	0	0	1.5251	0	0	0.508367	0	0	0	0	0	0	0	0
Ubiquitin-conjugating enzyme E2 N OS=Homo sapiens GN=UBE2N PE=1 SV=1	UBE2N_HUMAN	17 kDa	0	0	0	0	0	0	0	0	0	0	0	0	0	0	0	0	0	0	0.38774	0.129247	0	1.4941	0	0.498033
Spermatogenesis-associated protein 7 OS=Homo sapiens GN=SPATA7 PE=1 SV=3	SPAT7_HUMAN	68 kDa	0	0	0.30134	0.100447	0	0	0	0	0.30105	0	0	0.10035	0	0	0	0	1.4837	0	0	0.494567	0	0	0	0
Pecanex-like protein 2 OS=Homo sapiens GN=PCNX2 PE=2 SV=3	PCX2_HUMAN	237 kDa	0.34644	0	0	0.11548	0	0	0	0	0.30105	0	6.5459	2.28232	0	0	0	0	0	0	0.38774	0.129247	0	0	0	0
Cytoplasmic dynein 1 intermediate chain 2 OS=Homo sapiens GN=DYNC1I2 PE=1 SV=3	DC1I2_HUMAN	71 kDa	1.1661	1.7744	1.2524	1.39763	0	0	0	0	0	0	0	0	0	0	0	0	0	0	0	0	0	0	0	0
StAR-related lipid transfer protein 9 OS=Homo sapiens GN=STARD9 PE=1 SV=3	STAR9_HUMAN	516 kDa	0	0	0	0	0	0.37076	0	0.123587	0	0	0	0	0	0	0	0	1.6585	0	0.71563	0.791377	0	0	0	0
ATP-binding cassette sub-family F member 1 OS=Homo sapiens GN=ABCF1 PE=1 SV=2	ABCF1_HUMAN	96 kDa	0	1.1985	1.8785	1.02567	0	0	0	0	0	0	0	0	0	0	0	0	0	0	0	0	0	0	0	0
Dynein heavy chain 11, axonemal OS=Homo sapiens GN=DNAH11 PE=1 SV=4	DYH11_HUMAN	520 kDa	3.4775	0	0.60268	1.36006	0	0	0	0	0	0	0	0	0	0	0	0	0	0	0	0	0	2.9931	0	0.9977
Hepatoma-derived growth factor OS=Homo sapiens GN=HDGF PE=1 SV=1	HDGF_HUMAN	27 kDa	0	0	0	0	0	0	0	0	0	0	0	0	0	0	0	0	0.55285	1.0226	0.48762	0.68769	0	0.38344	0.84372	0.409053
Bifunctional methylenetetrahydrofolate dehydrogenase/cyclohydrolase, mitochondrial OS=Homo sapiens GN=MTHFD2 PE=1 SV=2	MTDC_HUMAN	38 kDa	0	0	0	0	0	0	0	0	0	0	0	0	0	0	0	0	1.1057	1.5339	0	0.879867	0	0	0	0
Alpha-globin transcription factor CP2 OS=Homo sapiens GN=TFCP2 PE=1 SV=2	TFCP2_HUMAN	57 kDa	0	0	0.72614	0.242047	0	0	0	0	0	0.34128	0	0.11376	0	0	0	0	0	0	0	0	0.80995	0	0	0.269983
Lipopolysaccharide-responsive and beige-like anchor protein OS=Homo sapiens GN=LRBA PE=1 SV=4	LRBA_HUMAN	319 kDa	0	0	0	0	0	0	0	0	0	0	0	0	0	0	0	0	0	0	0	0	1.0097	2.2788	0	1.09617
1-acyl-sn-glycerol-3-phosphate acyltransferase alpha OS=Homo sapiens GN=AGPAT1 PE=1 SV=2	PLCA_HUMAN	32 kDa	0	0	0	0	0	0	0	0	0	0.613	0	0.204333	0	0	0.53796	0.17932	0	0	0	0	0	0	0	0
Quinone oxidoreductase OS=Homo sapiens GN=CRYZ PE=1 SV=1	QOR_HUMAN	35 kDa	0	0	0	0	0	0	0	0	0	0	0	0	0	0	0	0	0	0	0	0	0	1.5338	0	0.511267
Histone-lysine N-methyltransferase EHMT2 OS=Homo sapiens GN=EHMT2 PE=1 SV=3	EHMT2_HUMAN	132 kDa	0	0	0	0	4.4176	0	0	1.47253	0	0	0	0	1.7969	0	0	0.598967	0	0	0	0	0	0	0	0
Mitogen-activated protein kinase kinase kinase 1 OS=Homo sapiens GN=MAP3K1 PE=1 SV=4	M3K1_HUMAN	164 kDa	0	0	0	0	1.4725	0	0	0.490833	0	0	6.5459	2.18197	0	0	0	0	0	0	0	0	0	1.1355	0	0.3785
E3 ubiquitin-protein ligase UBR4 OS=Homo sapiens GN=UBR4 PE=1 SV=1	UBR4_HUMAN	574 kDa	0	0	0.36307	0.121023	0.36953	0	0	0.123177	0	0	0	0	0	0	0	0	0	1.0226	0	0.340867	0	0	0.81439	0.271463
Fructosamine-3-kinase OS=Homo sapiens GN=FN3K PE=1 SV=1	FN3K_HUMAN	35 kDa	0	0	1.0892	0.363067	0	0	0	0	0	0	0	0	0	0	0	0	0	0	0	0	0	0	0.42186	0.14062
Gag-Pol polyprotein OS=Human immunodeficiency virus type 2 subtype A (isolate ROD) GN=gag-pol PE=1 SV=3	sp|P04584|POL_HV2RO	?	0	0	0	0	0	0	0	0	0	0	0	0	0	0	0	0	0	0.76708	0	0.255693	2.0194	0	1.6288	1.21607
Alcohol dehydrogenase 4 OS=Homo sapiens GN=ADH4 PE=1 SV=5	ADH4_HUMAN	40 kDa	0	0	0	0	0	0	0	0	0	0	0	0	0	0	0	0	0	0	0	0	0	1.1503	0	0.383433
CTD small phosphatase-like protein 2 OS=Homo sapiens GN=CTDSPL2 PE=1 SV=2	CTSL2_HUMAN	53 kDa	0	0	0.62618	0.208727	1.4691	0	0	0.4897	0	0	0	0	0	0	0	0	0	0	0	0	0	0	0	0
Dermcidin OS=Homo sapiens GN=DCD PE=1 SV=2	DCD_HUMAN	11 kDa	0	0	0	0	0	0	0	0	0	0	0	0	0	0	0	0	0	0	0	0	1.2149	0	0	0.404967
Translin OS=Homo sapiens GN=TSN PE=1 SV=1	TSN_HUMAN	26 kDa	0	0	0	0	0	0	0	0	0	0	0	0	0	0	0	0	0	0	0	0	0	1.1503	0	0.383433
LIM and SH3 domain protein 1 OS=Homo sapiens GN=LASP1 PE=1 SV=2	LASP1_HUMAN	30 kDa	0	0	0	0	0	0	0	0	0	0	0	0	0	0	0	0	0	0	0	0	1.1856	0	0	0.3952
Endothelin-converting enzyme 1 OS=Homo sapiens GN=ECE1 PE=1 SV=2	ECE1_HUMAN	87 kDa	0	0	0	0	0.36953	0	0	0.123177	0	0	0	0	0	0.631	0	0.210333	0	0	0	0	0	0	0	0
Adenylate kinase isoenzyme 1 OS=Homo sapiens GN=AK1 PE=1 SV=3	KAD1_HUMAN	22 kDa	0	0	0	0	0	0	0	0	0	0	0.99147	0.33049	0	0	0	0	0	0	0	0	0	0	0	0
Oxysterol-binding protein-related protein 10 OS=Homo sapiens GN=OSBPL10 PE=1 SV=2	OSB10_HUMAN	84 kDa	0	0	0	0	0	0	0	0	0	10.782	0	3.594	0	0.3155	0	0.105167	0	0	0	0	0	0	0	0
PHD finger protein 20-like protein 1 OS=Homo sapiens GN=PHF20L1 PE=1 SV=2	P20L1_HUMAN	115 kDa	0	0	0	0	0	0	0	0	0	0	0	0	0.60467	0	0	0.201557	0	0.5113	0	0.170433	0	0	0	0
Probable 2-oxoglutarate dehydrogenase E1 component DHKTD1, mitochondrial OS=Homo sapiens GN=DHTKD1 PE=1 SV=2	DHTK1_HUMAN	103 kDa	0	0	0	0	0	0	0	0	0	5.4378	0.81738	2.08506	0	0	0	0	0	0	0	0	0	0	0	0
Rho GTPase-activating protein 15 OS=Homo sapiens GN=ARHGAP15 PE=1 SV=2	RHG15_HUMAN	55 kDa	0	0	0	0	0	0	0	0	0	0	0	0	0	0	1.6943	0.564767	0	0	0	0	0	0	0	0
Acetyl-coenzyme A synthetase 2-like, mitochondrial OS=Homo sapiens GN=ACSS1 PE=1 SV=2	ACS2L_HUMAN	75 kDa	0	0	5.564	1.85467	0	0	0	0	0	0	0	0	0	0	0	0	0	0	0	0	0	0	0	0
Cytoskeleton-associated protein 5 OS=Homo sapiens GN=CKAP5 PE=1 SV=3	CKAP5_HUMAN	226 kDa	0	0	0	0	0	0	0	0	0	0	0	0	0.33678	0	0	0.11226	0	0	0	0	0	0	0.8367	0.2789
Pre-mRNA-splicing factor SYF1 OS=Homo sapiens GN=XAB2 PE=1 SV=2	SYF1_HUMAN	100 kDa	0	0	1.2524	0.417467	0	0	0.90736	0.302453	0	0	0	0	0	0	0	0	0	0	0	0	0	0	0	0
Glycylpeptide N-tetradecanoyltransferase 1 OS=Homo sapiens GN=NMT1 PE=1 SV=2	NMT1_HUMAN	57 kDa	0	0	0	0	0	0	0	0	0	0	0	0	0	0	0	0	1.1057	0	0	0.368567	0.80995	0	0.84372	0.551223
Alanine aminotransferase 2 OS=Homo sapiens GN=GPT2 PE=1 SV=1	ALAT2_HUMAN	58 kDa	0	0	0	0	0	0	0	0	0	0	0	0	0	0	0	0	0	0	1.4628	0.4876	0	0	0	0
Androglobin OS=Homo sapiens GN=ADGB PE=2 SV=3	ADGB_HUMAN	190 kDa	0	0	0	0	0	0	0	0	0	0.3065	0.5274	0.277967	0	0	0	0	0	0	0	0	0	0	0	0
CDK5 regulatory subunit-associated protein 3 OS=Homo sapiens GN=CDK5RAP3 PE=1 SV=2	CK5P3_HUMAN	57 kDa	0	0	0	0	0	0.33049	0	0.110163	0	0	0.7911	0.2637	0	0.30434	0	0.101447	0	0	0	0	0	0	0	0
UDP-glucuronosyltransferase 2B17 OS=Homo sapiens GN=UGT2B17 PE=1 SV=1	UDB17_HUMAN	61 kDa	0	2.1912	0	0.7304	0	3.1537	0	1.05123	51.822	21.563	16.365	29.9167	20.054	18.642	10.073	16.2563	23.546	7.6935	6.3331	12.5242	44.828	8.2573	15.893	22.9928
NLR family member X1 OS=Homo sapiens GN=NLRX1 PE=1 SV=1	NLRX1_HUMAN	108 kDa	0	0	0	0	0	0	0	0	0	0	0	0	0	0	0.64941	0.21647	0	0	0	0	0	0	0	0
Collagen alpha-1(X) chain OS=Homo sapiens GN=COL10A1 PE=1 SV=2	COAA1_HUMAN	66 kDa	0	0	0	0	0	0	0	0	0	0	0	0	0	0	0	0	0	0	0	0	0	0	3.5287	1.17623
Basement membrane-specific heparan sulfate proteoglycan core protein OS=Homo sapiens GN=HSPG2 PE=1 SV=4	PGBM_HUMAN	469 kDa	0	0	0	0	0	0	0	0	0	0	0	0	0	0	0	0	0	0	0	0	0	2.271	0	0.757
Zinc finger and BTB domain-containing protein 11 OS=Homo sapiens GN=ZBTB11 PE=1 SV=2	ZBT11_HUMAN	119 kDa	0	0	0	0	0	0	0	0	0	0	0	0	0	0	0	0	0	0	0	0	0	2.9931	0	0.9977
Putative sodium-coupled neutral amino acid transporter 10 OS=Homo sapiens GN=SLC38A10 PE=1 SV=2	S38AA_HUMAN	120 kDa	0	0	0	0	0	0	0	0	0	0	0	0	0	0	0.64941	0.21647	0	0	0	0	0	0	0	0
Genome polyprotein OS=Hepatitis C virus genotype 1a (isolate H) PE=1 SV=3	sp|P27958|POLG_HCVH	?	0	0	0	0	0	0	0	0	0	0	0	0	0	0	0	0	5.7067	0	0	1.90223	0	0	0	0
Chromodomain-helicase-DNA-binding protein 3 OS=Homo sapiens GN=CHD3 PE=1 SV=3	CHD3_HUMAN	227 kDa	0	0	0	0	0	0	1.7349	0.5783	0	5.4378	0	1.8126	3.5938	1.6861	0	1.75997	5.7067	1.8459	0	2.51753	7.9894	0	3.5287	3.83937
WD repeat-containing protein 81 OS=Homo sapiens GN=WDR81 PE=1 SV=2	WDR81_HUMAN	212 kDa	0	0	0	0	0	0	0	0	0	0	0	0	0	0	0	0	0	3.8467	0	1.28223	0	0	0	0
Nck-associated protein 1 OS=Homo sapiens GN=NCKAP1 PE=1 SV=1	NCKP1_HUMAN	129 kDa	0	0	0	0	0.73906	0	0	0.246353	0	0	0	0	0	0	0	0	0	0	0	0	0	0	0	0
ATP-binding cassette sub-family E member 1 OS=Homo sapiens GN=ABCE1 PE=1 SV=1	ABCE1_HUMAN	67 kDa	0	0	0	0	0	0	0	0	0	0	0	0	0	0	0	0	0	1.0226	0	0.340867	0	0	0	0
Histone deacetylase 3 OS=Homo sapiens GN=HDAC3 PE=1 SV=2	HDAC3_HUMAN	49 kDa	0	0	0	0	0	0	1.1699	0.389967	0	0	0	0	0	0	0	0	0	0	0	0	0	0	0	0
